# Supplementary material for: Integrated Analysis of MicroRNA (miRNA) and mRNA Profiles Reveals Reduced Correlation between MicroRNA and Target Gene in Cancer
Source: Hindawi journal article supplement (doi:10.1155/2018/1972606), 2018-12-06

Pearson Correlation Coefficients

Gene

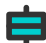

down

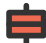

up

Clinical Stages

**BLCA(1151)**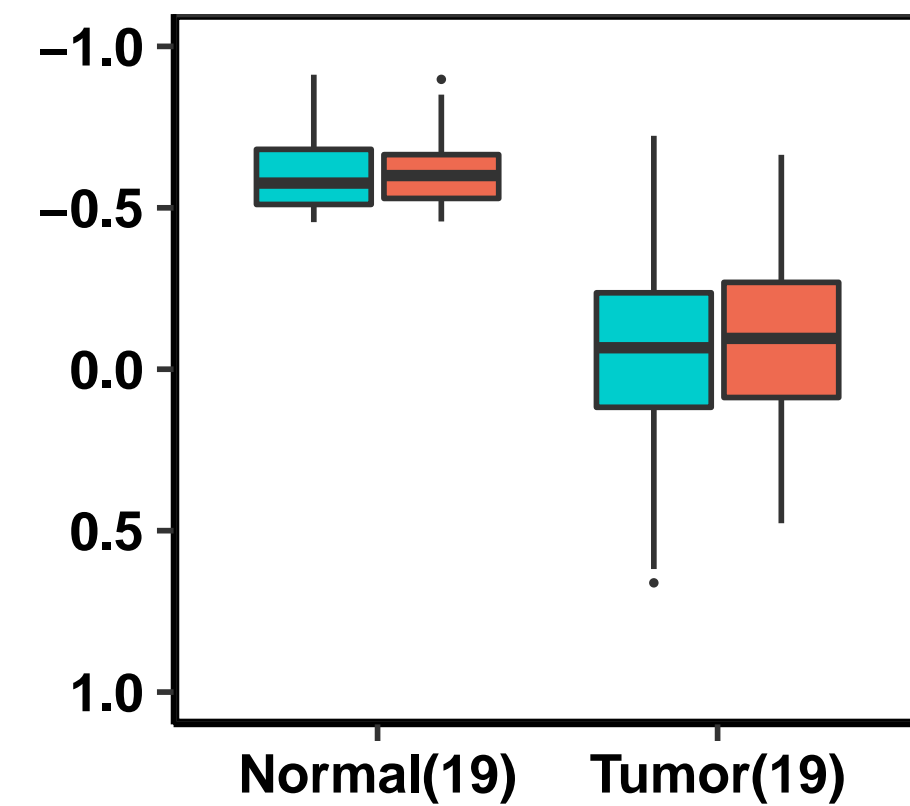**BRCA(982)**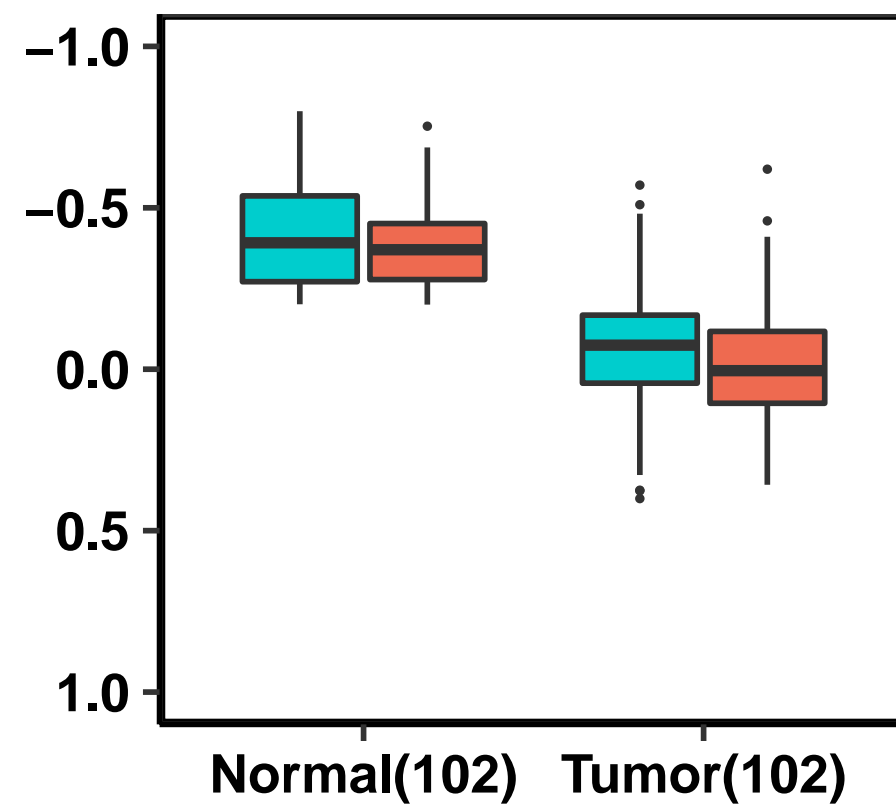**HNSC(482)**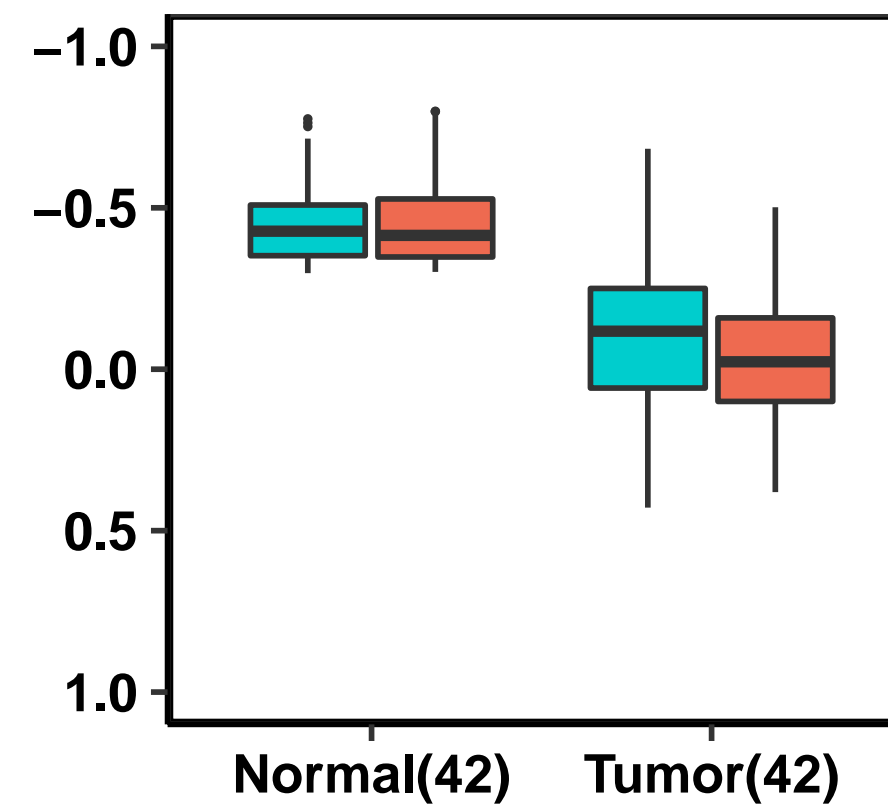**KICH(321)**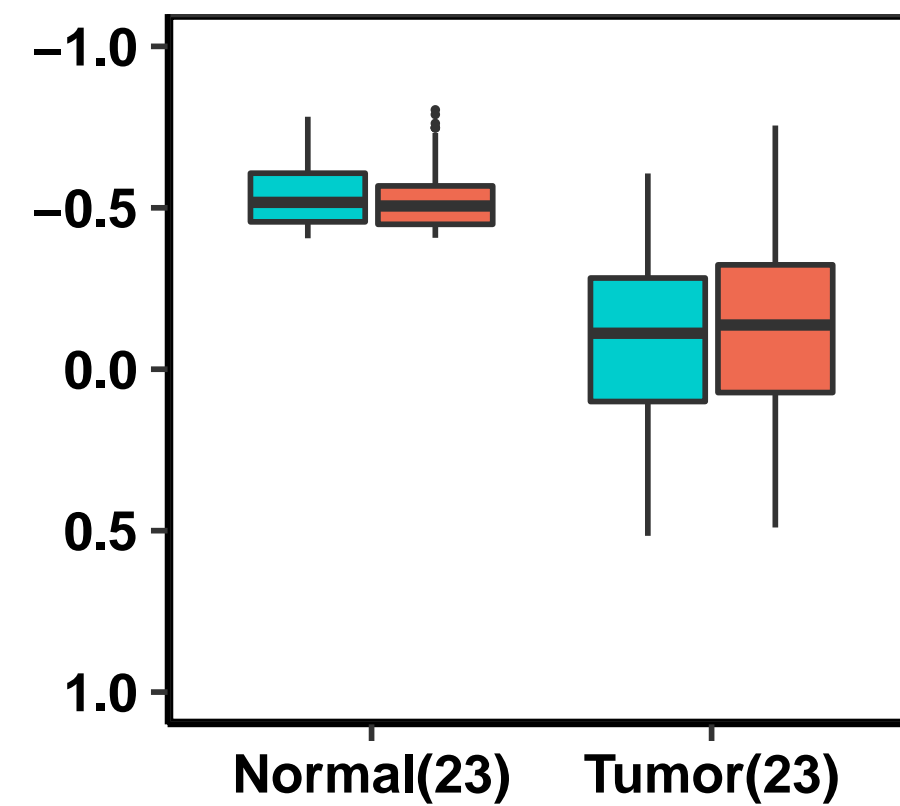**KIRC(609)**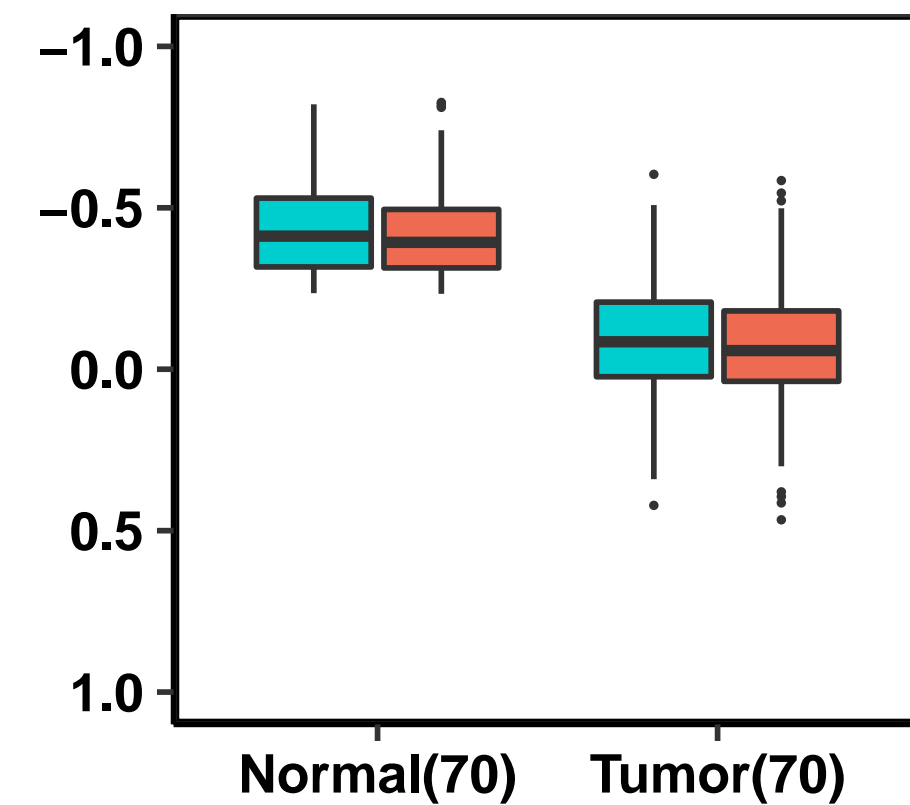**KIRP(366)**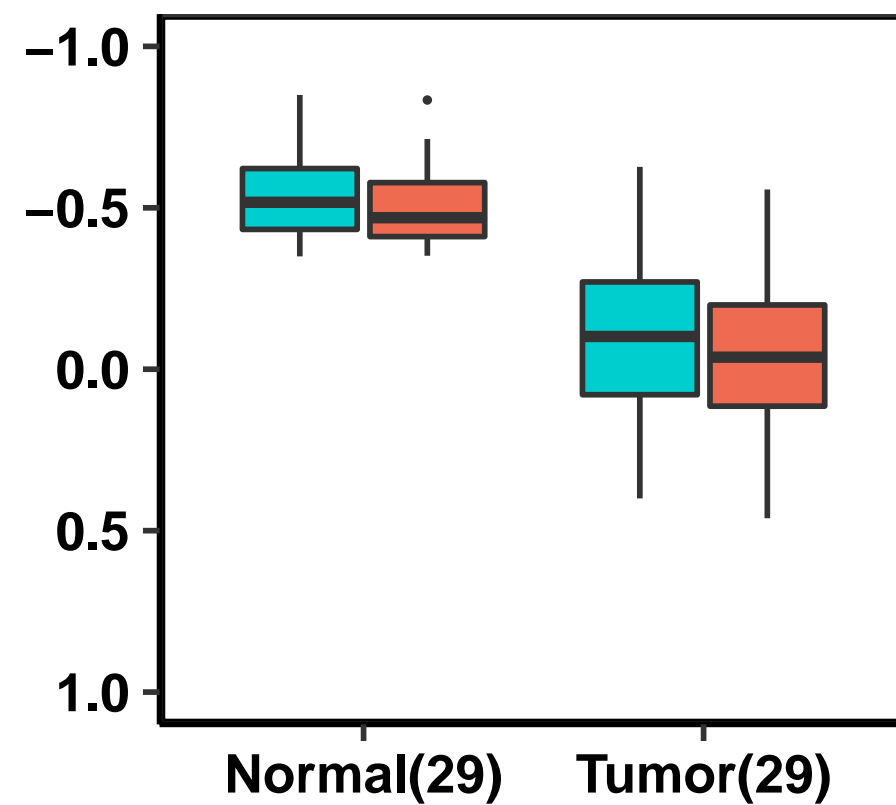**LIHC(234)**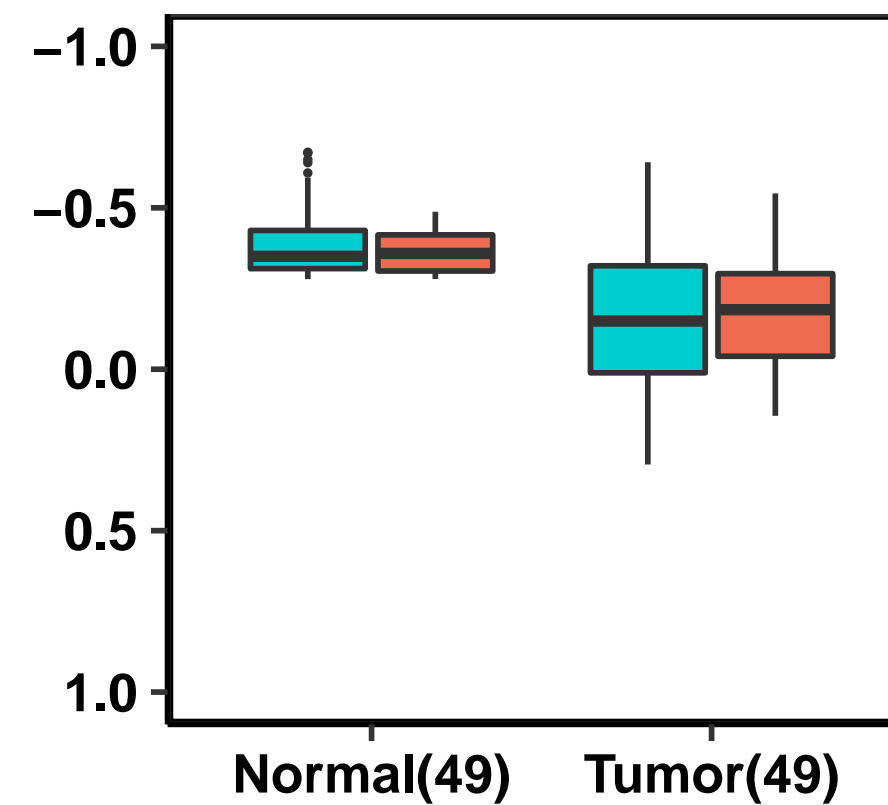**LUAD(146)**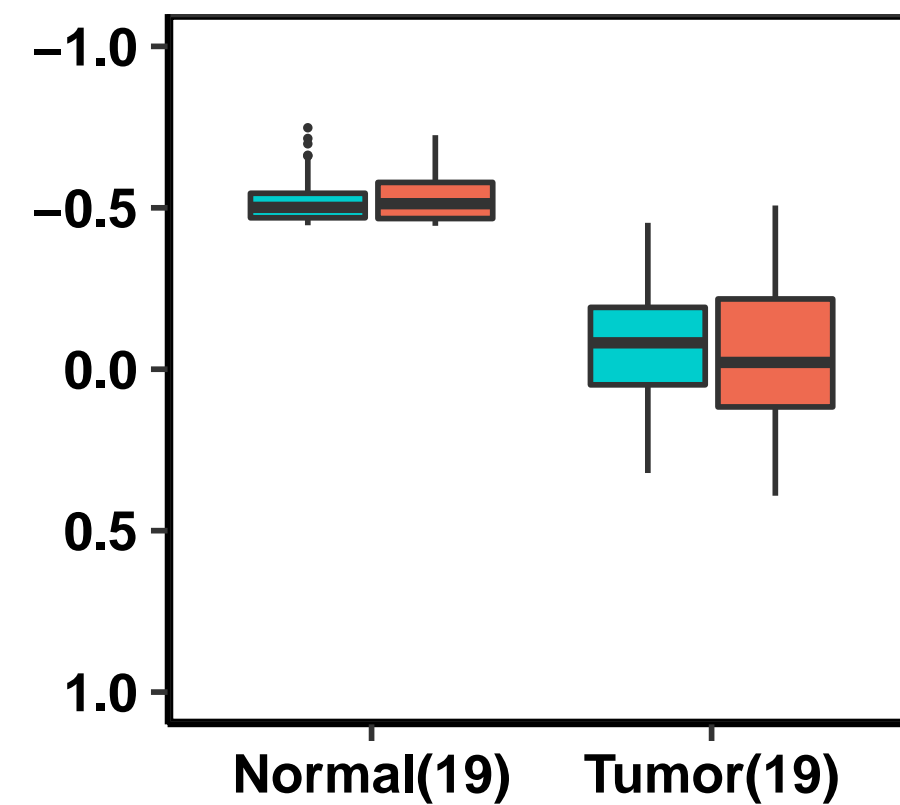**LUSC(455)**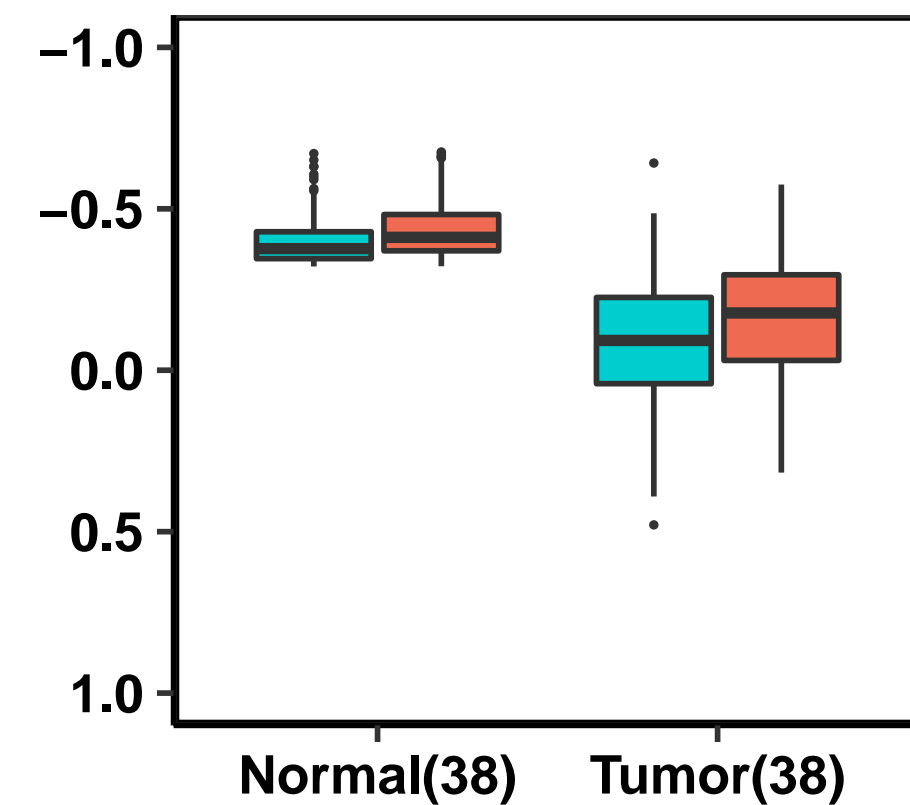**STAD(643)**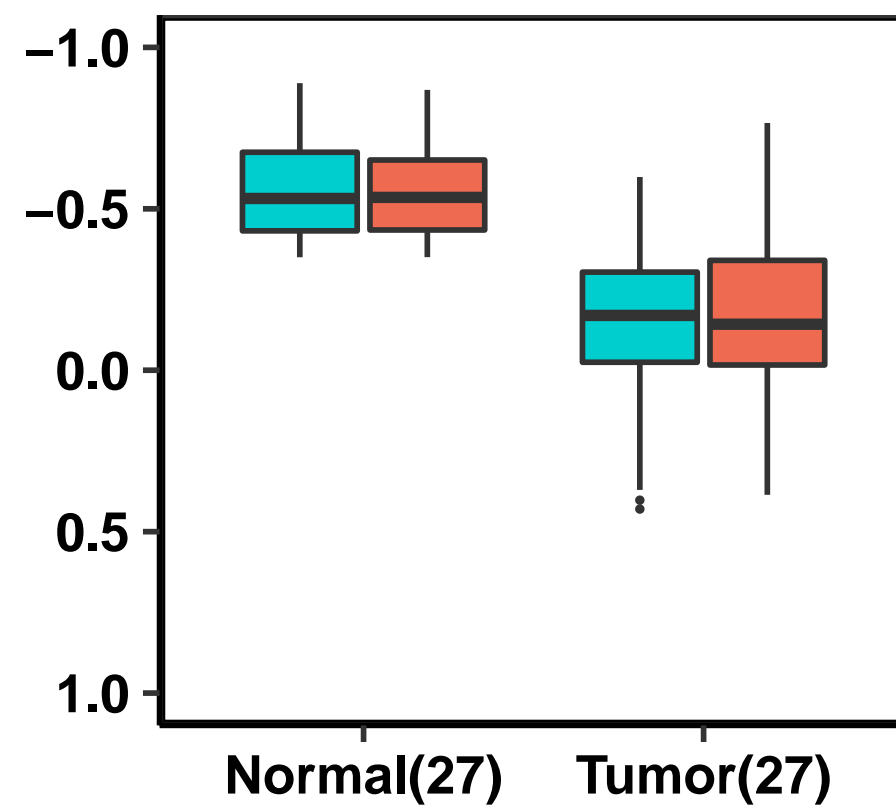**THCA(53)**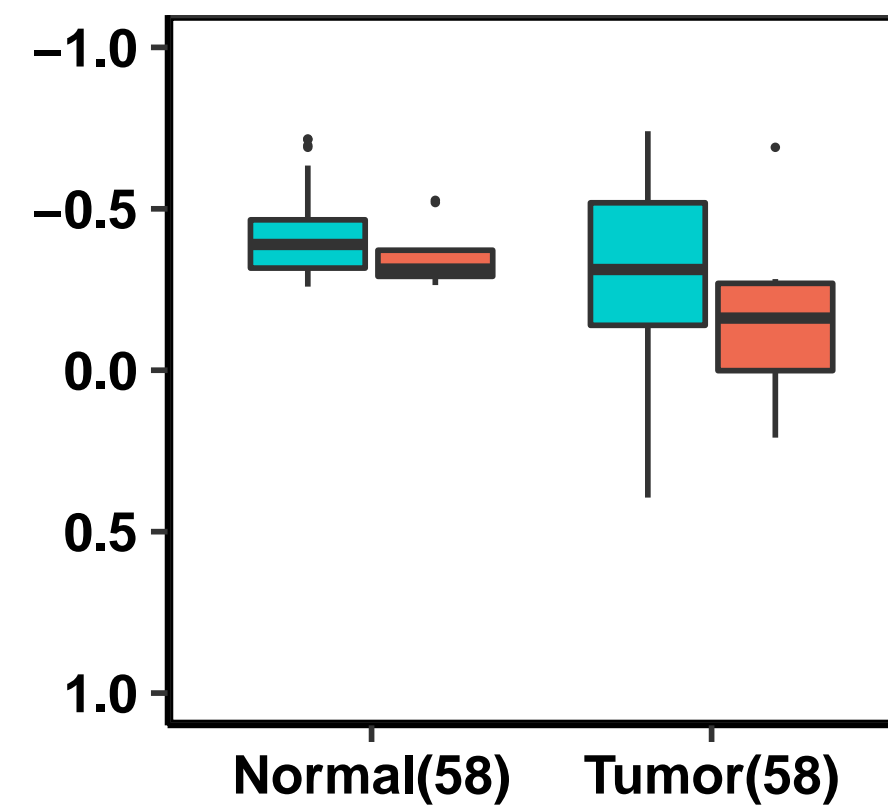**Pan-Cancers**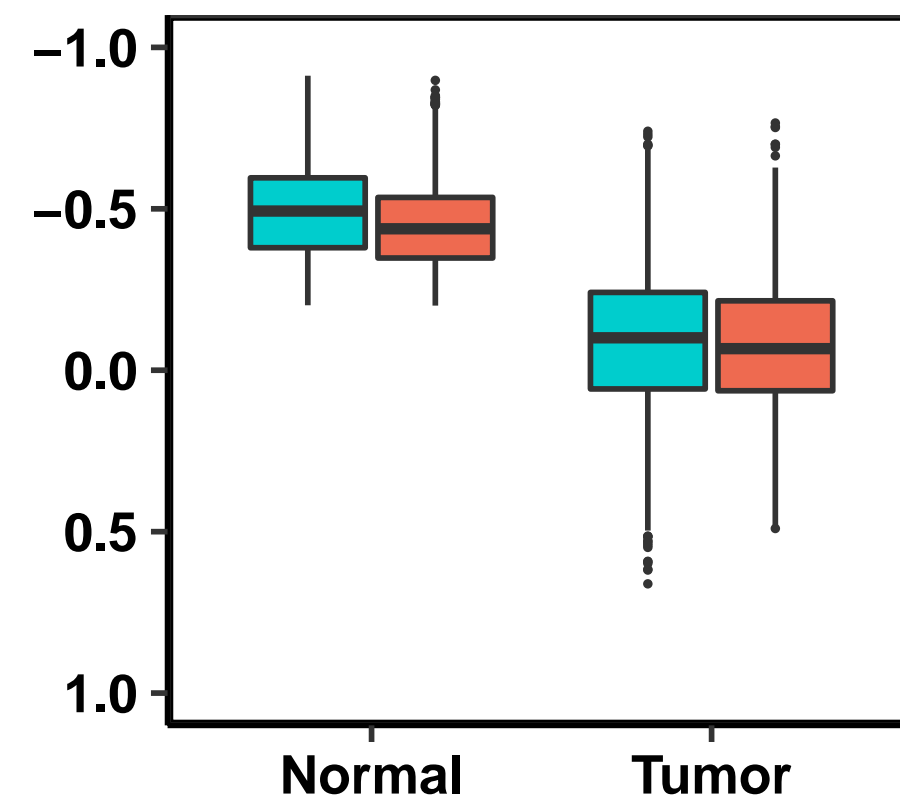

Supplement: f1 [file 1972606.f1.zip]
