# Supplementary material for: Integrated Analysis of MicroRNA (miRNA) and mRNA Profiles Reveals Reduced Correlation between MicroRNA and Target Gene in Cancer
Source: Biomed Res Int. 2018 Dec 6;2018:1972606. doi: 10.1155/2018/1972606 (PMC6304515; doi:10.1155/2018/1972606)
Supplement: Supplementary Materials — Figure S1. Expression density distribution of mRNAs and miRNAs before and after filtering. Figure S2. Distribution of the PCC values of critical miRNA-target gene pairs in healthy controls and 4 clinically staged tumors. Figure S3: Simple correlations coefficients (Cor) and partial correlation coefficients (Pcor) of critical pairs in normal and tumor samples of LIHC. Figure S4: Simple correlations coefficients (Cor) and partial correlation coefficients (Pcor) of critical pairs in normal and tumor samples of LUAD. Figure S5: Simple correlations coefficients (Cor) and partial correlation coefficients (Pcor) of critical pairs in tumor samples of LIHC. Figure S6: Simple correlations coefficients (Pearson correlation coefficient) and partial correlation coefficients (given CNAs effects) of critical pairs in cancer samples of LUAD. Table S1: Sample sizes for each cancer type. Table S2. Sample clinical and grouping information for each cancer type. Table S3. List of DEMs for each cancer type. Table S4. List of DEGs for each cancer type. Table S5. Frequency of DEMs and DEGs in 11 cancer types. Table S6. List of critical miRNA-target gene pairs for each cancer type. Table S7: Interactional references and gene functional references for some critical miRNA-target pairs. Table S8. Frequency of critical miRNA-target pairs in 11 cancer types. Table S9. List of the significantly GO annotation terms (p < 0.05) for the critical target genes in each cancer type. Table S10. List of the significantly KEGG pathway terms (p < 0.05) for the critical target genes in each cancer type. Table S11. Partial and simple correlation coefficients for each critical pair in normal and tumor samples of LUAD and LIHC when controlling methylation or CNAs effect. [file 1972606.f1.zip]

Archive with 17 entries (16 files):
- 1972606.f1/
- 1972606.f1/Table S10_BMRI_2598529.xlsx
- 1972606.f1/Table S11_BMRI_2598530.xlsx
- 1972606.f1/Table S1_BMRI_2598510.docx
- 1972606.f1/Table S2_BMRI_2598511.xlsx
- 1972606.f1/Table S3_BMRI_2598512.xlsx
- 1972606.f1/Table S4_BMRI_2598513.xlsx
- 1972606.f1/Table S5_BMRI_2598514.xlsx
- 1972606.f1/Table S6_BMRI_2598515.xlsx
- 1972606.f1/Table S7_BMRI_2598516.docx
- 1972606.f1/Table S8_BMRI_2598517.xlsx
- 1972606.f1/Table S9_BMRI_2598518.xlsx
- 1972606.f1/Figure 1_BMRI_2598501.vsd
- 1972606.f1/Figure 2_BMRI_2598502.xlsx
- 1972606.f1/Figure 3_BMRI_2598503.pdf
- 1972606.f1/Figure 4_BMRI_2598504.pdf
- 1972606.f1/Figure 5_BMRI_2598505.cys
