# Supplementary material for: Integrated Analysis of MicroRNA (miRNA) and mRNA Profiles Reveals Reduced Correlation between MicroRNA and Target Gene in Cancer
Source: Biomed Res Int. 2018 Dec 6;2018:1972606. doi: 10.1155/2018/1972606 (PMC6304515; doi:10.1155/2018/1972606)
Supplement: Supplementary Materials — Figure S1. Expression density distribution of mRNAs and miRNAs before and after filtering. Figure S2. Distribution of the PCC values of critical miRNA-target gene pairs in healthy controls and 4 clinically staged tumors. Figure S3: Simple correlations coefficients (Cor) and partial correlation coefficients (Pcor) of critical pairs in normal and tumor samples of LIHC. Figure S4: Simple correlations coefficients (Cor) and partial correlation coefficients (Pcor) of critical pairs in normal and tumor samples of LUAD. Figure S5: Simple correlations coefficients (Cor) and partial correlation coefficients (Pcor) of critical pairs in tumor samples of LIHC. Figure S6: Simple correlations coefficients (Pearson correlation coefficient) and partial correlation coefficients (given CNAs effects) of critical pairs in cancer samples of LUAD. Table S1: Sample sizes for each cancer type. Table S2. Sample clinical and grouping information for each cancer type. Table S3. List of DEMs for each cancer type. Table S4. List of DEGs for each cancer type. Table S5. Frequency of DEMs and DEGs in 11 cancer types. Table S6. List of critical miRNA-target gene pairs for each cancer type. Table S7: Interactional references and gene functional references for some critical miRNA-target pairs. Table S8. Frequency of critical miRNA-target pairs in 11 cancer types. Table S9. List of the significantly GO annotation terms (p < 0.05) for the critical target genes in each cancer type. Table S10. List of the significantly KEGG pathway terms (p < 0.05) for the critical target genes in each cancer type. Table S11. Partial and simple correlation coefficients for each critical pair in normal and tumor samples of LUAD and LIHC when controlling methylation or CNAs effect. [file 1972606.f1.zip › 1972606.f1/Table S2_BMRI_2598511.xlsx]

## Sheet: BLCA
Step 1 (Differential analysis )								Step 2 (Correlation analysis)				Step 3 (Confirm correlation result)
miRNA sequencing				RNA sequencing				RNA sequencing and miRNA sequencing				Paired samples
Samples	Patients	Stages	Groups	Samples	Patients	Stages	Groups	Samples	Patients	Stages	Groups	Samples	Patients	Stages	Groups
TCGA-BL-A13J-11	TCGA-BL-A13J	HC	HC	TCGA-BL-A13J-11	TCGA-BL-A13J	HC	HC	TCGA-BL-A13J-11	TCGA-BL-A13J	HC	HC	TCGA-BL-A13J-11	TCGA-BL-A13J	HC	HC
TCGA-BT-A20N-11	TCGA-BT-A20N	HC	HC	TCGA-BT-A20N-11	TCGA-BT-A20N	HC	HC	TCGA-BT-A20N-11	TCGA-BT-A20N	HC	HC	TCGA-BL-A13J-01	TCGA-BL-A13J	IV	Advanced
TCGA-BT-A20Q-11	TCGA-BT-A20Q	HC	HC	TCGA-BT-A20Q-11	TCGA-BT-A20Q	HC	HC	TCGA-BT-A20Q-11	TCGA-BT-A20Q	HC	HC	TCGA-BT-A20N-11	TCGA-BT-A20N	HC	HC
TCGA-BT-A20R-11	TCGA-BT-A20R	HC	HC	TCGA-BT-A20R-11	TCGA-BT-A20R	HC	HC	TCGA-BT-A20R-11	TCGA-BT-A20R	HC	HC	TCGA-BT-A20N-01	TCGA-BT-A20N	III	Advanced
TCGA-BT-A20U-11	TCGA-BT-A20U	HC	HC	TCGA-BT-A20U-11	TCGA-BT-A20U	HC	HC	TCGA-BT-A20U-11	TCGA-BT-A20U	HC	HC	TCGA-BT-A20Q-11	TCGA-BT-A20Q	HC	HC
TCGA-BT-A20W-11	TCGA-BT-A20W	HC	HC	TCGA-BT-A20W-11	TCGA-BT-A20W	HC	HC	TCGA-BT-A20W-11	TCGA-BT-A20W	HC	HC	TCGA-BT-A20Q-01	TCGA-BT-A20Q	IV	Advanced
TCGA-BT-A2LA-11	TCGA-BT-A2LA	HC	HC	TCGA-BT-A2LA-11	TCGA-BT-A2LA	HC	HC	TCGA-BT-A2LA-11	TCGA-BT-A2LA	HC	HC	TCGA-BT-A20R-11	TCGA-BT-A20R	HC	HC
TCGA-BT-A2LB-11	TCGA-BT-A2LB	HC	HC	TCGA-BT-A2LB-11	TCGA-BT-A2LB	HC	HC	TCGA-BT-A2LB-11	TCGA-BT-A2LB	HC	HC	TCGA-BT-A20R-01	TCGA-BT-A20R	IV	Advanced
TCGA-CU-A0YN-11	TCGA-CU-A0YN	HC	HC	TCGA-CU-A0YN-11	TCGA-CU-A0YN	HC	HC	TCGA-CU-A0YN-11	TCGA-CU-A0YN	HC	HC	TCGA-BT-A20U-11	TCGA-BT-A20U	HC	HC
TCGA-CU-A0YR-11	TCGA-CU-A0YR	HC	HC	TCGA-CU-A0YR-11	TCGA-CU-A0YR	HC	HC	TCGA-CU-A0YR-11	TCGA-CU-A0YR	HC	HC	TCGA-BT-A20U-01	TCGA-BT-A20U	III	Advanced
TCGA-GC-A3BM-11	TCGA-GC-A3BM	HC	HC	TCGA-GC-A3BM-11	TCGA-GC-A3BM	HC	HC	TCGA-GC-A3BM-11	TCGA-GC-A3BM	HC	HC	TCGA-BT-A20W-11	TCGA-BT-A20W	HC	HC
TCGA-GC-A3WC-11	TCGA-GC-A3WC	HC	HC	TCGA-GC-A3WC-11	TCGA-GC-A3WC	HC	HC	TCGA-GC-A3WC-11	TCGA-GC-A3WC	HC	HC	TCGA-BT-A20W-01	TCGA-BT-A20W	II	Early
TCGA-GC-A6I3-11	TCGA-GC-A6I3	HC	HC	TCGA-GC-A6I3-11	TCGA-GC-A6I3	HC	HC	TCGA-GC-A6I3-11	TCGA-GC-A6I3	HC	HC	TCGA-BT-A2LA-11	TCGA-BT-A2LA	HC	HC
TCGA-GD-A2C5-11	TCGA-GD-A2C5	HC	HC	TCGA-GD-A2C5-11	TCGA-GD-A2C5	HC	HC	TCGA-GD-A2C5-11	TCGA-GD-A2C5	HC	HC	TCGA-BT-A2LA-01	TCGA-BT-A2LA	III	Advanced
TCGA-GD-A3OP-11	TCGA-GD-A3OP	HC	HC	TCGA-GD-A3OP-11	TCGA-GD-A3OP	HC	HC	TCGA-GD-A3OP-11	TCGA-GD-A3OP	HC	HC	TCGA-BT-A2LB-11	TCGA-BT-A2LB	HC	HC
TCGA-GD-A3OQ-11	TCGA-GD-A3OQ	HC	HC	TCGA-GD-A3OQ-11	TCGA-GD-A3OQ	HC	HC	TCGA-GD-A3OQ-11	TCGA-GD-A3OQ	HC	HC	TCGA-BT-A2LB-01	TCGA-BT-A2LB	III	Advanced
TCGA-K4-A3WV-11	TCGA-K4-A3WV	HC	HC	TCGA-K4-A3WV-11	TCGA-K4-A3WV	HC	HC	TCGA-K4-A3WV-11	TCGA-K4-A3WV	HC	HC	TCGA-CU-A0YN-11	TCGA-CU-A0YN	HC	HC
TCGA-K4-A54R-11	TCGA-K4-A54R	HC	HC	TCGA-K4-A54R-11	TCGA-K4-A54R	HC	HC	TCGA-K4-A54R-11	TCGA-K4-A54R	HC	HC	TCGA-CU-A0YN-01	TCGA-CU-A0YN	III	Advanced
TCGA-K4-A5RI-11	TCGA-K4-A5RI	HC	HC	TCGA-K4-A5RI-11	TCGA-K4-A5RI	HC	HC	TCGA-K4-A5RI-11	TCGA-K4-A5RI	HC	HC	TCGA-CU-A0YR-11	TCGA-CU-A0YR	HC	HC
TCGA-BL-A0C8-01	TCGA-BL-A0C8	I	Early	TCGA-BL-A0C8-01	TCGA-BL-A0C8	I	Early	TCGA-BL-A0C8-01	TCGA-BL-A0C8	I	Early	TCGA-CU-A0YR-01	TCGA-CU-A0YR	IV	Advanced
TCGA-CF-A9FM-01	TCGA-CF-A9FM	I	Early	TCGA-CF-A9FM-01	TCGA-CF-A9FM	I	Early	TCGA-CF-A9FM-01	TCGA-CF-A9FM	I	Early	TCGA-GC-A3BM-11	TCGA-GC-A3BM	HC	HC
TCGA-2F-A9KT-01	TCGA-2F-A9KT	II	Early	TCGA-2F-A9KT-01	TCGA-2F-A9KT	II	Early	TCGA-2F-A9KT-01	TCGA-2F-A9KT	II	Early	TCGA-GC-A3BM-01	TCGA-GC-A3BM	II	Early
TCGA-4Z-AA7O-01	TCGA-4Z-AA7O	II	Early	TCGA-4Z-AA7O-01	TCGA-4Z-AA7O	II	Early	TCGA-4Z-AA7O-01	TCGA-4Z-AA7O	II	Early	TCGA-GC-A3WC-11	TCGA-GC-A3WC	HC	HC
TCGA-4Z-AA7W-01	TCGA-4Z-AA7W	II	Early	TCGA-4Z-AA7W-01	TCGA-4Z-AA7W	II	Early	TCGA-4Z-AA7W-01	TCGA-4Z-AA7W	II	Early	TCGA-GC-A3WC-01	TCGA-GC-A3WC	III	Advanced
TCGA-4Z-AA7Y-01	TCGA-4Z-AA7Y	II	Early	TCGA-4Z-AA7Y-01	TCGA-4Z-AA7Y	II	Early	TCGA-4Z-AA7Y-01	TCGA-4Z-AA7Y	II	Early	TCGA-GC-A6I3-11	TCGA-GC-A6I3	HC	HC
TCGA-4Z-AA80-01	TCGA-4Z-AA80	II	Early	TCGA-4Z-AA80-01	TCGA-4Z-AA80	II	Early	TCGA-4Z-AA80-01	TCGA-4Z-AA80	II	Early	TCGA-GC-A6I3-01	TCGA-GC-A6I3	IV	Advanced
TCGA-4Z-AA81-01	TCGA-4Z-AA81	II	Early	TCGA-4Z-AA81-01	TCGA-4Z-AA81	II	Early	TCGA-4Z-AA81-01	TCGA-4Z-AA81	II	Early	TCGA-GD-A2C5-11	TCGA-GD-A2C5	HC	HC
TCGA-4Z-AA83-01	TCGA-4Z-AA83	II	Early	TCGA-4Z-AA83-01	TCGA-4Z-AA83	II	Early	TCGA-4Z-AA83-01	TCGA-4Z-AA83	II	Early	TCGA-GD-A2C5-01	TCGA-GD-A2C5	IV	Advanced
TCGA-BT-A20J-01	TCGA-BT-A20J	II	Early	TCGA-BT-A20J-01	TCGA-BT-A20J	II	Early	TCGA-BT-A20J-01	TCGA-BT-A20J	II	Early	TCGA-GD-A3OP-11	TCGA-GD-A3OP	HC	HC
TCGA-BT-A20W-01	TCGA-BT-A20W	II	Early	TCGA-BT-A20W-01	TCGA-BT-A20W	II	Early	TCGA-BT-A20W-01	TCGA-BT-A20W	II	Early	TCGA-GD-A3OP-01	TCGA-GD-A3OP	IV	Advanced
TCGA-BT-A3PK-01	TCGA-BT-A3PK	II	Early	TCGA-BT-A3PK-01	TCGA-BT-A3PK	II	Early	TCGA-BT-A3PK-01	TCGA-BT-A3PK	II	Early	TCGA-GD-A3OQ-11	TCGA-GD-A3OQ	HC	HC
TCGA-BT-A42C-01	TCGA-BT-A42C	II	Early	TCGA-BT-A42C-01	TCGA-BT-A42C	II	Early	TCGA-BT-A42C-01	TCGA-BT-A42C	II	Early	TCGA-GD-A3OQ-01	TCGA-GD-A3OQ	IV	Advanced
TCGA-C4-A0F0-01	TCGA-C4-A0F0	II	Early	TCGA-C4-A0F0-01	TCGA-C4-A0F0	II	Early	TCGA-C4-A0F0-01	TCGA-C4-A0F0	II	Early	TCGA-K4-A3WV-11	TCGA-K4-A3WV	HC	HC
TCGA-CF-A3MG-01	TCGA-CF-A3MG	II	Early	TCGA-CF-A3MG-01	TCGA-CF-A3MG	II	Early	TCGA-CF-A3MG-01	TCGA-CF-A3MG	II	Early	TCGA-K4-A3WV-01	TCGA-K4-A3WV	II	Early
TCGA-CF-A3MH-01	TCGA-CF-A3MH	II	Early	TCGA-CF-A3MH-01	TCGA-CF-A3MH	II	Early	TCGA-CF-A3MH-01	TCGA-CF-A3MH	II	Early	TCGA-K4-A54R-11	TCGA-K4-A54R	HC	HC
TCGA-CF-A3MI-01	TCGA-CF-A3MI	II	Early	TCGA-CF-A3MI-01	TCGA-CF-A3MI	II	Early	TCGA-CF-A3MI-01	TCGA-CF-A3MI	II	Early	TCGA-K4-A54R-01	TCGA-K4-A54R	II	Early
TCGA-CF-A47S-01	TCGA-CF-A47S	II	Early	TCGA-CF-A47S-01	TCGA-CF-A47S	II	Early	TCGA-CF-A47S-01	TCGA-CF-A47S	II	Early	TCGA-K4-A5RI-11	TCGA-K4-A5RI	HC	HC
TCGA-CF-A47T-01	TCGA-CF-A47T	II	Early	TCGA-CF-A47T-01	TCGA-CF-A47T	II	Early	TCGA-CF-A47T-01	TCGA-CF-A47T	II	Early	TCGA-K4-A5RI-01	TCGA-K4-A5RI	III	Advanced
TCGA-CF-A47V-01	TCGA-CF-A47V	II	Early	TCGA-CF-A47V-01	TCGA-CF-A47V	II	Early	TCGA-CF-A47V-01	TCGA-CF-A47V	II	Early
TCGA-CF-A47W-01	TCGA-CF-A47W	II	Early	TCGA-CF-A47W-01	TCGA-CF-A47W	II	Early	TCGA-CF-A47W-01	TCGA-CF-A47W	II	Early
TCGA-CF-A47X-01	TCGA-CF-A47X	II	Early	TCGA-CF-A47X-01	TCGA-CF-A47X	II	Early	TCGA-CF-A47X-01	TCGA-CF-A47X	II	Early
TCGA-CF-A47Y-01	TCGA-CF-A47Y	II	Early	TCGA-CF-A47Y-01	TCGA-CF-A47Y	II	Early	TCGA-CF-A47Y-01	TCGA-CF-A47Y	II	Early
TCGA-CF-A5U8-01	TCGA-CF-A5U8	II	Early	TCGA-CF-A5U8-01	TCGA-CF-A5U8	II	Early	TCGA-CF-A5U8-01	TCGA-CF-A5U8	II	Early
TCGA-CF-A5UA-01	TCGA-CF-A5UA	II	Early	TCGA-CF-A5UA-01	TCGA-CF-A5UA	II	Early	TCGA-CF-A5UA-01	TCGA-CF-A5UA	II	Early
TCGA-CF-A7I0-01	TCGA-CF-A7I0	II	Early	TCGA-CF-A7I0-01	TCGA-CF-A7I0	II	Early	TCGA-CF-A7I0-01	TCGA-CF-A7I0	II	Early
TCGA-CF-A8HX-01	TCGA-CF-A8HX	II	Early	TCGA-CF-A8HX-01	TCGA-CF-A8HX	II	Early	TCGA-CF-A8HX-01	TCGA-CF-A8HX	II	Early
TCGA-CF-A8HY-01	TCGA-CF-A8HY	II	Early	TCGA-CF-A8HY-01	TCGA-CF-A8HY	II	Early	TCGA-CF-A8HY-01	TCGA-CF-A8HY	II	Early
TCGA-CF-A9FF-01	TCGA-CF-A9FF	II	Early	TCGA-CF-A9FF-01	TCGA-CF-A9FF	II	Early	TCGA-CF-A9FF-01	TCGA-CF-A9FF	II	Early
TCGA-CF-A9FH-01	TCGA-CF-A9FH	II	Early	TCGA-CF-A9FH-01	TCGA-CF-A9FH	II	Early	TCGA-CF-A9FH-01	TCGA-CF-A9FH	II	Early
TCGA-DK-A1A5-01	TCGA-DK-A1A5	II	Early	TCGA-DK-A1A5-01	TCGA-DK-A1A5	II	Early	TCGA-DK-A1A5-01	TCGA-DK-A1A5	II	Early
TCGA-DK-A2I1-01	TCGA-DK-A2I1	II	Early	TCGA-DK-A2I1-01	TCGA-DK-A2I1	II	Early	TCGA-DK-A2I1-01	TCGA-DK-A2I1	II	Early
TCGA-DK-A3IS-01	TCGA-DK-A3IS	II	Early	TCGA-DK-A3IS-01	TCGA-DK-A3IS	II	Early	TCGA-DK-A3IS-01	TCGA-DK-A3IS	II	Early
TCGA-DK-A3IU-01	TCGA-DK-A3IU	II	Early	TCGA-DK-A3IU-01	TCGA-DK-A3IU	II	Early	TCGA-DK-A3IU-01	TCGA-DK-A3IU	II	Early
TCGA-DK-A3IV-01	TCGA-DK-A3IV	II	Early	TCGA-DK-A3IV-01	TCGA-DK-A3IV	II	Early	TCGA-DK-A3IV-01	TCGA-DK-A3IV	II	Early
TCGA-DK-A6AV-01	TCGA-DK-A6AV	II	Early	TCGA-DK-A6AV-01	TCGA-DK-A6AV	II	Early	TCGA-DK-A6AV-01	TCGA-DK-A6AV	II	Early
TCGA-DK-A6AW-01	TCGA-DK-A6AW	II	Early	TCGA-DK-A6AW-01	TCGA-DK-A6AW	II	Early	TCGA-DK-A6AW-01	TCGA-DK-A6AW	II	Early
TCGA-DK-A6B0-01	TCGA-DK-A6B0	II	Early	TCGA-DK-A6B0-01	TCGA-DK-A6B0	II	Early	TCGA-DK-A6B0-01	TCGA-DK-A6B0	II	Early
TCGA-DK-A6B1-01	TCGA-DK-A6B1	II	Early	TCGA-DK-A6B1-01	TCGA-DK-A6B1	II	Early	TCGA-DK-A6B1-01	TCGA-DK-A6B1	II	Early
TCGA-DK-A6B6-01	TCGA-DK-A6B6	II	Early	TCGA-DK-A6B6-01	TCGA-DK-A6B6	II	Early	TCGA-DK-A6B6-01	TCGA-DK-A6B6	II	Early
TCGA-DK-AA6M-01	TCGA-DK-AA6M	II	Early	TCGA-DK-AA6M-01	TCGA-DK-AA6M	II	Early	TCGA-DK-AA6M-01	TCGA-DK-AA6M	II	Early
TCGA-DK-AA6P-01	TCGA-DK-AA6P	II	Early	TCGA-DK-AA6P-01	TCGA-DK-AA6P	II	Early	TCGA-DK-AA6P-01	TCGA-DK-AA6P	II	Early
TCGA-DK-AA6T-01	TCGA-DK-AA6T	II	Early	TCGA-DK-AA6T-01	TCGA-DK-AA6T	II	Early	TCGA-DK-AA6T-01	TCGA-DK-AA6T	II	Early
TCGA-DK-AA6U-01	TCGA-DK-AA6U	II	Early	TCGA-DK-AA6U-01	TCGA-DK-AA6U	II	Early	TCGA-DK-AA6U-01	TCGA-DK-AA6U	II	Early
TCGA-DK-AA6W-01	TCGA-DK-AA6W	II	Early	TCGA-DK-AA6W-01	TCGA-DK-AA6W	II	Early	TCGA-DK-AA6W-01	TCGA-DK-AA6W	II	Early
TCGA-DK-AA6X-01	TCGA-DK-AA6X	II	Early	TCGA-DK-AA6X-01	TCGA-DK-AA6X	II	Early	TCGA-DK-AA6X-01	TCGA-DK-AA6X	II	Early
TCGA-DK-AA71-01	TCGA-DK-AA71	II	Early	TCGA-DK-AA71-01	TCGA-DK-AA71	II	Early	TCGA-DK-AA71-01	TCGA-DK-AA71	II	Early
TCGA-DK-AA76-01	TCGA-DK-AA76	II	Early	TCGA-DK-AA76-01	TCGA-DK-AA76	II	Early	TCGA-DK-AA76-01	TCGA-DK-AA76	II	Early
TCGA-DK-AA77-01	TCGA-DK-AA77	II	Early	TCGA-DK-AA77-01	TCGA-DK-AA77	II	Early	TCGA-DK-AA77-01	TCGA-DK-AA77	II	Early
TCGA-E5-A4U1-01	TCGA-E5-A4U1	II	Early	TCGA-E5-A4U1-01	TCGA-E5-A4U1	II	Early	TCGA-E5-A4U1-01	TCGA-E5-A4U1	II	Early
TCGA-E7-A3X6-01	TCGA-E7-A3X6	II	Early	TCGA-E7-A3X6-01	TCGA-E7-A3X6	II	Early	TCGA-E7-A3X6-01	TCGA-E7-A3X6	II	Early
TCGA-E7-A3Y1-01	TCGA-E7-A3Y1	II	Early	TCGA-E7-A3Y1-01	TCGA-E7-A3Y1	II	Early	TCGA-E7-A3Y1-01	TCGA-E7-A3Y1	II	Early
TCGA-E7-A4IJ-01	TCGA-E7-A4IJ	II	Early	TCGA-E7-A4IJ-01	TCGA-E7-A4IJ	II	Early	TCGA-E7-A4IJ-01	TCGA-E7-A4IJ	II	Early
TCGA-E7-A4XJ-01	TCGA-E7-A4XJ	II	Early	TCGA-E7-A4XJ-01	TCGA-E7-A4XJ	II	Early	TCGA-E7-A4XJ-01	TCGA-E7-A4XJ	II	Early
TCGA-E7-A519-01	TCGA-E7-A519	II	Early	TCGA-E7-A519-01	TCGA-E7-A519	II	Early	TCGA-E7-A519-01	TCGA-E7-A519	II	Early
TCGA-E7-A541-01	TCGA-E7-A541	II	Early	TCGA-E7-A541-01	TCGA-E7-A541	II	Early	TCGA-E7-A541-01	TCGA-E7-A541	II	Early
TCGA-E7-A5KE-01	TCGA-E7-A5KE	II	Early	TCGA-E7-A5KE-01	TCGA-E7-A5KE	II	Early	TCGA-E7-A5KE-01	TCGA-E7-A5KE	II	Early
TCGA-E7-A5KF-01	TCGA-E7-A5KF	II	Early	TCGA-E7-A5KF-01	TCGA-E7-A5KF	II	Early	TCGA-E7-A5KF-01	TCGA-E7-A5KF	II	Early
TCGA-E7-A677-01	TCGA-E7-A677	II	Early	TCGA-E7-A677-01	TCGA-E7-A677	II	Early	TCGA-E7-A677-01	TCGA-E7-A677	II	Early
TCGA-E7-A6ME-01	TCGA-E7-A6ME	II	Early	TCGA-E7-A6ME-01	TCGA-E7-A6ME	II	Early	TCGA-E7-A6ME-01	TCGA-E7-A6ME	II	Early
TCGA-E7-A6MF-01	TCGA-E7-A6MF	II	Early	TCGA-E7-A6MF-01	TCGA-E7-A6MF	II	Early	TCGA-E7-A6MF-01	TCGA-E7-A6MF	II	Early
TCGA-E7-A8O7-01	TCGA-E7-A8O7	II	Early	TCGA-E7-A8O7-01	TCGA-E7-A8O7	II	Early	TCGA-E7-A8O7-01	TCGA-E7-A8O7	II	Early
TCGA-E7-A8O8-01	TCGA-E7-A8O8	II	Early	TCGA-E7-A8O8-01	TCGA-E7-A8O8	II	Early	TCGA-E7-A8O8-01	TCGA-E7-A8O8	II	Early
TCGA-E7-A97P-01	TCGA-E7-A97P	II	Early	TCGA-E7-A97P-01	TCGA-E7-A97P	II	Early	TCGA-E7-A97P-01	TCGA-E7-A97P	II	Early
TCGA-FD-A3B6-01	TCGA-FD-A3B6	II	Early	TCGA-FD-A3B6-01	TCGA-FD-A3B6	II	Early	TCGA-FD-A3B6-01	TCGA-FD-A3B6	II	Early
TCGA-FD-A3B8-01	TCGA-FD-A3B8	II	Early	TCGA-FD-A3B8-01	TCGA-FD-A3B8	II	Early	TCGA-FD-A3B8-01	TCGA-FD-A3B8	II	Early
TCGA-FD-A3N5-01	TCGA-FD-A3N5	II	Early	TCGA-FD-A3N5-01	TCGA-FD-A3N5	II	Early	TCGA-FD-A3N5-01	TCGA-FD-A3N5	II	Early
TCGA-FD-A3N6-01	TCGA-FD-A3N6	II	Early	TCGA-FD-A3N6-01	TCGA-FD-A3N6	II	Early	TCGA-FD-A3N6-01	TCGA-FD-A3N6	II	Early
TCGA-FD-A3NA-01	TCGA-FD-A3NA	II	Early	TCGA-FD-A3NA-01	TCGA-FD-A3NA	II	Early	TCGA-FD-A3NA-01	TCGA-FD-A3NA	II	Early
TCGA-FD-A43P-01	TCGA-FD-A43P	II	Early	TCGA-FD-A43P-01	TCGA-FD-A43P	II	Early	TCGA-FD-A43P-01	TCGA-FD-A43P	II	Early
TCGA-FD-A43X-01	TCGA-FD-A43X	II	Early	TCGA-FD-A43X-01	TCGA-FD-A43X	II	Early	TCGA-FD-A43X-01	TCGA-FD-A43X	II	Early
TCGA-FD-A5BR-01	TCGA-FD-A5BR	II	Early	TCGA-FD-A5BR-01	TCGA-FD-A5BR	II	Early	TCGA-FD-A5BR-01	TCGA-FD-A5BR	II	Early
TCGA-FD-A5BU-01	TCGA-FD-A5BU	II	Early	TCGA-FD-A5BU-01	TCGA-FD-A5BU	II	Early	TCGA-FD-A5BU-01	TCGA-FD-A5BU	II	Early
TCGA-FD-A62P-01	TCGA-FD-A62P	II	Early	TCGA-FD-A62P-01	TCGA-FD-A62P	II	Early	TCGA-FD-A62P-01	TCGA-FD-A62P	II	Early
TCGA-G2-A2EC-01	TCGA-G2-A2EC	II	Early	TCGA-G2-A2EC-01	TCGA-G2-A2EC	II	Early	TCGA-G2-A2EC-01	TCGA-G2-A2EC	II	Early
TCGA-G2-A2EF-01	TCGA-G2-A2EF	II	Early	TCGA-G2-A2EF-01	TCGA-G2-A2EF	II	Early	TCGA-G2-A2EF-01	TCGA-G2-A2EF	II	Early
TCGA-G2-A2EJ-01	TCGA-G2-A2EJ	II	Early	TCGA-G2-A2EJ-01	TCGA-G2-A2EJ	II	Early	TCGA-G2-A2EJ-01	TCGA-G2-A2EJ	II	Early
TCGA-G2-A2EK-01	TCGA-G2-A2EK	II	Early	TCGA-G2-A2EK-01	TCGA-G2-A2EK	II	Early	TCGA-G2-A2EK-01	TCGA-G2-A2EK	II	Early
TCGA-G2-A2EL-01	TCGA-G2-A2EL	II	Early	TCGA-G2-A2EL-01	TCGA-G2-A2EL	II	Early	TCGA-G2-A2EL-01	TCGA-G2-A2EL	II	Early
TCGA-G2-A2ES-01	TCGA-G2-A2ES	II	Early	TCGA-G2-A2ES-01	TCGA-G2-A2ES	II	Early	TCGA-G2-A2ES-01	TCGA-G2-A2ES	II	Early
TCGA-G2-A3IB-01	TCGA-G2-A3IB	II	Early	TCGA-G2-A3IB-01	TCGA-G2-A3IB	II	Early	TCGA-G2-A3IB-01	TCGA-G2-A3IB	II	Early
TCGA-G2-A3IE-01	TCGA-G2-A3IE	II	Early	TCGA-G2-A3IE-01	TCGA-G2-A3IE	II	Early	TCGA-G2-A3IE-01	TCGA-G2-A3IE	II	Early
TCGA-G2-A3VY-01	TCGA-G2-A3VY	II	Early	TCGA-G2-A3VY-01	TCGA-G2-A3VY	II	Early	TCGA-G2-A3VY-01	TCGA-G2-A3VY	II	Early
TCGA-G2-AA3B-01	TCGA-G2-AA3B	II	Early	TCGA-G2-AA3B-01	TCGA-G2-AA3B	II	Early	TCGA-G2-AA3B-01	TCGA-G2-AA3B	II	Early
TCGA-GC-A3BM-01	TCGA-GC-A3BM	II	Early	TCGA-GC-A3BM-01	TCGA-GC-A3BM	II	Early	TCGA-GC-A3BM-01	TCGA-GC-A3BM	II	Early
TCGA-GC-A3OO-01	TCGA-GC-A3OO	II	Early	TCGA-GC-A3OO-01	TCGA-GC-A3OO	II	Early	TCGA-GC-A3OO-01	TCGA-GC-A3OO	II	Early
TCGA-GC-A3RC-01	TCGA-GC-A3RC	II	Early	TCGA-GC-A3RC-01	TCGA-GC-A3RC	II	Early	TCGA-GC-A3RC-01	TCGA-GC-A3RC	II	Early
TCGA-GC-A6I1-01	TCGA-GC-A6I1	II	Early	TCGA-GC-A6I1-01	TCGA-GC-A6I1	II	Early	TCGA-GC-A6I1-01	TCGA-GC-A6I1	II	Early
TCGA-GD-A3OS-01	TCGA-GD-A3OS	II	Early	TCGA-GD-A3OS-01	TCGA-GD-A3OS	II	Early	TCGA-GD-A3OS-01	TCGA-GD-A3OS	II	Early
TCGA-GD-A76B-01	TCGA-GD-A76B	II	Early	TCGA-GD-A76B-01	TCGA-GD-A76B	II	Early	TCGA-GD-A76B-01	TCGA-GD-A76B	II	Early
TCGA-GU-A764-01	TCGA-GU-A764	II	Early	TCGA-GU-A764-01	TCGA-GU-A764	II	Early	TCGA-GU-A764-01	TCGA-GU-A764	II	Early
TCGA-GU-A766-01	TCGA-GU-A766	II	Early	TCGA-GU-A766-01	TCGA-GU-A766	II	Early	TCGA-GU-A766-01	TCGA-GU-A766	II	Early
TCGA-GV-A3JW-01	TCGA-GV-A3JW	II	Early	TCGA-GV-A3JW-01	TCGA-GV-A3JW	II	Early	TCGA-GV-A3JW-01	TCGA-GV-A3JW	II	Early
TCGA-GV-A3QH-01	TCGA-GV-A3QH	II	Early	TCGA-GV-A3QH-01	TCGA-GV-A3QH	II	Early	TCGA-GV-A3QH-01	TCGA-GV-A3QH	II	Early
TCGA-GV-A40E-01	TCGA-GV-A40E	II	Early	TCGA-GV-A40E-01	TCGA-GV-A40E	II	Early	TCGA-GV-A40E-01	TCGA-GV-A40E	II	Early
TCGA-GV-A40G-01	TCGA-GV-A40G	II	Early	TCGA-GV-A40G-01	TCGA-GV-A40G	II	Early	TCGA-GV-A40G-01	TCGA-GV-A40G	II	Early
TCGA-GV-A6ZA-01	TCGA-GV-A6ZA	II	Early	TCGA-GV-A6ZA-01	TCGA-GV-A6ZA	II	Early	TCGA-GV-A6ZA-01	TCGA-GV-A6ZA	II	Early
TCGA-K4-A3WV-01	TCGA-K4-A3WV	II	Early	TCGA-K4-A3WV-01	TCGA-K4-A3WV	II	Early	TCGA-K4-A3WV-01	TCGA-K4-A3WV	II	Early
TCGA-K4-A4AC-01	TCGA-K4-A4AC	II	Early	TCGA-K4-A4AC-01	TCGA-K4-A4AC	II	Early	TCGA-K4-A4AC-01	TCGA-K4-A4AC	II	Early
TCGA-K4-A54R-01	TCGA-K4-A54R	II	Early	TCGA-K4-A54R-01	TCGA-K4-A54R	II	Early	TCGA-K4-A54R-01	TCGA-K4-A54R	II	Early
TCGA-K4-A5RJ-01	TCGA-K4-A5RJ	II	Early	TCGA-K4-A5RJ-01	TCGA-K4-A5RJ	II	Early	TCGA-K4-A5RJ-01	TCGA-K4-A5RJ	II	Early
TCGA-KQ-A41R-01	TCGA-KQ-A41R	II	Early	TCGA-KQ-A41R-01	TCGA-KQ-A41R	II	Early	TCGA-KQ-A41R-01	TCGA-KQ-A41R	II	Early
TCGA-LT-A5Z6-01	TCGA-LT-A5Z6	II	Early	TCGA-LT-A5Z6-01	TCGA-LT-A5Z6	II	Early	TCGA-LT-A5Z6-01	TCGA-LT-A5Z6	II	Early
TCGA-LT-A8JT-01	TCGA-LT-A8JT	II	Early	TCGA-LT-A8JT-01	TCGA-LT-A8JT	II	Early	TCGA-LT-A8JT-01	TCGA-LT-A8JT	II	Early
TCGA-PQ-A6FI-01	TCGA-PQ-A6FI	II	Early	TCGA-PQ-A6FI-01	TCGA-PQ-A6FI	II	Early	TCGA-PQ-A6FI-01	TCGA-PQ-A6FI	II	Early
TCGA-UY-A78O-01	TCGA-UY-A78O	II	Early	TCGA-UY-A78O-01	TCGA-UY-A78O	II	Early	TCGA-UY-A78O-01	TCGA-UY-A78O	II	Early
TCGA-UY-A78P-01	TCGA-UY-A78P	II	Early	TCGA-UY-A78P-01	TCGA-UY-A78P	II	Early	TCGA-UY-A78P-01	TCGA-UY-A78P	II	Early
TCGA-UY-A8OD-01	TCGA-UY-A8OD	II	Early	TCGA-UY-A8OD-01	TCGA-UY-A8OD	II	Early	TCGA-UY-A8OD-01	TCGA-UY-A8OD	II	Early
TCGA-UY-A9PH-01	TCGA-UY-A9PH	II	Early	TCGA-UY-A9PH-01	TCGA-UY-A9PH	II	Early	TCGA-UY-A9PH-01	TCGA-UY-A9PH	II	Early
TCGA-XF-A8HB-01	TCGA-XF-A8HB	II	Early	TCGA-XF-A8HB-01	TCGA-XF-A8HB	II	Early	TCGA-XF-A8HB-01	TCGA-XF-A8HB	II	Early
TCGA-XF-A9SG-01	TCGA-XF-A9SG	II	Early	TCGA-XF-A9SH-01	TCGA-XF-A9SH	II	Early	TCGA-XF-A9SH-01	TCGA-XF-A9SH	II	Early
TCGA-XF-A9SH-01	TCGA-XF-A9SH	II	Early	TCGA-XF-A9SI-01	TCGA-XF-A9SI	II	Early	TCGA-XF-A9SI-01	TCGA-XF-A9SI	II	Early
TCGA-XF-A9SI-01	TCGA-XF-A9SI	II	Early	TCGA-XF-AAME-01	TCGA-XF-AAME	II	Early	TCGA-XF-AAME-01	TCGA-XF-AAME	II	Early
TCGA-XF-AAME-01	TCGA-XF-AAME	II	Early	TCGA-XF-AAML-01	TCGA-XF-AAML	II	Early	TCGA-XF-AAML-01	TCGA-XF-AAML	II	Early
TCGA-XF-AAML-01	TCGA-XF-AAML	II	Early	TCGA-XF-AAMQ-01	TCGA-XF-AAMQ	II	Early	TCGA-XF-AAMQ-01	TCGA-XF-AAMQ	II	Early
TCGA-XF-AAMQ-01	TCGA-XF-AAMQ	II	Early	TCGA-XF-AAN2-01	TCGA-XF-AAN2	II	Early	TCGA-XF-AAN2-01	TCGA-XF-AAN2	II	Early
TCGA-XF-AAN2-01	TCGA-XF-AAN2	II	Early	TCGA-YC-A89H-01	TCGA-YC-A89H	II	Early	TCGA-YC-A89H-01	TCGA-YC-A89H	II	Early
TCGA-YC-A89H-01	TCGA-YC-A89H	II	Early	TCGA-YC-A8S6-01	TCGA-YC-A8S6	II	Early	TCGA-YC-A8S6-01	TCGA-YC-A8S6	II	Early
TCGA-YC-A8S6-01	TCGA-YC-A8S6	II	Early	TCGA-YF-AA3L-01	TCGA-YF-AA3L	II	Early	TCGA-YF-AA3L-01	TCGA-YF-AA3L	II	Early
TCGA-YF-AA3L-01	TCGA-YF-AA3L	II	Early	TCGA-YF-AA3M-01	TCGA-YF-AA3M	II	Early	TCGA-YF-AA3M-01	TCGA-YF-AA3M	II	Early
TCGA-YF-AA3M-01	TCGA-YF-AA3M	II	Early	TCGA-ZF-A9R2-01	TCGA-ZF-A9R2	II	Early	TCGA-ZF-A9R2-01	TCGA-ZF-A9R2	II	Early
TCGA-ZF-A9R2-01	TCGA-ZF-A9R2	II	Early	TCGA-ZF-A9R3-01	TCGA-ZF-A9R3	II	Early	TCGA-ZF-A9R3-01	TCGA-ZF-A9R3	II	Early
TCGA-ZF-A9R3-01	TCGA-ZF-A9R3	II	Early	TCGA-ZF-A9R4-01	TCGA-ZF-A9R4	II	Early	TCGA-ZF-A9R4-01	TCGA-ZF-A9R4	II	Early
TCGA-ZF-A9R4-01	TCGA-ZF-A9R4	II	Early	TCGA-ZF-A9R7-01	TCGA-ZF-A9R7	II	Early	TCGA-ZF-A9R7-01	TCGA-ZF-A9R7	II	Early
TCGA-ZF-A9R7-01	TCGA-ZF-A9R7	II	Early	TCGA-ZF-A9RE-01	TCGA-ZF-A9RE	II	Early	TCGA-ZF-A9RE-01	TCGA-ZF-A9RE	II	Early
TCGA-ZF-A9RE-01	TCGA-ZF-A9RE	II	Early	TCGA-ZF-A9RF-01	TCGA-ZF-A9RF	II	Early	TCGA-ZF-A9RF-01	TCGA-ZF-A9RF	II	Early
TCGA-ZF-A9RF-01	TCGA-ZF-A9RF	II	Early	TCGA-ZF-A9RL-01	TCGA-ZF-A9RL	II	Early	TCGA-ZF-A9RL-01	TCGA-ZF-A9RL	II	Early
TCGA-ZF-A9RL-01	TCGA-ZF-A9RL	II	Early	TCGA-ZF-A9RM-01	TCGA-ZF-A9RM	II	Early	TCGA-ZF-A9RM-01	TCGA-ZF-A9RM	II	Early
TCGA-ZF-A9RM-01	TCGA-ZF-A9RM	II	Early	TCGA-ZF-AA4N-01	TCGA-ZF-AA4N	II	Early	TCGA-ZF-AA4N-01	TCGA-ZF-AA4N	II	Early
TCGA-ZF-AA4N-01	TCGA-ZF-AA4N	II	Early	TCGA-ZF-AA4X-01	TCGA-ZF-AA4X	II	Early	TCGA-ZF-AA4X-01	TCGA-ZF-AA4X	II	Early
TCGA-ZF-AA4X-01	TCGA-ZF-AA4X	II	Early	TCGA-ZF-AA51-01	TCGA-ZF-AA51	II	Early	TCGA-ZF-AA51-01	TCGA-ZF-AA51	II	Early
TCGA-ZF-AA51-01	TCGA-ZF-AA51	II	Early	TCGA-ZF-AA53-01	TCGA-ZF-AA53	II	Early	TCGA-ZF-AA53-01	TCGA-ZF-AA53	II	Early
TCGA-ZF-AA53-01	TCGA-ZF-AA53	II	Early	TCGA-2F-A9KQ-01	TCGA-2F-A9KQ	III	Advanced	TCGA-2F-A9KQ-01	TCGA-2F-A9KQ	III	Advanced
TCGA-2F-A9KQ-01	TCGA-2F-A9KQ	III	Advanced	TCGA-2F-A9KR-01	TCGA-2F-A9KR	III	Advanced	TCGA-2F-A9KR-01	TCGA-2F-A9KR	III	Advanced
TCGA-2F-A9KR-01	TCGA-2F-A9KR	III	Advanced	TCGA-2F-A9KW-01	TCGA-2F-A9KW	III	Advanced	TCGA-2F-A9KW-01	TCGA-2F-A9KW	III	Advanced
TCGA-2F-A9KW-01	TCGA-2F-A9KW	III	Advanced	TCGA-4Z-AA7M-01	TCGA-4Z-AA7M	III	Advanced	TCGA-4Z-AA7M-01	TCGA-4Z-AA7M	III	Advanced
TCGA-4Z-AA7M-01	TCGA-4Z-AA7M	III	Advanced	TCGA-4Z-AA7N-01	TCGA-4Z-AA7N	III	Advanced	TCGA-4Z-AA7N-01	TCGA-4Z-AA7N	III	Advanced
TCGA-4Z-AA7N-01	TCGA-4Z-AA7N	III	Advanced	TCGA-4Z-AA7Q-01	TCGA-4Z-AA7Q	III	Advanced	TCGA-4Z-AA7Q-01	TCGA-4Z-AA7Q	III	Advanced
TCGA-4Z-AA7Q-01	TCGA-4Z-AA7Q	III	Advanced	TCGA-4Z-AA7S-01	TCGA-4Z-AA7S	III	Advanced	TCGA-4Z-AA7S-01	TCGA-4Z-AA7S	III	Advanced
TCGA-4Z-AA7S-01	TCGA-4Z-AA7S	III	Advanced	TCGA-4Z-AA87-01	TCGA-4Z-AA87	III	Advanced	TCGA-4Z-AA87-01	TCGA-4Z-AA87	III	Advanced
TCGA-4Z-AA87-01	TCGA-4Z-AA87	III	Advanced	TCGA-5N-A9KI-01	TCGA-5N-A9KI	III	Advanced	TCGA-5N-A9KI-01	TCGA-5N-A9KI	III	Advanced
TCGA-5N-A9KI-01	TCGA-5N-A9KI	III	Advanced	TCGA-5N-A9KM-01	TCGA-5N-A9KM	III	Advanced	TCGA-5N-A9KM-01	TCGA-5N-A9KM	III	Advanced
TCGA-5N-A9KM-01	TCGA-5N-A9KM	III	Advanced	TCGA-BL-A13I-01	TCGA-BL-A13I	III	Advanced	TCGA-BL-A13I-01	TCGA-BL-A13I	III	Advanced
TCGA-BL-A13I-01	TCGA-BL-A13I	III	Advanced	TCGA-BL-A3JM-01	TCGA-BL-A3JM	III	Advanced	TCGA-BL-A3JM-01	TCGA-BL-A3JM	III	Advanced
TCGA-BL-A3JM-01	TCGA-BL-A3JM	III	Advanced	TCGA-BL-A5ZZ-01	TCGA-BL-A5ZZ	III	Advanced	TCGA-BT-A0S7-01	TCGA-BT-A0S7	III	Advanced
TCGA-BT-A0S7-01	TCGA-BT-A0S7	III	Advanced	TCGA-BT-A0S7-01	TCGA-BT-A0S7	III	Advanced	TCGA-BT-A0YX-01	TCGA-BT-A0YX	III	Advanced
TCGA-BT-A0YX-01	TCGA-BT-A0YX	III	Advanced	TCGA-BT-A0YX-01	TCGA-BT-A0YX	III	Advanced	TCGA-BT-A20N-01	TCGA-BT-A20N	III	Advanced
TCGA-BT-A20N-01	TCGA-BT-A20N	III	Advanced	TCGA-BT-A20N-01	TCGA-BT-A20N	III	Advanced	TCGA-BT-A20O-01	TCGA-BT-A20O	III	Advanced
TCGA-BT-A20O-01	TCGA-BT-A20O	III	Advanced	TCGA-BT-A20O-01	TCGA-BT-A20O	III	Advanced	TCGA-BT-A20P-01	TCGA-BT-A20P	III	Advanced
TCGA-BT-A20P-01	TCGA-BT-A20P	III	Advanced	TCGA-BT-A20P-01	TCGA-BT-A20P	III	Advanced	TCGA-BT-A20U-01	TCGA-BT-A20U	III	Advanced
TCGA-BT-A20U-01	TCGA-BT-A20U	III	Advanced	TCGA-BT-A20U-01	TCGA-BT-A20U	III	Advanced	TCGA-BT-A2LA-01	TCGA-BT-A2LA	III	Advanced
TCGA-BT-A2LA-01	TCGA-BT-A2LA	III	Advanced	TCGA-BT-A2LA-01	TCGA-BT-A2LA	III	Advanced	TCGA-BT-A2LB-01	TCGA-BT-A2LB	III	Advanced
TCGA-BT-A2LB-01	TCGA-BT-A2LB	III	Advanced	TCGA-BT-A2LB-01	TCGA-BT-A2LB	III	Advanced	TCGA-BT-A3PJ-01	TCGA-BT-A3PJ	III	Advanced
TCGA-BT-A3PJ-01	TCGA-BT-A3PJ	III	Advanced	TCGA-BT-A3PJ-01	TCGA-BT-A3PJ	III	Advanced	TCGA-BT-A42E-01	TCGA-BT-A42E	III	Advanced
TCGA-BT-A42E-01	TCGA-BT-A42E	III	Advanced	TCGA-BT-A42E-01	TCGA-BT-A42E	III	Advanced	TCGA-C4-A0F1-01	TCGA-C4-A0F1	III	Advanced
TCGA-C4-A0F1-01	TCGA-C4-A0F1	III	Advanced	TCGA-C4-A0F1-01	TCGA-C4-A0F1	III	Advanced	TCGA-C4-A0F6-01	TCGA-C4-A0F6	III	Advanced
TCGA-C4-A0F6-01	TCGA-C4-A0F6	III	Advanced	TCGA-C4-A0F6-01	TCGA-C4-A0F6	III	Advanced	TCGA-CF-A1HR-01	TCGA-CF-A1HR	III	Advanced
TCGA-CF-A1HR-01	TCGA-CF-A1HR	III	Advanced	TCGA-CF-A1HR-01	TCGA-CF-A1HR	III	Advanced	TCGA-CF-A1HS-01	TCGA-CF-A1HS	III	Advanced
TCGA-CF-A1HS-01	TCGA-CF-A1HS	III	Advanced	TCGA-CF-A1HS-01	TCGA-CF-A1HS	III	Advanced	TCGA-CF-A27C-01	TCGA-CF-A27C	III	Advanced
TCGA-CF-A27C-01	TCGA-CF-A27C	III	Advanced	TCGA-CF-A27C-01	TCGA-CF-A27C	III	Advanced	TCGA-CF-A3MF-01	TCGA-CF-A3MF	III	Advanced
TCGA-CF-A3MF-01	TCGA-CF-A3MF	III	Advanced	TCGA-CF-A3MF-01	TCGA-CF-A3MF	III	Advanced	TCGA-CF-A9FL-01	TCGA-CF-A9FL	III	Advanced
TCGA-CF-A9FL-01	TCGA-CF-A9FL	III	Advanced	TCGA-CF-A9FL-01	TCGA-CF-A9FL	III	Advanced	TCGA-CU-A0YN-01	TCGA-CU-A0YN	III	Advanced
TCGA-CU-A0YN-01	TCGA-CU-A0YN	III	Advanced	TCGA-CU-A0YN-01	TCGA-CU-A0YN	III	Advanced	TCGA-CU-A3KJ-01	TCGA-CU-A3KJ	III	Advanced
TCGA-CU-A3KJ-01	TCGA-CU-A3KJ	III	Advanced	TCGA-CU-A3KJ-01	TCGA-CU-A3KJ	III	Advanced	TCGA-CU-A3YL-01	TCGA-CU-A3YL	III	Advanced
TCGA-CU-A3YL-01	TCGA-CU-A3YL	III	Advanced	TCGA-CU-A3YL-01	TCGA-CU-A3YL	III	Advanced	TCGA-CU-A5W6-01	TCGA-CU-A5W6	III	Advanced
TCGA-CU-A5W6-01	TCGA-CU-A5W6	III	Advanced	TCGA-CU-A5W6-01	TCGA-CU-A5W6	III	Advanced	TCGA-DK-A1AA-01	TCGA-DK-A1AA	III	Advanced
TCGA-DK-A1AA-01	TCGA-DK-A1AA	III	Advanced	TCGA-DK-A1AA-01	TCGA-DK-A1AA	III	Advanced	TCGA-DK-A1AC-01	TCGA-DK-A1AC	III	Advanced
TCGA-DK-A1AC-01	TCGA-DK-A1AC	III	Advanced	TCGA-DK-A1AC-01	TCGA-DK-A1AC	III	Advanced	TCGA-DK-A1AE-01	TCGA-DK-A1AE	III	Advanced
TCGA-DK-A1AE-01	TCGA-DK-A1AE	III	Advanced	TCGA-DK-A1AE-01	TCGA-DK-A1AE	III	Advanced	TCGA-DK-A1AG-01	TCGA-DK-A1AG	III	Advanced
TCGA-DK-A1AG-01	TCGA-DK-A1AG	III	Advanced	TCGA-DK-A1AG-01	TCGA-DK-A1AG	III	Advanced	TCGA-DK-A2I4-01	TCGA-DK-A2I4	III	Advanced
TCGA-DK-A2I4-01	TCGA-DK-A2I4	III	Advanced	TCGA-DK-A2I4-01	TCGA-DK-A2I4	III	Advanced	TCGA-DK-A3IM-01	TCGA-DK-A3IM	III	Advanced
TCGA-DK-A3IM-01	TCGA-DK-A3IM	III	Advanced	TCGA-DK-A3IM-01	TCGA-DK-A3IM	III	Advanced	TCGA-DK-A3IN-01	TCGA-DK-A3IN	III	Advanced
TCGA-DK-A3IN-01	TCGA-DK-A3IN	III	Advanced	TCGA-DK-A3IN-01	TCGA-DK-A3IN	III	Advanced	TCGA-DK-A3IQ-01	TCGA-DK-A3IQ	III	Advanced
TCGA-DK-A3IQ-01	TCGA-DK-A3IQ	III	Advanced	TCGA-DK-A3IQ-01	TCGA-DK-A3IQ	III	Advanced	TCGA-DK-A3IT-01	TCGA-DK-A3IT	III	Advanced
TCGA-DK-A3IT-01	TCGA-DK-A3IT	III	Advanced	TCGA-DK-A3IT-01	TCGA-DK-A3IT	III	Advanced	TCGA-DK-A3WW-01	TCGA-DK-A3WW	III	Advanced
TCGA-DK-A3WW-01	TCGA-DK-A3WW	III	Advanced	TCGA-DK-A3WW-01	TCGA-DK-A3WW	III	Advanced	TCGA-DK-A3WX-01	TCGA-DK-A3WX	III	Advanced
TCGA-DK-A3WX-01	TCGA-DK-A3WX	III	Advanced	TCGA-DK-A3WX-01	TCGA-DK-A3WX	III	Advanced	TCGA-DK-A3WY-01	TCGA-DK-A3WY	III	Advanced
TCGA-DK-A3WY-01	TCGA-DK-A3WY	III	Advanced	TCGA-DK-A3WY-01	TCGA-DK-A3WY	III	Advanced	TCGA-DK-A3X1-01	TCGA-DK-A3X1	III	Advanced
TCGA-DK-A3X1-01	TCGA-DK-A3X1	III	Advanced	TCGA-DK-A3X1-01	TCGA-DK-A3X1	III	Advanced	TCGA-DK-AA6S-01	TCGA-DK-AA6S	III	Advanced
TCGA-DK-AA6S-01	TCGA-DK-AA6S	III	Advanced	TCGA-DK-AA6S-01	TCGA-DK-AA6S	III	Advanced	TCGA-DK-AA74-01	TCGA-DK-AA74	III	Advanced
TCGA-DK-AA74-01	TCGA-DK-AA74	III	Advanced	TCGA-DK-AA74-01	TCGA-DK-AA74	III	Advanced	TCGA-DK-AA75-01	TCGA-DK-AA75	III	Advanced
TCGA-DK-AA75-01	TCGA-DK-AA75	III	Advanced	TCGA-DK-AA75-01	TCGA-DK-AA75	III	Advanced	TCGA-E7-A678-01	TCGA-E7-A678	III	Advanced
TCGA-E7-A678-01	TCGA-E7-A678	III	Advanced	TCGA-E7-A678-01	TCGA-E7-A678	III	Advanced	TCGA-E7-A7DU-01	TCGA-E7-A7DU	III	Advanced
TCGA-E7-A7DU-01	TCGA-E7-A7DU	III	Advanced	TCGA-E7-A7DU-01	TCGA-E7-A7DU	III	Advanced	TCGA-E7-A7PW-01	TCGA-E7-A7PW	III	Advanced
TCGA-E7-A7PW-01	TCGA-E7-A7PW	III	Advanced	TCGA-E7-A7PW-01	TCGA-E7-A7PW	III	Advanced	TCGA-E7-A7XN-01	TCGA-E7-A7XN	III	Advanced
TCGA-E7-A7XN-01	TCGA-E7-A7XN	III	Advanced	TCGA-E7-A7XN-01	TCGA-E7-A7XN	III	Advanced	TCGA-E7-A85H-01	TCGA-E7-A85H	III	Advanced
TCGA-E7-A85H-01	TCGA-E7-A85H	III	Advanced	TCGA-E7-A85H-01	TCGA-E7-A85H	III	Advanced	TCGA-FD-A3B3-01	TCGA-FD-A3B3	III	Advanced
TCGA-FD-A3B3-01	TCGA-FD-A3B3	III	Advanced	TCGA-FD-A3B3-01	TCGA-FD-A3B3	III	Advanced	TCGA-FD-A3B4-01	TCGA-FD-A3B4	III	Advanced
TCGA-FD-A3B4-01	TCGA-FD-A3B4	III	Advanced	TCGA-FD-A3B4-01	TCGA-FD-A3B4	III	Advanced	TCGA-FD-A3B7-01	TCGA-FD-A3B7	III	Advanced
TCGA-FD-A3B7-01	TCGA-FD-A3B7	III	Advanced	TCGA-FD-A3B7-01	TCGA-FD-A3B7	III	Advanced	TCGA-FD-A3SN-01	TCGA-FD-A3SN	III	Advanced
TCGA-FD-A3SN-01	TCGA-FD-A3SN	III	Advanced	TCGA-FD-A3SN-01	TCGA-FD-A3SN	III	Advanced	TCGA-FD-A3SP-01	TCGA-FD-A3SP	III	Advanced
TCGA-FD-A3SP-01	TCGA-FD-A3SP	III	Advanced	TCGA-FD-A3SP-01	TCGA-FD-A3SP	III	Advanced	TCGA-FD-A43N-01	TCGA-FD-A43N	III	Advanced
TCGA-FD-A43N-01	TCGA-FD-A43N	III	Advanced	TCGA-FD-A43N-01	TCGA-FD-A43N	III	Advanced	TCGA-FD-A43S-01	TCGA-FD-A43S	III	Advanced
TCGA-FD-A43S-01	TCGA-FD-A43S	III	Advanced	TCGA-FD-A43S-01	TCGA-FD-A43S	III	Advanced	TCGA-FD-A43Y-01	TCGA-FD-A43Y	III	Advanced
TCGA-FD-A43Y-01	TCGA-FD-A43Y	III	Advanced	TCGA-FD-A43Y-01	TCGA-FD-A43Y	III	Advanced	TCGA-FD-A5BS-01	TCGA-FD-A5BS	III	Advanced
TCGA-FD-A5BS-01	TCGA-FD-A5BS	III	Advanced	TCGA-FD-A5BS-01	TCGA-FD-A5BS	III	Advanced	TCGA-FD-A5BT-01	TCGA-FD-A5BT	III	Advanced
TCGA-FD-A5BT-01	TCGA-FD-A5BT	III	Advanced	TCGA-FD-A5BT-01	TCGA-FD-A5BT	III	Advanced	TCGA-FD-A5BV-01	TCGA-FD-A5BV	III	Advanced
TCGA-FD-A5BV-01	TCGA-FD-A5BV	III	Advanced	TCGA-FD-A5BV-01	TCGA-FD-A5BV	III	Advanced	TCGA-FD-A5BY-01	TCGA-FD-A5BY	III	Advanced
TCGA-FD-A5BY-01	TCGA-FD-A5BY	III	Advanced	TCGA-FD-A5BY-01	TCGA-FD-A5BY	III	Advanced	TCGA-FD-A5C1-01	TCGA-FD-A5C1	III	Advanced
TCGA-FD-A5C1-01	TCGA-FD-A5C1	III	Advanced	TCGA-FD-A5C1-01	TCGA-FD-A5C1	III	Advanced	TCGA-FD-A62N-01	TCGA-FD-A62N	III	Advanced
TCGA-FD-A62N-01	TCGA-FD-A62N	III	Advanced	TCGA-FD-A62N-01	TCGA-FD-A62N	III	Advanced	TCGA-FD-A62S-01	TCGA-FD-A62S	III	Advanced
TCGA-FD-A62S-01	TCGA-FD-A62S	III	Advanced	TCGA-FD-A62S-01	TCGA-FD-A62S	III	Advanced	TCGA-FD-A6TB-01	TCGA-FD-A6TB	III	Advanced
TCGA-FD-A6TB-01	TCGA-FD-A6TB	III	Advanced	TCGA-FD-A6TB-01	TCGA-FD-A6TB	III	Advanced	TCGA-FD-A6TC-01	TCGA-FD-A6TC	III	Advanced
TCGA-FD-A6TC-01	TCGA-FD-A6TC	III	Advanced	TCGA-FD-A6TC-01	TCGA-FD-A6TC	III	Advanced	TCGA-FD-A6TD-01	TCGA-FD-A6TD	III	Advanced
TCGA-FD-A6TD-01	TCGA-FD-A6TD	III	Advanced	TCGA-FD-A6TD-01	TCGA-FD-A6TD	III	Advanced	TCGA-FD-A6TK-01	TCGA-FD-A6TK	III	Advanced
TCGA-FD-A6TK-01	TCGA-FD-A6TK	III	Advanced	TCGA-FD-A6TK-01	TCGA-FD-A6TK	III	Advanced	TCGA-FJ-A3ZF-01	TCGA-FJ-A3ZF	III	Advanced
TCGA-FJ-A3ZF-01	TCGA-FJ-A3ZF	III	Advanced	TCGA-FJ-A3ZF-01	TCGA-FJ-A3ZF	III	Advanced	TCGA-FJ-A871-01	TCGA-FJ-A871	III	Advanced
TCGA-FJ-A871-01	TCGA-FJ-A871	III	Advanced	TCGA-FJ-A871-01	TCGA-FJ-A871	III	Advanced	TCGA-FT-A3EE-01	TCGA-FT-A3EE	III	Advanced
TCGA-FT-A3EE-01	TCGA-FT-A3EE	III	Advanced	TCGA-FT-A3EE-01	TCGA-FT-A3EE	III	Advanced	TCGA-G2-A2EO-01	TCGA-G2-A2EO	III	Advanced
TCGA-G2-A2EO-01	TCGA-G2-A2EO	III	Advanced	TCGA-G2-A2EO-01	TCGA-G2-A2EO	III	Advanced	TCGA-GC-A3I6-01	TCGA-GC-A3I6	III	Advanced
TCGA-GC-A3I6-01	TCGA-GC-A3I6	III	Advanced	TCGA-GC-A3I6-01	TCGA-GC-A3I6	III	Advanced	TCGA-GC-A3RB-01	TCGA-GC-A3RB	III	Advanced
TCGA-GC-A3RB-01	TCGA-GC-A3RB	III	Advanced	TCGA-GC-A3RB-01	TCGA-GC-A3RB	III	Advanced	TCGA-GC-A3RD-01	TCGA-GC-A3RD	III	Advanced
TCGA-GC-A3RD-01	TCGA-GC-A3RD	III	Advanced	TCGA-GC-A3RD-01	TCGA-GC-A3RD	III	Advanced	TCGA-GC-A3WC-01	TCGA-GC-A3WC	III	Advanced
TCGA-GC-A3WC-01	TCGA-GC-A3WC	III	Advanced	TCGA-GC-A3WC-01	TCGA-GC-A3WC	III	Advanced	TCGA-GC-A4ZW-01	TCGA-GC-A4ZW	III	Advanced
TCGA-GC-A4ZW-01	TCGA-GC-A4ZW	III	Advanced	TCGA-GC-A4ZW-01	TCGA-GC-A4ZW	III	Advanced	TCGA-GD-A6C6-01	TCGA-GD-A6C6	III	Advanced
TCGA-GD-A6C6-01	TCGA-GD-A6C6	III	Advanced	TCGA-GD-A6C6-01	TCGA-GD-A6C6	III	Advanced	TCGA-GU-A42Q-01	TCGA-GU-A42Q	III	Advanced
TCGA-GU-A42Q-01	TCGA-GU-A42Q	III	Advanced	TCGA-GU-A42Q-01	TCGA-GU-A42Q	III	Advanced	TCGA-GU-A763-01	TCGA-GU-A763	III	Advanced
TCGA-GU-A763-01	TCGA-GU-A763	III	Advanced	TCGA-GU-A763-01	TCGA-GU-A763	III	Advanced	TCGA-GU-AATQ-01	TCGA-GU-AATQ	III	Advanced
TCGA-GU-AATQ-01	TCGA-GU-AATQ	III	Advanced	TCGA-GU-AATQ-01	TCGA-GU-AATQ	III	Advanced	TCGA-GV-A3JX-01	TCGA-GV-A3JX	III	Advanced
TCGA-GV-A3JX-01	TCGA-GV-A3JX	III	Advanced	TCGA-GV-A3JX-01	TCGA-GV-A3JX	III	Advanced	TCGA-GV-A3QI-01	TCGA-GV-A3QI	III	Advanced
TCGA-GV-A3QI-01	TCGA-GV-A3QI	III	Advanced	TCGA-GV-A3QI-01	TCGA-GV-A3QI	III	Advanced	TCGA-H4-A2HO-01	TCGA-H4-A2HO	III	Advanced
TCGA-H4-A2HO-01	TCGA-H4-A2HO	III	Advanced	TCGA-H4-A2HO-01	TCGA-H4-A2HO	III	Advanced	TCGA-HQ-A2OF-01	TCGA-HQ-A2OF	III	Advanced
TCGA-HQ-A2OF-01	TCGA-HQ-A2OF	III	Advanced	TCGA-HQ-A2OF-01	TCGA-HQ-A2OF	III	Advanced	TCGA-HQ-A5NE-01	TCGA-HQ-A5NE	III	Advanced
TCGA-HQ-A5NE-01	TCGA-HQ-A5NE	III	Advanced	TCGA-HQ-A5NE-01	TCGA-HQ-A5NE	III	Advanced	TCGA-K4-A3WS-01	TCGA-K4-A3WS	III	Advanced
TCGA-K4-A3WS-01	TCGA-K4-A3WS	III	Advanced	TCGA-K4-A3WS-01	TCGA-K4-A3WS	III	Advanced	TCGA-K4-A3WU-01	TCGA-K4-A3WU	III	Advanced
TCGA-K4-A3WU-01	TCGA-K4-A3WU	III	Advanced	TCGA-K4-A3WU-01	TCGA-K4-A3WU	III	Advanced	TCGA-K4-A4AB-01	TCGA-K4-A4AB	III	Advanced
TCGA-K4-A4AB-01	TCGA-K4-A4AB	III	Advanced	TCGA-K4-A4AB-01	TCGA-K4-A4AB	III	Advanced	TCGA-K4-A5RH-01	TCGA-K4-A5RH	III	Advanced
TCGA-K4-A5RH-01	TCGA-K4-A5RH	III	Advanced	TCGA-K4-A5RH-01	TCGA-K4-A5RH	III	Advanced	TCGA-K4-A5RI-01	TCGA-K4-A5RI	III	Advanced
TCGA-K4-A5RI-01	TCGA-K4-A5RI	III	Advanced	TCGA-K4-A5RI-01	TCGA-K4-A5RI	III	Advanced	TCGA-K4-A6FZ-01	TCGA-K4-A6FZ	III	Advanced
TCGA-K4-A6FZ-01	TCGA-K4-A6FZ	III	Advanced	TCGA-K4-A6FZ-01	TCGA-K4-A6FZ	III	Advanced	TCGA-K4-AAQO-01	TCGA-K4-AAQO	III	Advanced
TCGA-K4-AAQO-01	TCGA-K4-AAQO	III	Advanced	TCGA-K4-AAQO-01	TCGA-K4-AAQO	III	Advanced	TCGA-KQ-A41N-01	TCGA-KQ-A41N	III	Advanced
TCGA-KQ-A41N-01	TCGA-KQ-A41N	III	Advanced	TCGA-KQ-A41N-01	TCGA-KQ-A41N	III	Advanced	TCGA-KQ-A41Q-01	TCGA-KQ-A41Q	III	Advanced
TCGA-KQ-A41Q-01	TCGA-KQ-A41Q	III	Advanced	TCGA-KQ-A41Q-01	TCGA-KQ-A41Q	III	Advanced	TCGA-KQ-A41S-01	TCGA-KQ-A41S	III	Advanced
TCGA-KQ-A41S-01	TCGA-KQ-A41S	III	Advanced	TCGA-KQ-A41S-01	TCGA-KQ-A41S	III	Advanced	TCGA-MV-A51V-01	TCGA-MV-A51V	III	Advanced
TCGA-MV-A51V-01	TCGA-MV-A51V	III	Advanced	TCGA-MV-A51V-01	TCGA-MV-A51V	III	Advanced	TCGA-PQ-A6FN-01	TCGA-PQ-A6FN	III	Advanced
TCGA-PQ-A6FN-01	TCGA-PQ-A6FN	III	Advanced	TCGA-PQ-A6FN-01	TCGA-PQ-A6FN	III	Advanced	TCGA-R3-A69X-01	TCGA-R3-A69X	III	Advanced
TCGA-R3-A69X-01	TCGA-R3-A69X	III	Advanced	TCGA-R3-A69X-01	TCGA-R3-A69X	III	Advanced	TCGA-S5-AA26-01	TCGA-S5-AA26	III	Advanced
TCGA-S5-AA26-01	TCGA-S5-AA26	III	Advanced	TCGA-S5-AA26-01	TCGA-S5-AA26	III	Advanced	TCGA-SY-A9G5-01	TCGA-SY-A9G5	III	Advanced
TCGA-SY-A9G5-01	TCGA-SY-A9G5	III	Advanced	TCGA-SY-A9G5-01	TCGA-SY-A9G5	III	Advanced	TCGA-UY-A9PA-01	TCGA-UY-A9PA	III	Advanced
TCGA-UY-A9PA-01	TCGA-UY-A9PA	III	Advanced	TCGA-UY-A9PA-01	TCGA-UY-A9PA	III	Advanced	TCGA-UY-A9PB-01	TCGA-UY-A9PB	III	Advanced
TCGA-UY-A9PB-01	TCGA-UY-A9PB	III	Advanced	TCGA-UY-A9PB-01	TCGA-UY-A9PB	III	Advanced	TCGA-UY-A9PD-01	TCGA-UY-A9PD	III	Advanced
TCGA-UY-A9PD-01	TCGA-UY-A9PD	III	Advanced	TCGA-UY-A9PD-01	TCGA-UY-A9PD	III	Advanced	TCGA-XF-A8HD-01	TCGA-XF-A8HD	III	Advanced
TCGA-XF-A8HD-01	TCGA-XF-A8HD	III	Advanced	TCGA-XF-A8HD-01	TCGA-XF-A8HD	III	Advanced	TCGA-XF-A8HE-01	TCGA-XF-A8HE	III	Advanced
TCGA-XF-A8HE-01	TCGA-XF-A8HE	III	Advanced	TCGA-XF-A8HE-01	TCGA-XF-A8HE	III	Advanced	TCGA-XF-A8HF-01	TCGA-XF-A8HF	III	Advanced
TCGA-XF-A8HF-01	TCGA-XF-A8HF	III	Advanced	TCGA-XF-A8HF-01	TCGA-XF-A8HF	III	Advanced	TCGA-XF-A8HG-01	TCGA-XF-A8HG	III	Advanced
TCGA-XF-A8HG-01	TCGA-XF-A8HG	III	Advanced	TCGA-XF-A8HG-01	TCGA-XF-A8HG	III	Advanced	TCGA-XF-A9SM-01	TCGA-XF-A9SM	III	Advanced
TCGA-XF-A9SM-01	TCGA-XF-A9SM	III	Advanced	TCGA-XF-A9SM-01	TCGA-XF-A9SM	III	Advanced	TCGA-XF-A9SP-01	TCGA-XF-A9SP	III	Advanced
TCGA-XF-A9SP-01	TCGA-XF-A9SP	III	Advanced	TCGA-XF-A9SP-01	TCGA-XF-A9SP	III	Advanced	TCGA-XF-A9T0-01	TCGA-XF-A9T0	III	Advanced
TCGA-XF-A9T0-01	TCGA-XF-A9T0	III	Advanced	TCGA-XF-A9ST-01	TCGA-XF-A9ST	III	Advanced	TCGA-XF-A9T2-01	TCGA-XF-A9T2	III	Advanced
TCGA-XF-A9T2-01	TCGA-XF-A9T2	III	Advanced	TCGA-XF-A9T0-01	TCGA-XF-A9T0	III	Advanced	TCGA-XF-A9T6-01	TCGA-XF-A9T6	III	Advanced
TCGA-XF-A9T6-01	TCGA-XF-A9T6	III	Advanced	TCGA-XF-A9T2-01	TCGA-XF-A9T2	III	Advanced	TCGA-XF-A9T8-01	TCGA-XF-A9T8	III	Advanced
TCGA-XF-A9T8-01	TCGA-XF-A9T8	III	Advanced	TCGA-XF-A9T6-01	TCGA-XF-A9T6	III	Advanced	TCGA-XF-AAMG-01	TCGA-XF-AAMG	III	Advanced
TCGA-XF-AAMG-01	TCGA-XF-AAMG	III	Advanced	TCGA-XF-A9T8-01	TCGA-XF-A9T8	III	Advanced	TCGA-XF-AAMJ-01	TCGA-XF-AAMJ	III	Advanced
TCGA-XF-AAMJ-01	TCGA-XF-AAMJ	III	Advanced	TCGA-XF-AAMG-01	TCGA-XF-AAMG	III	Advanced	TCGA-XF-AAMR-01	TCGA-XF-AAMR	III	Advanced
TCGA-XF-AAMR-01	TCGA-XF-AAMR	III	Advanced	TCGA-XF-AAMJ-01	TCGA-XF-AAMJ	III	Advanced	TCGA-XF-AAMX-01	TCGA-XF-AAMX	III	Advanced
TCGA-XF-AAMX-01	TCGA-XF-AAMX	III	Advanced	TCGA-XF-AAMR-01	TCGA-XF-AAMR	III	Advanced	TCGA-XF-AAMY-01	TCGA-XF-AAMY	III	Advanced
TCGA-XF-AAMY-01	TCGA-XF-AAMY	III	Advanced	TCGA-XF-AAMX-01	TCGA-XF-AAMX	III	Advanced	TCGA-XF-AAN1-01	TCGA-XF-AAN1	III	Advanced
TCGA-XF-AAN1-01	TCGA-XF-AAN1	III	Advanced	TCGA-XF-AAMY-01	TCGA-XF-AAMY	III	Advanced	TCGA-XF-AAN4-01	TCGA-XF-AAN4	III	Advanced
TCGA-XF-AAN4-01	TCGA-XF-AAN4	III	Advanced	TCGA-XF-AAN1-01	TCGA-XF-AAN1	III	Advanced	TCGA-XF-AAN5-01	TCGA-XF-AAN5	III	Advanced
TCGA-XF-AAN5-01	TCGA-XF-AAN5	III	Advanced	TCGA-XF-AAN4-01	TCGA-XF-AAN4	III	Advanced	TCGA-XF-AAN8-01	TCGA-XF-AAN8	III	Advanced
TCGA-XF-AAN8-01	TCGA-XF-AAN8	III	Advanced	TCGA-XF-AAN5-01	TCGA-XF-AAN5	III	Advanced	TCGA-ZF-A9R0-01	TCGA-ZF-A9R0	III	Advanced
TCGA-ZF-A9R0-01	TCGA-ZF-A9R0	III	Advanced	TCGA-XF-AAN8-01	TCGA-XF-AAN8	III	Advanced	TCGA-ZF-A9R5-01	TCGA-ZF-A9R5	III	Advanced
TCGA-ZF-A9R5-01	TCGA-ZF-A9R5	III	Advanced	TCGA-ZF-A9R0-01	TCGA-ZF-A9R0	III	Advanced	TCGA-ZF-A9RC-01	TCGA-ZF-A9RC	III	Advanced
TCGA-ZF-A9RC-01	TCGA-ZF-A9RC	III	Advanced	TCGA-ZF-A9R5-01	TCGA-ZF-A9R5	III	Advanced	TCGA-ZF-A9RN-01	TCGA-ZF-A9RN	III	Advanced
TCGA-ZF-A9RG-01	TCGA-ZF-A9RG	III	Advanced	TCGA-ZF-A9RC-01	TCGA-ZF-A9RC	III	Advanced	TCGA-ZF-AA4U-01	TCGA-ZF-AA4U	III	Advanced
TCGA-ZF-A9RN-01	TCGA-ZF-A9RN	III	Advanced	TCGA-ZF-A9RN-01	TCGA-ZF-A9RN	III	Advanced	TCGA-ZF-AA4V-01	TCGA-ZF-AA4V	III	Advanced
TCGA-ZF-AA4U-01	TCGA-ZF-AA4U	III	Advanced	TCGA-ZF-AA4U-01	TCGA-ZF-AA4U	III	Advanced	TCGA-ZF-AA4W-01	TCGA-ZF-AA4W	III	Advanced
TCGA-ZF-AA4V-01	TCGA-ZF-AA4V	III	Advanced	TCGA-ZF-AA4V-01	TCGA-ZF-AA4V	III	Advanced	TCGA-ZF-AA52-01	TCGA-ZF-AA52	III	Advanced
TCGA-ZF-AA4W-01	TCGA-ZF-AA4W	III	Advanced	TCGA-ZF-AA4W-01	TCGA-ZF-AA4W	III	Advanced	TCGA-ZF-AA54-01	TCGA-ZF-AA54	III	Advanced
TCGA-ZF-AA52-01	TCGA-ZF-AA52	III	Advanced	TCGA-ZF-AA52-01	TCGA-ZF-AA52	III	Advanced	TCGA-ZF-AA56-01	TCGA-ZF-AA56	III	Advanced
TCGA-ZF-AA54-01	TCGA-ZF-AA54	III	Advanced	TCGA-ZF-AA54-01	TCGA-ZF-AA54	III	Advanced	TCGA-2F-A9KO-01	TCGA-2F-A9KO	IV	Advanced
TCGA-ZF-AA56-01	TCGA-ZF-AA56	III	Advanced	TCGA-ZF-AA56-01	TCGA-ZF-AA56	III	Advanced	TCGA-2F-A9KP-01	TCGA-2F-A9KP	IV	Advanced
TCGA-2F-A9KO-01	TCGA-2F-A9KO	IV	Advanced	TCGA-2F-A9KO-01	TCGA-2F-A9KO	IV	Advanced	TCGA-4Z-AA7R-01	TCGA-4Z-AA7R	IV	Advanced
TCGA-2F-A9KP-01	TCGA-2F-A9KP	IV	Advanced	TCGA-2F-A9KP-01	TCGA-2F-A9KP	IV	Advanced	TCGA-4Z-AA82-01	TCGA-4Z-AA82	IV	Advanced
TCGA-4Z-AA7R-01	TCGA-4Z-AA7R	IV	Advanced	TCGA-4Z-AA7R-01	TCGA-4Z-AA7R	IV	Advanced	TCGA-4Z-AA84-01	TCGA-4Z-AA84	IV	Advanced
TCGA-4Z-AA82-01	TCGA-4Z-AA82	IV	Advanced	TCGA-4Z-AA82-01	TCGA-4Z-AA82	IV	Advanced	TCGA-4Z-AA86-01	TCGA-4Z-AA86	IV	Advanced
TCGA-4Z-AA84-01	TCGA-4Z-AA84	IV	Advanced	TCGA-4Z-AA84-01	TCGA-4Z-AA84	IV	Advanced	TCGA-4Z-AA89-01	TCGA-4Z-AA89	IV	Advanced
TCGA-4Z-AA86-01	TCGA-4Z-AA86	IV	Advanced	TCGA-4Z-AA86-01	TCGA-4Z-AA86	IV	Advanced	TCGA-BL-A13J-01	TCGA-BL-A13J	IV	Advanced
TCGA-4Z-AA89-01	TCGA-4Z-AA89	IV	Advanced	TCGA-4Z-AA89-01	TCGA-4Z-AA89	IV	Advanced	TCGA-BT-A20Q-01	TCGA-BT-A20Q	IV	Advanced
TCGA-BL-A13J-01	TCGA-BL-A13J	IV	Advanced	TCGA-BL-A13J-01	TCGA-BL-A13J	IV	Advanced	TCGA-BT-A20R-01	TCGA-BT-A20R	IV	Advanced
TCGA-BT-A20Q-01	TCGA-BT-A20Q	IV	Advanced	TCGA-BT-A20Q-01	TCGA-BT-A20Q	IV	Advanced	TCGA-BT-A20T-01	TCGA-BT-A20T	IV	Advanced
TCGA-BT-A20R-01	TCGA-BT-A20R	IV	Advanced	TCGA-BT-A20R-01	TCGA-BT-A20R	IV	Advanced	TCGA-BT-A20V-01	TCGA-BT-A20V	IV	Advanced
TCGA-BT-A20T-01	TCGA-BT-A20T	IV	Advanced	TCGA-BT-A20T-01	TCGA-BT-A20T	IV	Advanced	TCGA-BT-A20X-01	TCGA-BT-A20X	IV	Advanced
TCGA-BT-A20V-01	TCGA-BT-A20V	IV	Advanced	TCGA-BT-A20V-01	TCGA-BT-A20V	IV	Advanced	TCGA-BT-A2LD-01	TCGA-BT-A2LD	IV	Advanced
TCGA-BT-A20X-01	TCGA-BT-A20X	IV	Advanced	TCGA-BT-A20X-01	TCGA-BT-A20X	IV	Advanced	TCGA-BT-A3PH-01	TCGA-BT-A3PH	IV	Advanced
TCGA-BT-A2LD-01	TCGA-BT-A2LD	IV	Advanced	TCGA-BT-A2LD-01	TCGA-BT-A2LD	IV	Advanced	TCGA-BT-A42F-01	TCGA-BT-A42F	IV	Advanced
TCGA-BT-A3PH-01	TCGA-BT-A3PH	IV	Advanced	TCGA-BT-A3PH-01	TCGA-BT-A3PH	IV	Advanced	TCGA-C4-A0EZ-01	TCGA-C4-A0EZ	IV	Advanced
TCGA-BT-A42B-01	TCGA-BT-A42B	IV	Advanced	TCGA-BT-A42F-01	TCGA-BT-A42F	IV	Advanced	TCGA-C4-A0F7-01	TCGA-C4-A0F7	IV	Advanced
TCGA-BT-A42F-01	TCGA-BT-A42F	IV	Advanced	TCGA-C4-A0EZ-01	TCGA-C4-A0EZ	IV	Advanced	TCGA-CU-A0YO-01	TCGA-CU-A0YO	IV	Advanced
TCGA-C4-A0EZ-01	TCGA-C4-A0EZ	IV	Advanced	TCGA-C4-A0F7-01	TCGA-C4-A0F7	IV	Advanced	TCGA-CU-A0YR-01	TCGA-CU-A0YR	IV	Advanced
TCGA-C4-A0F7-01	TCGA-C4-A0F7	IV	Advanced	TCGA-CU-A0YO-01	TCGA-CU-A0YO	IV	Advanced	TCGA-CU-A3QU-01	TCGA-CU-A3QU	IV	Advanced
TCGA-CU-A0YO-01	TCGA-CU-A0YO	IV	Advanced	TCGA-CU-A0YR-01	TCGA-CU-A0YR	IV	Advanced	TCGA-CU-A72E-01	TCGA-CU-A72E	IV	Advanced
TCGA-CU-A0YR-01	TCGA-CU-A0YR	IV	Advanced	TCGA-CU-A3QU-01	TCGA-CU-A3QU	IV	Advanced	TCGA-DK-A1A3-01	TCGA-DK-A1A3	IV	Advanced
TCGA-CU-A3QU-01	TCGA-CU-A3QU	IV	Advanced	TCGA-CU-A72E-01	TCGA-CU-A72E	IV	Advanced	TCGA-DK-A1A6-01	TCGA-DK-A1A6	IV	Advanced
TCGA-CU-A72E-01	TCGA-CU-A72E	IV	Advanced	TCGA-DK-A1A3-01	TCGA-DK-A1A3	IV	Advanced	TCGA-DK-A1A7-01	TCGA-DK-A1A7	IV	Advanced
TCGA-DK-A1A3-01	TCGA-DK-A1A3	IV	Advanced	TCGA-DK-A1A6-01	TCGA-DK-A1A6	IV	Advanced	TCGA-DK-A1AB-01	TCGA-DK-A1AB	IV	Advanced
TCGA-DK-A1A6-01	TCGA-DK-A1A6	IV	Advanced	TCGA-DK-A1A7-01	TCGA-DK-A1A7	IV	Advanced	TCGA-DK-A1AD-01	TCGA-DK-A1AD	IV	Advanced
TCGA-DK-A1A7-01	TCGA-DK-A1A7	IV	Advanced	TCGA-DK-A1AB-01	TCGA-DK-A1AB	IV	Advanced	TCGA-DK-A1AF-01	TCGA-DK-A1AF	IV	Advanced
TCGA-DK-A1AB-01	TCGA-DK-A1AB	IV	Advanced	TCGA-DK-A1AD-01	TCGA-DK-A1AD	IV	Advanced	TCGA-DK-A2HX-01	TCGA-DK-A2HX	IV	Advanced
TCGA-DK-A1AD-01	TCGA-DK-A1AD	IV	Advanced	TCGA-DK-A1AF-01	TCGA-DK-A1AF	IV	Advanced	TCGA-DK-A2I2-01	TCGA-DK-A2I2	IV	Advanced
TCGA-DK-A1AF-01	TCGA-DK-A1AF	IV	Advanced	TCGA-DK-A2HX-01	TCGA-DK-A2HX	IV	Advanced	TCGA-DK-A2I6-01	TCGA-DK-A2I6	IV	Advanced
TCGA-DK-A2HX-01	TCGA-DK-A2HX	IV	Advanced	TCGA-DK-A2I2-01	TCGA-DK-A2I2	IV	Advanced	TCGA-DK-A3IK-01	TCGA-DK-A3IK	IV	Advanced
TCGA-DK-A2I2-01	TCGA-DK-A2I2	IV	Advanced	TCGA-DK-A2I6-01	TCGA-DK-A2I6	IV	Advanced	TCGA-DK-A3IL-01	TCGA-DK-A3IL	IV	Advanced
TCGA-DK-A2I6-01	TCGA-DK-A2I6	IV	Advanced	TCGA-DK-A3IK-01	TCGA-DK-A3IK	IV	Advanced	TCGA-DK-A3X2-01	TCGA-DK-A3X2	IV	Advanced
TCGA-DK-A3IK-01	TCGA-DK-A3IK	IV	Advanced	TCGA-DK-A3IL-01	TCGA-DK-A3IL	IV	Advanced	TCGA-DK-A6B2-01	TCGA-DK-A6B2	IV	Advanced
TCGA-DK-A3IL-01	TCGA-DK-A3IL	IV	Advanced	TCGA-DK-A3X2-01	TCGA-DK-A3X2	IV	Advanced	TCGA-DK-A6B5-01	TCGA-DK-A6B5	IV	Advanced
TCGA-DK-A3X2-01	TCGA-DK-A3X2	IV	Advanced	TCGA-DK-A6B2-01	TCGA-DK-A6B2	IV	Advanced	TCGA-DK-AA6L-01	TCGA-DK-AA6L	IV	Advanced
TCGA-DK-A6B2-01	TCGA-DK-A6B2	IV	Advanced	TCGA-DK-A6B5-01	TCGA-DK-A6B5	IV	Advanced	TCGA-DK-AA6Q-01	TCGA-DK-AA6Q	IV	Advanced
TCGA-DK-A6B5-01	TCGA-DK-A6B5	IV	Advanced	TCGA-DK-AA6L-01	TCGA-DK-AA6L	IV	Advanced	TCGA-DK-AA6R-01	TCGA-DK-AA6R	IV	Advanced
TCGA-DK-AA6L-01	TCGA-DK-AA6L	IV	Advanced	TCGA-DK-AA6Q-01	TCGA-DK-AA6Q	IV	Advanced	TCGA-E5-A2PC-01	TCGA-E5-A2PC	IV	Advanced
TCGA-DK-AA6Q-01	TCGA-DK-AA6Q	IV	Advanced	TCGA-DK-AA6R-01	TCGA-DK-AA6R	IV	Advanced	TCGA-E5-A4TZ-01	TCGA-E5-A4TZ	IV	Advanced
TCGA-DK-AA6R-01	TCGA-DK-AA6R	IV	Advanced	TCGA-E5-A2PC-01	TCGA-E5-A2PC	IV	Advanced	TCGA-E7-A6MD-01	TCGA-E7-A6MD	IV	Advanced
TCGA-E5-A2PC-01	TCGA-E5-A2PC	IV	Advanced	TCGA-E5-A4TZ-01	TCGA-E5-A4TZ	IV	Advanced	TCGA-E7-A7DV-01	TCGA-E7-A7DV	IV	Advanced
TCGA-E5-A4TZ-01	TCGA-E5-A4TZ	IV	Advanced	TCGA-E7-A6MD-01	TCGA-E7-A6MD	IV	Advanced	TCGA-E7-A97Q-01	TCGA-E7-A97Q	IV	Advanced
TCGA-E7-A6MD-01	TCGA-E7-A6MD	IV	Advanced	TCGA-E7-A7DV-01	TCGA-E7-A7DV	IV	Advanced	TCGA-FD-A3B5-01	TCGA-FD-A3B5	IV	Advanced
TCGA-E7-A7DV-01	TCGA-E7-A7DV	IV	Advanced	TCGA-E7-A97Q-01	TCGA-E7-A97Q	IV	Advanced	TCGA-FD-A3SJ-01	TCGA-FD-A3SJ	IV	Advanced
TCGA-E7-A97Q-01	TCGA-E7-A97Q	IV	Advanced	TCGA-FD-A3B5-01	TCGA-FD-A3B5	IV	Advanced	TCGA-FD-A3SL-01	TCGA-FD-A3SL	IV	Advanced
TCGA-FD-A3B5-01	TCGA-FD-A3B5	IV	Advanced	TCGA-FD-A3SJ-01	TCGA-FD-A3SJ	IV	Advanced	TCGA-FD-A3SM-01	TCGA-FD-A3SM	IV	Advanced
TCGA-FD-A3SJ-01	TCGA-FD-A3SJ	IV	Advanced	TCGA-FD-A3SL-01	TCGA-FD-A3SL	IV	Advanced	TCGA-FD-A3SO-01	TCGA-FD-A3SO	IV	Advanced
TCGA-FD-A3SL-01	TCGA-FD-A3SL	IV	Advanced	TCGA-FD-A3SM-01	TCGA-FD-A3SM	IV	Advanced	TCGA-FD-A3SQ-01	TCGA-FD-A3SQ	IV	Advanced
TCGA-FD-A3SM-01	TCGA-FD-A3SM	IV	Advanced	TCGA-FD-A3SO-01	TCGA-FD-A3SO	IV	Advanced	TCGA-FD-A3SR-01	TCGA-FD-A3SR	IV	Advanced
TCGA-FD-A3SO-01	TCGA-FD-A3SO	IV	Advanced	TCGA-FD-A3SQ-01	TCGA-FD-A3SQ	IV	Advanced	TCGA-FD-A3SS-01	TCGA-FD-A3SS	IV	Advanced
TCGA-FD-A3SQ-01	TCGA-FD-A3SQ	IV	Advanced	TCGA-FD-A3SR-01	TCGA-FD-A3SR	IV	Advanced	TCGA-FD-A43U-01	TCGA-FD-A43U	IV	Advanced
TCGA-FD-A3SR-01	TCGA-FD-A3SR	IV	Advanced	TCGA-FD-A3SS-01	TCGA-FD-A3SS	IV	Advanced	TCGA-FD-A5BX-01	TCGA-FD-A5BX	IV	Advanced
TCGA-FD-A3SS-01	TCGA-FD-A3SS	IV	Advanced	TCGA-FD-A43U-01	TCGA-FD-A43U	IV	Advanced	TCGA-FD-A5BZ-01	TCGA-FD-A5BZ	IV	Advanced
TCGA-FD-A43U-01	TCGA-FD-A43U	IV	Advanced	TCGA-FD-A5BX-01	TCGA-FD-A5BX	IV	Advanced	TCGA-FD-A5C0-01	TCGA-FD-A5C0	IV	Advanced
TCGA-FD-A5BX-01	TCGA-FD-A5BX	IV	Advanced	TCGA-FD-A5BZ-01	TCGA-FD-A5BZ	IV	Advanced	TCGA-FD-A62O-01	TCGA-FD-A62O	IV	Advanced
TCGA-FD-A5BZ-01	TCGA-FD-A5BZ	IV	Advanced	TCGA-FD-A5C0-01	TCGA-FD-A5C0	IV	Advanced	TCGA-FD-A6TA-01	TCGA-FD-A6TA	IV	Advanced
TCGA-FD-A5C0-01	TCGA-FD-A5C0	IV	Advanced	TCGA-FD-A62O-01	TCGA-FD-A62O	IV	Advanced	TCGA-FD-A6TE-01	TCGA-FD-A6TE	IV	Advanced
TCGA-FD-A62O-01	TCGA-FD-A62O	IV	Advanced	TCGA-FD-A6TA-01	TCGA-FD-A6TA	IV	Advanced	TCGA-FD-A6TF-01	TCGA-FD-A6TF	IV	Advanced
TCGA-FD-A6TA-01	TCGA-FD-A6TA	IV	Advanced	TCGA-FD-A6TE-01	TCGA-FD-A6TE	IV	Advanced	TCGA-FD-A6TG-01	TCGA-FD-A6TG	IV	Advanced
TCGA-FD-A6TE-01	TCGA-FD-A6TE	IV	Advanced	TCGA-FD-A6TF-01	TCGA-FD-A6TF	IV	Advanced	TCGA-FD-A6TH-01	TCGA-FD-A6TH	IV	Advanced
TCGA-FD-A6TF-01	TCGA-FD-A6TF	IV	Advanced	TCGA-FD-A6TG-01	TCGA-FD-A6TG	IV	Advanced	TCGA-FD-A6TI-01	TCGA-FD-A6TI	IV	Advanced
TCGA-FD-A6TG-01	TCGA-FD-A6TG	IV	Advanced	TCGA-FD-A6TH-01	TCGA-FD-A6TH	IV	Advanced	TCGA-FJ-A3Z7-01	TCGA-FJ-A3Z7	IV	Advanced
TCGA-FD-A6TH-01	TCGA-FD-A6TH	IV	Advanced	TCGA-FD-A6TI-01	TCGA-FD-A6TI	IV	Advanced	TCGA-FJ-A3ZE-01	TCGA-FJ-A3ZE	IV	Advanced
TCGA-FD-A6TI-01	TCGA-FD-A6TI	IV	Advanced	TCGA-FJ-A3Z7-01	TCGA-FJ-A3Z7	IV	Advanced	TCGA-FT-A61P-01	TCGA-FT-A61P	IV	Advanced
TCGA-FJ-A3Z7-01	TCGA-FJ-A3Z7	IV	Advanced	TCGA-FJ-A3ZE-01	TCGA-FJ-A3ZE	IV	Advanced	TCGA-G2-AA3D-01	TCGA-G2-AA3D	IV	Advanced
TCGA-FJ-A3ZE-01	TCGA-FJ-A3ZE	IV	Advanced	TCGA-FT-A61P-01	TCGA-FT-A61P	IV	Advanced	TCGA-G2-AA3F-01	TCGA-G2-AA3F	IV	Advanced
TCGA-FT-A61P-01	TCGA-FT-A61P	IV	Advanced	TCGA-G2-AA3C-01	TCGA-G2-AA3C	IV	Advanced	TCGA-GC-A3YS-01	TCGA-GC-A3YS	IV	Advanced
TCGA-G2-AA3D-01	TCGA-G2-AA3D	IV	Advanced	TCGA-G2-AA3D-01	TCGA-G2-AA3D	IV	Advanced	TCGA-GC-A6I3-01	TCGA-GC-A6I3	IV	Advanced
TCGA-G2-AA3F-01	TCGA-G2-AA3F	IV	Advanced	TCGA-G2-AA3F-01	TCGA-G2-AA3F	IV	Advanced	TCGA-GD-A2C5-01	TCGA-GD-A2C5	IV	Advanced
TCGA-GC-A3YS-01	TCGA-GC-A3YS	IV	Advanced	TCGA-GC-A3YS-01	TCGA-GC-A3YS	IV	Advanced	TCGA-GD-A3OP-01	TCGA-GD-A3OP	IV	Advanced
TCGA-GC-A6I3-01	TCGA-GC-A6I3	IV	Advanced	TCGA-GC-A6I3-01	TCGA-GC-A6I3	IV	Advanced	TCGA-GD-A3OQ-01	TCGA-GD-A3OQ	IV	Advanced
TCGA-GD-A2C5-01	TCGA-GD-A2C5	IV	Advanced	TCGA-GD-A2C5-01	TCGA-GD-A2C5	IV	Advanced	TCGA-GU-A42P-01	TCGA-GU-A42P	IV	Advanced
TCGA-GD-A3OP-01	TCGA-GD-A3OP	IV	Advanced	TCGA-GD-A3OP-01	TCGA-GD-A3OP	IV	Advanced	TCGA-GU-A42R-01	TCGA-GU-A42R	IV	Advanced
TCGA-GD-A3OQ-01	TCGA-GD-A3OQ	IV	Advanced	TCGA-GD-A3OQ-01	TCGA-GD-A3OQ	IV	Advanced	TCGA-GU-A762-01	TCGA-GU-A762	IV	Advanced
TCGA-GU-A42P-01	TCGA-GU-A42P	IV	Advanced	TCGA-GU-A42P-01	TCGA-GU-A42P	IV	Advanced	TCGA-GU-A767-01	TCGA-GU-A767	IV	Advanced
TCGA-GU-A42R-01	TCGA-GU-A42R	IV	Advanced	TCGA-GU-A42R-01	TCGA-GU-A42R	IV	Advanced	TCGA-GU-AATO-01	TCGA-GU-AATO	IV	Advanced
TCGA-GU-A762-01	TCGA-GU-A762	IV	Advanced	TCGA-GU-A762-01	TCGA-GU-A762	IV	Advanced	TCGA-GU-AATP-01	TCGA-GU-AATP	IV	Advanced
TCGA-GU-A767-01	TCGA-GU-A767	IV	Advanced	TCGA-GU-A767-01	TCGA-GU-A767	IV	Advanced	TCGA-GV-A3JV-01	TCGA-GV-A3JV	IV	Advanced
TCGA-GU-AATO-01	TCGA-GU-AATO	IV	Advanced	TCGA-GU-AATO-01	TCGA-GU-AATO	IV	Advanced	TCGA-GV-A3JZ-01	TCGA-GV-A3JZ	IV	Advanced
TCGA-GU-AATP-01	TCGA-GU-AATP	IV	Advanced	TCGA-GU-AATP-01	TCGA-GU-AATP	IV	Advanced	TCGA-GV-A3QF-01	TCGA-GV-A3QF	IV	Advanced
TCGA-GV-A3JV-01	TCGA-GV-A3JV	IV	Advanced	TCGA-GV-A3JV-01	TCGA-GV-A3JV	IV	Advanced	TCGA-GV-A3QG-01	TCGA-GV-A3QG	IV	Advanced
TCGA-GV-A3JZ-01	TCGA-GV-A3JZ	IV	Advanced	TCGA-GV-A3JZ-01	TCGA-GV-A3JZ	IV	Advanced	TCGA-GV-A3QK-01	TCGA-GV-A3QK	IV	Advanced
TCGA-GV-A3QF-01	TCGA-GV-A3QF	IV	Advanced	TCGA-GV-A3QF-01	TCGA-GV-A3QF	IV	Advanced	TCGA-H4-A2HQ-01	TCGA-H4-A2HQ	IV	Advanced
TCGA-GV-A3QG-01	TCGA-GV-A3QG	IV	Advanced	TCGA-GV-A3QG-01	TCGA-GV-A3QG	IV	Advanced	TCGA-HQ-A5ND-01	TCGA-HQ-A5ND	IV	Advanced
TCGA-GV-A3QK-01	TCGA-GV-A3QK	IV	Advanced	TCGA-GV-A3QK-01	TCGA-GV-A3QK	IV	Advanced	TCGA-K4-A6MB-01	TCGA-K4-A6MB	IV	Advanced
TCGA-H4-A2HQ-01	TCGA-H4-A2HQ	IV	Advanced	TCGA-H4-A2HQ-01	TCGA-H4-A2HQ	IV	Advanced	TCGA-K4-A83P-01	TCGA-K4-A83P	IV	Advanced
TCGA-HQ-A5ND-01	TCGA-HQ-A5ND	IV	Advanced	TCGA-HQ-A5ND-01	TCGA-HQ-A5ND	IV	Advanced	TCGA-KQ-A41O-01	TCGA-KQ-A41O	IV	Advanced
TCGA-K4-A6MB-01	TCGA-K4-A6MB	IV	Advanced	TCGA-K4-A6MB-01	TCGA-K4-A6MB	IV	Advanced	TCGA-KQ-A41P-01	TCGA-KQ-A41P	IV	Advanced
TCGA-K4-A83P-01	TCGA-K4-A83P	IV	Advanced	TCGA-K4-A83P-01	TCGA-K4-A83P	IV	Advanced	TCGA-LC-A66R-01	TCGA-LC-A66R	IV	Advanced
TCGA-KQ-A41O-01	TCGA-KQ-A41O	IV	Advanced	TCGA-KQ-A41O-01	TCGA-KQ-A41O	IV	Advanced	TCGA-S5-A6DX-01	TCGA-S5-A6DX	IV	Advanced
TCGA-KQ-A41P-01	TCGA-KQ-A41P	IV	Advanced	TCGA-KQ-A41P-01	TCGA-KQ-A41P	IV	Advanced	TCGA-SY-A9G0-01	TCGA-SY-A9G0	IV	Advanced
TCGA-LC-A66R-01	TCGA-LC-A66R	IV	Advanced	TCGA-LC-A66R-01	TCGA-LC-A66R	IV	Advanced	TCGA-UY-A78K-01	TCGA-UY-A78K	IV	Advanced
TCGA-S5-A6DX-01	TCGA-S5-A6DX	IV	Advanced	TCGA-S5-A6DX-01	TCGA-S5-A6DX	IV	Advanced	TCGA-UY-A78L-01	TCGA-UY-A78L	IV	Advanced
TCGA-SY-A9G0-01	TCGA-SY-A9G0	IV	Advanced	TCGA-SY-A9G0-01	TCGA-SY-A9G0	IV	Advanced	TCGA-UY-A78M-01	TCGA-UY-A78M	IV	Advanced
TCGA-UY-A78K-01	TCGA-UY-A78K	IV	Advanced	TCGA-UY-A78K-01	TCGA-UY-A78K	IV	Advanced	TCGA-UY-A78N-01	TCGA-UY-A78N	IV	Advanced
TCGA-UY-A78L-01	TCGA-UY-A78L	IV	Advanced	TCGA-UY-A78L-01	TCGA-UY-A78L	IV	Advanced	TCGA-UY-A8OB-01	TCGA-UY-A8OB	IV	Advanced
TCGA-UY-A78M-01	TCGA-UY-A78M	IV	Advanced	TCGA-UY-A78M-01	TCGA-UY-A78M	IV	Advanced	TCGA-UY-A8OC-01	TCGA-UY-A8OC	IV	Advanced
TCGA-UY-A78N-01	TCGA-UY-A78N	IV	Advanced	TCGA-UY-A78N-01	TCGA-UY-A78N	IV	Advanced	TCGA-UY-A9PE-01	TCGA-UY-A9PE	IV	Advanced
TCGA-UY-A8OB-01	TCGA-UY-A8OB	IV	Advanced	TCGA-UY-A8OB-01	TCGA-UY-A8OB	IV	Advanced	TCGA-UY-A9PF-01	TCGA-UY-A9PF	IV	Advanced
TCGA-UY-A8OC-01	TCGA-UY-A8OC	IV	Advanced	TCGA-UY-A8OC-01	TCGA-UY-A8OC	IV	Advanced	TCGA-XF-A8HC-01	TCGA-XF-A8HC	IV	Advanced
TCGA-UY-A9PE-01	TCGA-UY-A9PE	IV	Advanced	TCGA-UY-A9PE-01	TCGA-UY-A9PE	IV	Advanced	TCGA-XF-A8HH-01	TCGA-XF-A8HH	IV	Advanced
TCGA-UY-A9PF-01	TCGA-UY-A9PF	IV	Advanced	TCGA-UY-A9PF-01	TCGA-UY-A9PF	IV	Advanced	TCGA-XF-A8HI-01	TCGA-XF-A8HI	IV	Advanced
TCGA-XF-A8HC-01	TCGA-XF-A8HC	IV	Advanced	TCGA-XF-A8HC-01	TCGA-XF-A8HC	IV	Advanced	TCGA-XF-A9SJ-01	TCGA-XF-A9SJ	IV	Advanced
TCGA-XF-A8HH-01	TCGA-XF-A8HH	IV	Advanced	TCGA-XF-A8HH-01	TCGA-XF-A8HH	IV	Advanced	TCGA-XF-A9SK-01	TCGA-XF-A9SK	IV	Advanced
TCGA-XF-A8HI-01	TCGA-XF-A8HI	IV	Advanced	TCGA-XF-A8HI-01	TCGA-XF-A8HI	IV	Advanced	TCGA-XF-A9SL-01	TCGA-XF-A9SL	IV	Advanced
TCGA-XF-A9SJ-01	TCGA-XF-A9SJ	IV	Advanced	TCGA-XF-A9SJ-01	TCGA-XF-A9SJ	IV	Advanced	TCGA-XF-A9SU-01	TCGA-XF-A9SU	IV	Advanced
TCGA-XF-A9SK-01	TCGA-XF-A9SK	IV	Advanced	TCGA-XF-A9SK-01	TCGA-XF-A9SK	IV	Advanced	TCGA-XF-A9SV-01	TCGA-XF-A9SV	IV	Advanced
TCGA-XF-A9SL-01	TCGA-XF-A9SL	IV	Advanced	TCGA-XF-A9SL-01	TCGA-XF-A9SL	IV	Advanced	TCGA-XF-A9SW-01	TCGA-XF-A9SW	IV	Advanced
TCGA-XF-A9SU-01	TCGA-XF-A9SU	IV	Advanced	TCGA-XF-A9SU-01	TCGA-XF-A9SU	IV	Advanced	TCGA-XF-A9SX-01	TCGA-XF-A9SX	IV	Advanced
TCGA-XF-A9SV-01	TCGA-XF-A9SV	IV	Advanced	TCGA-XF-A9SV-01	TCGA-XF-A9SV	IV	Advanced	TCGA-XF-A9SY-01	TCGA-XF-A9SY	IV	Advanced
TCGA-XF-A9SW-01	TCGA-XF-A9SW	IV	Advanced	TCGA-XF-A9SW-01	TCGA-XF-A9SW	IV	Advanced	TCGA-XF-A9SZ-01	TCGA-XF-A9SZ	IV	Advanced
TCGA-XF-A9SX-01	TCGA-XF-A9SX	IV	Advanced	TCGA-XF-A9SX-01	TCGA-XF-A9SX	IV	Advanced	TCGA-XF-A9T3-01	TCGA-XF-A9T3	IV	Advanced
TCGA-XF-A9SY-01	TCGA-XF-A9SY	IV	Advanced	TCGA-XF-A9SY-01	TCGA-XF-A9SY	IV	Advanced	TCGA-XF-A9T4-01	TCGA-XF-A9T4	IV	Advanced
TCGA-XF-A9SZ-01	TCGA-XF-A9SZ	IV	Advanced	TCGA-XF-A9SZ-01	TCGA-XF-A9SZ	IV	Advanced	TCGA-XF-A9T5-01	TCGA-XF-A9T5	IV	Advanced
TCGA-XF-A9T3-01	TCGA-XF-A9T3	IV	Advanced	TCGA-XF-A9T3-01	TCGA-XF-A9T3	IV	Advanced	TCGA-XF-AAMH-01	TCGA-XF-AAMH	IV	Advanced
TCGA-XF-A9T4-01	TCGA-XF-A9T4	IV	Advanced	TCGA-XF-A9T4-01	TCGA-XF-A9T4	IV	Advanced	TCGA-XF-AAMT-01	TCGA-XF-AAMT	IV	Advanced
TCGA-XF-A9T5-01	TCGA-XF-A9T5	IV	Advanced	TCGA-XF-A9T5-01	TCGA-XF-A9T5	IV	Advanced	TCGA-XF-AAMW-01	TCGA-XF-AAMW	IV	Advanced
TCGA-XF-AAMF-01	TCGA-XF-AAMF	IV	Advanced	TCGA-XF-AAMH-01	TCGA-XF-AAMH	IV	Advanced	TCGA-XF-AAMZ-01	TCGA-XF-AAMZ	IV	Advanced
TCGA-XF-AAMH-01	TCGA-XF-AAMH	IV	Advanced	TCGA-XF-AAMT-01	TCGA-XF-AAMT	IV	Advanced	TCGA-XF-AAN0-01	TCGA-XF-AAN0	IV	Advanced
TCGA-XF-AAMT-01	TCGA-XF-AAMT	IV	Advanced	TCGA-XF-AAMW-01	TCGA-XF-AAMW	IV	Advanced	TCGA-XF-AAN3-01	TCGA-XF-AAN3	IV	Advanced
TCGA-XF-AAMW-01	TCGA-XF-AAMW	IV	Advanced	TCGA-XF-AAMZ-01	TCGA-XF-AAMZ	IV	Advanced	TCGA-XF-AAN7-01	TCGA-XF-AAN7	IV	Advanced
TCGA-XF-AAMZ-01	TCGA-XF-AAMZ	IV	Advanced	TCGA-XF-AAN0-01	TCGA-XF-AAN0	IV	Advanced	TCGA-YC-A9TC-01	TCGA-YC-A9TC	IV	Advanced
TCGA-XF-AAN0-01	TCGA-XF-AAN0	IV	Advanced	TCGA-XF-AAN3-01	TCGA-XF-AAN3	IV	Advanced	TCGA-ZF-A9R1-01	TCGA-ZF-A9R1	IV	Advanced
TCGA-XF-AAN3-01	TCGA-XF-AAN3	IV	Advanced	TCGA-XF-AAN7-01	TCGA-XF-AAN7	IV	Advanced	TCGA-ZF-A9R9-01	TCGA-ZF-A9R9	IV	Advanced
TCGA-XF-AAN7-01	TCGA-XF-AAN7	IV	Advanced	TCGA-YC-A9TC-01	TCGA-YC-A9TC	IV	Advanced	TCGA-ZF-A9RD-01	TCGA-ZF-A9RD	IV	Advanced
TCGA-YC-A9TC-01	TCGA-YC-A9TC	IV	Advanced	TCGA-ZF-A9R1-01	TCGA-ZF-A9R1	IV	Advanced	TCGA-ZF-AA4R-01	TCGA-ZF-AA4R	IV	Advanced
TCGA-ZF-A9R1-01	TCGA-ZF-A9R1	IV	Advanced	TCGA-ZF-A9R9-01	TCGA-ZF-A9R9	IV	Advanced	TCGA-ZF-AA4T-01	TCGA-ZF-AA4T	IV	Advanced
TCGA-ZF-A9R9-01	TCGA-ZF-A9R9	IV	Advanced	TCGA-ZF-A9RD-01	TCGA-ZF-A9RD	IV	Advanced	TCGA-ZF-AA58-01	TCGA-ZF-AA58	IV	Advanced
TCGA-ZF-A9RD-01	TCGA-ZF-A9RD	IV	Advanced	TCGA-ZF-AA4R-01	TCGA-ZF-AA4R	IV	Advanced	TCGA-ZF-AA5H-01	TCGA-ZF-AA5H	IV	Advanced
TCGA-ZF-AA4R-01	TCGA-ZF-AA4R	IV	Advanced	TCGA-ZF-AA4T-01	TCGA-ZF-AA4T	IV	Advanced	TCGA-ZF-AA5N-01	TCGA-ZF-AA5N	IV	Advanced
TCGA-ZF-AA4T-01	TCGA-ZF-AA4T	IV	Advanced	TCGA-ZF-AA58-01	TCGA-ZF-AA58	IV	Advanced	TCGA-ZF-AA5P-01	TCGA-ZF-AA5P	IV	Advanced
TCGA-ZF-AA58-01	TCGA-ZF-AA58	IV	Advanced	TCGA-ZF-AA5H-01	TCGA-ZF-AA5H	IV	Advanced	TCGA-FJ-A3Z9-01	TCGA-FJ-A3Z9	TNS	TNS
TCGA-ZF-AA5H-01	TCGA-ZF-AA5H	IV	Advanced	TCGA-ZF-AA5N-01	TCGA-ZF-AA5N	IV	Advanced	TCGA-HQ-A2OE-01	TCGA-HQ-A2OE	TNS	TNS
TCGA-ZF-AA5N-01	TCGA-ZF-AA5N	IV	Advanced	TCGA-ZF-AA5P-01	TCGA-ZF-AA5P	IV	Advanced
TCGA-ZF-AA5P-01	TCGA-ZF-AA5P	IV	Advanced	TCGA-FJ-A3Z9-01	TCGA-FJ-A3Z9	TNS	TNS
TCGA-FJ-A3Z9-01	TCGA-FJ-A3Z9	TNS	TNS	TCGA-HQ-A2OE-01	TCGA-HQ-A2OE	TNS	TNS
TCGA-HQ-A2OE-01	TCGA-HQ-A2OE	TNS	TNS

## Sheet: BRCA
Step 1 (Differential analysis )								Step 2 (Correlation analysis)				Step 3 (Confirm correlation result)
miRNA sequencing				RNA sequencing				RNA sequencing and miRNA sequencing				Paired samples
Samples	Patients	Stages	Groups	Samples	Patients	Stages	Groups	Samples	Patients	Stages	Groups	Samples	Patients	Stages	Groups
TCGA-A7-A0CE-11	TCGA-A7-A0CE	HC	HC	TCGA-A7-A0CE-11	TCGA-A7-A0CE	HC	HC	TCGA-A7-A0CE-11	TCGA-A7-A0CE	HC	HC	TCGA-A7-A0CE-11	TCGA-A7-A0CE	HC	HC
TCGA-A7-A0D9-11	TCGA-A7-A0D9	HC	HC	TCGA-A7-A0CH-11	TCGA-A7-A0CH	HC	HC	TCGA-A7-A0D9-11	TCGA-A7-A0D9	HC	HC	TCGA-A7-A0CE-01	TCGA-A7-A0CE	II	Early
TCGA-A7-A0DB-11	TCGA-A7-A0DB	HC	HC	TCGA-A7-A0D9-11	TCGA-A7-A0D9	HC	HC	TCGA-A7-A0DB-11	TCGA-A7-A0DB	HC	HC	TCGA-A7-A0D9-11	TCGA-A7-A0D9	HC	HC
TCGA-A7-A0DC-11	TCGA-A7-A0DC	HC	HC	TCGA-A7-A0DB-11	TCGA-A7-A0DB	HC	HC	TCGA-A7-A0DC-11	TCGA-A7-A0DC	HC	HC	TCGA-A7-A0D9-01	TCGA-A7-A0D9	II	Early
TCGA-A7-A13E-11	TCGA-A7-A13E	HC	HC	TCGA-A7-A0DC-11	TCGA-A7-A0DC	HC	HC	TCGA-A7-A13E-11	TCGA-A7-A13E	HC	HC	TCGA-A7-A0DB-11	TCGA-A7-A0DB	HC	HC
TCGA-A7-A13F-11	TCGA-A7-A13F	HC	HC	TCGA-A7-A13E-11	TCGA-A7-A13E	HC	HC	TCGA-A7-A13F-11	TCGA-A7-A13F	HC	HC	TCGA-A7-A0DB-01	TCGA-A7-A0DB	II	Early
TCGA-A7-A13G-11	TCGA-A7-A13G	HC	HC	TCGA-A7-A13F-11	TCGA-A7-A13F	HC	HC	TCGA-A7-A13G-11	TCGA-A7-A13G	HC	HC	TCGA-A7-A0DC-11	TCGA-A7-A0DC	HC	HC
TCGA-AC-A23H-11	TCGA-AC-A23H	HC	HC	TCGA-A7-A13G-11	TCGA-A7-A13G	HC	HC	TCGA-AC-A23H-11	TCGA-AC-A23H	HC	HC	TCGA-A7-A0DC-01	TCGA-A7-A0DC	I	Early
TCGA-AC-A2FB-11	TCGA-AC-A2FB	HC	HC	TCGA-AC-A23H-11	TCGA-AC-A23H	HC	HC	TCGA-AC-A2FB-11	TCGA-AC-A2FB	HC	HC	TCGA-A7-A13E-11	TCGA-A7-A13E	HC	HC
TCGA-AC-A2FM-11	TCGA-AC-A2FM	HC	HC	TCGA-AC-A2FB-11	TCGA-AC-A2FB	HC	HC	TCGA-AC-A2FM-11	TCGA-AC-A2FM	HC	HC	TCGA-A7-A13E-01	TCGA-A7-A13E	II	Early
TCGA-BH-A0AU-11	TCGA-BH-A0AU	HC	HC	TCGA-AC-A2FF-11	TCGA-AC-A2FF	HC	HC	TCGA-BH-A0AU-11	TCGA-BH-A0AU	HC	HC	TCGA-A7-A13F-11	TCGA-A7-A13F	HC	HC
TCGA-BH-A0AY-11	TCGA-BH-A0AY	HC	HC	TCGA-AC-A2FM-11	TCGA-AC-A2FM	HC	HC	TCGA-BH-A0AY-11	TCGA-BH-A0AY	HC	HC	TCGA-A7-A13F-01	TCGA-A7-A13F	III	Advanced
TCGA-BH-A0AZ-11	TCGA-BH-A0AZ	HC	HC	TCGA-BH-A0AU-11	TCGA-BH-A0AU	HC	HC	TCGA-BH-A0AZ-11	TCGA-BH-A0AZ	HC	HC	TCGA-A7-A13G-11	TCGA-A7-A13G	HC	HC
TCGA-BH-A0B3-11	TCGA-BH-A0B3	HC	HC	TCGA-BH-A0AY-11	TCGA-BH-A0AY	HC	HC	TCGA-BH-A0B3-11	TCGA-BH-A0B3	HC	HC	TCGA-A7-A13G-01	TCGA-A7-A13G	II	Early
TCGA-BH-A0B5-11	TCGA-BH-A0B5	HC	HC	TCGA-BH-A0AZ-11	TCGA-BH-A0AZ	HC	HC	TCGA-BH-A0B5-11	TCGA-BH-A0B5	HC	HC	TCGA-AC-A23H-11	TCGA-AC-A23H	HC	HC
TCGA-BH-A0B7-11	TCGA-BH-A0B7	HC	HC	TCGA-BH-A0B3-11	TCGA-BH-A0B3	HC	HC	TCGA-BH-A0B7-11	TCGA-BH-A0B7	HC	HC	TCGA-AC-A23H-01	TCGA-AC-A23H	II	Early
TCGA-BH-A0BC-11	TCGA-BH-A0BC	HC	HC	TCGA-BH-A0B5-11	TCGA-BH-A0B5	HC	HC	TCGA-BH-A0BC-11	TCGA-BH-A0BC	HC	HC	TCGA-AC-A2FB-11	TCGA-AC-A2FB	HC	HC
TCGA-BH-A0BJ-11	TCGA-BH-A0BJ	HC	HC	TCGA-BH-A0B7-11	TCGA-BH-A0B7	HC	HC	TCGA-BH-A0BJ-11	TCGA-BH-A0BJ	HC	HC	TCGA-AC-A2FB-01	TCGA-AC-A2FB	II	Early
TCGA-BH-A0BQ-11	TCGA-BH-A0BQ	HC	HC	TCGA-BH-A0B8-11	TCGA-BH-A0B8	HC	HC	TCGA-BH-A0BQ-11	TCGA-BH-A0BQ	HC	HC	TCGA-AC-A2FM-11	TCGA-AC-A2FM	HC	HC
TCGA-BH-A0BS-11	TCGA-BH-A0BS	HC	HC	TCGA-BH-A0BA-11	TCGA-BH-A0BA	HC	HC	TCGA-BH-A0BS-11	TCGA-BH-A0BS	HC	HC	TCGA-AC-A2FM-01	TCGA-AC-A2FM	II	Early
TCGA-BH-A0BT-11	TCGA-BH-A0BT	HC	HC	TCGA-BH-A0BC-11	TCGA-BH-A0BC	HC	HC	TCGA-BH-A0BT-11	TCGA-BH-A0BT	HC	HC	TCGA-BH-A0AU-11	TCGA-BH-A0AU	HC	HC
TCGA-BH-A0BV-11	TCGA-BH-A0BV	HC	HC	TCGA-BH-A0BJ-11	TCGA-BH-A0BJ	HC	HC	TCGA-BH-A0BV-11	TCGA-BH-A0BV	HC	HC	TCGA-BH-A0AU-01	TCGA-BH-A0AU	II	Early
TCGA-BH-A0BW-11	TCGA-BH-A0BW	HC	HC	TCGA-BH-A0BM-11	TCGA-BH-A0BM	HC	HC	TCGA-BH-A0BW-11	TCGA-BH-A0BW	HC	HC	TCGA-BH-A0AY-11	TCGA-BH-A0AY	HC	HC
TCGA-BH-A0BZ-11	TCGA-BH-A0BZ	HC	HC	TCGA-BH-A0BQ-11	TCGA-BH-A0BQ	HC	HC	TCGA-BH-A0BZ-11	TCGA-BH-A0BZ	HC	HC	TCGA-BH-A0AY-01	TCGA-BH-A0AY	II	Early
TCGA-BH-A0C0-11	TCGA-BH-A0C0	HC	HC	TCGA-BH-A0BS-11	TCGA-BH-A0BS	HC	HC	TCGA-BH-A0C0-11	TCGA-BH-A0C0	HC	HC	TCGA-BH-A0AZ-11	TCGA-BH-A0AZ	HC	HC
TCGA-BH-A0C3-11	TCGA-BH-A0C3	HC	HC	TCGA-BH-A0BT-11	TCGA-BH-A0BT	HC	HC	TCGA-BH-A0C3-11	TCGA-BH-A0C3	HC	HC	TCGA-BH-A0AZ-01	TCGA-BH-A0AZ	III	Advanced
TCGA-BH-A0DD-11	TCGA-BH-A0DD	HC	HC	TCGA-BH-A0BV-11	TCGA-BH-A0BV	HC	HC	TCGA-BH-A0DD-11	TCGA-BH-A0DD	HC	HC	TCGA-BH-A0B3-11	TCGA-BH-A0B3	HC	HC
TCGA-BH-A0DG-11	TCGA-BH-A0DG	HC	HC	TCGA-BH-A0BW-11	TCGA-BH-A0BW	HC	HC	TCGA-BH-A0DG-11	TCGA-BH-A0DG	HC	HC	TCGA-BH-A0B3-01	TCGA-BH-A0B3	II	Early
TCGA-BH-A0DK-11	TCGA-BH-A0DK	HC	HC	TCGA-BH-A0BZ-11	TCGA-BH-A0BZ	HC	HC	TCGA-BH-A0DK-11	TCGA-BH-A0DK	HC	HC	TCGA-BH-A0B5-11	TCGA-BH-A0B5	HC	HC
TCGA-BH-A0DL-11	TCGA-BH-A0DL	HC	HC	TCGA-BH-A0C0-11	TCGA-BH-A0C0	HC	HC	TCGA-BH-A0DL-11	TCGA-BH-A0DL	HC	HC	TCGA-BH-A0B5-01	TCGA-BH-A0B5	III	Advanced
TCGA-BH-A0DO-11	TCGA-BH-A0DO	HC	HC	TCGA-BH-A0C3-11	TCGA-BH-A0C3	HC	HC	TCGA-BH-A0DO-11	TCGA-BH-A0DO	HC	HC	TCGA-BH-A0B7-11	TCGA-BH-A0B7	HC	HC
TCGA-BH-A0DP-11	TCGA-BH-A0DP	HC	HC	TCGA-BH-A0DD-11	TCGA-BH-A0DD	HC	HC	TCGA-BH-A0DP-11	TCGA-BH-A0DP	HC	HC	TCGA-BH-A0B7-01	TCGA-BH-A0B7	II	Early
TCGA-BH-A0DQ-11	TCGA-BH-A0DQ	HC	HC	TCGA-BH-A0DG-11	TCGA-BH-A0DG	HC	HC	TCGA-BH-A0DQ-11	TCGA-BH-A0DQ	HC	HC	TCGA-BH-A0BC-11	TCGA-BH-A0BC	HC	HC
TCGA-BH-A0DT-11	TCGA-BH-A0DT	HC	HC	TCGA-BH-A0DH-11	TCGA-BH-A0DH	HC	HC	TCGA-BH-A0DT-11	TCGA-BH-A0DT	HC	HC	TCGA-BH-A0BC-01	TCGA-BH-A0BC	III	Advanced
TCGA-BH-A0DV-11	TCGA-BH-A0DV	HC	HC	TCGA-BH-A0DK-11	TCGA-BH-A0DK	HC	HC	TCGA-BH-A0DV-11	TCGA-BH-A0DV	HC	HC	TCGA-BH-A0BJ-11	TCGA-BH-A0BJ	HC	HC
TCGA-BH-A0DZ-11	TCGA-BH-A0DZ	HC	HC	TCGA-BH-A0DL-11	TCGA-BH-A0DL	HC	HC	TCGA-BH-A0DZ-11	TCGA-BH-A0DZ	HC	HC	TCGA-BH-A0BJ-01	TCGA-BH-A0BJ	II	Early
TCGA-BH-A0E1-11	TCGA-BH-A0E1	HC	HC	TCGA-BH-A0DO-11	TCGA-BH-A0DO	HC	HC	TCGA-BH-A0E1-11	TCGA-BH-A0E1	HC	HC	TCGA-BH-A0BQ-11	TCGA-BH-A0BQ	HC	HC
TCGA-BH-A0H5-11	TCGA-BH-A0H5	HC	HC	TCGA-BH-A0DP-11	TCGA-BH-A0DP	HC	HC	TCGA-BH-A0H5-11	TCGA-BH-A0H5	HC	HC	TCGA-BH-A0BQ-01	TCGA-BH-A0BQ	I	Early
TCGA-BH-A0H7-11	TCGA-BH-A0H7	HC	HC	TCGA-BH-A0DQ-11	TCGA-BH-A0DQ	HC	HC	TCGA-BH-A0H7-11	TCGA-BH-A0H7	HC	HC	TCGA-BH-A0BT-11	TCGA-BH-A0BT	HC	HC
TCGA-BH-A0HA-11	TCGA-BH-A0HA	HC	HC	TCGA-BH-A0DT-11	TCGA-BH-A0DT	HC	HC	TCGA-BH-A0HA-11	TCGA-BH-A0HA	HC	HC	TCGA-BH-A0BT-01	TCGA-BH-A0BT	II	Early
TCGA-BH-A0HK-11	TCGA-BH-A0HK	HC	HC	TCGA-BH-A0DV-11	TCGA-BH-A0DV	HC	HC	TCGA-BH-A0HK-11	TCGA-BH-A0HK	HC	HC	TCGA-BH-A0BV-11	TCGA-BH-A0BV	HC	HC
TCGA-BH-A18J-11	TCGA-BH-A18J	HC	HC	TCGA-BH-A0DZ-11	TCGA-BH-A0DZ	HC	HC	TCGA-BH-A18J-11	TCGA-BH-A18J	HC	HC	TCGA-BH-A0BV-01	TCGA-BH-A0BV	II	Early
TCGA-BH-A18K-11	TCGA-BH-A18K	HC	HC	TCGA-BH-A0E0-11	TCGA-BH-A0E0	HC	HC	TCGA-BH-A18K-11	TCGA-BH-A18K	HC	HC	TCGA-BH-A0BW-11	TCGA-BH-A0BW	HC	HC
TCGA-BH-A18L-11	TCGA-BH-A18L	HC	HC	TCGA-BH-A0E1-11	TCGA-BH-A0E1	HC	HC	TCGA-BH-A18L-11	TCGA-BH-A18L	HC	HC	TCGA-BH-A0BW-01	TCGA-BH-A0BW	I	Early
TCGA-BH-A18M-11	TCGA-BH-A18M	HC	HC	TCGA-BH-A0H5-11	TCGA-BH-A0H5	HC	HC	TCGA-BH-A18M-11	TCGA-BH-A18M	HC	HC	TCGA-BH-A0BZ-11	TCGA-BH-A0BZ	HC	HC
TCGA-BH-A18N-11	TCGA-BH-A18N	HC	HC	TCGA-BH-A0H7-11	TCGA-BH-A0H7	HC	HC	TCGA-BH-A18N-11	TCGA-BH-A18N	HC	HC	TCGA-BH-A0BZ-01	TCGA-BH-A0BZ	III	Advanced
TCGA-BH-A18P-11	TCGA-BH-A18P	HC	HC	TCGA-BH-A0H9-11	TCGA-BH-A0H9	HC	HC	TCGA-BH-A18P-11	TCGA-BH-A18P	HC	HC	TCGA-BH-A0C0-11	TCGA-BH-A0C0	HC	HC
TCGA-BH-A18Q-11	TCGA-BH-A18Q	HC	HC	TCGA-BH-A0HA-11	TCGA-BH-A0HA	HC	HC	TCGA-BH-A18Q-11	TCGA-BH-A18Q	HC	HC	TCGA-BH-A0C0-01	TCGA-BH-A0C0	II	Early
TCGA-BH-A18R-11	TCGA-BH-A18R	HC	HC	TCGA-BH-A0HK-11	TCGA-BH-A0HK	HC	HC	TCGA-BH-A18R-11	TCGA-BH-A18R	HC	HC	TCGA-BH-A0C3-11	TCGA-BH-A0C3	HC	HC
TCGA-BH-A18S-11	TCGA-BH-A18S	HC	HC	TCGA-BH-A18J-11	TCGA-BH-A18J	HC	HC	TCGA-BH-A18S-11	TCGA-BH-A18S	HC	HC	TCGA-BH-A0C3-01	TCGA-BH-A0C3	I	Early
TCGA-BH-A18U-11	TCGA-BH-A18U	HC	HC	TCGA-BH-A18K-11	TCGA-BH-A18K	HC	HC	TCGA-BH-A18U-11	TCGA-BH-A18U	HC	HC	TCGA-BH-A0DD-11	TCGA-BH-A0DD	HC	HC
TCGA-BH-A1EN-11	TCGA-BH-A1EN	HC	HC	TCGA-BH-A18L-11	TCGA-BH-A18L	HC	HC	TCGA-BH-A1EN-11	TCGA-BH-A1EN	HC	HC	TCGA-BH-A0DD-01	TCGA-BH-A0DD	II	Early
TCGA-BH-A1EO-11	TCGA-BH-A1EO	HC	HC	TCGA-BH-A18M-11	TCGA-BH-A18M	HC	HC	TCGA-BH-A1EO-11	TCGA-BH-A1EO	HC	HC	TCGA-BH-A0DG-11	TCGA-BH-A0DG	HC	HC
TCGA-BH-A1ET-11	TCGA-BH-A1ET	HC	HC	TCGA-BH-A18N-11	TCGA-BH-A18N	HC	HC	TCGA-BH-A1ET-11	TCGA-BH-A1ET	HC	HC	TCGA-BH-A0DG-01	TCGA-BH-A0DG	II	Early
TCGA-BH-A1EU-11	TCGA-BH-A1EU	HC	HC	TCGA-BH-A18P-11	TCGA-BH-A18P	HC	HC	TCGA-BH-A1EU-11	TCGA-BH-A1EU	HC	HC	TCGA-BH-A0DK-11	TCGA-BH-A0DK	HC	HC
TCGA-BH-A1EV-11	TCGA-BH-A1EV	HC	HC	TCGA-BH-A18Q-11	TCGA-BH-A18Q	HC	HC	TCGA-BH-A1EV-11	TCGA-BH-A1EV	HC	HC	TCGA-BH-A0DK-01	TCGA-BH-A0DK	II	Early
TCGA-BH-A1EW-11	TCGA-BH-A1EW	HC	HC	TCGA-BH-A18R-11	TCGA-BH-A18R	HC	HC	TCGA-BH-A1EW-11	TCGA-BH-A1EW	HC	HC	TCGA-BH-A0DL-11	TCGA-BH-A0DL	HC	HC
TCGA-BH-A1F0-11	TCGA-BH-A1F0	HC	HC	TCGA-BH-A18S-11	TCGA-BH-A18S	HC	HC	TCGA-BH-A1F0-11	TCGA-BH-A1F0	HC	HC	TCGA-BH-A0DL-01	TCGA-BH-A0DL	II	Early
TCGA-BH-A1F2-11	TCGA-BH-A1F2	HC	HC	TCGA-BH-A18U-11	TCGA-BH-A18U	HC	HC	TCGA-BH-A1F2-11	TCGA-BH-A1F2	HC	HC	TCGA-BH-A0DO-11	TCGA-BH-A0DO	HC	HC
TCGA-BH-A1F6-11	TCGA-BH-A1F6	HC	HC	TCGA-BH-A18V-11	TCGA-BH-A18V	HC	HC	TCGA-BH-A1F6-11	TCGA-BH-A1F6	HC	HC	TCGA-BH-A0DO-01	TCGA-BH-A0DO	I	Early
TCGA-BH-A1F8-11	TCGA-BH-A1F8	HC	HC	TCGA-BH-A1EN-11	TCGA-BH-A1EN	HC	HC	TCGA-BH-A1F8-11	TCGA-BH-A1F8	HC	HC	TCGA-BH-A0DP-11	TCGA-BH-A0DP	HC	HC
TCGA-BH-A1FB-11	TCGA-BH-A1FB	HC	HC	TCGA-BH-A1EO-11	TCGA-BH-A1EO	HC	HC	TCGA-BH-A1FB-11	TCGA-BH-A1FB	HC	HC	TCGA-BH-A0DP-01	TCGA-BH-A0DP	II	Early
TCGA-BH-A1FC-11	TCGA-BH-A1FC	HC	HC	TCGA-BH-A1ET-11	TCGA-BH-A1ET	HC	HC	TCGA-BH-A1FC-11	TCGA-BH-A1FC	HC	HC	TCGA-BH-A0DQ-11	TCGA-BH-A0DQ	HC	HC
TCGA-BH-A1FD-11	TCGA-BH-A1FD	HC	HC	TCGA-BH-A1EU-11	TCGA-BH-A1EU	HC	HC	TCGA-BH-A1FD-11	TCGA-BH-A1FD	HC	HC	TCGA-BH-A0DQ-01	TCGA-BH-A0DQ	II	Early
TCGA-BH-A1FE-11	TCGA-BH-A1FE	HC	HC	TCGA-BH-A1EV-11	TCGA-BH-A1EV	HC	HC	TCGA-BH-A1FE-11	TCGA-BH-A1FE	HC	HC	TCGA-BH-A0DT-11	TCGA-BH-A0DT	HC	HC
TCGA-BH-A1FG-11	TCGA-BH-A1FG	HC	HC	TCGA-BH-A1EW-11	TCGA-BH-A1EW	HC	HC	TCGA-BH-A1FG-11	TCGA-BH-A1FG	HC	HC	TCGA-BH-A0DT-01	TCGA-BH-A0DT	II	Early
TCGA-BH-A1FH-11	TCGA-BH-A1FH	HC	HC	TCGA-BH-A1F0-11	TCGA-BH-A1F0	HC	HC	TCGA-BH-A1FH-11	TCGA-BH-A1FH	HC	HC	TCGA-BH-A0DV-11	TCGA-BH-A0DV	HC	HC
TCGA-BH-A1FJ-11	TCGA-BH-A1FJ	HC	HC	TCGA-BH-A1F2-11	TCGA-BH-A1F2	HC	HC	TCGA-BH-A1FJ-11	TCGA-BH-A1FJ	HC	HC	TCGA-BH-A0DV-01	TCGA-BH-A0DV	III	Advanced
TCGA-BH-A1FM-11	TCGA-BH-A1FM	HC	HC	TCGA-BH-A1F6-11	TCGA-BH-A1F6	HC	HC	TCGA-BH-A1FM-11	TCGA-BH-A1FM	HC	HC	TCGA-BH-A0DZ-11	TCGA-BH-A0DZ	HC	HC
TCGA-BH-A1FN-11	TCGA-BH-A1FN	HC	HC	TCGA-BH-A1F8-11	TCGA-BH-A1F8	HC	HC	TCGA-BH-A1FN-11	TCGA-BH-A1FN	HC	HC	TCGA-BH-A0DZ-01	TCGA-BH-A0DZ	II	Early
TCGA-BH-A1FR-11	TCGA-BH-A1FR	HC	HC	TCGA-BH-A1FB-11	TCGA-BH-A1FB	HC	HC	TCGA-BH-A1FR-11	TCGA-BH-A1FR	HC	HC	TCGA-BH-A0E1-11	TCGA-BH-A0E1	HC	HC
TCGA-BH-A1FU-11	TCGA-BH-A1FU	HC	HC	TCGA-BH-A1FC-11	TCGA-BH-A1FC	HC	HC	TCGA-BH-A1FU-11	TCGA-BH-A1FU	HC	HC	TCGA-BH-A0E1-01	TCGA-BH-A0E1	II	Early
TCGA-BH-A203-11	TCGA-BH-A203	HC	HC	TCGA-BH-A1FD-11	TCGA-BH-A1FD	HC	HC	TCGA-BH-A203-11	TCGA-BH-A203	HC	HC	TCGA-BH-A0H5-11	TCGA-BH-A0H5	HC	HC
TCGA-BH-A204-11	TCGA-BH-A204	HC	HC	TCGA-BH-A1FE-11	TCGA-BH-A1FE	HC	HC	TCGA-BH-A204-11	TCGA-BH-A204	HC	HC	TCGA-BH-A0H5-01	TCGA-BH-A0H5	I	Early
TCGA-BH-A208-11	TCGA-BH-A208	HC	HC	TCGA-BH-A1FG-11	TCGA-BH-A1FG	HC	HC	TCGA-BH-A208-11	TCGA-BH-A208	HC	HC	TCGA-BH-A0H7-11	TCGA-BH-A0H7	HC	HC
TCGA-BH-A209-11	TCGA-BH-A209	HC	HC	TCGA-BH-A1FH-11	TCGA-BH-A1FH	HC	HC	TCGA-BH-A209-11	TCGA-BH-A209	HC	HC	TCGA-BH-A0H7-01	TCGA-BH-A0H7	III	Advanced
TCGA-E2-A153-11	TCGA-E2-A153	HC	HC	TCGA-BH-A1FJ-11	TCGA-BH-A1FJ	HC	HC	TCGA-E2-A153-11	TCGA-E2-A153	HC	HC	TCGA-BH-A0HA-11	TCGA-BH-A0HA	HC	HC
TCGA-E2-A158-11	TCGA-E2-A158	HC	HC	TCGA-BH-A1FM-11	TCGA-BH-A1FM	HC	HC	TCGA-E2-A158-11	TCGA-E2-A158	HC	HC	TCGA-BH-A0HA-01	TCGA-BH-A0HA	I	Early
TCGA-E2-A15I-11	TCGA-E2-A15I	HC	HC	TCGA-BH-A1FN-11	TCGA-BH-A1FN	HC	HC	TCGA-E2-A15I-11	TCGA-E2-A15I	HC	HC	TCGA-BH-A0HK-11	TCGA-BH-A0HK	HC	HC
TCGA-E2-A15K-11	TCGA-E2-A15K	HC	HC	TCGA-BH-A1FR-11	TCGA-BH-A1FR	HC	HC	TCGA-E2-A15K-11	TCGA-E2-A15K	HC	HC	TCGA-BH-A0HK-01	TCGA-BH-A0HK	II	Early
TCGA-E2-A15M-11	TCGA-E2-A15M	HC	HC	TCGA-BH-A1FU-11	TCGA-BH-A1FU	HC	HC	TCGA-E2-A15M-11	TCGA-E2-A15M	HC	HC	TCGA-BH-A18J-11	TCGA-BH-A18J	HC	HC
TCGA-E2-A1BC-11	TCGA-E2-A1BC	HC	HC	TCGA-BH-A203-11	TCGA-BH-A203	HC	HC	TCGA-E2-A1BC-11	TCGA-E2-A1BC	HC	HC	TCGA-BH-A18J-01	TCGA-BH-A18J	IV	Advanced
TCGA-E2-A1IG-11	TCGA-E2-A1IG	HC	HC	TCGA-BH-A204-11	TCGA-BH-A204	HC	HC	TCGA-E2-A1IG-11	TCGA-E2-A1IG	HC	HC	TCGA-BH-A18K-11	TCGA-BH-A18K	HC	HC
TCGA-E2-A1L7-11	TCGA-E2-A1L7	HC	HC	TCGA-BH-A208-11	TCGA-BH-A208	HC	HC	TCGA-E2-A1L7-11	TCGA-E2-A1L7	HC	HC	TCGA-BH-A18K-01	TCGA-BH-A18K	I	Early
TCGA-E2-A1LB-11	TCGA-E2-A1LB	HC	HC	TCGA-BH-A209-11	TCGA-BH-A209	HC	HC	TCGA-E2-A1LB-11	TCGA-E2-A1LB	HC	HC	TCGA-BH-A18L-11	TCGA-BH-A18L	HC	HC
TCGA-E2-A1LH-11	TCGA-E2-A1LH	HC	HC	TCGA-E2-A153-11	TCGA-E2-A153	HC	HC	TCGA-E2-A1LH-11	TCGA-E2-A1LH	HC	HC	TCGA-BH-A18L-01	TCGA-BH-A18L	III	Advanced
TCGA-E2-A1LS-11	TCGA-E2-A1LS	HC	HC	TCGA-E2-A158-11	TCGA-E2-A158	HC	HC	TCGA-E2-A1LS-11	TCGA-E2-A1LS	HC	HC	TCGA-BH-A18M-11	TCGA-BH-A18M	HC	HC
TCGA-E9-A1N4-11	TCGA-E9-A1N4	HC	HC	TCGA-E2-A15I-11	TCGA-E2-A15I	HC	HC	TCGA-E9-A1N4-11	TCGA-E9-A1N4	HC	HC	TCGA-BH-A18M-01	TCGA-BH-A18M	III	Advanced
TCGA-E9-A1N5-11	TCGA-E9-A1N5	HC	HC	TCGA-E2-A15K-11	TCGA-E2-A15K	HC	HC	TCGA-E9-A1N5-11	TCGA-E9-A1N5	HC	HC	TCGA-BH-A18N-11	TCGA-BH-A18N	HC	HC
TCGA-E9-A1N6-11	TCGA-E9-A1N6	HC	HC	TCGA-E2-A15M-11	TCGA-E2-A15M	HC	HC	TCGA-E9-A1N6-11	TCGA-E9-A1N6	HC	HC	TCGA-BH-A18N-01	TCGA-BH-A18N	II	Early
TCGA-E9-A1N9-11	TCGA-E9-A1N9	HC	HC	TCGA-E2-A1BC-11	TCGA-E2-A1BC	HC	HC	TCGA-E9-A1N9-11	TCGA-E9-A1N9	HC	HC	TCGA-BH-A18P-11	TCGA-BH-A18P	HC	HC
TCGA-E9-A1NA-11	TCGA-E9-A1NA	HC	HC	TCGA-E2-A1IG-11	TCGA-E2-A1IG	HC	HC	TCGA-E9-A1NA-11	TCGA-E9-A1NA	HC	HC	TCGA-BH-A18P-01	TCGA-BH-A18P	I	Early
TCGA-E9-A1ND-11	TCGA-E9-A1ND	HC	HC	TCGA-E2-A1L7-11	TCGA-E2-A1L7	HC	HC	TCGA-E9-A1ND-11	TCGA-E9-A1ND	HC	HC	TCGA-BH-A18Q-11	TCGA-BH-A18Q	HC	HC
TCGA-E9-A1NF-11	TCGA-E9-A1NF	HC	HC	TCGA-E2-A1LB-11	TCGA-E2-A1LB	HC	HC	TCGA-E9-A1NF-11	TCGA-E9-A1NF	HC	HC	TCGA-BH-A18Q-01	TCGA-BH-A18Q	II	Early
TCGA-E9-A1NG-11	TCGA-E9-A1NG	HC	HC	TCGA-E2-A1LH-11	TCGA-E2-A1LH	HC	HC	TCGA-E9-A1NG-11	TCGA-E9-A1NG	HC	HC	TCGA-BH-A18R-11	TCGA-BH-A18R	HC	HC
TCGA-E9-A1R7-11	TCGA-E9-A1R7	HC	HC	TCGA-E2-A1LS-11	TCGA-E2-A1LS	HC	HC	TCGA-E9-A1R7-11	TCGA-E9-A1R7	HC	HC	TCGA-BH-A18R-01	TCGA-BH-A18R	II	Early
TCGA-E9-A1RB-11	TCGA-E9-A1RB	HC	HC	TCGA-E9-A1N4-11	TCGA-E9-A1N4	HC	HC	TCGA-E9-A1RB-11	TCGA-E9-A1RB	HC	HC	TCGA-BH-A18S-11	TCGA-BH-A18S	HC	HC
TCGA-E9-A1RC-11	TCGA-E9-A1RC	HC	HC	TCGA-E9-A1N5-11	TCGA-E9-A1N5	HC	HC	TCGA-E9-A1RC-11	TCGA-E9-A1RC	HC	HC	TCGA-BH-A18S-01	TCGA-BH-A18S	I	Early
TCGA-E9-A1RD-11	TCGA-E9-A1RD	HC	HC	TCGA-E9-A1N6-11	TCGA-E9-A1N6	HC	HC	TCGA-E9-A1RD-11	TCGA-E9-A1RD	HC	HC	TCGA-BH-A18U-11	TCGA-BH-A18U	HC	HC
TCGA-E9-A1RF-11	TCGA-E9-A1RF	HC	HC	TCGA-E9-A1N9-11	TCGA-E9-A1N9	HC	HC	TCGA-E9-A1RF-11	TCGA-E9-A1RF	HC	HC	TCGA-BH-A18U-01	TCGA-BH-A18U	III	Advanced
TCGA-E9-A1RH-11	TCGA-E9-A1RH	HC	HC	TCGA-E9-A1NA-11	TCGA-E9-A1NA	HC	HC	TCGA-E9-A1RH-11	TCGA-E9-A1RH	HC	HC	TCGA-BH-A1EN-11	TCGA-BH-A1EN	HC	HC
TCGA-E9-A1RI-11	TCGA-E9-A1RI	HC	HC	TCGA-E9-A1ND-11	TCGA-E9-A1ND	HC	HC	TCGA-E9-A1RI-11	TCGA-E9-A1RI	HC	HC	TCGA-BH-A1EN-01	TCGA-BH-A1EN	II	Early
TCGA-GI-A2C8-11	TCGA-GI-A2C8	HC	HC	TCGA-E9-A1NF-11	TCGA-E9-A1NF	HC	HC	TCGA-GI-A2C8-11	TCGA-GI-A2C8	HC	HC	TCGA-BH-A1EO-11	TCGA-BH-A1EO	HC	HC
TCGA-GI-A2C9-11	TCGA-GI-A2C9	HC	HC	TCGA-E9-A1NG-11	TCGA-E9-A1NG	HC	HC	TCGA-GI-A2C9-11	TCGA-GI-A2C9	HC	HC	TCGA-BH-A1EO-01	TCGA-BH-A1EO	II	Early
TCGA-3C-AALK-01	TCGA-3C-AALK	I	Early	TCGA-E9-A1R7-11	TCGA-E9-A1R7	HC	HC	TCGA-3C-AALK-01	TCGA-3C-AALK	I	Early	TCGA-BH-A1ET-11	TCGA-BH-A1ET	HC	HC
TCGA-A1-A0SB-01	TCGA-A1-A0SB	I	Early	TCGA-E9-A1RB-11	TCGA-E9-A1RB	HC	HC	TCGA-A1-A0SB-01	TCGA-A1-A0SB	I	Early	TCGA-BH-A1ET-01	TCGA-BH-A1ET	I	Early
TCGA-A1-A0SE-01	TCGA-A1-A0SE	I	Early	TCGA-E9-A1RC-11	TCGA-E9-A1RC	HC	HC	TCGA-A1-A0SE-01	TCGA-A1-A0SE	I	Early	TCGA-BH-A1EU-11	TCGA-BH-A1EU	HC	HC
TCGA-A2-A04N-01	TCGA-A2-A04N	I	Early	TCGA-E9-A1RD-11	TCGA-E9-A1RD	HC	HC	TCGA-A2-A04N-01	TCGA-A2-A04N	I	Early	TCGA-BH-A1EU-01	TCGA-BH-A1EU	I	Early
TCGA-A2-A04Q-01	TCGA-A2-A04Q	I	Early	TCGA-E9-A1RF-11	TCGA-E9-A1RF	HC	HC	TCGA-A2-A04Q-01	TCGA-A2-A04Q	I	Early	TCGA-BH-A1EV-11	TCGA-BH-A1EV	HC	HC
TCGA-A2-A04R-01	TCGA-A2-A04R	I	Early	TCGA-E9-A1RH-11	TCGA-E9-A1RH	HC	HC	TCGA-A2-A04R-01	TCGA-A2-A04R	I	Early	TCGA-BH-A1EV-01	TCGA-BH-A1EV	III	Advanced
TCGA-A2-A0CP-01	TCGA-A2-A0CP	I	Early	TCGA-E9-A1RI-11	TCGA-E9-A1RI	HC	HC	TCGA-A2-A0CP-01	TCGA-A2-A0CP	I	Early	TCGA-BH-A1EW-11	TCGA-BH-A1EW	HC	HC
TCGA-A2-A0CQ-01	TCGA-A2-A0CQ	I	Early	TCGA-GI-A2C8-11	TCGA-GI-A2C8	HC	HC	TCGA-A2-A0CQ-01	TCGA-A2-A0CQ	I	Early	TCGA-BH-A1EW-01	TCGA-BH-A1EW	II	Early
TCGA-A2-A0D3-01	TCGA-A2-A0D3	I	Early	TCGA-GI-A2C9-11	TCGA-GI-A2C9	HC	HC	TCGA-A2-A0D3-01	TCGA-A2-A0D3	I	Early	TCGA-BH-A1F0-11	TCGA-BH-A1F0	HC	HC
TCGA-A2-A0EM-01	TCGA-A2-A0EM	I	Early	TCGA-3C-AALK-01	TCGA-3C-AALK	I	Early	TCGA-A2-A0EM-01	TCGA-A2-A0EM	I	Early	TCGA-BH-A1F0-01	TCGA-BH-A1F0	II	Early
TCGA-A2-A0EO-01	TCGA-A2-A0EO	I	Early	TCGA-A1-A0SB-01	TCGA-A1-A0SB	I	Early	TCGA-A2-A0EO-01	TCGA-A2-A0EO	I	Early	TCGA-BH-A1F2-11	TCGA-BH-A1F2	HC	HC
TCGA-A2-A0EP-01	TCGA-A2-A0EP	I	Early	TCGA-A1-A0SE-01	TCGA-A1-A0SE	I	Early	TCGA-A2-A0EP-01	TCGA-A2-A0EP	I	Early	TCGA-BH-A1F2-01	TCGA-BH-A1F2	III	Advanced
TCGA-A2-A0ER-01	TCGA-A2-A0ER	I	Early	TCGA-A2-A04N-01	TCGA-A2-A04N	I	Early	TCGA-A2-A0ER-01	TCGA-A2-A0ER	I	Early	TCGA-BH-A1F6-11	TCGA-BH-A1F6	HC	HC
TCGA-A2-A0EU-01	TCGA-A2-A0EU	I	Early	TCGA-A2-A04Q-01	TCGA-A2-A04Q	I	Early	TCGA-A2-A0EU-01	TCGA-A2-A0EU	I	Early	TCGA-BH-A1F6-01	TCGA-BH-A1F6	TNS	TNS
TCGA-A2-A0EV-01	TCGA-A2-A0EV	I	Early	TCGA-A2-A04R-01	TCGA-A2-A04R	I	Early	TCGA-A2-A0EV-01	TCGA-A2-A0EV	I	Early	TCGA-BH-A1F8-11	TCGA-BH-A1F8	HC	HC
TCGA-A2-A0SX-01	TCGA-A2-A0SX	I	Early	TCGA-A2-A0CP-01	TCGA-A2-A0CP	I	Early	TCGA-A2-A0SX-01	TCGA-A2-A0SX	I	Early	TCGA-BH-A1F8-01	TCGA-BH-A1F8	III	Advanced
TCGA-A2-A0T3-01	TCGA-A2-A0T3	I	Early	TCGA-A2-A0CQ-01	TCGA-A2-A0CQ	I	Early	TCGA-A2-A0T3-01	TCGA-A2-A0T3	I	Early	TCGA-BH-A1FB-11	TCGA-BH-A1FB	HC	HC
TCGA-A2-A0YF-01	TCGA-A2-A0YF	I	Early	TCGA-A2-A0D3-01	TCGA-A2-A0D3	I	Early	TCGA-A2-A0YF-01	TCGA-A2-A0YF	I	Early	TCGA-BH-A1FB-01	TCGA-BH-A1FB	II	Early
TCGA-A2-A0YI-01	TCGA-A2-A0YI	I	Early	TCGA-A2-A0EM-01	TCGA-A2-A0EM	I	Early	TCGA-A2-A0YI-01	TCGA-A2-A0YI	I	Early	TCGA-BH-A1FC-11	TCGA-BH-A1FC	HC	HC
TCGA-A2-A259-01	TCGA-A2-A259	I	Early	TCGA-A2-A0EO-01	TCGA-A2-A0EO	I	Early	TCGA-A2-A259-01	TCGA-A2-A259	I	Early	TCGA-BH-A1FC-01	TCGA-BH-A1FC	II	Early
TCGA-A2-A3XZ-01	TCGA-A2-A3XZ	I	Early	TCGA-A2-A0EP-01	TCGA-A2-A0EP	I	Early	TCGA-A2-A3XZ-01	TCGA-A2-A3XZ	I	Early	TCGA-BH-A1FE-11	TCGA-BH-A1FE	HC	HC
TCGA-A7-A0CD-01	TCGA-A7-A0CD	I	Early	TCGA-A2-A0ER-01	TCGA-A2-A0ER	I	Early	TCGA-A7-A0CD-01	TCGA-A7-A0CD	I	Early	TCGA-BH-A1FE-01	TCGA-BH-A1FE	II	Early
TCGA-A7-A0DC-01	TCGA-A7-A0DC	I	Early	TCGA-A2-A0EU-01	TCGA-A2-A0EU	I	Early	TCGA-A7-A0DC-01	TCGA-A7-A0DC	I	Early	TCGA-BH-A1FG-11	TCGA-BH-A1FG	HC	HC
TCGA-A7-A26F-01	TCGA-A7-A26F	I	Early	TCGA-A2-A0EV-01	TCGA-A2-A0EV	I	Early	TCGA-A7-A26F-01	TCGA-A7-A26F	I	Early	TCGA-BH-A1FG-01	TCGA-BH-A1FG	I	Early
TCGA-A7-A3IY-01	TCGA-A7-A3IY	I	Early	TCGA-A2-A0SX-01	TCGA-A2-A0SX	I	Early	TCGA-A7-A3IY-01	TCGA-A7-A3IY	I	Early	TCGA-BH-A1FH-11	TCGA-BH-A1FH	HC	HC
TCGA-A7-A3J1-01	TCGA-A7-A3J1	I	Early	TCGA-A2-A0T3-01	TCGA-A2-A0T3	I	Early	TCGA-A7-A3J1-01	TCGA-A7-A3J1	I	Early	TCGA-BH-A1FH-01	TCGA-BH-A1FH	IV	Advanced
TCGA-A8-A06O-01	TCGA-A8-A06O	I	Early	TCGA-A2-A0YF-01	TCGA-A2-A0YF	I	Early	TCGA-A8-A06O-01	TCGA-A8-A06O	I	Early	TCGA-BH-A1FJ-11	TCGA-BH-A1FJ	HC	HC
TCGA-A8-A08A-01	TCGA-A8-A08A	I	Early	TCGA-A2-A0YI-01	TCGA-A2-A0YI	I	Early	TCGA-A8-A08A-01	TCGA-A8-A08A	I	Early	TCGA-BH-A1FJ-01	TCGA-BH-A1FJ	III	Advanced
TCGA-A8-A095-01	TCGA-A8-A095	I	Early	TCGA-A2-A259-01	TCGA-A2-A259	I	Early	TCGA-A8-A095-01	TCGA-A8-A095	I	Early	TCGA-BH-A1FM-11	TCGA-BH-A1FM	HC	HC
TCGA-A8-A0AD-01	TCGA-A8-A0AD	I	Early	TCGA-A2-A3XZ-01	TCGA-A2-A3XZ	I	Early	TCGA-A8-A0AD-01	TCGA-A8-A0AD	I	Early	TCGA-BH-A1FM-01	TCGA-BH-A1FM	III	Advanced
TCGA-AC-A3QQ-01	TCGA-AC-A3QQ	I	Early	TCGA-A7-A0CD-01	TCGA-A7-A0CD	I	Early	TCGA-AC-A3QQ-01	TCGA-AC-A3QQ	I	Early	TCGA-BH-A1FN-11	TCGA-BH-A1FN	HC	HC
TCGA-AC-A5EI-01	TCGA-AC-A5EI	I	Early	TCGA-A7-A0DC-01	TCGA-A7-A0DC	I	Early	TCGA-AC-A8OP-01	TCGA-AC-A8OP	I	Early	TCGA-BH-A1FN-01	TCGA-BH-A1FN	II	Early
TCGA-AC-A8OP-01	TCGA-AC-A8OP	I	Early	TCGA-A7-A26F-01	TCGA-A7-A26F	I	Early	TCGA-AC-A8OR-01	TCGA-AC-A8OR	I	Early	TCGA-BH-A1FR-11	TCGA-BH-A1FR	HC	HC
TCGA-AC-A8OR-01	TCGA-AC-A8OR	I	Early	TCGA-A7-A3IY-01	TCGA-A7-A3IY	I	Early	TCGA-AN-A0FF-01	TCGA-AN-A0FF	I	Early	TCGA-BH-A1FR-01	TCGA-BH-A1FR	III	Advanced
TCGA-AN-A0FF-01	TCGA-AN-A0FF	I	Early	TCGA-A7-A3J1-01	TCGA-A7-A3J1	I	Early	TCGA-AN-A0FN-01	TCGA-AN-A0FN	I	Early	TCGA-BH-A1FU-11	TCGA-BH-A1FU	HC	HC
TCGA-AN-A0FN-01	TCGA-AN-A0FN	I	Early	TCGA-A8-A06O-01	TCGA-A8-A06O	I	Early	TCGA-AN-A0FS-01	TCGA-AN-A0FS	I	Early	TCGA-BH-A1FU-01	TCGA-BH-A1FU	I	Early
TCGA-AN-A0FS-01	TCGA-AN-A0FS	I	Early	TCGA-A8-A08A-01	TCGA-A8-A08A	I	Early	TCGA-AN-A0FY-01	TCGA-AN-A0FY	I	Early	TCGA-BH-A203-11	TCGA-BH-A203	HC	HC
TCGA-AN-A0FY-01	TCGA-AN-A0FY	I	Early	TCGA-A8-A095-01	TCGA-A8-A095	I	Early	TCGA-AO-A03M-01	TCGA-AO-A03M	I	Early	TCGA-BH-A203-01	TCGA-BH-A203	II	Early
TCGA-AO-A03M-01	TCGA-AO-A03M	I	Early	TCGA-A8-A0AD-01	TCGA-A8-A0AD	I	Early	TCGA-AO-A03U-01	TCGA-AO-A03U	I	Early	TCGA-BH-A204-11	TCGA-BH-A204	HC	HC
TCGA-AO-A03U-01	TCGA-AO-A03U	I	Early	TCGA-AC-A3QQ-01	TCGA-AC-A3QQ	I	Early	TCGA-AO-A03V-01	TCGA-AO-A03V	I	Early	TCGA-BH-A204-01	TCGA-BH-A204	II	Early
TCGA-AO-A03V-01	TCGA-AO-A03V	I	Early	TCGA-AC-A8OP-01	TCGA-AC-A8OP	I	Early	TCGA-AO-A0J2-01	TCGA-AO-A0J2	I	Early	TCGA-BH-A208-11	TCGA-BH-A208	HC	HC
TCGA-AO-A0J2-01	TCGA-AO-A0J2	I	Early	TCGA-AC-A8OR-01	TCGA-AC-A8OR	I	Early	TCGA-AO-A0J4-01	TCGA-AO-A0J4	I	Early	TCGA-BH-A208-01	TCGA-BH-A208	II	Early
TCGA-AO-A0J4-01	TCGA-AO-A0J4	I	Early	TCGA-AN-A0FF-01	TCGA-AN-A0FF	I	Early	TCGA-AR-A1AJ-01	TCGA-AR-A1AJ	I	Early	TCGA-BH-A209-11	TCGA-BH-A209	HC	HC
TCGA-AR-A1AJ-01	TCGA-AR-A1AJ	I	Early	TCGA-AN-A0FN-01	TCGA-AN-A0FN	I	Early	TCGA-AR-A1AK-01	TCGA-AR-A1AK	I	Early	TCGA-BH-A209-01	TCGA-BH-A209	I	Early
TCGA-AR-A1AK-01	TCGA-AR-A1AK	I	Early	TCGA-AN-A0FS-01	TCGA-AN-A0FS	I	Early	TCGA-AR-A1AP-01	TCGA-AR-A1AP	I	Early	TCGA-E2-A153-11	TCGA-E2-A153	HC	HC
TCGA-AR-A1AP-01	TCGA-AR-A1AP	I	Early	TCGA-AN-A0FY-01	TCGA-AN-A0FY	I	Early	TCGA-AR-A1AX-01	TCGA-AR-A1AX	I	Early	TCGA-E2-A153-01	TCGA-E2-A153	II	Early
TCGA-AR-A1AX-01	TCGA-AR-A1AX	I	Early	TCGA-AO-A03M-01	TCGA-AO-A03M	I	Early	TCGA-AR-A1AY-01	TCGA-AR-A1AY	I	Early	TCGA-E2-A158-11	TCGA-E2-A158	HC	HC
TCGA-AR-A1AY-01	TCGA-AR-A1AY	I	Early	TCGA-AO-A03U-01	TCGA-AO-A03U	I	Early	TCGA-AR-A24N-01	TCGA-AR-A24N	I	Early	TCGA-E2-A158-01	TCGA-E2-A158	II	Early
TCGA-AR-A24N-01	TCGA-AR-A24N	I	Early	TCGA-AO-A03V-01	TCGA-AO-A03V	I	Early	TCGA-AR-A24P-01	TCGA-AR-A24P	I	Early	TCGA-E2-A15I-11	TCGA-E2-A15I	HC	HC
TCGA-AR-A24P-01	TCGA-AR-A24P	I	Early	TCGA-AO-A0J2-01	TCGA-AO-A0J2	I	Early	TCGA-AR-A24S-01	TCGA-AR-A24S	I	Early	TCGA-E2-A15I-01	TCGA-E2-A15I	II	Early
TCGA-AR-A24S-01	TCGA-AR-A24S	I	Early	TCGA-AO-A0J4-01	TCGA-AO-A0J4	I	Early	TCGA-AR-A252-01	TCGA-AR-A252	I	Early	TCGA-E2-A15K-11	TCGA-E2-A15K	HC	HC
TCGA-AR-A252-01	TCGA-AR-A252	I	Early	TCGA-AR-A1AJ-01	TCGA-AR-A1AJ	I	Early	TCGA-AR-A255-01	TCGA-AR-A255	I	Early	TCGA-E2-A15K-01	TCGA-E2-A15K	II	Early
TCGA-AR-A255-01	TCGA-AR-A255	I	Early	TCGA-AR-A1AK-01	TCGA-AR-A1AK	I	Early	TCGA-AR-A2LE-01	TCGA-AR-A2LE	I	Early	TCGA-E2-A15M-11	TCGA-E2-A15M	HC	HC
TCGA-AR-A2LE-01	TCGA-AR-A2LE	I	Early	TCGA-AR-A1AP-01	TCGA-AR-A1AP	I	Early	TCGA-AR-A2LR-01	TCGA-AR-A2LR	I	Early	TCGA-E2-A15M-01	TCGA-E2-A15M	II	Early
TCGA-AR-A2LR-01	TCGA-AR-A2LR	I	Early	TCGA-AR-A1AX-01	TCGA-AR-A1AX	I	Early	TCGA-B6-A0I2-01	TCGA-B6-A0I2	I	Early	TCGA-E2-A1BC-11	TCGA-E2-A1BC	HC	HC
TCGA-B6-A0I2-01	TCGA-B6-A0I2	I	Early	TCGA-AR-A1AY-01	TCGA-AR-A1AY	I	Early	TCGA-B6-A0IP-01	TCGA-B6-A0IP	I	Early	TCGA-E2-A1BC-01	TCGA-E2-A1BC	I	Early
TCGA-B6-A0IP-01	TCGA-B6-A0IP	I	Early	TCGA-AR-A24N-01	TCGA-AR-A24N	I	Early	TCGA-B6-A0RN-01	TCGA-B6-A0RN	I	Early	TCGA-E2-A1IG-11	TCGA-E2-A1IG	HC	HC
TCGA-B6-A0RN-01	TCGA-B6-A0RN	I	Early	TCGA-AR-A24P-01	TCGA-AR-A24P	I	Early	TCGA-B6-A0RU-01	TCGA-B6-A0RU	I	Early	TCGA-E2-A1IG-01	TCGA-E2-A1IG	II	Early
TCGA-B6-A0RU-01	TCGA-B6-A0RU	I	Early	TCGA-AR-A24S-01	TCGA-AR-A24S	I	Early	TCGA-B6-A0X0-01	TCGA-B6-A0X0	I	Early	TCGA-E2-A1L7-11	TCGA-E2-A1L7	HC	HC
TCGA-B6-A0X0-01	TCGA-B6-A0X0	I	Early	TCGA-AR-A252-01	TCGA-AR-A252	I	Early	TCGA-B6-A1KI-01	TCGA-B6-A1KI	I	Early	TCGA-E2-A1L7-01	TCGA-E2-A1L7	III	Advanced
TCGA-B6-A1KI-01	TCGA-B6-A1KI	I	Early	TCGA-AR-A255-01	TCGA-AR-A255	I	Early	TCGA-B6-A402-01	TCGA-B6-A402	I	Early	TCGA-E2-A1LB-11	TCGA-E2-A1LB	HC	HC
TCGA-B6-A402-01	TCGA-B6-A402	I	Early	TCGA-AR-A2LE-01	TCGA-AR-A2LE	I	Early	TCGA-B6-A40B-01	TCGA-B6-A40B	I	Early	TCGA-E2-A1LB-01	TCGA-E2-A1LB	II	Early
TCGA-B6-A40B-01	TCGA-B6-A40B	I	Early	TCGA-AR-A2LR-01	TCGA-AR-A2LR	I	Early	TCGA-BH-A0AV-01	TCGA-BH-A0AV	I	Early	TCGA-E2-A1LH-11	TCGA-E2-A1LH	HC	HC
TCGA-BH-A0AV-01	TCGA-BH-A0AV	I	Early	TCGA-B6-A0I2-01	TCGA-B6-A0I2	I	Early	TCGA-BH-A0B0-01	TCGA-BH-A0B0	I	Early	TCGA-E2-A1LH-01	TCGA-E2-A1LH	I	Early
TCGA-BH-A0B0-01	TCGA-BH-A0B0	I	Early	TCGA-B6-A0IP-01	TCGA-B6-A0IP	I	Early	TCGA-BH-A0B6-01	TCGA-BH-A0B6	I	Early	TCGA-E2-A1LS-11	TCGA-E2-A1LS	HC	HC
TCGA-BH-A0B6-01	TCGA-BH-A0B6	I	Early	TCGA-B6-A0RN-01	TCGA-B6-A0RN	I	Early	TCGA-BH-A0B8-01	TCGA-BH-A0B8	I	Early	TCGA-E2-A1LS-01	TCGA-E2-A1LS	I	Early
TCGA-BH-A0B8-01	TCGA-BH-A0B8	I	Early	TCGA-B6-A0RU-01	TCGA-B6-A0RU	I	Early	TCGA-BH-A0B9-01	TCGA-BH-A0B9	I	Early	TCGA-E9-A1N4-11	TCGA-E9-A1N4	HC	HC
TCGA-BH-A0B9-01	TCGA-BH-A0B9	I	Early	TCGA-B6-A0X0-01	TCGA-B6-A0X0	I	Early	TCGA-BH-A0BG-01	TCGA-BH-A0BG	I	Early	TCGA-E9-A1N4-01	TCGA-E9-A1N4	III	Advanced
TCGA-BH-A0BG-01	TCGA-BH-A0BG	I	Early	TCGA-B6-A1KI-01	TCGA-B6-A1KI	I	Early	TCGA-BH-A0BL-01	TCGA-BH-A0BL	I	Early	TCGA-E9-A1N5-11	TCGA-E9-A1N5	HC	HC
TCGA-BH-A0BL-01	TCGA-BH-A0BL	I	Early	TCGA-B6-A402-01	TCGA-B6-A402	I	Early	TCGA-BH-A0BO-01	TCGA-BH-A0BO	I	Early	TCGA-E9-A1N5-01	TCGA-E9-A1N5	II	Early
TCGA-BH-A0BO-01	TCGA-BH-A0BO	I	Early	TCGA-B6-A40B-01	TCGA-B6-A40B	I	Early	TCGA-BH-A0BP-01	TCGA-BH-A0BP	I	Early	TCGA-E9-A1N6-11	TCGA-E9-A1N6	HC	HC
TCGA-BH-A0BP-01	TCGA-BH-A0BP	I	Early	TCGA-BH-A0AV-01	TCGA-BH-A0AV	I	Early	TCGA-BH-A0BQ-01	TCGA-BH-A0BQ	I	Early	TCGA-E9-A1N6-01	TCGA-E9-A1N6	II	Early
TCGA-BH-A0BQ-01	TCGA-BH-A0BQ	I	Early	TCGA-BH-A0B0-01	TCGA-BH-A0B0	I	Early	TCGA-BH-A0BR-01	TCGA-BH-A0BR	I	Early	TCGA-E9-A1N9-11	TCGA-E9-A1N9	HC	HC
TCGA-BH-A0BR-01	TCGA-BH-A0BR	I	Early	TCGA-BH-A0B6-01	TCGA-BH-A0B6	I	Early	TCGA-BH-A0BW-01	TCGA-BH-A0BW	I	Early	TCGA-E9-A1N9-01	TCGA-E9-A1N9	II	Early
TCGA-BH-A0BW-01	TCGA-BH-A0BW	I	Early	TCGA-BH-A0B8-01	TCGA-BH-A0B8	I	Early	TCGA-BH-A0C3-01	TCGA-BH-A0C3	I	Early	TCGA-E9-A1NA-11	TCGA-E9-A1NA	HC	HC
TCGA-BH-A0C3-01	TCGA-BH-A0C3	I	Early	TCGA-BH-A0B9-01	TCGA-BH-A0B9	I	Early	TCGA-BH-A0DO-01	TCGA-BH-A0DO	I	Early	TCGA-E9-A1NA-01	TCGA-E9-A1NA	II	Early
TCGA-BH-A0DO-01	TCGA-BH-A0DO	I	Early	TCGA-BH-A0BG-01	TCGA-BH-A0BG	I	Early	TCGA-BH-A0DX-01	TCGA-BH-A0DX	I	Early	TCGA-E9-A1ND-11	TCGA-E9-A1ND	HC	HC
TCGA-BH-A0DX-01	TCGA-BH-A0DX	I	Early	TCGA-BH-A0BL-01	TCGA-BH-A0BL	I	Early	TCGA-BH-A0E6-01	TCGA-BH-A0E6	I	Early	TCGA-E9-A1ND-01	TCGA-E9-A1ND	II	Early
TCGA-BH-A0E6-01	TCGA-BH-A0E6	I	Early	TCGA-BH-A0BO-01	TCGA-BH-A0BO	I	Early	TCGA-BH-A0H0-01	TCGA-BH-A0H0	I	Early	TCGA-E9-A1NF-11	TCGA-E9-A1NF	HC	HC
TCGA-BH-A0H0-01	TCGA-BH-A0H0	I	Early	TCGA-BH-A0BP-01	TCGA-BH-A0BP	I	Early	TCGA-BH-A0H3-01	TCGA-BH-A0H3	I	Early	TCGA-E9-A1NF-01	TCGA-E9-A1NF	II	Early
TCGA-BH-A0H3-01	TCGA-BH-A0H3	I	Early	TCGA-BH-A0BQ-01	TCGA-BH-A0BQ	I	Early	TCGA-BH-A0H5-01	TCGA-BH-A0H5	I	Early	TCGA-E9-A1NG-11	TCGA-E9-A1NG	HC	HC
TCGA-BH-A0H5-01	TCGA-BH-A0H5	I	Early	TCGA-BH-A0BR-01	TCGA-BH-A0BR	I	Early	TCGA-BH-A0H6-01	TCGA-BH-A0H6	I	Early	TCGA-E9-A1NG-01	TCGA-E9-A1NG	II	Early
TCGA-BH-A0H6-01	TCGA-BH-A0H6	I	Early	TCGA-BH-A0BW-01	TCGA-BH-A0BW	I	Early	TCGA-BH-A0HA-01	TCGA-BH-A0HA	I	Early	TCGA-E9-A1R7-11	TCGA-E9-A1R7	HC	HC
TCGA-BH-A0HA-01	TCGA-BH-A0HA	I	Early	TCGA-BH-A0C3-01	TCGA-BH-A0C3	I	Early	TCGA-BH-A0HB-01	TCGA-BH-A0HB	I	Early	TCGA-E9-A1R7-01	TCGA-E9-A1R7	II	Early
TCGA-BH-A0HB-01	TCGA-BH-A0HB	I	Early	TCGA-BH-A0DO-01	TCGA-BH-A0DO	I	Early	TCGA-BH-A0HF-01	TCGA-BH-A0HF	I	Early	TCGA-E9-A1RB-11	TCGA-E9-A1RB	HC	HC
TCGA-BH-A0HF-01	TCGA-BH-A0HF	I	Early	TCGA-BH-A0DX-01	TCGA-BH-A0DX	I	Early	TCGA-BH-A0HI-01	TCGA-BH-A0HI	I	Early	TCGA-E9-A1RB-01	TCGA-E9-A1RB	II	Early
TCGA-BH-A0HI-01	TCGA-BH-A0HI	I	Early	TCGA-BH-A0E6-01	TCGA-BH-A0E6	I	Early	TCGA-BH-A0HN-01	TCGA-BH-A0HN	I	Early	TCGA-E9-A1RC-11	TCGA-E9-A1RC	HC	HC
TCGA-BH-A0HN-01	TCGA-BH-A0HN	I	Early	TCGA-BH-A0EB-01	TCGA-BH-A0EB	I	Early	TCGA-BH-A0HU-01	TCGA-BH-A0HU	I	Early	TCGA-E9-A1RC-01	TCGA-E9-A1RC	III	Advanced
TCGA-BH-A0HU-01	TCGA-BH-A0HU	I	Early	TCGA-BH-A0H0-01	TCGA-BH-A0H0	I	Early	TCGA-BH-A0HW-01	TCGA-BH-A0HW	I	Early	TCGA-E9-A1RD-11	TCGA-E9-A1RD	HC	HC
TCGA-BH-A0HW-01	TCGA-BH-A0HW	I	Early	TCGA-BH-A0H3-01	TCGA-BH-A0H3	I	Early	TCGA-BH-A0HY-01	TCGA-BH-A0HY	I	Early	TCGA-E9-A1RD-01	TCGA-E9-A1RD	II	Early
TCGA-BH-A0HY-01	TCGA-BH-A0HY	I	Early	TCGA-BH-A0H5-01	TCGA-BH-A0H5	I	Early	TCGA-BH-A0W7-01	TCGA-BH-A0W7	I	Early	TCGA-E9-A1RF-11	TCGA-E9-A1RF	HC	HC
TCGA-BH-A0W7-01	TCGA-BH-A0W7	I	Early	TCGA-BH-A0H6-01	TCGA-BH-A0H6	I	Early	TCGA-BH-A0WA-01	TCGA-BH-A0WA	I	Early	TCGA-E9-A1RF-01	TCGA-E9-A1RF	III	Advanced
TCGA-BH-A0WA-01	TCGA-BH-A0WA	I	Early	TCGA-BH-A0HA-01	TCGA-BH-A0HA	I	Early	TCGA-BH-A18G-01	TCGA-BH-A18G	I	Early	TCGA-E9-A1RH-11	TCGA-E9-A1RH	HC	HC
TCGA-BH-A18G-01	TCGA-BH-A18G	I	Early	TCGA-BH-A0HB-01	TCGA-BH-A0HB	I	Early	TCGA-BH-A18H-01	TCGA-BH-A18H	I	Early	TCGA-E9-A1RH-01	TCGA-E9-A1RH	II	Early
TCGA-BH-A18H-01	TCGA-BH-A18H	I	Early	TCGA-BH-A0HF-01	TCGA-BH-A0HF	I	Early	TCGA-BH-A18K-01	TCGA-BH-A18K	I	Early	TCGA-E9-A1RI-11	TCGA-E9-A1RI	HC	HC
TCGA-BH-A18K-01	TCGA-BH-A18K	I	Early	TCGA-BH-A0HI-01	TCGA-BH-A0HI	I	Early	TCGA-BH-A18P-01	TCGA-BH-A18P	I	Early	TCGA-E9-A1RI-01	TCGA-E9-A1RI	III	Advanced
TCGA-BH-A18P-01	TCGA-BH-A18P	I	Early	TCGA-BH-A0HN-01	TCGA-BH-A0HN	I	Early	TCGA-BH-A18S-01	TCGA-BH-A18S	I	Early	TCGA-GI-A2C8-11	TCGA-GI-A2C8	HC	HC
TCGA-BH-A18S-01	TCGA-BH-A18S	I	Early	TCGA-BH-A0HU-01	TCGA-BH-A0HU	I	Early	TCGA-BH-A1ET-01	TCGA-BH-A1ET	I	Early	TCGA-GI-A2C8-01	TCGA-GI-A2C8	III	Advanced
TCGA-BH-A1ET-01	TCGA-BH-A1ET	I	Early	TCGA-BH-A0HW-01	TCGA-BH-A0HW	I	Early	TCGA-BH-A1EU-01	TCGA-BH-A1EU	I	Early	TCGA-GI-A2C9-11	TCGA-GI-A2C9	HC	HC
TCGA-BH-A1EU-01	TCGA-BH-A1EU	I	Early	TCGA-BH-A0HY-01	TCGA-BH-A0HY	I	Early	TCGA-BH-A1FG-01	TCGA-BH-A1FG	I	Early	TCGA-GI-A2C9-01	TCGA-GI-A2C9	II	Early
TCGA-BH-A1FG-01	TCGA-BH-A1FG	I	Early	TCGA-BH-A0W7-01	TCGA-BH-A0W7	I	Early	TCGA-BH-A1FU-01	TCGA-BH-A1FU	I	Early
TCGA-BH-A1FU-01	TCGA-BH-A1FU	I	Early	TCGA-BH-A0WA-01	TCGA-BH-A0WA	I	Early	TCGA-BH-A201-01	TCGA-BH-A201	I	Early
TCGA-BH-A201-01	TCGA-BH-A201	I	Early	TCGA-BH-A18G-01	TCGA-BH-A18G	I	Early	TCGA-BH-A209-01	TCGA-BH-A209	I	Early
TCGA-BH-A209-01	TCGA-BH-A209	I	Early	TCGA-BH-A18H-01	TCGA-BH-A18H	I	Early	TCGA-BH-A42V-01	TCGA-BH-A42V	I	Early
TCGA-BH-A42V-01	TCGA-BH-A42V	I	Early	TCGA-BH-A18K-01	TCGA-BH-A18K	I	Early	TCGA-BH-A5J0-01	TCGA-BH-A5J0	I	Early
TCGA-BH-A5J0-01	TCGA-BH-A5J0	I	Early	TCGA-BH-A18P-01	TCGA-BH-A18P	I	Early	TCGA-BH-A8FY-01	TCGA-BH-A8FY	I	Early
TCGA-BH-A8FY-01	TCGA-BH-A8FY	I	Early	TCGA-BH-A18S-01	TCGA-BH-A18S	I	Early	TCGA-BH-A8FZ-01	TCGA-BH-A8FZ	I	Early
TCGA-BH-A8FZ-01	TCGA-BH-A8FZ	I	Early	TCGA-BH-A1ET-01	TCGA-BH-A1ET	I	Early	TCGA-C8-A3M8-01	TCGA-C8-A3M8	I	Early
TCGA-C8-A3M8-01	TCGA-C8-A3M8	I	Early	TCGA-BH-A1EU-01	TCGA-BH-A1EU	I	Early	TCGA-D8-A13Y-01	TCGA-D8-A13Y	I	Early
TCGA-D8-A13Y-01	TCGA-D8-A13Y	I	Early	TCGA-BH-A1FD-01	TCGA-BH-A1FD	I	Early	TCGA-D8-A1J9-01	TCGA-D8-A1J9	I	Early
TCGA-D8-A1J9-01	TCGA-D8-A1J9	I	Early	TCGA-BH-A1FG-01	TCGA-BH-A1FG	I	Early	TCGA-D8-A1JH-01	TCGA-D8-A1JH	I	Early
TCGA-D8-A1JH-01	TCGA-D8-A1JH	I	Early	TCGA-BH-A1FU-01	TCGA-BH-A1FU	I	Early	TCGA-D8-A1JP-01	TCGA-D8-A1JP	I	Early
TCGA-D8-A1JP-01	TCGA-D8-A1JP	I	Early	TCGA-BH-A201-01	TCGA-BH-A201	I	Early	TCGA-D8-A1JS-01	TCGA-D8-A1JS	I	Early
TCGA-D8-A1JS-01	TCGA-D8-A1JS	I	Early	TCGA-BH-A209-01	TCGA-BH-A209	I	Early	TCGA-D8-A1JU-01	TCGA-D8-A1JU	I	Early
TCGA-D8-A1JU-01	TCGA-D8-A1JU	I	Early	TCGA-BH-A42V-01	TCGA-BH-A42V	I	Early	TCGA-D8-A1XA-01	TCGA-D8-A1XA	I	Early
TCGA-D8-A1XA-01	TCGA-D8-A1XA	I	Early	TCGA-BH-A5J0-01	TCGA-BH-A5J0	I	Early	TCGA-D8-A1XM-01	TCGA-D8-A1XM	I	Early
TCGA-D8-A1XM-01	TCGA-D8-A1XM	I	Early	TCGA-BH-A8FY-01	TCGA-BH-A8FY	I	Early	TCGA-D8-A1XU-01	TCGA-D8-A1XU	I	Early
TCGA-D8-A1XU-01	TCGA-D8-A1XU	I	Early	TCGA-BH-A8FZ-01	TCGA-BH-A8FZ	I	Early	TCGA-D8-A27E-01	TCGA-D8-A27E	I	Early
TCGA-D8-A27E-01	TCGA-D8-A27E	I	Early	TCGA-C8-A3M8-01	TCGA-C8-A3M8	I	Early	TCGA-D8-A27M-01	TCGA-D8-A27M	I	Early
TCGA-D8-A27M-01	TCGA-D8-A27M	I	Early	TCGA-D8-A13Y-01	TCGA-D8-A13Y	I	Early	TCGA-D8-A27P-01	TCGA-D8-A27P	I	Early
TCGA-D8-A27P-01	TCGA-D8-A27P	I	Early	TCGA-D8-A1J9-01	TCGA-D8-A1J9	I	Early	TCGA-D8-A4Z1-01	TCGA-D8-A4Z1	I	Early
TCGA-D8-A4Z1-01	TCGA-D8-A4Z1	I	Early	TCGA-D8-A1JH-01	TCGA-D8-A1JH	I	Early	TCGA-E2-A106-01	TCGA-E2-A106	I	Early
TCGA-E2-A106-01	TCGA-E2-A106	I	Early	TCGA-D8-A1JP-01	TCGA-D8-A1JP	I	Early	TCGA-E2-A14U-01	TCGA-E2-A14U	I	Early
TCGA-E2-A14S-01	TCGA-E2-A14S	I	Early	TCGA-D8-A1JS-01	TCGA-D8-A1JS	I	Early	TCGA-E2-A14Z-01	TCGA-E2-A14Z	I	Early
TCGA-E2-A14U-01	TCGA-E2-A14U	I	Early	TCGA-D8-A1JU-01	TCGA-D8-A1JU	I	Early	TCGA-E2-A152-01	TCGA-E2-A152	I	Early
TCGA-E2-A14Z-01	TCGA-E2-A14Z	I	Early	TCGA-D8-A1XA-01	TCGA-D8-A1XA	I	Early	TCGA-E2-A154-01	TCGA-E2-A154	I	Early
TCGA-E2-A152-01	TCGA-E2-A152	I	Early	TCGA-D8-A1XM-01	TCGA-D8-A1XM	I	Early	TCGA-E2-A156-01	TCGA-E2-A156	I	Early
TCGA-E2-A154-01	TCGA-E2-A154	I	Early	TCGA-D8-A1XU-01	TCGA-D8-A1XU	I	Early	TCGA-E2-A15C-01	TCGA-E2-A15C	I	Early
TCGA-E2-A156-01	TCGA-E2-A156	I	Early	TCGA-D8-A27E-01	TCGA-D8-A27E	I	Early	TCGA-E2-A15F-01	TCGA-E2-A15F	I	Early
TCGA-E2-A15C-01	TCGA-E2-A15C	I	Early	TCGA-D8-A27M-01	TCGA-D8-A27M	I	Early	TCGA-E2-A15J-01	TCGA-E2-A15J	I	Early
TCGA-E2-A15F-01	TCGA-E2-A15F	I	Early	TCGA-D8-A27P-01	TCGA-D8-A27P	I	Early	TCGA-E2-A15O-01	TCGA-E2-A15O	I	Early
TCGA-E2-A15J-01	TCGA-E2-A15J	I	Early	TCGA-D8-A4Z1-01	TCGA-D8-A4Z1	I	Early	TCGA-E2-A15P-01	TCGA-E2-A15P	I	Early
TCGA-E2-A15O-01	TCGA-E2-A15O	I	Early	TCGA-E2-A106-01	TCGA-E2-A106	I	Early	TCGA-E2-A1BC-01	TCGA-E2-A1BC	I	Early
TCGA-E2-A15P-01	TCGA-E2-A15P	I	Early	TCGA-E2-A14U-01	TCGA-E2-A14U	I	Early	TCGA-E2-A1IF-01	TCGA-E2-A1IF	I	Early
TCGA-E2-A1BC-01	TCGA-E2-A1BC	I	Early	TCGA-E2-A14Z-01	TCGA-E2-A14Z	I	Early	TCGA-E2-A1IH-01	TCGA-E2-A1IH	I	Early
TCGA-E2-A1IF-01	TCGA-E2-A1IF	I	Early	TCGA-E2-A152-01	TCGA-E2-A152	I	Early	TCGA-E2-A1II-01	TCGA-E2-A1II	I	Early
TCGA-E2-A1IH-01	TCGA-E2-A1IH	I	Early	TCGA-E2-A154-01	TCGA-E2-A154	I	Early	TCGA-E2-A1IJ-01	TCGA-E2-A1IJ	I	Early
TCGA-E2-A1II-01	TCGA-E2-A1II	I	Early	TCGA-E2-A156-01	TCGA-E2-A156	I	Early	TCGA-E2-A1IN-01	TCGA-E2-A1IN	I	Early
TCGA-E2-A1IJ-01	TCGA-E2-A1IJ	I	Early	TCGA-E2-A15C-01	TCGA-E2-A15C	I	Early	TCGA-E2-A1IO-01	TCGA-E2-A1IO	I	Early
TCGA-E2-A1IN-01	TCGA-E2-A1IN	I	Early	TCGA-E2-A15F-01	TCGA-E2-A15F	I	Early	TCGA-E2-A1IU-01	TCGA-E2-A1IU	I	Early
TCGA-E2-A1IO-01	TCGA-E2-A1IO	I	Early	TCGA-E2-A15J-01	TCGA-E2-A15J	I	Early	TCGA-E2-A1LH-01	TCGA-E2-A1LH	I	Early
TCGA-E2-A1IU-01	TCGA-E2-A1IU	I	Early	TCGA-E2-A15O-01	TCGA-E2-A15O	I	Early	TCGA-E2-A1LS-01	TCGA-E2-A1LS	I	Early
TCGA-E2-A1LH-01	TCGA-E2-A1LH	I	Early	TCGA-E2-A15P-01	TCGA-E2-A15P	I	Early	TCGA-E2-A570-01	TCGA-E2-A570	I	Early
TCGA-E2-A1LS-01	TCGA-E2-A1LS	I	Early	TCGA-E2-A1BC-01	TCGA-E2-A1BC	I	Early	TCGA-E2-A573-01	TCGA-E2-A573	I	Early
TCGA-E2-A570-01	TCGA-E2-A570	I	Early	TCGA-E2-A1IF-01	TCGA-E2-A1IF	I	Early	TCGA-E2-A576-01	TCGA-E2-A576	I	Early
TCGA-E2-A573-01	TCGA-E2-A573	I	Early	TCGA-E2-A1IH-01	TCGA-E2-A1IH	I	Early	TCGA-E9-A1R4-01	TCGA-E9-A1R4	I	Early
TCGA-E2-A576-01	TCGA-E2-A576	I	Early	TCGA-E2-A1II-01	TCGA-E2-A1II	I	Early	TCGA-E9-A1R5-01	TCGA-E9-A1R5	I	Early
TCGA-E9-A1R4-01	TCGA-E9-A1R4	I	Early	TCGA-E2-A1IJ-01	TCGA-E2-A1IJ	I	Early	TCGA-E9-A1RA-01	TCGA-E9-A1RA	I	Early
TCGA-E9-A1R5-01	TCGA-E9-A1R5	I	Early	TCGA-E2-A1IN-01	TCGA-E2-A1IN	I	Early	TCGA-E9-A229-01	TCGA-E9-A229	I	Early
TCGA-E9-A1RA-01	TCGA-E9-A1RA	I	Early	TCGA-E2-A1IO-01	TCGA-E2-A1IO	I	Early	TCGA-E9-A22B-01	TCGA-E9-A22B	I	Early
TCGA-E9-A229-01	TCGA-E9-A229	I	Early	TCGA-E2-A1IU-01	TCGA-E2-A1IU	I	Early	TCGA-E9-A247-01	TCGA-E9-A247	I	Early
TCGA-E9-A22B-01	TCGA-E9-A22B	I	Early	TCGA-E2-A1LH-01	TCGA-E2-A1LH	I	Early	TCGA-E9-A54X-01	TCGA-E9-A54X	I	Early
TCGA-E9-A247-01	TCGA-E9-A247	I	Early	TCGA-E2-A1LS-01	TCGA-E2-A1LS	I	Early	TCGA-EW-A1IY-01	TCGA-EW-A1IY	I	Early
TCGA-E9-A54X-01	TCGA-E9-A54X	I	Early	TCGA-E2-A570-01	TCGA-E2-A570	I	Early	TCGA-EW-A1J3-01	TCGA-EW-A1J3	I	Early
TCGA-EW-A1IY-01	TCGA-EW-A1IY	I	Early	TCGA-E2-A573-01	TCGA-E2-A573	I	Early	TCGA-EW-A1J6-01	TCGA-EW-A1J6	I	Early
TCGA-EW-A1J3-01	TCGA-EW-A1J3	I	Early	TCGA-E2-A576-01	TCGA-E2-A576	I	Early	TCGA-EW-A1PF-01	TCGA-EW-A1PF	I	Early
TCGA-EW-A1J6-01	TCGA-EW-A1J6	I	Early	TCGA-E9-A1R4-01	TCGA-E9-A1R4	I	Early	TCGA-GM-A2D9-01	TCGA-GM-A2D9	I	Early
TCGA-EW-A1PF-01	TCGA-EW-A1PF	I	Early	TCGA-E9-A1R5-01	TCGA-E9-A1R5	I	Early	TCGA-GM-A2DD-01	TCGA-GM-A2DD	I	Early
TCGA-GM-A2D9-01	TCGA-GM-A2D9	I	Early	TCGA-E9-A1RA-01	TCGA-E9-A1RA	I	Early	TCGA-GM-A2DH-01	TCGA-GM-A2DH	I	Early
TCGA-GM-A2DD-01	TCGA-GM-A2DD	I	Early	TCGA-E9-A229-01	TCGA-E9-A229	I	Early	TCGA-GM-A2DI-01	TCGA-GM-A2DI	I	Early
TCGA-GM-A2DH-01	TCGA-GM-A2DH	I	Early	TCGA-E9-A22B-01	TCGA-E9-A22B	I	Early	TCGA-GM-A2DK-01	TCGA-GM-A2DK	I	Early
TCGA-GM-A2DI-01	TCGA-GM-A2DI	I	Early	TCGA-E9-A247-01	TCGA-E9-A247	I	Early	TCGA-GM-A2DL-01	TCGA-GM-A2DL	I	Early
TCGA-GM-A2DK-01	TCGA-GM-A2DK	I	Early	TCGA-E9-A54X-01	TCGA-E9-A54X	I	Early	TCGA-GM-A2DO-01	TCGA-GM-A2DO	I	Early
TCGA-GM-A2DL-01	TCGA-GM-A2DL	I	Early	TCGA-EW-A1IY-01	TCGA-EW-A1IY	I	Early	TCGA-LD-A9QF-01	TCGA-LD-A9QF	I	Early
TCGA-GM-A2DO-01	TCGA-GM-A2DO	I	Early	TCGA-EW-A1J3-01	TCGA-EW-A1J3	I	Early	TCGA-LL-A440-01	TCGA-LL-A440	I	Early
TCGA-LD-A9QF-01	TCGA-LD-A9QF	I	Early	TCGA-EW-A1J6-01	TCGA-EW-A1J6	I	Early	TCGA-LL-A441-01	TCGA-LL-A441	I	Early
TCGA-LL-A440-01	TCGA-LL-A440	I	Early	TCGA-EW-A1PF-01	TCGA-EW-A1PF	I	Early	TCGA-LL-A5YO-01	TCGA-LL-A5YO	I	Early
TCGA-LL-A441-01	TCGA-LL-A441	I	Early	TCGA-GM-A2D9-01	TCGA-GM-A2D9	I	Early	TCGA-LL-A73Y-01	TCGA-LL-A73Y	I	Early
TCGA-LL-A5YO-01	TCGA-LL-A5YO	I	Early	TCGA-GM-A2DD-01	TCGA-GM-A2DD	I	Early	TCGA-LL-A740-01	TCGA-LL-A740	I	Early
TCGA-LL-A73Y-01	TCGA-LL-A73Y	I	Early	TCGA-GM-A2DH-01	TCGA-GM-A2DH	I	Early	TCGA-OL-A5RX-01	TCGA-OL-A5RX	I	Early
TCGA-LL-A740-01	TCGA-LL-A740	I	Early	TCGA-GM-A2DI-01	TCGA-GM-A2DI	I	Early	TCGA-OL-A5RZ-01	TCGA-OL-A5RZ	I	Early
TCGA-OL-A5RX-01	TCGA-OL-A5RX	I	Early	TCGA-GM-A2DK-01	TCGA-GM-A2DK	I	Early	TCGA-OL-A66H-01	TCGA-OL-A66H	I	Early
TCGA-OL-A5RZ-01	TCGA-OL-A5RZ	I	Early	TCGA-GM-A2DL-01	TCGA-GM-A2DL	I	Early	TCGA-OL-A66J-01	TCGA-OL-A66J	I	Early
TCGA-OL-A66H-01	TCGA-OL-A66H	I	Early	TCGA-GM-A2DO-01	TCGA-GM-A2DO	I	Early	TCGA-OL-A66L-01	TCGA-OL-A66L	I	Early
TCGA-OL-A66J-01	TCGA-OL-A66J	I	Early	TCGA-LD-A9QF-01	TCGA-LD-A9QF	I	Early	TCGA-OL-A6VO-01	TCGA-OL-A6VO	I	Early
TCGA-OL-A66L-01	TCGA-OL-A66L	I	Early	TCGA-LL-A440-01	TCGA-LL-A440	I	Early	TCGA-OL-A6VR-01	TCGA-OL-A6VR	I	Early
TCGA-OL-A6VO-01	TCGA-OL-A6VO	I	Early	TCGA-LL-A441-01	TCGA-LL-A441	I	Early	TCGA-S3-AA14-01	TCGA-S3-AA14	I	Early
TCGA-OL-A6VR-01	TCGA-OL-A6VR	I	Early	TCGA-LL-A5YO-01	TCGA-LL-A5YO	I	Early	TCGA-WT-AB44-01	TCGA-WT-AB44	I	Early
TCGA-S3-AA14-01	TCGA-S3-AA14	I	Early	TCGA-LL-A73Y-01	TCGA-LL-A73Y	I	Early	TCGA-Z7-A8R6-01	TCGA-Z7-A8R6	I	Early
TCGA-WT-AB44-01	TCGA-WT-AB44	I	Early	TCGA-LL-A740-01	TCGA-LL-A740	I	Early	TCGA-3C-AALI-01	TCGA-3C-AALI	II	Early
TCGA-Z7-A8R6-01	TCGA-Z7-A8R6	I	Early	TCGA-OL-A5RX-01	TCGA-OL-A5RX	I	Early	TCGA-3C-AALJ-01	TCGA-3C-AALJ	II	Early
TCGA-3C-AALI-01	TCGA-3C-AALI	II	Early	TCGA-OL-A5RZ-01	TCGA-OL-A5RZ	I	Early	TCGA-5L-AAT0-01	TCGA-5L-AAT0	II	Early
TCGA-3C-AALJ-01	TCGA-3C-AALJ	II	Early	TCGA-OL-A66H-01	TCGA-OL-A66H	I	Early	TCGA-5T-A9QA-01	TCGA-5T-A9QA	II	Early
TCGA-5L-AAT0-01	TCGA-5L-AAT0	II	Early	TCGA-OL-A66J-01	TCGA-OL-A66J	I	Early	TCGA-A1-A0SD-01	TCGA-A1-A0SD	II	Early
TCGA-5T-A9QA-01	TCGA-5T-A9QA	II	Early	TCGA-OL-A66L-01	TCGA-OL-A66L	I	Early	TCGA-A1-A0SF-01	TCGA-A1-A0SF	II	Early
TCGA-A1-A0SD-01	TCGA-A1-A0SD	II	Early	TCGA-OL-A6VO-01	TCGA-OL-A6VO	I	Early	TCGA-A1-A0SG-01	TCGA-A1-A0SG	II	Early
TCGA-A1-A0SF-01	TCGA-A1-A0SF	II	Early	TCGA-OL-A6VR-01	TCGA-OL-A6VR	I	Early	TCGA-A1-A0SH-01	TCGA-A1-A0SH	II	Early
TCGA-A1-A0SG-01	TCGA-A1-A0SG	II	Early	TCGA-S3-AA14-01	TCGA-S3-AA14	I	Early	TCGA-A1-A0SI-01	TCGA-A1-A0SI	II	Early
TCGA-A1-A0SH-01	TCGA-A1-A0SH	II	Early	TCGA-WT-AB44-01	TCGA-WT-AB44	I	Early	TCGA-A1-A0SK-01	TCGA-A1-A0SK	II	Early
TCGA-A1-A0SI-01	TCGA-A1-A0SI	II	Early	TCGA-Z7-A8R6-01	TCGA-Z7-A8R6	I	Early	TCGA-A1-A0SM-01	TCGA-A1-A0SM	II	Early
TCGA-A1-A0SK-01	TCGA-A1-A0SK	II	Early	TCGA-3C-AALI-01	TCGA-3C-AALI	II	Early	TCGA-A1-A0SN-01	TCGA-A1-A0SN	II	Early
TCGA-A1-A0SM-01	TCGA-A1-A0SM	II	Early	TCGA-3C-AALJ-01	TCGA-3C-AALJ	II	Early	TCGA-A1-A0SO-01	TCGA-A1-A0SO	II	Early
TCGA-A1-A0SN-01	TCGA-A1-A0SN	II	Early	TCGA-5L-AAT0-01	TCGA-5L-AAT0	II	Early	TCGA-A1-A0SP-01	TCGA-A1-A0SP	II	Early
TCGA-A1-A0SO-01	TCGA-A1-A0SO	II	Early	TCGA-5T-A9QA-01	TCGA-5T-A9QA	II	Early	TCGA-A1-A0SQ-01	TCGA-A1-A0SQ	II	Early
TCGA-A1-A0SP-01	TCGA-A1-A0SP	II	Early	TCGA-A1-A0SD-01	TCGA-A1-A0SD	II	Early	TCGA-A2-A04T-01	TCGA-A2-A04T	II	Early
TCGA-A1-A0SQ-01	TCGA-A1-A0SQ	II	Early	TCGA-A1-A0SF-01	TCGA-A1-A0SF	II	Early	TCGA-A2-A04U-01	TCGA-A2-A04U	II	Early
TCGA-A2-A04T-01	TCGA-A2-A04T	II	Early	TCGA-A1-A0SG-01	TCGA-A1-A0SG	II	Early	TCGA-A2-A04V-01	TCGA-A2-A04V	II	Early
TCGA-A2-A04U-01	TCGA-A2-A04U	II	Early	TCGA-A1-A0SH-01	TCGA-A1-A0SH	II	Early	TCGA-A2-A04W-01	TCGA-A2-A04W	II	Early
TCGA-A2-A04V-01	TCGA-A2-A04V	II	Early	TCGA-A1-A0SI-01	TCGA-A1-A0SI	II	Early	TCGA-A2-A04X-01	TCGA-A2-A04X	II	Early
TCGA-A2-A04W-01	TCGA-A2-A04W	II	Early	TCGA-A1-A0SK-01	TCGA-A1-A0SK	II	Early	TCGA-A2-A04Y-01	TCGA-A2-A04Y	II	Early
TCGA-A2-A04X-01	TCGA-A2-A04X	II	Early	TCGA-A1-A0SM-01	TCGA-A1-A0SM	II	Early	TCGA-A2-A0CM-01	TCGA-A2-A0CM	II	Early
TCGA-A2-A04Y-01	TCGA-A2-A04Y	II	Early	TCGA-A1-A0SN-01	TCGA-A1-A0SN	II	Early	TCGA-A2-A0CO-01	TCGA-A2-A0CO	II	Early
TCGA-A2-A0CM-01	TCGA-A2-A0CM	II	Early	TCGA-A1-A0SO-01	TCGA-A1-A0SO	II	Early	TCGA-A2-A0CR-01	TCGA-A2-A0CR	II	Early
TCGA-A2-A0CO-01	TCGA-A2-A0CO	II	Early	TCGA-A1-A0SP-01	TCGA-A1-A0SP	II	Early	TCGA-A2-A0CT-01	TCGA-A2-A0CT	II	Early
TCGA-A2-A0CR-01	TCGA-A2-A0CR	II	Early	TCGA-A1-A0SQ-01	TCGA-A1-A0SQ	II	Early	TCGA-A2-A0CU-01	TCGA-A2-A0CU	II	Early
TCGA-A2-A0CT-01	TCGA-A2-A0CT	II	Early	TCGA-A2-A04T-01	TCGA-A2-A04T	II	Early	TCGA-A2-A0CV-01	TCGA-A2-A0CV	II	Early
TCGA-A2-A0CU-01	TCGA-A2-A0CU	II	Early	TCGA-A2-A04U-01	TCGA-A2-A04U	II	Early	TCGA-A2-A0CW-01	TCGA-A2-A0CW	II	Early
TCGA-A2-A0CV-01	TCGA-A2-A0CV	II	Early	TCGA-A2-A04V-01	TCGA-A2-A04V	II	Early	TCGA-A2-A0CY-01	TCGA-A2-A0CY	II	Early
TCGA-A2-A0CW-01	TCGA-A2-A0CW	II	Early	TCGA-A2-A04W-01	TCGA-A2-A04W	II	Early	TCGA-A2-A0CZ-01	TCGA-A2-A0CZ	II	Early
TCGA-A2-A0CY-01	TCGA-A2-A0CY	II	Early	TCGA-A2-A04X-01	TCGA-A2-A04X	II	Early	TCGA-A2-A0D0-01	TCGA-A2-A0D0	II	Early
TCGA-A2-A0CZ-01	TCGA-A2-A0CZ	II	Early	TCGA-A2-A04Y-01	TCGA-A2-A04Y	II	Early	TCGA-A2-A0D1-01	TCGA-A2-A0D1	II	Early
TCGA-A2-A0D0-01	TCGA-A2-A0D0	II	Early	TCGA-A2-A0CM-01	TCGA-A2-A0CM	II	Early	TCGA-A2-A0D2-01	TCGA-A2-A0D2	II	Early
TCGA-A2-A0D1-01	TCGA-A2-A0D1	II	Early	TCGA-A2-A0CO-01	TCGA-A2-A0CO	II	Early	TCGA-A2-A0D4-01	TCGA-A2-A0D4	II	Early
TCGA-A2-A0D2-01	TCGA-A2-A0D2	II	Early	TCGA-A2-A0CR-01	TCGA-A2-A0CR	II	Early	TCGA-A2-A0EN-01	TCGA-A2-A0EN	II	Early
TCGA-A2-A0D4-01	TCGA-A2-A0D4	II	Early	TCGA-A2-A0CT-01	TCGA-A2-A0CT	II	Early	TCGA-A2-A0EQ-01	TCGA-A2-A0EQ	II	Early
TCGA-A2-A0EN-01	TCGA-A2-A0EN	II	Early	TCGA-A2-A0CU-01	TCGA-A2-A0CU	II	Early	TCGA-A2-A0ES-01	TCGA-A2-A0ES	II	Early
TCGA-A2-A0EQ-01	TCGA-A2-A0EQ	II	Early	TCGA-A2-A0CV-01	TCGA-A2-A0CV	II	Early	TCGA-A2-A0EX-01	TCGA-A2-A0EX	II	Early
TCGA-A2-A0ES-01	TCGA-A2-A0ES	II	Early	TCGA-A2-A0CW-01	TCGA-A2-A0CW	II	Early	TCGA-A2-A0EY-01	TCGA-A2-A0EY	II	Early
TCGA-A2-A0EX-01	TCGA-A2-A0EX	II	Early	TCGA-A2-A0CX-01	TCGA-A2-A0CX	II	Early	TCGA-A2-A0ST-01	TCGA-A2-A0ST	II	Early
TCGA-A2-A0EY-01	TCGA-A2-A0EY	II	Early	TCGA-A2-A0CY-01	TCGA-A2-A0CY	II	Early	TCGA-A2-A0SU-01	TCGA-A2-A0SU	II	Early
TCGA-A2-A0ST-01	TCGA-A2-A0ST	II	Early	TCGA-A2-A0CZ-01	TCGA-A2-A0CZ	II	Early	TCGA-A2-A0T0-01	TCGA-A2-A0T0	II	Early
TCGA-A2-A0SU-01	TCGA-A2-A0SU	II	Early	TCGA-A2-A0D0-01	TCGA-A2-A0D0	II	Early	TCGA-A2-A0T4-01	TCGA-A2-A0T4	II	Early
TCGA-A2-A0T0-01	TCGA-A2-A0T0	II	Early	TCGA-A2-A0D1-01	TCGA-A2-A0D1	II	Early	TCGA-A2-A0T5-01	TCGA-A2-A0T5	II	Early
TCGA-A2-A0T4-01	TCGA-A2-A0T4	II	Early	TCGA-A2-A0D2-01	TCGA-A2-A0D2	II	Early	TCGA-A2-A0T6-01	TCGA-A2-A0T6	II	Early
TCGA-A2-A0T5-01	TCGA-A2-A0T5	II	Early	TCGA-A2-A0D4-01	TCGA-A2-A0D4	II	Early	TCGA-A2-A0T7-01	TCGA-A2-A0T7	II	Early
TCGA-A2-A0T6-01	TCGA-A2-A0T6	II	Early	TCGA-A2-A0EN-01	TCGA-A2-A0EN	II	Early	TCGA-A2-A0YC-01	TCGA-A2-A0YC	II	Early
TCGA-A2-A0T7-01	TCGA-A2-A0T7	II	Early	TCGA-A2-A0EQ-01	TCGA-A2-A0EQ	II	Early	TCGA-A2-A0YD-01	TCGA-A2-A0YD	II	Early
TCGA-A2-A0YC-01	TCGA-A2-A0YC	II	Early	TCGA-A2-A0ES-01	TCGA-A2-A0ES	II	Early	TCGA-A2-A0YK-01	TCGA-A2-A0YK	II	Early
TCGA-A2-A0YD-01	TCGA-A2-A0YD	II	Early	TCGA-A2-A0EX-01	TCGA-A2-A0EX	II	Early	TCGA-A2-A0YM-01	TCGA-A2-A0YM	II	Early
TCGA-A2-A0YK-01	TCGA-A2-A0YK	II	Early	TCGA-A2-A0EY-01	TCGA-A2-A0EY	II	Early	TCGA-A2-A1FV-01	TCGA-A2-A1FV	II	Early
TCGA-A2-A0YM-01	TCGA-A2-A0YM	II	Early	TCGA-A2-A0ST-01	TCGA-A2-A0ST	II	Early	TCGA-A2-A1FZ-01	TCGA-A2-A1FZ	II	Early
TCGA-A2-A1FV-01	TCGA-A2-A1FV	II	Early	TCGA-A2-A0SU-01	TCGA-A2-A0SU	II	Early	TCGA-A2-A1G0-01	TCGA-A2-A1G0	II	Early
TCGA-A2-A1FZ-01	TCGA-A2-A1FZ	II	Early	TCGA-A2-A0T0-01	TCGA-A2-A0T0	II	Early	TCGA-A2-A1G1-01	TCGA-A2-A1G1	II	Early
TCGA-A2-A1G0-01	TCGA-A2-A1G0	II	Early	TCGA-A2-A0T4-01	TCGA-A2-A0T4	II	Early	TCGA-A2-A25A-01	TCGA-A2-A25A	II	Early
TCGA-A2-A1G1-01	TCGA-A2-A1G1	II	Early	TCGA-A2-A0T5-01	TCGA-A2-A0T5	II	Early	TCGA-A2-A25B-01	TCGA-A2-A25B	II	Early
TCGA-A2-A25A-01	TCGA-A2-A25A	II	Early	TCGA-A2-A0T6-01	TCGA-A2-A0T6	II	Early	TCGA-A2-A25C-01	TCGA-A2-A25C	II	Early
TCGA-A2-A25B-01	TCGA-A2-A25B	II	Early	TCGA-A2-A0T7-01	TCGA-A2-A0T7	II	Early	TCGA-A2-A25F-01	TCGA-A2-A25F	II	Early
TCGA-A2-A25C-01	TCGA-A2-A25C	II	Early	TCGA-A2-A0YC-01	TCGA-A2-A0YC	II	Early	TCGA-A2-A3KC-01	TCGA-A2-A3KC	II	Early
TCGA-A2-A25F-01	TCGA-A2-A25F	II	Early	TCGA-A2-A0YD-01	TCGA-A2-A0YD	II	Early	TCGA-A2-A3XT-01	TCGA-A2-A3XT	II	Early
TCGA-A2-A3KC-01	TCGA-A2-A3KC	II	Early	TCGA-A2-A0YE-01	TCGA-A2-A0YE	II	Early	TCGA-A2-A3XU-01	TCGA-A2-A3XU	II	Early
TCGA-A2-A3XT-01	TCGA-A2-A3XT	II	Early	TCGA-A2-A0YK-01	TCGA-A2-A0YK	II	Early	TCGA-A2-A3XV-01	TCGA-A2-A3XV	II	Early
TCGA-A2-A3XU-01	TCGA-A2-A3XU	II	Early	TCGA-A2-A0YM-01	TCGA-A2-A0YM	II	Early	TCGA-A2-A3XW-01	TCGA-A2-A3XW	II	Early
TCGA-A2-A3XV-01	TCGA-A2-A3XV	II	Early	TCGA-A2-A1FV-01	TCGA-A2-A1FV	II	Early	TCGA-A2-A3XX-01	TCGA-A2-A3XX	II	Early
TCGA-A2-A3XW-01	TCGA-A2-A3XW	II	Early	TCGA-A2-A1FZ-01	TCGA-A2-A1FZ	II	Early	TCGA-A2-A3XY-01	TCGA-A2-A3XY	II	Early
TCGA-A2-A3XX-01	TCGA-A2-A3XX	II	Early	TCGA-A2-A1G0-01	TCGA-A2-A1G0	II	Early	TCGA-A2-A3Y0-01	TCGA-A2-A3Y0	II	Early
TCGA-A2-A3XY-01	TCGA-A2-A3XY	II	Early	TCGA-A2-A1G1-01	TCGA-A2-A1G1	II	Early	TCGA-A2-A4RX-01	TCGA-A2-A4RX	II	Early
TCGA-A2-A3Y0-01	TCGA-A2-A3Y0	II	Early	TCGA-A2-A25A-01	TCGA-A2-A25A	II	Early	TCGA-A2-A4S0-01	TCGA-A2-A4S0	II	Early
TCGA-A2-A4RX-01	TCGA-A2-A4RX	II	Early	TCGA-A2-A25B-01	TCGA-A2-A25B	II	Early	TCGA-A2-A4S1-01	TCGA-A2-A4S1	II	Early
TCGA-A2-A4S0-01	TCGA-A2-A4S0	II	Early	TCGA-A2-A25C-01	TCGA-A2-A25C	II	Early	TCGA-A2-A4S3-01	TCGA-A2-A4S3	II	Early
TCGA-A2-A4S1-01	TCGA-A2-A4S1	II	Early	TCGA-A2-A25F-01	TCGA-A2-A25F	II	Early	TCGA-A7-A0CE-01	TCGA-A7-A0CE	II	Early
TCGA-A2-A4S3-01	TCGA-A2-A4S3	II	Early	TCGA-A2-A3KC-01	TCGA-A2-A3KC	II	Early	TCGA-A7-A0CG-01	TCGA-A7-A0CG	II	Early
TCGA-A7-A0CE-01	TCGA-A7-A0CE	II	Early	TCGA-A2-A3XT-01	TCGA-A2-A3XT	II	Early	TCGA-A7-A0CH-01	TCGA-A7-A0CH	II	Early
TCGA-A7-A0CG-01	TCGA-A7-A0CG	II	Early	TCGA-A2-A3XU-01	TCGA-A2-A3XU	II	Early	TCGA-A7-A0CJ-01	TCGA-A7-A0CJ	II	Early
TCGA-A7-A0CH-01	TCGA-A7-A0CH	II	Early	TCGA-A2-A3XV-01	TCGA-A2-A3XV	II	Early	TCGA-A7-A0D9-01	TCGA-A7-A0D9	II	Early
TCGA-A7-A0CJ-01	TCGA-A7-A0CJ	II	Early	TCGA-A2-A3XW-01	TCGA-A2-A3XW	II	Early	TCGA-A7-A0DA-01	TCGA-A7-A0DA	II	Early
TCGA-A7-A0D9-01	TCGA-A7-A0D9	II	Early	TCGA-A2-A3XX-01	TCGA-A2-A3XX	II	Early	TCGA-A7-A0DB-01	TCGA-A7-A0DB	II	Early
TCGA-A7-A0DA-01	TCGA-A7-A0DA	II	Early	TCGA-A2-A3XY-01	TCGA-A2-A3XY	II	Early	TCGA-A7-A13D-01	TCGA-A7-A13D	II	Early
TCGA-A7-A0DB-01	TCGA-A7-A0DB	II	Early	TCGA-A2-A3Y0-01	TCGA-A2-A3Y0	II	Early	TCGA-A7-A13E-01	TCGA-A7-A13E	II	Early
TCGA-A7-A13D-01	TCGA-A7-A13D	II	Early	TCGA-A2-A4RX-01	TCGA-A2-A4RX	II	Early	TCGA-A7-A13G-01	TCGA-A7-A13G	II	Early
TCGA-A7-A13E-01	TCGA-A7-A13E	II	Early	TCGA-A2-A4S0-01	TCGA-A2-A4S0	II	Early	TCGA-A7-A13H-01	TCGA-A7-A13H	II	Early
TCGA-A7-A13G-01	TCGA-A7-A13G	II	Early	TCGA-A2-A4S1-01	TCGA-A2-A4S1	II	Early	TCGA-A7-A26G-01	TCGA-A7-A26G	II	Early
TCGA-A7-A13H-01	TCGA-A7-A13H	II	Early	TCGA-A2-A4S3-01	TCGA-A2-A4S3	II	Early	TCGA-A7-A26H-01	TCGA-A7-A26H	II	Early
TCGA-A7-A26G-01	TCGA-A7-A26G	II	Early	TCGA-A7-A0CE-01	TCGA-A7-A0CE	II	Early	TCGA-A7-A26I-01	TCGA-A7-A26I	II	Early
TCGA-A7-A26H-01	TCGA-A7-A26H	II	Early	TCGA-A7-A0CG-01	TCGA-A7-A0CG	II	Early	TCGA-A7-A26J-01	TCGA-A7-A26J	II	Early
TCGA-A7-A26I-01	TCGA-A7-A26I	II	Early	TCGA-A7-A0CH-01	TCGA-A7-A0CH	II	Early	TCGA-A7-A3IZ-01	TCGA-A7-A3IZ	II	Early
TCGA-A7-A26J-01	TCGA-A7-A26J	II	Early	TCGA-A7-A0CJ-01	TCGA-A7-A0CJ	II	Early	TCGA-A7-A3J0-01	TCGA-A7-A3J0	II	Early
TCGA-A7-A3IZ-01	TCGA-A7-A3IZ	II	Early	TCGA-A7-A0D9-01	TCGA-A7-A0D9	II	Early	TCGA-A7-A3RF-01	TCGA-A7-A3RF	II	Early
TCGA-A7-A3J0-01	TCGA-A7-A3J0	II	Early	TCGA-A7-A0DA-01	TCGA-A7-A0DA	II	Early	TCGA-A7-A4SA-01	TCGA-A7-A4SA	II	Early
TCGA-A7-A3RF-01	TCGA-A7-A3RF	II	Early	TCGA-A7-A0DB-01	TCGA-A7-A0DB	II	Early	TCGA-A7-A4SC-01	TCGA-A7-A4SC	II	Early
TCGA-A7-A4SA-01	TCGA-A7-A4SA	II	Early	TCGA-A7-A13D-01	TCGA-A7-A13D	II	Early	TCGA-A7-A4SD-01	TCGA-A7-A4SD	II	Early
TCGA-A7-A4SC-01	TCGA-A7-A4SC	II	Early	TCGA-A7-A13E-01	TCGA-A7-A13E	II	Early	TCGA-A7-A4SE-01	TCGA-A7-A4SE	II	Early
TCGA-A7-A4SD-01	TCGA-A7-A4SD	II	Early	TCGA-A7-A13G-01	TCGA-A7-A13G	II	Early	TCGA-A7-A4SF-01	TCGA-A7-A4SF	II	Early
TCGA-A7-A4SE-01	TCGA-A7-A4SE	II	Early	TCGA-A7-A13H-01	TCGA-A7-A13H	II	Early	TCGA-A7-A56D-01	TCGA-A7-A56D	II	Early
TCGA-A7-A4SF-01	TCGA-A7-A4SF	II	Early	TCGA-A7-A26G-01	TCGA-A7-A26G	II	Early	TCGA-A7-A5ZV-01	TCGA-A7-A5ZV	II	Early
TCGA-A7-A56D-01	TCGA-A7-A56D	II	Early	TCGA-A7-A26H-01	TCGA-A7-A26H	II	Early	TCGA-A7-A5ZW-01	TCGA-A7-A5ZW	II	Early
TCGA-A7-A5ZV-01	TCGA-A7-A5ZV	II	Early	TCGA-A7-A26I-01	TCGA-A7-A26I	II	Early	TCGA-A7-A6VV-01	TCGA-A7-A6VV	II	Early
TCGA-A7-A5ZW-01	TCGA-A7-A5ZW	II	Early	TCGA-A7-A26J-01	TCGA-A7-A26J	II	Early	TCGA-A7-A6VW-01	TCGA-A7-A6VW	II	Early
TCGA-A7-A6VV-01	TCGA-A7-A6VV	II	Early	TCGA-A7-A3IZ-01	TCGA-A7-A3IZ	II	Early	TCGA-A7-A6VX-01	TCGA-A7-A6VX	II	Early
TCGA-A7-A6VW-01	TCGA-A7-A6VW	II	Early	TCGA-A7-A3J0-01	TCGA-A7-A3J0	II	Early	TCGA-A7-A6VY-01	TCGA-A7-A6VY	II	Early
TCGA-A7-A6VX-01	TCGA-A7-A6VX	II	Early	TCGA-A7-A3RF-01	TCGA-A7-A3RF	II	Early	TCGA-A8-A06R-01	TCGA-A8-A06R	II	Early
TCGA-A7-A6VY-01	TCGA-A7-A6VY	II	Early	TCGA-A7-A4SA-01	TCGA-A7-A4SA	II	Early	TCGA-A8-A06U-01	TCGA-A8-A06U	II	Early
TCGA-A8-A06R-01	TCGA-A8-A06R	II	Early	TCGA-A7-A4SC-01	TCGA-A7-A4SC	II	Early	TCGA-A8-A06Y-01	TCGA-A8-A06Y	II	Early
TCGA-A8-A06U-01	TCGA-A8-A06U	II	Early	TCGA-A7-A4SD-01	TCGA-A7-A4SD	II	Early	TCGA-A8-A06Z-01	TCGA-A8-A06Z	II	Early
TCGA-A8-A06Y-01	TCGA-A8-A06Y	II	Early	TCGA-A7-A4SE-01	TCGA-A7-A4SE	II	Early	TCGA-A8-A075-01	TCGA-A8-A075	II	Early
TCGA-A8-A06Z-01	TCGA-A8-A06Z	II	Early	TCGA-A7-A4SF-01	TCGA-A7-A4SF	II	Early	TCGA-A8-A076-01	TCGA-A8-A076	II	Early
TCGA-A8-A075-01	TCGA-A8-A075	II	Early	TCGA-A7-A56D-01	TCGA-A7-A56D	II	Early	TCGA-A8-A07B-01	TCGA-A8-A07B	II	Early
TCGA-A8-A076-01	TCGA-A8-A076	II	Early	TCGA-A7-A5ZV-01	TCGA-A7-A5ZV	II	Early	TCGA-A8-A07C-01	TCGA-A8-A07C	II	Early
TCGA-A8-A07B-01	TCGA-A8-A07B	II	Early	TCGA-A7-A5ZW-01	TCGA-A7-A5ZW	II	Early	TCGA-A8-A07F-01	TCGA-A8-A07F	II	Early
TCGA-A8-A07C-01	TCGA-A8-A07C	II	Early	TCGA-A7-A6VV-01	TCGA-A7-A6VV	II	Early	TCGA-A8-A07G-01	TCGA-A8-A07G	II	Early
TCGA-A8-A07F-01	TCGA-A8-A07F	II	Early	TCGA-A7-A6VW-01	TCGA-A7-A6VW	II	Early	TCGA-A8-A07J-01	TCGA-A8-A07J	II	Early
TCGA-A8-A07G-01	TCGA-A8-A07G	II	Early	TCGA-A7-A6VX-01	TCGA-A7-A6VX	II	Early	TCGA-A8-A07O-01	TCGA-A8-A07O	II	Early
TCGA-A8-A07J-01	TCGA-A8-A07J	II	Early	TCGA-A7-A6VY-01	TCGA-A7-A6VY	II	Early	TCGA-A8-A07P-01	TCGA-A8-A07P	II	Early
TCGA-A8-A07O-01	TCGA-A8-A07O	II	Early	TCGA-A8-A06R-01	TCGA-A8-A06R	II	Early	TCGA-A8-A07S-01	TCGA-A8-A07S	II	Early
TCGA-A8-A07P-01	TCGA-A8-A07P	II	Early	TCGA-A8-A06U-01	TCGA-A8-A06U	II	Early	TCGA-A8-A07Z-01	TCGA-A8-A07Z	II	Early
TCGA-A8-A07S-01	TCGA-A8-A07S	II	Early	TCGA-A8-A06X-01	TCGA-A8-A06X	II	Early	TCGA-A8-A081-01	TCGA-A8-A081	II	Early
TCGA-A8-A07Z-01	TCGA-A8-A07Z	II	Early	TCGA-A8-A06Y-01	TCGA-A8-A06Y	II	Early	TCGA-A8-A082-01	TCGA-A8-A082	II	Early
TCGA-A8-A081-01	TCGA-A8-A081	II	Early	TCGA-A8-A06Z-01	TCGA-A8-A06Z	II	Early	TCGA-A8-A083-01	TCGA-A8-A083	II	Early
TCGA-A8-A082-01	TCGA-A8-A082	II	Early	TCGA-A8-A075-01	TCGA-A8-A075	II	Early	TCGA-A8-A084-01	TCGA-A8-A084	II	Early
TCGA-A8-A083-01	TCGA-A8-A083	II	Early	TCGA-A8-A076-01	TCGA-A8-A076	II	Early	TCGA-A8-A085-01	TCGA-A8-A085	II	Early
TCGA-A8-A084-01	TCGA-A8-A084	II	Early	TCGA-A8-A07B-01	TCGA-A8-A07B	II	Early	TCGA-A8-A086-01	TCGA-A8-A086	II	Early
TCGA-A8-A085-01	TCGA-A8-A085	II	Early	TCGA-A8-A07C-01	TCGA-A8-A07C	II	Early	TCGA-A8-A08B-01	TCGA-A8-A08B	II	Early
TCGA-A8-A086-01	TCGA-A8-A086	II	Early	TCGA-A8-A07F-01	TCGA-A8-A07F	II	Early	TCGA-A8-A08G-01	TCGA-A8-A08G	II	Early
TCGA-A8-A08B-01	TCGA-A8-A08B	II	Early	TCGA-A8-A07G-01	TCGA-A8-A07G	II	Early	TCGA-A8-A08H-01	TCGA-A8-A08H	II	Early
TCGA-A8-A08G-01	TCGA-A8-A08G	II	Early	TCGA-A8-A07J-01	TCGA-A8-A07J	II	Early	TCGA-A8-A08I-01	TCGA-A8-A08I	II	Early
TCGA-A8-A08H-01	TCGA-A8-A08H	II	Early	TCGA-A8-A07O-01	TCGA-A8-A07O	II	Early	TCGA-A8-A08R-01	TCGA-A8-A08R	II	Early
TCGA-A8-A08I-01	TCGA-A8-A08I	II	Early	TCGA-A8-A07P-01	TCGA-A8-A07P	II	Early	TCGA-A8-A08S-01	TCGA-A8-A08S	II	Early
TCGA-A8-A08R-01	TCGA-A8-A08R	II	Early	TCGA-A8-A07S-01	TCGA-A8-A07S	II	Early	TCGA-A8-A090-01	TCGA-A8-A090	II	Early
TCGA-A8-A08S-01	TCGA-A8-A08S	II	Early	TCGA-A8-A07Z-01	TCGA-A8-A07Z	II	Early	TCGA-A8-A091-01	TCGA-A8-A091	II	Early
TCGA-A8-A090-01	TCGA-A8-A090	II	Early	TCGA-A8-A081-01	TCGA-A8-A081	II	Early	TCGA-A8-A093-01	TCGA-A8-A093	II	Early
TCGA-A8-A091-01	TCGA-A8-A091	II	Early	TCGA-A8-A082-01	TCGA-A8-A082	II	Early	TCGA-A8-A094-01	TCGA-A8-A094	II	Early
TCGA-A8-A093-01	TCGA-A8-A093	II	Early	TCGA-A8-A083-01	TCGA-A8-A083	II	Early	TCGA-A8-A096-01	TCGA-A8-A096	II	Early
TCGA-A8-A094-01	TCGA-A8-A094	II	Early	TCGA-A8-A084-01	TCGA-A8-A084	II	Early	TCGA-A8-A097-01	TCGA-A8-A097	II	Early
TCGA-A8-A096-01	TCGA-A8-A096	II	Early	TCGA-A8-A085-01	TCGA-A8-A085	II	Early	TCGA-A8-A09D-01	TCGA-A8-A09D	II	Early
TCGA-A8-A097-01	TCGA-A8-A097	II	Early	TCGA-A8-A086-01	TCGA-A8-A086	II	Early	TCGA-A8-A09I-01	TCGA-A8-A09I	II	Early
TCGA-A8-A09D-01	TCGA-A8-A09D	II	Early	TCGA-A8-A08B-01	TCGA-A8-A08B	II	Early	TCGA-A8-A09K-01	TCGA-A8-A09K	II	Early
TCGA-A8-A09I-01	TCGA-A8-A09I	II	Early	TCGA-A8-A08C-01	TCGA-A8-A08C	II	Early	TCGA-A8-A09R-01	TCGA-A8-A09R	II	Early
TCGA-A8-A09K-01	TCGA-A8-A09K	II	Early	TCGA-A8-A08G-01	TCGA-A8-A08G	II	Early	TCGA-A8-A09Z-01	TCGA-A8-A09Z	II	Early
TCGA-A8-A09R-01	TCGA-A8-A09R	II	Early	TCGA-A8-A08H-01	TCGA-A8-A08H	II	Early	TCGA-A8-A0A1-01	TCGA-A8-A0A1	II	Early
TCGA-A8-A09Z-01	TCGA-A8-A09Z	II	Early	TCGA-A8-A08I-01	TCGA-A8-A08I	II	Early	TCGA-A8-A0A2-01	TCGA-A8-A0A2	II	Early
TCGA-A8-A0A1-01	TCGA-A8-A0A1	II	Early	TCGA-A8-A08R-01	TCGA-A8-A08R	II	Early	TCGA-A8-A0A4-01	TCGA-A8-A0A4	II	Early
TCGA-A8-A0A2-01	TCGA-A8-A0A2	II	Early	TCGA-A8-A08S-01	TCGA-A8-A08S	II	Early	TCGA-A8-A0A7-01	TCGA-A8-A0A7	II	Early
TCGA-A8-A0A4-01	TCGA-A8-A0A4	II	Early	TCGA-A8-A090-01	TCGA-A8-A090	II	Early	TCGA-A8-A0A9-01	TCGA-A8-A0A9	II	Early
TCGA-A8-A0A7-01	TCGA-A8-A0A7	II	Early	TCGA-A8-A091-01	TCGA-A8-A091	II	Early	TCGA-A8-A0AB-01	TCGA-A8-A0AB	II	Early
TCGA-A8-A0A9-01	TCGA-A8-A0A9	II	Early	TCGA-A8-A093-01	TCGA-A8-A093	II	Early	TCGA-AC-A23C-01	TCGA-AC-A23C	II	Early
TCGA-A8-A0AB-01	TCGA-A8-A0AB	II	Early	TCGA-A8-A094-01	TCGA-A8-A094	II	Early	TCGA-AC-A23E-01	TCGA-AC-A23E	II	Early
TCGA-AC-A23C-01	TCGA-AC-A23C	II	Early	TCGA-A8-A096-01	TCGA-A8-A096	II	Early	TCGA-AC-A23G-01	TCGA-AC-A23G	II	Early
TCGA-AC-A23E-01	TCGA-AC-A23E	II	Early	TCGA-A8-A097-01	TCGA-A8-A097	II	Early	TCGA-AC-A23H-01	TCGA-AC-A23H	II	Early
TCGA-AC-A23G-01	TCGA-AC-A23G	II	Early	TCGA-A8-A09D-01	TCGA-A8-A09D	II	Early	TCGA-AC-A2B8-01	TCGA-AC-A2B8	II	Early
TCGA-AC-A23H-01	TCGA-AC-A23H	II	Early	TCGA-A8-A09I-01	TCGA-A8-A09I	II	Early	TCGA-AC-A2BM-01	TCGA-AC-A2BM	II	Early
TCGA-AC-A2B8-01	TCGA-AC-A2B8	II	Early	TCGA-A8-A09K-01	TCGA-A8-A09K	II	Early	TCGA-AC-A2FB-01	TCGA-AC-A2FB	II	Early
TCGA-AC-A2BM-01	TCGA-AC-A2BM	II	Early	TCGA-A8-A09R-01	TCGA-A8-A09R	II	Early	TCGA-AC-A2FF-01	TCGA-AC-A2FF	II	Early
TCGA-AC-A2FB-01	TCGA-AC-A2FB	II	Early	TCGA-A8-A09V-01	TCGA-A8-A09V	II	Early	TCGA-AC-A2FG-01	TCGA-AC-A2FG	II	Early
TCGA-AC-A2FF-01	TCGA-AC-A2FF	II	Early	TCGA-A8-A09Z-01	TCGA-A8-A09Z	II	Early	TCGA-AC-A2FM-01	TCGA-AC-A2FM	II	Early
TCGA-AC-A2FG-01	TCGA-AC-A2FG	II	Early	TCGA-A8-A0A1-01	TCGA-A8-A0A1	II	Early	TCGA-AC-A2FO-01	TCGA-AC-A2FO	II	Early
TCGA-AC-A2FM-01	TCGA-AC-A2FM	II	Early	TCGA-A8-A0A2-01	TCGA-A8-A0A2	II	Early	TCGA-AC-A2QH-01	TCGA-AC-A2QH	II	Early
TCGA-AC-A2FO-01	TCGA-AC-A2FO	II	Early	TCGA-A8-A0A4-01	TCGA-A8-A0A4	II	Early	TCGA-AC-A3HN-01	TCGA-AC-A3HN	II	Early
TCGA-AC-A2QH-01	TCGA-AC-A2QH	II	Early	TCGA-A8-A0A7-01	TCGA-A8-A0A7	II	Early	TCGA-AC-A3OD-01	TCGA-AC-A3OD	II	Early
TCGA-AC-A3HN-01	TCGA-AC-A3HN	II	Early	TCGA-A8-A0A9-01	TCGA-A8-A0A9	II	Early	TCGA-AC-A3QP-01	TCGA-AC-A3QP	II	Early
TCGA-AC-A3OD-01	TCGA-AC-A3OD	II	Early	TCGA-A8-A0AB-01	TCGA-A8-A0AB	II	Early	TCGA-AC-A3TN-01	TCGA-AC-A3TN	II	Early
TCGA-AC-A3QP-01	TCGA-AC-A3QP	II	Early	TCGA-AC-A23C-01	TCGA-AC-A23C	II	Early	TCGA-AC-A3W5-01	TCGA-AC-A3W5	II	Early
TCGA-AC-A3TN-01	TCGA-AC-A3TN	II	Early	TCGA-AC-A23E-01	TCGA-AC-A23E	II	Early	TCGA-AC-A3W7-01	TCGA-AC-A3W7	II	Early
TCGA-AC-A3W5-01	TCGA-AC-A3W5	II	Early	TCGA-AC-A23G-01	TCGA-AC-A23G	II	Early	TCGA-AC-A3YJ-01	TCGA-AC-A3YJ	II	Early
TCGA-AC-A3W7-01	TCGA-AC-A3W7	II	Early	TCGA-AC-A23H-01	TCGA-AC-A23H	II	Early	TCGA-AC-A4ZE-01	TCGA-AC-A4ZE	II	Early
TCGA-AC-A3YJ-01	TCGA-AC-A3YJ	II	Early	TCGA-AC-A2B8-01	TCGA-AC-A2B8	II	Early	TCGA-AC-A5EH-01	TCGA-AC-A5EH	II	Early
TCGA-AC-A4ZE-01	TCGA-AC-A4ZE	II	Early	TCGA-AC-A2BM-01	TCGA-AC-A2BM	II	Early	TCGA-AC-A5XS-01	TCGA-AC-A5XS	II	Early
TCGA-AC-A5EH-01	TCGA-AC-A5EH	II	Early	TCGA-AC-A2FB-01	TCGA-AC-A2FB	II	Early	TCGA-AC-A5XU-01	TCGA-AC-A5XU	II	Early
TCGA-AC-A5XS-01	TCGA-AC-A5XS	II	Early	TCGA-AC-A2FF-01	TCGA-AC-A2FF	II	Early	TCGA-AC-A62X-01	TCGA-AC-A62X	II	Early
TCGA-AC-A5XU-01	TCGA-AC-A5XU	II	Early	TCGA-AC-A2FG-01	TCGA-AC-A2FG	II	Early	TCGA-AC-A62Y-01	TCGA-AC-A62Y	II	Early
TCGA-AC-A62X-01	TCGA-AC-A62X	II	Early	TCGA-AC-A2FM-01	TCGA-AC-A2FM	II	Early	TCGA-AC-A6IV-01	TCGA-AC-A6IV	II	Early
TCGA-AC-A62Y-01	TCGA-AC-A62Y	II	Early	TCGA-AC-A2FO-01	TCGA-AC-A2FO	II	Early	TCGA-AC-A6IW-01	TCGA-AC-A6IW	II	Early
TCGA-AC-A6IV-01	TCGA-AC-A6IV	II	Early	TCGA-AC-A2QH-01	TCGA-AC-A2QH	II	Early	TCGA-AC-A6NO-01	TCGA-AC-A6NO	II	Early
TCGA-AC-A6IW-01	TCGA-AC-A6IW	II	Early	TCGA-AC-A3HN-01	TCGA-AC-A3HN	II	Early	TCGA-AC-A7VB-01	TCGA-AC-A7VB	II	Early
TCGA-AC-A6NO-01	TCGA-AC-A6NO	II	Early	TCGA-AC-A3OD-01	TCGA-AC-A3OD	II	Early	TCGA-AC-A7VC-01	TCGA-AC-A7VC	II	Early
TCGA-AC-A7VB-01	TCGA-AC-A7VB	II	Early	TCGA-AC-A3QP-01	TCGA-AC-A3QP	II	Early	TCGA-AC-A8OQ-01	TCGA-AC-A8OQ	II	Early
TCGA-AC-A7VC-01	TCGA-AC-A7VC	II	Early	TCGA-AC-A3TN-01	TCGA-AC-A3TN	II	Early	TCGA-AC-A8OS-01	TCGA-AC-A8OS	II	Early
TCGA-AC-A8OQ-01	TCGA-AC-A8OQ	II	Early	TCGA-AC-A3W5-01	TCGA-AC-A3W5	II	Early	TCGA-AN-A03X-01	TCGA-AN-A03X	II	Early
TCGA-AC-A8OS-01	TCGA-AC-A8OS	II	Early	TCGA-AC-A3W7-01	TCGA-AC-A3W7	II	Early	TCGA-AN-A03Y-01	TCGA-AN-A03Y	II	Early
TCGA-AN-A03X-01	TCGA-AN-A03X	II	Early	TCGA-AC-A3YJ-01	TCGA-AC-A3YJ	II	Early	TCGA-AN-A041-01	TCGA-AN-A041	II	Early
TCGA-AN-A03Y-01	TCGA-AN-A03Y	II	Early	TCGA-AC-A4ZE-01	TCGA-AC-A4ZE	II	Early	TCGA-AN-A046-01	TCGA-AN-A046	II	Early
TCGA-AN-A041-01	TCGA-AN-A041	II	Early	TCGA-AC-A5EH-01	TCGA-AC-A5EH	II	Early	TCGA-AN-A049-01	TCGA-AN-A049	II	Early
TCGA-AN-A046-01	TCGA-AN-A046	II	Early	TCGA-AC-A5XS-01	TCGA-AC-A5XS	II	Early	TCGA-AN-A04C-01	TCGA-AN-A04C	II	Early
TCGA-AN-A049-01	TCGA-AN-A049	II	Early	TCGA-AC-A5XU-01	TCGA-AC-A5XU	II	Early	TCGA-AN-A04D-01	TCGA-AN-A04D	II	Early
TCGA-AN-A04C-01	TCGA-AN-A04C	II	Early	TCGA-AC-A62X-01	TCGA-AC-A62X	II	Early	TCGA-AN-A0AJ-01	TCGA-AN-A0AJ	II	Early
TCGA-AN-A04D-01	TCGA-AN-A04D	II	Early	TCGA-AC-A62Y-01	TCGA-AC-A62Y	II	Early	TCGA-AN-A0AK-01	TCGA-AN-A0AK	II	Early
TCGA-AN-A0AJ-01	TCGA-AN-A0AJ	II	Early	TCGA-AC-A6IV-01	TCGA-AC-A6IV	II	Early	TCGA-AN-A0AM-01	TCGA-AN-A0AM	II	Early
TCGA-AN-A0AK-01	TCGA-AN-A0AK	II	Early	TCGA-AC-A6IW-01	TCGA-AC-A6IW	II	Early	TCGA-AN-A0AR-01	TCGA-AN-A0AR	II	Early
TCGA-AN-A0AM-01	TCGA-AN-A0AM	II	Early	TCGA-AC-A6NO-01	TCGA-AC-A6NO	II	Early	TCGA-AN-A0AT-01	TCGA-AN-A0AT	II	Early
TCGA-AN-A0AR-01	TCGA-AN-A0AR	II	Early	TCGA-AC-A7VB-01	TCGA-AC-A7VB	II	Early	TCGA-AN-A0FD-01	TCGA-AN-A0FD	II	Early
TCGA-AN-A0AT-01	TCGA-AN-A0AT	II	Early	TCGA-AC-A7VC-01	TCGA-AC-A7VC	II	Early	TCGA-AN-A0FL-01	TCGA-AN-A0FL	II	Early
TCGA-AN-A0FD-01	TCGA-AN-A0FD	II	Early	TCGA-AC-A8OQ-01	TCGA-AC-A8OQ	II	Early	TCGA-AN-A0FT-01	TCGA-AN-A0FT	II	Early
TCGA-AN-A0FL-01	TCGA-AN-A0FL	II	Early	TCGA-AC-A8OS-01	TCGA-AC-A8OS	II	Early	TCGA-AN-A0FV-01	TCGA-AN-A0FV	II	Early
TCGA-AN-A0FT-01	TCGA-AN-A0FT	II	Early	TCGA-AN-A03X-01	TCGA-AN-A03X	II	Early	TCGA-AN-A0FX-01	TCGA-AN-A0FX	II	Early
TCGA-AN-A0FV-01	TCGA-AN-A0FV	II	Early	TCGA-AN-A03Y-01	TCGA-AN-A03Y	II	Early	TCGA-AN-A0G0-01	TCGA-AN-A0G0	II	Early
TCGA-AN-A0FX-01	TCGA-AN-A0FX	II	Early	TCGA-AN-A041-01	TCGA-AN-A041	II	Early	TCGA-AN-A0XL-01	TCGA-AN-A0XL	II	Early
TCGA-AN-A0G0-01	TCGA-AN-A0G0	II	Early	TCGA-AN-A046-01	TCGA-AN-A046	II	Early	TCGA-AN-A0XU-01	TCGA-AN-A0XU	II	Early
TCGA-AN-A0XL-01	TCGA-AN-A0XL	II	Early	TCGA-AN-A049-01	TCGA-AN-A049	II	Early	TCGA-AO-A03N-01	TCGA-AO-A03N	II	Early
TCGA-AN-A0XU-01	TCGA-AN-A0XU	II	Early	TCGA-AN-A04C-01	TCGA-AN-A04C	II	Early	TCGA-AO-A03O-01	TCGA-AO-A03O	II	Early
TCGA-AO-A03N-01	TCGA-AO-A03N	II	Early	TCGA-AN-A04D-01	TCGA-AN-A04D	II	Early	TCGA-AO-A03R-01	TCGA-AO-A03R	II	Early
TCGA-AO-A03O-01	TCGA-AO-A03O	II	Early	TCGA-AN-A0AJ-01	TCGA-AN-A0AJ	II	Early	TCGA-AO-A03T-01	TCGA-AO-A03T	II	Early
TCGA-AO-A03R-01	TCGA-AO-A03R	II	Early	TCGA-AN-A0AK-01	TCGA-AN-A0AK	II	Early	TCGA-AO-A0J3-01	TCGA-AO-A0J3	II	Early
TCGA-AO-A03T-01	TCGA-AO-A03T	II	Early	TCGA-AN-A0AM-01	TCGA-AN-A0AM	II	Early	TCGA-AO-A0J6-01	TCGA-AO-A0J6	II	Early
TCGA-AO-A0J3-01	TCGA-AO-A0J3	II	Early	TCGA-AN-A0AR-01	TCGA-AN-A0AR	II	Early	TCGA-AO-A0J7-01	TCGA-AO-A0J7	II	Early
TCGA-AO-A0J6-01	TCGA-AO-A0J6	II	Early	TCGA-AN-A0AT-01	TCGA-AN-A0AT	II	Early	TCGA-AO-A0J8-01	TCGA-AO-A0J8	II	Early
TCGA-AO-A0J7-01	TCGA-AO-A0J7	II	Early	TCGA-AN-A0FD-01	TCGA-AN-A0FD	II	Early	TCGA-AO-A0JC-01	TCGA-AO-A0JC	II	Early
TCGA-AO-A0J8-01	TCGA-AO-A0J8	II	Early	TCGA-AN-A0FL-01	TCGA-AN-A0FL	II	Early	TCGA-AO-A0JF-01	TCGA-AO-A0JF	II	Early
TCGA-AO-A0JC-01	TCGA-AO-A0JC	II	Early	TCGA-AN-A0FT-01	TCGA-AN-A0FT	II	Early	TCGA-AO-A0JI-01	TCGA-AO-A0JI	II	Early
TCGA-AO-A0JF-01	TCGA-AO-A0JF	II	Early	TCGA-AN-A0FV-01	TCGA-AN-A0FV	II	Early	TCGA-AO-A0JJ-01	TCGA-AO-A0JJ	II	Early
TCGA-AO-A0JI-01	TCGA-AO-A0JI	II	Early	TCGA-AN-A0FX-01	TCGA-AN-A0FX	II	Early	TCGA-AO-A0JM-01	TCGA-AO-A0JM	II	Early
TCGA-AO-A0JJ-01	TCGA-AO-A0JJ	II	Early	TCGA-AN-A0G0-01	TCGA-AN-A0G0	II	Early	TCGA-AO-A124-01	TCGA-AO-A124	II	Early
TCGA-AO-A0JM-01	TCGA-AO-A0JM	II	Early	TCGA-AN-A0XL-01	TCGA-AN-A0XL	II	Early	TCGA-AO-A125-01	TCGA-AO-A125	II	Early
TCGA-AO-A124-01	TCGA-AO-A124	II	Early	TCGA-AN-A0XU-01	TCGA-AN-A0XU	II	Early	TCGA-AO-A126-01	TCGA-AO-A126	II	Early
TCGA-AO-A125-01	TCGA-AO-A125	II	Early	TCGA-AO-A03N-01	TCGA-AO-A03N	II	Early	TCGA-AO-A128-01	TCGA-AO-A128	II	Early
TCGA-AO-A126-01	TCGA-AO-A126	II	Early	TCGA-AO-A03O-01	TCGA-AO-A03O	II	Early	TCGA-AO-A129-01	TCGA-AO-A129	II	Early
TCGA-AO-A128-01	TCGA-AO-A128	II	Early	TCGA-AO-A03P-01	TCGA-AO-A03P	II	Early	TCGA-AO-A12A-01	TCGA-AO-A12A	II	Early
TCGA-AO-A129-01	TCGA-AO-A129	II	Early	TCGA-AO-A03R-01	TCGA-AO-A03R	II	Early	TCGA-AO-A12B-01	TCGA-AO-A12B	II	Early
TCGA-AO-A12A-01	TCGA-AO-A12A	II	Early	TCGA-AO-A03T-01	TCGA-AO-A03T	II	Early	TCGA-AO-A12C-01	TCGA-AO-A12C	II	Early
TCGA-AO-A12B-01	TCGA-AO-A12B	II	Early	TCGA-AO-A0J3-01	TCGA-AO-A0J3	II	Early	TCGA-AO-A12D-01	TCGA-AO-A12D	II	Early
TCGA-AO-A12C-01	TCGA-AO-A12C	II	Early	TCGA-AO-A0J6-01	TCGA-AO-A0J6	II	Early	TCGA-AO-A12E-01	TCGA-AO-A12E	II	Early
TCGA-AO-A12D-01	TCGA-AO-A12D	II	Early	TCGA-AO-A0J7-01	TCGA-AO-A0J7	II	Early	TCGA-AO-A12F-01	TCGA-AO-A12F	II	Early
TCGA-AO-A12E-01	TCGA-AO-A12E	II	Early	TCGA-AO-A0J8-01	TCGA-AO-A0J8	II	Early	TCGA-AO-A12G-01	TCGA-AO-A12G	II	Early
TCGA-AO-A12F-01	TCGA-AO-A12F	II	Early	TCGA-AO-A0JC-01	TCGA-AO-A0JC	II	Early	TCGA-AO-A12H-01	TCGA-AO-A12H	II	Early
TCGA-AO-A12G-01	TCGA-AO-A12G	II	Early	TCGA-AO-A0JF-01	TCGA-AO-A0JF	II	Early	TCGA-AO-A1KO-01	TCGA-AO-A1KO	II	Early
TCGA-AO-A12H-01	TCGA-AO-A12H	II	Early	TCGA-AO-A0JI-01	TCGA-AO-A0JI	II	Early	TCGA-AO-A1KP-01	TCGA-AO-A1KP	II	Early
TCGA-AO-A1KO-01	TCGA-AO-A1KO	II	Early	TCGA-AO-A0JJ-01	TCGA-AO-A0JJ	II	Early	TCGA-AO-A1KR-01	TCGA-AO-A1KR	II	Early
TCGA-AO-A1KP-01	TCGA-AO-A1KP	II	Early	TCGA-AO-A0JM-01	TCGA-AO-A0JM	II	Early	TCGA-AO-A1KS-01	TCGA-AO-A1KS	II	Early
TCGA-AO-A1KR-01	TCGA-AO-A1KR	II	Early	TCGA-AO-A124-01	TCGA-AO-A124	II	Early	TCGA-AO-A1KT-01	TCGA-AO-A1KT	II	Early
TCGA-AO-A1KS-01	TCGA-AO-A1KS	II	Early	TCGA-AO-A125-01	TCGA-AO-A125	II	Early	TCGA-AQ-A04J-01	TCGA-AQ-A04J	II	Early
TCGA-AO-A1KT-01	TCGA-AO-A1KT	II	Early	TCGA-AO-A126-01	TCGA-AO-A126	II	Early	TCGA-AQ-A04L-01	TCGA-AQ-A04L	II	Early
TCGA-AQ-A04J-01	TCGA-AQ-A04J	II	Early	TCGA-AO-A128-01	TCGA-AO-A128	II	Early	TCGA-AQ-A54N-01	TCGA-AQ-A54N	II	Early
TCGA-AQ-A04L-01	TCGA-AQ-A04L	II	Early	TCGA-AO-A129-01	TCGA-AO-A129	II	Early	TCGA-AQ-A54O-01	TCGA-AQ-A54O	II	Early
TCGA-AQ-A54N-01	TCGA-AQ-A54N	II	Early	TCGA-AO-A12A-01	TCGA-AO-A12A	II	Early	TCGA-AR-A0TP-01	TCGA-AR-A0TP	II	Early
TCGA-AQ-A54O-01	TCGA-AQ-A54O	II	Early	TCGA-AO-A12B-01	TCGA-AO-A12B	II	Early	TCGA-AR-A0TR-01	TCGA-AR-A0TR	II	Early
TCGA-AR-A0TP-01	TCGA-AR-A0TP	II	Early	TCGA-AO-A12C-01	TCGA-AO-A12C	II	Early	TCGA-AR-A0TS-01	TCGA-AR-A0TS	II	Early
TCGA-AR-A0TR-01	TCGA-AR-A0TR	II	Early	TCGA-AO-A12D-01	TCGA-AO-A12D	II	Early	TCGA-AR-A0TV-01	TCGA-AR-A0TV	II	Early
TCGA-AR-A0TS-01	TCGA-AR-A0TS	II	Early	TCGA-AO-A12E-01	TCGA-AO-A12E	II	Early	TCGA-AR-A0TX-01	TCGA-AR-A0TX	II	Early
TCGA-AR-A0TV-01	TCGA-AR-A0TV	II	Early	TCGA-AO-A12F-01	TCGA-AO-A12F	II	Early	TCGA-AR-A0TY-01	TCGA-AR-A0TY	II	Early
TCGA-AR-A0TX-01	TCGA-AR-A0TX	II	Early	TCGA-AO-A12G-01	TCGA-AO-A12G	II	Early	TCGA-AR-A0U3-01	TCGA-AR-A0U3	II	Early
TCGA-AR-A0TY-01	TCGA-AR-A0TY	II	Early	TCGA-AO-A12H-01	TCGA-AO-A12H	II	Early	TCGA-AR-A0U4-01	TCGA-AR-A0U4	II	Early
TCGA-AR-A0U3-01	TCGA-AR-A0U3	II	Early	TCGA-AO-A1KO-01	TCGA-AO-A1KO	II	Early	TCGA-AR-A1AH-01	TCGA-AR-A1AH	II	Early
TCGA-AR-A0U4-01	TCGA-AR-A0U4	II	Early	TCGA-AO-A1KP-01	TCGA-AO-A1KP	II	Early	TCGA-AR-A1AI-01	TCGA-AR-A1AI	II	Early
TCGA-AR-A1AH-01	TCGA-AR-A1AH	II	Early	TCGA-AO-A1KR-01	TCGA-AO-A1KR	II	Early	TCGA-AR-A1AN-01	TCGA-AR-A1AN	II	Early
TCGA-AR-A1AI-01	TCGA-AR-A1AI	II	Early	TCGA-AO-A1KS-01	TCGA-AO-A1KS	II	Early	TCGA-AR-A1AO-01	TCGA-AR-A1AO	II	Early
TCGA-AR-A1AN-01	TCGA-AR-A1AN	II	Early	TCGA-AO-A1KT-01	TCGA-AO-A1KT	II	Early	TCGA-AR-A1AQ-01	TCGA-AR-A1AQ	II	Early
TCGA-AR-A1AO-01	TCGA-AR-A1AO	II	Early	TCGA-AQ-A04J-01	TCGA-AQ-A04J	II	Early	TCGA-AR-A1AS-01	TCGA-AR-A1AS	II	Early
TCGA-AR-A1AQ-01	TCGA-AR-A1AQ	II	Early	TCGA-AQ-A04L-01	TCGA-AQ-A04L	II	Early	TCGA-AR-A1AT-01	TCGA-AR-A1AT	II	Early
TCGA-AR-A1AS-01	TCGA-AR-A1AS	II	Early	TCGA-AQ-A54N-01	TCGA-AQ-A54N	II	Early	TCGA-AR-A1AV-01	TCGA-AR-A1AV	II	Early
TCGA-AR-A1AT-01	TCGA-AR-A1AT	II	Early	TCGA-AQ-A54O-01	TCGA-AQ-A54O	II	Early	TCGA-AR-A1AW-01	TCGA-AR-A1AW	II	Early
TCGA-AR-A1AV-01	TCGA-AR-A1AV	II	Early	TCGA-AR-A0TP-01	TCGA-AR-A0TP	II	Early	TCGA-AR-A24H-01	TCGA-AR-A24H	II	Early
TCGA-AR-A1AW-01	TCGA-AR-A1AW	II	Early	TCGA-AR-A0TR-01	TCGA-AR-A0TR	II	Early	TCGA-AR-A24K-01	TCGA-AR-A24K	II	Early
TCGA-AR-A24H-01	TCGA-AR-A24H	II	Early	TCGA-AR-A0TS-01	TCGA-AR-A0TS	II	Early	TCGA-AR-A24L-01	TCGA-AR-A24L	II	Early
TCGA-AR-A24K-01	TCGA-AR-A24K	II	Early	TCGA-AR-A0TU-01	TCGA-AR-A0TU	II	Early	TCGA-AR-A24Q-01	TCGA-AR-A24Q	II	Early
TCGA-AR-A24L-01	TCGA-AR-A24L	II	Early	TCGA-AR-A0TV-01	TCGA-AR-A0TV	II	Early	TCGA-AR-A24U-01	TCGA-AR-A24U	II	Early
TCGA-AR-A24Q-01	TCGA-AR-A24Q	II	Early	TCGA-AR-A0TX-01	TCGA-AR-A0TX	II	Early	TCGA-AR-A24V-01	TCGA-AR-A24V	II	Early
TCGA-AR-A24U-01	TCGA-AR-A24U	II	Early	TCGA-AR-A0TY-01	TCGA-AR-A0TY	II	Early	TCGA-AR-A24W-01	TCGA-AR-A24W	II	Early
TCGA-AR-A24V-01	TCGA-AR-A24V	II	Early	TCGA-AR-A0U0-01	TCGA-AR-A0U0	II	Early	TCGA-AR-A24X-01	TCGA-AR-A24X	II	Early
TCGA-AR-A24W-01	TCGA-AR-A24W	II	Early	TCGA-AR-A0U3-01	TCGA-AR-A0U3	II	Early	TCGA-AR-A24Z-01	TCGA-AR-A24Z	II	Early
TCGA-AR-A24X-01	TCGA-AR-A24X	II	Early	TCGA-AR-A0U4-01	TCGA-AR-A0U4	II	Early	TCGA-AR-A250-01	TCGA-AR-A250	II	Early
TCGA-AR-A24Z-01	TCGA-AR-A24Z	II	Early	TCGA-AR-A1AH-01	TCGA-AR-A1AH	II	Early	TCGA-AR-A256-01	TCGA-AR-A256	II	Early
TCGA-AR-A250-01	TCGA-AR-A250	II	Early	TCGA-AR-A1AI-01	TCGA-AR-A1AI	II	Early	TCGA-AR-A2LL-01	TCGA-AR-A2LL	II	Early
TCGA-AR-A256-01	TCGA-AR-A256	II	Early	TCGA-AR-A1AN-01	TCGA-AR-A1AN	II	Early	TCGA-AR-A2LM-01	TCGA-AR-A2LM	II	Early
TCGA-AR-A2LL-01	TCGA-AR-A2LL	II	Early	TCGA-AR-A1AO-01	TCGA-AR-A1AO	II	Early	TCGA-AR-A2LN-01	TCGA-AR-A2LN	II	Early
TCGA-AR-A2LM-01	TCGA-AR-A2LM	II	Early	TCGA-AR-A1AQ-01	TCGA-AR-A1AQ	II	Early	TCGA-AR-A2LO-01	TCGA-AR-A2LO	II	Early
TCGA-AR-A2LN-01	TCGA-AR-A2LN	II	Early	TCGA-AR-A1AS-01	TCGA-AR-A1AS	II	Early	TCGA-AR-A2LQ-01	TCGA-AR-A2LQ	II	Early
TCGA-AR-A2LO-01	TCGA-AR-A2LO	II	Early	TCGA-AR-A1AT-01	TCGA-AR-A1AT	II	Early	TCGA-AR-A5QM-01	TCGA-AR-A5QM	II	Early
TCGA-AR-A2LQ-01	TCGA-AR-A2LQ	II	Early	TCGA-AR-A1AV-01	TCGA-AR-A1AV	II	Early	TCGA-AR-A5QP-01	TCGA-AR-A5QP	II	Early
TCGA-AR-A5QM-01	TCGA-AR-A5QM	II	Early	TCGA-AR-A1AW-01	TCGA-AR-A1AW	II	Early	TCGA-B6-A0I1-01	TCGA-B6-A0I1	II	Early
TCGA-AR-A5QP-01	TCGA-AR-A5QP	II	Early	TCGA-AR-A24H-01	TCGA-AR-A24H	II	Early	TCGA-B6-A0I5-01	TCGA-B6-A0I5	II	Early
TCGA-B6-A0I1-01	TCGA-B6-A0I1	II	Early	TCGA-AR-A24K-01	TCGA-AR-A24K	II	Early	TCGA-B6-A0I6-01	TCGA-B6-A0I6	II	Early
TCGA-B6-A0I5-01	TCGA-B6-A0I5	II	Early	TCGA-AR-A24L-01	TCGA-AR-A24L	II	Early	TCGA-B6-A0IA-01	TCGA-B6-A0IA	II	Early
TCGA-B6-A0I6-01	TCGA-B6-A0I6	II	Early	TCGA-AR-A24Q-01	TCGA-AR-A24Q	II	Early	TCGA-B6-A0IG-01	TCGA-B6-A0IG	II	Early
TCGA-B6-A0IA-01	TCGA-B6-A0IA	II	Early	TCGA-AR-A24U-01	TCGA-AR-A24U	II	Early	TCGA-B6-A0IJ-01	TCGA-B6-A0IJ	II	Early
TCGA-B6-A0IG-01	TCGA-B6-A0IG	II	Early	TCGA-AR-A24V-01	TCGA-AR-A24V	II	Early	TCGA-B6-A0IM-01	TCGA-B6-A0IM	II	Early
TCGA-B6-A0IJ-01	TCGA-B6-A0IJ	II	Early	TCGA-AR-A24W-01	TCGA-AR-A24W	II	Early	TCGA-B6-A0IO-01	TCGA-B6-A0IO	II	Early
TCGA-B6-A0IM-01	TCGA-B6-A0IM	II	Early	TCGA-AR-A24X-01	TCGA-AR-A24X	II	Early	TCGA-B6-A0RG-01	TCGA-B6-A0RG	II	Early
TCGA-B6-A0IO-01	TCGA-B6-A0IO	II	Early	TCGA-AR-A24Z-01	TCGA-AR-A24Z	II	Early	TCGA-B6-A0RH-01	TCGA-B6-A0RH	II	Early
TCGA-B6-A0RG-01	TCGA-B6-A0RG	II	Early	TCGA-AR-A250-01	TCGA-AR-A250	II	Early	TCGA-B6-A0RL-01	TCGA-B6-A0RL	II	Early
TCGA-B6-A0RH-01	TCGA-B6-A0RH	II	Early	TCGA-AR-A256-01	TCGA-AR-A256	II	Early	TCGA-B6-A0RQ-01	TCGA-B6-A0RQ	II	Early
TCGA-B6-A0RL-01	TCGA-B6-A0RL	II	Early	TCGA-AR-A2LL-01	TCGA-AR-A2LL	II	Early	TCGA-B6-A0RS-01	TCGA-B6-A0RS	II	Early
TCGA-B6-A0RQ-01	TCGA-B6-A0RQ	II	Early	TCGA-AR-A2LM-01	TCGA-AR-A2LM	II	Early	TCGA-B6-A0WT-01	TCGA-B6-A0WT	II	Early
TCGA-B6-A0RS-01	TCGA-B6-A0RS	II	Early	TCGA-AR-A2LN-01	TCGA-AR-A2LN	II	Early	TCGA-B6-A0WV-01	TCGA-B6-A0WV	II	Early
TCGA-B6-A0WT-01	TCGA-B6-A0WT	II	Early	TCGA-AR-A2LO-01	TCGA-AR-A2LO	II	Early	TCGA-B6-A0WZ-01	TCGA-B6-A0WZ	II	Early
TCGA-B6-A0WV-01	TCGA-B6-A0WV	II	Early	TCGA-AR-A2LQ-01	TCGA-AR-A2LQ	II	Early	TCGA-B6-A0X4-01	TCGA-B6-A0X4	II	Early
TCGA-B6-A0WZ-01	TCGA-B6-A0WZ	II	Early	TCGA-AR-A5QM-01	TCGA-AR-A5QM	II	Early	TCGA-B6-A0X5-01	TCGA-B6-A0X5	II	Early
TCGA-B6-A0X4-01	TCGA-B6-A0X4	II	Early	TCGA-AR-A5QP-01	TCGA-AR-A5QP	II	Early	TCGA-B6-A1KC-01	TCGA-B6-A1KC	II	Early
TCGA-B6-A0X5-01	TCGA-B6-A0X5	II	Early	TCGA-B6-A0I1-01	TCGA-B6-A0I1	II	Early	TCGA-B6-A1KF-01	TCGA-B6-A1KF	II	Early
TCGA-B6-A1KC-01	TCGA-B6-A1KC	II	Early	TCGA-B6-A0I5-01	TCGA-B6-A0I5	II	Early	TCGA-B6-A2IU-01	TCGA-B6-A2IU	II	Early
TCGA-B6-A1KF-01	TCGA-B6-A1KF	II	Early	TCGA-B6-A0I6-01	TCGA-B6-A0I6	II	Early	TCGA-B6-A401-01	TCGA-B6-A401	II	Early
TCGA-B6-A2IU-01	TCGA-B6-A2IU	II	Early	TCGA-B6-A0IA-01	TCGA-B6-A0IA	II	Early	TCGA-B6-A40C-01	TCGA-B6-A40C	II	Early
TCGA-B6-A401-01	TCGA-B6-A401	II	Early	TCGA-B6-A0IG-01	TCGA-B6-A0IG	II	Early	TCGA-BH-A0AU-01	TCGA-BH-A0AU	II	Early
TCGA-B6-A40C-01	TCGA-B6-A40C	II	Early	TCGA-B6-A0IJ-01	TCGA-B6-A0IJ	II	Early	TCGA-BH-A0AW-01	TCGA-BH-A0AW	II	Early
TCGA-BH-A0AU-01	TCGA-BH-A0AU	II	Early	TCGA-B6-A0IM-01	TCGA-B6-A0IM	II	Early	TCGA-BH-A0AY-01	TCGA-BH-A0AY	II	Early
TCGA-BH-A0AW-01	TCGA-BH-A0AW	II	Early	TCGA-B6-A0IO-01	TCGA-B6-A0IO	II	Early	TCGA-BH-A0B1-01	TCGA-BH-A0B1	II	Early
TCGA-BH-A0AY-01	TCGA-BH-A0AY	II	Early	TCGA-B6-A0RG-01	TCGA-B6-A0RG	II	Early	TCGA-BH-A0B3-01	TCGA-BH-A0B3	II	Early
TCGA-BH-A0B1-01	TCGA-BH-A0B1	II	Early	TCGA-B6-A0RH-01	TCGA-B6-A0RH	II	Early	TCGA-BH-A0B7-01	TCGA-BH-A0B7	II	Early
TCGA-BH-A0B3-01	TCGA-BH-A0B3	II	Early	TCGA-B6-A0RL-01	TCGA-B6-A0RL	II	Early	TCGA-BH-A0BD-01	TCGA-BH-A0BD	II	Early
TCGA-BH-A0B7-01	TCGA-BH-A0B7	II	Early	TCGA-B6-A0RQ-01	TCGA-B6-A0RQ	II	Early	TCGA-BH-A0BF-01	TCGA-BH-A0BF	II	Early
TCGA-BH-A0BD-01	TCGA-BH-A0BD	II	Early	TCGA-B6-A0RS-01	TCGA-B6-A0RS	II	Early	TCGA-BH-A0BJ-01	TCGA-BH-A0BJ	II	Early
TCGA-BH-A0BF-01	TCGA-BH-A0BF	II	Early	TCGA-B6-A0WT-01	TCGA-B6-A0WT	II	Early	TCGA-BH-A0BM-01	TCGA-BH-A0BM	II	Early
TCGA-BH-A0BJ-01	TCGA-BH-A0BJ	II	Early	TCGA-B6-A0WV-01	TCGA-B6-A0WV	II	Early	TCGA-BH-A0BT-01	TCGA-BH-A0BT	II	Early
TCGA-BH-A0BM-01	TCGA-BH-A0BM	II	Early	TCGA-B6-A0WZ-01	TCGA-B6-A0WZ	II	Early	TCGA-BH-A0BV-01	TCGA-BH-A0BV	II	Early
TCGA-BH-A0BT-01	TCGA-BH-A0BT	II	Early	TCGA-B6-A0X4-01	TCGA-B6-A0X4	II	Early	TCGA-BH-A0C0-01	TCGA-BH-A0C0	II	Early
TCGA-BH-A0BV-01	TCGA-BH-A0BV	II	Early	TCGA-B6-A0X5-01	TCGA-B6-A0X5	II	Early	TCGA-BH-A0C7-01	TCGA-BH-A0C7	II	Early
TCGA-BH-A0C0-01	TCGA-BH-A0C0	II	Early	TCGA-B6-A1KC-01	TCGA-B6-A1KC	II	Early	TCGA-BH-A0DD-01	TCGA-BH-A0DD	II	Early
TCGA-BH-A0C7-01	TCGA-BH-A0C7	II	Early	TCGA-B6-A1KF-01	TCGA-B6-A1KF	II	Early	TCGA-BH-A0DE-01	TCGA-BH-A0DE	II	Early
TCGA-BH-A0DD-01	TCGA-BH-A0DD	II	Early	TCGA-B6-A2IU-01	TCGA-B6-A2IU	II	Early	TCGA-BH-A0DG-01	TCGA-BH-A0DG	II	Early
TCGA-BH-A0DE-01	TCGA-BH-A0DE	II	Early	TCGA-B6-A401-01	TCGA-B6-A401	II	Early	TCGA-BH-A0DH-01	TCGA-BH-A0DH	II	Early
TCGA-BH-A0DG-01	TCGA-BH-A0DG	II	Early	TCGA-B6-A40C-01	TCGA-B6-A40C	II	Early	TCGA-BH-A0DI-01	TCGA-BH-A0DI	II	Early
TCGA-BH-A0DH-01	TCGA-BH-A0DH	II	Early	TCGA-BH-A0AU-01	TCGA-BH-A0AU	II	Early	TCGA-BH-A0DK-01	TCGA-BH-A0DK	II	Early
TCGA-BH-A0DI-01	TCGA-BH-A0DI	II	Early	TCGA-BH-A0AW-01	TCGA-BH-A0AW	II	Early	TCGA-BH-A0DL-01	TCGA-BH-A0DL	II	Early
TCGA-BH-A0DK-01	TCGA-BH-A0DK	II	Early	TCGA-BH-A0AY-01	TCGA-BH-A0AY	II	Early	TCGA-BH-A0DP-01	TCGA-BH-A0DP	II	Early
TCGA-BH-A0DL-01	TCGA-BH-A0DL	II	Early	TCGA-BH-A0B1-01	TCGA-BH-A0B1	II	Early	TCGA-BH-A0DQ-01	TCGA-BH-A0DQ	II	Early
TCGA-BH-A0DP-01	TCGA-BH-A0DP	II	Early	TCGA-BH-A0B3-01	TCGA-BH-A0B3	II	Early	TCGA-BH-A0DT-01	TCGA-BH-A0DT	II	Early
TCGA-BH-A0DQ-01	TCGA-BH-A0DQ	II	Early	TCGA-BH-A0B7-01	TCGA-BH-A0B7	II	Early	TCGA-BH-A0DZ-01	TCGA-BH-A0DZ	II	Early
TCGA-BH-A0DT-01	TCGA-BH-A0DT	II	Early	TCGA-BH-A0BD-01	TCGA-BH-A0BD	II	Early	TCGA-BH-A0E1-01	TCGA-BH-A0E1	II	Early
TCGA-BH-A0DZ-01	TCGA-BH-A0DZ	II	Early	TCGA-BH-A0BF-01	TCGA-BH-A0BF	II	Early	TCGA-BH-A0E7-01	TCGA-BH-A0E7	II	Early
TCGA-BH-A0E1-01	TCGA-BH-A0E1	II	Early	TCGA-BH-A0BJ-01	TCGA-BH-A0BJ	II	Early	TCGA-BH-A0E9-01	TCGA-BH-A0E9	II	Early
TCGA-BH-A0E7-01	TCGA-BH-A0E7	II	Early	TCGA-BH-A0BM-01	TCGA-BH-A0BM	II	Early	TCGA-BH-A0EA-01	TCGA-BH-A0EA	II	Early
TCGA-BH-A0E9-01	TCGA-BH-A0E9	II	Early	TCGA-BH-A0BT-01	TCGA-BH-A0BT	II	Early	TCGA-BH-A0EE-01	TCGA-BH-A0EE	II	Early
TCGA-BH-A0EA-01	TCGA-BH-A0EA	II	Early	TCGA-BH-A0BV-01	TCGA-BH-A0BV	II	Early	TCGA-BH-A0EI-01	TCGA-BH-A0EI	II	Early
TCGA-BH-A0EE-01	TCGA-BH-A0EE	II	Early	TCGA-BH-A0C0-01	TCGA-BH-A0C0	II	Early	TCGA-BH-A0GY-01	TCGA-BH-A0GY	II	Early
TCGA-BH-A0EI-01	TCGA-BH-A0EI	II	Early	TCGA-BH-A0C7-01	TCGA-BH-A0C7	II	Early	TCGA-BH-A0GZ-01	TCGA-BH-A0GZ	II	Early
TCGA-BH-A0GY-01	TCGA-BH-A0GY	II	Early	TCGA-BH-A0DD-01	TCGA-BH-A0DD	II	Early	TCGA-BH-A0H9-01	TCGA-BH-A0H9	II	Early
TCGA-BH-A0GZ-01	TCGA-BH-A0GZ	II	Early	TCGA-BH-A0DE-01	TCGA-BH-A0DE	II	Early	TCGA-BH-A0HK-01	TCGA-BH-A0HK	II	Early
TCGA-BH-A0H9-01	TCGA-BH-A0H9	II	Early	TCGA-BH-A0DG-01	TCGA-BH-A0DG	II	Early	TCGA-BH-A0HL-01	TCGA-BH-A0HL	II	Early
TCGA-BH-A0HK-01	TCGA-BH-A0HK	II	Early	TCGA-BH-A0DH-01	TCGA-BH-A0DH	II	Early	TCGA-BH-A0HO-01	TCGA-BH-A0HO	II	Early
TCGA-BH-A0HL-01	TCGA-BH-A0HL	II	Early	TCGA-BH-A0DI-01	TCGA-BH-A0DI	II	Early	TCGA-BH-A0HQ-01	TCGA-BH-A0HQ	II	Early
TCGA-BH-A0HO-01	TCGA-BH-A0HO	II	Early	TCGA-BH-A0DK-01	TCGA-BH-A0DK	II	Early	TCGA-BH-A0HX-01	TCGA-BH-A0HX	II	Early
TCGA-BH-A0HQ-01	TCGA-BH-A0HQ	II	Early	TCGA-BH-A0DL-01	TCGA-BH-A0DL	II	Early	TCGA-BH-A0RX-01	TCGA-BH-A0RX	II	Early
TCGA-BH-A0HX-01	TCGA-BH-A0HX	II	Early	TCGA-BH-A0DP-01	TCGA-BH-A0DP	II	Early	TCGA-BH-A0W3-01	TCGA-BH-A0W3	II	Early
TCGA-BH-A0RX-01	TCGA-BH-A0RX	II	Early	TCGA-BH-A0DQ-01	TCGA-BH-A0DQ	II	Early	TCGA-BH-A0W4-01	TCGA-BH-A0W4	II	Early
TCGA-BH-A0W3-01	TCGA-BH-A0W3	II	Early	TCGA-BH-A0DT-01	TCGA-BH-A0DT	II	Early	TCGA-BH-A0W5-01	TCGA-BH-A0W5	II	Early
TCGA-BH-A0W4-01	TCGA-BH-A0W4	II	Early	TCGA-BH-A0DZ-01	TCGA-BH-A0DZ	II	Early	TCGA-BH-A18F-01	TCGA-BH-A18F	II	Early
TCGA-BH-A0W5-01	TCGA-BH-A0W5	II	Early	TCGA-BH-A0E1-01	TCGA-BH-A0E1	II	Early	TCGA-BH-A18I-01	TCGA-BH-A18I	II	Early
TCGA-BH-A18F-01	TCGA-BH-A18F	II	Early	TCGA-BH-A0E7-01	TCGA-BH-A0E7	II	Early	TCGA-BH-A18N-01	TCGA-BH-A18N	II	Early
TCGA-BH-A18I-01	TCGA-BH-A18I	II	Early	TCGA-BH-A0E9-01	TCGA-BH-A0E9	II	Early	TCGA-BH-A18Q-01	TCGA-BH-A18Q	II	Early
TCGA-BH-A18N-01	TCGA-BH-A18N	II	Early	TCGA-BH-A0EA-01	TCGA-BH-A0EA	II	Early	TCGA-BH-A18R-01	TCGA-BH-A18R	II	Early
TCGA-BH-A18Q-01	TCGA-BH-A18Q	II	Early	TCGA-BH-A0EE-01	TCGA-BH-A0EE	II	Early	TCGA-BH-A18T-01	TCGA-BH-A18T	II	Early
TCGA-BH-A18R-01	TCGA-BH-A18R	II	Early	TCGA-BH-A0EI-01	TCGA-BH-A0EI	II	Early	TCGA-BH-A18V-01	TCGA-BH-A18V	II	Early
TCGA-BH-A18T-01	TCGA-BH-A18T	II	Early	TCGA-BH-A0GY-01	TCGA-BH-A0GY	II	Early	TCGA-BH-A1EN-01	TCGA-BH-A1EN	II	Early
TCGA-BH-A18V-01	TCGA-BH-A18V	II	Early	TCGA-BH-A0GZ-01	TCGA-BH-A0GZ	II	Early	TCGA-BH-A1EO-01	TCGA-BH-A1EO	II	Early
TCGA-BH-A1EN-01	TCGA-BH-A1EN	II	Early	TCGA-BH-A0H9-01	TCGA-BH-A0H9	II	Early	TCGA-BH-A1ES-01	TCGA-BH-A1ES	II	Early
TCGA-BH-A1EO-01	TCGA-BH-A1EO	II	Early	TCGA-BH-A0HK-01	TCGA-BH-A0HK	II	Early	TCGA-BH-A1EW-01	TCGA-BH-A1EW	II	Early
TCGA-BH-A1ES-01	TCGA-BH-A1ES	II	Early	TCGA-BH-A0HL-01	TCGA-BH-A0HL	II	Early	TCGA-BH-A1EX-01	TCGA-BH-A1EX	II	Early
TCGA-BH-A1EW-01	TCGA-BH-A1EW	II	Early	TCGA-BH-A0HO-01	TCGA-BH-A0HO	II	Early	TCGA-BH-A1EY-01	TCGA-BH-A1EY	II	Early
TCGA-BH-A1EX-01	TCGA-BH-A1EX	II	Early	TCGA-BH-A0HQ-01	TCGA-BH-A0HQ	II	Early	TCGA-BH-A1F0-01	TCGA-BH-A1F0	II	Early
TCGA-BH-A1EY-01	TCGA-BH-A1EY	II	Early	TCGA-BH-A0HX-01	TCGA-BH-A0HX	II	Early	TCGA-BH-A1F5-01	TCGA-BH-A1F5	II	Early
TCGA-BH-A1F0-01	TCGA-BH-A1F0	II	Early	TCGA-BH-A0RX-01	TCGA-BH-A0RX	II	Early	TCGA-BH-A1FB-01	TCGA-BH-A1FB	II	Early
TCGA-BH-A1F5-01	TCGA-BH-A1F5	II	Early	TCGA-BH-A0W3-01	TCGA-BH-A0W3	II	Early	TCGA-BH-A1FC-01	TCGA-BH-A1FC	II	Early
TCGA-BH-A1FB-01	TCGA-BH-A1FB	II	Early	TCGA-BH-A0W4-01	TCGA-BH-A0W4	II	Early	TCGA-BH-A1FE-01	TCGA-BH-A1FE	II	Early
TCGA-BH-A1FC-01	TCGA-BH-A1FC	II	Early	TCGA-BH-A0W5-01	TCGA-BH-A0W5	II	Early	TCGA-BH-A1FL-01	TCGA-BH-A1FL	II	Early
TCGA-BH-A1FE-01	TCGA-BH-A1FE	II	Early	TCGA-BH-A18F-01	TCGA-BH-A18F	II	Early	TCGA-BH-A1FN-01	TCGA-BH-A1FN	II	Early
TCGA-BH-A1FL-01	TCGA-BH-A1FL	II	Early	TCGA-BH-A18I-01	TCGA-BH-A18I	II	Early	TCGA-BH-A202-01	TCGA-BH-A202	II	Early
TCGA-BH-A1FN-01	TCGA-BH-A1FN	II	Early	TCGA-BH-A18N-01	TCGA-BH-A18N	II	Early	TCGA-BH-A203-01	TCGA-BH-A203	II	Early
TCGA-BH-A202-01	TCGA-BH-A202	II	Early	TCGA-BH-A18Q-01	TCGA-BH-A18Q	II	Early	TCGA-BH-A204-01	TCGA-BH-A204	II	Early
TCGA-BH-A203-01	TCGA-BH-A203	II	Early	TCGA-BH-A18R-01	TCGA-BH-A18R	II	Early	TCGA-BH-A208-01	TCGA-BH-A208	II	Early
TCGA-BH-A204-01	TCGA-BH-A204	II	Early	TCGA-BH-A18T-01	TCGA-BH-A18T	II	Early	TCGA-BH-A28Q-01	TCGA-BH-A28Q	II	Early
TCGA-BH-A208-01	TCGA-BH-A208	II	Early	TCGA-BH-A18V-01	TCGA-BH-A18V	II	Early	TCGA-BH-A2L8-01	TCGA-BH-A2L8	II	Early
TCGA-BH-A28Q-01	TCGA-BH-A28Q	II	Early	TCGA-BH-A1EN-01	TCGA-BH-A1EN	II	Early	TCGA-BH-A42T-01	TCGA-BH-A42T	II	Early
TCGA-BH-A2L8-01	TCGA-BH-A2L8	II	Early	TCGA-BH-A1EO-01	TCGA-BH-A1EO	II	Early	TCGA-BH-A42U-01	TCGA-BH-A42U	II	Early
TCGA-BH-A42T-01	TCGA-BH-A42T	II	Early	TCGA-BH-A1ES-01	TCGA-BH-A1ES	II	Early	TCGA-BH-A5IZ-01	TCGA-BH-A5IZ	II	Early
TCGA-BH-A42U-01	TCGA-BH-A42U	II	Early	TCGA-BH-A1EW-01	TCGA-BH-A1EW	II	Early	TCGA-BH-A6R8-01	TCGA-BH-A6R8	II	Early
TCGA-BH-A5IZ-01	TCGA-BH-A5IZ	II	Early	TCGA-BH-A1EX-01	TCGA-BH-A1EX	II	Early	TCGA-BH-A6R9-01	TCGA-BH-A6R9	II	Early
TCGA-BH-A6R8-01	TCGA-BH-A6R8	II	Early	TCGA-BH-A1EY-01	TCGA-BH-A1EY	II	Early	TCGA-BH-A8G0-01	TCGA-BH-A8G0	II	Early
TCGA-BH-A6R9-01	TCGA-BH-A6R9	II	Early	TCGA-BH-A1F0-01	TCGA-BH-A1F0	II	Early	TCGA-C8-A12K-01	TCGA-C8-A12K	II	Early
TCGA-BH-A8G0-01	TCGA-BH-A8G0	II	Early	TCGA-BH-A1F5-01	TCGA-BH-A1F5	II	Early	TCGA-C8-A12L-01	TCGA-C8-A12L	II	Early
TCGA-C8-A12K-01	TCGA-C8-A12K	II	Early	TCGA-BH-A1FB-01	TCGA-BH-A1FB	II	Early	TCGA-C8-A12M-01	TCGA-C8-A12M	II	Early
TCGA-C8-A12L-01	TCGA-C8-A12L	II	Early	TCGA-BH-A1FC-01	TCGA-BH-A1FC	II	Early	TCGA-C8-A12N-01	TCGA-C8-A12N	II	Early
TCGA-C8-A12M-01	TCGA-C8-A12M	II	Early	TCGA-BH-A1FE-01	TCGA-BH-A1FE	II	Early	TCGA-C8-A12O-01	TCGA-C8-A12O	II	Early
TCGA-C8-A12N-01	TCGA-C8-A12N	II	Early	TCGA-BH-A1FL-01	TCGA-BH-A1FL	II	Early	TCGA-C8-A12P-01	TCGA-C8-A12P	II	Early
TCGA-C8-A12O-01	TCGA-C8-A12O	II	Early	TCGA-BH-A1FN-01	TCGA-BH-A1FN	II	Early	TCGA-C8-A12T-01	TCGA-C8-A12T	II	Early
TCGA-C8-A12P-01	TCGA-C8-A12P	II	Early	TCGA-BH-A202-01	TCGA-BH-A202	II	Early	TCGA-C8-A12U-01	TCGA-C8-A12U	II	Early
TCGA-C8-A12T-01	TCGA-C8-A12T	II	Early	TCGA-BH-A203-01	TCGA-BH-A203	II	Early	TCGA-C8-A12V-01	TCGA-C8-A12V	II	Early
TCGA-C8-A12U-01	TCGA-C8-A12U	II	Early	TCGA-BH-A204-01	TCGA-BH-A204	II	Early	TCGA-C8-A12X-01	TCGA-C8-A12X	II	Early
TCGA-C8-A12V-01	TCGA-C8-A12V	II	Early	TCGA-BH-A208-01	TCGA-BH-A208	II	Early	TCGA-C8-A12Y-01	TCGA-C8-A12Y	II	Early
TCGA-C8-A12X-01	TCGA-C8-A12X	II	Early	TCGA-BH-A28Q-01	TCGA-BH-A28Q	II	Early	TCGA-C8-A12Z-01	TCGA-C8-A12Z	II	Early
TCGA-C8-A12Y-01	TCGA-C8-A12Y	II	Early	TCGA-BH-A2L8-01	TCGA-BH-A2L8	II	Early	TCGA-C8-A132-01	TCGA-C8-A132	II	Early
TCGA-C8-A12Z-01	TCGA-C8-A12Z	II	Early	TCGA-BH-A42T-01	TCGA-BH-A42T	II	Early	TCGA-C8-A134-01	TCGA-C8-A134	II	Early
TCGA-C8-A132-01	TCGA-C8-A132	II	Early	TCGA-BH-A42U-01	TCGA-BH-A42U	II	Early	TCGA-C8-A135-01	TCGA-C8-A135	II	Early
TCGA-C8-A134-01	TCGA-C8-A134	II	Early	TCGA-BH-A5IZ-01	TCGA-BH-A5IZ	II	Early	TCGA-C8-A137-01	TCGA-C8-A137	II	Early
TCGA-C8-A135-01	TCGA-C8-A135	II	Early	TCGA-BH-A6R8-01	TCGA-BH-A6R8	II	Early	TCGA-C8-A1HE-01	TCGA-C8-A1HE	II	Early
TCGA-C8-A137-01	TCGA-C8-A137	II	Early	TCGA-BH-A6R9-01	TCGA-BH-A6R9	II	Early	TCGA-C8-A1HF-01	TCGA-C8-A1HF	II	Early
TCGA-C8-A1HE-01	TCGA-C8-A1HE	II	Early	TCGA-BH-A8G0-01	TCGA-BH-A8G0	II	Early	TCGA-C8-A1HG-01	TCGA-C8-A1HG	II	Early
TCGA-C8-A1HF-01	TCGA-C8-A1HF	II	Early	TCGA-C8-A12K-01	TCGA-C8-A12K	II	Early	TCGA-C8-A1HJ-01	TCGA-C8-A1HJ	II	Early
TCGA-C8-A1HG-01	TCGA-C8-A1HG	II	Early	TCGA-C8-A12L-01	TCGA-C8-A12L	II	Early	TCGA-C8-A1HK-01	TCGA-C8-A1HK	II	Early
TCGA-C8-A1HJ-01	TCGA-C8-A1HJ	II	Early	TCGA-C8-A12M-01	TCGA-C8-A12M	II	Early	TCGA-C8-A1HM-01	TCGA-C8-A1HM	II	Early
TCGA-C8-A1HK-01	TCGA-C8-A1HK	II	Early	TCGA-C8-A12N-01	TCGA-C8-A12N	II	Early	TCGA-C8-A1HN-01	TCGA-C8-A1HN	II	Early
TCGA-C8-A1HM-01	TCGA-C8-A1HM	II	Early	TCGA-C8-A12O-01	TCGA-C8-A12O	II	Early	TCGA-C8-A26W-01	TCGA-C8-A26W	II	Early
TCGA-C8-A1HN-01	TCGA-C8-A1HN	II	Early	TCGA-C8-A12P-01	TCGA-C8-A12P	II	Early	TCGA-C8-A26X-01	TCGA-C8-A26X	II	Early
TCGA-C8-A26W-01	TCGA-C8-A26W	II	Early	TCGA-C8-A12T-01	TCGA-C8-A12T	II	Early	TCGA-C8-A26Y-01	TCGA-C8-A26Y	II	Early
TCGA-C8-A26X-01	TCGA-C8-A26X	II	Early	TCGA-C8-A12U-01	TCGA-C8-A12U	II	Early	TCGA-C8-A26Z-01	TCGA-C8-A26Z	II	Early
TCGA-C8-A26Y-01	TCGA-C8-A26Y	II	Early	TCGA-C8-A12V-01	TCGA-C8-A12V	II	Early	TCGA-C8-A273-01	TCGA-C8-A273	II	Early
TCGA-C8-A26Z-01	TCGA-C8-A26Z	II	Early	TCGA-C8-A12X-01	TCGA-C8-A12X	II	Early	TCGA-C8-A274-01	TCGA-C8-A274	II	Early
TCGA-C8-A273-01	TCGA-C8-A273	II	Early	TCGA-C8-A12Y-01	TCGA-C8-A12Y	II	Early	TCGA-C8-A275-01	TCGA-C8-A275	II	Early
TCGA-C8-A274-01	TCGA-C8-A274	II	Early	TCGA-C8-A12Z-01	TCGA-C8-A12Z	II	Early	TCGA-C8-A27A-01	TCGA-C8-A27A	II	Early
TCGA-C8-A275-01	TCGA-C8-A275	II	Early	TCGA-C8-A132-01	TCGA-C8-A132	II	Early	TCGA-C8-A27B-01	TCGA-C8-A27B	II	Early
TCGA-C8-A27A-01	TCGA-C8-A27A	II	Early	TCGA-C8-A134-01	TCGA-C8-A134	II	Early	TCGA-C8-A8HQ-01	TCGA-C8-A8HQ	II	Early
TCGA-C8-A27B-01	TCGA-C8-A27B	II	Early	TCGA-C8-A135-01	TCGA-C8-A135	II	Early	TCGA-D8-A140-01	TCGA-D8-A140	II	Early
TCGA-C8-A8HQ-01	TCGA-C8-A8HQ	II	Early	TCGA-C8-A137-01	TCGA-C8-A137	II	Early	TCGA-D8-A142-01	TCGA-D8-A142	II	Early
TCGA-C8-A9FZ-01	TCGA-C8-A9FZ	II	Early	TCGA-C8-A1HE-01	TCGA-C8-A1HE	II	Early	TCGA-D8-A143-01	TCGA-D8-A143	II	Early
TCGA-D8-A140-01	TCGA-D8-A140	II	Early	TCGA-C8-A1HF-01	TCGA-C8-A1HF	II	Early	TCGA-D8-A145-01	TCGA-D8-A145	II	Early
TCGA-D8-A142-01	TCGA-D8-A142	II	Early	TCGA-C8-A1HG-01	TCGA-C8-A1HG	II	Early	TCGA-D8-A146-01	TCGA-D8-A146	II	Early
TCGA-D8-A143-01	TCGA-D8-A143	II	Early	TCGA-C8-A1HJ-01	TCGA-C8-A1HJ	II	Early	TCGA-D8-A1J8-01	TCGA-D8-A1J8	II	Early
TCGA-D8-A145-01	TCGA-D8-A145	II	Early	TCGA-C8-A1HK-01	TCGA-C8-A1HK	II	Early	TCGA-D8-A1JB-01	TCGA-D8-A1JB	II	Early
TCGA-D8-A146-01	TCGA-D8-A146	II	Early	TCGA-C8-A1HM-01	TCGA-C8-A1HM	II	Early	TCGA-D8-A1JD-01	TCGA-D8-A1JD	II	Early
TCGA-D8-A1J8-01	TCGA-D8-A1J8	II	Early	TCGA-C8-A1HN-01	TCGA-C8-A1HN	II	Early	TCGA-D8-A1JE-01	TCGA-D8-A1JE	II	Early
TCGA-D8-A1JB-01	TCGA-D8-A1JB	II	Early	TCGA-C8-A26W-01	TCGA-C8-A26W	II	Early	TCGA-D8-A1JG-01	TCGA-D8-A1JG	II	Early
TCGA-D8-A1JD-01	TCGA-D8-A1JD	II	Early	TCGA-C8-A26X-01	TCGA-C8-A26X	II	Early	TCGA-D8-A1JI-01	TCGA-D8-A1JI	II	Early
TCGA-D8-A1JE-01	TCGA-D8-A1JE	II	Early	TCGA-C8-A26Y-01	TCGA-C8-A26Y	II	Early	TCGA-D8-A1JJ-01	TCGA-D8-A1JJ	II	Early
TCGA-D8-A1JG-01	TCGA-D8-A1JG	II	Early	TCGA-C8-A26Z-01	TCGA-C8-A26Z	II	Early	TCGA-D8-A1JK-01	TCGA-D8-A1JK	II	Early
TCGA-D8-A1JI-01	TCGA-D8-A1JI	II	Early	TCGA-C8-A273-01	TCGA-C8-A273	II	Early	TCGA-D8-A1JL-01	TCGA-D8-A1JL	II	Early
TCGA-D8-A1JJ-01	TCGA-D8-A1JJ	II	Early	TCGA-C8-A274-01	TCGA-C8-A274	II	Early	TCGA-D8-A1JT-01	TCGA-D8-A1JT	II	Early
TCGA-D8-A1JK-01	TCGA-D8-A1JK	II	Early	TCGA-C8-A275-01	TCGA-C8-A275	II	Early	TCGA-D8-A1X7-01	TCGA-D8-A1X7	II	Early
TCGA-D8-A1JL-01	TCGA-D8-A1JL	II	Early	TCGA-C8-A27A-01	TCGA-C8-A27A	II	Early	TCGA-D8-A1X9-01	TCGA-D8-A1X9	II	Early
TCGA-D8-A1JT-01	TCGA-D8-A1JT	II	Early	TCGA-C8-A27B-01	TCGA-C8-A27B	II	Early	TCGA-D8-A1XB-01	TCGA-D8-A1XB	II	Early
TCGA-D8-A1X7-01	TCGA-D8-A1X7	II	Early	TCGA-C8-A8HQ-01	TCGA-C8-A8HQ	II	Early	TCGA-D8-A1XF-01	TCGA-D8-A1XF	II	Early
TCGA-D8-A1X9-01	TCGA-D8-A1X9	II	Early	TCGA-D8-A140-01	TCGA-D8-A140	II	Early	TCGA-D8-A1XK-01	TCGA-D8-A1XK	II	Early
TCGA-D8-A1XB-01	TCGA-D8-A1XB	II	Early	TCGA-D8-A142-01	TCGA-D8-A142	II	Early	TCGA-D8-A1XL-01	TCGA-D8-A1XL	II	Early
TCGA-D8-A1XF-01	TCGA-D8-A1XF	II	Early	TCGA-D8-A143-01	TCGA-D8-A143	II	Early	TCGA-D8-A1XO-01	TCGA-D8-A1XO	II	Early
TCGA-D8-A1XK-01	TCGA-D8-A1XK	II	Early	TCGA-D8-A145-01	TCGA-D8-A145	II	Early	TCGA-D8-A1XQ-01	TCGA-D8-A1XQ	II	Early
TCGA-D8-A1XL-01	TCGA-D8-A1XL	II	Early	TCGA-D8-A146-01	TCGA-D8-A146	II	Early	TCGA-D8-A1XR-01	TCGA-D8-A1XR	II	Early
TCGA-D8-A1XO-01	TCGA-D8-A1XO	II	Early	TCGA-D8-A1J8-01	TCGA-D8-A1J8	II	Early	TCGA-D8-A1XT-01	TCGA-D8-A1XT	II	Early
TCGA-D8-A1XQ-01	TCGA-D8-A1XQ	II	Early	TCGA-D8-A1JB-01	TCGA-D8-A1JB	II	Early	TCGA-D8-A1XV-01	TCGA-D8-A1XV	II	Early
TCGA-D8-A1XR-01	TCGA-D8-A1XR	II	Early	TCGA-D8-A1JD-01	TCGA-D8-A1JD	II	Early	TCGA-D8-A1XW-01	TCGA-D8-A1XW	II	Early
TCGA-D8-A1XT-01	TCGA-D8-A1XT	II	Early	TCGA-D8-A1JE-01	TCGA-D8-A1JE	II	Early	TCGA-D8-A1XY-01	TCGA-D8-A1XY	II	Early
TCGA-D8-A1XV-01	TCGA-D8-A1XV	II	Early	TCGA-D8-A1JG-01	TCGA-D8-A1JG	II	Early	TCGA-D8-A1Y2-01	TCGA-D8-A1Y2	II	Early
TCGA-D8-A1XW-01	TCGA-D8-A1XW	II	Early	TCGA-D8-A1JI-01	TCGA-D8-A1JI	II	Early	TCGA-D8-A27F-01	TCGA-D8-A27F	II	Early
TCGA-D8-A1XY-01	TCGA-D8-A1XY	II	Early	TCGA-D8-A1JJ-01	TCGA-D8-A1JJ	II	Early	TCGA-D8-A27G-01	TCGA-D8-A27G	II	Early
TCGA-D8-A1Y2-01	TCGA-D8-A1Y2	II	Early	TCGA-D8-A1JK-01	TCGA-D8-A1JK	II	Early	TCGA-D8-A27H-01	TCGA-D8-A27H	II	Early
TCGA-D8-A27F-01	TCGA-D8-A27F	II	Early	TCGA-D8-A1JL-01	TCGA-D8-A1JL	II	Early	TCGA-D8-A27K-01	TCGA-D8-A27K	II	Early
TCGA-D8-A27G-01	TCGA-D8-A27G	II	Early	TCGA-D8-A1JM-01	TCGA-D8-A1JM	II	Early	TCGA-D8-A27V-01	TCGA-D8-A27V	II	Early
TCGA-D8-A27H-01	TCGA-D8-A27H	II	Early	TCGA-D8-A1JT-01	TCGA-D8-A1JT	II	Early	TCGA-D8-A73U-01	TCGA-D8-A73U	II	Early
TCGA-D8-A27K-01	TCGA-D8-A27K	II	Early	TCGA-D8-A1X7-01	TCGA-D8-A1X7	II	Early	TCGA-D8-A73X-01	TCGA-D8-A73X	II	Early
TCGA-D8-A27V-01	TCGA-D8-A27V	II	Early	TCGA-D8-A1X9-01	TCGA-D8-A1X9	II	Early	TCGA-E2-A105-01	TCGA-E2-A105	II	Early
TCGA-D8-A73U-01	TCGA-D8-A73U	II	Early	TCGA-D8-A1XB-01	TCGA-D8-A1XB	II	Early	TCGA-E2-A109-01	TCGA-E2-A109	II	Early
TCGA-D8-A73X-01	TCGA-D8-A73X	II	Early	TCGA-D8-A1XF-01	TCGA-D8-A1XF	II	Early	TCGA-E2-A10A-01	TCGA-E2-A10A	II	Early
TCGA-E2-A105-01	TCGA-E2-A105	II	Early	TCGA-D8-A1XK-01	TCGA-D8-A1XK	II	Early	TCGA-E2-A10B-01	TCGA-E2-A10B	II	Early
TCGA-E2-A109-01	TCGA-E2-A109	II	Early	TCGA-D8-A1XL-01	TCGA-D8-A1XL	II	Early	TCGA-E2-A10C-01	TCGA-E2-A10C	II	Early
TCGA-E2-A10A-01	TCGA-E2-A10A	II	Early	TCGA-D8-A1XO-01	TCGA-D8-A1XO	II	Early	TCGA-E2-A10E-01	TCGA-E2-A10E	II	Early
TCGA-E2-A10B-01	TCGA-E2-A10B	II	Early	TCGA-D8-A1XQ-01	TCGA-D8-A1XQ	II	Early	TCGA-E2-A10F-01	TCGA-E2-A10F	II	Early
TCGA-E2-A10C-01	TCGA-E2-A10C	II	Early	TCGA-D8-A1XR-01	TCGA-D8-A1XR	II	Early	TCGA-E2-A14N-01	TCGA-E2-A14N	II	Early
TCGA-E2-A10E-01	TCGA-E2-A10E	II	Early	TCGA-D8-A1XT-01	TCGA-D8-A1XT	II	Early	TCGA-E2-A14Q-01	TCGA-E2-A14Q	II	Early
TCGA-E2-A10F-01	TCGA-E2-A10F	II	Early	TCGA-D8-A1XV-01	TCGA-D8-A1XV	II	Early	TCGA-E2-A14R-01	TCGA-E2-A14R	II	Early
TCGA-E2-A14N-01	TCGA-E2-A14N	II	Early	TCGA-D8-A1XW-01	TCGA-D8-A1XW	II	Early	TCGA-E2-A14T-01	TCGA-E2-A14T	II	Early
TCGA-E2-A14Q-01	TCGA-E2-A14Q	II	Early	TCGA-D8-A1XY-01	TCGA-D8-A1XY	II	Early	TCGA-E2-A14V-01	TCGA-E2-A14V	II	Early
TCGA-E2-A14R-01	TCGA-E2-A14R	II	Early	TCGA-D8-A1Y2-01	TCGA-D8-A1Y2	II	Early	TCGA-E2-A14W-01	TCGA-E2-A14W	II	Early
TCGA-E2-A14T-01	TCGA-E2-A14T	II	Early	TCGA-D8-A27F-01	TCGA-D8-A27F	II	Early	TCGA-E2-A14Y-01	TCGA-E2-A14Y	II	Early
TCGA-E2-A14V-01	TCGA-E2-A14V	II	Early	TCGA-D8-A27G-01	TCGA-D8-A27G	II	Early	TCGA-E2-A150-01	TCGA-E2-A150	II	Early
TCGA-E2-A14W-01	TCGA-E2-A14W	II	Early	TCGA-D8-A27H-01	TCGA-D8-A27H	II	Early	TCGA-E2-A153-01	TCGA-E2-A153	II	Early
TCGA-E2-A14Y-01	TCGA-E2-A14Y	II	Early	TCGA-D8-A27K-01	TCGA-D8-A27K	II	Early	TCGA-E2-A155-01	TCGA-E2-A155	II	Early
TCGA-E2-A150-01	TCGA-E2-A150	II	Early	TCGA-D8-A27V-01	TCGA-D8-A27V	II	Early	TCGA-E2-A158-01	TCGA-E2-A158	II	Early
TCGA-E2-A153-01	TCGA-E2-A153	II	Early	TCGA-D8-A73U-01	TCGA-D8-A73U	II	Early	TCGA-E2-A159-01	TCGA-E2-A159	II	Early
TCGA-E2-A155-01	TCGA-E2-A155	II	Early	TCGA-D8-A73X-01	TCGA-D8-A73X	II	Early	TCGA-E2-A15D-01	TCGA-E2-A15D	II	Early
TCGA-E2-A158-01	TCGA-E2-A158	II	Early	TCGA-E2-A105-01	TCGA-E2-A105	II	Early	TCGA-E2-A15E-01	TCGA-E2-A15E	II	Early
TCGA-E2-A159-01	TCGA-E2-A159	II	Early	TCGA-E2-A109-01	TCGA-E2-A109	II	Early	TCGA-E2-A15G-01	TCGA-E2-A15G	II	Early
TCGA-E2-A15D-01	TCGA-E2-A15D	II	Early	TCGA-E2-A10A-01	TCGA-E2-A10A	II	Early	TCGA-E2-A15H-01	TCGA-E2-A15H	II	Early
TCGA-E2-A15E-01	TCGA-E2-A15E	II	Early	TCGA-E2-A10B-01	TCGA-E2-A10B	II	Early	TCGA-E2-A15I-01	TCGA-E2-A15I	II	Early
TCGA-E2-A15G-01	TCGA-E2-A15G	II	Early	TCGA-E2-A10C-01	TCGA-E2-A10C	II	Early	TCGA-E2-A15K-01	TCGA-E2-A15K	II	Early
TCGA-E2-A15H-01	TCGA-E2-A15H	II	Early	TCGA-E2-A10E-01	TCGA-E2-A10E	II	Early	TCGA-E2-A15L-01	TCGA-E2-A15L	II	Early
TCGA-E2-A15I-01	TCGA-E2-A15I	II	Early	TCGA-E2-A10F-01	TCGA-E2-A10F	II	Early	TCGA-E2-A15M-01	TCGA-E2-A15M	II	Early
TCGA-E2-A15K-01	TCGA-E2-A15K	II	Early	TCGA-E2-A14N-01	TCGA-E2-A14N	II	Early	TCGA-E2-A15R-01	TCGA-E2-A15R	II	Early
TCGA-E2-A15L-01	TCGA-E2-A15L	II	Early	TCGA-E2-A14Q-01	TCGA-E2-A14Q	II	Early	TCGA-E2-A15S-01	TCGA-E2-A15S	II	Early
TCGA-E2-A15M-01	TCGA-E2-A15M	II	Early	TCGA-E2-A14R-01	TCGA-E2-A14R	II	Early	TCGA-E2-A15T-01	TCGA-E2-A15T	II	Early
TCGA-E2-A15R-01	TCGA-E2-A15R	II	Early	TCGA-E2-A14T-01	TCGA-E2-A14T	II	Early	TCGA-E2-A1AZ-01	TCGA-E2-A1AZ	II	Early
TCGA-E2-A15S-01	TCGA-E2-A15S	II	Early	TCGA-E2-A14V-01	TCGA-E2-A14V	II	Early	TCGA-E2-A1B1-01	TCGA-E2-A1B1	II	Early
TCGA-E2-A15T-01	TCGA-E2-A15T	II	Early	TCGA-E2-A14W-01	TCGA-E2-A14W	II	Early	TCGA-E2-A1B5-01	TCGA-E2-A1B5	II	Early
TCGA-E2-A1AZ-01	TCGA-E2-A1AZ	II	Early	TCGA-E2-A14Y-01	TCGA-E2-A14Y	II	Early	TCGA-E2-A1B6-01	TCGA-E2-A1B6	II	Early
TCGA-E2-A1B1-01	TCGA-E2-A1B1	II	Early	TCGA-E2-A150-01	TCGA-E2-A150	II	Early	TCGA-E2-A1BD-01	TCGA-E2-A1BD	II	Early
TCGA-E2-A1B5-01	TCGA-E2-A1B5	II	Early	TCGA-E2-A153-01	TCGA-E2-A153	II	Early	TCGA-E2-A1IE-01	TCGA-E2-A1IE	II	Early
TCGA-E2-A1B6-01	TCGA-E2-A1B6	II	Early	TCGA-E2-A155-01	TCGA-E2-A155	II	Early	TCGA-E2-A1IG-01	TCGA-E2-A1IG	II	Early
TCGA-E2-A1BD-01	TCGA-E2-A1BD	II	Early	TCGA-E2-A158-01	TCGA-E2-A158	II	Early	TCGA-E2-A1IK-01	TCGA-E2-A1IK	II	Early
TCGA-E2-A1IE-01	TCGA-E2-A1IE	II	Early	TCGA-E2-A159-01	TCGA-E2-A159	II	Early	TCGA-E2-A1IL-01	TCGA-E2-A1IL	II	Early
TCGA-E2-A1IG-01	TCGA-E2-A1IG	II	Early	TCGA-E2-A15D-01	TCGA-E2-A15D	II	Early	TCGA-E2-A1L6-01	TCGA-E2-A1L6	II	Early
TCGA-E2-A1IK-01	TCGA-E2-A1IK	II	Early	TCGA-E2-A15E-01	TCGA-E2-A15E	II	Early	TCGA-E2-A1L8-01	TCGA-E2-A1L8	II	Early
TCGA-E2-A1IL-01	TCGA-E2-A1IL	II	Early	TCGA-E2-A15G-01	TCGA-E2-A15G	II	Early	TCGA-E2-A1L9-01	TCGA-E2-A1L9	II	Early
TCGA-E2-A1L6-01	TCGA-E2-A1L6	II	Early	TCGA-E2-A15H-01	TCGA-E2-A15H	II	Early	TCGA-E2-A1LA-01	TCGA-E2-A1LA	II	Early
TCGA-E2-A1L8-01	TCGA-E2-A1L8	II	Early	TCGA-E2-A15I-01	TCGA-E2-A15I	II	Early	TCGA-E2-A1LB-01	TCGA-E2-A1LB	II	Early
TCGA-E2-A1L9-01	TCGA-E2-A1L9	II	Early	TCGA-E2-A15K-01	TCGA-E2-A15K	II	Early	TCGA-E2-A1LG-01	TCGA-E2-A1LG	II	Early
TCGA-E2-A1LA-01	TCGA-E2-A1LA	II	Early	TCGA-E2-A15L-01	TCGA-E2-A15L	II	Early	TCGA-E2-A1LI-01	TCGA-E2-A1LI	II	Early
TCGA-E2-A1LB-01	TCGA-E2-A1LB	II	Early	TCGA-E2-A15M-01	TCGA-E2-A15M	II	Early	TCGA-E2-A2P6-01	TCGA-E2-A2P6	II	Early
TCGA-E2-A1LG-01	TCGA-E2-A1LG	II	Early	TCGA-E2-A15R-01	TCGA-E2-A15R	II	Early	TCGA-E2-A56Z-01	TCGA-E2-A56Z	II	Early
TCGA-E2-A1LI-01	TCGA-E2-A1LI	II	Early	TCGA-E2-A15S-01	TCGA-E2-A15S	II	Early	TCGA-E2-A574-01	TCGA-E2-A574	II	Early
TCGA-E2-A2P6-01	TCGA-E2-A2P6	II	Early	TCGA-E2-A15T-01	TCGA-E2-A15T	II	Early	TCGA-E9-A1N5-01	TCGA-E9-A1N5	II	Early
TCGA-E2-A56Z-01	TCGA-E2-A56Z	II	Early	TCGA-E2-A1AZ-01	TCGA-E2-A1AZ	II	Early	TCGA-E9-A1N6-01	TCGA-E9-A1N6	II	Early
TCGA-E2-A574-01	TCGA-E2-A574	II	Early	TCGA-E2-A1B1-01	TCGA-E2-A1B1	II	Early	TCGA-E9-A1N8-01	TCGA-E9-A1N8	II	Early
TCGA-E9-A1N5-01	TCGA-E9-A1N5	II	Early	TCGA-E2-A1B5-01	TCGA-E2-A1B5	II	Early	TCGA-E9-A1N9-01	TCGA-E9-A1N9	II	Early
TCGA-E9-A1N6-01	TCGA-E9-A1N6	II	Early	TCGA-E2-A1B6-01	TCGA-E2-A1B6	II	Early	TCGA-E9-A1NA-01	TCGA-E9-A1NA	II	Early
TCGA-E9-A1N8-01	TCGA-E9-A1N8	II	Early	TCGA-E2-A1BD-01	TCGA-E2-A1BD	II	Early	TCGA-E9-A1ND-01	TCGA-E9-A1ND	II	Early
TCGA-E9-A1N9-01	TCGA-E9-A1N9	II	Early	TCGA-E2-A1IE-01	TCGA-E2-A1IE	II	Early	TCGA-E9-A1NE-01	TCGA-E9-A1NE	II	Early
TCGA-E9-A1NA-01	TCGA-E9-A1NA	II	Early	TCGA-E2-A1IG-01	TCGA-E2-A1IG	II	Early	TCGA-E9-A1NF-01	TCGA-E9-A1NF	II	Early
TCGA-E9-A1ND-01	TCGA-E9-A1ND	II	Early	TCGA-E2-A1IK-01	TCGA-E2-A1IK	II	Early	TCGA-E9-A1NG-01	TCGA-E9-A1NG	II	Early
TCGA-E9-A1NE-01	TCGA-E9-A1NE	II	Early	TCGA-E2-A1IL-01	TCGA-E2-A1IL	II	Early	TCGA-E9-A1NH-01	TCGA-E9-A1NH	II	Early
TCGA-E9-A1NF-01	TCGA-E9-A1NF	II	Early	TCGA-E2-A1L6-01	TCGA-E2-A1L6	II	Early	TCGA-E9-A1NI-01	TCGA-E9-A1NI	II	Early
TCGA-E9-A1NG-01	TCGA-E9-A1NG	II	Early	TCGA-E2-A1L8-01	TCGA-E2-A1L8	II	Early	TCGA-E9-A1QZ-01	TCGA-E9-A1QZ	II	Early
TCGA-E9-A1NH-01	TCGA-E9-A1NH	II	Early	TCGA-E2-A1L9-01	TCGA-E2-A1L9	II	Early	TCGA-E9-A1R0-01	TCGA-E9-A1R0	II	Early
TCGA-E9-A1NI-01	TCGA-E9-A1NI	II	Early	TCGA-E2-A1LA-01	TCGA-E2-A1LA	II	Early	TCGA-E9-A1R6-01	TCGA-E9-A1R6	II	Early
TCGA-E9-A1QZ-01	TCGA-E9-A1QZ	II	Early	TCGA-E2-A1LB-01	TCGA-E2-A1LB	II	Early	TCGA-E9-A1R7-01	TCGA-E9-A1R7	II	Early
TCGA-E9-A1R0-01	TCGA-E9-A1R0	II	Early	TCGA-E2-A1LG-01	TCGA-E2-A1LG	II	Early	TCGA-E9-A1RB-01	TCGA-E9-A1RB	II	Early
TCGA-E9-A1R6-01	TCGA-E9-A1R6	II	Early	TCGA-E2-A1LI-01	TCGA-E2-A1LI	II	Early	TCGA-E9-A1RD-01	TCGA-E9-A1RD	II	Early
TCGA-E9-A1R7-01	TCGA-E9-A1R7	II	Early	TCGA-E2-A2P6-01	TCGA-E2-A2P6	II	Early	TCGA-E9-A1RH-01	TCGA-E9-A1RH	II	Early
TCGA-E9-A1RB-01	TCGA-E9-A1RB	II	Early	TCGA-E2-A56Z-01	TCGA-E2-A56Z	II	Early	TCGA-E9-A227-01	TCGA-E9-A227	II	Early
TCGA-E9-A1RD-01	TCGA-E9-A1RD	II	Early	TCGA-E2-A574-01	TCGA-E2-A574	II	Early	TCGA-E9-A228-01	TCGA-E9-A228	II	Early
TCGA-E9-A1RH-01	TCGA-E9-A1RH	II	Early	TCGA-E9-A1N5-01	TCGA-E9-A1N5	II	Early	TCGA-E9-A22A-01	TCGA-E9-A22A	II	Early
TCGA-E9-A227-01	TCGA-E9-A227	II	Early	TCGA-E9-A1N6-01	TCGA-E9-A1N6	II	Early	TCGA-E9-A22D-01	TCGA-E9-A22D	II	Early
TCGA-E9-A228-01	TCGA-E9-A228	II	Early	TCGA-E9-A1N8-01	TCGA-E9-A1N8	II	Early	TCGA-E9-A22G-01	TCGA-E9-A22G	II	Early
TCGA-E9-A22A-01	TCGA-E9-A22A	II	Early	TCGA-E9-A1N9-01	TCGA-E9-A1N9	II	Early	TCGA-E9-A22H-01	TCGA-E9-A22H	II	Early
TCGA-E9-A22D-01	TCGA-E9-A22D	II	Early	TCGA-E9-A1NA-01	TCGA-E9-A1NA	II	Early	TCGA-E9-A243-01	TCGA-E9-A243	II	Early
TCGA-E9-A22G-01	TCGA-E9-A22G	II	Early	TCGA-E9-A1NC-01	TCGA-E9-A1NC	II	Early	TCGA-E9-A244-01	TCGA-E9-A244	II	Early
TCGA-E9-A22H-01	TCGA-E9-A22H	II	Early	TCGA-E9-A1ND-01	TCGA-E9-A1ND	II	Early	TCGA-E9-A245-01	TCGA-E9-A245	II	Early
TCGA-E9-A243-01	TCGA-E9-A243	II	Early	TCGA-E9-A1NE-01	TCGA-E9-A1NE	II	Early	TCGA-E9-A248-01	TCGA-E9-A248	II	Early
TCGA-E9-A244-01	TCGA-E9-A244	II	Early	TCGA-E9-A1NF-01	TCGA-E9-A1NF	II	Early	TCGA-E9-A249-01	TCGA-E9-A249	II	Early
TCGA-E9-A245-01	TCGA-E9-A245	II	Early	TCGA-E9-A1NG-01	TCGA-E9-A1NG	II	Early	TCGA-E9-A24A-01	TCGA-E9-A24A	II	Early
TCGA-E9-A248-01	TCGA-E9-A248	II	Early	TCGA-E9-A1NH-01	TCGA-E9-A1NH	II	Early	TCGA-E9-A295-01	TCGA-E9-A295	II	Early
TCGA-E9-A249-01	TCGA-E9-A249	II	Early	TCGA-E9-A1NI-01	TCGA-E9-A1NI	II	Early	TCGA-E9-A2JS-01	TCGA-E9-A2JS	II	Early
TCGA-E9-A24A-01	TCGA-E9-A24A	II	Early	TCGA-E9-A1QZ-01	TCGA-E9-A1QZ	II	Early	TCGA-E9-A2JT-01	TCGA-E9-A2JT	II	Early
TCGA-E9-A295-01	TCGA-E9-A295	II	Early	TCGA-E9-A1R0-01	TCGA-E9-A1R0	II	Early	TCGA-E9-A3QA-01	TCGA-E9-A3QA	II	Early
TCGA-E9-A2JS-01	TCGA-E9-A2JS	II	Early	TCGA-E9-A1R6-01	TCGA-E9-A1R6	II	Early	TCGA-E9-A3X8-01	TCGA-E9-A3X8	II	Early
TCGA-E9-A2JT-01	TCGA-E9-A2JT	II	Early	TCGA-E9-A1R7-01	TCGA-E9-A1R7	II	Early	TCGA-E9-A5FL-01	TCGA-E9-A5FL	II	Early
TCGA-E9-A3QA-01	TCGA-E9-A3QA	II	Early	TCGA-E9-A1RB-01	TCGA-E9-A1RB	II	Early	TCGA-E9-A5UO-01	TCGA-E9-A5UO	II	Early
TCGA-E9-A3X8-01	TCGA-E9-A3X8	II	Early	TCGA-E9-A1RD-01	TCGA-E9-A1RD	II	Early	TCGA-E9-A5UP-01	TCGA-E9-A5UP	II	Early
TCGA-E9-A5FL-01	TCGA-E9-A5FL	II	Early	TCGA-E9-A1RH-01	TCGA-E9-A1RH	II	Early	TCGA-EW-A1IW-01	TCGA-EW-A1IW	II	Early
TCGA-E9-A5UO-01	TCGA-E9-A5UO	II	Early	TCGA-E9-A227-01	TCGA-E9-A227	II	Early	TCGA-EW-A1IX-01	TCGA-EW-A1IX	II	Early
TCGA-E9-A5UP-01	TCGA-E9-A5UP	II	Early	TCGA-E9-A228-01	TCGA-E9-A228	II	Early	TCGA-EW-A1J1-01	TCGA-EW-A1J1	II	Early
TCGA-EW-A1IW-01	TCGA-EW-A1IW	II	Early	TCGA-E9-A22A-01	TCGA-E9-A22A	II	Early	TCGA-EW-A1J5-01	TCGA-EW-A1J5	II	Early
TCGA-EW-A1IX-01	TCGA-EW-A1IX	II	Early	TCGA-E9-A22D-01	TCGA-E9-A22D	II	Early	TCGA-EW-A1OV-01	TCGA-EW-A1OV	II	Early
TCGA-EW-A1J1-01	TCGA-EW-A1J1	II	Early	TCGA-E9-A22G-01	TCGA-E9-A22G	II	Early	TCGA-EW-A1OW-01	TCGA-EW-A1OW	II	Early
TCGA-EW-A1J5-01	TCGA-EW-A1J5	II	Early	TCGA-E9-A22H-01	TCGA-E9-A22H	II	Early	TCGA-EW-A1OX-01	TCGA-EW-A1OX	II	Early
TCGA-EW-A1OV-01	TCGA-EW-A1OV	II	Early	TCGA-E9-A243-01	TCGA-E9-A243	II	Early	TCGA-EW-A1OY-01	TCGA-EW-A1OY	II	Early
TCGA-EW-A1OW-01	TCGA-EW-A1OW	II	Early	TCGA-E9-A244-01	TCGA-E9-A244	II	Early	TCGA-EW-A1OZ-01	TCGA-EW-A1OZ	II	Early
TCGA-EW-A1OX-01	TCGA-EW-A1OX	II	Early	TCGA-E9-A245-01	TCGA-E9-A245	II	Early	TCGA-EW-A1P0-01	TCGA-EW-A1P0	II	Early
TCGA-EW-A1OY-01	TCGA-EW-A1OY	II	Early	TCGA-E9-A248-01	TCGA-E9-A248	II	Early	TCGA-EW-A1P3-01	TCGA-EW-A1P3	II	Early
TCGA-EW-A1OZ-01	TCGA-EW-A1OZ	II	Early	TCGA-E9-A249-01	TCGA-E9-A249	II	Early	TCGA-EW-A1P4-01	TCGA-EW-A1P4	II	Early
TCGA-EW-A1P0-01	TCGA-EW-A1P0	II	Early	TCGA-E9-A24A-01	TCGA-E9-A24A	II	Early	TCGA-EW-A1P5-01	TCGA-EW-A1P5	II	Early
TCGA-EW-A1P3-01	TCGA-EW-A1P3	II	Early	TCGA-E9-A295-01	TCGA-E9-A295	II	Early	TCGA-EW-A1P6-01	TCGA-EW-A1P6	II	Early
TCGA-EW-A1P4-01	TCGA-EW-A1P4	II	Early	TCGA-E9-A2JS-01	TCGA-E9-A2JS	II	Early	TCGA-EW-A1P7-01	TCGA-EW-A1P7	II	Early
TCGA-EW-A1P5-01	TCGA-EW-A1P5	II	Early	TCGA-E9-A2JT-01	TCGA-E9-A2JT	II	Early	TCGA-EW-A1PA-01	TCGA-EW-A1PA	II	Early
TCGA-EW-A1P6-01	TCGA-EW-A1P6	II	Early	TCGA-E9-A3HO-01	TCGA-E9-A3HO	II	Early	TCGA-EW-A1PC-01	TCGA-EW-A1PC	II	Early
TCGA-EW-A1P7-01	TCGA-EW-A1P7	II	Early	TCGA-E9-A3QA-01	TCGA-E9-A3QA	II	Early	TCGA-EW-A1PD-01	TCGA-EW-A1PD	II	Early
TCGA-EW-A1PA-01	TCGA-EW-A1PA	II	Early	TCGA-E9-A3X8-01	TCGA-E9-A3X8	II	Early	TCGA-EW-A1PE-01	TCGA-EW-A1PE	II	Early
TCGA-EW-A1PC-01	TCGA-EW-A1PC	II	Early	TCGA-E9-A5FL-01	TCGA-E9-A5FL	II	Early	TCGA-EW-A1PG-01	TCGA-EW-A1PG	II	Early
TCGA-EW-A1PD-01	TCGA-EW-A1PD	II	Early	TCGA-E9-A5UO-01	TCGA-E9-A5UO	II	Early	TCGA-EW-A1PH-01	TCGA-EW-A1PH	II	Early
TCGA-EW-A1PE-01	TCGA-EW-A1PE	II	Early	TCGA-E9-A5UP-01	TCGA-E9-A5UP	II	Early	TCGA-EW-A2FS-01	TCGA-EW-A2FS	II	Early
TCGA-EW-A1PG-01	TCGA-EW-A1PG	II	Early	TCGA-EW-A1IW-01	TCGA-EW-A1IW	II	Early	TCGA-EW-A2FW-01	TCGA-EW-A2FW	II	Early
TCGA-EW-A1PH-01	TCGA-EW-A1PH	II	Early	TCGA-EW-A1IX-01	TCGA-EW-A1IX	II	Early	TCGA-EW-A3E8-01	TCGA-EW-A3E8	II	Early
TCGA-EW-A2FS-01	TCGA-EW-A2FS	II	Early	TCGA-EW-A1J1-01	TCGA-EW-A1J1	II	Early	TCGA-EW-A423-01	TCGA-EW-A423	II	Early
TCGA-EW-A2FW-01	TCGA-EW-A2FW	II	Early	TCGA-EW-A1J5-01	TCGA-EW-A1J5	II	Early	TCGA-EW-A6S9-01	TCGA-EW-A6S9	II	Early
TCGA-EW-A3E8-01	TCGA-EW-A3E8	II	Early	TCGA-EW-A1OV-01	TCGA-EW-A1OV	II	Early	TCGA-EW-A6SA-01	TCGA-EW-A6SA	II	Early
TCGA-EW-A423-01	TCGA-EW-A423	II	Early	TCGA-EW-A1OW-01	TCGA-EW-A1OW	II	Early	TCGA-EW-A6SB-01	TCGA-EW-A6SB	II	Early
TCGA-EW-A6S9-01	TCGA-EW-A6S9	II	Early	TCGA-EW-A1OX-01	TCGA-EW-A1OX	II	Early	TCGA-EW-A6SC-01	TCGA-EW-A6SC	II	Early
TCGA-EW-A6SA-01	TCGA-EW-A6SA	II	Early	TCGA-EW-A1OY-01	TCGA-EW-A1OY	II	Early	TCGA-EW-A6SD-01	TCGA-EW-A6SD	II	Early
TCGA-EW-A6SB-01	TCGA-EW-A6SB	II	Early	TCGA-EW-A1OZ-01	TCGA-EW-A1OZ	II	Early	TCGA-GI-A2C9-01	TCGA-GI-A2C9	II	Early
TCGA-EW-A6SC-01	TCGA-EW-A6SC	II	Early	TCGA-EW-A1P0-01	TCGA-EW-A1P0	II	Early	TCGA-GM-A2DA-01	TCGA-GM-A2DA	II	Early
TCGA-EW-A6SD-01	TCGA-EW-A6SD	II	Early	TCGA-EW-A1P3-01	TCGA-EW-A1P3	II	Early	TCGA-GM-A2DB-01	TCGA-GM-A2DB	II	Early
TCGA-GI-A2C9-01	TCGA-GI-A2C9	II	Early	TCGA-EW-A1P4-01	TCGA-EW-A1P4	II	Early	TCGA-GM-A2DC-01	TCGA-GM-A2DC	II	Early
TCGA-GM-A2DA-01	TCGA-GM-A2DA	II	Early	TCGA-EW-A1P5-01	TCGA-EW-A1P5	II	Early	TCGA-GM-A2DF-01	TCGA-GM-A2DF	II	Early
TCGA-GM-A2DB-01	TCGA-GM-A2DB	II	Early	TCGA-EW-A1P6-01	TCGA-EW-A1P6	II	Early	TCGA-GM-A2DM-01	TCGA-GM-A2DM	II	Early
TCGA-GM-A2DC-01	TCGA-GM-A2DC	II	Early	TCGA-EW-A1P7-01	TCGA-EW-A1P7	II	Early	TCGA-GM-A2DN-01	TCGA-GM-A2DN	II	Early
TCGA-GM-A2DF-01	TCGA-GM-A2DF	II	Early	TCGA-EW-A1PA-01	TCGA-EW-A1PA	II	Early	TCGA-GM-A3NW-01	TCGA-GM-A3NW	II	Early
TCGA-GM-A2DM-01	TCGA-GM-A2DM	II	Early	TCGA-EW-A1PC-01	TCGA-EW-A1PC	II	Early	TCGA-GM-A3NY-01	TCGA-GM-A3NY	II	Early
TCGA-GM-A2DN-01	TCGA-GM-A2DN	II	Early	TCGA-EW-A1PD-01	TCGA-EW-A1PD	II	Early	TCGA-GM-A3XL-01	TCGA-GM-A3XL	II	Early
TCGA-GM-A3NW-01	TCGA-GM-A3NW	II	Early	TCGA-EW-A1PE-01	TCGA-EW-A1PE	II	Early	TCGA-GM-A5PV-01	TCGA-GM-A5PV	II	Early
TCGA-GM-A3NY-01	TCGA-GM-A3NY	II	Early	TCGA-EW-A1PG-01	TCGA-EW-A1PG	II	Early	TCGA-GM-A5PX-01	TCGA-GM-A5PX	II	Early
TCGA-GM-A3XL-01	TCGA-GM-A3XL	II	Early	TCGA-EW-A1PH-01	TCGA-EW-A1PH	II	Early	TCGA-HN-A2NL-01	TCGA-HN-A2NL	II	Early
TCGA-GM-A5PV-01	TCGA-GM-A5PV	II	Early	TCGA-EW-A2FS-01	TCGA-EW-A2FS	II	Early	TCGA-HN-A2OB-01	TCGA-HN-A2OB	II	Early
TCGA-GM-A5PX-01	TCGA-GM-A5PX	II	Early	TCGA-EW-A2FW-01	TCGA-EW-A2FW	II	Early	TCGA-JL-A3YW-01	TCGA-JL-A3YW	II	Early
TCGA-HN-A2NL-01	TCGA-HN-A2NL	II	Early	TCGA-EW-A3E8-01	TCGA-EW-A3E8	II	Early	TCGA-JL-A3YX-01	TCGA-JL-A3YX	II	Early
TCGA-HN-A2OB-01	TCGA-HN-A2OB	II	Early	TCGA-EW-A423-01	TCGA-EW-A423	II	Early	TCGA-LD-A66U-01	TCGA-LD-A66U	II	Early
TCGA-JL-A3YW-01	TCGA-JL-A3YW	II	Early	TCGA-EW-A6S9-01	TCGA-EW-A6S9	II	Early	TCGA-LD-A7W6-01	TCGA-LD-A7W6	II	Early
TCGA-JL-A3YX-01	TCGA-JL-A3YX	II	Early	TCGA-EW-A6SA-01	TCGA-EW-A6SA	II	Early	TCGA-LL-A442-01	TCGA-LL-A442	II	Early
TCGA-LD-A66U-01	TCGA-LD-A66U	II	Early	TCGA-EW-A6SB-01	TCGA-EW-A6SB	II	Early	TCGA-LL-A50Y-01	TCGA-LL-A50Y	II	Early
TCGA-LD-A7W6-01	TCGA-LD-A7W6	II	Early	TCGA-EW-A6SC-01	TCGA-EW-A6SC	II	Early	TCGA-LL-A5YL-01	TCGA-LL-A5YL	II	Early
TCGA-LL-A442-01	TCGA-LL-A442	II	Early	TCGA-EW-A6SD-01	TCGA-EW-A6SD	II	Early	TCGA-LL-A5YN-01	TCGA-LL-A5YN	II	Early
TCGA-LL-A50Y-01	TCGA-LL-A50Y	II	Early	TCGA-GI-A2C9-01	TCGA-GI-A2C9	II	Early	TCGA-LL-A5YP-01	TCGA-LL-A5YP	II	Early
TCGA-LL-A5YL-01	TCGA-LL-A5YL	II	Early	TCGA-GM-A2DA-01	TCGA-GM-A2DA	II	Early	TCGA-LL-A6FP-01	TCGA-LL-A6FP	II	Early
TCGA-LL-A5YN-01	TCGA-LL-A5YN	II	Early	TCGA-GM-A2DB-01	TCGA-GM-A2DB	II	Early	TCGA-LL-A6FR-01	TCGA-LL-A6FR	II	Early
TCGA-LL-A5YP-01	TCGA-LL-A5YP	II	Early	TCGA-GM-A2DC-01	TCGA-GM-A2DC	II	Early	TCGA-LL-A7SZ-01	TCGA-LL-A7SZ	II	Early
TCGA-LL-A6FP-01	TCGA-LL-A6FP	II	Early	TCGA-GM-A2DF-01	TCGA-GM-A2DF	II	Early	TCGA-LL-A7T0-01	TCGA-LL-A7T0	II	Early
TCGA-LL-A6FR-01	TCGA-LL-A6FR	II	Early	TCGA-GM-A2DM-01	TCGA-GM-A2DM	II	Early	TCGA-LL-A8F5-01	TCGA-LL-A8F5	II	Early
TCGA-LL-A7SZ-01	TCGA-LL-A7SZ	II	Early	TCGA-GM-A2DN-01	TCGA-GM-A2DN	II	Early	TCGA-MS-A51U-01	TCGA-MS-A51U	II	Early
TCGA-LL-A7T0-01	TCGA-LL-A7T0	II	Early	TCGA-GM-A3NW-01	TCGA-GM-A3NW	II	Early	TCGA-OK-A5Q2-01	TCGA-OK-A5Q2	II	Early
TCGA-LL-A8F5-01	TCGA-LL-A8F5	II	Early	TCGA-GM-A3NY-01	TCGA-GM-A3NY	II	Early	TCGA-OL-A5D6-01	TCGA-OL-A5D6	II	Early
TCGA-MS-A51U-01	TCGA-MS-A51U	II	Early	TCGA-GM-A3XL-01	TCGA-GM-A3XL	II	Early	TCGA-OL-A5D7-01	TCGA-OL-A5D7	II	Early
TCGA-OK-A5Q2-01	TCGA-OK-A5Q2	II	Early	TCGA-GM-A5PV-01	TCGA-GM-A5PV	II	Early	TCGA-OL-A5D8-01	TCGA-OL-A5D8	II	Early
TCGA-OL-A5D6-01	TCGA-OL-A5D6	II	Early	TCGA-GM-A5PX-01	TCGA-GM-A5PX	II	Early	TCGA-OL-A5DA-01	TCGA-OL-A5DA	II	Early
TCGA-OL-A5D7-01	TCGA-OL-A5D7	II	Early	TCGA-HN-A2NL-01	TCGA-HN-A2NL	II	Early	TCGA-OL-A5RU-01	TCGA-OL-A5RU	II	Early
TCGA-OL-A5D8-01	TCGA-OL-A5D8	II	Early	TCGA-HN-A2OB-01	TCGA-HN-A2OB	II	Early	TCGA-OL-A5RW-01	TCGA-OL-A5RW	II	Early
TCGA-OL-A5DA-01	TCGA-OL-A5DA	II	Early	TCGA-JL-A3YW-01	TCGA-JL-A3YW	II	Early	TCGA-OL-A5RY-01	TCGA-OL-A5RY	II	Early
TCGA-OL-A5RU-01	TCGA-OL-A5RU	II	Early	TCGA-JL-A3YX-01	TCGA-JL-A3YX	II	Early	TCGA-OL-A5S0-01	TCGA-OL-A5S0	II	Early
TCGA-OL-A5RW-01	TCGA-OL-A5RW	II	Early	TCGA-LD-A66U-01	TCGA-LD-A66U	II	Early	TCGA-OL-A66I-01	TCGA-OL-A66I	II	Early
TCGA-OL-A5RY-01	TCGA-OL-A5RY	II	Early	TCGA-LD-A7W6-01	TCGA-LD-A7W6	II	Early	TCGA-OL-A66K-01	TCGA-OL-A66K	II	Early
TCGA-OL-A5S0-01	TCGA-OL-A5S0	II	Early	TCGA-LL-A442-01	TCGA-LL-A442	II	Early	TCGA-OL-A66O-01	TCGA-OL-A66O	II	Early
TCGA-OL-A66I-01	TCGA-OL-A66I	II	Early	TCGA-LL-A50Y-01	TCGA-LL-A50Y	II	Early	TCGA-OL-A66P-01	TCGA-OL-A66P	II	Early
TCGA-OL-A66K-01	TCGA-OL-A66K	II	Early	TCGA-LL-A5YL-01	TCGA-LL-A5YL	II	Early	TCGA-OL-A6VQ-01	TCGA-OL-A6VQ	II	Early
TCGA-OL-A66O-01	TCGA-OL-A66O	II	Early	TCGA-LL-A5YN-01	TCGA-LL-A5YN	II	Early	TCGA-OL-A97C-01	TCGA-OL-A97C	II	Early
TCGA-OL-A66P-01	TCGA-OL-A66P	II	Early	TCGA-LL-A5YP-01	TCGA-LL-A5YP	II	Early	TCGA-PE-A5DD-01	TCGA-PE-A5DD	II	Early
TCGA-OL-A6VQ-01	TCGA-OL-A6VQ	II	Early	TCGA-LL-A6FP-01	TCGA-LL-A6FP	II	Early	TCGA-PE-A5DE-01	TCGA-PE-A5DE	II	Early
TCGA-OL-A97C-01	TCGA-OL-A97C	II	Early	TCGA-LL-A6FR-01	TCGA-LL-A6FR	II	Early	TCGA-PL-A8LY-01	TCGA-PL-A8LY	II	Early
TCGA-PE-A5DD-01	TCGA-PE-A5DD	II	Early	TCGA-LL-A7SZ-01	TCGA-LL-A7SZ	II	Early	TCGA-S3-A6ZF-01	TCGA-S3-A6ZF	II	Early
TCGA-PE-A5DE-01	TCGA-PE-A5DE	II	Early	TCGA-LL-A7T0-01	TCGA-LL-A7T0	II	Early	TCGA-S3-A6ZG-01	TCGA-S3-A6ZG	II	Early
TCGA-PL-A8LY-01	TCGA-PL-A8LY	II	Early	TCGA-LL-A8F5-01	TCGA-LL-A8F5	II	Early	TCGA-S3-AA0Z-01	TCGA-S3-AA0Z	II	Early
TCGA-S3-A6ZF-01	TCGA-S3-A6ZF	II	Early	TCGA-MS-A51U-01	TCGA-MS-A51U	II	Early	TCGA-S3-AA10-01	TCGA-S3-AA10	II	Early
TCGA-S3-A6ZG-01	TCGA-S3-A6ZG	II	Early	TCGA-OK-A5Q2-01	TCGA-OK-A5Q2	II	Early	TCGA-S3-AA11-01	TCGA-S3-A	II	Early
TCGA-S3-AA0Z-01	TCGA-S3-AA0Z	II	Early	TCGA-OL-A5D6-01	TCGA-OL-A5D6	II	Early	TCGA-S3-AA15-01	TCGA-S3-AA15	II	Early
TCGA-S3-AA10-01	TCGA-S3-AA10	II	Early	TCGA-OL-A5D7-01	TCGA-OL-A5D7	II	Early	TCGA-S3-AA17-01	TCGA-S3-AA17	II	Early
TCGA-S3-AA11-01	TCGA-S3-AA11	II	Early	TCGA-OL-A5D8-01	TCGA-OL-A5D8	II	Early	TCGA-UL-AAZ6-01	TCGA-UL-AAZ6	II	Early
TCGA-S3-AA15-01	TCGA-S3-AA15	II	Early	TCGA-OL-A5DA-01	TCGA-OL-A5DA	II	Early	TCGA-W8-A86G-01	TCGA-W8-A86G	II	Early
TCGA-S3-AA17-01	TCGA-S3-AA17	II	Early	TCGA-OL-A5RU-01	TCGA-OL-A5RU	II	Early	TCGA-WT-AB41-01	TCGA-WT-AB41	II	Early
TCGA-UL-AAZ6-01	TCGA-UL-AAZ6	II	Early	TCGA-OL-A5RW-01	TCGA-OL-A5RW	II	Early	TCGA-XX-A89A-01	TCGA-XX-A89A	II	Early
TCGA-W8-A86G-01	TCGA-W8-A86G	II	Early	TCGA-OL-A5RY-01	TCGA-OL-A5RY	II	Early	TCGA-4H-AAAK-01	TCGA-4H-AAAK	III	Advanced
TCGA-WT-AB41-01	TCGA-WT-AB41	II	Early	TCGA-OL-A5S0-01	TCGA-OL-A5S0	II	Early	TCGA-A1-A0SJ-01	TCGA-A1-A0SJ	III	Advanced
TCGA-XX-A89A-01	TCGA-XX-A89A	II	Early	TCGA-OL-A66I-01	TCGA-OL-A66I	II	Early	TCGA-A2-A04P-01	TCGA-A2-A04P	III	Advanced
TCGA-4H-AAAK-01	TCGA-4H-AAAK	III	Advanced	TCGA-OL-A66K-01	TCGA-OL-A66K	II	Early	TCGA-A2-A0CK-01	TCGA-A2-A0CK	III	Advanced
TCGA-A1-A0SJ-01	TCGA-A1-A0SJ	III	Advanced	TCGA-OL-A66O-01	TCGA-OL-A66O	II	Early	TCGA-A2-A0CL-01	TCGA-A2-A0CL	III	Advanced
TCGA-A2-A04P-01	TCGA-A2-A04P	III	Advanced	TCGA-OL-A66P-01	TCGA-OL-A66P	II	Early	TCGA-A2-A0ET-01	TCGA-A2-A0ET	III	Advanced
TCGA-A2-A0CK-01	TCGA-A2-A0CK	III	Advanced	TCGA-OL-A6VQ-01	TCGA-OL-A6VQ	II	Early	TCGA-A2-A0EW-01	TCGA-A2-A0EW	III	Advanced
TCGA-A2-A0CL-01	TCGA-A2-A0CL	III	Advanced	TCGA-OL-A97C-01	TCGA-OL-A97C	II	Early	TCGA-A2-A0SY-01	TCGA-A2-A0SY	III	Advanced
TCGA-A2-A0ET-01	TCGA-A2-A0ET	III	Advanced	TCGA-PE-A5DD-01	TCGA-PE-A5DD	II	Early	TCGA-A2-A0T1-01	TCGA-A2-A0T1	III	Advanced
TCGA-A2-A0EW-01	TCGA-A2-A0EW	III	Advanced	TCGA-PE-A5DE-01	TCGA-PE-A5DE	II	Early	TCGA-A2-A0YG-01	TCGA-A2-A0YG	III	Advanced
TCGA-A2-A0SY-01	TCGA-A2-A0SY	III	Advanced	TCGA-PL-A8LY-01	TCGA-PL-A8LY	II	Early	TCGA-A2-A0YH-01	TCGA-A2-A0YH	III	Advanced
TCGA-A2-A0T1-01	TCGA-A2-A0T1	III	Advanced	TCGA-S3-A6ZF-01	TCGA-S3-A6ZF	II	Early	TCGA-A2-A0YL-01	TCGA-A2-A0YL	III	Advanced
TCGA-A2-A0YG-01	TCGA-A2-A0YG	III	Advanced	TCGA-S3-A6ZG-01	TCGA-S3-A6ZG	II	Early	TCGA-A2-A0YT-01	TCGA-A2-A0YT	III	Advanced
TCGA-A2-A0YH-01	TCGA-A2-A0YH	III	Advanced	TCGA-S3-AA0Z-01	TCGA-S3-AA0Z	II	Early	TCGA-A2-A1FW-01	TCGA-A2-A1FW	III	Advanced
TCGA-A2-A0YL-01	TCGA-A2-A0YL	III	Advanced	TCGA-S3-AA10-01	TCGA-S3-AA10	II	Early	TCGA-A2-A1FX-01	TCGA-A2-A1FX	III	Advanced
TCGA-A2-A0YT-01	TCGA-A2-A0YT	III	Advanced	TCGA-S3-AA11-01	TCGA-S3-AA11	II	Early	TCGA-A2-A1G4-01	TCGA-A2-A1G4	III	Advanced
TCGA-A2-A1FW-01	TCGA-A2-A1FW	III	Advanced	TCGA-S3-AA15-01	TCGA-S3-AA15	II	Early	TCGA-A2-A1G6-01	TCGA-A2-A1G6	III	Advanced
TCGA-A2-A1FX-01	TCGA-A2-A1FX	III	Advanced	TCGA-S3-AA17-01	TCGA-S3-AA17	II	Early	TCGA-A2-A25D-01	TCGA-A2-A25D	III	Advanced
TCGA-A2-A1G4-01	TCGA-A2-A1G4	III	Advanced	TCGA-UL-AAZ6-01	TCGA-UL-AAZ6	II	Early	TCGA-A2-A25E-01	TCGA-A2-A25E	III	Advanced
TCGA-A2-A1G6-01	TCGA-A2-A1G6	III	Advanced	TCGA-W8-A86G-01	TCGA-W8-A86G	II	Early	TCGA-A2-A3KD-01	TCGA-A2-A3KD	III	Advanced
TCGA-A2-A25D-01	TCGA-A2-A25D	III	Advanced	TCGA-WT-AB41-01	TCGA-WT-AB41	II	Early	TCGA-A2-A3XS-01	TCGA-A2-A3XS	III	Advanced
TCGA-A2-A25E-01	TCGA-A2-A25E	III	Advanced	TCGA-XX-A89A-01	TCGA-XX-A89A	II	Early	TCGA-A2-A4RW-01	TCGA-A2-A4RW	III	Advanced
TCGA-A2-A3KD-01	TCGA-A2-A3KD	III	Advanced	TCGA-4H-AAAK-01	TCGA-4H-AAAK	III	Advanced	TCGA-A2-A4RY-01	TCGA-A2-A4RY	III	Advanced
TCGA-A2-A3XS-01	TCGA-A2-A3XS	III	Advanced	TCGA-A1-A0SJ-01	TCGA-A1-A0SJ	III	Advanced	TCGA-A2-A4S2-01	TCGA-A2-A4S2	III	Advanced
TCGA-A2-A4RW-01	TCGA-A2-A4RW	III	Advanced	TCGA-A2-A04P-01	TCGA-A2-A04P	III	Advanced	TCGA-A7-A13F-01	TCGA-A7-A13F	III	Advanced
TCGA-A2-A4RY-01	TCGA-A2-A4RY	III	Advanced	TCGA-A2-A0CK-01	TCGA-A2-A0CK	III	Advanced	TCGA-A7-A26E-01	TCGA-A7-A26E	III	Advanced
TCGA-A2-A4S2-01	TCGA-A2-A4S2	III	Advanced	TCGA-A2-A0CL-01	TCGA-A2-A0CL	III	Advanced	TCGA-A7-A2KD-01	TCGA-A7-A2KD	III	Advanced
TCGA-A7-A13F-01	TCGA-A7-A13F	III	Advanced	TCGA-A2-A0ET-01	TCGA-A2-A0ET	III	Advanced	TCGA-A7-A425-01	TCGA-A7-A425	III	Advanced
TCGA-A7-A26E-01	TCGA-A7-A26E	III	Advanced	TCGA-A2-A0EW-01	TCGA-A2-A0EW	III	Advanced	TCGA-A7-A426-01	TCGA-A7-A426	III	Advanced
TCGA-A7-A2KD-01	TCGA-A7-A2KD	III	Advanced	TCGA-A2-A0SY-01	TCGA-A2-A0SY	III	Advanced	TCGA-A7-A4SB-01	TCGA-A7-A4SB	III	Advanced
TCGA-A7-A425-01	TCGA-A7-A425	III	Advanced	TCGA-A2-A0T1-01	TCGA-A2-A0T1	III	Advanced	TCGA-A7-A5ZX-01	TCGA-A7-A5ZX	III	Advanced
TCGA-A7-A426-01	TCGA-A7-A426	III	Advanced	TCGA-A2-A0YG-01	TCGA-A2-A0YG	III	Advanced	TCGA-A8-A06N-01	TCGA-A8-A06N	III	Advanced
TCGA-A7-A4SB-01	TCGA-A7-A4SB	III	Advanced	TCGA-A2-A0YH-01	TCGA-A2-A0YH	III	Advanced	TCGA-A8-A06P-01	TCGA-A8-A06P	III	Advanced
TCGA-A7-A5ZX-01	TCGA-A7-A5ZX	III	Advanced	TCGA-A2-A0YJ-01	TCGA-A2-A0YJ	III	Advanced	TCGA-A8-A06Q-01	TCGA-A8-A06Q	III	Advanced
TCGA-A8-A06N-01	TCGA-A8-A06N	III	Advanced	TCGA-A2-A0YL-01	TCGA-A2-A0YL	III	Advanced	TCGA-A8-A06T-01	TCGA-A8-A06T	III	Advanced
TCGA-A8-A06P-01	TCGA-A8-A06P	III	Advanced	TCGA-A2-A0YT-01	TCGA-A2-A0YT	III	Advanced	TCGA-A8-A079-01	TCGA-A8-A079	III	Advanced
TCGA-A8-A06Q-01	TCGA-A8-A06Q	III	Advanced	TCGA-A2-A1FW-01	TCGA-A2-A1FW	III	Advanced	TCGA-A8-A07I-01	TCGA-A8-A07I	III	Advanced
TCGA-A8-A06T-01	TCGA-A8-A06T	III	Advanced	TCGA-A2-A1FX-01	TCGA-A2-A1FX	III	Advanced	TCGA-A8-A07L-01	TCGA-A8-A07L	III	Advanced
TCGA-A8-A079-01	TCGA-A8-A079	III	Advanced	TCGA-A2-A1G4-01	TCGA-A2-A1G4	III	Advanced	TCGA-A8-A07R-01	TCGA-A8-A07R	III	Advanced
TCGA-A8-A07I-01	TCGA-A8-A07I	III	Advanced	TCGA-A2-A1G6-01	TCGA-A2-A1G6	III	Advanced	TCGA-A8-A07U-01	TCGA-A8-A07U	III	Advanced
TCGA-A8-A07L-01	TCGA-A8-A07L	III	Advanced	TCGA-A2-A25D-01	TCGA-A2-A25D	III	Advanced	TCGA-A8-A08L-01	TCGA-A8-A08L	III	Advanced
TCGA-A8-A07R-01	TCGA-A8-A07R	III	Advanced	TCGA-A2-A25E-01	TCGA-A2-A25E	III	Advanced	TCGA-A8-A08X-01	TCGA-A8-A08X	III	Advanced
TCGA-A8-A07U-01	TCGA-A8-A07U	III	Advanced	TCGA-A2-A3KD-01	TCGA-A2-A3KD	III	Advanced	TCGA-A8-A092-01	TCGA-A8-A092	III	Advanced
TCGA-A8-A08L-01	TCGA-A8-A08L	III	Advanced	TCGA-A2-A3XS-01	TCGA-A2-A3XS	III	Advanced	TCGA-A8-A09B-01	TCGA-A8-A09B	III	Advanced
TCGA-A8-A08X-01	TCGA-A8-A08X	III	Advanced	TCGA-A2-A4RW-01	TCGA-A2-A4RW	III	Advanced	TCGA-A8-A09E-01	TCGA-A8-A09E	III	Advanced
TCGA-A8-A092-01	TCGA-A8-A092	III	Advanced	TCGA-A2-A4RY-01	TCGA-A2-A4RY	III	Advanced	TCGA-A8-A09G-01	TCGA-A8-A09G	III	Advanced
TCGA-A8-A09B-01	TCGA-A8-A09B	III	Advanced	TCGA-A2-A4S2-01	TCGA-A2-A4S2	III	Advanced	TCGA-A8-A09M-01	TCGA-A8-A09M	III	Advanced
TCGA-A8-A09E-01	TCGA-A8-A09E	III	Advanced	TCGA-A7-A13F-01	TCGA-A7-A13F	III	Advanced	TCGA-A8-A09N-01	TCGA-A8-A09N	III	Advanced
TCGA-A8-A09G-01	TCGA-A8-A09G	III	Advanced	TCGA-A7-A26E-01	TCGA-A7-A26E	III	Advanced	TCGA-A8-A09Q-01	TCGA-A8-A09Q	III	Advanced
TCGA-A8-A09M-01	TCGA-A8-A09M	III	Advanced	TCGA-A7-A2KD-01	TCGA-A7-A2KD	III	Advanced	TCGA-A8-A09X-01	TCGA-A8-A09X	III	Advanced
TCGA-A8-A09N-01	TCGA-A8-A09N	III	Advanced	TCGA-A7-A425-01	TCGA-A7-A425	III	Advanced	TCGA-A8-A0A6-01	TCGA-A8-A0A6	III	Advanced
TCGA-A8-A09Q-01	TCGA-A8-A09Q	III	Advanced	TCGA-A7-A426-01	TCGA-A7-A426	III	Advanced	TCGA-AC-A2BK-01	TCGA-AC-A2BK	III	Advanced
TCGA-A8-A09X-01	TCGA-A8-A09X	III	Advanced	TCGA-A7-A4SB-01	TCGA-A7-A4SB	III	Advanced	TCGA-AC-A2FE-01	TCGA-AC-A2FE	III	Advanced
TCGA-A8-A0A6-01	TCGA-A8-A0A6	III	Advanced	TCGA-A7-A5ZX-01	TCGA-A7-A5ZX	III	Advanced	TCGA-AC-A2FK-01	TCGA-AC-A2FK	III	Advanced
TCGA-AC-A2BK-01	TCGA-AC-A2BK	III	Advanced	TCGA-A8-A06N-01	TCGA-A8-A06N	III	Advanced	TCGA-AC-A2QI-01	TCGA-AC-A2QI	III	Advanced
TCGA-AC-A2FE-01	TCGA-AC-A2FE	III	Advanced	TCGA-A8-A06P-01	TCGA-A8-A06P	III	Advanced	TCGA-AC-A2QJ-01	TCGA-AC-A2QJ	III	Advanced
TCGA-AC-A2FK-01	TCGA-AC-A2FK	III	Advanced	TCGA-A8-A06Q-01	TCGA-A8-A06Q	III	Advanced	TCGA-AC-A3BB-01	TCGA-AC-A3BB	III	Advanced
TCGA-AC-A2QI-01	TCGA-AC-A2QI	III	Advanced	TCGA-A8-A06T-01	TCGA-A8-A06T	III	Advanced	TCGA-AC-A3EH-01	TCGA-AC-A3EH	III	Advanced
TCGA-AC-A2QJ-01	TCGA-AC-A2QJ	III	Advanced	TCGA-A8-A079-01	TCGA-A8-A079	III	Advanced	TCGA-AC-A3TM-01	TCGA-AC-A3TM	III	Advanced
TCGA-AC-A3BB-01	TCGA-AC-A3BB	III	Advanced	TCGA-A8-A07I-01	TCGA-A8-A07I	III	Advanced	TCGA-AC-A3W6-01	TCGA-AC-A3W6	III	Advanced
TCGA-AC-A3EH-01	TCGA-AC-A3EH	III	Advanced	TCGA-A8-A07L-01	TCGA-A8-A07L	III	Advanced	TCGA-AC-A3YI-01	TCGA-AC-A3YI	III	Advanced
TCGA-AC-A3TM-01	TCGA-AC-A3TM	III	Advanced	TCGA-A8-A07R-01	TCGA-A8-A07R	III	Advanced	TCGA-AC-A6IX-01	TCGA-AC-A6IX	III	Advanced
TCGA-AC-A3W6-01	TCGA-AC-A3W6	III	Advanced	TCGA-A8-A07U-01	TCGA-A8-A07U	III	Advanced	TCGA-AN-A04A-01	TCGA-AN-A04A	III	Advanced
TCGA-AC-A3YI-01	TCGA-AC-A3YI	III	Advanced	TCGA-A8-A08F-01	TCGA-A8-A08F	III	Advanced	TCGA-AN-A0AL-01	TCGA-AN-A0AL	III	Advanced
TCGA-AC-A6IX-01	TCGA-AC-A6IX	III	Advanced	TCGA-A8-A08L-01	TCGA-A8-A08L	III	Advanced	TCGA-AN-A0AS-01	TCGA-AN-A0AS	III	Advanced
TCGA-AN-A04A-01	TCGA-AN-A04A	III	Advanced	TCGA-A8-A08P-01	TCGA-A8-A08P	III	Advanced	TCGA-AN-A0FK-01	TCGA-AN-A0FK	III	Advanced
TCGA-AN-A0AL-01	TCGA-AN-A0AL	III	Advanced	TCGA-A8-A08X-01	TCGA-A8-A08X	III	Advanced	TCGA-AN-A0FW-01	TCGA-AN-A0FW	III	Advanced
TCGA-AN-A0AS-01	TCGA-AN-A0AS	III	Advanced	TCGA-A8-A092-01	TCGA-A8-A092	III	Advanced	TCGA-AN-A0FZ-01	TCGA-AN-A0FZ	III	Advanced
TCGA-AN-A0FK-01	TCGA-AN-A0FK	III	Advanced	TCGA-A8-A09B-01	TCGA-A8-A09B	III	Advanced	TCGA-AN-A0XN-01	TCGA-AN-A0XN	III	Advanced
TCGA-AN-A0FW-01	TCGA-AN-A0FW	III	Advanced	TCGA-A8-A09E-01	TCGA-A8-A09E	III	Advanced	TCGA-AN-A0XO-01	TCGA-AN-A0XO	III	Advanced
TCGA-AN-A0FZ-01	TCGA-AN-A0FZ	III	Advanced	TCGA-A8-A09G-01	TCGA-A8-A09G	III	Advanced	TCGA-AN-A0XP-01	TCGA-AN-A0XP	III	Advanced
TCGA-AN-A0XN-01	TCGA-AN-A0XN	III	Advanced	TCGA-A8-A09M-01	TCGA-A8-A09M	III	Advanced	TCGA-AN-A0XR-01	TCGA-AN-A0XR	III	Advanced
TCGA-AN-A0XO-01	TCGA-AN-A0XO	III	Advanced	TCGA-A8-A09N-01	TCGA-A8-A09N	III	Advanced	TCGA-AN-A0XS-01	TCGA-AN-A0XS	III	Advanced
TCGA-AN-A0XP-01	TCGA-AN-A0XP	III	Advanced	TCGA-A8-A09Q-01	TCGA-A8-A09Q	III	Advanced	TCGA-AN-A0XT-01	TCGA-AN-A0XT	III	Advanced
TCGA-AN-A0XR-01	TCGA-AN-A0XR	III	Advanced	TCGA-A8-A09W-01	TCGA-A8-A09W	III	Advanced	TCGA-AN-A0XV-01	TCGA-AN-A0XV	III	Advanced
TCGA-AN-A0XS-01	TCGA-AN-A0XS	III	Advanced	TCGA-A8-A09X-01	TCGA-A8-A09X	III	Advanced	TCGA-AN-A0XW-01	TCGA-AN-A0XW	III	Advanced
TCGA-AN-A0XT-01	TCGA-AN-A0XT	III	Advanced	TCGA-A8-A0A6-01	TCGA-A8-A0A6	III	Advanced	TCGA-AO-A03L-01	TCGA-AO-A03L	III	Advanced
TCGA-AN-A0XV-01	TCGA-AN-A0XV	III	Advanced	TCGA-AC-A2BK-01	TCGA-AC-A2BK	III	Advanced	TCGA-AO-A0J9-01	TCGA-AO-A0J9	III	Advanced
TCGA-AN-A0XW-01	TCGA-AN-A0XW	III	Advanced	TCGA-AC-A2FE-01	TCGA-AC-A2FE	III	Advanced	TCGA-AO-A0JA-01	TCGA-AO-A0JA	III	Advanced
TCGA-AO-A03L-01	TCGA-AO-A03L	III	Advanced	TCGA-AC-A2FK-01	TCGA-AC-A2FK	III	Advanced	TCGA-AO-A0JB-01	TCGA-AO-A0JB	III	Advanced
TCGA-AO-A0J9-01	TCGA-AO-A0J9	III	Advanced	TCGA-AC-A2QI-01	TCGA-AC-A2QI	III	Advanced	TCGA-AO-A0JD-01	TCGA-AO-A0JD	III	Advanced
TCGA-AO-A0JA-01	TCGA-AO-A0JA	III	Advanced	TCGA-AC-A2QJ-01	TCGA-AC-A2QJ	III	Advanced	TCGA-AO-A0JE-01	TCGA-AO-A0JE	III	Advanced
TCGA-AO-A0JB-01	TCGA-AO-A0JB	III	Advanced	TCGA-AC-A3BB-01	TCGA-AC-A3BB	III	Advanced	TCGA-AO-A0JG-01	TCGA-AO-A0JG	III	Advanced
TCGA-AO-A0JD-01	TCGA-AO-A0JD	III	Advanced	TCGA-AC-A3EH-01	TCGA-AC-A3EH	III	Advanced	TCGA-AO-A0JL-01	TCGA-AO-A0JL	III	Advanced
TCGA-AO-A0JE-01	TCGA-AO-A0JE	III	Advanced	TCGA-AC-A3TM-01	TCGA-AC-A3TM	III	Advanced	TCGA-AO-A1KQ-01	TCGA-AO-A1KQ	III	Advanced
TCGA-AO-A0JG-01	TCGA-AO-A0JG	III	Advanced	TCGA-AC-A3W6-01	TCGA-AC-A3W6	III	Advanced	TCGA-AQ-A04H-01	TCGA-AQ-A04H	III	Advanced
TCGA-AO-A0JL-01	TCGA-AO-A0JL	III	Advanced	TCGA-AC-A3YI-01	TCGA-AC-A3YI	III	Advanced	TCGA-AQ-A0Y5-01	TCGA-AQ-A0Y5	III	Advanced
TCGA-AO-A1KQ-01	TCGA-AO-A1KQ	III	Advanced	TCGA-AC-A6IX-01	TCGA-AC-A6IX	III	Advanced	TCGA-AQ-A1H2-01	TCGA-AQ-A1H2	III	Advanced
TCGA-AQ-A04H-01	TCGA-AQ-A04H	III	Advanced	TCGA-AN-A04A-01	TCGA-AN-A04A	III	Advanced	TCGA-AQ-A1H3-01	TCGA-AQ-A1H3	III	Advanced
TCGA-AQ-A0Y5-01	TCGA-AQ-A0Y5	III	Advanced	TCGA-AN-A0AL-01	TCGA-AN-A0AL	III	Advanced	TCGA-AQ-A7U7-01	TCGA-AQ-A7U7	III	Advanced
TCGA-AQ-A1H2-01	TCGA-AQ-A1H2	III	Advanced	TCGA-AN-A0AS-01	TCGA-AN-A0AS	III	Advanced	TCGA-AR-A0TQ-01	TCGA-AR-A0TQ	III	Advanced
TCGA-AQ-A1H3-01	TCGA-AQ-A1H3	III	Advanced	TCGA-AN-A0FK-01	TCGA-AN-A0FK	III	Advanced	TCGA-AR-A0TT-01	TCGA-AR-A0TT	III	Advanced
TCGA-AQ-A7U7-01	TCGA-AQ-A7U7	III	Advanced	TCGA-AN-A0FW-01	TCGA-AN-A0FW	III	Advanced	TCGA-AR-A0U2-01	TCGA-AR-A0U2	III	Advanced
TCGA-AR-A0TQ-01	TCGA-AR-A0TQ	III	Advanced	TCGA-AN-A0FZ-01	TCGA-AN-A0FZ	III	Advanced	TCGA-AR-A1AL-01	TCGA-AR-A1AL	III	Advanced
TCGA-AR-A0TT-01	TCGA-AR-A0TT	III	Advanced	TCGA-AN-A0XN-01	TCGA-AN-A0XN	III	Advanced	TCGA-AR-A1AM-01	TCGA-AR-A1AM	III	Advanced
TCGA-AR-A0U2-01	TCGA-AR-A0U2	III	Advanced	TCGA-AN-A0XO-01	TCGA-AN-A0XO	III	Advanced	TCGA-AR-A1AR-01	TCGA-AR-A1AR	III	Advanced
TCGA-AR-A1AL-01	TCGA-AR-A1AL	III	Advanced	TCGA-AN-A0XP-01	TCGA-AN-A0XP	III	Advanced	TCGA-AR-A1AU-01	TCGA-AR-A1AU	III	Advanced
TCGA-AR-A1AM-01	TCGA-AR-A1AM	III	Advanced	TCGA-AN-A0XR-01	TCGA-AN-A0XR	III	Advanced	TCGA-AR-A24M-01	TCGA-AR-A24M	III	Advanced
TCGA-AR-A1AR-01	TCGA-AR-A1AR	III	Advanced	TCGA-AN-A0XS-01	TCGA-AN-A0XS	III	Advanced	TCGA-AR-A24O-01	TCGA-AR-A24O	III	Advanced
TCGA-AR-A1AU-01	TCGA-AR-A1AU	III	Advanced	TCGA-AN-A0XT-01	TCGA-AN-A0XT	III	Advanced	TCGA-AR-A24R-01	TCGA-AR-A24R	III	Advanced
TCGA-AR-A24M-01	TCGA-AR-A24M	III	Advanced	TCGA-AN-A0XV-01	TCGA-AN-A0XV	III	Advanced	TCGA-AR-A24T-01	TCGA-AR-A24T	III	Advanced
TCGA-AR-A24O-01	TCGA-AR-A24O	III	Advanced	TCGA-AN-A0XW-01	TCGA-AN-A0XW	III	Advanced	TCGA-AR-A251-01	TCGA-AR-A251	III	Advanced
TCGA-AR-A24R-01	TCGA-AR-A24R	III	Advanced	TCGA-AO-A03L-01	TCGA-AO-A03L	III	Advanced	TCGA-AR-A254-01	TCGA-AR-A254	III	Advanced
TCGA-AR-A24T-01	TCGA-AR-A24T	III	Advanced	TCGA-AO-A0J9-01	TCGA-AO-A0J9	III	Advanced	TCGA-AR-A2LH-01	TCGA-AR-A2LH	III	Advanced
TCGA-AR-A251-01	TCGA-AR-A251	III	Advanced	TCGA-AO-A0JA-01	TCGA-AO-A0JA	III	Advanced	TCGA-AR-A2LJ-01	TCGA-AR-A2LJ	III	Advanced
TCGA-AR-A254-01	TCGA-AR-A254	III	Advanced	TCGA-AO-A0JB-01	TCGA-AO-A0JB	III	Advanced	TCGA-AR-A2LK-01	TCGA-AR-A2LK	III	Advanced
TCGA-AR-A2LH-01	TCGA-AR-A2LH	III	Advanced	TCGA-AO-A0JD-01	TCGA-AO-A0JD	III	Advanced	TCGA-AR-A5QN-01	TCGA-AR-A5QN	III	Advanced
TCGA-AR-A2LJ-01	TCGA-AR-A2LJ	III	Advanced	TCGA-AO-A0JE-01	TCGA-AO-A0JE	III	Advanced	TCGA-AR-A5QQ-01	TCGA-AR-A5QQ	III	Advanced
TCGA-AR-A2LK-01	TCGA-AR-A2LK	III	Advanced	TCGA-AO-A0JG-01	TCGA-AO-A0JG	III	Advanced	TCGA-B6-A0IE-01	TCGA-B6-A0IE	III	Advanced
TCGA-AR-A5QN-01	TCGA-AR-A5QN	III	Advanced	TCGA-AO-A0JL-01	TCGA-AO-A0JL	III	Advanced	TCGA-B6-A0IH-01	TCGA-B6-A0IH	III	Advanced
TCGA-AR-A5QQ-01	TCGA-AR-A5QQ	III	Advanced	TCGA-AO-A1KQ-01	TCGA-AO-A1KQ	III	Advanced	TCGA-B6-A0IK-01	TCGA-B6-A0IK	III	Advanced
TCGA-B6-A0IE-01	TCGA-B6-A0IE	III	Advanced	TCGA-AQ-A04H-01	TCGA-AQ-A04H	III	Advanced	TCGA-B6-A0IQ-01	TCGA-B6-A0IQ	III	Advanced
TCGA-B6-A0IH-01	TCGA-B6-A0IH	III	Advanced	TCGA-AQ-A0Y5-01	TCGA-AQ-A0Y5	III	Advanced	TCGA-B6-A0RI-01	TCGA-B6-A0RI	III	Advanced
TCGA-B6-A0IK-01	TCGA-B6-A0IK	III	Advanced	TCGA-AQ-A1H2-01	TCGA-AQ-A1H2	III	Advanced	TCGA-B6-A0RO-01	TCGA-B6-A0RO	III	Advanced
TCGA-B6-A0IQ-01	TCGA-B6-A0IQ	III	Advanced	TCGA-AQ-A1H3-01	TCGA-AQ-A1H3	III	Advanced	TCGA-B6-A0RT-01	TCGA-B6-A0RT	III	Advanced
TCGA-B6-A0RI-01	TCGA-B6-A0RI	III	Advanced	TCGA-AQ-A7U7-01	TCGA-AQ-A7U7	III	Advanced	TCGA-B6-A0RV-01	TCGA-B6-A0RV	III	Advanced
TCGA-B6-A0RO-01	TCGA-B6-A0RO	III	Advanced	TCGA-AR-A0TQ-01	TCGA-AR-A0TQ	III	Advanced	TCGA-B6-A0WX-01	TCGA-B6-A0WX	III	Advanced
TCGA-B6-A0RT-01	TCGA-B6-A0RT	III	Advanced	TCGA-AR-A0TT-01	TCGA-AR-A0TT	III	Advanced	TCGA-B6-A0WY-01	TCGA-B6-A0WY	III	Advanced
TCGA-B6-A0RV-01	TCGA-B6-A0RV	III	Advanced	TCGA-AR-A0TW-01	TCGA-AR-A0TW	III	Advanced	TCGA-B6-A1KN-01	TCGA-B6-A1KN	III	Advanced
TCGA-B6-A0WX-01	TCGA-B6-A0WX	III	Advanced	TCGA-AR-A0U2-01	TCGA-AR-A0U2	III	Advanced	TCGA-B6-A400-01	TCGA-B6-A400	III	Advanced
TCGA-B6-A0WY-01	TCGA-B6-A0WY	III	Advanced	TCGA-AR-A1AL-01	TCGA-AR-A1AL	III	Advanced	TCGA-B6-A408-01	TCGA-B6-A408	III	Advanced
TCGA-B6-A1KN-01	TCGA-B6-A1KN	III	Advanced	TCGA-AR-A1AM-01	TCGA-AR-A1AM	III	Advanced	TCGA-B6-A409-01	TCGA-B6-A409	III	Advanced
TCGA-B6-A400-01	TCGA-B6-A400	III	Advanced	TCGA-AR-A1AR-01	TCGA-AR-A1AR	III	Advanced	TCGA-BH-A0AZ-01	TCGA-BH-A0AZ	III	Advanced
TCGA-B6-A408-01	TCGA-B6-A408	III	Advanced	TCGA-AR-A1AU-01	TCGA-AR-A1AU	III	Advanced	TCGA-BH-A0B4-01	TCGA-BH-A0B4	III	Advanced
TCGA-B6-A409-01	TCGA-B6-A409	III	Advanced	TCGA-AR-A24M-01	TCGA-AR-A24M	III	Advanced	TCGA-BH-A0B5-01	TCGA-BH-A0B5	III	Advanced
TCGA-BH-A0AZ-01	TCGA-BH-A0AZ	III	Advanced	TCGA-AR-A24O-01	TCGA-AR-A24O	III	Advanced	TCGA-BH-A0BA-01	TCGA-BH-A0BA	III	Advanced
TCGA-BH-A0B4-01	TCGA-BH-A0B4	III	Advanced	TCGA-AR-A24R-01	TCGA-AR-A24R	III	Advanced	TCGA-BH-A0BC-01	TCGA-BH-A0BC	III	Advanced
TCGA-BH-A0B5-01	TCGA-BH-A0B5	III	Advanced	TCGA-AR-A24T-01	TCGA-AR-A24T	III	Advanced	TCGA-BH-A0BZ-01	TCGA-BH-A0BZ	III	Advanced
TCGA-BH-A0BA-01	TCGA-BH-A0BA	III	Advanced	TCGA-AR-A251-01	TCGA-AR-A251	III	Advanced	TCGA-BH-A0C1-01	TCGA-BH-A0C1	III	Advanced
TCGA-BH-A0BC-01	TCGA-BH-A0BC	III	Advanced	TCGA-AR-A254-01	TCGA-AR-A254	III	Advanced	TCGA-BH-A0DS-01	TCGA-BH-A0DS	III	Advanced
TCGA-BH-A0BS-01	TCGA-BH-A0BS	III	Advanced	TCGA-AR-A2LH-01	TCGA-AR-A2LH	III	Advanced	TCGA-BH-A0DV-01	TCGA-BH-A0DV	III	Advanced
TCGA-BH-A0BZ-01	TCGA-BH-A0BZ	III	Advanced	TCGA-AR-A2LJ-01	TCGA-AR-A2LJ	III	Advanced	TCGA-BH-A0E0-01	TCGA-BH-A0E0	III	Advanced
TCGA-BH-A0C1-01	TCGA-BH-A0C1	III	Advanced	TCGA-AR-A2LK-01	TCGA-AR-A2LK	III	Advanced	TCGA-BH-A0E2-01	TCGA-BH-A0E2	III	Advanced
TCGA-BH-A0DS-01	TCGA-BH-A0DS	III	Advanced	TCGA-AR-A5QN-01	TCGA-AR-A5QN	III	Advanced	TCGA-BH-A0H7-01	TCGA-BH-A0H7	III	Advanced
TCGA-BH-A0DV-01	TCGA-BH-A0DV	III	Advanced	TCGA-AR-A5QQ-01	TCGA-AR-A5QQ	III	Advanced	TCGA-BH-A0HP-01	TCGA-BH-A0HP	III	Advanced
TCGA-BH-A0E0-01	TCGA-BH-A0E0	III	Advanced	TCGA-B6-A0IE-01	TCGA-B6-A0IE	III	Advanced	TCGA-BH-A18L-01	TCGA-BH-A18L	III	Advanced
TCGA-BH-A0E2-01	TCGA-BH-A0E2	III	Advanced	TCGA-B6-A0IH-01	TCGA-B6-A0IH	III	Advanced	TCGA-BH-A18M-01	TCGA-BH-A18M	III	Advanced
TCGA-BH-A0H7-01	TCGA-BH-A0H7	III	Advanced	TCGA-B6-A0IK-01	TCGA-B6-A0IK	III	Advanced	TCGA-BH-A18U-01	TCGA-BH-A18U	III	Advanced
TCGA-BH-A0HP-01	TCGA-BH-A0HP	III	Advanced	TCGA-B6-A0IQ-01	TCGA-B6-A0IQ	III	Advanced	TCGA-BH-A1EV-01	TCGA-BH-A1EV	III	Advanced
TCGA-BH-A18L-01	TCGA-BH-A18L	III	Advanced	TCGA-B6-A0RI-01	TCGA-B6-A0RI	III	Advanced	TCGA-BH-A1F2-01	TCGA-BH-A1F2	III	Advanced
TCGA-BH-A18M-01	TCGA-BH-A18M	III	Advanced	TCGA-B6-A0RO-01	TCGA-B6-A0RO	III	Advanced	TCGA-BH-A1F8-01	TCGA-BH-A1F8	III	Advanced
TCGA-BH-A18U-01	TCGA-BH-A18U	III	Advanced	TCGA-B6-A0RT-01	TCGA-B6-A0RT	III	Advanced	TCGA-BH-A1FJ-01	TCGA-BH-A1FJ	III	Advanced
TCGA-BH-A1EV-01	TCGA-BH-A1EV	III	Advanced	TCGA-B6-A0RV-01	TCGA-B6-A0RV	III	Advanced	TCGA-BH-A1FM-01	TCGA-BH-A1FM	III	Advanced
TCGA-BH-A1F2-01	TCGA-BH-A1F2	III	Advanced	TCGA-B6-A0WX-01	TCGA-B6-A0WX	III	Advanced	TCGA-BH-A1FR-01	TCGA-BH-A1FR	III	Advanced
TCGA-BH-A1F8-01	TCGA-BH-A1F8	III	Advanced	TCGA-B6-A0WY-01	TCGA-B6-A0WY	III	Advanced	TCGA-BH-A28O-01	TCGA-BH-A28O	III	Advanced
TCGA-BH-A1FJ-01	TCGA-BH-A1FJ	III	Advanced	TCGA-B6-A1KN-01	TCGA-B6-A1KN	III	Advanced	TCGA-BH-AB28-01	TCGA-BH-AB28	III	Advanced
TCGA-BH-A1FM-01	TCGA-BH-A1FM	III	Advanced	TCGA-B6-A400-01	TCGA-B6-A400	III	Advanced	TCGA-C8-A12Q-01	TCGA-C8-A12Q	III	Advanced
TCGA-BH-A1FR-01	TCGA-BH-A1FR	III	Advanced	TCGA-B6-A408-01	TCGA-B6-A408	III	Advanced	TCGA-C8-A12W-01	TCGA-C8-A12W	III	Advanced
TCGA-BH-A28O-01	TCGA-BH-A28O	III	Advanced	TCGA-B6-A409-01	TCGA-B6-A409	III	Advanced	TCGA-C8-A130-01	TCGA-C8-A130	III	Advanced
TCGA-BH-AB28-01	TCGA-BH-AB28	III	Advanced	TCGA-BH-A0AZ-01	TCGA-BH-A0AZ	III	Advanced	TCGA-C8-A131-01	TCGA-C8-A131	III	Advanced
TCGA-C8-A12Q-01	TCGA-C8-A12Q	III	Advanced	TCGA-BH-A0B4-01	TCGA-BH-A0B4	III	Advanced	TCGA-C8-A133-01	TCGA-C8-A133	III	Advanced
TCGA-C8-A12W-01	TCGA-C8-A12W	III	Advanced	TCGA-BH-A0B5-01	TCGA-BH-A0B5	III	Advanced	TCGA-C8-A138-01	TCGA-C8-A138	III	Advanced
TCGA-C8-A130-01	TCGA-C8-A130	III	Advanced	TCGA-BH-A0BA-01	TCGA-BH-A0BA	III	Advanced	TCGA-C8-A1HI-01	TCGA-C8-A1HI	III	Advanced
TCGA-C8-A131-01	TCGA-C8-A131	III	Advanced	TCGA-BH-A0BC-01	TCGA-BH-A0BC	III	Advanced	TCGA-C8-A1HL-01	TCGA-C8-A1HL	III	Advanced
TCGA-C8-A133-01	TCGA-C8-A133	III	Advanced	TCGA-BH-A0BZ-01	TCGA-BH-A0BZ	III	Advanced	TCGA-C8-A1HO-01	TCGA-C8-A1HO	III	Advanced
TCGA-C8-A138-01	TCGA-C8-A138	III	Advanced	TCGA-BH-A0C1-01	TCGA-BH-A0C1	III	Advanced	TCGA-C8-A26V-01	TCGA-C8-A26V	III	Advanced
TCGA-C8-A1HI-01	TCGA-C8-A1HI	III	Advanced	TCGA-BH-A0DS-01	TCGA-BH-A0DS	III	Advanced	TCGA-C8-A278-01	TCGA-C8-A278	III	Advanced
TCGA-C8-A1HL-01	TCGA-C8-A1HL	III	Advanced	TCGA-BH-A0DV-01	TCGA-BH-A0DV	III	Advanced	TCGA-C8-A3M7-01	TCGA-C8-A3M7	III	Advanced
TCGA-C8-A1HO-01	TCGA-C8-A1HO	III	Advanced	TCGA-BH-A0E0-01	TCGA-BH-A0E0	III	Advanced	TCGA-C8-A8HP-01	TCGA-C8-A8HP	III	Advanced
TCGA-C8-A26V-01	TCGA-C8-A26V	III	Advanced	TCGA-BH-A0E2-01	TCGA-BH-A0E2	III	Advanced	TCGA-C8-A8HR-01	TCGA-C8-A8HR	III	Advanced
TCGA-C8-A278-01	TCGA-C8-A278	III	Advanced	TCGA-BH-A0H7-01	TCGA-BH-A0H7	III	Advanced	TCGA-D8-A1JC-01	TCGA-D8-A1JC	III	Advanced
TCGA-C8-A3M7-01	TCGA-C8-A3M7	III	Advanced	TCGA-BH-A0HP-01	TCGA-BH-A0HP	III	Advanced	TCGA-D8-A1JF-01	TCGA-D8-A1JF	III	Advanced
TCGA-C8-A8HP-01	TCGA-C8-A8HP	III	Advanced	TCGA-BH-A18L-01	TCGA-BH-A18L	III	Advanced	TCGA-D8-A1JN-01	TCGA-D8-A1JN	III	Advanced
TCGA-C8-A8HR-01	TCGA-C8-A8HR	III	Advanced	TCGA-BH-A18M-01	TCGA-BH-A18M	III	Advanced	TCGA-D8-A1X5-01	TCGA-D8-A1X5	III	Advanced
TCGA-D8-A1JC-01	TCGA-D8-A1JC	III	Advanced	TCGA-BH-A18U-01	TCGA-BH-A18U	III	Advanced	TCGA-D8-A1X6-01	TCGA-D8-A1X6	III	Advanced
TCGA-D8-A1JF-01	TCGA-D8-A1JF	III	Advanced	TCGA-BH-A1EV-01	TCGA-BH-A1EV	III	Advanced	TCGA-D8-A1X8-01	TCGA-D8-A1X8	III	Advanced
TCGA-D8-A1JN-01	TCGA-D8-A1JN	III	Advanced	TCGA-BH-A1F2-01	TCGA-BH-A1F2	III	Advanced	TCGA-D8-A1XC-01	TCGA-D8-A1XC	III	Advanced
TCGA-D8-A1X5-01	TCGA-D8-A1X5	III	Advanced	TCGA-BH-A1F8-01	TCGA-BH-A1F8	III	Advanced	TCGA-D8-A1XD-01	TCGA-D8-A1XD	III	Advanced
TCGA-D8-A1X6-01	TCGA-D8-A1X6	III	Advanced	TCGA-BH-A1FJ-01	TCGA-BH-A1FJ	III	Advanced	TCGA-D8-A1XG-01	TCGA-D8-A1XG	III	Advanced
TCGA-D8-A1X8-01	TCGA-D8-A1X8	III	Advanced	TCGA-BH-A1FM-01	TCGA-BH-A1FM	III	Advanced	TCGA-D8-A1XJ-01	TCGA-D8-A1XJ	III	Advanced
TCGA-D8-A1XC-01	TCGA-D8-A1XC	III	Advanced	TCGA-BH-A1FR-01	TCGA-BH-A1FR	III	Advanced	TCGA-D8-A1XS-01	TCGA-D8-A1XS	III	Advanced
TCGA-D8-A1XD-01	TCGA-D8-A1XD	III	Advanced	TCGA-BH-A28O-01	TCGA-BH-A28O	III	Advanced	TCGA-D8-A1XZ-01	TCGA-D8-A1XZ	III	Advanced
TCGA-D8-A1XG-01	TCGA-D8-A1XG	III	Advanced	TCGA-BH-AB28-01	TCGA-BH-AB28	III	Advanced	TCGA-D8-A1Y0-01	TCGA-D8-A1Y0	III	Advanced
TCGA-D8-A1XJ-01	TCGA-D8-A1XJ	III	Advanced	TCGA-C8-A12Q-01	TCGA-C8-A12Q	III	Advanced	TCGA-D8-A1Y1-01	TCGA-D8-A1Y1	III	Advanced
TCGA-D8-A1XS-01	TCGA-D8-A1XS	III	Advanced	TCGA-C8-A12W-01	TCGA-C8-A12W	III	Advanced	TCGA-D8-A1Y3-01	TCGA-D8-A1Y3	III	Advanced
TCGA-D8-A1XZ-01	TCGA-D8-A1XZ	III	Advanced	TCGA-C8-A130-01	TCGA-C8-A130	III	Advanced	TCGA-D8-A27I-01	TCGA-D8-A27I	III	Advanced
TCGA-D8-A1Y0-01	TCGA-D8-A1Y0	III	Advanced	TCGA-C8-A131-01	TCGA-C8-A131	III	Advanced	TCGA-D8-A27L-01	TCGA-D8-A27L	III	Advanced
TCGA-D8-A1Y1-01	TCGA-D8-A1Y1	III	Advanced	TCGA-C8-A133-01	TCGA-C8-A133	III	Advanced	TCGA-D8-A27N-01	TCGA-D8-A27N	III	Advanced
TCGA-D8-A1Y3-01	TCGA-D8-A1Y3	III	Advanced	TCGA-C8-A138-01	TCGA-C8-A138	III	Advanced	TCGA-D8-A27R-01	TCGA-D8-A27R	III	Advanced
TCGA-D8-A27I-01	TCGA-D8-A27I	III	Advanced	TCGA-C8-A1HI-01	TCGA-C8-A1HI	III	Advanced	TCGA-D8-A27T-01	TCGA-D8-A27T	III	Advanced
TCGA-D8-A27L-01	TCGA-D8-A27L	III	Advanced	TCGA-C8-A1HL-01	TCGA-C8-A1HL	III	Advanced	TCGA-D8-A27W-01	TCGA-D8-A27W	III	Advanced
TCGA-D8-A27N-01	TCGA-D8-A27N	III	Advanced	TCGA-C8-A1HO-01	TCGA-C8-A1HO	III	Advanced	TCGA-D8-A3Z5-01	TCGA-D8-A3Z5	III	Advanced
TCGA-D8-A27R-01	TCGA-D8-A27R	III	Advanced	TCGA-C8-A26V-01	TCGA-C8-A26V	III	Advanced	TCGA-D8-A3Z6-01	TCGA-D8-A3Z6	III	Advanced
TCGA-D8-A27T-01	TCGA-D8-A27T	III	Advanced	TCGA-C8-A278-01	TCGA-C8-A278	III	Advanced	TCGA-D8-A73W-01	TCGA-D8-A73W	III	Advanced
TCGA-D8-A27W-01	TCGA-D8-A27W	III	Advanced	TCGA-C8-A3M7-01	TCGA-C8-A3M7	III	Advanced	TCGA-E2-A107-01	TCGA-E2-A107	III	Advanced
TCGA-D8-A3Z5-01	TCGA-D8-A3Z5	III	Advanced	TCGA-C8-A8HP-01	TCGA-C8-A8HP	III	Advanced	TCGA-E2-A108-01	TCGA-E2-A108	III	Advanced
TCGA-D8-A3Z6-01	TCGA-D8-A3Z6	III	Advanced	TCGA-C8-A8HR-01	TCGA-C8-A8HR	III	Advanced	TCGA-E2-A14O-01	TCGA-E2-A14O	III	Advanced
TCGA-D8-A73W-01	TCGA-D8-A73W	III	Advanced	TCGA-D8-A1JC-01	TCGA-D8-A1JC	III	Advanced	TCGA-E2-A14P-01	TCGA-E2-A14P	III	Advanced
TCGA-E2-A107-01	TCGA-E2-A107	III	Advanced	TCGA-D8-A1JF-01	TCGA-D8-A1JF	III	Advanced	TCGA-E2-A14X-01	TCGA-E2-A14X	III	Advanced
TCGA-E2-A108-01	TCGA-E2-A108	III	Advanced	TCGA-D8-A1JN-01	TCGA-D8-A1JN	III	Advanced	TCGA-E2-A15A-01	TCGA-E2-A15A	III	Advanced
TCGA-E2-A14O-01	TCGA-E2-A14O	III	Advanced	TCGA-D8-A1X5-01	TCGA-D8-A1X5	III	Advanced	TCGA-E2-A1B0-01	TCGA-E2-A1B0	III	Advanced
TCGA-E2-A14P-01	TCGA-E2-A14P	III	Advanced	TCGA-D8-A1X6-01	TCGA-D8-A1X6	III	Advanced	TCGA-E2-A1B4-01	TCGA-E2-A1B4	III	Advanced
TCGA-E2-A14X-01	TCGA-E2-A14X	III	Advanced	TCGA-D8-A1X8-01	TCGA-D8-A1X8	III	Advanced	TCGA-E2-A1L7-01	TCGA-E2-A1L7	III	Advanced
TCGA-E2-A15A-01	TCGA-E2-A15A	III	Advanced	TCGA-D8-A1XC-01	TCGA-D8-A1XC	III	Advanced	TCGA-E2-A1LE-01	TCGA-E2-A1LE	III	Advanced
TCGA-E2-A1B0-01	TCGA-E2-A1B0	III	Advanced	TCGA-D8-A1XD-01	TCGA-D8-A1XD	III	Advanced	TCGA-E2-A1LK-01	TCGA-E2-A1LK	III	Advanced
TCGA-E2-A1B4-01	TCGA-E2-A1B4	III	Advanced	TCGA-D8-A1XG-01	TCGA-D8-A1XG	III	Advanced	TCGA-E2-A1LL-01	TCGA-E2-A1LL	III	Advanced
TCGA-E2-A1L7-01	TCGA-E2-A1L7	III	Advanced	TCGA-D8-A1XJ-01	TCGA-D8-A1XJ	III	Advanced	TCGA-E2-A2P5-01	TCGA-E2-A2P5	III	Advanced
TCGA-E2-A1LE-01	TCGA-E2-A1LE	III	Advanced	TCGA-D8-A1XS-01	TCGA-D8-A1XS	III	Advanced	TCGA-E2-A3DX-01	TCGA-E2-A3DX	III	Advanced
TCGA-E2-A1LK-01	TCGA-E2-A1LK	III	Advanced	TCGA-D8-A1XZ-01	TCGA-D8-A1XZ	III	Advanced	TCGA-E2-A572-01	TCGA-E2-A572	III	Advanced
TCGA-E2-A1LL-01	TCGA-E2-A1LL	III	Advanced	TCGA-D8-A1Y0-01	TCGA-D8-A1Y0	III	Advanced	TCGA-E2-A9RU-01	TCGA-E2-A9RU	III	Advanced
TCGA-E2-A2P5-01	TCGA-E2-A2P5	III	Advanced	TCGA-D8-A1Y1-01	TCGA-D8-A1Y1	III	Advanced	TCGA-E9-A1N3-01	TCGA-E9-A1N3	III	Advanced
TCGA-E2-A3DX-01	TCGA-E2-A3DX	III	Advanced	TCGA-D8-A1Y3-01	TCGA-D8-A1Y3	III	Advanced	TCGA-E9-A1N4-01	TCGA-E9-A1N4	III	Advanced
TCGA-E2-A572-01	TCGA-E2-A572	III	Advanced	TCGA-D8-A27I-01	TCGA-D8-A27I	III	Advanced	TCGA-E9-A1R2-01	TCGA-E9-A1R2	III	Advanced
TCGA-E2-A9RU-01	TCGA-E2-A9RU	III	Advanced	TCGA-D8-A27L-01	TCGA-D8-A27L	III	Advanced	TCGA-E9-A1R3-01	TCGA-E9-A1R3	III	Advanced
TCGA-E9-A1N3-01	TCGA-E9-A1N3	III	Advanced	TCGA-D8-A27N-01	TCGA-D8-A27N	III	Advanced	TCGA-E9-A1RC-01	TCGA-E9-A1RC	III	Advanced
TCGA-E9-A1N4-01	TCGA-E9-A1N4	III	Advanced	TCGA-D8-A27R-01	TCGA-D8-A27R	III	Advanced	TCGA-E9-A1RE-01	TCGA-E9-A1RE	III	Advanced
TCGA-E9-A1R2-01	TCGA-E9-A1R2	III	Advanced	TCGA-D8-A27T-01	TCGA-D8-A27T	III	Advanced	TCGA-E9-A1RF-01	TCGA-E9-A1RF	III	Advanced
TCGA-E9-A1R3-01	TCGA-E9-A1R3	III	Advanced	TCGA-D8-A27W-01	TCGA-D8-A27W	III	Advanced	TCGA-E9-A1RG-01	TCGA-E9-A1RG	III	Advanced
TCGA-E9-A1RC-01	TCGA-E9-A1RC	III	Advanced	TCGA-D8-A3Z5-01	TCGA-D8-A3Z5	III	Advanced	TCGA-E9-A1RI-01	TCGA-E9-A1RI	III	Advanced
TCGA-E9-A1RE-01	TCGA-E9-A1RE	III	Advanced	TCGA-D8-A3Z6-01	TCGA-D8-A3Z6	III	Advanced	TCGA-E9-A226-01	TCGA-E9-A226	III	Advanced
TCGA-E9-A1RF-01	TCGA-E9-A1RF	III	Advanced	TCGA-D8-A73W-01	TCGA-D8-A73W	III	Advanced	TCGA-E9-A22E-01	TCGA-E9-A22E	III	Advanced
TCGA-E9-A1RG-01	TCGA-E9-A1RG	III	Advanced	TCGA-E2-A107-01	TCGA-E2-A107	III	Advanced	TCGA-E9-A3Q9-01	TCGA-E9-A3Q9	III	Advanced
TCGA-E9-A1RI-01	TCGA-E9-A1RI	III	Advanced	TCGA-E2-A108-01	TCGA-E2-A108	III	Advanced	TCGA-E9-A54Y-01	TCGA-E9-A54Y	III	Advanced
TCGA-E9-A226-01	TCGA-E9-A226	III	Advanced	TCGA-E2-A14O-01	TCGA-E2-A14O	III	Advanced	TCGA-E9-A5FK-01	TCGA-E9-A5FK	III	Advanced
TCGA-E9-A22E-01	TCGA-E9-A22E	III	Advanced	TCGA-E2-A14P-01	TCGA-E2-A14P	III	Advanced	TCGA-E9-A6HE-01	TCGA-E9-A6HE	III	Advanced
TCGA-E9-A3Q9-01	TCGA-E9-A3Q9	III	Advanced	TCGA-E2-A14X-01	TCGA-E2-A14X	III	Advanced	TCGA-EW-A1IZ-01	TCGA-EW-A1IZ	III	Advanced
TCGA-E9-A54Y-01	TCGA-E9-A54Y	III	Advanced	TCGA-E2-A15A-01	TCGA-E2-A15A	III	Advanced	TCGA-EW-A1P1-01	TCGA-EW-A1P1	III	Advanced
TCGA-E9-A5FK-01	TCGA-E9-A5FK	III	Advanced	TCGA-E2-A1B0-01	TCGA-E2-A1B0	III	Advanced	TCGA-EW-A1P8-01	TCGA-EW-A1P8	III	Advanced
TCGA-E9-A6HE-01	TCGA-E9-A6HE	III	Advanced	TCGA-E2-A1B4-01	TCGA-E2-A1B4	III	Advanced	TCGA-EW-A1PB-01	TCGA-EW-A1PB	III	Advanced
TCGA-EW-A1IZ-01	TCGA-EW-A1IZ	III	Advanced	TCGA-E2-A1L7-01	TCGA-E2-A1L7	III	Advanced	TCGA-EW-A2FR-01	TCGA-EW-A2FR	III	Advanced
TCGA-EW-A1P1-01	TCGA-EW-A1P1	III	Advanced	TCGA-E2-A1LE-01	TCGA-E2-A1LE	III	Advanced	TCGA-EW-A2FV-01	TCGA-EW-A2FV	III	Advanced
TCGA-EW-A1P8-01	TCGA-EW-A1P8	III	Advanced	TCGA-E2-A1LK-01	TCGA-E2-A1LK	III	Advanced	TCGA-EW-A3U0-01	TCGA-EW-A3U0	III	Advanced
TCGA-EW-A1PB-01	TCGA-EW-A1PB	III	Advanced	TCGA-E2-A1LL-01	TCGA-E2-A1LL	III	Advanced	TCGA-EW-A424-01	TCGA-EW-A424	III	Advanced
TCGA-EW-A2FR-01	TCGA-EW-A2FR	III	Advanced	TCGA-E2-A2P5-01	TCGA-E2-A2P5	III	Advanced	TCGA-GI-A2C8-01	TCGA-GI-A2C8	III	Advanced
TCGA-EW-A2FV-01	TCGA-EW-A2FV	III	Advanced	TCGA-E2-A3DX-01	TCGA-E2-A3DX	III	Advanced	TCGA-GM-A3XG-01	TCGA-GM-A3XG	III	Advanced
TCGA-EW-A3U0-01	TCGA-EW-A3U0	III	Advanced	TCGA-E2-A572-01	TCGA-E2-A572	III	Advanced	TCGA-GM-A3XN-01	TCGA-GM-A3XN	III	Advanced
TCGA-EW-A424-01	TCGA-EW-A424	III	Advanced	TCGA-E2-A9RU-01	TCGA-E2-A9RU	III	Advanced	TCGA-GM-A4E0-01	TCGA-GM-A4E0	III	Advanced
TCGA-GI-A2C8-01	TCGA-GI-A2C8	III	Advanced	TCGA-E9-A1N3-01	TCGA-E9-A1N3	III	Advanced	TCGA-LD-A74U-01	TCGA-LD-A74U	III	Advanced
TCGA-GM-A3XG-01	TCGA-GM-A3XG	III	Advanced	TCGA-E9-A1N4-01	TCGA-E9-A1N4	III	Advanced	TCGA-LL-A5YM-01	TCGA-LL-A5YM	III	Advanced
TCGA-GM-A3XN-01	TCGA-GM-A3XN	III	Advanced	TCGA-E9-A1R2-01	TCGA-E9-A1R2	III	Advanced	TCGA-LL-A6FQ-01	TCGA-LL-A6FQ	III	Advanced
TCGA-GM-A4E0-01	TCGA-GM-A4E0	III	Advanced	TCGA-E9-A1R3-01	TCGA-E9-A1R3	III	Advanced	TCGA-LL-A9Q3-01	TCGA-LL-A9Q3	III	Advanced
TCGA-LD-A74U-01	TCGA-LD-A74U	III	Advanced	TCGA-E9-A1RC-01	TCGA-E9-A1RC	III	Advanced	TCGA-LQ-A4E4-01	TCGA-LQ-A4E4	III	Advanced
TCGA-LD-A7W5-01	TCGA-LD-A7W5	III	Advanced	TCGA-E9-A1RE-01	TCGA-E9-A1RE	III	Advanced	TCGA-OL-A5RV-01	TCGA-OL-A5RV	III	Advanced
TCGA-LL-A5YM-01	TCGA-LL-A5YM	III	Advanced	TCGA-E9-A1RF-01	TCGA-E9-A1RF	III	Advanced	TCGA-OL-A66N-01	TCGA-OL-A66N	III	Advanced
TCGA-LL-A6FQ-01	TCGA-LL-A6FQ	III	Advanced	TCGA-E9-A1RG-01	TCGA-E9-A1RG	III	Advanced	TCGA-PE-A5DC-01	TCGA-PE-A5DC	III	Advanced
TCGA-LL-A9Q3-01	TCGA-LL-A9Q3	III	Advanced	TCGA-E9-A1RI-01	TCGA-E9-A1RI	III	Advanced	TCGA-PL-A8LV-01	TCGA-PL-A8LV	III	Advanced
TCGA-LQ-A4E4-01	TCGA-LQ-A4E4	III	Advanced	TCGA-E9-A226-01	TCGA-E9-A226	III	Advanced	TCGA-PL-A8LZ-01	TCGA-PL-A8LZ	III	Advanced
TCGA-OL-A5RV-01	TCGA-OL-A5RV	III	Advanced	TCGA-E9-A22E-01	TCGA-E9-A22E	III	Advanced	TCGA-S3-A6ZH-01	TCGA-S3-A6ZH	III	Advanced
TCGA-OL-A66N-01	TCGA-OL-A66N	III	Advanced	TCGA-E9-A3Q9-01	TCGA-E9-A3Q9	III	Advanced	TCGA-S3-AA12-01	TCGA-S3-AA12	III	Advanced
TCGA-PE-A5DC-01	TCGA-PE-A5DC	III	Advanced	TCGA-E9-A54Y-01	TCGA-E9-A54Y	III	Advanced	TCGA-V7-A7HQ-01	TCGA-V7-A7HQ	III	Advanced
TCGA-PL-A8LV-01	TCGA-PL-A8LV	III	Advanced	TCGA-E9-A5FK-01	TCGA-E9-A5FK	III	Advanced	TCGA-XX-A899-01	TCGA-XX-A899	III	Advanced
TCGA-PL-A8LZ-01	TCGA-PL-A8LZ	III	Advanced	TCGA-E9-A6HE-01	TCGA-E9-A6HE	III	Advanced	TCGA-Z7-A8R5-01	TCGA-Z7-A8R5	III	Advanced
TCGA-S3-A6ZH-01	TCGA-S3-A6ZH	III	Advanced	TCGA-EW-A1IZ-01	TCGA-EW-A1IZ	III	Advanced	TCGA-3C-AAAU-01	TCGA-3C-AAAU	IV	Advanced
TCGA-S3-AA12-01	TCGA-S3-AA12	III	Advanced	TCGA-EW-A1P1-01	TCGA-EW-A1P1	III	Advanced	TCGA-5L-AAT1-01	TCGA-5L-AAT1	IV	Advanced
TCGA-V7-A7HQ-01	TCGA-V7-A7HQ	III	Advanced	TCGA-EW-A1P8-01	TCGA-EW-A1P8	III	Advanced	TCGA-A2-A0CS-01	TCGA-A2-A0CS	IV	Advanced
TCGA-XX-A899-01	TCGA-XX-A899	III	Advanced	TCGA-EW-A1PB-01	TCGA-EW-A1PB	III	Advanced	TCGA-A2-A0SV-01	TCGA-A2-A0SV	IV	Advanced
TCGA-Z7-A8R5-01	TCGA-Z7-A8R5	III	Advanced	TCGA-EW-A2FR-01	TCGA-EW-A2FR	III	Advanced	TCGA-A2-A0SW-01	TCGA-A2-A0SW	IV	Advanced
TCGA-3C-AAAU-01	TCGA-3C-AAAU	IV	Advanced	TCGA-EW-A2FV-01	TCGA-EW-A2FV	III	Advanced	TCGA-A2-A0T2-01	TCGA-A2-A0T2	IV	Advanced
TCGA-5L-AAT1-01	TCGA-5L-AAT1	IV	Advanced	TCGA-EW-A3U0-01	TCGA-EW-A3U0	III	Advanced	TCGA-A8-A07E-01	TCGA-A8-A07E	IV	Advanced
TCGA-A2-A0CS-01	TCGA-A2-A0CS	IV	Advanced	TCGA-EW-A424-01	TCGA-EW-A424	III	Advanced	TCGA-A8-A07W-01	TCGA-A8-A07W	IV	Advanced
TCGA-A2-A0SV-01	TCGA-A2-A0SV	IV	Advanced	TCGA-GI-A2C8-01	TCGA-GI-A2C8	III	Advanced	TCGA-A8-A08J-01	TCGA-A8-A08J	IV	Advanced
TCGA-A2-A0SW-01	TCGA-A2-A0SW	IV	Advanced	TCGA-GM-A3XG-01	TCGA-GM-A3XG	III	Advanced	TCGA-A8-A08O-01	TCGA-A8-A08O	IV	Advanced
TCGA-A2-A0T2-01	TCGA-A2-A0T2	IV	Advanced	TCGA-GM-A3XN-01	TCGA-GM-A3XN	III	Advanced	TCGA-A8-A08T-01	TCGA-A8-A08T	IV	Advanced
TCGA-A8-A07E-01	TCGA-A8-A07E	IV	Advanced	TCGA-GM-A4E0-01	TCGA-GM-A4E0	III	Advanced	TCGA-A8-A099-01	TCGA-A8-A099	IV	Advanced
TCGA-A8-A07W-01	TCGA-A8-A07W	IV	Advanced	TCGA-LD-A74U-01	TCGA-LD-A74U	III	Advanced	TCGA-A8-A09A-01	TCGA-A8-A09A	IV	Advanced
TCGA-A8-A08J-01	TCGA-A8-A08J	IV	Advanced	TCGA-LL-A5YM-01	TCGA-LL-A5YM	III	Advanced	TCGA-AC-A62V-01	TCGA-AC-A62V	IV	Advanced
TCGA-A8-A08O-01	TCGA-A8-A08O	IV	Advanced	TCGA-LL-A6FQ-01	TCGA-LL-A6FQ	III	Advanced	TCGA-AN-A0FJ-01	TCGA-AN-A0FJ	IV	Advanced
TCGA-A8-A08T-01	TCGA-A8-A08T	IV	Advanced	TCGA-LL-A9Q3-01	TCGA-LL-A9Q3	III	Advanced	TCGA-AO-A0J5-01	TCGA-AO-A0J5	IV	Advanced
TCGA-A8-A099-01	TCGA-A8-A099	IV	Advanced	TCGA-LQ-A4E4-01	TCGA-LQ-A4E4	III	Advanced	TCGA-B6-A0I8-01	TCGA-B6-A0I8	IV	Advanced
TCGA-A8-A09A-01	TCGA-A8-A09A	IV	Advanced	TCGA-OL-A5RV-01	TCGA-OL-A5RV	III	Advanced	TCGA-B6-A0I9-01	TCGA-B6-A0I9	IV	Advanced
TCGA-A8-A09C-01	TCGA-A8-A09C	IV	Advanced	TCGA-OL-A66N-01	TCGA-OL-A66N	III	Advanced	TCGA-B6-A0IB-01	TCGA-B6-A0IB	IV	Advanced
TCGA-AC-A62V-01	TCGA-AC-A62V	IV	Advanced	TCGA-PE-A5DC-01	TCGA-PE-A5DC	III	Advanced	TCGA-B6-A0IC-01	TCGA-B6-A0IC	IV	Advanced
TCGA-AN-A0FJ-01	TCGA-AN-A0FJ	IV	Advanced	TCGA-PL-A8LV-01	TCGA-PL-A8LV	III	Advanced	TCGA-B6-A0IN-01	TCGA-B6-A0IN	IV	Advanced
TCGA-AO-A0J5-01	TCGA-AO-A0J5	IV	Advanced	TCGA-PL-A8LZ-01	TCGA-PL-A8LZ	III	Advanced	TCGA-B6-A0RE-01	TCGA-B6-A0RE	IV	Advanced
TCGA-B6-A0I8-01	TCGA-B6-A0I8	IV	Advanced	TCGA-S3-A6ZH-01	TCGA-S3-A6ZH	III	Advanced	TCGA-B6-A0RM-01	TCGA-B6-A0RM	IV	Advanced
TCGA-B6-A0I9-01	TCGA-B6-A0I9	IV	Advanced	TCGA-S3-AA12-01	TCGA-S3-AA12	III	Advanced	TCGA-B6-A0WS-01	TCGA-B6-A0WS	IV	Advanced
TCGA-B6-A0IB-01	TCGA-B6-A0IB	IV	Advanced	TCGA-V7-A7HQ-01	TCGA-V7-A7HQ	III	Advanced	TCGA-B6-A0WW-01	TCGA-B6-A0WW	IV	Advanced
TCGA-B6-A0IC-01	TCGA-B6-A0IC	IV	Advanced	TCGA-XX-A899-01	TCGA-XX-A899	III	Advanced	TCGA-B6-A0X7-01	TCGA-B6-A0X7	IV	Advanced
TCGA-B6-A0IN-01	TCGA-B6-A0IN	IV	Advanced	TCGA-Z7-A8R5-01	TCGA-Z7-A8R5	III	Advanced	TCGA-B6-A3ZX-01	TCGA-B6-A3ZX	IV	Advanced
TCGA-B6-A0RE-01	TCGA-B6-A0RE	IV	Advanced	TCGA-3C-AAAU-01	TCGA-3C-AAAU	IV	Advanced	TCGA-BH-A18J-01	TCGA-BH-A18J	IV	Advanced
TCGA-B6-A0RM-01	TCGA-B6-A0RM	IV	Advanced	TCGA-5L-AAT1-01	TCGA-5L-AAT1	IV	Advanced	TCGA-BH-A1FH-01	TCGA-BH-A1FH	IV	Advanced
TCGA-B6-A0WS-01	TCGA-B6-A0WS	IV	Advanced	TCGA-A2-A0CS-01	TCGA-A2-A0CS	IV	Advanced	TCGA-LL-A73Z-01	TCGA-LL-A73Z	IV	Advanced
TCGA-B6-A0WW-01	TCGA-B6-A0WW	IV	Advanced	TCGA-A2-A0SV-01	TCGA-A2-A0SV	IV	Advanced	TCGA-PL-A8LX-01	TCGA-PL-A8LX	IV	Advanced
TCGA-B6-A0X7-01	TCGA-B6-A0X7	IV	Advanced	TCGA-A2-A0SW-01	TCGA-A2-A0SW	IV	Advanced	TCGA-UU-A93S-01	TCGA-UU-A93S	IV	Advanced
TCGA-B6-A3ZX-01	TCGA-B6-A3ZX	IV	Advanced	TCGA-A2-A0T2-01	TCGA-A2-A0T2	IV	Advanced	TCGA-A8-A08Z-01	TCGA-A8-A08Z	TNS	TNS
TCGA-BH-A18J-01	TCGA-BH-A18J	IV	Advanced	TCGA-A8-A07E-01	TCGA-A8-A07E	IV	Advanced	TCGA-A8-A09T-01	TCGA-A8-A09T	TNS	TNS
TCGA-BH-A1FH-01	TCGA-BH-A1FH	IV	Advanced	TCGA-A8-A07W-01	TCGA-A8-A07W	IV	Advanced	TCGA-AR-A0TZ-01	TCGA-AR-A0TZ	TNS	TNS
TCGA-LL-A73Z-01	TCGA-LL-A73Z	IV	Advanced	TCGA-A8-A08J-01	TCGA-A8-A08J	IV	Advanced	TCGA-B6-A0RP-01	TCGA-B6-A0RP	TNS	TNS
TCGA-PL-A8LX-01	TCGA-PL-A8LX	IV	Advanced	TCGA-A8-A08O-01	TCGA-A8-A08O	IV	Advanced	TCGA-BH-A1F6-01	TCGA-BH-A1F6	TNS	TNS
TCGA-UU-A93S-01	TCGA-UU-A93S	IV	Advanced	TCGA-A8-A08T-01	TCGA-A8-A08T	IV	Advanced	TCGA-D8-A13Z-01	TCGA-D8-A13Z	TNS	TNS
TCGA-A8-A08Z-01	TCGA-A8-A08Z	TNS	TNS	TCGA-A8-A099-01	TCGA-A8-A099	IV	Advanced	TCGA-D8-A141-01	TCGA-D8-A141	TNS	TNS
TCGA-A8-A09T-01	TCGA-A8-A09T	TNS	TNS	TCGA-A8-A09A-01	TCGA-A8-A09A	IV	Advanced	TCGA-D8-A147-01	TCGA-D8-A147	TNS	TNS
TCGA-AR-A0TZ-01	TCGA-AR-A0TZ	TNS	TNS	TCGA-AC-A62V-01	TCGA-AC-A62V	IV	Advanced	TCGA-D8-A1JA-01	TCGA-D8-A1JA	TNS	TNS
TCGA-B6-A0RP-01	TCGA-B6-A0RP	TNS	TNS	TCGA-AN-A0FJ-01	TCGA-AN-A0FJ	IV	Advanced	TCGA-EW-A1J2-01	TCGA-EW-A1J2	TNS	TNS
TCGA-BH-A1F6-01	TCGA-BH-A1F6	TNS	TNS	TCGA-AO-A0J5-01	TCGA-AO-A0J5	IV	Advanced
TCGA-D8-A13Z-01	TCGA-D8-A13Z	TNS	TNS	TCGA-B6-A0I8-01	TCGA-B6-A0I8	IV	Advanced
TCGA-D8-A141-01	TCGA-D8-A141	TNS	TNS	TCGA-B6-A0I9-01	TCGA-B6-A0I9	IV	Advanced
TCGA-D8-A147-01	TCGA-D8-A147	TNS	TNS	TCGA-B6-A0IB-01	TCGA-B6-A0IB	IV	Advanced
TCGA-D8-A1JA-01	TCGA-D8-A1JA	TNS	TNS	TCGA-B6-A0IC-01	TCGA-B6-A0IC	IV	Advanced
TCGA-EW-A1J2-01	TCGA-EW-A1J2	TNS	TNS	TCGA-B6-A0IN-01	TCGA-B6-A0IN	IV	Advanced
				TCGA-B6-A0RE-01	TCGA-B6-A0RE	IV	Advanced
				TCGA-B6-A0RM-01	TCGA-B6-A0RM	IV	Advanced
				TCGA-B6-A0WS-01	TCGA-B6-A0WS	IV	Advanced
				TCGA-B6-A0WW-01	TCGA-B6-A0WW	IV	Advanced
				TCGA-B6-A0X7-01	TCGA-B6-A0X7	IV	Advanced
				TCGA-B6-A3ZX-01	TCGA-B6-A3ZX	IV	Advanced
				TCGA-BH-A18J-01	TCGA-BH-A18J	IV	Advanced
				TCGA-BH-A1FH-01	TCGA-BH-A1FH	IV	Advanced
				TCGA-LL-A73Z-01	TCGA-LL-A73Z	IV	Advanced
				TCGA-PL-A8LX-01	TCGA-PL-A8LX	IV	Advanced
				TCGA-UU-A93S-01	TCGA-UU-A93S	IV	Advanced
				TCGA-A8-A08Z-01	TCGA-A8-A08Z	TNS	TNS
				TCGA-A8-A09T-01	TCGA-A8-A09T	TNS	TNS
				TCGA-AR-A0TZ-01	TCGA-AR-A0TZ	TNS	TNS
				TCGA-B6-A0RP-01	TCGA-B6-A0RP	TNS	TNS
				TCGA-B6-A0X1-01	TCGA-B6-A0X1	TNS	TNS
				TCGA-BH-A1F6-01	TCGA-BH-A1F6	TNS	TNS
				TCGA-D8-A13Z-01	TCGA-D8-A13Z	TNS	TNS
				TCGA-D8-A141-01	TCGA-D8-A141	TNS	TNS
				TCGA-D8-A147-01	TCGA-D8-A147	TNS	TNS
				TCGA-D8-A1JA-01	TCGA-D8-A1JA	TNS	TNS
				TCGA-EW-A1J2-01	TCGA-EW-A1J2	TNS	TNS

## Sheet: HNSC
Step 1 (Differential analysis )								Step 2 (Correlation analysis)				Step 3 (Confirm correlation result)
miRNA sequencing				RNA sequencing				RNA sequencing and miRNA sequencing				Paired samples
Samples	Patients	Stages	Groups	Samples	Patients	Stages	Groups	Samples	Patients	Stages	Groups	Samples	Patients	Stages	Groups
TCGA-CV-6933-11	TCGA-CV-6933	HC	HC	TCGA-CV-6933-11	TCGA-CV-6933	HC	HC	TCGA-CV-6933-11	TCGA-CV-6933	HC	HC	TCGA-CV-6933-11	TCGA-CV-6933	HC	HC
TCGA-CV-6934-11	TCGA-CV-6934	HC	HC	TCGA-CV-6934-11	TCGA-CV-6934	HC	HC	TCGA-CV-6934-11	TCGA-CV-6934	HC	HC	TCGA-CV-6933-01	TCGA-CV-6933	III	Advanced
TCGA-CV-6935-11	TCGA-CV-6935	HC	HC	TCGA-CV-6935-11	TCGA-CV-6935	HC	HC	TCGA-CV-6935-11	TCGA-CV-6935	HC	HC	TCGA-CV-6934-11	TCGA-CV-6934	HC	HC
TCGA-CV-6936-11	TCGA-CV-6936	HC	HC	TCGA-CV-6936-11	TCGA-CV-6936	HC	HC	TCGA-CV-6936-11	TCGA-CV-6936	HC	HC	TCGA-CV-6934-01	TCGA-CV-6934	IV	Advanced
TCGA-CV-6938-11	TCGA-CV-6938	HC	HC	TCGA-CV-6938-11	TCGA-CV-6938	HC	HC	TCGA-CV-6938-11	TCGA-CV-6938	HC	HC	TCGA-CV-6935-11	TCGA-CV-6935	HC	HC
TCGA-CV-6939-11	TCGA-CV-6939	HC	HC	TCGA-CV-6939-11	TCGA-CV-6939	HC	HC	TCGA-CV-6939-11	TCGA-CV-6939	HC	HC	TCGA-CV-6935-01	TCGA-CV-6935	IV	Advanced
TCGA-CV-6943-11	TCGA-CV-6943	HC	HC	TCGA-CV-6943-11	TCGA-CV-6943	HC	HC	TCGA-CV-6943-11	TCGA-CV-6943	HC	HC	TCGA-CV-6936-11	TCGA-CV-6936	HC	HC
TCGA-CV-6955-11	TCGA-CV-6955	HC	HC	TCGA-CV-6955-11	TCGA-CV-6955	HC	HC	TCGA-CV-6955-11	TCGA-CV-6955	HC	HC	TCGA-CV-6936-01	TCGA-CV-6936	IV	Advanced
TCGA-CV-6956-11	TCGA-CV-6956	HC	HC	TCGA-CV-6956-11	TCGA-CV-6956	HC	HC	TCGA-CV-6956-11	TCGA-CV-6956	HC	HC	TCGA-CV-6938-11	TCGA-CV-6938	HC	HC
TCGA-CV-6959-11	TCGA-CV-6959	HC	HC	TCGA-CV-6959-11	TCGA-CV-6959	HC	HC	TCGA-CV-6959-11	TCGA-CV-6959	HC	HC	TCGA-CV-6938-01	TCGA-CV-6938	II	Early
TCGA-CV-6960-11	TCGA-CV-6960	HC	HC	TCGA-CV-6960-11	TCGA-CV-6960	HC	HC	TCGA-CV-6960-11	TCGA-CV-6960	HC	HC	TCGA-CV-6939-11	TCGA-CV-6939	HC	HC
TCGA-CV-6961-11	TCGA-CV-6961	HC	HC	TCGA-CV-6961-11	TCGA-CV-6961	HC	HC	TCGA-CV-6961-11	TCGA-CV-6961	HC	HC	TCGA-CV-6939-01	TCGA-CV-6939	IV	Advanced
TCGA-CV-6962-11	TCGA-CV-6962	HC	HC	TCGA-CV-6962-11	TCGA-CV-6962	HC	HC	TCGA-CV-6962-11	TCGA-CV-6962	HC	HC	TCGA-CV-6943-11	TCGA-CV-6943	HC	HC
TCGA-CV-7091-11	TCGA-CV-7091	HC	HC	TCGA-CV-7091-11	TCGA-CV-7091	HC	HC	TCGA-CV-7091-11	TCGA-CV-7091	HC	HC	TCGA-CV-6943-01	TCGA-CV-6943	III	Advanced
TCGA-CV-7097-11	TCGA-CV-7097	HC	HC	TCGA-CV-7097-11	TCGA-CV-7097	HC	HC	TCGA-CV-7097-11	TCGA-CV-7097	HC	HC	TCGA-CV-6955-11	TCGA-CV-6955	HC	HC
TCGA-CV-7101-11	TCGA-CV-7101	HC	HC	TCGA-CV-7101-11	TCGA-CV-7101	HC	HC	TCGA-CV-7101-11	TCGA-CV-7101	HC	HC	TCGA-CV-6955-01	TCGA-CV-6955	II	Early
TCGA-CV-7103-11	TCGA-CV-7103	HC	HC	TCGA-CV-7103-11	TCGA-CV-7103	HC	HC	TCGA-CV-7103-11	TCGA-CV-7103	HC	HC	TCGA-CV-6956-11	TCGA-CV-6956	HC	HC
TCGA-CV-7177-11	TCGA-CV-7177	HC	HC	TCGA-CV-7177-11	TCGA-CV-7177	HC	HC	TCGA-CV-7177-11	TCGA-CV-7177	HC	HC	TCGA-CV-6956-01	TCGA-CV-6956	III	Advanced
TCGA-CV-7178-11	TCGA-CV-7178	HC	HC	TCGA-CV-7178-11	TCGA-CV-7178	HC	HC	TCGA-CV-7178-11	TCGA-CV-7178	HC	HC	TCGA-CV-6959-11	TCGA-CV-6959	HC	HC
TCGA-CV-7183-11	TCGA-CV-7183	HC	HC	TCGA-CV-7183-11	TCGA-CV-7183	HC	HC	TCGA-CV-7183-11	TCGA-CV-7183	HC	HC	TCGA-CV-6959-01	TCGA-CV-6959	III	Advanced
TCGA-CV-7235-11	TCGA-CV-7235	HC	HC	TCGA-CV-7235-11	TCGA-CV-7235	HC	HC	TCGA-CV-7235-11	TCGA-CV-7235	HC	HC	TCGA-CV-6960-11	TCGA-CV-6960	HC	HC
TCGA-CV-7238-11	TCGA-CV-7238	HC	HC	TCGA-CV-7238-11	TCGA-CV-7238	HC	HC	TCGA-CV-7238-11	TCGA-CV-7238	HC	HC	TCGA-CV-6960-01	TCGA-CV-6960	III	Advanced
TCGA-CV-7242-11	TCGA-CV-7242	HC	HC	TCGA-CV-7242-11	TCGA-CV-7242	HC	HC	TCGA-CV-7242-11	TCGA-CV-7242	HC	HC	TCGA-CV-6961-11	TCGA-CV-6961	HC	HC
TCGA-CV-7245-11	TCGA-CV-7245	HC	HC	TCGA-CV-7245-11	TCGA-CV-7245	HC	HC	TCGA-CV-7245-11	TCGA-CV-7245	HC	HC	TCGA-CV-6961-01	TCGA-CV-6961	II	Early
TCGA-CV-7250-11	TCGA-CV-7250	HC	HC	TCGA-CV-7250-11	TCGA-CV-7250	HC	HC	TCGA-CV-7250-11	TCGA-CV-7250	HC	HC	TCGA-CV-6962-11	TCGA-CV-6962	HC	HC
TCGA-CV-7252-11	TCGA-CV-7252	HC	HC	TCGA-CV-7252-11	TCGA-CV-7252	HC	HC	TCGA-CV-7252-11	TCGA-CV-7252	HC	HC	TCGA-CV-6962-01	TCGA-CV-6962	IV	Advanced
TCGA-CV-7255-11	TCGA-CV-7255	HC	HC	TCGA-CV-7255-11	TCGA-CV-7255	HC	HC	TCGA-CV-7255-11	TCGA-CV-7255	HC	HC	TCGA-CV-7091-11	TCGA-CV-7091	HC	HC
TCGA-CV-7261-11	TCGA-CV-7261	HC	HC	TCGA-CV-7261-11	TCGA-CV-7261	HC	HC	TCGA-CV-7261-11	TCGA-CV-7261	HC	HC	TCGA-CV-7091-01	TCGA-CV-7091	I	Early
TCGA-CV-7406-11	TCGA-CV-7406	HC	HC	TCGA-CV-7406-11	TCGA-CV-7406	HC	HC	TCGA-CV-7406-11	TCGA-CV-7406	HC	HC	TCGA-CV-7097-11	TCGA-CV-7097	HC	HC
TCGA-CV-7416-11	TCGA-CV-7416	HC	HC	TCGA-CV-7416-11	TCGA-CV-7416	HC	HC	TCGA-CV-7416-11	TCGA-CV-7416	HC	HC	TCGA-CV-7097-01	TCGA-CV-7097	II	Early
TCGA-CV-7423-11	TCGA-CV-7423	HC	HC	TCGA-CV-7423-11	TCGA-CV-7423	HC	HC	TCGA-CV-7423-11	TCGA-CV-7423	HC	HC	TCGA-CV-7101-11	TCGA-CV-7101	HC	HC
TCGA-CV-7424-11	TCGA-CV-7424	HC	HC	TCGA-CV-7424-11	TCGA-CV-7424	HC	HC	TCGA-CV-7424-11	TCGA-CV-7424	HC	HC	TCGA-CV-7101-01	TCGA-CV-7101	II	Early
TCGA-CV-7425-11	TCGA-CV-7425	HC	HC	TCGA-CV-7425-11	TCGA-CV-7425	HC	HC	TCGA-CV-7425-11	TCGA-CV-7425	HC	HC	TCGA-CV-7103-11	TCGA-CV-7103	HC	HC
TCGA-CV-7432-11	TCGA-CV-7432	HC	HC	TCGA-CV-7432-11	TCGA-CV-7432	HC	HC	TCGA-CV-7432-11	TCGA-CV-7432	HC	HC	TCGA-CV-7103-01	TCGA-CV-7103	IV	Advanced
TCGA-CV-7434-11	TCGA-CV-7434	HC	HC	TCGA-CV-7434-11	TCGA-CV-7434	HC	HC	TCGA-CV-7434-11	TCGA-CV-7434	HC	HC	TCGA-CV-7177-11	TCGA-CV-7177	HC	HC
TCGA-CV-7437-11	TCGA-CV-7437	HC	HC	TCGA-CV-7437-11	TCGA-CV-7437	HC	HC	TCGA-CV-7437-11	TCGA-CV-7437	HC	HC	TCGA-CV-7177-01	TCGA-CV-7177	II	Early
TCGA-CV-7438-11	TCGA-CV-7438	HC	HC	TCGA-CV-7438-11	TCGA-CV-7438	HC	HC	TCGA-CV-7438-11	TCGA-CV-7438	HC	HC	TCGA-CV-7178-11	TCGA-CV-7178	HC	HC
TCGA-CV-7440-11	TCGA-CV-7440	HC	HC	TCGA-CV-7440-11	TCGA-CV-7440	HC	HC	TCGA-CV-7440-11	TCGA-CV-7440	HC	HC	TCGA-CV-7178-01	TCGA-CV-7178	IV	Advanced
TCGA-H7-A6C4-11	TCGA-H7-A6C4	HC	HC	TCGA-H7-A6C4-11	TCGA-H7-A6C4	HC	HC	TCGA-H7-A6C4-11	TCGA-H7-A6C4	HC	HC	TCGA-CV-7183-11	TCGA-CV-7183	HC	HC
TCGA-H7-A6C5-11	TCGA-H7-A6C5	HC	HC	TCGA-H7-A6C5-11	TCGA-H7-A6C5	HC	HC	TCGA-H7-A6C5-11	TCGA-H7-A6C5	HC	HC	TCGA-CV-7183-01	TCGA-CV-7183	II	Early
TCGA-HD-8635-11	TCGA-HD-8635	HC	HC	TCGA-HD-8635-11	TCGA-HD-8635	HC	HC	TCGA-HD-8635-11	TCGA-HD-8635	HC	HC	TCGA-CV-7235-11	TCGA-CV-7235	HC	HC
TCGA-HD-A6HZ-11	TCGA-HD-A6HZ	HC	HC	TCGA-HD-A6HZ-11	TCGA-HD-A6HZ	HC	HC	TCGA-HD-A6HZ-11	TCGA-HD-A6HZ	HC	HC	TCGA-CV-7235-01	TCGA-CV-7235	II	Early
TCGA-HD-A6I0-11	TCGA-HD-A6I0	HC	HC	TCGA-HD-A6I0-11	TCGA-HD-A6I0	HC	HC	TCGA-HD-A6I0-11	TCGA-HD-A6I0	HC	HC	TCGA-CV-7238-11	TCGA-CV-7238	HC	HC
TCGA-WA-A7GZ-11	TCGA-WA-A7GZ	HC	HC	TCGA-WA-A7GZ-11	TCGA-WA-A7GZ	HC	HC	TCGA-WA-A7GZ-11	TCGA-WA-A7GZ	HC	HC	TCGA-CV-7238-01	TCGA-CV-7238	II	Early
TCGA-BA-A6DB-01	TCGA-BA-A6DB	I	Early	TCGA-BA-A6DB-01	TCGA-BA-A6DB	I	Early	TCGA-BA-A6DB-01	TCGA-BA-A6DB	I	Early	TCGA-CV-7242-11	TCGA-CV-7242	HC	HC
TCGA-BB-7872-01	TCGA-BB-7872	I	Early	TCGA-CN-5373-01	TCGA-CN-5373	I	Early	TCGA-CN-5373-01	TCGA-CN-5373	I	Early	TCGA-CV-7242-01	TCGA-CV-7242	II	Early
TCGA-CN-5373-01	TCGA-CN-5373	I	Early	TCGA-CQ-5323-01	TCGA-CQ-5323	I	Early	TCGA-CQ-5323-01	TCGA-CQ-5323	I	Early	TCGA-CV-7245-11	TCGA-CV-7245	HC	HC
TCGA-CQ-5323-01	TCGA-CQ-5323	I	Early	TCGA-CQ-5325-01	TCGA-CQ-5325	I	Early	TCGA-CQ-5325-01	TCGA-CQ-5325	I	Early	TCGA-CV-7245-01	TCGA-CV-7245	IV	Advanced
TCGA-CQ-5325-01	TCGA-CQ-5325	I	Early	TCGA-CQ-7063-01	TCGA-CQ-7063	I	Early	TCGA-CQ-7063-01	TCGA-CQ-7063	I	Early	TCGA-CV-7250-11	TCGA-CV-7250	HC	HC
TCGA-CQ-7063-01	TCGA-CQ-7063	I	Early	TCGA-CR-6487-01	TCGA-CR-6487	I	Early	TCGA-CR-6487-01	TCGA-CR-6487	I	Early	TCGA-CV-7250-01	TCGA-CV-7250	IV	Advanced
TCGA-CQ-7067-01	TCGA-CQ-7067	I	Early	TCGA-CR-7372-01	TCGA-CR-7372	I	Early	TCGA-CR-7372-01	TCGA-CR-7372	I	Early	TCGA-CV-7252-11	TCGA-CV-7252	HC	HC
TCGA-CR-6487-01	TCGA-CR-6487	I	Early	TCGA-CR-7383-01	TCGA-CR-7383	I	Early	TCGA-CR-7383-01	TCGA-CR-7383	I	Early	TCGA-CV-7252-01	TCGA-CV-7252	IV	Advanced
TCGA-CR-7372-01	TCGA-CR-7372	I	Early	TCGA-CR-7391-01	TCGA-CR-7391	I	Early	TCGA-CR-7391-01	TCGA-CR-7391	I	Early	TCGA-CV-7255-11	TCGA-CV-7255	HC	HC
TCGA-CR-7383-01	TCGA-CR-7383	I	Early	TCGA-CR-7401-01	TCGA-CR-7401	I	Early	TCGA-CR-7401-01	TCGA-CR-7401	I	Early	TCGA-CV-7255-01	TCGA-CV-7255	IV	Advanced
TCGA-CR-7391-01	TCGA-CR-7391	I	Early	TCGA-CV-7091-01	TCGA-CV-7091	I	Early	TCGA-CV-7091-01	TCGA-CV-7091	I	Early	TCGA-CV-7261-11	TCGA-CV-7261	HC	HC
TCGA-CR-7401-01	TCGA-CR-7401	I	Early	TCGA-CV-7438-01	TCGA-CV-7438	I	Early	TCGA-CV-7438-01	TCGA-CV-7438	I	Early	TCGA-CV-7261-01	TCGA-CV-7261	IV	Advanced
TCGA-CV-7091-01	TCGA-CV-7091	I	Early	TCGA-CV-A45P-01	TCGA-CV-A45P	I	Early	TCGA-CV-A45P-01	TCGA-CV-A45P	I	Early	TCGA-CV-7406-11	TCGA-CV-7406	HC	HC
TCGA-CV-7438-01	TCGA-CV-7438	I	Early	TCGA-CV-A6K0-01	TCGA-CV-A6K0	I	Early	TCGA-CV-A6K0-01	TCGA-CV-A6K0	I	Early	TCGA-CV-7406-01	TCGA-CV-7406	II	Early
TCGA-CV-A45P-01	TCGA-CV-A45P	I	Early	TCGA-CX-7085-01	TCGA-CX-7085	I	Early	TCGA-CX-7085-01	TCGA-CX-7085	I	Early	TCGA-CV-7416-11	TCGA-CV-7416	HC	HC
TCGA-CV-A6K0-01	TCGA-CV-A6K0	I	Early	TCGA-D6-6516-01	TCGA-D6-6516	I	Early	TCGA-D6-6516-01	TCGA-D6-6516	I	Early	TCGA-CV-7416-01	TCGA-CV-7416	IV	Advanced
TCGA-CX-7085-01	TCGA-CX-7085	I	Early	TCGA-D6-6825-01	TCGA-D6-6825	I	Early	TCGA-D6-6825-01	TCGA-D6-6825	I	Early	TCGA-CV-7423-11	TCGA-CV-7423	HC	HC
TCGA-D6-6516-01	TCGA-D6-6516	I	Early	TCGA-D6-6827-01	TCGA-D6-6827	I	Early	TCGA-D6-6827-01	TCGA-D6-6827	I	Early	TCGA-CV-7423-01	TCGA-CV-7423	II	Early
TCGA-D6-6825-01	TCGA-D6-6825	I	Early	TCGA-F7-8298-01	TCGA-F7-8298	I	Early	TCGA-F7-8298-01	TCGA-F7-8298	I	Early	TCGA-CV-7424-11	TCGA-CV-7424	HC	HC
TCGA-D6-6827-01	TCGA-D6-6827	I	Early	TCGA-HD-7753-01	TCGA-HD-7753	I	Early	TCGA-HD-7753-01	TCGA-HD-7753	I	Early	TCGA-CV-7424-01	TCGA-CV-7424	IV	Advanced
TCGA-F7-8298-01	TCGA-F7-8298	I	Early	TCGA-HD-8634-01	TCGA-HD-8634	I	Early	TCGA-HD-8634-01	TCGA-HD-8634	I	Early	TCGA-CV-7425-11	TCGA-CV-7425	HC	HC
TCGA-HD-7753-01	TCGA-HD-7753	I	Early	TCGA-MT-A51W-01	TCGA-MT-A51W	I	Early	TCGA-MT-A51W-01	TCGA-MT-A51W	I	Early	TCGA-CV-7425-01	TCGA-CV-7425	III	Advanced
TCGA-HD-8634-01	TCGA-HD-8634	I	Early	TCGA-MT-A67A-01	TCGA-MT-A67A	I	Early	TCGA-MT-A67A-01	TCGA-MT-A67A	I	Early	TCGA-CV-7432-11	TCGA-CV-7432	HC	HC
TCGA-MT-A51W-01	TCGA-MT-A51W	I	Early	TCGA-P3-A5QA-01	TCGA-P3-A5QA	I	Early	TCGA-P3-A5QA-01	TCGA-P3-A5QA	I	Early	TCGA-CV-7432-01	TCGA-CV-7432	II	Early
TCGA-MT-A67A-01	TCGA-MT-A67A	I	Early	TCGA-QK-AA3J-01	TCGA-QK-AA3J	I	Early	TCGA-QK-AA3J-01	TCGA-QK-AA3J	I	Early	TCGA-CV-7434-11	TCGA-CV-7434	HC	HC
TCGA-P3-A5QA-01	TCGA-P3-A5QA	I	Early	TCGA-BA-5556-01	TCGA-BA-5556	II	Early	TCGA-BA-5556-01	TCGA-BA-5556	II	Early	TCGA-CV-7434-01	TCGA-CV-7434	IV	Advanced
TCGA-QK-AA3J-01	TCGA-QK-AA3J	I	Early	TCGA-BA-A4II-01	TCGA-BA-A4II	II	Early	TCGA-BA-A4II-01	TCGA-BA-A4II	II	Early	TCGA-CV-7437-11	TCGA-CV-7437	HC	HC
TCGA-BA-5556-01	TCGA-BA-5556	II	Early	TCGA-BA-A6DE-01	TCGA-BA-A6DE	II	Early	TCGA-BA-A6DE-01	TCGA-BA-A6DE	II	Early	TCGA-CV-7437-01	TCGA-CV-7437	II	Early
TCGA-BA-A4II-01	TCGA-BA-A4II	II	Early	TCGA-CN-4722-01	TCGA-CN-4722	II	Early	TCGA-CN-4722-01	TCGA-CN-4722	II	Early	TCGA-CV-7438-11	TCGA-CV-7438	HC	HC
TCGA-BA-A6DE-01	TCGA-BA-A6DE	II	Early	TCGA-CN-4725-01	TCGA-CN-4725	II	Early	TCGA-CN-4725-01	TCGA-CN-4725	II	Early	TCGA-CV-7438-01	TCGA-CV-7438	I	Early
TCGA-CN-4722-01	TCGA-CN-4722	II	Early	TCGA-CN-4734-01	TCGA-CN-4734	II	Early	TCGA-CN-5358-01	TCGA-CN-5358	II	Early	TCGA-CV-7440-11	TCGA-CV-7440	HC	HC
TCGA-CN-4725-01	TCGA-CN-4725	II	Early	TCGA-CN-5358-01	TCGA-CN-5358	II	Early	TCGA-CN-A499-01	TCGA-CN-A499	II	Early	TCGA-CV-7440-01	TCGA-CV-7440	II	Early
TCGA-CN-5358-01	TCGA-CN-5358	II	Early	TCGA-CN-A499-01	TCGA-CN-A499	II	Early	TCGA-CQ-5329-01	TCGA-CQ-5329	II	Early	TCGA-H7-A6C4-11	TCGA-H7-A6C4	HC	HC
TCGA-CN-A499-01	TCGA-CN-A499	II	Early	TCGA-CQ-5329-01	TCGA-CQ-5329	II	Early	TCGA-CQ-5333-01	TCGA-CQ-5333	II	Early	TCGA-H7-A6C4-01	TCGA-H7-A6C4	IV	Advanced
TCGA-CN-A63Y-01	TCGA-CN-A63Y	II	Early	TCGA-CQ-5333-01	TCGA-CQ-5333	II	Early	TCGA-CQ-6223-01	TCGA-CQ-6223	II	Early	TCGA-HD-8635-11	TCGA-HD-8635	HC	HC
TCGA-CQ-5329-01	TCGA-CQ-5329	II	Early	TCGA-CQ-6223-01	TCGA-CQ-6223	II	Early	TCGA-CQ-6229-01	TCGA-CQ-6229	II	Early	TCGA-HD-8635-01	TCGA-HD-8635	III	Advanced
TCGA-CQ-5333-01	TCGA-CQ-5333	II	Early	TCGA-CQ-6229-01	TCGA-CQ-6229	II	Early	TCGA-CQ-7065-01	TCGA-CQ-7065	II	Early	TCGA-HD-A6HZ-11	TCGA-HD-A6HZ	HC	HC
TCGA-CQ-6223-01	TCGA-CQ-6223	II	Early	TCGA-CQ-7065-01	TCGA-CQ-7065	II	Early	TCGA-CQ-7068-01	TCGA-CQ-7068	II	Early	TCGA-HD-A6HZ-01	TCGA-HD-A6HZ	III	Advanced
TCGA-CQ-6229-01	TCGA-CQ-6229	II	Early	TCGA-CQ-7068-01	TCGA-CQ-7068	II	Early	TCGA-CQ-7069-01	TCGA-CQ-7069	II	Early	TCGA-HD-A6I0-11	TCGA-HD-A6I0	HC	HC
TCGA-CQ-7065-01	TCGA-CQ-7065	II	Early	TCGA-CQ-7069-01	TCGA-CQ-7069	II	Early	TCGA-CQ-7072-01	TCGA-CQ-7072	II	Early	TCGA-HD-A6I0-01	TCGA-HD-A6I0	IV	Advanced
TCGA-CQ-7068-01	TCGA-CQ-7068	II	Early	TCGA-CQ-7072-01	TCGA-CQ-7072	II	Early	TCGA-CQ-A4C6-01	TCGA-CQ-A4C6	II	Early
TCGA-CQ-7069-01	TCGA-CQ-7069	II	Early	TCGA-CQ-A4C6-01	TCGA-CQ-A4C6	II	Early	TCGA-CQ-A4CA-01	TCGA-CQ-A4CA	II	Early
TCGA-CQ-7072-01	TCGA-CQ-7072	II	Early	TCGA-CQ-A4CA-01	TCGA-CQ-A4CA	II	Early	TCGA-CQ-A4CE-01	TCGA-CQ-A4CE	II	Early
TCGA-CQ-A4C6-01	TCGA-CQ-A4C6	II	Early	TCGA-CQ-A4CE-01	TCGA-CQ-A4CE	II	Early	TCGA-CQ-A4CH-01	TCGA-CQ-A4CH	II	Early
TCGA-CQ-A4CA-01	TCGA-CQ-A4CA	II	Early	TCGA-CQ-A4CH-01	TCGA-CQ-A4CH	II	Early	TCGA-CR-5249-01	TCGA-CR-5249	II	Early
TCGA-CQ-A4CE-01	TCGA-CQ-A4CE	II	Early	TCGA-CR-5249-01	TCGA-CR-5249	II	Early	TCGA-CR-6470-01	TCGA-CR-6470	II	Early
TCGA-CQ-A4CH-01	TCGA-CQ-A4CH	II	Early	TCGA-CR-6470-01	TCGA-CR-6470	II	Early	TCGA-CR-6488-01	TCGA-CR-6488	II	Early
TCGA-CR-5249-01	TCGA-CR-5249	II	Early	TCGA-CR-6488-01	TCGA-CR-6488	II	Early	TCGA-CR-7395-01	TCGA-CR-7395	II	Early
TCGA-CR-6470-01	TCGA-CR-6470	II	Early	TCGA-CR-7395-01	TCGA-CR-7395	II	Early	TCGA-CR-7398-01	TCGA-CR-7398	II	Early
TCGA-CR-6488-01	TCGA-CR-6488	II	Early	TCGA-CR-7398-01	TCGA-CR-7398	II	Early	TCGA-CV-6433-01	TCGA-CV-6433	II	Early
TCGA-CR-7395-01	TCGA-CR-7395	II	Early	TCGA-CV-6433-01	TCGA-CV-6433	II	Early	TCGA-CV-6937-01	TCGA-CV-6937	II	Early
TCGA-CR-7398-01	TCGA-CR-7398	II	Early	TCGA-CV-6937-01	TCGA-CV-6937	II	Early	TCGA-CV-6938-01	TCGA-CV-6938	II	Early
TCGA-CV-6433-01	TCGA-CV-6433	II	Early	TCGA-CV-6938-01	TCGA-CV-6938	II	Early	TCGA-CV-6942-01	TCGA-CV-6942	II	Early
TCGA-CV-6937-01	TCGA-CV-6937	II	Early	TCGA-CV-6942-01	TCGA-CV-6942	II	Early	TCGA-CV-6955-01	TCGA-CV-6955	II	Early
TCGA-CV-6938-01	TCGA-CV-6938	II	Early	TCGA-CV-6955-01	TCGA-CV-6955	II	Early	TCGA-CV-6961-01	TCGA-CV-6961	II	Early
TCGA-CV-6942-01	TCGA-CV-6942	II	Early	TCGA-CV-6961-01	TCGA-CV-6961	II	Early	TCGA-CV-7090-01	TCGA-CV-7090	II	Early
TCGA-CV-6955-01	TCGA-CV-6955	II	Early	TCGA-CV-7090-01	TCGA-CV-7090	II	Early	TCGA-CV-7095-01	TCGA-CV-7095	II	Early
TCGA-CV-6961-01	TCGA-CV-6961	II	Early	TCGA-CV-7095-01	TCGA-CV-7095	II	Early	TCGA-CV-7097-01	TCGA-CV-7097	II	Early
TCGA-CV-7090-01	TCGA-CV-7090	II	Early	TCGA-CV-7097-01	TCGA-CV-7097	II	Early	TCGA-CV-7099-01	TCGA-CV-7099	II	Early
TCGA-CV-7095-01	TCGA-CV-7095	II	Early	TCGA-CV-7099-01	TCGA-CV-7099	II	Early	TCGA-CV-7101-01	TCGA-CV-7101	II	Early
TCGA-CV-7097-01	TCGA-CV-7097	II	Early	TCGA-CV-7101-01	TCGA-CV-7101	II	Early	TCGA-CV-7177-01	TCGA-CV-7177	II	Early
TCGA-CV-7099-01	TCGA-CV-7099	II	Early	TCGA-CV-7177-01	TCGA-CV-7177	II	Early	TCGA-CV-7180-01	TCGA-CV-7180	II	Early
TCGA-CV-7101-01	TCGA-CV-7101	II	Early	TCGA-CV-7180-01	TCGA-CV-7180	II	Early	TCGA-CV-7183-01	TCGA-CV-7183	II	Early
TCGA-CV-7177-01	TCGA-CV-7177	II	Early	TCGA-CV-7183-01	TCGA-CV-7183	II	Early	TCGA-CV-7235-01	TCGA-CV-7235	II	Early
TCGA-CV-7180-01	TCGA-CV-7180	II	Early	TCGA-CV-7235-01	TCGA-CV-7235	II	Early	TCGA-CV-7238-01	TCGA-CV-7238	II	Early
TCGA-CV-7183-01	TCGA-CV-7183	II	Early	TCGA-CV-7238-01	TCGA-CV-7238	II	Early	TCGA-CV-7242-01	TCGA-CV-7242	II	Early
TCGA-CV-7235-01	TCGA-CV-7235	II	Early	TCGA-CV-7242-01	TCGA-CV-7242	II	Early	TCGA-CV-7254-01	TCGA-CV-7254	II	Early
TCGA-CV-7238-01	TCGA-CV-7238	II	Early	TCGA-CV-7254-01	TCGA-CV-7254	II	Early	TCGA-CV-7263-01	TCGA-CV-7263	II	Early
TCGA-CV-7242-01	TCGA-CV-7242	II	Early	TCGA-CV-7263-01	TCGA-CV-7263	II	Early	TCGA-CV-7406-01	TCGA-CV-7406	II	Early
TCGA-CV-7254-01	TCGA-CV-7254	II	Early	TCGA-CV-7406-01	TCGA-CV-7406	II	Early	TCGA-CV-7407-01	TCGA-CV-7407	II	Early
TCGA-CV-7263-01	TCGA-CV-7263	II	Early	TCGA-CV-7407-01	TCGA-CV-7407	II	Early	TCGA-CV-7413-01	TCGA-CV-7413	II	Early
TCGA-CV-7406-01	TCGA-CV-7406	II	Early	TCGA-CV-7413-01	TCGA-CV-7413	II	Early	TCGA-CV-7423-01	TCGA-CV-7423	II	Early
TCGA-CV-7407-01	TCGA-CV-7407	II	Early	TCGA-CV-7423-01	TCGA-CV-7423	II	Early	TCGA-CV-7427-01	TCGA-CV-7427	II	Early
TCGA-CV-7413-01	TCGA-CV-7413	II	Early	TCGA-CV-7427-01	TCGA-CV-7427	II	Early	TCGA-CV-7432-01	TCGA-CV-7432	II	Early
TCGA-CV-7423-01	TCGA-CV-7423	II	Early	TCGA-CV-7432-01	TCGA-CV-7432	II	Early	TCGA-CV-7437-01	TCGA-CV-7437	II	Early
TCGA-CV-7427-01	TCGA-CV-7427	II	Early	TCGA-CV-7437-01	TCGA-CV-7437	II	Early	TCGA-CV-7440-01	TCGA-CV-7440	II	Early
TCGA-CV-7432-01	TCGA-CV-7432	II	Early	TCGA-CV-7440-01	TCGA-CV-7440	II	Early	TCGA-CV-A45W-01	TCGA-CV-A45W	II	Early
TCGA-CV-7437-01	TCGA-CV-7437	II	Early	TCGA-CV-A45W-01	TCGA-CV-A45W	II	Early	TCGA-CV-A6JT-01	TCGA-CV-A6JT	II	Early
TCGA-CV-7440-01	TCGA-CV-7440	II	Early	TCGA-CV-A6JT-01	TCGA-CV-A6JT	II	Early	TCGA-CV-A6JZ-01	TCGA-CV-A6JZ	II	Early
TCGA-CV-A45W-01	TCGA-CV-A45W	II	Early	TCGA-CV-A6JZ-01	TCGA-CV-A6JZ	II	Early	TCGA-D6-6515-01	TCGA-D6-6515	II	Early
TCGA-CV-A6JT-01	TCGA-CV-A6JT	II	Early	TCGA-D6-6515-01	TCGA-D6-6515	II	Early	TCGA-D6-6823-01	TCGA-D6-6823	II	Early
TCGA-CV-A6JZ-01	TCGA-CV-A6JZ	II	Early	TCGA-D6-6823-01	TCGA-D6-6823	II	Early	TCGA-D6-8568-01	TCGA-D6-8568	II	Early
TCGA-D6-6515-01	TCGA-D6-6515	II	Early	TCGA-D6-8568-01	TCGA-D6-8568	II	Early	TCGA-D6-8569-01	TCGA-D6-8569	II	Early
TCGA-D6-6823-01	TCGA-D6-6823	II	Early	TCGA-D6-8569-01	TCGA-D6-8569	II	Early	TCGA-F7-8489-01	TCGA-F7-8489	II	Early
TCGA-D6-8568-01	TCGA-D6-8568	II	Early	TCGA-F7-8489-01	TCGA-F7-8489	II	Early	TCGA-F7-A61V-01	TCGA-F7-A61V	II	Early
TCGA-D6-8569-01	TCGA-D6-8569	II	Early	TCGA-F7-A61V-01	TCGA-F7-A61V	II	Early	TCGA-F7-A624-01	TCGA-F7-A624	II	Early
TCGA-F7-8489-01	TCGA-F7-8489	II	Early	TCGA-F7-A624-01	TCGA-F7-A624	II	Early	TCGA-IQ-7630-01	TCGA-IQ-7630	II	Early
TCGA-F7-A61V-01	TCGA-F7-A61V	II	Early	TCGA-IQ-7630-01	TCGA-IQ-7630	II	Early	TCGA-IQ-7631-01	TCGA-IQ-7631	II	Early
TCGA-F7-A624-01	TCGA-F7-A624	II	Early	TCGA-IQ-7631-01	TCGA-IQ-7631	II	Early	TCGA-IQ-A61H-01	TCGA-IQ-A61H	II	Early
TCGA-H7-A6C5-01	TCGA-H7-A6C5	II	Early	TCGA-IQ-A61H-01	TCGA-IQ-A61H	II	Early	TCGA-MT-A67D-01	TCGA-MT-A67D	II	Early
TCGA-HD-7917-01	TCGA-HD-7917	II	Early	TCGA-MT-A67D-01	TCGA-MT-A67D	II	Early	TCGA-QK-A6V9-01	TCGA-QK-A6V9	II	Early
TCGA-IQ-7630-01	TCGA-IQ-7630	II	Early	TCGA-QK-A6V9-01	TCGA-QK-A6V9	II	Early	TCGA-RS-A6TP-01	TCGA-RS-A6TP	II	Early
TCGA-IQ-7631-01	TCGA-IQ-7631	II	Early	TCGA-RS-A6TP-01	TCGA-RS-A6TP	II	Early	TCGA-UF-A719-01	TCGA-UF-A719	II	Early
TCGA-IQ-A61H-01	TCGA-IQ-A61H	II	Early	TCGA-UF-A719-01	TCGA-UF-A719	II	Early	TCGA-WA-A7H4-01	TCGA-WA-A7H4	II	Early
TCGA-IQ-A61L-01	TCGA-IQ-A61L	II	Early	TCGA-WA-A7H4-01	TCGA-WA-A7H4	II	Early	TCGA-BA-5557-01	TCGA-BA-5557	III	Advanced
TCGA-MT-A67D-01	TCGA-MT-A67D	II	Early	TCGA-BA-4075-01	TCGA-BA-4075	III	Advanced	TCGA-BA-6869-01	TCGA-BA-6869	III	Advanced
TCGA-QK-A6V9-01	TCGA-QK-A6V9	II	Early	TCGA-BA-5557-01	TCGA-BA-5557	III	Advanced	TCGA-BA-7269-01	TCGA-BA-7269	III	Advanced
TCGA-RS-A6TP-01	TCGA-RS-A6TP	II	Early	TCGA-BA-6869-01	TCGA-BA-6869	III	Advanced	TCGA-BB-4228-01	TCGA-BB-4228	III	Advanced
TCGA-UF-A719-01	TCGA-UF-A719	II	Early	TCGA-BA-7269-01	TCGA-BA-7269	III	Advanced	TCGA-BB-8601-01	TCGA-BB-8601	III	Advanced
TCGA-WA-A7H4-01	TCGA-WA-A7H4	II	Early	TCGA-BB-4228-01	TCGA-BB-4228	III	Advanced	TCGA-C9-A47Z-01	TCGA-C9-A47Z	III	Advanced
TCGA-BA-5557-01	TCGA-BA-5557	III	Advanced	TCGA-BB-8601-01	TCGA-BB-8601	III	Advanced	TCGA-C9-A480-01	TCGA-C9-A480	III	Advanced
TCGA-BA-6869-01	TCGA-BA-6869	III	Advanced	TCGA-BB-A6UM-01	TCGA-BB-A6UM	III	Advanced	TCGA-CN-4729-01	TCGA-CN-4729	III	Advanced
TCGA-BA-7269-01	TCGA-BA-7269	III	Advanced	TCGA-C9-A47Z-01	TCGA-C9-A47Z	III	Advanced	TCGA-CN-4733-01	TCGA-CN-4733	III	Advanced
TCGA-BB-4228-01	TCGA-BB-4228	III	Advanced	TCGA-C9-A480-01	TCGA-C9-A480	III	Advanced	TCGA-CN-5356-01	TCGA-CN-5356	III	Advanced
TCGA-BB-7861-01	TCGA-BB-7861	III	Advanced	TCGA-CN-4729-01	TCGA-CN-4729	III	Advanced	TCGA-CN-5370-01	TCGA-CN-5370	III	Advanced
TCGA-BB-7863-01	TCGA-BB-7863	III	Advanced	TCGA-CN-4733-01	TCGA-CN-4733	III	Advanced	TCGA-CN-6020-01	TCGA-CN-6020	III	Advanced
TCGA-BB-8601-01	TCGA-BB-8601	III	Advanced	TCGA-CN-5356-01	TCGA-CN-5356	III	Advanced	TCGA-CN-A497-01	TCGA-CN-A497	III	Advanced
TCGA-C9-A47Z-01	TCGA-C9-A47Z	III	Advanced	TCGA-CN-5370-01	TCGA-CN-5370	III	Advanced	TCGA-CN-A498-01	TCGA-CN-A498	III	Advanced
TCGA-C9-A480-01	TCGA-C9-A480	III	Advanced	TCGA-CN-6020-01	TCGA-CN-6020	III	Advanced	TCGA-CN-A49B-01	TCGA-CN-A49B	III	Advanced
TCGA-CN-4729-01	TCGA-CN-4729	III	Advanced	TCGA-CN-A497-01	TCGA-CN-A497	III	Advanced	TCGA-CQ-5324-01	TCGA-CQ-5324	III	Advanced
TCGA-CN-4733-01	TCGA-CN-4733	III	Advanced	TCGA-CN-A498-01	TCGA-CN-A498	III	Advanced	TCGA-CQ-5332-01	TCGA-CQ-5332	III	Advanced
TCGA-CN-5356-01	TCGA-CN-5356	III	Advanced	TCGA-CN-A49B-01	TCGA-CN-A49B	III	Advanced	TCGA-CQ-6220-01	TCGA-CQ-6220	III	Advanced
TCGA-CN-5370-01	TCGA-CN-5370	III	Advanced	TCGA-CQ-5324-01	TCGA-CQ-5324	III	Advanced	TCGA-CQ-6225-01	TCGA-CQ-6225	III	Advanced
TCGA-CN-6020-01	TCGA-CN-6020	III	Advanced	TCGA-CQ-5332-01	TCGA-CQ-5332	III	Advanced	TCGA-CQ-7071-01	TCGA-CQ-7071	III	Advanced
TCGA-CN-A497-01	TCGA-CN-A497	III	Advanced	TCGA-CQ-6220-01	TCGA-CQ-6220	III	Advanced	TCGA-CQ-A4C7-01	TCGA-CQ-A4C7	III	Advanced
TCGA-CN-A498-01	TCGA-CN-A498	III	Advanced	TCGA-CQ-6225-01	TCGA-CQ-6225	III	Advanced	TCGA-CQ-A4C9-01	TCGA-CQ-A4C9	III	Advanced
TCGA-CN-A49B-01	TCGA-CN-A49B	III	Advanced	TCGA-CQ-7071-01	TCGA-CQ-7071	III	Advanced	TCGA-CQ-A4CB-01	TCGA-CQ-A4CB	III	Advanced
TCGA-CQ-5324-01	TCGA-CQ-5324	III	Advanced	TCGA-CQ-A4C7-01	TCGA-CQ-A4C7	III	Advanced	TCGA-CQ-A4CG-01	TCGA-CQ-A4CG	III	Advanced
TCGA-CQ-5332-01	TCGA-CQ-5332	III	Advanced	TCGA-CQ-A4C9-01	TCGA-CQ-A4C9	III	Advanced	TCGA-CQ-A4CI-01	TCGA-CQ-A4CI	III	Advanced
TCGA-CQ-6220-01	TCGA-CQ-6220	III	Advanced	TCGA-CQ-A4CB-01	TCGA-CQ-A4CB	III	Advanced	TCGA-CR-6467-01	TCGA-CR-6467	III	Advanced
TCGA-CQ-6225-01	TCGA-CQ-6225	III	Advanced	TCGA-CQ-A4CG-01	TCGA-CQ-A4CG	III	Advanced	TCGA-CR-6492-01	TCGA-CR-6492	III	Advanced
TCGA-CQ-7064-01	TCGA-CQ-7064	III	Advanced	TCGA-CQ-A4CI-01	TCGA-CQ-A4CI	III	Advanced	TCGA-CR-7364-01	TCGA-CR-7364	III	Advanced
TCGA-CQ-7071-01	TCGA-CQ-7071	III	Advanced	TCGA-CR-6467-01	TCGA-CR-6467	III	Advanced	TCGA-CR-7371-01	TCGA-CR-7371	III	Advanced
TCGA-CQ-A4C7-01	TCGA-CQ-A4C7	III	Advanced	TCGA-CR-6492-01	TCGA-CR-6492	III	Advanced	TCGA-CR-7376-01	TCGA-CR-7376	III	Advanced
TCGA-CQ-A4C9-01	TCGA-CQ-A4C9	III	Advanced	TCGA-CR-7364-01	TCGA-CR-7364	III	Advanced	TCGA-CR-7393-01	TCGA-CR-7393	III	Advanced
TCGA-CQ-A4CB-01	TCGA-CQ-A4CB	III	Advanced	TCGA-CR-7371-01	TCGA-CR-7371	III	Advanced	TCGA-CV-5432-01	TCGA-CV-5432	III	Advanced
TCGA-CQ-A4CG-01	TCGA-CQ-A4CG	III	Advanced	TCGA-CR-7376-01	TCGA-CR-7376	III	Advanced	TCGA-CV-5443-01	TCGA-CV-5443	III	Advanced
TCGA-CQ-A4CI-01	TCGA-CQ-A4CI	III	Advanced	TCGA-CR-7393-01	TCGA-CR-7393	III	Advanced	TCGA-CV-5973-01	TCGA-CV-5973	III	Advanced
TCGA-CR-6467-01	TCGA-CR-6467	III	Advanced	TCGA-CV-5432-01	TCGA-CV-5432	III	Advanced	TCGA-CV-6003-01	TCGA-CV-6003	III	Advanced
TCGA-CR-6492-01	TCGA-CR-6492	III	Advanced	TCGA-CV-5443-01	TCGA-CV-5443	III	Advanced	TCGA-CV-6441-01	TCGA-CV-6441	III	Advanced
TCGA-CR-7364-01	TCGA-CR-7364	III	Advanced	TCGA-CV-5973-01	TCGA-CV-5973	III	Advanced	TCGA-CV-6933-01	TCGA-CV-6933	III	Advanced
TCGA-CR-7371-01	TCGA-CR-7371	III	Advanced	TCGA-CV-6003-01	TCGA-CV-6003	III	Advanced	TCGA-CV-6940-01	TCGA-CV-6940	III	Advanced
TCGA-CR-7376-01	TCGA-CR-7376	III	Advanced	TCGA-CV-6441-01	TCGA-CV-6441	III	Advanced	TCGA-CV-6941-01	TCGA-CV-6941	III	Advanced
TCGA-CR-7393-01	TCGA-CR-7393	III	Advanced	TCGA-CV-6933-01	TCGA-CV-6933	III	Advanced	TCGA-CV-6943-01	TCGA-CV-6943	III	Advanced
TCGA-CV-5432-01	TCGA-CV-5432	III	Advanced	TCGA-CV-6940-01	TCGA-CV-6940	III	Advanced	TCGA-CV-6953-01	TCGA-CV-6953	III	Advanced
TCGA-CV-5443-01	TCGA-CV-5443	III	Advanced	TCGA-CV-6941-01	TCGA-CV-6941	III	Advanced	TCGA-CV-6956-01	TCGA-CV-6956	III	Advanced
TCGA-CV-5973-01	TCGA-CV-5973	III	Advanced	TCGA-CV-6943-01	TCGA-CV-6943	III	Advanced	TCGA-CV-6959-01	TCGA-CV-6959	III	Advanced
TCGA-CV-6003-01	TCGA-CV-6003	III	Advanced	TCGA-CV-6953-01	TCGA-CV-6953	III	Advanced	TCGA-CV-6960-01	TCGA-CV-6960	III	Advanced
TCGA-CV-6441-01	TCGA-CV-6441	III	Advanced	TCGA-CV-6956-01	TCGA-CV-6956	III	Advanced	TCGA-CV-7100-01	TCGA-CV-7100	III	Advanced
TCGA-CV-6933-01	TCGA-CV-6933	III	Advanced	TCGA-CV-6959-01	TCGA-CV-6959	III	Advanced	TCGA-CV-7247-01	TCGA-CV-7247	III	Advanced
TCGA-CV-6940-01	TCGA-CV-6940	III	Advanced	TCGA-CV-6960-01	TCGA-CV-6960	III	Advanced	TCGA-CV-7410-01	TCGA-CV-7410	III	Advanced
TCGA-CV-6941-01	TCGA-CV-6941	III	Advanced	TCGA-CV-7100-01	TCGA-CV-7100	III	Advanced	TCGA-CV-7425-01	TCGA-CV-7425	III	Advanced
TCGA-CV-6943-01	TCGA-CV-6943	III	Advanced	TCGA-CV-7247-01	TCGA-CV-7247	III	Advanced	TCGA-CV-A45R-01	TCGA-CV-A45R	III	Advanced
TCGA-CV-6953-01	TCGA-CV-6953	III	Advanced	TCGA-CV-7410-01	TCGA-CV-7410	III	Advanced	TCGA-CV-A464-01	TCGA-CV-A464	III	Advanced
TCGA-CV-6956-01	TCGA-CV-6956	III	Advanced	TCGA-CV-7425-01	TCGA-CV-7425	III	Advanced	TCGA-CV-A465-01	TCGA-CV-A465	III	Advanced
TCGA-CV-6959-01	TCGA-CV-6959	III	Advanced	TCGA-CV-A45R-01	TCGA-CV-A45R	III	Advanced	TCGA-CX-7086-01	TCGA-CX-7086	III	Advanced
TCGA-CV-6960-01	TCGA-CV-6960	III	Advanced	TCGA-CV-A464-01	TCGA-CV-A464	III	Advanced	TCGA-D6-6517-01	TCGA-D6-6517	III	Advanced
TCGA-CV-7100-01	TCGA-CV-7100	III	Advanced	TCGA-CV-A465-01	TCGA-CV-A465	III	Advanced	TCGA-D6-A4ZB-01	TCGA-D6-A4ZB	III	Advanced
TCGA-CV-7243-01	TCGA-CV-7243	III	Advanced	TCGA-CX-7086-01	TCGA-CX-7086	III	Advanced	TCGA-D6-A6EK-01	TCGA-D6-A6EK	III	Advanced
TCGA-CV-7247-01	TCGA-CV-7247	III	Advanced	TCGA-D6-6517-01	TCGA-D6-6517	III	Advanced	TCGA-D6-A6EM-01	TCGA-D6-A6EM	III	Advanced
TCGA-CV-7410-01	TCGA-CV-7410	III	Advanced	TCGA-D6-A4ZB-01	TCGA-D6-A4ZB	III	Advanced	TCGA-D6-A6EN-01	TCGA-D6-A6EN	III	Advanced
TCGA-CV-7425-01	TCGA-CV-7425	III	Advanced	TCGA-D6-A6EK-01	TCGA-D6-A6EK	III	Advanced	TCGA-D6-A6EP-01	TCGA-D6-A6EP	III	Advanced
TCGA-CV-A45R-01	TCGA-CV-A45R	III	Advanced	TCGA-D6-A6EM-01	TCGA-D6-A6EM	III	Advanced	TCGA-F7-A50G-01	TCGA-F7-A50G	III	Advanced
TCGA-CV-A464-01	TCGA-CV-A464	III	Advanced	TCGA-D6-A6EN-01	TCGA-D6-A6EN	III	Advanced	TCGA-F7-A50J-01	TCGA-F7-A50J	III	Advanced
TCGA-CV-A465-01	TCGA-CV-A465	III	Advanced	TCGA-D6-A6EP-01	TCGA-D6-A6EP	III	Advanced	TCGA-F7-A61S-01	TCGA-F7-A61S	III	Advanced
TCGA-CX-7086-01	TCGA-CX-7086	III	Advanced	TCGA-F7-A50G-01	TCGA-F7-A50G	III	Advanced	TCGA-F7-A620-01	TCGA-F7-A620	III	Advanced
TCGA-D6-6517-01	TCGA-D6-6517	III	Advanced	TCGA-F7-A50J-01	TCGA-F7-A50J	III	Advanced	TCGA-F7-A622-01	TCGA-F7-A622	III	Advanced
TCGA-D6-A4ZB-01	TCGA-D6-A4ZB	III	Advanced	TCGA-F7-A61S-01	TCGA-F7-A61S	III	Advanced	TCGA-HD-8314-01	TCGA-HD-8314	III	Advanced
TCGA-D6-A6EK-01	TCGA-D6-A6EK	III	Advanced	TCGA-F7-A620-01	TCGA-F7-A620	III	Advanced	TCGA-HD-8635-01	TCGA-HD-8635	III	Advanced
TCGA-D6-A6EM-01	TCGA-D6-A6EM	III	Advanced	TCGA-F7-A622-01	TCGA-F7-A622	III	Advanced	TCGA-HD-A6HZ-01	TCGA-HD-A6HZ	III	Advanced
TCGA-D6-A6EN-01	TCGA-D6-A6EN	III	Advanced	TCGA-HD-8314-01	TCGA-HD-8314	III	Advanced	TCGA-IQ-A61E-01	TCGA-IQ-A61E	III	Advanced
TCGA-D6-A6EP-01	TCGA-D6-A6EP	III	Advanced	TCGA-HD-8635-01	TCGA-HD-8635	III	Advanced	TCGA-IQ-A6SH-01	TCGA-IQ-A6SH	III	Advanced
TCGA-F7-A50G-01	TCGA-F7-A50G	III	Advanced	TCGA-HD-A6HZ-01	TCGA-HD-A6HZ	III	Advanced	TCGA-KU-A66S-01	TCGA-KU-A66S	III	Advanced
TCGA-F7-A50J-01	TCGA-F7-A50J	III	Advanced	TCGA-IQ-A61E-01	TCGA-IQ-A61E	III	Advanced	TCGA-P3-A5QE-01	TCGA-P3-A5QE	III	Advanced
TCGA-F7-A61S-01	TCGA-F7-A61S	III	Advanced	TCGA-IQ-A6SG-01	TCGA-IQ-A6SG	III	Advanced	TCGA-P3-A6SX-01	TCGA-P3-A6SX	III	Advanced
TCGA-F7-A620-01	TCGA-F7-A620	III	Advanced	TCGA-IQ-A6SH-01	TCGA-IQ-A6SH	III	Advanced	TCGA-QK-A652-01	TCGA-QK-A652	III	Advanced
TCGA-F7-A622-01	TCGA-F7-A622	III	Advanced	TCGA-KU-A66S-01	TCGA-KU-A66S	III	Advanced	TCGA-QK-A6IG-01	TCGA-QK-A6IG	III	Advanced
TCGA-HD-8314-01	TCGA-HD-8314	III	Advanced	TCGA-P3-A5QE-01	TCGA-P3-A5QE	III	Advanced	TCGA-QK-A6IJ-01	TCGA-QK-A6IJ	III	Advanced
TCGA-HD-8635-01	TCGA-HD-8635	III	Advanced	TCGA-P3-A6SX-01	TCGA-P3-A6SX	III	Advanced	TCGA-T2-A6X2-01	TCGA-T2-A6X2	III	Advanced
TCGA-HD-A6HZ-01	TCGA-HD-A6HZ	III	Advanced	TCGA-QK-A652-01	TCGA-QK-A652	III	Advanced	TCGA-4P-AA8J-01	TCGA-4P-AA8J	IV	Advanced
TCGA-IQ-A61E-01	TCGA-IQ-A61E	III	Advanced	TCGA-QK-A6IG-01	TCGA-QK-A6IG	III	Advanced	TCGA-BA-4074-01	TCGA-BA-4074	IV	Advanced
TCGA-IQ-A6SH-01	TCGA-IQ-A6SH	III	Advanced	TCGA-QK-A6IJ-01	TCGA-QK-A6IJ	III	Advanced	TCGA-BA-4077-01	TCGA-BA-4077	IV	Advanced
TCGA-KU-A66S-01	TCGA-KU-A66S	III	Advanced	TCGA-T2-A6X2-01	TCGA-T2-A6X2	III	Advanced	TCGA-BA-5151-01	TCGA-BA-5151	IV	Advanced
TCGA-P3-A5QE-01	TCGA-P3-A5QE	III	Advanced	TCGA-4P-AA8J-01	TCGA-4P-AA8J	IV	Advanced	TCGA-BA-5152-01	TCGA-BA-5152	IV	Advanced
TCGA-P3-A6SX-01	TCGA-P3-A6SX	III	Advanced	TCGA-BA-4074-01	TCGA-BA-4074	IV	Advanced	TCGA-BA-5555-01	TCGA-BA-5555	IV	Advanced
TCGA-QK-A652-01	TCGA-QK-A652	III	Advanced	TCGA-BA-4077-01	TCGA-BA-4077	IV	Advanced	TCGA-BA-6873-01	TCGA-BA-6873	IV	Advanced
TCGA-QK-A6IG-01	TCGA-QK-A6IG	III	Advanced	TCGA-BA-5151-01	TCGA-BA-5151	IV	Advanced	TCGA-BA-A6D8-01	TCGA-BA-A6D8	IV	Advanced
TCGA-QK-A6IJ-01	TCGA-QK-A6IJ	III	Advanced	TCGA-BA-5152-01	TCGA-BA-5152	IV	Advanced	TCGA-BA-A6DA-01	TCGA-BA-A6DA	IV	Advanced
TCGA-T2-A6X2-01	TCGA-T2-A6X2	III	Advanced	TCGA-BA-5555-01	TCGA-BA-5555	IV	Advanced	TCGA-BA-A6DD-01	TCGA-BA-A6DD	IV	Advanced
TCGA-4P-AA8J-01	TCGA-4P-AA8J	IV	Advanced	TCGA-BA-6873-01	TCGA-BA-6873	IV	Advanced	TCGA-BA-A6DJ-01	TCGA-BA-A6DJ	IV	Advanced
TCGA-BA-4074-01	TCGA-BA-4074	IV	Advanced	TCGA-BA-A6D8-01	TCGA-BA-A6D8	IV	Advanced	TCGA-BA-A8YP-01	TCGA-BA-A8YP	IV	Advanced
TCGA-BA-4077-01	TCGA-BA-4077	IV	Advanced	TCGA-BA-A6DA-01	TCGA-BA-A6DA	IV	Advanced	TCGA-BB-4217-01	TCGA-BB-4217	IV	Advanced
TCGA-BA-5149-01	TCGA-BA-5149	IV	Advanced	TCGA-BA-A6DD-01	TCGA-BA-A6DD	IV	Advanced	TCGA-BB-4223-01	TCGA-BB-4223	IV	Advanced
TCGA-BA-5151-01	TCGA-BA-5151	IV	Advanced	TCGA-BA-A6DJ-01	TCGA-BA-A6DJ	IV	Advanced	TCGA-BB-4224-01	TCGA-BB-4224	IV	Advanced
TCGA-BA-5152-01	TCGA-BA-5152	IV	Advanced	TCGA-BA-A8YP-01	TCGA-BA-A8YP	IV	Advanced	TCGA-BB-4227-01	TCGA-BB-4227	IV	Advanced
TCGA-BA-5555-01	TCGA-BA-5555	IV	Advanced	TCGA-BB-4217-01	TCGA-BB-4217	IV	Advanced	TCGA-BB-8596-01	TCGA-BB-8596	IV	Advanced
TCGA-BA-6873-01	TCGA-BA-6873	IV	Advanced	TCGA-BB-4223-01	TCGA-BB-4223	IV	Advanced	TCGA-BB-A5HU-01	TCGA-BB-A5HU	IV	Advanced
TCGA-BA-A6D8-01	TCGA-BA-A6D8	IV	Advanced	TCGA-BB-4224-01	TCGA-BB-4224	IV	Advanced	TCGA-BB-A5HY-01	TCGA-BB-A5HY	IV	Advanced
TCGA-BA-A6DA-01	TCGA-BA-A6DA	IV	Advanced	TCGA-BB-4227-01	TCGA-BB-4227	IV	Advanced	TCGA-BB-A5HZ-01	TCGA-BB-A5HZ	IV	Advanced
TCGA-BA-A6DD-01	TCGA-BA-A6DD	IV	Advanced	TCGA-BB-8596-01	TCGA-BB-8596	IV	Advanced	TCGA-BB-A6UO-01	TCGA-BB-A6UO	IV	Advanced
TCGA-BA-A6DF-01	TCGA-BA-A6DF	IV	Advanced	TCGA-BB-A5HU-01	TCGA-BB-A5HU	IV	Advanced	TCGA-CN-4723-01	TCGA-CN-4723	IV	Advanced
TCGA-BA-A6DJ-01	TCGA-BA-A6DJ	IV	Advanced	TCGA-BB-A5HY-01	TCGA-BB-A5HY	IV	Advanced	TCGA-CN-4726-01	TCGA-CN-4726	IV	Advanced
TCGA-BA-A8YP-01	TCGA-BA-A8YP	IV	Advanced	TCGA-BB-A5HZ-01	TCGA-BB-A5HZ	IV	Advanced	TCGA-CN-4727-01	TCGA-CN-4727	IV	Advanced
TCGA-BB-4217-01	TCGA-BB-4217	IV	Advanced	TCGA-BB-A6UO-01	TCGA-BB-A6UO	IV	Advanced	TCGA-CN-4728-01	TCGA-CN-4728	IV	Advanced
TCGA-BB-4223-01	TCGA-BB-4223	IV	Advanced	TCGA-CN-4723-01	TCGA-CN-4723	IV	Advanced	TCGA-CN-4730-01	TCGA-CN-4730	IV	Advanced
TCGA-BB-4224-01	TCGA-BB-4224	IV	Advanced	TCGA-CN-4726-01	TCGA-CN-4726	IV	Advanced	TCGA-CN-4731-01	TCGA-CN-4731	IV	Advanced
TCGA-BB-4227-01	TCGA-BB-4227	IV	Advanced	TCGA-CN-4727-01	TCGA-CN-4727	IV	Advanced	TCGA-CN-4735-01	TCGA-CN-4735	IV	Advanced
TCGA-BB-7862-01	TCGA-BB-7862	IV	Advanced	TCGA-CN-4728-01	TCGA-CN-4728	IV	Advanced	TCGA-CN-4737-01	TCGA-CN-4737	IV	Advanced
TCGA-BB-7864-01	TCGA-BB-7864	IV	Advanced	TCGA-CN-4730-01	TCGA-CN-4730	IV	Advanced	TCGA-CN-4738-01	TCGA-CN-4738	IV	Advanced
TCGA-BB-7870-01	TCGA-BB-7870	IV	Advanced	TCGA-CN-4731-01	TCGA-CN-4731	IV	Advanced	TCGA-CN-4739-01	TCGA-CN-4739	IV	Advanced
TCGA-BB-7871-01	TCGA-BB-7871	IV	Advanced	TCGA-CN-4735-01	TCGA-CN-4735	IV	Advanced	TCGA-CN-4740-01	TCGA-CN-4740	IV	Advanced
TCGA-BB-8596-01	TCGA-BB-8596	IV	Advanced	TCGA-CN-4737-01	TCGA-CN-4737	IV	Advanced	TCGA-CN-4741-01	TCGA-CN-4741	IV	Advanced
TCGA-BB-A5HU-01	TCGA-BB-A5HU	IV	Advanced	TCGA-CN-4738-01	TCGA-CN-4738	IV	Advanced	TCGA-CN-4742-01	TCGA-CN-4742	IV	Advanced
TCGA-BB-A5HY-01	TCGA-BB-A5HY	IV	Advanced	TCGA-CN-4739-01	TCGA-CN-4739	IV	Advanced	TCGA-CN-5355-01	TCGA-CN-5355	IV	Advanced
TCGA-BB-A5HZ-01	TCGA-BB-A5HZ	IV	Advanced	TCGA-CN-4740-01	TCGA-CN-4740	IV	Advanced	TCGA-CN-5359-01	TCGA-CN-5359	IV	Advanced
TCGA-BB-A6UO-01	TCGA-BB-A6UO	IV	Advanced	TCGA-CN-4741-01	TCGA-CN-4741	IV	Advanced	TCGA-CN-5360-01	TCGA-CN-5360	IV	Advanced
TCGA-CN-4723-01	TCGA-CN-4723	IV	Advanced	TCGA-CN-4742-01	TCGA-CN-4742	IV	Advanced	TCGA-CN-5361-01	TCGA-CN-5361	IV	Advanced
TCGA-CN-4726-01	TCGA-CN-4726	IV	Advanced	TCGA-CN-5355-01	TCGA-CN-5355	IV	Advanced	TCGA-CN-5363-01	TCGA-CN-5363	IV	Advanced
TCGA-CN-4727-01	TCGA-CN-4727	IV	Advanced	TCGA-CN-5359-01	TCGA-CN-5359	IV	Advanced	TCGA-CN-5364-01	TCGA-CN-5364	IV	Advanced
TCGA-CN-4728-01	TCGA-CN-4728	IV	Advanced	TCGA-CN-5360-01	TCGA-CN-5360	IV	Advanced	TCGA-CN-5365-01	TCGA-CN-5365	IV	Advanced
TCGA-CN-4730-01	TCGA-CN-4730	IV	Advanced	TCGA-CN-5361-01	TCGA-CN-5361	IV	Advanced	TCGA-CN-5366-01	TCGA-CN-5366	IV	Advanced
TCGA-CN-4731-01	TCGA-CN-4731	IV	Advanced	TCGA-CN-5363-01	TCGA-CN-5363	IV	Advanced	TCGA-CN-5367-01	TCGA-CN-5367	IV	Advanced
TCGA-CN-4735-01	TCGA-CN-4735	IV	Advanced	TCGA-CN-5364-01	TCGA-CN-5364	IV	Advanced	TCGA-CN-5369-01	TCGA-CN-5369	IV	Advanced
TCGA-CN-4737-01	TCGA-CN-4737	IV	Advanced	TCGA-CN-5365-01	TCGA-CN-5365	IV	Advanced	TCGA-CN-5374-01	TCGA-CN-5374	IV	Advanced
TCGA-CN-4738-01	TCGA-CN-4738	IV	Advanced	TCGA-CN-5366-01	TCGA-CN-5366	IV	Advanced	TCGA-CN-6010-01	TCGA-CN-6010	IV	Advanced
TCGA-CN-4739-01	TCGA-CN-4739	IV	Advanced	TCGA-CN-5367-01	TCGA-CN-5367	IV	Advanced	TCGA-CN-6011-01	TCGA-CN-6	IV	Advanced
TCGA-CN-4740-01	TCGA-CN-4740	IV	Advanced	TCGA-CN-5369-01	TCGA-CN-5369	IV	Advanced	TCGA-CN-6012-01	TCGA-CN-6012	IV	Advanced
TCGA-CN-4741-01	TCGA-CN-4741	IV	Advanced	TCGA-CN-5374-01	TCGA-CN-5374	IV	Advanced	TCGA-CN-6013-01	TCGA-CN-6013	IV	Advanced
TCGA-CN-4742-01	TCGA-CN-4742	IV	Advanced	TCGA-CN-6010-01	TCGA-CN-6010	IV	Advanced	TCGA-CN-6016-01	TCGA-CN-6016	IV	Advanced
TCGA-CN-5355-01	TCGA-CN-5355	IV	Advanced	TCGA-CN-6011-01	TCGA-CN-6011	IV	Advanced	TCGA-CN-6017-01	TCGA-CN-6017	IV	Advanced
TCGA-CN-5359-01	TCGA-CN-5359	IV	Advanced	TCGA-CN-6012-01	TCGA-CN-6012	IV	Advanced	TCGA-CN-6018-01	TCGA-CN-6018	IV	Advanced
TCGA-CN-5360-01	TCGA-CN-5360	IV	Advanced	TCGA-CN-6013-01	TCGA-CN-6013	IV	Advanced	TCGA-CN-6019-01	TCGA-CN-6019	IV	Advanced
TCGA-CN-5361-01	TCGA-CN-5361	IV	Advanced	TCGA-CN-6016-01	TCGA-CN-6016	IV	Advanced	TCGA-CN-6022-01	TCGA-CN-6022	IV	Advanced
TCGA-CN-5363-01	TCGA-CN-5363	IV	Advanced	TCGA-CN-6017-01	TCGA-CN-6017	IV	Advanced	TCGA-CN-6023-01	TCGA-CN-6023	IV	Advanced
TCGA-CN-5364-01	TCGA-CN-5364	IV	Advanced	TCGA-CN-6018-01	TCGA-CN-6018	IV	Advanced	TCGA-CN-6024-01	TCGA-CN-6024	IV	Advanced
TCGA-CN-5365-01	TCGA-CN-5365	IV	Advanced	TCGA-CN-6019-01	TCGA-CN-6019	IV	Advanced	TCGA-CN-6988-01	TCGA-CN-6988	IV	Advanced
TCGA-CN-5366-01	TCGA-CN-5366	IV	Advanced	TCGA-CN-6022-01	TCGA-CN-6022	IV	Advanced	TCGA-CN-6989-01	TCGA-CN-6989	IV	Advanced
TCGA-CN-5367-01	TCGA-CN-5367	IV	Advanced	TCGA-CN-6023-01	TCGA-CN-6023	IV	Advanced	TCGA-CN-6992-01	TCGA-CN-6992	IV	Advanced
TCGA-CN-5369-01	TCGA-CN-5369	IV	Advanced	TCGA-CN-6024-01	TCGA-CN-6024	IV	Advanced	TCGA-CN-6994-01	TCGA-CN-6994	IV	Advanced
TCGA-CN-5374-01	TCGA-CN-5374	IV	Advanced	TCGA-CN-6988-01	TCGA-CN-6988	IV	Advanced	TCGA-CN-6995-01	TCGA-CN-6995	IV	Advanced
TCGA-CN-6010-01	TCGA-CN-6010	IV	Advanced	TCGA-CN-6989-01	TCGA-CN-6989	IV	Advanced	TCGA-CN-6996-01	TCGA-CN-6996	IV	Advanced
TCGA-CN-6011-01	TCGA-CN-6011	IV	Advanced	TCGA-CN-6992-01	TCGA-CN-6992	IV	Advanced	TCGA-CN-6997-01	TCGA-CN-6997	IV	Advanced
TCGA-CN-6012-01	TCGA-CN-6012	IV	Advanced	TCGA-CN-6994-01	TCGA-CN-6994	IV	Advanced	TCGA-CN-6998-01	TCGA-CN-6998	IV	Advanced
TCGA-CN-6013-01	TCGA-CN-6013	IV	Advanced	TCGA-CN-6995-01	TCGA-CN-6995	IV	Advanced	TCGA-CN-A49A-01	TCGA-CN-A49A	IV	Advanced
TCGA-CN-6016-01	TCGA-CN-6016	IV	Advanced	TCGA-CN-6996-01	TCGA-CN-6996	IV	Advanced	TCGA-CN-A63T-01	TCGA-CN-A63T	IV	Advanced
TCGA-CN-6017-01	TCGA-CN-6017	IV	Advanced	TCGA-CN-6997-01	TCGA-CN-6997	IV	Advanced	TCGA-CN-A63U-01	TCGA-CN-A63U	IV	Advanced
TCGA-CN-6018-01	TCGA-CN-6018	IV	Advanced	TCGA-CN-6998-01	TCGA-CN-6998	IV	Advanced	TCGA-CN-A63V-01	TCGA-CN-A63V	IV	Advanced
TCGA-CN-6019-01	TCGA-CN-6019	IV	Advanced	TCGA-CN-A49A-01	TCGA-CN-A49A	IV	Advanced	TCGA-CN-A63W-01	TCGA-CN-A63W	IV	Advanced
TCGA-CN-6022-01	TCGA-CN-6022	IV	Advanced	TCGA-CN-A63T-01	TCGA-CN-A63T	IV	Advanced	TCGA-CN-A641-01	TCGA-CN-A641	IV	Advanced
TCGA-CN-6023-01	TCGA-CN-6023	IV	Advanced	TCGA-CN-A63U-01	TCGA-CN-A63U	IV	Advanced	TCGA-CN-A642-01	TCGA-CN-A642	IV	Advanced
TCGA-CN-6024-01	TCGA-CN-6024	IV	Advanced	TCGA-CN-A63V-01	TCGA-CN-A63V	IV	Advanced	TCGA-CN-A6UY-01	TCGA-CN-A6UY	IV	Advanced
TCGA-CN-6988-01	TCGA-CN-6988	IV	Advanced	TCGA-CN-A63W-01	TCGA-CN-A63W	IV	Advanced	TCGA-CN-A6V3-01	TCGA-CN-A6V3	IV	Advanced
TCGA-CN-6989-01	TCGA-CN-6989	IV	Advanced	TCGA-CN-A641-01	TCGA-CN-A641	IV	Advanced	TCGA-CN-A6V6-01	TCGA-CN-A6V6	IV	Advanced
TCGA-CN-6992-01	TCGA-CN-6992	IV	Advanced	TCGA-CN-A642-01	TCGA-CN-A642	IV	Advanced	TCGA-CN-A6V7-01	TCGA-CN-A6V7	IV	Advanced
TCGA-CN-6994-01	TCGA-CN-6994	IV	Advanced	TCGA-CN-A6UY-01	TCGA-CN-A6UY	IV	Advanced	TCGA-CQ-5326-01	TCGA-CQ-5326	IV	Advanced
TCGA-CN-6995-01	TCGA-CN-6995	IV	Advanced	TCGA-CN-A6V3-01	TCGA-CN-A6V3	IV	Advanced	TCGA-CQ-5327-01	TCGA-CQ-5327	IV	Advanced
TCGA-CN-6996-01	TCGA-CN-6996	IV	Advanced	TCGA-CN-A6V6-01	TCGA-CN-A6V6	IV	Advanced	TCGA-CQ-5330-01	TCGA-CQ-5330	IV	Advanced
TCGA-CN-6997-01	TCGA-CN-6997	IV	Advanced	TCGA-CN-A6V7-01	TCGA-CN-A6V7	IV	Advanced	TCGA-CQ-5334-01	TCGA-CQ-5334	IV	Advanced
TCGA-CN-6998-01	TCGA-CN-6998	IV	Advanced	TCGA-CQ-5326-01	TCGA-CQ-5326	IV	Advanced	TCGA-CQ-6218-01	TCGA-CQ-6218	IV	Advanced
TCGA-CN-A49A-01	TCGA-CN-A49A	IV	Advanced	TCGA-CQ-5327-01	TCGA-CQ-5327	IV	Advanced	TCGA-CQ-6219-01	TCGA-CQ-6219	IV	Advanced
TCGA-CN-A63T-01	TCGA-CN-A63T	IV	Advanced	TCGA-CQ-5330-01	TCGA-CQ-5330	IV	Advanced	TCGA-CQ-6222-01	TCGA-CQ-6222	IV	Advanced
TCGA-CN-A63U-01	TCGA-CN-A63U	IV	Advanced	TCGA-CQ-5334-01	TCGA-CQ-5334	IV	Advanced	TCGA-CQ-6224-01	TCGA-CQ-6224	IV	Advanced
TCGA-CN-A63V-01	TCGA-CN-A63V	IV	Advanced	TCGA-CQ-6218-01	TCGA-CQ-6218	IV	Advanced	TCGA-CQ-6227-01	TCGA-CQ-6227	IV	Advanced
TCGA-CN-A63W-01	TCGA-CN-A63W	IV	Advanced	TCGA-CQ-6219-01	TCGA-CQ-6219	IV	Advanced	TCGA-CQ-6228-01	TCGA-CQ-6228	IV	Advanced
TCGA-CN-A640-01	TCGA-CN-A640	IV	Advanced	TCGA-CQ-6222-01	TCGA-CQ-6222	IV	Advanced	TCGA-CQ-A4CD-01	TCGA-CQ-A4CD	IV	Advanced
TCGA-CN-A641-01	TCGA-CN-A641	IV	Advanced	TCGA-CQ-6224-01	TCGA-CQ-6224	IV	Advanced	TCGA-CR-6471-01	TCGA-CR-6471	IV	Advanced
TCGA-CN-A642-01	TCGA-CN-A642	IV	Advanced	TCGA-CQ-6227-01	TCGA-CQ-6227	IV	Advanced	TCGA-CR-6474-01	TCGA-CR-6474	IV	Advanced
TCGA-CN-A6UY-01	TCGA-CN-A6UY	IV	Advanced	TCGA-CQ-6228-01	TCGA-CQ-6228	IV	Advanced	TCGA-CR-6484-01	TCGA-CR-6484	IV	Advanced
TCGA-CN-A6V1-01	TCGA-CN-A6V1	IV	Advanced	TCGA-CQ-A4CD-01	TCGA-CQ-A4CD	IV	Advanced	TCGA-CR-6491-01	TCGA-CR-6491	IV	Advanced
TCGA-CN-A6V3-01	TCGA-CN-A6V3	IV	Advanced	TCGA-CR-6471-01	TCGA-CR-6471	IV	Advanced	TCGA-CR-6493-01	TCGA-CR-6493	IV	Advanced
TCGA-CN-A6V6-01	TCGA-CN-A6V6	IV	Advanced	TCGA-CR-6474-01	TCGA-CR-6474	IV	Advanced	TCGA-CR-7365-01	TCGA-CR-7365	IV	Advanced
TCGA-CN-A6V7-01	TCGA-CN-A6V7	IV	Advanced	TCGA-CR-6484-01	TCGA-CR-6484	IV	Advanced	TCGA-CR-7367-01	TCGA-CR-7367	IV	Advanced
TCGA-CQ-5326-01	TCGA-CQ-5326	IV	Advanced	TCGA-CR-6491-01	TCGA-CR-6491	IV	Advanced	TCGA-CR-7368-01	TCGA-CR-7368	IV	Advanced
TCGA-CQ-5327-01	TCGA-CQ-5327	IV	Advanced	TCGA-CR-6493-01	TCGA-CR-6493	IV	Advanced	TCGA-CR-7369-01	TCGA-CR-7369	IV	Advanced
TCGA-CQ-5330-01	TCGA-CQ-5330	IV	Advanced	TCGA-CR-7365-01	TCGA-CR-7365	IV	Advanced	TCGA-CR-7373-01	TCGA-CR-7373	IV	Advanced
TCGA-CQ-5334-01	TCGA-CQ-5334	IV	Advanced	TCGA-CR-7367-01	TCGA-CR-7367	IV	Advanced	TCGA-CR-7377-01	TCGA-CR-7377	IV	Advanced
TCGA-CQ-6218-01	TCGA-CQ-6218	IV	Advanced	TCGA-CR-7368-01	TCGA-CR-7368	IV	Advanced	TCGA-CR-7379-01	TCGA-CR-7379	IV	Advanced
TCGA-CQ-6219-01	TCGA-CQ-6219	IV	Advanced	TCGA-CR-7369-01	TCGA-CR-7369	IV	Advanced	TCGA-CR-7380-01	TCGA-CR-7380	IV	Advanced
TCGA-CQ-6222-01	TCGA-CQ-6222	IV	Advanced	TCGA-CR-7373-01	TCGA-CR-7373	IV	Advanced	TCGA-CR-7382-01	TCGA-CR-7382	IV	Advanced
TCGA-CQ-6224-01	TCGA-CQ-6224	IV	Advanced	TCGA-CR-7377-01	TCGA-CR-7377	IV	Advanced	TCGA-CR-7386-01	TCGA-CR-7386	IV	Advanced
TCGA-CQ-6227-01	TCGA-CQ-6227	IV	Advanced	TCGA-CR-7379-01	TCGA-CR-7379	IV	Advanced	TCGA-CR-7390-01	TCGA-CR-7390	IV	Advanced
TCGA-CQ-6228-01	TCGA-CQ-6228	IV	Advanced	TCGA-CR-7380-01	TCGA-CR-7380	IV	Advanced	TCGA-CR-7392-01	TCGA-CR-7392	IV	Advanced
TCGA-CQ-A4CD-01	TCGA-CQ-A4CD	IV	Advanced	TCGA-CR-7382-01	TCGA-CR-7382	IV	Advanced	TCGA-CR-7394-01	TCGA-CR-7394	IV	Advanced
TCGA-CR-6471-01	TCGA-CR-6471	IV	Advanced	TCGA-CR-7386-01	TCGA-CR-7386	IV	Advanced	TCGA-CR-7397-01	TCGA-CR-7397	IV	Advanced
TCGA-CR-6474-01	TCGA-CR-6474	IV	Advanced	TCGA-CR-7390-01	TCGA-CR-7390	IV	Advanced	TCGA-CR-7399-01	TCGA-CR-7399	IV	Advanced
TCGA-CR-6484-01	TCGA-CR-6484	IV	Advanced	TCGA-CR-7392-01	TCGA-CR-7392	IV	Advanced	TCGA-CV-5430-01	TCGA-CV-5430	IV	Advanced
TCGA-CR-6491-01	TCGA-CR-6491	IV	Advanced	TCGA-CR-7394-01	TCGA-CR-7394	IV	Advanced	TCGA-CV-5431-01	TCGA-CV-5431	IV	Advanced
TCGA-CR-6493-01	TCGA-CR-6493	IV	Advanced	TCGA-CR-7397-01	TCGA-CR-7397	IV	Advanced	TCGA-CV-5434-01	TCGA-CV-5434	IV	Advanced
TCGA-CR-7365-01	TCGA-CR-7365	IV	Advanced	TCGA-CR-7399-01	TCGA-CR-7399	IV	Advanced	TCGA-CV-5435-01	TCGA-CV-5435	IV	Advanced
TCGA-CR-7367-01	TCGA-CR-7367	IV	Advanced	TCGA-CV-5430-01	TCGA-CV-5430	IV	Advanced	TCGA-CV-5436-01	TCGA-CV-5436	IV	Advanced
TCGA-CR-7368-01	TCGA-CR-7368	IV	Advanced	TCGA-CV-5431-01	TCGA-CV-5431	IV	Advanced	TCGA-CV-5439-01	TCGA-CV-5439	IV	Advanced
TCGA-CR-7369-01	TCGA-CR-7369	IV	Advanced	TCGA-CV-5434-01	TCGA-CV-5434	IV	Advanced	TCGA-CV-5440-01	TCGA-CV-5440	IV	Advanced
TCGA-CR-7373-01	TCGA-CR-7373	IV	Advanced	TCGA-CV-5435-01	TCGA-CV-5435	IV	Advanced	TCGA-CV-5441-01	TCGA-CV-5441	IV	Advanced
TCGA-CR-7377-01	TCGA-CR-7377	IV	Advanced	TCGA-CV-5436-01	TCGA-CV-5436	IV	Advanced	TCGA-CV-5442-01	TCGA-CV-5442	IV	Advanced
TCGA-CR-7379-01	TCGA-CR-7379	IV	Advanced	TCGA-CV-5439-01	TCGA-CV-5439	IV	Advanced	TCGA-CV-5444-01	TCGA-CV-5444	IV	Advanced
TCGA-CR-7380-01	TCGA-CR-7380	IV	Advanced	TCGA-CV-5440-01	TCGA-CV-5440	IV	Advanced	TCGA-CV-5966-01	TCGA-CV-5966	IV	Advanced
TCGA-CR-7382-01	TCGA-CR-7382	IV	Advanced	TCGA-CV-5441-01	TCGA-CV-5441	IV	Advanced	TCGA-CV-5970-01	TCGA-CV-5970	IV	Advanced
TCGA-CR-7386-01	TCGA-CR-7386	IV	Advanced	TCGA-CV-5442-01	TCGA-CV-5442	IV	Advanced	TCGA-CV-5971-01	TCGA-CV-5971	IV	Advanced
TCGA-CR-7390-01	TCGA-CR-7390	IV	Advanced	TCGA-CV-5444-01	TCGA-CV-5444	IV	Advanced	TCGA-CV-5976-01	TCGA-CV-5976	IV	Advanced
TCGA-CR-7392-01	TCGA-CR-7392	IV	Advanced	TCGA-CV-5966-01	TCGA-CV-5966	IV	Advanced	TCGA-CV-5977-01	TCGA-CV-5977	IV	Advanced
TCGA-CR-7394-01	TCGA-CR-7394	IV	Advanced	TCGA-CV-5970-01	TCGA-CV-5970	IV	Advanced	TCGA-CV-5978-01	TCGA-CV-5978	IV	Advanced
TCGA-CR-7397-01	TCGA-CR-7397	IV	Advanced	TCGA-CV-5971-01	TCGA-CV-5971	IV	Advanced	TCGA-CV-5979-01	TCGA-CV-5979	IV	Advanced
TCGA-CR-7399-01	TCGA-CR-7399	IV	Advanced	TCGA-CV-5976-01	TCGA-CV-5976	IV	Advanced	TCGA-CV-6436-01	TCGA-CV-6436	IV	Advanced
TCGA-CV-5430-01	TCGA-CV-5430	IV	Advanced	TCGA-CV-5977-01	TCGA-CV-5977	IV	Advanced	TCGA-CV-6934-01	TCGA-CV-6934	IV	Advanced
TCGA-CV-5431-01	TCGA-CV-5431	IV	Advanced	TCGA-CV-5978-01	TCGA-CV-5978	IV	Advanced	TCGA-CV-6935-01	TCGA-CV-6935	IV	Advanced
TCGA-CV-5434-01	TCGA-CV-5434	IV	Advanced	TCGA-CV-5979-01	TCGA-CV-5979	IV	Advanced	TCGA-CV-6936-01	TCGA-CV-6936	IV	Advanced
TCGA-CV-5435-01	TCGA-CV-5435	IV	Advanced	TCGA-CV-6436-01	TCGA-CV-6436	IV	Advanced	TCGA-CV-6939-01	TCGA-CV-6939	IV	Advanced
TCGA-CV-5436-01	TCGA-CV-5436	IV	Advanced	TCGA-CV-6934-01	TCGA-CV-6934	IV	Advanced	TCGA-CV-6945-01	TCGA-CV-6945	IV	Advanced
TCGA-CV-5439-01	TCGA-CV-5439	IV	Advanced	TCGA-CV-6935-01	TCGA-CV-6935	IV	Advanced	TCGA-CV-6948-01	TCGA-CV-6948	IV	Advanced
TCGA-CV-5440-01	TCGA-CV-5440	IV	Advanced	TCGA-CV-6936-01	TCGA-CV-6936	IV	Advanced	TCGA-CV-6950-01	TCGA-CV-6950	IV	Advanced
TCGA-CV-5441-01	TCGA-CV-5441	IV	Advanced	TCGA-CV-6939-01	TCGA-CV-6939	IV	Advanced	TCGA-CV-6951-01	TCGA-CV-6951	IV	Advanced
TCGA-CV-5442-01	TCGA-CV-5442	IV	Advanced	TCGA-CV-6945-01	TCGA-CV-6945	IV	Advanced	TCGA-CV-6952-01	TCGA-CV-6952	IV	Advanced
TCGA-CV-5444-01	TCGA-CV-5444	IV	Advanced	TCGA-CV-6948-01	TCGA-CV-6948	IV	Advanced	TCGA-CV-6954-01	TCGA-CV-6954	IV	Advanced
TCGA-CV-5966-01	TCGA-CV-5966	IV	Advanced	TCGA-CV-6950-01	TCGA-CV-6950	IV	Advanced	TCGA-CV-6962-01	TCGA-CV-6962	IV	Advanced
TCGA-CV-5970-01	TCGA-CV-5970	IV	Advanced	TCGA-CV-6951-01	TCGA-CV-6951	IV	Advanced	TCGA-CV-7089-01	TCGA-CV-7089	IV	Advanced
TCGA-CV-5971-01	TCGA-CV-5971	IV	Advanced	TCGA-CV-6952-01	TCGA-CV-6952	IV	Advanced	TCGA-CV-7102-01	TCGA-CV-7102	IV	Advanced
TCGA-CV-5976-01	TCGA-CV-5976	IV	Advanced	TCGA-CV-6954-01	TCGA-CV-6954	IV	Advanced	TCGA-CV-7103-01	TCGA-CV-7103	IV	Advanced
TCGA-CV-5977-01	TCGA-CV-5977	IV	Advanced	TCGA-CV-6962-01	TCGA-CV-6962	IV	Advanced	TCGA-CV-7104-01	TCGA-CV-7104	IV	Advanced
TCGA-CV-5978-01	TCGA-CV-5978	IV	Advanced	TCGA-CV-7089-01	TCGA-CV-7089	IV	Advanced	TCGA-CV-7178-01	TCGA-CV-7178	IV	Advanced
TCGA-CV-5979-01	TCGA-CV-5979	IV	Advanced	TCGA-CV-7102-01	TCGA-CV-7102	IV	Advanced	TCGA-CV-7236-01	TCGA-CV-7236	IV	Advanced
TCGA-CV-6436-01	TCGA-CV-6436	IV	Advanced	TCGA-CV-7103-01	TCGA-CV-7103	IV	Advanced	TCGA-CV-7245-01	TCGA-CV-7245	IV	Advanced
TCGA-CV-6934-01	TCGA-CV-6934	IV	Advanced	TCGA-CV-7104-01	TCGA-CV-7104	IV	Advanced	TCGA-CV-7248-01	TCGA-CV-7248	IV	Advanced
TCGA-CV-6935-01	TCGA-CV-6935	IV	Advanced	TCGA-CV-7178-01	TCGA-CV-7178	IV	Advanced	TCGA-CV-7250-01	TCGA-CV-7250	IV	Advanced
TCGA-CV-6936-01	TCGA-CV-6936	IV	Advanced	TCGA-CV-7236-01	TCGA-CV-7236	IV	Advanced	TCGA-CV-7252-01	TCGA-CV-7252	IV	Advanced
TCGA-CV-6939-01	TCGA-CV-6939	IV	Advanced	TCGA-CV-7245-01	TCGA-CV-7245	IV	Advanced	TCGA-CV-7253-01	TCGA-CV-7253	IV	Advanced
TCGA-CV-6945-01	TCGA-CV-6945	IV	Advanced	TCGA-CV-7248-01	TCGA-CV-7248	IV	Advanced	TCGA-CV-7255-01	TCGA-CV-7255	IV	Advanced
TCGA-CV-6948-01	TCGA-CV-6948	IV	Advanced	TCGA-CV-7250-01	TCGA-CV-7250	IV	Advanced	TCGA-CV-7261-01	TCGA-CV-7261	IV	Advanced
TCGA-CV-6950-01	TCGA-CV-6950	IV	Advanced	TCGA-CV-7252-01	TCGA-CV-7252	IV	Advanced	TCGA-CV-7411-01	TCGA-CV-7	IV	Advanced
TCGA-CV-6951-01	TCGA-CV-6951	IV	Advanced	TCGA-CV-7253-01	TCGA-CV-7253	IV	Advanced	TCGA-CV-7414-01	TCGA-CV-7414	IV	Advanced
TCGA-CV-6952-01	TCGA-CV-6952	IV	Advanced	TCGA-CV-7255-01	TCGA-CV-7255	IV	Advanced	TCGA-CV-7415-01	TCGA-CV-7415	IV	Advanced
TCGA-CV-6954-01	TCGA-CV-6954	IV	Advanced	TCGA-CV-7261-01	TCGA-CV-7261	IV	Advanced	TCGA-CV-7416-01	TCGA-CV-7416	IV	Advanced
TCGA-CV-6962-01	TCGA-CV-6962	IV	Advanced	TCGA-CV-7411-01	TCGA-CV-7411	IV	Advanced	TCGA-CV-7418-01	TCGA-CV-7418	IV	Advanced
TCGA-CV-7089-01	TCGA-CV-7089	IV	Advanced	TCGA-CV-7414-01	TCGA-CV-7414	IV	Advanced	TCGA-CV-7421-01	TCGA-CV-7421	IV	Advanced
TCGA-CV-7102-01	TCGA-CV-7102	IV	Advanced	TCGA-CV-7415-01	TCGA-CV-7415	IV	Advanced	TCGA-CV-7422-01	TCGA-CV-7422	IV	Advanced
TCGA-CV-7103-01	TCGA-CV-7103	IV	Advanced	TCGA-CV-7416-01	TCGA-CV-7416	IV	Advanced	TCGA-CV-7424-01	TCGA-CV-7424	IV	Advanced
TCGA-CV-7104-01	TCGA-CV-7104	IV	Advanced	TCGA-CV-7418-01	TCGA-CV-7418	IV	Advanced	TCGA-CV-7428-01	TCGA-CV-7428	IV	Advanced
TCGA-CV-7178-01	TCGA-CV-7178	IV	Advanced	TCGA-CV-7421-01	TCGA-CV-7421	IV	Advanced	TCGA-CV-7429-01	TCGA-CV-7429	IV	Advanced
TCGA-CV-7236-01	TCGA-CV-7236	IV	Advanced	TCGA-CV-7422-01	TCGA-CV-7422	IV	Advanced	TCGA-CV-7430-01	TCGA-CV-7430	IV	Advanced
TCGA-CV-7245-01	TCGA-CV-7245	IV	Advanced	TCGA-CV-7424-01	TCGA-CV-7424	IV	Advanced	TCGA-CV-7433-01	TCGA-CV-7433	IV	Advanced
TCGA-CV-7248-01	TCGA-CV-7248	IV	Advanced	TCGA-CV-7428-01	TCGA-CV-7428	IV	Advanced	TCGA-CV-7434-01	TCGA-CV-7434	IV	Advanced
TCGA-CV-7250-01	TCGA-CV-7250	IV	Advanced	TCGA-CV-7429-01	TCGA-CV-7429	IV	Advanced	TCGA-CV-7435-01	TCGA-CV-7435	IV	Advanced
TCGA-CV-7252-01	TCGA-CV-7252	IV	Advanced	TCGA-CV-7430-01	TCGA-CV-7430	IV	Advanced	TCGA-CV-7446-01	TCGA-CV-7446	IV	Advanced
TCGA-CV-7253-01	TCGA-CV-7253	IV	Advanced	TCGA-CV-7433-01	TCGA-CV-7433	IV	Advanced	TCGA-CV-7568-01	TCGA-CV-7568	IV	Advanced
TCGA-CV-7255-01	TCGA-CV-7255	IV	Advanced	TCGA-CV-7434-01	TCGA-CV-7434	IV	Advanced	TCGA-CV-A45U-01	TCGA-CV-A45U	IV	Advanced
TCGA-CV-7261-01	TCGA-CV-7261	IV	Advanced	TCGA-CV-7435-01	TCGA-CV-7435	IV	Advanced	TCGA-CV-A45V-01	TCGA-CV-A45V	IV	Advanced
TCGA-CV-7409-01	TCGA-CV-7409	IV	Advanced	TCGA-CV-7446-01	TCGA-CV-7446	IV	Advanced	TCGA-CV-A45X-01	TCGA-CV-A45X	IV	Advanced
TCGA-CV-7411-01	TCGA-CV-7411	IV	Advanced	TCGA-CV-7568-01	TCGA-CV-7568	IV	Advanced	TCGA-CV-A45Y-01	TCGA-CV-A45Y	IV	Advanced
TCGA-CV-7414-01	TCGA-CV-7414	IV	Advanced	TCGA-CV-A45U-01	TCGA-CV-A45U	IV	Advanced	TCGA-CV-A463-01	TCGA-CV-A463	IV	Advanced
TCGA-CV-7415-01	TCGA-CV-7415	IV	Advanced	TCGA-CV-A45V-01	TCGA-CV-A45V	IV	Advanced	TCGA-CV-A468-01	TCGA-CV-A468	IV	Advanced
TCGA-CV-7416-01	TCGA-CV-7416	IV	Advanced	TCGA-CV-A45X-01	TCGA-CV-A45X	IV	Advanced	TCGA-CV-A6JO-01	TCGA-CV-A6JO	IV	Advanced
TCGA-CV-7418-01	TCGA-CV-7418	IV	Advanced	TCGA-CV-A45Y-01	TCGA-CV-A45Y	IV	Advanced	TCGA-CV-A6JU-01	TCGA-CV-A6JU	IV	Advanced
TCGA-CV-7421-01	TCGA-CV-7421	IV	Advanced	TCGA-CV-A463-01	TCGA-CV-A463	IV	Advanced	TCGA-CV-A6JY-01	TCGA-CV-A6JY	IV	Advanced
TCGA-CV-7422-01	TCGA-CV-7422	IV	Advanced	TCGA-CV-A468-01	TCGA-CV-A468	IV	Advanced	TCGA-CV-A6K1-01	TCGA-CV-A6K1	IV	Advanced
TCGA-CV-7424-01	TCGA-CV-7424	IV	Advanced	TCGA-CV-A6JO-01	TCGA-CV-A6JO	IV	Advanced	TCGA-CV-A6K2-01	TCGA-CV-A6K2	IV	Advanced
TCGA-CV-7428-01	TCGA-CV-7428	IV	Advanced	TCGA-CV-A6JU-01	TCGA-CV-A6JU	IV	Advanced	TCGA-CX-7082-01	TCGA-CX-7082	IV	Advanced
TCGA-CV-7429-01	TCGA-CV-7429	IV	Advanced	TCGA-CV-A6JY-01	TCGA-CV-A6JY	IV	Advanced	TCGA-CX-7219-01	TCGA-CX-7219	IV	Advanced
TCGA-CV-7430-01	TCGA-CV-7430	IV	Advanced	TCGA-CV-A6K1-01	TCGA-CV-A6K1	IV	Advanced	TCGA-CX-A4AQ-01	TCGA-CX-A4AQ	IV	Advanced
TCGA-CV-7433-01	TCGA-CV-7433	IV	Advanced	TCGA-CV-A6K2-01	TCGA-CV-A6K2	IV	Advanced	TCGA-D6-6824-01	TCGA-D6-6824	IV	Advanced
TCGA-CV-7434-01	TCGA-CV-7434	IV	Advanced	TCGA-CX-7082-01	TCGA-CX-7082	IV	Advanced	TCGA-D6-6826-01	TCGA-D6-6826	IV	Advanced
TCGA-CV-7435-01	TCGA-CV-7435	IV	Advanced	TCGA-CX-7219-01	TCGA-CX-7219	IV	Advanced	TCGA-D6-A4Z9-01	TCGA-D6-A4Z9	IV	Advanced
TCGA-CV-7446-01	TCGA-CV-7446	IV	Advanced	TCGA-CX-A4AQ-01	TCGA-CX-A4AQ	IV	Advanced	TCGA-D6-A6EO-01	TCGA-D6-A6EO	IV	Advanced
TCGA-CV-7568-01	TCGA-CV-7568	IV	Advanced	TCGA-D6-6824-01	TCGA-D6-6824	IV	Advanced	TCGA-D6-A6EQ-01	TCGA-D6-A6EQ	IV	Advanced
TCGA-CV-A45U-01	TCGA-CV-A45U	IV	Advanced	TCGA-D6-6826-01	TCGA-D6-6826	IV	Advanced	TCGA-D6-A6ES-01	TCGA-D6-A6ES	IV	Advanced
TCGA-CV-A45V-01	TCGA-CV-A45V	IV	Advanced	TCGA-D6-A4Z9-01	TCGA-D6-A4Z9	IV	Advanced	TCGA-D6-A74Q-01	TCGA-D6-A74Q	IV	Advanced
TCGA-CV-A45X-01	TCGA-CV-A45X	IV	Advanced	TCGA-D6-A6EO-01	TCGA-D6-A6EO	IV	Advanced	TCGA-F7-7848-01	TCGA-F7-7848	IV	Advanced
TCGA-CV-A45Y-01	TCGA-CV-A45Y	IV	Advanced	TCGA-D6-A6EQ-01	TCGA-D6-A6EQ	IV	Advanced	TCGA-F7-A50I-01	TCGA-F7-A50I	IV	Advanced
TCGA-CV-A463-01	TCGA-CV-A463	IV	Advanced	TCGA-D6-A6ES-01	TCGA-D6-A6ES	IV	Advanced	TCGA-F7-A61W-01	TCGA-F7-A61W	IV	Advanced
TCGA-CV-A468-01	TCGA-CV-A468	IV	Advanced	TCGA-D6-A74Q-01	TCGA-D6-A74Q	IV	Advanced	TCGA-F7-A623-01	TCGA-F7-A623	IV	Advanced
TCGA-CV-A6JO-01	TCGA-CV-A6JO	IV	Advanced	TCGA-F7-7848-01	TCGA-F7-7848	IV	Advanced	TCGA-H7-7774-01	TCGA-H7-7774	IV	Advanced
TCGA-CV-A6JU-01	TCGA-CV-A6JU	IV	Advanced	TCGA-F7-A50I-01	TCGA-F7-A50I	IV	Advanced	TCGA-H7-8501-01	TCGA-H7-8501	IV	Advanced
TCGA-CV-A6JY-01	TCGA-CV-A6JY	IV	Advanced	TCGA-F7-A61W-01	TCGA-F7-A61W	IV	Advanced	TCGA-H7-8502-01	TCGA-H7-8502	IV	Advanced
TCGA-CV-A6K1-01	TCGA-CV-A6K1	IV	Advanced	TCGA-F7-A623-01	TCGA-F7-A623	IV	Advanced	TCGA-H7-A6C4-01	TCGA-H7-A6C4	IV	Advanced
TCGA-CV-A6K2-01	TCGA-CV-A6K2	IV	Advanced	TCGA-H7-7774-01	TCGA-H7-7774	IV	Advanced	TCGA-HD-7229-01	TCGA-HD-7229	IV	Advanced
TCGA-CX-7082-01	TCGA-CX-7082	IV	Advanced	TCGA-H7-8501-01	TCGA-H7-8501	IV	Advanced	TCGA-HD-7754-01	TCGA-HD-7754	IV	Advanced
TCGA-CX-7219-01	TCGA-CX-7219	IV	Advanced	TCGA-H7-8502-01	TCGA-H7-8502	IV	Advanced	TCGA-HD-7831-01	TCGA-HD-7831	IV	Advanced
TCGA-CX-A4AQ-01	TCGA-CX-A4AQ	IV	Advanced	TCGA-H7-A6C4-01	TCGA-H7-A6C4	IV	Advanced	TCGA-HD-7832-01	TCGA-HD-7832	IV	Advanced
TCGA-D6-6824-01	TCGA-D6-6824	IV	Advanced	TCGA-HD-7229-01	TCGA-HD-7229	IV	Advanced	TCGA-HD-8224-01	TCGA-HD-8224	IV	Advanced
TCGA-D6-6826-01	TCGA-D6-6826	IV	Advanced	TCGA-HD-7754-01	TCGA-HD-7754	IV	Advanced	TCGA-HD-A4C1-01	TCGA-HD-A4C1	IV	Advanced
TCGA-D6-A4Z9-01	TCGA-D6-A4Z9	IV	Advanced	TCGA-HD-7831-01	TCGA-HD-7831	IV	Advanced	TCGA-HD-A633-01	TCGA-HD-A633	IV	Advanced
TCGA-D6-A6EO-01	TCGA-D6-A6EO	IV	Advanced	TCGA-HD-7832-01	TCGA-HD-7832	IV	Advanced	TCGA-HD-A634-01	TCGA-HD-A634	IV	Advanced
TCGA-D6-A6EQ-01	TCGA-D6-A6EQ	IV	Advanced	TCGA-HD-8224-01	TCGA-HD-8224	IV	Advanced	TCGA-HD-A6I0-01	TCGA-HD-A6I0	IV	Advanced
TCGA-D6-A6ES-01	TCGA-D6-A6ES	IV	Advanced	TCGA-HD-A4C1-01	TCGA-HD-A4C1	IV	Advanced	TCGA-IQ-7632-01	TCGA-IQ-7632	IV	Advanced
TCGA-D6-A74Q-01	TCGA-D6-A74Q	IV	Advanced	TCGA-HD-A633-01	TCGA-HD-A633	IV	Advanced	TCGA-IQ-A61G-01	TCGA-IQ-A61G	IV	Advanced
TCGA-F7-7848-01	TCGA-F7-7848	IV	Advanced	TCGA-HD-A634-01	TCGA-HD-A634	IV	Advanced	TCGA-IQ-A61I-01	TCGA-IQ-A61I	IV	Advanced
TCGA-F7-A50I-01	TCGA-F7-A50I	IV	Advanced	TCGA-HD-A6I0-01	TCGA-HD-A6I0	IV	Advanced	TCGA-IQ-A61J-01	TCGA-IQ-A61J	IV	Advanced
TCGA-F7-A61W-01	TCGA-F7-A61W	IV	Advanced	TCGA-IQ-7632-01	TCGA-IQ-7632	IV	Advanced	TCGA-IQ-A61O-01	TCGA-IQ-A61O	IV	Advanced
TCGA-F7-A623-01	TCGA-F7-A623	IV	Advanced	TCGA-IQ-A61G-01	TCGA-IQ-A61G	IV	Advanced	TCGA-KU-A66T-01	TCGA-KU-A66T	IV	Advanced
TCGA-H7-7774-01	TCGA-H7-7774	IV	Advanced	TCGA-IQ-A61I-01	TCGA-IQ-A61I	IV	Advanced	TCGA-KU-A6H7-01	TCGA-KU-A6H7	IV	Advanced
TCGA-H7-8501-01	TCGA-H7-8501	IV	Advanced	TCGA-IQ-A61J-01	TCGA-IQ-A61J	IV	Advanced	TCGA-KU-A6H8-01	TCGA-KU-A6H8	IV	Advanced
TCGA-H7-8502-01	TCGA-H7-8502	IV	Advanced	TCGA-IQ-A61O-01	TCGA-IQ-A61O	IV	Advanced	TCGA-MT-A51X-01	TCGA-MT-A51X	IV	Advanced
TCGA-H7-A6C4-01	TCGA-H7-A6C4	IV	Advanced	TCGA-KU-A66T-01	TCGA-KU-A66T	IV	Advanced	TCGA-MT-A67F-01	TCGA-MT-A67F	IV	Advanced
TCGA-HD-7229-01	TCGA-HD-7229	IV	Advanced	TCGA-KU-A6H7-01	TCGA-KU-A6H7	IV	Advanced	TCGA-MT-A7BN-01	TCGA-MT-A7BN	IV	Advanced
TCGA-HD-7754-01	TCGA-HD-7754	IV	Advanced	TCGA-KU-A6H8-01	TCGA-KU-A6H8	IV	Advanced	TCGA-MZ-A7D7-01	TCGA-MZ-A7D7	IV	Advanced
TCGA-HD-7831-01	TCGA-HD-7831	IV	Advanced	TCGA-MT-A51X-01	TCGA-MT-A51X	IV	Advanced	TCGA-P3-A5Q5-01	TCGA-P3-A5Q5	IV	Advanced
TCGA-HD-7832-01	TCGA-HD-7832	IV	Advanced	TCGA-MT-A67F-01	TCGA-MT-A67F	IV	Advanced	TCGA-P3-A5Q6-01	TCGA-P3-A5Q6	IV	Advanced
TCGA-HD-8224-01	TCGA-HD-8224	IV	Advanced	TCGA-MT-A7BN-01	TCGA-MT-A7BN	IV	Advanced	TCGA-P3-A5QF-01	TCGA-P3-A5QF	IV	Advanced
TCGA-HD-A4C1-01	TCGA-HD-A4C1	IV	Advanced	TCGA-MZ-A7D7-01	TCGA-MZ-A7D7	IV	Advanced	TCGA-P3-A6SW-01	TCGA-P3-A6SW	IV	Advanced
TCGA-HD-A633-01	TCGA-HD-A633	IV	Advanced	TCGA-P3-A5Q5-01	TCGA-P3-A5Q5	IV	Advanced	TCGA-P3-A6T0-01	TCGA-P3-A6T0	IV	Advanced
TCGA-HD-A634-01	TCGA-HD-A634	IV	Advanced	TCGA-P3-A5Q6-01	TCGA-P3-A5Q6	IV	Advanced	TCGA-P3-A6T2-01	TCGA-P3-A6T2	IV	Advanced
TCGA-HD-A6I0-01	TCGA-HD-A6I0	IV	Advanced	TCGA-P3-A5QF-01	TCGA-P3-A5QF	IV	Advanced	TCGA-P3-A6T3-01	TCGA-P3-A6T3	IV	Advanced
TCGA-IQ-7632-01	TCGA-IQ-7632	IV	Advanced	TCGA-P3-A6SW-01	TCGA-P3-A6SW	IV	Advanced	TCGA-P3-A6T4-01	TCGA-P3-A6T4	IV	Advanced
TCGA-IQ-A61G-01	TCGA-IQ-A61G	IV	Advanced	TCGA-P3-A6T0-01	TCGA-P3-A6T0	IV	Advanced	TCGA-P3-A6T5-01	TCGA-P3-A6T5	IV	Advanced
TCGA-IQ-A61I-01	TCGA-IQ-A61I	IV	Advanced	TCGA-P3-A6T2-01	TCGA-P3-A6T2	IV	Advanced	TCGA-P3-A6T6-01	TCGA-P3-A6T6	IV	Advanced
TCGA-IQ-A61J-01	TCGA-IQ-A61J	IV	Advanced	TCGA-P3-A6T3-01	TCGA-P3-A6T3	IV	Advanced	TCGA-P3-A6T7-01	TCGA-P3-A6T7	IV	Advanced
TCGA-IQ-A61K-01	TCGA-IQ-A61K	IV	Advanced	TCGA-P3-A6T4-01	TCGA-P3-A6T4	IV	Advanced	TCGA-P3-A6T8-01	TCGA-P3-A6T8	IV	Advanced
TCGA-IQ-A61O-01	TCGA-IQ-A61O	IV	Advanced	TCGA-P3-A6T5-01	TCGA-P3-A6T5	IV	Advanced	TCGA-QK-A64Z-01	TCGA-QK-A64Z	IV	Advanced
TCGA-KU-A66T-01	TCGA-KU-A66T	IV	Advanced	TCGA-P3-A6T6-01	TCGA-P3-A6T6	IV	Advanced	TCGA-QK-A6IH-01	TCGA-QK-A6IH	IV	Advanced
TCGA-KU-A6H7-01	TCGA-KU-A6H7	IV	Advanced	TCGA-P3-A6T7-01	TCGA-P3-A6T7	IV	Advanced	TCGA-QK-A6II-01	TCGA-QK-A6II	IV	Advanced
TCGA-KU-A6H8-01	TCGA-KU-A6H8	IV	Advanced	TCGA-P3-A6T8-01	TCGA-P3-A6T8	IV	Advanced	TCGA-QK-A6VB-01	TCGA-QK-A6VB	IV	Advanced
TCGA-MT-A51X-01	TCGA-MT-A51X	IV	Advanced	TCGA-QK-A64Z-01	TCGA-QK-A64Z	IV	Advanced	TCGA-QK-A6VC-01	TCGA-QK-A6VC	IV	Advanced
TCGA-MT-A67F-01	TCGA-MT-A67F	IV	Advanced	TCGA-QK-A6IH-01	TCGA-QK-A6IH	IV	Advanced	TCGA-QK-A8Z7-01	TCGA-QK-A8Z7	IV	Advanced
TCGA-MT-A67G-01	TCGA-MT-A67G	IV	Advanced	TCGA-QK-A6II-01	TCGA-QK-A6II	IV	Advanced	TCGA-QK-A8Z8-01	TCGA-QK-A8Z8	IV	Advanced
TCGA-MT-A7BN-01	TCGA-MT-A7BN	IV	Advanced	TCGA-QK-A6VB-01	TCGA-QK-A6VB	IV	Advanced	TCGA-QK-A8Z9-01	TCGA-QK-A8Z9	IV	Advanced
TCGA-MZ-A7D7-01	TCGA-MZ-A7D7	IV	Advanced	TCGA-QK-A6VC-01	TCGA-QK-A6VC	IV	Advanced	TCGA-QK-A8ZB-01	TCGA-QK-A8ZB	IV	Advanced
TCGA-P3-A5Q5-01	TCGA-P3-A5Q5	IV	Advanced	TCGA-QK-A8Z7-01	TCGA-QK-A8Z7	IV	Advanced	TCGA-QK-AA3K-01	TCGA-QK-AA3K	IV	Advanced
TCGA-P3-A5Q6-01	TCGA-P3-A5Q6	IV	Advanced	TCGA-QK-A8Z8-01	TCGA-QK-A8Z8	IV	Advanced	TCGA-RS-A6TO-01	TCGA-RS-A6TO	IV	Advanced
TCGA-P3-A5QF-01	TCGA-P3-A5QF	IV	Advanced	TCGA-QK-A8Z9-01	TCGA-QK-A8Z9	IV	Advanced	TCGA-T3-A92M-01	TCGA-T3-A92M	IV	Advanced
TCGA-P3-A6SW-01	TCGA-P3-A6SW	IV	Advanced	TCGA-QK-A8ZB-01	TCGA-QK-A8ZB	IV	Advanced	TCGA-T3-A92N-01	TCGA-T3-A92N	IV	Advanced
TCGA-P3-A6T0-01	TCGA-P3-A6T0	IV	Advanced	TCGA-QK-AA3K-01	TCGA-QK-AA3K	IV	Advanced	TCGA-TN-A7HI-01	TCGA-TN-A7HI	IV	Advanced
TCGA-P3-A6T2-01	TCGA-P3-A6T2	IV	Advanced	TCGA-RS-A6TO-01	TCGA-RS-A6TO	IV	Advanced	TCGA-TN-A7HJ-01	TCGA-TN-A7HJ	IV	Advanced
TCGA-P3-A6T3-01	TCGA-P3-A6T3	IV	Advanced	TCGA-T3-A92M-01	TCGA-T3-A92M	IV	Advanced	TCGA-TN-A7HL-01	TCGA-TN-A7HL	IV	Advanced
TCGA-P3-A6T4-01	TCGA-P3-A6T4	IV	Advanced	TCGA-T3-A92N-01	TCGA-T3-A92N	IV	Advanced	TCGA-UF-A718-01	TCGA-UF-A718	IV	Advanced
TCGA-P3-A6T5-01	TCGA-P3-A6T5	IV	Advanced	TCGA-TN-A7HI-01	TCGA-TN-A7HI	IV	Advanced	TCGA-UF-A71A-01	TCGA-UF-A71A	IV	Advanced
TCGA-P3-A6T6-01	TCGA-P3-A6T6	IV	Advanced	TCGA-TN-A7HJ-01	TCGA-TN-A7HJ	IV	Advanced	TCGA-UF-A71B-01	TCGA-UF-A71B	IV	Advanced
TCGA-P3-A6T7-01	TCGA-P3-A6T7	IV	Advanced	TCGA-TN-A7HL-01	TCGA-TN-A7HL	IV	Advanced	TCGA-UF-A71D-01	TCGA-UF-A71D	IV	Advanced
TCGA-P3-A6T8-01	TCGA-P3-A6T8	IV	Advanced	TCGA-UF-A718-01	TCGA-UF-A718	IV	Advanced	TCGA-UF-A71E-01	TCGA-UF-A71E	IV	Advanced
TCGA-QK-A64Z-01	TCGA-QK-A64Z	IV	Advanced	TCGA-UF-A71A-01	TCGA-UF-A71A	IV	Advanced	TCGA-UF-A7J9-01	TCGA-UF-A7J9	IV	Advanced
TCGA-QK-A6IH-01	TCGA-QK-A6IH	IV	Advanced	TCGA-UF-A71B-01	TCGA-UF-A71B	IV	Advanced	TCGA-UF-A7JA-01	TCGA-UF-A7JA	IV	Advanced
TCGA-QK-A6II-01	TCGA-QK-A6II	IV	Advanced	TCGA-UF-A71D-01	TCGA-UF-A71D	IV	Advanced	TCGA-UF-A7JC-01	TCGA-UF-A7JC	IV	Advanced
TCGA-QK-A6VB-01	TCGA-QK-A6VB	IV	Advanced	TCGA-UF-A71E-01	TCGA-UF-A71E	IV	Advanced	TCGA-UF-A7JD-01	TCGA-UF-A7JD	IV	Advanced
TCGA-QK-A6VC-01	TCGA-QK-A6VC	IV	Advanced	TCGA-UF-A7J9-01	TCGA-UF-A7J9	IV	Advanced	TCGA-UF-A7JF-01	TCGA-UF-A7JF	IV	Advanced
TCGA-QK-A8Z7-01	TCGA-QK-A8Z7	IV	Advanced	TCGA-UF-A7JA-01	TCGA-UF-A7JA	IV	Advanced	TCGA-UF-A7JH-01	TCGA-UF-A7JH	IV	Advanced
TCGA-QK-A8Z8-01	TCGA-QK-A8Z8	IV	Advanced	TCGA-UF-A7JC-01	TCGA-UF-A7JC	IV	Advanced	TCGA-UF-A7JJ-01	TCGA-UF-A7JJ	IV	Advanced
TCGA-QK-A8Z9-01	TCGA-QK-A8Z9	IV	Advanced	TCGA-UF-A7JD-01	TCGA-UF-A7JD	IV	Advanced	TCGA-UF-A7JK-01	TCGA-UF-A7JK	IV	Advanced
TCGA-QK-A8ZB-01	TCGA-QK-A8ZB	IV	Advanced	TCGA-UF-A7JF-01	TCGA-UF-A7JF	IV	Advanced	TCGA-UF-A7JO-01	TCGA-UF-A7JO	IV	Advanced
TCGA-QK-AA3K-01	TCGA-QK-AA3K	IV	Advanced	TCGA-UF-A7JH-01	TCGA-UF-A7JH	IV	Advanced	TCGA-UF-A7JS-01	TCGA-UF-A7JS	IV	Advanced
TCGA-RS-A6TO-01	TCGA-RS-A6TO	IV	Advanced	TCGA-UF-A7JJ-01	TCGA-UF-A7JJ	IV	Advanced	TCGA-UF-A7JT-01	TCGA-UF-A7JT	IV	Advanced
TCGA-T3-A92M-01	TCGA-T3-A92M	IV	Advanced	TCGA-UF-A7JK-01	TCGA-UF-A7JK	IV	Advanced	TCGA-UF-A7JV-01	TCGA-UF-A7JV	IV	Advanced
TCGA-T3-A92N-01	TCGA-T3-A92N	IV	Advanced	TCGA-UF-A7JO-01	TCGA-UF-A7JO	IV	Advanced	TCGA-BA-4076-01	TCGA-BA-4076	TNS	TNS
TCGA-TN-A7HI-01	TCGA-TN-A7HI	IV	Advanced	TCGA-UF-A7JS-01	TCGA-UF-A7JS	IV	Advanced	TCGA-BA-4078-01	TCGA-BA-4078	TNS	TNS
TCGA-TN-A7HJ-01	TCGA-TN-A7HJ	IV	Advanced	TCGA-UF-A7JT-01	TCGA-UF-A7JT	IV	Advanced	TCGA-BA-5153-01	TCGA-BA-5153	TNS	TNS
TCGA-TN-A7HL-01	TCGA-TN-A7HL	IV	Advanced	TCGA-UF-A7JV-01	TCGA-UF-A7JV	IV	Advanced	TCGA-BA-5558-01	TCGA-BA-5558	TNS	TNS
TCGA-UF-A718-01	TCGA-UF-A718	IV	Advanced	TCGA-BA-4076-01	TCGA-BA-4076	TNS	TNS	TCGA-BA-5559-01	TCGA-BA-5559	TNS	TNS
TCGA-UF-A71A-01	TCGA-UF-A71A	IV	Advanced	TCGA-BA-4078-01	TCGA-BA-4078	TNS	TNS	TCGA-BA-6868-01	TCGA-BA-6868	TNS	TNS
TCGA-UF-A71B-01	TCGA-UF-A71B	IV	Advanced	TCGA-BA-5153-01	TCGA-BA-5153	TNS	TNS	TCGA-BA-6870-01	TCGA-BA-6870	TNS	TNS
TCGA-UF-A71D-01	TCGA-UF-A71D	IV	Advanced	TCGA-BA-5558-01	TCGA-BA-5558	TNS	TNS	TCGA-BA-6871-01	TCGA-BA-6871	TNS	TNS
TCGA-UF-A71E-01	TCGA-UF-A71E	IV	Advanced	TCGA-BA-5559-01	TCGA-BA-5559	TNS	TNS	TCGA-BA-6872-01	TCGA-BA-6872	TNS	TNS
TCGA-UF-A7J9-01	TCGA-UF-A7J9	IV	Advanced	TCGA-BA-6868-01	TCGA-BA-6868	TNS	TNS	TCGA-BA-A4IF-01	TCGA-BA-A4IF	TNS	TNS
TCGA-UF-A7JA-01	TCGA-UF-A7JA	IV	Advanced	TCGA-BA-6870-01	TCGA-BA-6870	TNS	TNS	TCGA-BA-A4IG-01	TCGA-BA-A4IG	TNS	TNS
TCGA-UF-A7JC-01	TCGA-UF-A7JC	IV	Advanced	TCGA-BA-6871-01	TCGA-BA-6871	TNS	TNS	TCGA-BA-A4IH-01	TCGA-BA-A4IH	TNS	TNS
TCGA-UF-A7JD-01	TCGA-UF-A7JD	IV	Advanced	TCGA-BA-6872-01	TCGA-BA-6872	TNS	TNS	TCGA-BA-A6DG-01	TCGA-BA-A6DG	TNS	TNS
TCGA-UF-A7JF-01	TCGA-UF-A7JF	IV	Advanced	TCGA-BA-A4IF-01	TCGA-BA-A4IF	TNS	TNS	TCGA-BA-A6DI-01	TCGA-BA-A6DI	TNS	TNS
TCGA-UF-A7JH-01	TCGA-UF-A7JH	IV	Advanced	TCGA-BA-A4IG-01	TCGA-BA-A4IG	TNS	TNS	TCGA-BA-A6DL-01	TCGA-BA-A6DL	TNS	TNS
TCGA-UF-A7JJ-01	TCGA-UF-A7JJ	IV	Advanced	TCGA-BA-A4IH-01	TCGA-BA-A4IH	TNS	TNS	TCGA-BB-4225-01	TCGA-BB-4225	TNS	TNS
TCGA-UF-A7JK-01	TCGA-UF-A7JK	IV	Advanced	TCGA-BA-A6DG-01	TCGA-BA-A6DG	TNS	TNS	TCGA-CN-4736-01	TCGA-CN-4736	TNS	TNS
TCGA-UF-A7JO-01	TCGA-UF-A7JO	IV	Advanced	TCGA-BA-A6DI-01	TCGA-BA-A6DI	TNS	TNS	TCGA-CN-6021-01	TCGA-CN-6021	TNS	TNS
TCGA-UF-A7JS-01	TCGA-UF-A7JS	IV	Advanced	TCGA-BA-A6DL-01	TCGA-BA-A6DL	TNS	TNS	TCGA-CN-A49C-01	TCGA-CN-A49C	TNS	TNS
TCGA-UF-A7JT-01	TCGA-UF-A7JT	IV	Advanced	TCGA-BB-4225-01	TCGA-BB-4225	TNS	TNS	TCGA-CQ-5331-01	TCGA-CQ-5331	TNS	TNS
TCGA-UF-A7JV-01	TCGA-UF-A7JV	IV	Advanced	TCGA-CN-4736-01	TCGA-CN-4736	TNS	TNS	TCGA-CQ-6221-01	TCGA-CQ-6221	TNS	TNS
TCGA-BA-4076-01	TCGA-BA-4076	TNS	TNS	TCGA-CN-6021-01	TCGA-CN-6021	TNS	TNS	TCGA-CR-5243-01	TCGA-CR-5243	TNS	TNS
TCGA-BA-4078-01	TCGA-BA-4078	TNS	TNS	TCGA-CN-A49C-01	TCGA-CN-A49C	TNS	TNS	TCGA-CR-5247-01	TCGA-CR-5247	TNS	TNS
TCGA-BA-5153-01	TCGA-BA-5153	TNS	TNS	TCGA-CQ-5331-01	TCGA-CQ-5331	TNS	TNS	TCGA-CR-5248-01	TCGA-CR-5248	TNS	TNS
TCGA-BA-5558-01	TCGA-BA-5558	TNS	TNS	TCGA-CQ-6221-01	TCGA-CQ-6221	TNS	TNS	TCGA-CR-5250-01	TCGA-CR-5250	TNS	TNS
TCGA-BA-5559-01	TCGA-BA-5559	TNS	TNS	TCGA-CR-5243-01	TCGA-CR-5243	TNS	TNS	TCGA-CR-6472-01	TCGA-CR-6472	TNS	TNS
TCGA-BA-6868-01	TCGA-BA-6868	TNS	TNS	TCGA-CR-5247-01	TCGA-CR-5247	TNS	TNS	TCGA-CR-6473-01	TCGA-CR-6473	TNS	TNS
TCGA-BA-6870-01	TCGA-BA-6870	TNS	TNS	TCGA-CR-5248-01	TCGA-CR-5248	TNS	TNS	TCGA-CR-6477-01	TCGA-CR-6477	TNS	TNS
TCGA-BA-6871-01	TCGA-BA-6871	TNS	TNS	TCGA-CR-5250-01	TCGA-CR-5250	TNS	TNS	TCGA-CR-6478-01	TCGA-CR-6478	TNS	TNS
TCGA-BA-6872-01	TCGA-BA-6872	TNS	TNS	TCGA-CR-6472-01	TCGA-CR-6472	TNS	TNS	TCGA-CR-6480-01	TCGA-CR-6480	TNS	TNS
TCGA-BA-A4IF-01	TCGA-BA-A4IF	TNS	TNS	TCGA-CR-6473-01	TCGA-CR-6473	TNS	TNS	TCGA-CR-6481-01	TCGA-CR-6481	TNS	TNS
TCGA-BA-A4IG-01	TCGA-BA-A4IG	TNS	TNS	TCGA-CR-6477-01	TCGA-CR-6477	TNS	TNS	TCGA-CR-6482-01	TCGA-CR-6482	TNS	TNS
TCGA-BA-A4IH-01	TCGA-BA-A4IH	TNS	TNS	TCGA-CR-6478-01	TCGA-CR-6478	TNS	TNS	TCGA-CR-7370-01	TCGA-CR-7370	TNS	TNS
TCGA-BA-A6DG-01	TCGA-BA-A6DG	TNS	TNS	TCGA-CR-6480-01	TCGA-CR-6480	TNS	TNS	TCGA-CR-7374-01	TCGA-CR-7374	TNS	TNS
TCGA-BA-A6DI-01	TCGA-BA-A6DI	TNS	TNS	TCGA-CR-6481-01	TCGA-CR-6481	TNS	TNS	TCGA-CR-7385-01	TCGA-CR-7385	TNS	TNS
TCGA-BA-A6DL-01	TCGA-BA-A6DL	TNS	TNS	TCGA-CR-6482-01	TCGA-CR-6482	TNS	TNS	TCGA-CR-7388-01	TCGA-CR-7388	TNS	TNS
TCGA-BB-4225-01	TCGA-BB-4225	TNS	TNS	TCGA-CR-7370-01	TCGA-CR-7370	TNS	TNS	TCGA-CR-7389-01	TCGA-CR-7389	TNS	TNS
TCGA-BB-7866-01	TCGA-BB-7866	TNS	TNS	TCGA-CR-7374-01	TCGA-CR-7374	TNS	TNS	TCGA-CR-7402-01	TCGA-CR-7402	TNS	TNS
TCGA-CN-4736-01	TCGA-CN-4736	TNS	TNS	TCGA-CR-7385-01	TCGA-CR-7385	TNS	TNS	TCGA-CR-7404-01	TCGA-CR-7404	TNS	TNS
TCGA-CN-6021-01	TCGA-CN-6021	TNS	TNS	TCGA-CR-7388-01	TCGA-CR-7388	TNS	TNS	TCGA-CV-A45O-01	TCGA-CV-A45O	TNS	TNS
TCGA-CN-A49C-01	TCGA-CN-A49C	TNS	TNS	TCGA-CR-7389-01	TCGA-CR-7389	TNS	TNS	TCGA-CV-A45Q-01	TCGA-CV-A45Q	TNS	TNS
TCGA-CQ-5331-01	TCGA-CQ-5331	TNS	TNS	TCGA-CR-7402-01	TCGA-CR-7402	TNS	TNS	TCGA-CV-A45T-01	TCGA-CV-A45T	TNS	TNS
TCGA-CQ-6221-01	TCGA-CQ-6221	TNS	TNS	TCGA-CR-7404-01	TCGA-CR-7404	TNS	TNS	TCGA-CV-A45Z-01	TCGA-CV-A45Z	TNS	TNS
TCGA-CR-5243-01	TCGA-CR-5243	TNS	TNS	TCGA-CV-A45O-01	TCGA-CV-A45O	TNS	TNS	TCGA-CV-A460-01	TCGA-CV-A460	TNS	TNS
TCGA-CR-5247-01	TCGA-CR-5247	TNS	TNS	TCGA-CV-A45Q-01	TCGA-CV-A45Q	TNS	TNS	TCGA-CV-A461-01	TCGA-CV-A461	TNS	TNS
TCGA-CR-5248-01	TCGA-CR-5248	TNS	TNS	TCGA-CV-A45T-01	TCGA-CV-A45T	TNS	TNS	TCGA-CV-A6JD-01	TCGA-CV-A6JD	TNS	TNS
TCGA-CR-5250-01	TCGA-CR-5250	TNS	TNS	TCGA-CV-A45Z-01	TCGA-CV-A45Z	TNS	TNS	TCGA-CV-A6JE-01	TCGA-CV-A6JE	TNS	TNS
TCGA-CR-6472-01	TCGA-CR-6472	TNS	TNS	TCGA-CV-A460-01	TCGA-CV-A460	TNS	TNS	TCGA-CV-A6JM-01	TCGA-CV-A6JM	TNS	TNS
TCGA-CR-6473-01	TCGA-CR-6473	TNS	TNS	TCGA-CV-A461-01	TCGA-CV-A461	TNS	TNS	TCGA-CV-A6JN-01	TCGA-CV-A6JN	TNS	TNS
TCGA-CR-6477-01	TCGA-CR-6477	TNS	TNS	TCGA-CV-A6JD-01	TCGA-CV-A6JD	TNS	TNS	TCGA-DQ-5624-01	TCGA-DQ-5624	TNS	TNS
TCGA-CR-6478-01	TCGA-CR-6478	TNS	TNS	TCGA-CV-A6JE-01	TCGA-CV-A6JE	TNS	TNS	TCGA-DQ-5625-01	TCGA-DQ-5625	TNS	TNS
TCGA-CR-6480-01	TCGA-CR-6480	TNS	TNS	TCGA-CV-A6JM-01	TCGA-CV-A6JM	TNS	TNS	TCGA-DQ-5629-01	TCGA-DQ-5629	TNS	TNS
TCGA-CR-6481-01	TCGA-CR-6481	TNS	TNS	TCGA-CV-A6JN-01	TCGA-CV-A6JN	TNS	TNS	TCGA-DQ-5630-01	TCGA-DQ-5630	TNS	TNS
TCGA-CR-6482-01	TCGA-CR-6482	TNS	TNS	TCGA-DQ-5624-01	TCGA-DQ-5624	TNS	TNS	TCGA-DQ-5631-01	TCGA-DQ-5631	TNS	TNS
TCGA-CR-7370-01	TCGA-CR-7370	TNS	TNS	TCGA-DQ-5625-01	TCGA-DQ-5625	TNS	TNS	TCGA-DQ-7588-01	TCGA-DQ-7588	TNS	TNS
TCGA-CR-7374-01	TCGA-CR-7374	TNS	TNS	TCGA-DQ-5629-01	TCGA-DQ-5629	TNS	TNS	TCGA-DQ-7591-01	TCGA-DQ-7591	TNS	TNS
TCGA-CR-7385-01	TCGA-CR-7385	TNS	TNS	TCGA-DQ-5630-01	TCGA-DQ-5630	TNS	TNS	TCGA-DQ-7592-01	TCGA-DQ-7592	TNS	TNS
TCGA-CR-7388-01	TCGA-CR-7388	TNS	TNS	TCGA-DQ-5631-01	TCGA-DQ-5631	TNS	TNS	TCGA-H7-A76A-01	TCGA-H7-A76A	TNS	TNS
TCGA-CR-7389-01	TCGA-CR-7389	TNS	TNS	TCGA-DQ-7588-01	TCGA-DQ-7588	TNS	TNS	TCGA-HL-7533-01	TCGA-HL-7533	TNS	TNS
TCGA-CR-7402-01	TCGA-CR-7402	TNS	TNS	TCGA-DQ-7591-01	TCGA-DQ-7591	TNS	TNS	TCGA-MZ-A5BI-01	TCGA-MZ-A5BI	TNS	TNS
TCGA-CR-7404-01	TCGA-CR-7404	TNS	TNS	TCGA-DQ-7592-01	TCGA-DQ-7592	TNS	TNS	TCGA-MZ-A6I9-01	TCGA-MZ-A6I9	TNS	TNS
TCGA-CV-A45O-01	TCGA-CV-A45O	TNS	TNS	TCGA-H7-A76A-01	TCGA-H7-A76A	TNS	TNS	TCGA-QK-A6IF-01	TCGA-QK-A6IF	TNS	TNS
TCGA-CV-A45Q-01	TCGA-CV-A45Q	TNS	TNS	TCGA-HL-7533-01	TCGA-HL-7533	TNS	TNS	TCGA-QK-A8ZA-01	TCGA-QK-A8ZA	TNS	TNS
TCGA-CV-A45T-01	TCGA-CV-A45T	TNS	TNS	TCGA-MZ-A5BI-01	TCGA-MZ-A5BI	TNS	TNS	TCGA-T2-A6WX-01	TCGA-T2-A6WX	TNS	TNS
TCGA-CV-A45Z-01	TCGA-CV-A45Z	TNS	TNS	TCGA-MZ-A6I9-01	TCGA-MZ-A6I9	TNS	TNS	TCGA-T2-A6WZ-01	TCGA-T2-A6WZ	TNS	TNS
TCGA-CV-A460-01	TCGA-CV-A460	TNS	TNS	TCGA-QK-A6IF-01	TCGA-QK-A6IF	TNS	TNS	TCGA-T2-A6X0-01	TCGA-T2-A6X0	TNS	TNS
TCGA-CV-A461-01	TCGA-CV-A461	TNS	TNS	TCGA-QK-A8ZA-01	TCGA-QK-A8ZA	TNS	TNS	TCGA-UP-A6WW-01	TCGA-UP-A6WW	TNS	TNS
TCGA-CV-A6JD-01	TCGA-CV-A6JD	TNS	TNS	TCGA-T2-A6WX-01	TCGA-T2-A6WX	TNS	TNS
TCGA-CV-A6JE-01	TCGA-CV-A6JE	TNS	TNS	TCGA-T2-A6WZ-01	TCGA-T2-A6WZ	TNS	TNS
TCGA-CV-A6JM-01	TCGA-CV-A6JM	TNS	TNS	TCGA-T2-A6X0-01	TCGA-T2-A6X0	TNS	TNS
TCGA-CV-A6JN-01	TCGA-CV-A6JN	TNS	TNS	TCGA-UP-A6WW-01	TCGA-UP-A6WW	TNS	TNS
TCGA-DQ-5624-01	TCGA-DQ-5624	TNS	TNS	TCGA-WA-A7GZ-01	TCGA-WA-A7GZ	TNS	TNS
TCGA-DQ-5625-01	TCGA-DQ-5625	TNS	TNS
TCGA-DQ-5629-01	TCGA-DQ-5629	TNS	TNS
TCGA-DQ-5630-01	TCGA-DQ-5630	TNS	TNS
TCGA-DQ-5631-01	TCGA-DQ-5631	TNS	TNS
TCGA-DQ-7588-01	TCGA-DQ-7588	TNS	TNS
TCGA-DQ-7589-01	TCGA-DQ-7589	TNS	TNS
TCGA-DQ-7590-01	TCGA-DQ-7590	TNS	TNS
TCGA-DQ-7591-01	TCGA-DQ-7591	TNS	TNS
TCGA-DQ-7592-01	TCGA-DQ-7592	TNS	TNS
TCGA-DQ-7593-01	TCGA-DQ-7593	TNS	TNS
TCGA-DQ-7594-01	TCGA-DQ-7594	TNS	TNS
TCGA-DQ-7595-01	TCGA-DQ-7595	TNS	TNS
TCGA-DQ-7596-01	TCGA-DQ-7596	TNS	TNS
TCGA-H7-A76A-01	TCGA-H7-A76A	TNS	TNS
TCGA-HL-7533-01	TCGA-HL-7533	TNS	TNS
TCGA-MZ-A5BI-01	TCGA-MZ-A5BI	TNS	TNS
TCGA-MZ-A6I9-01	TCGA-MZ-A6I9	TNS	TNS
TCGA-QK-A6IF-01	TCGA-QK-A6IF	TNS	TNS
TCGA-QK-A8ZA-01	TCGA-QK-A8ZA	TNS	TNS
TCGA-T2-A6WX-01	TCGA-T2-A6WX	TNS	TNS
TCGA-T2-A6WZ-01	TCGA-T2-A6WZ	TNS	TNS
TCGA-T2-A6X0-01	TCGA-T2-A6X0	TNS	TNS
TCGA-UP-A6WW-01	TCGA-UP-A6WW	TNS	TNS

## Sheet: KICH
Step 1 (Differential analysis )								Step 2 (Correlation analysis)				Step 3 (Confirm correlation result)
miRNA sequencing				RNA sequencing				RNA sequencing and miRNA sequencing				Paired samples
Samples	Patients	Stages	Groups	Samples	Patients	Stages	Groups	Samples	Patients	Stages	Groups	Samples	Patients	Stages	Groups
TCGA-KL-8324-11	TCGA-KL-8324	HC	HC	TCGA-KL-8324-11	TCGA-KL-8324	HC	HC	TCGA-KL-8324-11	TCGA-KL-8324	HC	HC	TCGA-KL-8324-11	TCGA-KL-8324	HC	HC
TCGA-KL-8326-11	TCGA-KL-8326	HC	HC	TCGA-KL-8326-11	TCGA-KL-8326	HC	HC	TCGA-KL-8326-11	TCGA-KL-8326	HC	HC	TCGA-KL-8324-01	TCGA-KL-8324	II	Early
TCGA-KL-8329-11	TCGA-KL-8329	HC	HC	TCGA-KL-8329-11	TCGA-KL-8329	HC	HC	TCGA-KL-8329-11	TCGA-KL-8329	HC	HC	TCGA-KL-8326-11	TCGA-KL-8326	HC	HC
TCGA-KL-8332-11	TCGA-KL-8332	HC	HC	TCGA-KL-8336-11	TCGA-KL-8336	HC	HC	TCGA-KL-8336-11	TCGA-KL-8336	HC	HC	TCGA-KL-8326-01	TCGA-KL-8326	III	Advanced
TCGA-KL-8336-11	TCGA-KL-8336	HC	HC	TCGA-KL-8339-11	TCGA-KL-8339	HC	HC	TCGA-KL-8339-11	TCGA-KL-8339	HC	HC	TCGA-KL-8329-11	TCGA-KL-8329	HC	HC
TCGA-KL-8339-11	TCGA-KL-8339	HC	HC	TCGA-KN-8419-11	TCGA-KN-8419	HC	HC	TCGA-KN-8419-11	TCGA-KN-8419	HC	HC	TCGA-KL-8329-01	TCGA-KL-8329	I	Early
TCGA-KN-8419-11	TCGA-KN-8419	HC	HC	TCGA-KN-8422-11	TCGA-KN-8422	HC	HC	TCGA-KN-8422-11	TCGA-KN-8422	HC	HC	TCGA-KL-8336-11	TCGA-KL-8336	HC	HC
TCGA-KN-8422-11	TCGA-KN-8422	HC	HC	TCGA-KN-8423-11	TCGA-KN-8423	HC	HC	TCGA-KN-8423-11	TCGA-KN-8423	HC	HC	TCGA-KL-8336-01	TCGA-KL-8336	IV	Advanced
TCGA-KN-8423-11	TCGA-KN-8423	HC	HC	TCGA-KN-8424-11	TCGA-KN-8424	HC	HC	TCGA-KN-8424-11	TCGA-KN-8424	HC	HC	TCGA-KL-8339-11	TCGA-KL-8339	HC	HC
TCGA-KN-8424-11	TCGA-KN-8424	HC	HC	TCGA-KN-8425-11	TCGA-KN-8425	HC	HC	TCGA-KN-8425-11	TCGA-KN-8425	HC	HC	TCGA-KL-8339-01	TCGA-KL-8339	IV	Advanced
TCGA-KN-8425-11	TCGA-KN-8425	HC	HC	TCGA-KN-8426-11	TCGA-KN-8426	HC	HC	TCGA-KN-8426-11	TCGA-KN-8426	HC	HC	TCGA-KN-8419-11	TCGA-KN-8419	HC	HC
TCGA-KN-8426-11	TCGA-KN-8426	HC	HC	TCGA-KN-8427-11	TCGA-KN-8427	HC	HC	TCGA-KN-8427-11	TCGA-KN-8427	HC	HC	TCGA-KN-8419-01	TCGA-KN-8419	II	Early
TCGA-KN-8427-11	TCGA-KN-8427	HC	HC	TCGA-KN-8428-11	TCGA-KN-8428	HC	HC	TCGA-KN-8428-11	TCGA-KN-8428	HC	HC	TCGA-KN-8423-11	TCGA-KN-8423	HC	HC
TCGA-KN-8428-11	TCGA-KN-8428	HC	HC	TCGA-KN-8429-11	TCGA-KN-8429	HC	HC	TCGA-KN-8429-11	TCGA-KN-8429	HC	HC	TCGA-KN-8423-01	TCGA-KN-8423	I	Early
TCGA-KN-8429-11	TCGA-KN-8429	HC	HC	TCGA-KN-8430-11	TCGA-KN-8430	HC	HC	TCGA-KN-8430-11	TCGA-KN-8430	HC	HC	TCGA-KN-8424-11	TCGA-KN-8424	HC	HC
TCGA-KN-8430-11	TCGA-KN-8430	HC	HC	TCGA-KN-8431-11	TCGA-KN-8431	HC	HC	TCGA-KN-8431-11	TCGA-KN-8431	HC	HC	TCGA-KN-8424-01	TCGA-KN-8424	I	Early
TCGA-KN-8431-11	TCGA-KN-8431	HC	HC	TCGA-KN-8432-11	TCGA-KN-8432	HC	HC	TCGA-KN-8432-11	TCGA-KN-8432	HC	HC	TCGA-KN-8425-11	TCGA-KN-8425	HC	HC
TCGA-KN-8432-11	TCGA-KN-8432	HC	HC	TCGA-KN-8433-11	TCGA-KN-8433	HC	HC	TCGA-KN-8433-11	TCGA-KN-8433	HC	HC	TCGA-KN-8425-01	TCGA-KN-8425	I	Early
TCGA-KN-8433-11	TCGA-KN-8433	HC	HC	TCGA-KN-8434-11	TCGA-KN-8434	HC	HC	TCGA-KN-8434-11	TCGA-KN-8434	HC	HC	TCGA-KN-8426-11	TCGA-KN-8426	HC	HC
TCGA-KN-8434-11	TCGA-KN-8434	HC	HC	TCGA-KN-8435-11	TCGA-KN-8435	HC	HC	TCGA-KN-8435-11	TCGA-KN-8435	HC	HC	TCGA-KN-8426-01	TCGA-KN-8426	IV	Advanced
TCGA-KN-8435-11	TCGA-KN-8435	HC	HC	TCGA-KN-8436-11	TCGA-KN-8436	HC	HC	TCGA-KN-8436-11	TCGA-KN-8436	HC	HC	TCGA-KN-8427-11	TCGA-KN-8427	HC	HC
TCGA-KN-8436-11	TCGA-KN-8436	HC	HC	TCGA-KN-8437-11	TCGA-KN-8437	HC	HC	TCGA-KN-8437-11	TCGA-KN-8437	HC	HC	TCGA-KN-8427-01	TCGA-KN-8427	IV	Advanced
TCGA-KN-8437-11	TCGA-KN-8437	HC	HC	TCGA-KO-8403-11	TCGA-KO-8403	HC	HC	TCGA-KO-8403-11	TCGA-KO-8403	HC	HC	TCGA-KN-8428-11	TCGA-KN-8428	HC	HC
TCGA-KO-8403-11	TCGA-KO-8403	HC	HC	TCGA-KO-8415-11	TCGA-KO-8415	HC	HC	TCGA-KO-8415-11	TCGA-KO-8415	HC	HC	TCGA-KN-8428-01	TCGA-KN-8428	II	Early
TCGA-KO-8415-11	TCGA-KO-8415	HC	HC	TCGA-KL-8327-01	TCGA-KL-8327	I	Early	TCGA-KL-8327-01	TCGA-KL-8327	I	Early	TCGA-KN-8429-11	TCGA-KN-8429	HC	HC
TCGA-KL-8327-01	TCGA-KL-8327	I	Early	TCGA-KL-8329-01	TCGA-KL-8329	I	Early	TCGA-KL-8329-01	TCGA-KL-8329	I	Early	TCGA-KN-8429-01	TCGA-KN-8429	III	Advanced
TCGA-KL-8329-01	TCGA-KL-8329	I	Early	TCGA-KL-8332-01	TCGA-KL-8332	I	Early	TCGA-KL-8332-01	TCGA-KL-8332	I	Early	TCGA-KN-8430-11	TCGA-KN-8430	HC	HC
TCGA-KL-8332-01	TCGA-KL-8332	I	Early	TCGA-KM-8439-01	TCGA-KM-8439	I	Early	TCGA-KM-8439-01	TCGA-KM-8439	I	Early	TCGA-KN-8430-01	TCGA-KN-8430	I	Early
TCGA-KM-8439-01	TCGA-KM-8439	I	Early	TCGA-KM-8441-01	TCGA-KM-8441	I	Early	TCGA-KM-8441-01	TCGA-KM-8441	I	Early	TCGA-KN-8431-11	TCGA-KN-8431	HC	HC
TCGA-KM-8441-01	TCGA-KM-8441	I	Early	TCGA-KM-8476-01	TCGA-KM-8476	I	Early	TCGA-KM-8476-01	TCGA-KM-8476	I	Early	TCGA-KN-8431-01	TCGA-KN-8431	II	Early
TCGA-KM-8476-01	TCGA-KM-8476	I	Early	TCGA-KM-8477-01	TCGA-KM-8477	I	Early	TCGA-KM-8477-01	TCGA-KM-8477	I	Early	TCGA-KN-8432-11	TCGA-KN-8432	HC	HC
TCGA-KM-8477-01	TCGA-KM-8477	I	Early	TCGA-KM-8639-01	TCGA-KM-8639	I	Early	TCGA-KM-8639-01	TCGA-KM-8639	I	Early	TCGA-KN-8432-01	TCGA-KN-8432	II	Early
TCGA-KM-8639-01	TCGA-KM-8639	I	Early	TCGA-KN-8423-01	TCGA-KN-8423	I	Early	TCGA-KN-8423-01	TCGA-KN-8423	I	Early	TCGA-KN-8433-11	TCGA-KN-8433	HC	HC
TCGA-KN-8422-01	TCGA-KN-8422	I	Early	TCGA-KN-8424-01	TCGA-KN-8424	I	Early	TCGA-KN-8424-01	TCGA-KN-8424	I	Early	TCGA-KN-8433-01	TCGA-KN-8433	III	Advanced
TCGA-KN-8423-01	TCGA-KN-8423	I	Early	TCGA-KN-8425-01	TCGA-KN-8425	I	Early	TCGA-KN-8425-01	TCGA-KN-8425	I	Early	TCGA-KN-8434-11	TCGA-KN-8434	HC	HC
TCGA-KN-8424-01	TCGA-KN-8424	I	Early	TCGA-KN-8430-01	TCGA-KN-8430	I	Early	TCGA-KN-8430-01	TCGA-KN-8430	I	Early	TCGA-KN-8434-01	TCGA-KN-8434	II	Early
TCGA-KN-8425-01	TCGA-KN-8425	I	Early	TCGA-KN-8437-01	TCGA-KN-8437	I	Early	TCGA-KN-8437-01	TCGA-KN-8437	I	Early	TCGA-KN-8435-11	TCGA-KN-8435	HC	HC
TCGA-KN-8430-01	TCGA-KN-8430	I	Early	TCGA-KO-8403-01	TCGA-KO-8403	I	Early	TCGA-KO-8403-01	TCGA-KO-8403	I	Early	TCGA-KN-8435-01	TCGA-KN-8435	II	Early
TCGA-KN-8437-01	TCGA-KN-8437	I	Early	TCGA-KO-8406-01	TCGA-KO-8406	I	Early	TCGA-KO-8406-01	TCGA-KO-8406	I	Early	TCGA-KN-8436-11	TCGA-KN-8436	HC	HC
TCGA-KO-8403-01	TCGA-KO-8403	I	Early	TCGA-KO-8410-01	TCGA-KO-8410	I	Early	TCGA-KO-8410-01	TCGA-KO-8410	I	Early	TCGA-KN-8436-01	TCGA-KN-8436	II	Early
TCGA-KO-8406-01	TCGA-KO-8406	I	Early	TCGA-KO-8411-01	TCGA-KO-8411	I	Early	TCGA-KO-8411-01	TCGA-KO-8	I	Early	TCGA-KN-8437-11	TCGA-KN-8437	HC	HC
TCGA-KO-8410-01	TCGA-KO-8410	I	Early	TCGA-KO-8413-01	TCGA-KO-8413	I	Early	TCGA-KO-8413-01	TCGA-KO-8413	I	Early	TCGA-KN-8437-01	TCGA-KN-8437	I	Early
TCGA-KO-8411-01	TCGA-KO-8411	I	Early	TCGA-KO-8415-01	TCGA-KO-8415	I	Early	TCGA-KO-8415-01	TCGA-KO-8415	I	Early	TCGA-KO-8403-11	TCGA-KO-8403	HC	HC
TCGA-KO-8413-01	TCGA-KO-8413	I	Early	TCGA-KO-8417-01	TCGA-KO-8417	I	Early	TCGA-KO-8417-01	TCGA-KO-8417	I	Early	TCGA-KO-8403-01	TCGA-KO-8403	I	Early
TCGA-KO-8415-01	TCGA-KO-8415	I	Early	TCGA-KL-8324-01	TCGA-KL-8324	II	Early	TCGA-KL-8324-01	TCGA-KL-8324	II	Early	TCGA-KO-8415-11	TCGA-KO-8415	HC	HC
TCGA-KO-8417-01	TCGA-KO-8417	I	Early	TCGA-KL-8325-01	TCGA-KL-8325	II	Early	TCGA-KL-8325-01	TCGA-KL-8325	II	Early	TCGA-KO-8415-01	TCGA-KO-8415	I	Early
TCGA-KL-8324-01	TCGA-KL-8324	II	Early	TCGA-KL-8328-01	TCGA-KL-8328	II	Early	TCGA-KL-8328-01	TCGA-KL-8328	II	Early
TCGA-KL-8325-01	TCGA-KL-8325	II	Early	TCGA-KL-8330-01	TCGA-KL-8330	II	Early	TCGA-KL-8330-01	TCGA-KL-8330	II	Early
TCGA-KL-8328-01	TCGA-KL-8328	II	Early	TCGA-KL-8331-01	TCGA-KL-8331	II	Early	TCGA-KL-8331-01	TCGA-KL-8331	II	Early
TCGA-KL-8330-01	TCGA-KL-8330	II	Early	TCGA-KL-8333-01	TCGA-KL-8333	II	Early	TCGA-KL-8333-01	TCGA-KL-8333	II	Early
TCGA-KL-8331-01	TCGA-KL-8331	II	Early	TCGA-KL-8337-01	TCGA-KL-8337	II	Early	TCGA-KL-8337-01	TCGA-KL-8337	II	Early
TCGA-KL-8333-01	TCGA-KL-8333	II	Early	TCGA-KL-8340-01	TCGA-KL-8340	II	Early	TCGA-KL-8340-01	TCGA-KL-8340	II	Early
TCGA-KL-8337-01	TCGA-KL-8337	II	Early	TCGA-KL-8342-01	TCGA-KL-8342	II	Early	TCGA-KL-8342-01	TCGA-KL-8342	II	Early
TCGA-KL-8340-01	TCGA-KL-8340	II	Early	TCGA-KL-8346-01	TCGA-KL-8346	II	Early	TCGA-KL-8346-01	TCGA-KL-8346	II	Early
TCGA-KL-8342-01	TCGA-KL-8342	II	Early	TCGA-KM-8438-01	TCGA-KM-8438	II	Early	TCGA-KM-8438-01	TCGA-KM-8438	II	Early
TCGA-KL-8346-01	TCGA-KL-8346	II	Early	TCGA-KM-8442-01	TCGA-KM-8442	II	Early	TCGA-KM-8442-01	TCGA-KM-8442	II	Early
TCGA-KM-8438-01	TCGA-KM-8438	II	Early	TCGA-KM-8443-01	TCGA-KM-8443	II	Early	TCGA-KM-8443-01	TCGA-KM-8443	II	Early
TCGA-KM-8442-01	TCGA-KM-8442	II	Early	TCGA-KN-8418-01	TCGA-KN-8418	II	Early	TCGA-KN-8418-01	TCGA-KN-8418	II	Early
TCGA-KM-8443-01	TCGA-KM-8443	II	Early	TCGA-KN-8419-01	TCGA-KN-8419	II	Early	TCGA-KN-8419-01	TCGA-KN-8419	II	Early
TCGA-KN-8418-01	TCGA-KN-8418	II	Early	TCGA-KN-8421-01	TCGA-KN-8421	II	Early	TCGA-KN-8421-01	TCGA-KN-8421	II	Early
TCGA-KN-8419-01	TCGA-KN-8419	II	Early	TCGA-KN-8428-01	TCGA-KN-8428	II	Early	TCGA-KN-8428-01	TCGA-KN-8428	II	Early
TCGA-KN-8421-01	TCGA-KN-8421	II	Early	TCGA-KN-8431-01	TCGA-KN-8431	II	Early	TCGA-KN-8431-01	TCGA-KN-8431	II	Early
TCGA-KN-8428-01	TCGA-KN-8428	II	Early	TCGA-KN-8432-01	TCGA-KN-8432	II	Early	TCGA-KN-8432-01	TCGA-KN-8432	II	Early
TCGA-KN-8431-01	TCGA-KN-8431	II	Early	TCGA-KN-8434-01	TCGA-KN-8434	II	Early	TCGA-KN-8434-01	TCGA-KN-8434	II	Early
TCGA-KN-8432-01	TCGA-KN-8432	II	Early	TCGA-KN-8435-01	TCGA-KN-8435	II	Early	TCGA-KN-8435-01	TCGA-KN-8435	II	Early
TCGA-KN-8434-01	TCGA-KN-8434	II	Early	TCGA-KN-8436-01	TCGA-KN-8436	II	Early	TCGA-KN-8436-01	TCGA-KN-8436	II	Early
TCGA-KN-8435-01	TCGA-KN-8435	II	Early	TCGA-KO-8407-01	TCGA-KO-8407	II	Early	TCGA-KO-8407-01	TCGA-KO-8407	II	Early
TCGA-KN-8436-01	TCGA-KN-8436	II	Early	TCGA-KO-8409-01	TCGA-KO-8409	II	Early	TCGA-KO-8409-01	TCGA-KO-8409	II	Early
TCGA-KO-8407-01	TCGA-KO-8407	II	Early	TCGA-KO-8414-01	TCGA-KO-8414	II	Early	TCGA-KO-8414-01	TCGA-KO-8414	II	Early
TCGA-KO-8409-01	TCGA-KO-8409	II	Early	TCGA-KL-8323-01	TCGA-KL-8323	III	Advanced	TCGA-KL-8323-01	TCGA-KL-8323	III	Advanced
TCGA-KO-8414-01	TCGA-KO-8414	II	Early	TCGA-KL-8326-01	TCGA-KL-8326	III	Advanced	TCGA-KL-8326-01	TCGA-KL-8326	III	Advanced
TCGA-KL-8323-01	TCGA-KL-8323	III	Advanced	TCGA-KL-8334-01	TCGA-KL-8334	III	Advanced	TCGA-KL-8334-01	TCGA-KL-8334	III	Advanced
TCGA-KL-8326-01	TCGA-KL-8326	III	Advanced	TCGA-KL-8335-01	TCGA-KL-8335	III	Advanced	TCGA-KL-8335-01	TCGA-KL-8335	III	Advanced
TCGA-KL-8334-01	TCGA-KL-8334	III	Advanced	TCGA-KL-8338-01	TCGA-KL-8338	III	Advanced	TCGA-KL-8338-01	TCGA-KL-8338	III	Advanced
TCGA-KL-8335-01	TCGA-KL-8335	III	Advanced	TCGA-KL-8343-01	TCGA-KL-8343	III	Advanced	TCGA-KL-8343-01	TCGA-KL-8343	III	Advanced
TCGA-KL-8338-01	TCGA-KL-8338	III	Advanced	TCGA-KL-8344-01	TCGA-KL-8344	III	Advanced	TCGA-KL-8344-01	TCGA-KL-8344	III	Advanced
TCGA-KL-8343-01	TCGA-KL-8343	III	Advanced	TCGA-KL-8345-01	TCGA-KL-8345	III	Advanced	TCGA-KL-8345-01	TCGA-KL-8345	III	Advanced
TCGA-KL-8344-01	TCGA-KL-8344	III	Advanced	TCGA-KM-8440-01	TCGA-KM-8440	III	Advanced	TCGA-KM-8440-01	TCGA-KM-8440	III	Advanced
TCGA-KL-8345-01	TCGA-KL-8345	III	Advanced	TCGA-KN-8429-01	TCGA-KN-8429	III	Advanced	TCGA-KN-8429-01	TCGA-KN-8429	III	Advanced
TCGA-KM-8440-01	TCGA-KM-8440	III	Advanced	TCGA-KN-8433-01	TCGA-KN-8433	III	Advanced	TCGA-KN-8433-01	TCGA-KN-8433	III	Advanced
TCGA-KN-8429-01	TCGA-KN-8429	III	Advanced	TCGA-KO-8405-01	TCGA-KO-8405	III	Advanced	TCGA-KO-8405-01	TCGA-KO-8405	III	Advanced
TCGA-KN-8433-01	TCGA-KN-8433	III	Advanced	TCGA-KO-8408-01	TCGA-KO-8408	III	Advanced	TCGA-KO-8408-01	TCGA-KO-8408	III	Advanced
TCGA-KO-8405-01	TCGA-KO-8405	III	Advanced	TCGA-KO-8416-01	TCGA-KO-8416	III	Advanced	TCGA-KO-8416-01	TCGA-KO-8416	III	Advanced
TCGA-KO-8408-01	TCGA-KO-8408	III	Advanced	TCGA-KL-8336-01	TCGA-KL-8336	IV	Advanced	TCGA-KL-8336-01	TCGA-KL-8336	IV	Advanced
TCGA-KO-8416-01	TCGA-KO-8416	III	Advanced	TCGA-KL-8339-01	TCGA-KL-8339	IV	Advanced	TCGA-KL-8339-01	TCGA-KL-8339	IV	Advanced
TCGA-KL-8336-01	TCGA-KL-8336	IV	Advanced	TCGA-KL-8341-01	TCGA-KL-8341	IV	Advanced	TCGA-KL-8341-01	TCGA-KL-8341	IV	Advanced
TCGA-KL-8339-01	TCGA-KL-8339	IV	Advanced	TCGA-KN-8426-01	TCGA-KN-8426	IV	Advanced	TCGA-KN-8426-01	TCGA-KN-8426	IV	Advanced
TCGA-KL-8341-01	TCGA-KL-8341	IV	Advanced	TCGA-KN-8427-01	TCGA-KN-8427	IV	Advanced	TCGA-KN-8427-01	TCGA-KN-8427	IV	Advanced
TCGA-KN-8426-01	TCGA-KN-8426	IV	Advanced	TCGA-KO-8404-01	TCGA-KO-8404	IV	Advanced	TCGA-KO-8404-01	TCGA-KO-8404	IV	Advanced
TCGA-KN-8427-01	TCGA-KN-8427	IV	Advanced
TCGA-KO-8404-01	TCGA-KO-8404	IV	Advanced

## Sheet: KIRC
Step 1 (Differential analysis )								Step 2 (Correlation analysis)				Step 3 (Confirm correlation result)
miRNA sequencing				RNA sequencing				RNA sequencing and miRNA sequencing				Paired samples
Samples	Patients	Stages	Groups	Samples	Patients	Stages	Groups	Samples	Patients	Stages	Groups	Samples	Patients	Stages	Groups
TCGA-A3-3358-11	TCGA-A3-3358	HC	HC	TCGA-A3-3358-11	TCGA-A3-3358	HC	HC	TCGA-A3-3358-11	TCGA-A3-3358	HC	HC	TCGA-A3-3358-11	TCGA-A3-3358	HC	HC
TCGA-A3-3387-11	TCGA-A3-3387	HC	HC	TCGA-A3-3387-11	TCGA-A3-3387	HC	HC	TCGA-A3-3387-11	TCGA-A3-3387	HC	HC	TCGA-A3-3358-01	TCGA-A3-3358	I	Early
TCGA-B0-4700-11	TCGA-B0-4700	HC	HC	TCGA-B0-4700-11	TCGA-B0-4700	HC	HC	TCGA-B0-4700-11	TCGA-B0-4700	HC	HC	TCGA-A3-3387-11	TCGA-A3-3387	HC	HC
TCGA-B0-4712-11	TCGA-B0-4712	HC	HC	TCGA-B0-4712-11	TCGA-B0-4712	HC	HC	TCGA-B0-4712-11	TCGA-B0-4712	HC	HC	TCGA-A3-3387-01	TCGA-A3-3387	I	Early
TCGA-B0-5402-11	TCGA-B0-5402	HC	HC	TCGA-B0-5402-11	TCGA-B0-5402	HC	HC	TCGA-B0-5402-11	TCGA-B0-5402	HC	HC	TCGA-B0-4700-11	TCGA-B0-4700	HC	HC
TCGA-B0-5690-11	TCGA-B0-5690	HC	HC	TCGA-B0-5690-11	TCGA-B0-5690	HC	HC	TCGA-B0-5690-11	TCGA-B0-5690	HC	HC	TCGA-B0-4700-01	TCGA-B0-4700	IV	Advanced
TCGA-B0-5691-11	TCGA-B0-5691	HC	HC	TCGA-B0-5691-11	TCGA-B0-5691	HC	HC	TCGA-B0-5691-11	TCGA-B0-5691	HC	HC	TCGA-B0-4712-11	TCGA-B0-4712	HC	HC
TCGA-B0-5694-11	TCGA-B0-5694	HC	HC	TCGA-B0-5694-11	TCGA-B0-5694	HC	HC	TCGA-B0-5694-11	TCGA-B0-5694	HC	HC	TCGA-B0-4712-01	TCGA-B0-4712	IV	Advanced
TCGA-B0-5696-11	TCGA-B0-5696	HC	HC	TCGA-B0-5696-11	TCGA-B0-5696	HC	HC	TCGA-B0-5696-11	TCGA-B0-5696	HC	HC	TCGA-B0-5402-11	TCGA-B0-5402	HC	HC
TCGA-B0-5697-11	TCGA-B0-5697	HC	HC	TCGA-B0-5697-11	TCGA-B0-5697	HC	HC	TCGA-B0-5697-11	TCGA-B0-5697	HC	HC	TCGA-B0-5402-01	TCGA-B0-5402	IV	Advanced
TCGA-B0-5699-11	TCGA-B0-5699	HC	HC	TCGA-B0-5699-11	TCGA-B0-5699	HC	HC	TCGA-B0-5699-11	TCGA-B0-5699	HC	HC	TCGA-B0-5690-11	TCGA-B0-5690	HC	HC
TCGA-B0-5701-11	TCGA-B0-5701	HC	HC	TCGA-B0-5701-11	TCGA-B0-5701	HC	HC	TCGA-B0-5701-11	TCGA-B0-5701	HC	HC	TCGA-B0-5690-01	TCGA-B0-5690	I	Early
TCGA-B0-5703-11	TCGA-B0-5703	HC	HC	TCGA-B0-5703-11	TCGA-B0-5703	HC	HC	TCGA-B0-5703-11	TCGA-B0-5703	HC	HC	TCGA-B0-5691-11	TCGA-B0-5691	HC	HC
TCGA-B0-5705-11	TCGA-B0-5705	HC	HC	TCGA-B0-5705-11	TCGA-B0-5705	HC	HC	TCGA-B0-5705-11	TCGA-B0-5705	HC	HC	TCGA-B0-5691-01	TCGA-B0-5691	I	Early
TCGA-B0-5706-11	TCGA-B0-5706	HC	HC	TCGA-B0-5706-11	TCGA-B0-5706	HC	HC	TCGA-B0-5706-11	TCGA-B0-5706	HC	HC	TCGA-B0-5694-11	TCGA-B0-5694	HC	HC
TCGA-B0-5709-11	TCGA-B0-5709	HC	HC	TCGA-B0-5709-11	TCGA-B0-5709	HC	HC	TCGA-B0-5709-11	TCGA-B0-5709	HC	HC	TCGA-B0-5694-01	TCGA-B0-5694	III	Advanced
TCGA-B0-5711-11	TCGA-B0-5711	HC	HC	TCGA-B0-5711-11	TCGA-B0-5711	HC	HC	TCGA-B0-5711-11	TCGA-B0-5711	HC	HC	TCGA-B0-5696-11	TCGA-B0-5696	HC	HC
TCGA-B0-5712-11	TCGA-B0-5712	HC	HC	TCGA-B0-5712-11	TCGA-B0-5712	HC	HC	TCGA-B0-5712-11	TCGA-B0-5712	HC	HC	TCGA-B0-5696-01	TCGA-B0-5696	III	Advanced
TCGA-B2-5636-11	TCGA-B2-5636	HC	HC	TCGA-B2-5636-11	TCGA-B2-5636	HC	HC	TCGA-B2-5636-11	TCGA-B2-5636	HC	HC	TCGA-B0-5697-11	TCGA-B0-5697	HC	HC
TCGA-B2-5641-11	TCGA-B2-5641	HC	HC	TCGA-B2-5641-11	TCGA-B2-5641	HC	HC	TCGA-B2-5641-11	TCGA-B2-5641	HC	HC	TCGA-B0-5697-01	TCGA-B0-5697	I	Early
TCGA-B8-4619-11	TCGA-B8-4619	HC	HC	TCGA-B8-4619-11	TCGA-B8-4619	HC	HC	TCGA-B8-4619-11	TCGA-B8-4619	HC	HC	TCGA-B0-5699-11	TCGA-B0-5699	HC	HC
TCGA-B8-4620-11	TCGA-B8-4620	HC	HC	TCGA-B8-4620-11	TCGA-B8-4620	HC	HC	TCGA-B8-4620-11	TCGA-B8-4620	HC	HC	TCGA-B0-5699-01	TCGA-B0-5699	I	Early
TCGA-B8-4622-11	TCGA-B8-4622	HC	HC	TCGA-B8-4622-11	TCGA-B8-4622	HC	HC	TCGA-B8-4622-11	TCGA-B8-4622	HC	HC	TCGA-B0-5701-11	TCGA-B0-5701	HC	HC
TCGA-B8-5549-11	TCGA-B8-5549	HC	HC	TCGA-B8-5549-11	TCGA-B8-5549	HC	HC	TCGA-B8-5549-11	TCGA-B8-5549	HC	HC	TCGA-B0-5701-01	TCGA-B0-5701	III	Advanced
TCGA-B8-5552-11	TCGA-B8-5552	HC	HC	TCGA-B8-5552-11	TCGA-B8-5552	HC	HC	TCGA-B8-5552-11	TCGA-B8-5552	HC	HC	TCGA-B0-5703-11	TCGA-B0-5703	HC	HC
TCGA-CJ-5672-11	TCGA-CJ-5672	HC	HC	TCGA-CJ-5672-11	TCGA-CJ-5672	HC	HC	TCGA-CJ-5672-11	TCGA-CJ-5672	HC	HC	TCGA-B0-5703-01	TCGA-B0-5703	I	Early
TCGA-CJ-5676-11	TCGA-CJ-5676	HC	HC	TCGA-CJ-5676-11	TCGA-CJ-5676	HC	HC	TCGA-CJ-5676-11	TCGA-CJ-5676	HC	HC	TCGA-B0-5705-11	TCGA-B0-5705	HC	HC
TCGA-CJ-5677-11	TCGA-CJ-5677	HC	HC	TCGA-CJ-5677-11	TCGA-CJ-5677	HC	HC	TCGA-CJ-5677-11	TCGA-CJ-5677	HC	HC	TCGA-B0-5705-01	TCGA-B0-5705	I	Early
TCGA-CJ-5678-11	TCGA-CJ-5678	HC	HC	TCGA-CJ-5678-11	TCGA-CJ-5678	HC	HC	TCGA-CJ-5678-11	TCGA-CJ-5678	HC	HC	TCGA-B0-5706-11	TCGA-B0-5706	HC	HC
TCGA-CJ-5679-11	TCGA-CJ-5679	HC	HC	TCGA-CJ-5679-11	TCGA-CJ-5679	HC	HC	TCGA-CJ-5679-11	TCGA-CJ-5679	HC	HC	TCGA-B0-5706-01	TCGA-B0-5706	II	Early
TCGA-CJ-5680-11	TCGA-CJ-5680	HC	HC	TCGA-CJ-5680-11	TCGA-CJ-5680	HC	HC	TCGA-CJ-5680-11	TCGA-CJ-5680	HC	HC	TCGA-B0-5709-11	TCGA-B0-5709	HC	HC
TCGA-CJ-5681-11	TCGA-CJ-5681	HC	HC	TCGA-CJ-5681-11	TCGA-CJ-5681	HC	HC	TCGA-CJ-5681-11	TCGA-CJ-5681	HC	HC	TCGA-B0-5709-01	TCGA-B0-5709	III	Advanced
TCGA-CJ-5689-11	TCGA-CJ-5689	HC	HC	TCGA-CJ-5689-11	TCGA-CJ-5689	HC	HC	TCGA-CJ-5689-11	TCGA-CJ-5689	HC	HC	TCGA-B0-5712-11	TCGA-B0-5712	HC	HC
TCGA-CJ-6030-11	TCGA-CJ-6030	HC	HC	TCGA-CJ-6030-11	TCGA-CJ-6030	HC	HC	TCGA-CJ-6030-11	TCGA-CJ-6030	HC	HC	TCGA-B0-5712-01	TCGA-B0-5712	IV	Advanced
TCGA-CW-5580-11	TCGA-CW-5580	HC	HC	TCGA-CJ-6033-11	TCGA-CJ-6033	HC	HC	TCGA-CW-5580-11	TCGA-CW-5580	HC	HC	TCGA-B2-5636-11	TCGA-B2-5636	HC	HC
TCGA-CW-5581-11	TCGA-CW-5581	HC	HC	TCGA-CW-5580-11	TCGA-CW-5580	HC	HC	TCGA-CW-5581-11	TCGA-CW-5581	HC	HC	TCGA-B2-5636-01	TCGA-B2-5636	I	Early
TCGA-CW-5584-11	TCGA-CW-5584	HC	HC	TCGA-CW-5581-11	TCGA-CW-5581	HC	HC	TCGA-CW-5584-11	TCGA-CW-5584	HC	HC	TCGA-B2-5641-11	TCGA-B2-5641	HC	HC
TCGA-CW-5585-11	TCGA-CW-5585	HC	HC	TCGA-CW-5584-11	TCGA-CW-5584	HC	HC	TCGA-CW-5585-11	TCGA-CW-5585	HC	HC	TCGA-B2-5641-01	TCGA-B2-5641	I	Early
TCGA-CW-5587-11	TCGA-CW-5587	HC	HC	TCGA-CW-5585-11	TCGA-CW-5585	HC	HC	TCGA-CW-5587-11	TCGA-CW-5587	HC	HC	TCGA-B8-4619-11	TCGA-B8-4619	HC	HC
TCGA-CW-5589-11	TCGA-CW-5589	HC	HC	TCGA-CW-5587-11	TCGA-CW-5587	HC	HC	TCGA-CW-5589-11	TCGA-CW-5589	HC	HC	TCGA-B8-4619-01	TCGA-B8-4619	I	Early
TCGA-CW-5591-11	TCGA-CW-5591	HC	HC	TCGA-CW-5589-11	TCGA-CW-5589	HC	HC	TCGA-CW-5591-11	TCGA-CW-5591	HC	HC	TCGA-B8-4620-11	TCGA-B8-4620	HC	HC
TCGA-CW-6087-11	TCGA-CW-6087	HC	HC	TCGA-CW-5591-11	TCGA-CW-5591	HC	HC	TCGA-CW-6087-11	TCGA-CW-6087	HC	HC	TCGA-B8-4620-01	TCGA-B8-4620	III	Advanced
TCGA-CW-6088-11	TCGA-CW-6088	HC	HC	TCGA-CW-6087-11	TCGA-CW-6087	HC	HC	TCGA-CW-6088-11	TCGA-CW-6088	HC	HC	TCGA-B8-4622-11	TCGA-B8-4622	HC	HC
TCGA-CW-6090-11	TCGA-CW-6090	HC	HC	TCGA-CW-6088-11	TCGA-CW-6088	HC	HC	TCGA-CW-6090-11	TCGA-CW-6090	HC	HC	TCGA-B8-4622-01	TCGA-B8-4622	IV	Advanced
TCGA-CZ-4863-11	TCGA-CZ-4863	HC	HC	TCGA-CW-6090-11	TCGA-CW-6090	HC	HC	TCGA-CZ-4863-11	TCGA-CZ-4863	HC	HC	TCGA-B8-5549-11	TCGA-B8-5549	HC	HC
TCGA-CZ-4864-11	TCGA-CZ-4864	HC	HC	TCGA-CZ-4863-11	TCGA-CZ-4863	HC	HC	TCGA-CZ-4864-11	TCGA-CZ-4864	HC	HC	TCGA-B8-5549-01	TCGA-B8-5549	I	Early
TCGA-CZ-4865-11	TCGA-CZ-4865	HC	HC	TCGA-CZ-4864-11	TCGA-CZ-4864	HC	HC	TCGA-CZ-4865-11	TCGA-CZ-4865	HC	HC	TCGA-B8-5552-11	TCGA-B8-5552	HC	HC
TCGA-CZ-5451-11	TCGA-CZ-5451	HC	HC	TCGA-CZ-4865-11	TCGA-CZ-4865	HC	HC	TCGA-CZ-5451-11	TCGA-CZ-5451	HC	HC	TCGA-B8-5552-01	TCGA-B8-5552	I	Early
TCGA-CZ-5452-11	TCGA-CZ-5452	HC	HC	TCGA-CZ-5451-11	TCGA-CZ-5451	HC	HC	TCGA-CZ-5452-11	TCGA-CZ-5452	HC	HC	TCGA-CJ-5672-11	TCGA-CJ-5672	HC	HC
TCGA-CZ-5453-11	TCGA-CZ-5453	HC	HC	TCGA-CZ-5452-11	TCGA-CZ-5452	HC	HC	TCGA-CZ-5453-11	TCGA-CZ-5453	HC	HC	TCGA-CJ-5672-01	TCGA-CJ-5672	I	Early
TCGA-CZ-5454-11	TCGA-CZ-5454	HC	HC	TCGA-CZ-5453-11	TCGA-CZ-5453	HC	HC	TCGA-CZ-5454-11	TCGA-CZ-5454	HC	HC	TCGA-CJ-5676-11	TCGA-CJ-5676	HC	HC
TCGA-CZ-5455-11	TCGA-CZ-5455	HC	HC	TCGA-CZ-5454-11	TCGA-CZ-5454	HC	HC	TCGA-CZ-5455-11	TCGA-CZ-5455	HC	HC	TCGA-CJ-5676-01	TCGA-CJ-5676	III	Advanced
TCGA-CZ-5456-11	TCGA-CZ-5456	HC	HC	TCGA-CZ-5455-11	TCGA-CZ-5455	HC	HC	TCGA-CZ-5456-11	TCGA-CZ-5456	HC	HC	TCGA-CJ-5677-11	TCGA-CJ-5677	HC	HC
TCGA-CZ-5457-11	TCGA-CZ-5457	HC	HC	TCGA-CZ-5456-11	TCGA-CZ-5456	HC	HC	TCGA-CZ-5457-11	TCGA-CZ-5457	HC	HC	TCGA-CJ-5677-01	TCGA-CJ-5677	IV	Advanced
TCGA-CZ-5458-11	TCGA-CZ-5458	HC	HC	TCGA-CZ-5457-11	TCGA-CZ-5457	HC	HC	TCGA-CZ-5458-11	TCGA-CZ-5458	HC	HC	TCGA-CJ-5678-11	TCGA-CJ-5678	HC	HC
TCGA-CZ-5461-11	TCGA-CZ-5461	HC	HC	TCGA-CZ-5458-11	TCGA-CZ-5458	HC	HC	TCGA-CZ-5461-11	TCGA-CZ-5461	HC	HC	TCGA-CJ-5678-01	TCGA-CJ-5678	IV	Advanced
TCGA-CZ-5462-11	TCGA-CZ-5462	HC	HC	TCGA-CZ-5461-11	TCGA-CZ-5461	HC	HC	TCGA-CZ-5462-11	TCGA-CZ-5462	HC	HC	TCGA-CJ-5679-11	TCGA-CJ-5679	HC	HC
TCGA-CZ-5463-11	TCGA-CZ-5463	HC	HC	TCGA-CZ-5462-11	TCGA-CZ-5462	HC	HC	TCGA-CZ-5463-11	TCGA-CZ-5463	HC	HC	TCGA-CJ-5679-01	TCGA-CJ-5679	III	Advanced
TCGA-CZ-5465-11	TCGA-CZ-5465	HC	HC	TCGA-CZ-5463-11	TCGA-CZ-5463	HC	HC	TCGA-CZ-5465-11	TCGA-CZ-5465	HC	HC	TCGA-CJ-5680-11	TCGA-CJ-5680	HC	HC
TCGA-CZ-5466-11	TCGA-CZ-5466	HC	HC	TCGA-CZ-5465-11	TCGA-CZ-5465	HC	HC	TCGA-CZ-5466-11	TCGA-CZ-5466	HC	HC	TCGA-CJ-5680-01	TCGA-CJ-5680	IV	Advanced
TCGA-CZ-5467-11	TCGA-CZ-5467	HC	HC	TCGA-CZ-5466-11	TCGA-CZ-5466	HC	HC	TCGA-CZ-5467-11	TCGA-CZ-5467	HC	HC	TCGA-CJ-5681-11	TCGA-CJ-5681	HC	HC
TCGA-CZ-5468-11	TCGA-CZ-5468	HC	HC	TCGA-CZ-5467-11	TCGA-CZ-5467	HC	HC	TCGA-CZ-5468-11	TCGA-CZ-5468	HC	HC	TCGA-CJ-5681-01	TCGA-CJ-5681	IV	Advanced
TCGA-CZ-5469-11	TCGA-CZ-5469	HC	HC	TCGA-CZ-5468-11	TCGA-CZ-5468	HC	HC	TCGA-CZ-5469-11	TCGA-CZ-5469	HC	HC	TCGA-CJ-5689-11	TCGA-CJ-5689	HC	HC
TCGA-CZ-5470-11	TCGA-CZ-5470	HC	HC	TCGA-CZ-5469-11	TCGA-CZ-5469	HC	HC	TCGA-CZ-5470-11	TCGA-CZ-5470	HC	HC	TCGA-CJ-5689-01	TCGA-CJ-5689	I	Early
TCGA-CZ-5982-11	TCGA-CZ-5982	HC	HC	TCGA-CZ-5470-11	TCGA-CZ-5470	HC	HC	TCGA-CZ-5982-11	TCGA-CZ-5982	HC	HC	TCGA-CJ-6030-11	TCGA-CJ-6030	HC	HC
TCGA-CZ-5984-11	TCGA-CZ-5984	HC	HC	TCGA-CZ-5982-11	TCGA-CZ-5982	HC	HC	TCGA-CZ-5984-11	TCGA-CZ-5984	HC	HC	TCGA-CJ-6030-01	TCGA-CJ-6030	I	Early
TCGA-CZ-5985-11	TCGA-CZ-5985	HC	HC	TCGA-CZ-5984-11	TCGA-CZ-5984	HC	HC	TCGA-CZ-5985-11	TCGA-CZ-5985	HC	HC	TCGA-CW-5580-11	TCGA-CW-5580	HC	HC
TCGA-CZ-5986-11	TCGA-CZ-5986	HC	HC	TCGA-CZ-5985-11	TCGA-CZ-5985	HC	HC	TCGA-CZ-5986-11	TCGA-CZ-5986	HC	HC	TCGA-CW-5580-01	TCGA-CW-5580	IV	Advanced
TCGA-CZ-5987-11	TCGA-CZ-5987	HC	HC	TCGA-CZ-5986-11	TCGA-CZ-5986	HC	HC	TCGA-CZ-5987-11	TCGA-CZ-5987	HC	HC	TCGA-CW-5581-11	TCGA-CW-5581	HC	HC
TCGA-CZ-5988-11	TCGA-CZ-5988	HC	HC	TCGA-CZ-5987-11	TCGA-CZ-5987	HC	HC	TCGA-CZ-5988-11	TCGA-CZ-5988	HC	HC	TCGA-CW-5581-01	TCGA-CW-5581	I	Early
TCGA-CZ-5989-11	TCGA-CZ-5989	HC	HC	TCGA-CZ-5988-11	TCGA-CZ-5988	HC	HC	TCGA-CZ-5989-11	TCGA-CZ-5989	HC	HC	TCGA-CW-5584-11	TCGA-CW-5584	HC	HC
TCGA-3Z-A93Z-01	TCGA-3Z-A93Z	I	Early	TCGA-CZ-5989-11	TCGA-CZ-5989	HC	HC	TCGA-3Z-A93Z-01	TCGA-3Z-A93Z	I	Early	TCGA-CW-5584-01	TCGA-CW-5584	III	Advanced
TCGA-6D-AA2E-01	TCGA-6D-AA2E	I	Early	TCGA-3Z-A93Z-01	TCGA-3Z-A93Z	I	Early	TCGA-6D-AA2E-01	TCGA-6D-AA2E	I	Early	TCGA-CW-5585-11	TCGA-CW-5585	HC	HC
TCGA-A3-3311-01	TCGA-A3-3311	I	Early	TCGA-6D-AA2E-01	TCGA-6D-AA2E	I	Early	TCGA-A3-3311-01	TCGA-A3-3	I	Early	TCGA-CW-5585-01	TCGA-CW-5585	IV	Advanced
TCGA-A3-3313-01	TCGA-A3-3313	I	Early	TCGA-A3-3306-01	TCGA-A3-3306	I	Early	TCGA-A3-3313-01	TCGA-A3-3313	I	Early	TCGA-CW-5587-11	TCGA-CW-5587	HC	HC
TCGA-A3-3319-01	TCGA-A3-3319	I	Early	TCGA-A3-3311-01	TCGA-A3-3311	I	Early	TCGA-A3-3319-01	TCGA-A3-3319	I	Early	TCGA-CW-5587-01	TCGA-CW-5587	III	Advanced
TCGA-A3-3320-01	TCGA-A3-3320	I	Early	TCGA-A3-3313-01	TCGA-A3-3313	I	Early	TCGA-A3-3320-01	TCGA-A3-3320	I	Early	TCGA-CW-5589-11	TCGA-CW-5589	HC	HC
TCGA-A3-3322-01	TCGA-A3-3322	I	Early	TCGA-A3-3319-01	TCGA-A3-3319	I	Early	TCGA-A3-3322-01	TCGA-A3-3322	I	Early	TCGA-CW-5589-01	TCGA-CW-5589	I	Early
TCGA-A3-3323-01	TCGA-A3-3323	I	Early	TCGA-A3-3320-01	TCGA-A3-3320	I	Early	TCGA-A3-3323-01	TCGA-A3-3323	I	Early	TCGA-CW-5591-11	TCGA-CW-5591	HC	HC
TCGA-A3-3324-01	TCGA-A3-3324	I	Early	TCGA-A3-3322-01	TCGA-A3-3322	I	Early	TCGA-A3-3324-01	TCGA-A3-3324	I	Early	TCGA-CW-5591-01	TCGA-CW-5591	IV	Advanced
TCGA-A3-3326-01	TCGA-A3-3326	I	Early	TCGA-A3-3323-01	TCGA-A3-3323	I	Early	TCGA-A3-3326-01	TCGA-A3-3326	I	Early	TCGA-CW-6087-11	TCGA-CW-6087	HC	HC
TCGA-A3-3331-01	TCGA-A3-3331	I	Early	TCGA-A3-3324-01	TCGA-A3-3324	I	Early	TCGA-A3-3331-01	TCGA-A3-3331	I	Early	TCGA-CW-6087-01	TCGA-CW-6087	IV	Advanced
TCGA-A3-3346-01	TCGA-A3-3346	I	Early	TCGA-A3-3325-01	TCGA-A3-3325	I	Early	TCGA-A3-3346-01	TCGA-A3-3346	I	Early	TCGA-CW-6088-11	TCGA-CW-6088	HC	HC
TCGA-A3-3349-01	TCGA-A3-3349	I	Early	TCGA-A3-3326-01	TCGA-A3-3326	I	Early	TCGA-A3-3349-01	TCGA-A3-3349	I	Early	TCGA-CW-6088-01	TCGA-CW-6088	I	Early
TCGA-A3-3358-01	TCGA-A3-3358	I	Early	TCGA-A3-3328-01	TCGA-A3-3328	I	Early	TCGA-A3-3358-01	TCGA-A3-3358	I	Early	TCGA-CW-6090-11	TCGA-CW-6090	HC	HC
TCGA-A3-3362-01	TCGA-A3-3362	I	Early	TCGA-A3-3329-01	TCGA-A3-3329	I	Early	TCGA-A3-3362-01	TCGA-A3-3362	I	Early	TCGA-CW-6090-01	TCGA-CW-6090	I	Early
TCGA-A3-3365-01	TCGA-A3-3365	I	Early	TCGA-A3-3331-01	TCGA-A3-3331	I	Early	TCGA-A3-3365-01	TCGA-A3-3365	I	Early	TCGA-CZ-4863-11	TCGA-CZ-4863	HC	HC
TCGA-A3-3367-01	TCGA-A3-3367	I	Early	TCGA-A3-3346-01	TCGA-A3-3346	I	Early	TCGA-A3-3367-01	TCGA-A3-3367	I	Early	TCGA-CZ-4863-01	TCGA-CZ-4863	III	Advanced
TCGA-A3-3370-01	TCGA-A3-3370	I	Early	TCGA-A3-3349-01	TCGA-A3-3349	I	Early	TCGA-A3-3370-01	TCGA-A3-3370	I	Early	TCGA-CZ-4864-11	TCGA-CZ-4864	HC	HC
TCGA-A3-3373-01	TCGA-A3-3373	I	Early	TCGA-A3-3358-01	TCGA-A3-3358	I	Early	TCGA-A3-3373-01	TCGA-A3-3373	I	Early	TCGA-CZ-4864-01	TCGA-CZ-4864	II	Early
TCGA-A3-3374-01	TCGA-A3-3374	I	Early	TCGA-A3-3359-01	TCGA-A3-3359	I	Early	TCGA-A3-3374-01	TCGA-A3-3374	I	Early	TCGA-CZ-4865-11	TCGA-CZ-4865	HC	HC
TCGA-A3-3376-01	TCGA-A3-3376	I	Early	TCGA-A3-3362-01	TCGA-A3-3362	I	Early	TCGA-A3-3376-01	TCGA-A3-3376	I	Early	TCGA-CZ-4865-01	TCGA-CZ-4865	I	Early
TCGA-A3-3378-01	TCGA-A3-3378	I	Early	TCGA-A3-3365-01	TCGA-A3-3365	I	Early	TCGA-A3-3378-01	TCGA-A3-3378	I	Early	TCGA-CZ-5451-11	TCGA-CZ-5451	HC	HC
TCGA-A3-3380-01	TCGA-A3-3380	I	Early	TCGA-A3-3367-01	TCGA-A3-3367	I	Early	TCGA-A3-3380-01	TCGA-A3-3380	I	Early	TCGA-CZ-5451-01	TCGA-CZ-5451	II	Early
TCGA-A3-3382-01	TCGA-A3-3382	I	Early	TCGA-A3-3370-01	TCGA-A3-3370	I	Early	TCGA-A3-3382-01	TCGA-A3-3382	I	Early	TCGA-CZ-5452-11	TCGA-CZ-5452	HC	HC
TCGA-A3-3383-01	TCGA-A3-3383	I	Early	TCGA-A3-3373-01	TCGA-A3-3373	I	Early	TCGA-A3-3383-01	TCGA-A3-3383	I	Early	TCGA-CZ-5452-01	TCGA-CZ-5452	II	Early
TCGA-A3-3385-01	TCGA-A3-3385	I	Early	TCGA-A3-3374-01	TCGA-A3-3374	I	Early	TCGA-A3-3385-01	TCGA-A3-3385	I	Early	TCGA-CZ-5453-11	TCGA-CZ-5453	HC	HC
TCGA-A3-3387-01	TCGA-A3-3387	I	Early	TCGA-A3-3376-01	TCGA-A3-3376	I	Early	TCGA-A3-3387-01	TCGA-A3-3387	I	Early	TCGA-CZ-5453-01	TCGA-CZ-5453	II	Early
TCGA-A3-A6NI-01	TCGA-A3-A6NI	I	Early	TCGA-A3-3378-01	TCGA-A3-3378	I	Early	TCGA-A3-A6NI-01	TCGA-A3-A6NI	I	Early	TCGA-CZ-5454-11	TCGA-CZ-5454	HC	HC
TCGA-A3-A6NJ-01	TCGA-A3-A6NJ	I	Early	TCGA-A3-3380-01	TCGA-A3-3380	I	Early	TCGA-A3-A6NJ-01	TCGA-A3-A6NJ	I	Early	TCGA-CZ-5454-01	TCGA-CZ-5454	IV	Advanced
TCGA-A3-A6NL-01	TCGA-A3-A6NL	I	Early	TCGA-A3-3382-01	TCGA-A3-3382	I	Early	TCGA-A3-A6NL-01	TCGA-A3-A6NL	I	Early	TCGA-CZ-5455-11	TCGA-CZ-5455	HC	HC
TCGA-A3-A6NN-01	TCGA-A3-A6NN	I	Early	TCGA-A3-3383-01	TCGA-A3-3383	I	Early	TCGA-A3-A6NN-01	TCGA-A3-A6NN	I	Early	TCGA-CZ-5455-01	TCGA-CZ-5455	IV	Advanced
TCGA-A3-A8CQ-01	TCGA-A3-A8CQ	I	Early	TCGA-A3-3385-01	TCGA-A3-3385	I	Early	TCGA-A3-A8CQ-01	TCGA-A3-A8CQ	I	Early	TCGA-CZ-5456-11	TCGA-CZ-5456	HC	HC
TCGA-A3-A8OU-01	TCGA-A3-A8OU	I	Early	TCGA-A3-3387-01	TCGA-A3-3387	I	Early	TCGA-A3-A8OU-01	TCGA-A3-A8OU	I	Early	TCGA-CZ-5456-01	TCGA-CZ-5456	II	Early
TCGA-A3-A8OV-01	TCGA-A3-A8OV	I	Early	TCGA-A3-A6NI-01	TCGA-A3-A6NI	I	Early	TCGA-A3-A8OV-01	TCGA-A3-A8OV	I	Early	TCGA-CZ-5457-11	TCGA-CZ-5457	HC	HC
TCGA-A3-A8OX-01	TCGA-A3-A8OX	I	Early	TCGA-A3-A6NJ-01	TCGA-A3-A6NJ	I	Early	TCGA-A3-A8OX-01	TCGA-A3-A8OX	I	Early	TCGA-CZ-5457-01	TCGA-CZ-5457	III	Advanced
TCGA-AK-3425-01	TCGA-AK-3425	I	Early	TCGA-A3-A6NL-01	TCGA-A3-A6NL	I	Early	TCGA-AK-3425-01	TCGA-AK-3425	I	Early	TCGA-CZ-5458-11	TCGA-CZ-5458	HC	HC
TCGA-AK-3427-01	TCGA-AK-3427	I	Early	TCGA-A3-A6NN-01	TCGA-A3-A6NN	I	Early	TCGA-AK-3427-01	TCGA-AK-3427	I	Early	TCGA-CZ-5458-01	TCGA-CZ-5458	III	Advanced
TCGA-AK-3434-01	TCGA-AK-3434	I	Early	TCGA-A3-A8CQ-01	TCGA-A3-A8CQ	I	Early	TCGA-AK-3434-01	TCGA-AK-3434	I	Early	TCGA-CZ-5461-11	TCGA-CZ-5461	HC	HC
TCGA-AK-3440-01	TCGA-AK-3440	I	Early	TCGA-A3-A8OU-01	TCGA-A3-A8OU	I	Early	TCGA-AK-3440-01	TCGA-AK-3440	I	Early	TCGA-CZ-5461-01	TCGA-CZ-5461	IV	Advanced
TCGA-AK-3444-01	TCGA-AK-3444	I	Early	TCGA-A3-A8OV-01	TCGA-A3-A8OV	I	Early	TCGA-AK-3450-01	TCGA-AK-3450	I	Early	TCGA-CZ-5462-11	TCGA-CZ-5462	HC	HC
TCGA-AK-3450-01	TCGA-AK-3450	I	Early	TCGA-A3-A8OX-01	TCGA-A3-A8OX	I	Early	TCGA-AK-3454-01	TCGA-AK-3454	I	Early	TCGA-CZ-5462-01	TCGA-CZ-5462	IV	Advanced
TCGA-AK-3454-01	TCGA-AK-3454	I	Early	TCGA-AK-3425-01	TCGA-AK-3425	I	Early	TCGA-AK-3458-01	TCGA-AK-3458	I	Early	TCGA-CZ-5463-11	TCGA-CZ-5463	HC	HC
TCGA-AK-3458-01	TCGA-AK-3458	I	Early	TCGA-AK-3427-01	TCGA-AK-3427	I	Early	TCGA-AK-3460-01	TCGA-AK-3460	I	Early	TCGA-CZ-5463-01	TCGA-CZ-5463	II	Early
TCGA-AK-3460-01	TCGA-AK-3460	I	Early	TCGA-AK-3434-01	TCGA-AK-3434	I	Early	TCGA-AK-3461-01	TCGA-AK-3461	I	Early	TCGA-CZ-5465-11	TCGA-CZ-5465	HC	HC
TCGA-AK-3461-01	TCGA-AK-3461	I	Early	TCGA-AK-3440-01	TCGA-AK-3440	I	Early	TCGA-AK-3465-01	TCGA-AK-3465	I	Early	TCGA-CZ-5465-01	TCGA-CZ-5465	III	Advanced
TCGA-AK-3465-01	TCGA-AK-3465	I	Early	TCGA-AK-3450-01	TCGA-AK-3450	I	Early	TCGA-AS-3777-01	TCGA-AS-3777	I	Early	TCGA-CZ-5466-11	TCGA-CZ-5466	HC	HC
TCGA-AS-3777-01	TCGA-AS-3777	I	Early	TCGA-AK-3454-01	TCGA-AK-3454	I	Early	TCGA-B0-4823-01	TCGA-B0-4823	I	Early	TCGA-CZ-5466-01	TCGA-CZ-5466	III	Advanced
TCGA-B0-4823-01	TCGA-B0-4823	I	Early	TCGA-AK-3458-01	TCGA-AK-3458	I	Early	TCGA-B0-4824-01	TCGA-B0-4824	I	Early	TCGA-CZ-5467-11	TCGA-CZ-5467	HC	HC
TCGA-B0-4824-01	TCGA-B0-4824	I	Early	TCGA-AK-3460-01	TCGA-AK-3460	I	Early	TCGA-B0-4833-01	TCGA-B0-4833	I	Early	TCGA-CZ-5467-01	TCGA-CZ-5467	III	Advanced
TCGA-B0-4833-01	TCGA-B0-4833	I	Early	TCGA-AK-3461-01	TCGA-AK-3461	I	Early	TCGA-B0-4834-01	TCGA-B0-4834	I	Early	TCGA-CZ-5468-11	TCGA-CZ-5468	HC	HC
TCGA-B0-4834-01	TCGA-B0-4834	I	Early	TCGA-AK-3465-01	TCGA-AK-3465	I	Early	TCGA-B0-4837-01	TCGA-B0-4837	I	Early	TCGA-CZ-5468-01	TCGA-CZ-5468	IV	Advanced
TCGA-B0-4837-01	TCGA-B0-4837	I	Early	TCGA-AS-3777-01	TCGA-AS-3777	I	Early	TCGA-B0-4838-01	TCGA-B0-4838	I	Early	TCGA-CZ-5469-11	TCGA-CZ-5469	HC	HC
TCGA-B0-4838-01	TCGA-B0-4838	I	Early	TCGA-AS-3778-01	TCGA-AS-3778	I	Early	TCGA-B0-4839-01	TCGA-B0-4839	I	Early	TCGA-CZ-5469-01	TCGA-CZ-5469	II	Early
TCGA-B0-4839-01	TCGA-B0-4839	I	Early	TCGA-B0-4823-01	TCGA-B0-4823	I	Early	TCGA-B0-4945-01	TCGA-B0-4945	I	Early	TCGA-CZ-5470-11	TCGA-CZ-5470	HC	HC
TCGA-B0-4945-01	TCGA-B0-4945	I	Early	TCGA-B0-4824-01	TCGA-B0-4824	I	Early	TCGA-B0-5077-01	TCGA-B0-5077	I	Early	TCGA-CZ-5470-01	TCGA-CZ-5470	II	Early
TCGA-B0-5077-01	TCGA-B0-5077	I	Early	TCGA-B0-4833-01	TCGA-B0-4833	I	Early	TCGA-B0-5083-01	TCGA-B0-5083	I	Early	TCGA-CZ-5982-11	TCGA-CZ-5982	HC	HC
TCGA-B0-5083-01	TCGA-B0-5083	I	Early	TCGA-B0-4834-01	TCGA-B0-4834	I	Early	TCGA-B0-5088-01	TCGA-B0-5088	I	Early	TCGA-CZ-5982-01	TCGA-CZ-5982	I	Early
TCGA-B0-5088-01	TCGA-B0-5088	I	Early	TCGA-B0-4837-01	TCGA-B0-4837	I	Early	TCGA-B0-5098-01	TCGA-B0-5098	I	Early	TCGA-CZ-5984-11	TCGA-CZ-5984	HC	HC
TCGA-B0-5098-01	TCGA-B0-5098	I	Early	TCGA-B0-4838-01	TCGA-B0-4838	I	Early	TCGA-B0-5102-01	TCGA-B0-5102	I	Early	TCGA-CZ-5984-01	TCGA-CZ-5984	I	Early
TCGA-B0-5102-01	TCGA-B0-5102	I	Early	TCGA-B0-4839-01	TCGA-B0-4839	I	Early	TCGA-B0-5104-01	TCGA-B0-5104	I	Early	TCGA-CZ-5985-11	TCGA-CZ-5985	HC	HC
TCGA-B0-5104-01	TCGA-B0-5104	I	Early	TCGA-B0-4945-01	TCGA-B0-4945	I	Early	TCGA-B0-5106-01	TCGA-B0-5106	I	Early	TCGA-CZ-5985-01	TCGA-CZ-5985	II	Early
TCGA-B0-5106-01	TCGA-B0-5106	I	Early	TCGA-B0-5077-01	TCGA-B0-5077	I	Early	TCGA-B0-5110-01	TCGA-B0-5110	I	Early	TCGA-CZ-5986-11	TCGA-CZ-5986	HC	HC
TCGA-B0-5110-01	TCGA-B0-5110	I	Early	TCGA-B0-5083-01	TCGA-B0-5083	I	Early	TCGA-B0-5117-01	TCGA-B0-5117	I	Early	TCGA-CZ-5986-01	TCGA-CZ-5986	I	Early
TCGA-B0-5117-01	TCGA-B0-5117	I	Early	TCGA-B0-5088-01	TCGA-B0-5088	I	Early	TCGA-B0-5119-01	TCGA-B0-5119	I	Early	TCGA-CZ-5987-11	TCGA-CZ-5987	HC	HC
TCGA-B0-5119-01	TCGA-B0-5119	I	Early	TCGA-B0-5098-01	TCGA-B0-5098	I	Early	TCGA-B0-5120-01	TCGA-B0-5120	I	Early	TCGA-CZ-5987-01	TCGA-CZ-5987	IV	Advanced
TCGA-B0-5120-01	TCGA-B0-5120	I	Early	TCGA-B0-5102-01	TCGA-B0-5102	I	Early	TCGA-B0-5121-01	TCGA-B0-5121	I	Early	TCGA-CZ-5988-11	TCGA-CZ-5988	HC	HC
TCGA-B0-5121-01	TCGA-B0-5121	I	Early	TCGA-B0-5104-01	TCGA-B0-5104	I	Early	TCGA-B0-5399-01	TCGA-B0-5399	I	Early	TCGA-CZ-5988-01	TCGA-CZ-5988	I	Early
TCGA-B0-5399-01	TCGA-B0-5399	I	Early	TCGA-B0-5106-01	TCGA-B0-5106	I	Early	TCGA-B0-5690-01	TCGA-B0-5690	I	Early	TCGA-CZ-5989-11	TCGA-CZ-5989	HC	HC
TCGA-B0-5690-01	TCGA-B0-5690	I	Early	TCGA-B0-5110-01	TCGA-B0-5110	I	Early	TCGA-B0-5691-01	TCGA-B0-5691	I	Early	TCGA-CZ-5989-01	TCGA-CZ-5989	II	Early
TCGA-B0-5691-01	TCGA-B0-5691	I	Early	TCGA-B0-5117-01	TCGA-B0-5117	I	Early	TCGA-B0-5693-01	TCGA-B0-5693	I	Early
TCGA-B0-5693-01	TCGA-B0-5693	I	Early	TCGA-B0-5119-01	TCGA-B0-5119	I	Early	TCGA-B0-5695-01	TCGA-B0-5695	I	Early
TCGA-B0-5695-01	TCGA-B0-5695	I	Early	TCGA-B0-5120-01	TCGA-B0-5120	I	Early	TCGA-B0-5697-01	TCGA-B0-5697	I	Early
TCGA-B0-5697-01	TCGA-B0-5697	I	Early	TCGA-B0-5121-01	TCGA-B0-5121	I	Early	TCGA-B0-5698-01	TCGA-B0-5698	I	Early
TCGA-B0-5698-01	TCGA-B0-5698	I	Early	TCGA-B0-5399-01	TCGA-B0-5399	I	Early	TCGA-B0-5699-01	TCGA-B0-5699	I	Early
TCGA-B0-5699-01	TCGA-B0-5699	I	Early	TCGA-B0-5690-01	TCGA-B0-5690	I	Early	TCGA-B0-5700-01	TCGA-B0-5700	I	Early
TCGA-B0-5700-01	TCGA-B0-5700	I	Early	TCGA-B0-5691-01	TCGA-B0-5691	I	Early	TCGA-B0-5702-01	TCGA-B0-5702	I	Early
TCGA-B0-5702-01	TCGA-B0-5702	I	Early	TCGA-B0-5693-01	TCGA-B0-5693	I	Early	TCGA-B0-5703-01	TCGA-B0-5703	I	Early
TCGA-B0-5703-01	TCGA-B0-5703	I	Early	TCGA-B0-5695-01	TCGA-B0-5695	I	Early	TCGA-B0-5705-01	TCGA-B0-5705	I	Early
TCGA-B0-5705-01	TCGA-B0-5705	I	Early	TCGA-B0-5697-01	TCGA-B0-5697	I	Early	TCGA-B0-5707-01	TCGA-B0-5707	I	Early
TCGA-B0-5707-01	TCGA-B0-5707	I	Early	TCGA-B0-5698-01	TCGA-B0-5698	I	Early	TCGA-B0-5710-01	TCGA-B0-5710	I	Early
TCGA-B0-5710-01	TCGA-B0-5710	I	Early	TCGA-B0-5699-01	TCGA-B0-5699	I	Early	TCGA-B0-5812-01	TCGA-B0-5812	I	Early
TCGA-B0-5812-01	TCGA-B0-5812	I	Early	TCGA-B0-5700-01	TCGA-B0-5700	I	Early	TCGA-B2-3924-01	TCGA-B2-3924	I	Early
TCGA-B2-3924-01	TCGA-B2-3924	I	Early	TCGA-B0-5702-01	TCGA-B0-5702	I	Early	TCGA-B2-4098-01	TCGA-B2-4098	I	Early
TCGA-B2-4098-01	TCGA-B2-4098	I	Early	TCGA-B0-5703-01	TCGA-B0-5703	I	Early	TCGA-B2-4099-01	TCGA-B2-4099	I	Early
TCGA-B2-4099-01	TCGA-B2-4099	I	Early	TCGA-B0-5705-01	TCGA-B0-5705	I	Early	TCGA-B2-4102-01	TCGA-B2-4102	I	Early
TCGA-B2-4102-01	TCGA-B2-4102	I	Early	TCGA-B0-5707-01	TCGA-B0-5707	I	Early	TCGA-B2-5633-01	TCGA-B2-5633	I	Early
TCGA-B2-5633-01	TCGA-B2-5633	I	Early	TCGA-B0-5710-01	TCGA-B0-5710	I	Early	TCGA-B2-5635-01	TCGA-B2-5635	I	Early
TCGA-B2-5635-01	TCGA-B2-5635	I	Early	TCGA-B0-5812-01	TCGA-B0-5812	I	Early	TCGA-B2-5636-01	TCGA-B2-5636	I	Early
TCGA-B2-5636-01	TCGA-B2-5636	I	Early	TCGA-B2-3924-01	TCGA-B2-3924	I	Early	TCGA-B2-5641-01	TCGA-B2-5641	I	Early
TCGA-B2-5641-01	TCGA-B2-5641	I	Early	TCGA-B2-4098-01	TCGA-B2-4098	I	Early	TCGA-B4-5378-01	TCGA-B4-5378	I	Early
TCGA-B4-5378-01	TCGA-B4-5378	I	Early	TCGA-B2-4099-01	TCGA-B2-4099	I	Early	TCGA-B4-5834-01	TCGA-B4-5834	I	Early
TCGA-B4-5834-01	TCGA-B4-5834	I	Early	TCGA-B2-4102-01	TCGA-B2-4102	I	Early	TCGA-B4-5835-01	TCGA-B4-5835	I	Early
TCGA-B4-5835-01	TCGA-B4-5835	I	Early	TCGA-B2-5633-01	TCGA-B2-5633	I	Early	TCGA-B4-5836-01	TCGA-B4-5836	I	Early
TCGA-B4-5836-01	TCGA-B4-5836	I	Early	TCGA-B2-5635-01	TCGA-B2-5635	I	Early	TCGA-B4-5843-01	TCGA-B4-5843	I	Early
TCGA-B4-5843-01	TCGA-B4-5843	I	Early	TCGA-B2-5636-01	TCGA-B2-5636	I	Early	TCGA-B8-4146-01	TCGA-B8-4146	I	Early
TCGA-B8-4146-01	TCGA-B8-4146	I	Early	TCGA-B2-5641-01	TCGA-B2-5641	I	Early	TCGA-B8-4148-01	TCGA-B8-4148	I	Early
TCGA-B8-4148-01	TCGA-B8-4148	I	Early	TCGA-B4-5378-01	TCGA-B4-5378	I	Early	TCGA-B8-4154-01	TCGA-B8-4154	I	Early
TCGA-B8-4154-01	TCGA-B8-4154	I	Early	TCGA-B4-5834-01	TCGA-B4-5834	I	Early	TCGA-B8-4619-01	TCGA-B8-4619	I	Early
TCGA-B8-4619-01	TCGA-B8-4619	I	Early	TCGA-B4-5835-01	TCGA-B4-5835	I	Early	TCGA-B8-4621-01	TCGA-B8-4621	I	Early
TCGA-B8-4621-01	TCGA-B8-4621	I	Early	TCGA-B4-5836-01	TCGA-B4-5836	I	Early	TCGA-B8-5159-01	TCGA-B8-5159	I	Early
TCGA-B8-5159-01	TCGA-B8-5159	I	Early	TCGA-B4-5843-01	TCGA-B4-5843	I	Early	TCGA-B8-5165-01	TCGA-B8-5165	I	Early
TCGA-B8-5165-01	TCGA-B8-5165	I	Early	TCGA-B8-4146-01	TCGA-B8-4146	I	Early	TCGA-B8-5545-01	TCGA-B8-5545	I	Early
TCGA-B8-5545-01	TCGA-B8-5545	I	Early	TCGA-B8-4148-01	TCGA-B8-4148	I	Early	TCGA-B8-5546-01	TCGA-B8-5546	I	Early
TCGA-B8-5546-01	TCGA-B8-5546	I	Early	TCGA-B8-4154-01	TCGA-B8-4154	I	Early	TCGA-B8-5549-01	TCGA-B8-5549	I	Early
TCGA-B8-5549-01	TCGA-B8-5549	I	Early	TCGA-B8-4619-01	TCGA-B8-4619	I	Early	TCGA-B8-5551-01	TCGA-B8-5551	I	Early
TCGA-B8-5551-01	TCGA-B8-5551	I	Early	TCGA-B8-4621-01	TCGA-B8-4621	I	Early	TCGA-B8-5552-01	TCGA-B8-5552	I	Early
TCGA-B8-5552-01	TCGA-B8-5552	I	Early	TCGA-B8-5159-01	TCGA-B8-5159	I	Early	TCGA-B8-5553-01	TCGA-B8-5553	I	Early
TCGA-B8-5553-01	TCGA-B8-5553	I	Early	TCGA-B8-5165-01	TCGA-B8-5165	I	Early	TCGA-B8-A54E-01	TCGA-B8-A54E	I	Early
TCGA-B8-A54E-01	TCGA-B8-A54E	I	Early	TCGA-B8-5545-01	TCGA-B8-5545	I	Early	TCGA-B8-A54F-01	TCGA-B8-A54F	I	Early
TCGA-B8-A54F-01	TCGA-B8-A54F	I	Early	TCGA-B8-5546-01	TCGA-B8-5546	I	Early	TCGA-B8-A54G-01	TCGA-B8-A54G	I	Early
TCGA-B8-A54G-01	TCGA-B8-A54G	I	Early	TCGA-B8-5549-01	TCGA-B8-5549	I	Early	TCGA-B8-A54I-01	TCGA-B8-A54I	I	Early
TCGA-B8-A54I-01	TCGA-B8-A54I	I	Early	TCGA-B8-5551-01	TCGA-B8-5551	I	Early	TCGA-B8-A54K-01	TCGA-B8-A54K	I	Early
TCGA-B8-A54K-01	TCGA-B8-A54K	I	Early	TCGA-B8-5552-01	TCGA-B8-5552	I	Early	TCGA-B8-A7U6-01	TCGA-B8-A7U6	I	Early
TCGA-B8-A7U6-01	TCGA-B8-A7U6	I	Early	TCGA-B8-5553-01	TCGA-B8-5553	I	Early	TCGA-B8-A8YJ-01	TCGA-B8-A8YJ	I	Early
TCGA-B8-A8YJ-01	TCGA-B8-A8YJ	I	Early	TCGA-B8-A54E-01	TCGA-B8-A54E	I	Early	TCGA-BP-4158-01	TCGA-BP-4158	I	Early
TCGA-BP-4158-01	TCGA-BP-4158	I	Early	TCGA-B8-A54F-01	TCGA-B8-A54F	I	Early	TCGA-BP-4159-01	TCGA-BP-4159	I	Early
TCGA-BP-4159-01	TCGA-BP-4159	I	Early	TCGA-B8-A54G-01	TCGA-B8-A54G	I	Early	TCGA-BP-4161-01	TCGA-BP-4161	I	Early
TCGA-BP-4161-01	TCGA-BP-4161	I	Early	TCGA-B8-A54I-01	TCGA-B8-A54I	I	Early	TCGA-BP-4162-01	TCGA-BP-4162	I	Early
TCGA-BP-4162-01	TCGA-BP-4162	I	Early	TCGA-B8-A54K-01	TCGA-B8-A54K	I	Early	TCGA-BP-4165-01	TCGA-BP-4165	I	Early
TCGA-BP-4165-01	TCGA-BP-4165	I	Early	TCGA-B8-A7U6-01	TCGA-B8-A7U6	I	Early	TCGA-BP-4176-01	TCGA-BP-4176	I	Early
TCGA-BP-4176-01	TCGA-BP-4176	I	Early	TCGA-B8-A8YJ-01	TCGA-B8-A8YJ	I	Early	TCGA-BP-4177-01	TCGA-BP-4177	I	Early
TCGA-BP-4177-01	TCGA-BP-4177	I	Early	TCGA-BP-4158-01	TCGA-BP-4158	I	Early	TCGA-BP-4325-01	TCGA-BP-4325	I	Early
TCGA-BP-4325-01	TCGA-BP-4325	I	Early	TCGA-BP-4159-01	TCGA-BP-4159	I	Early	TCGA-BP-4326-01	TCGA-BP-4326	I	Early
TCGA-BP-4326-01	TCGA-BP-4326	I	Early	TCGA-BP-4161-01	TCGA-BP-4161	I	Early	TCGA-BP-4331-01	TCGA-BP-4331	I	Early
TCGA-BP-4331-01	TCGA-BP-4331	I	Early	TCGA-BP-4162-01	TCGA-BP-4162	I	Early	TCGA-BP-4338-01	TCGA-BP-4338	I	Early
TCGA-BP-4338-01	TCGA-BP-4338	I	Early	TCGA-BP-4165-01	TCGA-BP-4165	I	Early	TCGA-BP-4340-01	TCGA-BP-4340	I	Early
TCGA-BP-4340-01	TCGA-BP-4340	I	Early	TCGA-BP-4170-01	TCGA-BP-4170	I	Early	TCGA-BP-4344-01	TCGA-BP-4344	I	Early
TCGA-BP-4344-01	TCGA-BP-4344	I	Early	TCGA-BP-4176-01	TCGA-BP-4176	I	Early	TCGA-BP-4353-01	TCGA-BP-4353	I	Early
TCGA-BP-4353-01	TCGA-BP-4353	I	Early	TCGA-BP-4177-01	TCGA-BP-4177	I	Early	TCGA-BP-4756-01	TCGA-BP-4756	I	Early
TCGA-BP-4756-01	TCGA-BP-4756	I	Early	TCGA-BP-4325-01	TCGA-BP-4325	I	Early	TCGA-BP-4758-01	TCGA-BP-4758	I	Early
TCGA-BP-4758-01	TCGA-BP-4758	I	Early	TCGA-BP-4326-01	TCGA-BP-4326	I	Early	TCGA-BP-4759-01	TCGA-BP-4759	I	Early
TCGA-BP-4759-01	TCGA-BP-4759	I	Early	TCGA-BP-4331-01	TCGA-BP-4331	I	Early	TCGA-BP-4760-01	TCGA-BP-4760	I	Early
TCGA-BP-4760-01	TCGA-BP-4760	I	Early	TCGA-BP-4338-01	TCGA-BP-4338	I	Early	TCGA-BP-4762-01	TCGA-BP-4762	I	Early
TCGA-BP-4762-01	TCGA-BP-4762	I	Early	TCGA-BP-4340-01	TCGA-BP-4340	I	Early	TCGA-BP-4763-01	TCGA-BP-4763	I	Early
TCGA-BP-4763-01	TCGA-BP-4763	I	Early	TCGA-BP-4344-01	TCGA-BP-4344	I	Early	TCGA-BP-4765-01	TCGA-BP-4765	I	Early
TCGA-BP-4765-01	TCGA-BP-4765	I	Early	TCGA-BP-4349-01	TCGA-BP-4349	I	Early	TCGA-BP-4766-01	TCGA-BP-4766	I	Early
TCGA-BP-4766-01	TCGA-BP-4766	I	Early	TCGA-BP-4353-01	TCGA-BP-4353	I	Early	TCGA-BP-4768-01	TCGA-BP-4768	I	Early
TCGA-BP-4768-01	TCGA-BP-4768	I	Early	TCGA-BP-4756-01	TCGA-BP-4756	I	Early	TCGA-BP-4769-01	TCGA-BP-4769	I	Early
TCGA-BP-4769-01	TCGA-BP-4769	I	Early	TCGA-BP-4758-01	TCGA-BP-4758	I	Early	TCGA-BP-4775-01	TCGA-BP-4775	I	Early
TCGA-BP-4775-01	TCGA-BP-4775	I	Early	TCGA-BP-4759-01	TCGA-BP-4759	I	Early	TCGA-BP-4776-01	TCGA-BP-4776	I	Early
TCGA-BP-4776-01	TCGA-BP-4776	I	Early	TCGA-BP-4760-01	TCGA-BP-4760	I	Early	TCGA-BP-4777-01	TCGA-BP-4777	I	Early
TCGA-BP-4777-01	TCGA-BP-4777	I	Early	TCGA-BP-4762-01	TCGA-BP-4762	I	Early	TCGA-BP-4781-01	TCGA-BP-4781	I	Early
TCGA-BP-4781-01	TCGA-BP-4781	I	Early	TCGA-BP-4763-01	TCGA-BP-4763	I	Early	TCGA-BP-4782-01	TCGA-BP-4782	I	Early
TCGA-BP-4782-01	TCGA-BP-4782	I	Early	TCGA-BP-4765-01	TCGA-BP-4765	I	Early	TCGA-BP-4789-01	TCGA-BP-4789	I	Early
TCGA-BP-4789-01	TCGA-BP-4789	I	Early	TCGA-BP-4766-01	TCGA-BP-4766	I	Early	TCGA-BP-4790-01	TCGA-BP-4790	I	Early
TCGA-BP-4790-01	TCGA-BP-4790	I	Early	TCGA-BP-4768-01	TCGA-BP-4768	I	Early	TCGA-BP-4795-01	TCGA-BP-4795	I	Early
TCGA-BP-4795-01	TCGA-BP-4795	I	Early	TCGA-BP-4769-01	TCGA-BP-4769	I	Early	TCGA-BP-4801-01	TCGA-BP-4801	I	Early
TCGA-BP-4801-01	TCGA-BP-4801	I	Early	TCGA-BP-4774-01	TCGA-BP-4774	I	Early	TCGA-BP-4804-01	TCGA-BP-4804	I	Early
TCGA-BP-4804-01	TCGA-BP-4804	I	Early	TCGA-BP-4775-01	TCGA-BP-4775	I	Early	TCGA-BP-4807-01	TCGA-BP-4807	I	Early
TCGA-BP-4807-01	TCGA-BP-4807	I	Early	TCGA-BP-4776-01	TCGA-BP-4776	I	Early	TCGA-BP-4959-01	TCGA-BP-4959	I	Early
TCGA-BP-4959-01	TCGA-BP-4959	I	Early	TCGA-BP-4777-01	TCGA-BP-4777	I	Early	TCGA-BP-4961-01	TCGA-BP-4961	I	Early
TCGA-BP-4961-01	TCGA-BP-4961	I	Early	TCGA-BP-4781-01	TCGA-BP-4781	I	Early	TCGA-BP-4963-01	TCGA-BP-4963	I	Early
TCGA-BP-4963-01	TCGA-BP-4963	I	Early	TCGA-BP-4782-01	TCGA-BP-4782	I	Early	TCGA-BP-4965-01	TCGA-BP-4965	I	Early
TCGA-BP-4965-01	TCGA-BP-4965	I	Early	TCGA-BP-4784-01	TCGA-BP-4784	I	Early	TCGA-BP-4968-01	TCGA-BP-4968	I	Early
TCGA-BP-4968-01	TCGA-BP-4968	I	Early	TCGA-BP-4789-01	TCGA-BP-4789	I	Early	TCGA-BP-4969-01	TCGA-BP-4969	I	Early
TCGA-BP-4969-01	TCGA-BP-4969	I	Early	TCGA-BP-4790-01	TCGA-BP-4790	I	Early	TCGA-BP-4975-01	TCGA-BP-4975	I	Early
TCGA-BP-4975-01	TCGA-BP-4975	I	Early	TCGA-BP-4795-01	TCGA-BP-4795	I	Early	TCGA-BP-4976-01	TCGA-BP-4976	I	Early
TCGA-BP-4976-01	TCGA-BP-4976	I	Early	TCGA-BP-4801-01	TCGA-BP-4801	I	Early	TCGA-BP-4977-01	TCGA-BP-4977	I	Early
TCGA-BP-4977-01	TCGA-BP-4977	I	Early	TCGA-BP-4804-01	TCGA-BP-4804	I	Early	TCGA-BP-4982-01	TCGA-BP-4982	I	Early
TCGA-BP-4982-01	TCGA-BP-4982	I	Early	TCGA-BP-4807-01	TCGA-BP-4807	I	Early	TCGA-BP-4986-01	TCGA-BP-4986	I	Early
TCGA-BP-4986-01	TCGA-BP-4986	I	Early	TCGA-BP-4959-01	TCGA-BP-4959	I	Early	TCGA-BP-4987-01	TCGA-BP-4987	I	Early
TCGA-BP-4987-01	TCGA-BP-4987	I	Early	TCGA-BP-4961-01	TCGA-BP-4961	I	Early	TCGA-BP-4991-01	TCGA-BP-4991	I	Early
TCGA-BP-4988-01	TCGA-BP-4988	I	Early	TCGA-BP-4963-01	TCGA-BP-4963	I	Early	TCGA-BP-4992-01	TCGA-BP-4992	I	Early
TCGA-BP-4991-01	TCGA-BP-4991	I	Early	TCGA-BP-4964-01	TCGA-BP-4964	I	Early	TCGA-BP-4993-01	TCGA-BP-4993	I	Early
TCGA-BP-4992-01	TCGA-BP-4992	I	Early	TCGA-BP-4965-01	TCGA-BP-4965	I	Early	TCGA-BP-4994-01	TCGA-BP-4994	I	Early
TCGA-BP-4993-01	TCGA-BP-4993	I	Early	TCGA-BP-4968-01	TCGA-BP-4968	I	Early	TCGA-BP-4995-01	TCGA-BP-4995	I	Early
TCGA-BP-4994-01	TCGA-BP-4994	I	Early	TCGA-BP-4969-01	TCGA-BP-4969	I	Early	TCGA-BP-4998-01	TCGA-BP-4998	I	Early
TCGA-BP-4995-01	TCGA-BP-4995	I	Early	TCGA-BP-4975-01	TCGA-BP-4975	I	Early	TCGA-BP-5000-01	TCGA-BP-5000	I	Early
TCGA-BP-4998-01	TCGA-BP-4998	I	Early	TCGA-BP-4976-01	TCGA-BP-4976	I	Early	TCGA-BP-5001-01	TCGA-BP-5001	I	Early
TCGA-BP-5000-01	TCGA-BP-5000	I	Early	TCGA-BP-4977-01	TCGA-BP-4977	I	Early	TCGA-BP-5004-01	TCGA-BP-5004	I	Early
TCGA-BP-5001-01	TCGA-BP-5001	I	Early	TCGA-BP-4982-01	TCGA-BP-4982	I	Early	TCGA-BP-5008-01	TCGA-BP-5008	I	Early
TCGA-BP-5004-01	TCGA-BP-5004	I	Early	TCGA-BP-4986-01	TCGA-BP-4986	I	Early	TCGA-BP-5009-01	TCGA-BP-5009	I	Early
TCGA-BP-5008-01	TCGA-BP-5008	I	Early	TCGA-BP-4987-01	TCGA-BP-4987	I	Early	TCGA-BP-5168-01	TCGA-BP-5168	I	Early
TCGA-BP-5009-01	TCGA-BP-5009	I	Early	TCGA-BP-4991-01	TCGA-BP-4991	I	Early	TCGA-BP-5169-01	TCGA-BP-5169	I	Early
TCGA-BP-5168-01	TCGA-BP-5168	I	Early	TCGA-BP-4992-01	TCGA-BP-4992	I	Early	TCGA-BP-5170-01	TCGA-BP-5170	I	Early
TCGA-BP-5169-01	TCGA-BP-5169	I	Early	TCGA-BP-4993-01	TCGA-BP-4993	I	Early	TCGA-BP-5173-01	TCGA-BP-5173	I	Early
TCGA-BP-5170-01	TCGA-BP-5170	I	Early	TCGA-BP-4994-01	TCGA-BP-4994	I	Early	TCGA-BP-5174-01	TCGA-BP-5174	I	Early
TCGA-BP-5173-01	TCGA-BP-5173	I	Early	TCGA-BP-4995-01	TCGA-BP-4995	I	Early	TCGA-BP-5175-01	TCGA-BP-5175	I	Early
TCGA-BP-5174-01	TCGA-BP-5174	I	Early	TCGA-BP-4998-01	TCGA-BP-4998	I	Early	TCGA-BP-5176-01	TCGA-BP-5176	I	Early
TCGA-BP-5175-01	TCGA-BP-5175	I	Early	TCGA-BP-4999-01	TCGA-BP-4999	I	Early	TCGA-BP-5177-01	TCGA-BP-5177	I	Early
TCGA-BP-5176-01	TCGA-BP-5176	I	Early	TCGA-BP-5000-01	TCGA-BP-5000	I	Early	TCGA-BP-5180-01	TCGA-BP-5180	I	Early
TCGA-BP-5177-01	TCGA-BP-5177	I	Early	TCGA-BP-5001-01	TCGA-BP-5001	I	Early	TCGA-BP-5181-01	TCGA-BP-5181	I	Early
TCGA-BP-5180-01	TCGA-BP-5180	I	Early	TCGA-BP-5004-01	TCGA-BP-5004	I	Early	TCGA-BP-5182-01	TCGA-BP-5182	I	Early
TCGA-BP-5181-01	TCGA-BP-5181	I	Early	TCGA-BP-5006-01	TCGA-BP-5006	I	Early	TCGA-BP-5184-01	TCGA-BP-5184	I	Early
TCGA-BP-5182-01	TCGA-BP-5182	I	Early	TCGA-BP-5008-01	TCGA-BP-5008	I	Early	TCGA-BP-5185-01	TCGA-BP-5185	I	Early
TCGA-BP-5184-01	TCGA-BP-5184	I	Early	TCGA-BP-5009-01	TCGA-BP-5009	I	Early	TCGA-BP-5186-01	TCGA-BP-5186	I	Early
TCGA-BP-5185-01	TCGA-BP-5185	I	Early	TCGA-BP-5168-01	TCGA-BP-5168	I	Early	TCGA-BP-5187-01	TCGA-BP-5187	I	Early
TCGA-BP-5186-01	TCGA-BP-5186	I	Early	TCGA-BP-5169-01	TCGA-BP-5169	I	Early	TCGA-BP-5189-01	TCGA-BP-5189	I	Early
TCGA-BP-5187-01	TCGA-BP-5187	I	Early	TCGA-BP-5170-01	TCGA-BP-5170	I	Early	TCGA-BP-5190-01	TCGA-BP-5190	I	Early
TCGA-BP-5189-01	TCGA-BP-5189	I	Early	TCGA-BP-5173-01	TCGA-BP-5173	I	Early	TCGA-BP-5192-01	TCGA-BP-5192	I	Early
TCGA-BP-5190-01	TCGA-BP-5190	I	Early	TCGA-BP-5174-01	TCGA-BP-5174	I	Early	TCGA-BP-5194-01	TCGA-BP-5194	I	Early
TCGA-BP-5192-01	TCGA-BP-5192	I	Early	TCGA-BP-5175-01	TCGA-BP-5175	I	Early	TCGA-BP-5195-01	TCGA-BP-5195	I	Early
TCGA-BP-5194-01	TCGA-BP-5194	I	Early	TCGA-BP-5176-01	TCGA-BP-5176	I	Early	TCGA-BP-5196-01	TCGA-BP-5196	I	Early
TCGA-BP-5195-01	TCGA-BP-5195	I	Early	TCGA-BP-5177-01	TCGA-BP-5177	I	Early	TCGA-CJ-4634-01	TCGA-CJ-4634	I	Early
TCGA-BP-5196-01	TCGA-BP-5196	I	Early	TCGA-BP-5180-01	TCGA-BP-5180	I	Early	TCGA-CJ-4635-01	TCGA-CJ-4635	I	Early
TCGA-CJ-4634-01	TCGA-CJ-4634	I	Early	TCGA-BP-5181-01	TCGA-BP-5181	I	Early	TCGA-CJ-4872-01	TCGA-CJ-4872	I	Early
TCGA-CJ-4635-01	TCGA-CJ-4635	I	Early	TCGA-BP-5182-01	TCGA-BP-5182	I	Early	TCGA-CJ-4886-01	TCGA-CJ-4886	I	Early
TCGA-CJ-4872-01	TCGA-CJ-4872	I	Early	TCGA-BP-5184-01	TCGA-BP-5184	I	Early	TCGA-CJ-4889-01	TCGA-CJ-4889	I	Early
TCGA-CJ-4886-01	TCGA-CJ-4886	I	Early	TCGA-BP-5185-01	TCGA-BP-5185	I	Early	TCGA-CJ-4892-01	TCGA-CJ-4892	I	Early
TCGA-CJ-4889-01	TCGA-CJ-4889	I	Early	TCGA-BP-5186-01	TCGA-BP-5186	I	Early	TCGA-CJ-4893-01	TCGA-CJ-4893	I	Early
TCGA-CJ-4892-01	TCGA-CJ-4892	I	Early	TCGA-BP-5187-01	TCGA-BP-5187	I	Early	TCGA-CJ-4899-01	TCGA-CJ-4899	I	Early
TCGA-CJ-4893-01	TCGA-CJ-4893	I	Early	TCGA-BP-5189-01	TCGA-BP-5189	I	Early	TCGA-CJ-4903-01	TCGA-CJ-4903	I	Early
TCGA-CJ-4899-01	TCGA-CJ-4899	I	Early	TCGA-BP-5190-01	TCGA-BP-5190	I	Early	TCGA-CJ-4905-01	TCGA-CJ-4905	I	Early
TCGA-CJ-4903-01	TCGA-CJ-4903	I	Early	TCGA-BP-5192-01	TCGA-BP-5192	I	Early	TCGA-CJ-4908-01	TCGA-CJ-4908	I	Early
TCGA-CJ-4905-01	TCGA-CJ-4905	I	Early	TCGA-BP-5194-01	TCGA-BP-5194	I	Early	TCGA-CJ-4920-01	TCGA-CJ-4920	I	Early
TCGA-CJ-4908-01	TCGA-CJ-4908	I	Early	TCGA-BP-5195-01	TCGA-BP-5195	I	Early	TCGA-CJ-5671-01	TCGA-CJ-5671	I	Early
TCGA-CJ-4920-01	TCGA-CJ-4920	I	Early	TCGA-BP-5196-01	TCGA-BP-5196	I	Early	TCGA-CJ-5672-01	TCGA-CJ-5672	I	Early
TCGA-CJ-5671-01	TCGA-CJ-5671	I	Early	TCGA-CJ-4634-01	TCGA-CJ-4634	I	Early	TCGA-CJ-5683-01	TCGA-CJ-5683	I	Early
TCGA-CJ-5672-01	TCGA-CJ-5672	I	Early	TCGA-CJ-4635-01	TCGA-CJ-4635	I	Early	TCGA-CJ-5686-01	TCGA-CJ-5686	I	Early
TCGA-CJ-5683-01	TCGA-CJ-5683	I	Early	TCGA-CJ-4872-01	TCGA-CJ-4872	I	Early	TCGA-CJ-5689-01	TCGA-CJ-5689	I	Early
TCGA-CJ-5686-01	TCGA-CJ-5686	I	Early	TCGA-CJ-4874-01	TCGA-CJ-4874	I	Early	TCGA-CJ-6027-01	TCGA-CJ-6027	I	Early
TCGA-CJ-5689-01	TCGA-CJ-5689	I	Early	TCGA-CJ-4886-01	TCGA-CJ-4886	I	Early	TCGA-CJ-6030-01	TCGA-CJ-6030	I	Early
TCGA-CJ-6027-01	TCGA-CJ-6027	I	Early	TCGA-CJ-4889-01	TCGA-CJ-4889	I	Early	TCGA-CJ-6031-01	TCGA-CJ-6031	I	Early
TCGA-CJ-6030-01	TCGA-CJ-6030	I	Early	TCGA-CJ-4892-01	TCGA-CJ-4892	I	Early	TCGA-CW-5581-01	TCGA-CW-5581	I	Early
TCGA-CJ-6031-01	TCGA-CJ-6031	I	Early	TCGA-CJ-4893-01	TCGA-CJ-4893	I	Early	TCGA-CW-5583-01	TCGA-CW-5583	I	Early
TCGA-CW-5581-01	TCGA-CW-5581	I	Early	TCGA-CJ-4899-01	TCGA-CJ-4899	I	Early	TCGA-CW-5588-01	TCGA-CW-5588	I	Early
TCGA-CW-5583-01	TCGA-CW-5583	I	Early	TCGA-CJ-4903-01	TCGA-CJ-4903	I	Early	TCGA-CW-5589-01	TCGA-CW-5589	I	Early
TCGA-CW-5588-01	TCGA-CW-5588	I	Early	TCGA-CJ-4905-01	TCGA-CJ-4905	I	Early	TCGA-CW-6088-01	TCGA-CW-6088	I	Early
TCGA-CW-5589-01	TCGA-CW-5589	I	Early	TCGA-CJ-4908-01	TCGA-CJ-4908	I	Early	TCGA-CW-6090-01	TCGA-CW-6090	I	Early
TCGA-CW-6088-01	TCGA-CW-6088	I	Early	TCGA-CJ-4920-01	TCGA-CJ-4920	I	Early	TCGA-CW-6093-01	TCGA-CW-6093	I	Early
TCGA-CW-6090-01	TCGA-CW-6090	I	Early	TCGA-CJ-5671-01	TCGA-CJ-5671	I	Early	TCGA-CZ-4853-01	TCGA-CZ-4853	I	Early
TCGA-CW-6093-01	TCGA-CW-6093	I	Early	TCGA-CJ-5672-01	TCGA-CJ-5672	I	Early	TCGA-CZ-4854-01	TCGA-CZ-4854	I	Early
TCGA-CZ-4853-01	TCGA-CZ-4853	I	Early	TCGA-CJ-5683-01	TCGA-CJ-5683	I	Early	TCGA-CZ-4856-01	TCGA-CZ-4856	I	Early
TCGA-CZ-4854-01	TCGA-CZ-4854	I	Early	TCGA-CJ-5686-01	TCGA-CJ-5686	I	Early	TCGA-CZ-4859-01	TCGA-CZ-4859	I	Early
TCGA-CZ-4856-01	TCGA-CZ-4856	I	Early	TCGA-CJ-5689-01	TCGA-CJ-5689	I	Early	TCGA-CZ-4862-01	TCGA-CZ-4862	I	Early
TCGA-CZ-4859-01	TCGA-CZ-4859	I	Early	TCGA-CJ-6027-01	TCGA-CJ-6027	I	Early	TCGA-CZ-4865-01	TCGA-CZ-4865	I	Early
TCGA-CZ-4862-01	TCGA-CZ-4862	I	Early	TCGA-CJ-6030-01	TCGA-CJ-6030	I	Early	TCGA-CZ-4866-01	TCGA-CZ-4866	I	Early
TCGA-CZ-4865-01	TCGA-CZ-4865	I	Early	TCGA-CJ-6031-01	TCGA-CJ-6031	I	Early	TCGA-CZ-5982-01	TCGA-CZ-5982	I	Early
TCGA-CZ-4866-01	TCGA-CZ-4866	I	Early	TCGA-CW-5581-01	TCGA-CW-5581	I	Early	TCGA-CZ-5984-01	TCGA-CZ-5984	I	Early
TCGA-CZ-5982-01	TCGA-CZ-5982	I	Early	TCGA-CW-5583-01	TCGA-CW-5583	I	Early	TCGA-CZ-5986-01	TCGA-CZ-5986	I	Early
TCGA-CZ-5984-01	TCGA-CZ-5984	I	Early	TCGA-CW-5588-01	TCGA-CW-5588	I	Early	TCGA-CZ-5988-01	TCGA-CZ-5988	I	Early
TCGA-CZ-5986-01	TCGA-CZ-5986	I	Early	TCGA-CW-5589-01	TCGA-CW-5589	I	Early	TCGA-DV-5565-01	TCGA-DV-5565	I	Early
TCGA-CZ-5988-01	TCGA-CZ-5988	I	Early	TCGA-CW-6088-01	TCGA-CW-6088	I	Early	TCGA-DV-5566-01	TCGA-DV-5566	I	Early
TCGA-DV-5565-01	TCGA-DV-5565	I	Early	TCGA-CW-6090-01	TCGA-CW-6090	I	Early	TCGA-DV-5567-01	TCGA-DV-5567	I	Early
TCGA-DV-5566-01	TCGA-DV-5566	I	Early	TCGA-CW-6093-01	TCGA-CW-6093	I	Early	TCGA-DV-5568-01	TCGA-DV-5568	I	Early
TCGA-DV-5567-01	TCGA-DV-5567	I	Early	TCGA-CZ-4853-01	TCGA-CZ-4853	I	Early	TCGA-DV-5569-01	TCGA-DV-5569	I	Early
TCGA-DV-5568-01	TCGA-DV-5568	I	Early	TCGA-CZ-4854-01	TCGA-CZ-4854	I	Early	TCGA-DV-5573-01	TCGA-DV-5573	I	Early
TCGA-DV-5569-01	TCGA-DV-5569	I	Early	TCGA-CZ-4856-01	TCGA-CZ-4856	I	Early	TCGA-DV-5574-01	TCGA-DV-5574	I	Early
TCGA-DV-5573-01	TCGA-DV-5573	I	Early	TCGA-CZ-4859-01	TCGA-CZ-4859	I	Early	TCGA-DV-5575-01	TCGA-DV-5575	I	Early
TCGA-DV-5574-01	TCGA-DV-5574	I	Early	TCGA-CZ-4862-01	TCGA-CZ-4862	I	Early	TCGA-DV-5576-01	TCGA-DV-5576	I	Early
TCGA-DV-5575-01	TCGA-DV-5575	I	Early	TCGA-CZ-4865-01	TCGA-CZ-4865	I	Early	TCGA-DV-A4VZ-01	TCGA-DV-A4VZ	I	Early
TCGA-DV-5576-01	TCGA-DV-5576	I	Early	TCGA-CZ-4866-01	TCGA-CZ-4866	I	Early	TCGA-DV-A4W0-01	TCGA-DV-A4W0	I	Early
TCGA-DV-A4VZ-01	TCGA-DV-A4VZ	I	Early	TCGA-CZ-5982-01	TCGA-CZ-5982	I	Early	TCGA-EU-5904-01	TCGA-EU-5904	I	Early
TCGA-DV-A4W0-01	TCGA-DV-A4W0	I	Early	TCGA-CZ-5984-01	TCGA-CZ-5984	I	Early	TCGA-EU-5905-01	TCGA-EU-5905	I	Early
TCGA-EU-5904-01	TCGA-EU-5904	I	Early	TCGA-CZ-5986-01	TCGA-CZ-5986	I	Early	TCGA-EU-5906-01	TCGA-EU-5906	I	Early
TCGA-EU-5905-01	TCGA-EU-5905	I	Early	TCGA-CZ-5988-01	TCGA-CZ-5988	I	Early	TCGA-G6-A8L7-01	TCGA-G6-A8L7	I	Early
TCGA-EU-5906-01	TCGA-EU-5906	I	Early	TCGA-DV-5565-01	TCGA-DV-5565	I	Early	TCGA-G6-A8L8-01	TCGA-G6-A8L8	I	Early
TCGA-G6-A8L7-01	TCGA-G6-A8L7	I	Early	TCGA-DV-5566-01	TCGA-DV-5566	I	Early	TCGA-GK-A6C7-01	TCGA-GK-A6C7	I	Early
TCGA-G6-A8L8-01	TCGA-G6-A8L8	I	Early	TCGA-DV-5567-01	TCGA-DV-5567	I	Early	TCGA-MM-A84U-01	TCGA-MM-A84U	I	Early
TCGA-GK-A6C7-01	TCGA-GK-A6C7	I	Early	TCGA-DV-5568-01	TCGA-DV-5568	I	Early	TCGA-MW-A4EC-01	TCGA-MW-A4EC	I	Early
TCGA-MM-A84U-01	TCGA-MM-A84U	I	Early	TCGA-DV-5569-01	TCGA-DV-5569	I	Early	TCGA-T7-A92I-01	TCGA-T7-A92I	I	Early
TCGA-MW-A4EC-01	TCGA-MW-A4EC	I	Early	TCGA-DV-5573-01	TCGA-DV-5573	I	Early	TCGA-A3-3316-01	TCGA-A3-3316	II	Early
TCGA-T7-A92I-01	TCGA-T7-A92I	I	Early	TCGA-DV-5574-01	TCGA-DV-5574	I	Early	TCGA-A3-3317-01	TCGA-A3-3317	II	Early
TCGA-A3-3316-01	TCGA-A3-3316	II	Early	TCGA-DV-5575-01	TCGA-DV-5575	I	Early	TCGA-A3-3351-01	TCGA-A3-3351	II	Early
TCGA-A3-3317-01	TCGA-A3-3317	II	Early	TCGA-DV-5576-01	TCGA-DV-5576	I	Early	TCGA-A3-3357-01	TCGA-A3-3357	II	Early
TCGA-A3-3351-01	TCGA-A3-3351	II	Early	TCGA-DV-A4VZ-01	TCGA-DV-A4VZ	I	Early	TCGA-A3-3363-01	TCGA-A3-3363	II	Early
TCGA-A3-3357-01	TCGA-A3-3357	II	Early	TCGA-DV-A4W0-01	TCGA-DV-A4W0	I	Early	TCGA-AK-3429-01	TCGA-AK-3429	II	Early
TCGA-A3-3363-01	TCGA-A3-3363	II	Early	TCGA-EU-5904-01	TCGA-EU-5904	I	Early	TCGA-AK-3431-01	TCGA-AK-3431	II	Early
TCGA-AK-3429-01	TCGA-AK-3429	II	Early	TCGA-EU-5905-01	TCGA-EU-5905	I	Early	TCGA-AK-3433-01	TCGA-AK-3433	II	Early
TCGA-AK-3431-01	TCGA-AK-3431	II	Early	TCGA-EU-5906-01	TCGA-EU-5906	I	Early	TCGA-AK-3443-01	TCGA-AK-3443	II	Early
TCGA-AK-3433-01	TCGA-AK-3433	II	Early	TCGA-G6-A8L7-01	TCGA-G6-A8L7	I	Early	TCGA-AK-3447-01	TCGA-AK-3447	II	Early
TCGA-AK-3443-01	TCGA-AK-3443	II	Early	TCGA-G6-A8L8-01	TCGA-G6-A8L8	I	Early	TCGA-AK-3451-01	TCGA-AK-3451	II	Early
TCGA-AK-3447-01	TCGA-AK-3447	II	Early	TCGA-GK-A6C7-01	TCGA-GK-A6C7	I	Early	TCGA-AK-3453-01	TCGA-AK-3453	II	Early
TCGA-AK-3451-01	TCGA-AK-3451	II	Early	TCGA-MM-A84U-01	TCGA-MM-A84U	I	Early	TCGA-AK-3456-01	TCGA-AK-3456	II	Early
TCGA-AK-3453-01	TCGA-AK-3453	II	Early	TCGA-MW-A4EC-01	TCGA-MW-A4EC	I	Early	TCGA-B0-4816-01	TCGA-B0-4816	II	Early
TCGA-AK-3456-01	TCGA-AK-3456	II	Early	TCGA-T7-A92I-01	TCGA-T7-A92I	I	Early	TCGA-B0-4818-01	TCGA-B0-4818	II	Early
TCGA-B0-4816-01	TCGA-B0-4816	II	Early	TCGA-A3-3316-01	TCGA-A3-3316	II	Early	TCGA-B0-4822-01	TCGA-B0-4822	II	Early
TCGA-B0-4818-01	TCGA-B0-4818	II	Early	TCGA-A3-3317-01	TCGA-A3-3317	II	Early	TCGA-B0-4852-01	TCGA-B0-4852	II	Early
TCGA-B0-4822-01	TCGA-B0-4822	II	Early	TCGA-A3-3335-01	TCGA-A3-3335	II	Early	TCGA-B0-5706-01	TCGA-B0-5706	II	Early
TCGA-B0-4852-01	TCGA-B0-4852	II	Early	TCGA-A3-3343-01	TCGA-A3-3343	II	Early	TCGA-B2-3923-01	TCGA-B2-3923	II	Early
TCGA-B0-5706-01	TCGA-B0-5706	II	Early	TCGA-A3-3351-01	TCGA-A3-3351	II	Early	TCGA-B2-4101-01	TCGA-B2-4101	II	Early
TCGA-B2-3923-01	TCGA-B2-3923	II	Early	TCGA-A3-3357-01	TCGA-A3-3357	II	Early	TCGA-B2-A4SR-01	TCGA-B2-A4SR	II	Early
TCGA-B2-4101-01	TCGA-B2-4101	II	Early	TCGA-A3-3363-01	TCGA-A3-3363	II	Early	TCGA-B4-5844-01	TCGA-B4-5844	II	Early
TCGA-B2-A4SR-01	TCGA-B2-A4SR	II	Early	TCGA-AK-3429-01	TCGA-AK-3429	II	Early	TCGA-B8-5162-01	TCGA-B8-5162	II	Early
TCGA-B4-5844-01	TCGA-B4-5844	II	Early	TCGA-AK-3431-01	TCGA-AK-3431	II	Early	TCGA-B8-A54H-01	TCGA-B8-A54H	II	Early
TCGA-B8-5162-01	TCGA-B8-5162	II	Early	TCGA-AK-3433-01	TCGA-AK-3433	II	Early	TCGA-B8-A54J-01	TCGA-B8-A54J	II	Early
TCGA-B8-A54H-01	TCGA-B8-A54H	II	Early	TCGA-AK-3443-01	TCGA-AK-3443	II	Early	TCGA-BP-4169-01	TCGA-BP-4169	II	Early
TCGA-B8-A54J-01	TCGA-B8-A54J	II	Early	TCGA-AK-3447-01	TCGA-AK-3447	II	Early	TCGA-BP-4173-01	TCGA-BP-4173	II	Early
TCGA-BP-4169-01	TCGA-BP-4169	II	Early	TCGA-AK-3451-01	TCGA-AK-3451	II	Early	TCGA-BP-4174-01	TCGA-BP-4174	II	Early
TCGA-BP-4173-01	TCGA-BP-4173	II	Early	TCGA-AK-3453-01	TCGA-AK-3453	II	Early	TCGA-BP-4327-01	TCGA-BP-4327	II	Early
TCGA-BP-4174-01	TCGA-BP-4174	II	Early	TCGA-AK-3456-01	TCGA-AK-3456	II	Early	TCGA-BP-4342-01	TCGA-BP-4342	II	Early
TCGA-BP-4327-01	TCGA-BP-4327	II	Early	TCGA-B0-4816-01	TCGA-B0-4816	II	Early	TCGA-BP-4960-01	TCGA-BP-4960	II	Early
TCGA-BP-4342-01	TCGA-BP-4342	II	Early	TCGA-B0-4818-01	TCGA-B0-4818	II	Early	TCGA-BP-4962-01	TCGA-BP-4962	II	Early
TCGA-BP-4960-01	TCGA-BP-4960	II	Early	TCGA-B0-4822-01	TCGA-B0-4822	II	Early	TCGA-BP-5007-01	TCGA-BP-5007	II	Early
TCGA-BP-4962-01	TCGA-BP-4962	II	Early	TCGA-B0-4852-01	TCGA-B0-4852	II	Early	TCGA-BP-5199-01	TCGA-BP-5199	II	Early
TCGA-BP-5007-01	TCGA-BP-5007	II	Early	TCGA-B0-5706-01	TCGA-B0-5706	II	Early	TCGA-BP-5200-01	TCGA-BP-5200	II	Early
TCGA-BP-5199-01	TCGA-BP-5199	II	Early	TCGA-B2-3923-01	TCGA-B2-3923	II	Early	TCGA-CJ-4639-01	TCGA-CJ-4639	II	Early
TCGA-BP-5200-01	TCGA-BP-5200	II	Early	TCGA-B2-4101-01	TCGA-B2-4101	II	Early	TCGA-CJ-4642-01	TCGA-CJ-4642	II	Early
TCGA-CJ-4639-01	TCGA-CJ-4639	II	Early	TCGA-B2-A4SR-01	TCGA-B2-A4SR	II	Early	TCGA-CJ-4643-01	TCGA-CJ-4643	II	Early
TCGA-CJ-4642-01	TCGA-CJ-4642	II	Early	TCGA-B4-5844-01	TCGA-B4-5844	II	Early	TCGA-CJ-4876-01	TCGA-CJ-4876	II	Early
TCGA-CJ-4643-01	TCGA-CJ-4643	II	Early	TCGA-B8-5162-01	TCGA-B8-5162	II	Early	TCGA-CJ-4912-01	TCGA-CJ-4912	II	Early
TCGA-CJ-4876-01	TCGA-CJ-4876	II	Early	TCGA-B8-A54H-01	TCGA-B8-A54H	II	Early	TCGA-CJ-5675-01	TCGA-CJ-5675	II	Early
TCGA-CJ-4912-01	TCGA-CJ-4912	II	Early	TCGA-B8-A54J-01	TCGA-B8-A54J	II	Early	TCGA-CJ-6032-01	TCGA-CJ-6032	II	Early
TCGA-CJ-5675-01	TCGA-CJ-5675	II	Early	TCGA-BP-4169-01	TCGA-BP-4169	II	Early	TCGA-CZ-4858-01	TCGA-CZ-4858	II	Early
TCGA-CJ-6032-01	TCGA-CJ-6032	II	Early	TCGA-BP-4173-01	TCGA-BP-4173	II	Early	TCGA-CZ-4861-01	TCGA-CZ-4861	II	Early
TCGA-CZ-4858-01	TCGA-CZ-4858	II	Early	TCGA-BP-4174-01	TCGA-BP-4174	II	Early	TCGA-CZ-4864-01	TCGA-CZ-4864	II	Early
TCGA-CZ-4861-01	TCGA-CZ-4861	II	Early	TCGA-BP-4327-01	TCGA-BP-4327	II	Early	TCGA-CZ-5451-01	TCGA-CZ-5451	II	Early
TCGA-CZ-4864-01	TCGA-CZ-4864	II	Early	TCGA-BP-4342-01	TCGA-BP-4342	II	Early	TCGA-CZ-5452-01	TCGA-CZ-5452	II	Early
TCGA-CZ-5451-01	TCGA-CZ-5451	II	Early	TCGA-BP-4960-01	TCGA-BP-4960	II	Early	TCGA-CZ-5453-01	TCGA-CZ-5453	II	Early
TCGA-CZ-5452-01	TCGA-CZ-5452	II	Early	TCGA-BP-4962-01	TCGA-BP-4962	II	Early	TCGA-CZ-5456-01	TCGA-CZ-5456	II	Early
TCGA-CZ-5453-01	TCGA-CZ-5453	II	Early	TCGA-BP-5007-01	TCGA-BP-5007	II	Early	TCGA-CZ-5463-01	TCGA-CZ-5463	II	Early
TCGA-CZ-5456-01	TCGA-CZ-5456	II	Early	TCGA-BP-5199-01	TCGA-BP-5199	II	Early	TCGA-CZ-5469-01	TCGA-CZ-5469	II	Early
TCGA-CZ-5463-01	TCGA-CZ-5463	II	Early	TCGA-BP-5200-01	TCGA-BP-5200	II	Early	TCGA-CZ-5470-01	TCGA-CZ-5470	II	Early
TCGA-CZ-5469-01	TCGA-CZ-5469	II	Early	TCGA-CJ-4639-01	TCGA-CJ-4639	II	Early	TCGA-CZ-5985-01	TCGA-CZ-5985	II	Early
TCGA-CZ-5470-01	TCGA-CZ-5470	II	Early	TCGA-CJ-4642-01	TCGA-CJ-4642	II	Early	TCGA-CZ-5989-01	TCGA-CZ-5989	II	Early
TCGA-CZ-5985-01	TCGA-CZ-5985	II	Early	TCGA-CJ-4643-01	TCGA-CJ-4643	II	Early	TCGA-MM-A564-01	TCGA-MM-A564	II	Early
TCGA-CZ-5989-01	TCGA-CZ-5989	II	Early	TCGA-CJ-4876-01	TCGA-CJ-4876	II	Early	TCGA-A3-3307-01	TCGA-A3-3307	III	Advanced
TCGA-MM-A564-01	TCGA-MM-A564	II	Early	TCGA-CJ-4912-01	TCGA-CJ-4912	II	Early	TCGA-A3-3308-01	TCGA-A3-3308	III	Advanced
TCGA-A3-3307-01	TCGA-A3-3307	III	Advanced	TCGA-CJ-5675-01	TCGA-CJ-5675	II	Early	TCGA-A3-3347-01	TCGA-A3-3347	III	Advanced
TCGA-A3-3308-01	TCGA-A3-3308	III	Advanced	TCGA-CJ-6032-01	TCGA-CJ-6032	II	Early	TCGA-A3-3372-01	TCGA-A3-3372	III	Advanced
TCGA-A3-3347-01	TCGA-A3-3347	III	Advanced	TCGA-CZ-4858-01	TCGA-CZ-4858	II	Early	TCGA-A3-A8OW-01	TCGA-A3-A8OW	III	Advanced
TCGA-A3-3372-01	TCGA-A3-3372	III	Advanced	TCGA-CZ-4861-01	TCGA-CZ-4861	II	Early	TCGA-AK-3426-01	TCGA-AK-3426	III	Advanced
TCGA-A3-A8OW-01	TCGA-A3-A8OW	III	Advanced	TCGA-CZ-4864-01	TCGA-CZ-4864	II	Early	TCGA-AK-3428-01	TCGA-AK-3428	III	Advanced
TCGA-AK-3426-01	TCGA-AK-3426	III	Advanced	TCGA-CZ-5451-01	TCGA-CZ-5451	II	Early	TCGA-AK-3445-01	TCGA-AK-3445	III	Advanced
TCGA-AK-3428-01	TCGA-AK-3428	III	Advanced	TCGA-CZ-5452-01	TCGA-CZ-5452	II	Early	TCGA-AK-3455-01	TCGA-AK-3455	III	Advanced
TCGA-AK-3430-01	TCGA-AK-3430	III	Advanced	TCGA-CZ-5453-01	TCGA-CZ-5453	II	Early	TCGA-B0-4693-01	TCGA-B0-4693	III	Advanced
TCGA-AK-3445-01	TCGA-AK-3445	III	Advanced	TCGA-CZ-5456-01	TCGA-CZ-5456	II	Early	TCGA-B0-4694-01	TCGA-B0-4694	III	Advanced
TCGA-AK-3455-01	TCGA-AK-3455	III	Advanced	TCGA-CZ-5463-01	TCGA-CZ-5463	II	Early	TCGA-B0-4696-01	TCGA-B0-4696	III	Advanced
TCGA-B0-4693-01	TCGA-B0-4693	III	Advanced	TCGA-CZ-5469-01	TCGA-CZ-5469	II	Early	TCGA-B0-4706-01	TCGA-B0-4706	III	Advanced
TCGA-B0-4694-01	TCGA-B0-4694	III	Advanced	TCGA-CZ-5470-01	TCGA-CZ-5470	II	Early	TCGA-B0-4707-01	TCGA-B0-4707	III	Advanced
TCGA-B0-4696-01	TCGA-B0-4696	III	Advanced	TCGA-CZ-5985-01	TCGA-CZ-5985	II	Early	TCGA-B0-4710-01	TCGA-B0-4710	III	Advanced
TCGA-B0-4706-01	TCGA-B0-4706	III	Advanced	TCGA-CZ-5989-01	TCGA-CZ-5989	II	Early	TCGA-B0-4713-01	TCGA-B0-4713	III	Advanced
TCGA-B0-4707-01	TCGA-B0-4707	III	Advanced	TCGA-MM-A564-01	TCGA-MM-A564	II	Early	TCGA-B0-4718-01	TCGA-B0-4718	III	Advanced
TCGA-B0-4710-01	TCGA-B0-4710	III	Advanced	TCGA-A3-3307-01	TCGA-A3-3307	III	Advanced	TCGA-B0-4810-01	TCGA-B0-4810	III	Advanced
TCGA-B0-4713-01	TCGA-B0-4713	III	Advanced	TCGA-A3-3308-01	TCGA-A3-3308	III	Advanced	TCGA-B0-4811-01	TCGA-B0-4	III	Advanced
TCGA-B0-4718-01	TCGA-B0-4718	III	Advanced	TCGA-A3-3347-01	TCGA-A3-3347	III	Advanced	TCGA-B0-4813-01	TCGA-B0-4813	III	Advanced
TCGA-B0-4810-01	TCGA-B0-4810	III	Advanced	TCGA-A3-3352-01	TCGA-A3-3352	III	Advanced	TCGA-B0-4815-01	TCGA-B0-4815	III	Advanced
TCGA-B0-4811-01	TCGA-B0-4811	III	Advanced	TCGA-A3-3372-01	TCGA-A3-3372	III	Advanced	TCGA-B0-4817-01	TCGA-B0-4817	III	Advanced
TCGA-B0-4813-01	TCGA-B0-4813	III	Advanced	TCGA-A3-A8OW-01	TCGA-A3-A8OW	III	Advanced	TCGA-B0-4821-01	TCGA-B0-4821	III	Advanced
TCGA-B0-4815-01	TCGA-B0-4815	III	Advanced	TCGA-AK-3426-01	TCGA-AK-3426	III	Advanced	TCGA-B0-4827-01	TCGA-B0-4827	III	Advanced
TCGA-B0-4817-01	TCGA-B0-4817	III	Advanced	TCGA-AK-3428-01	TCGA-AK-3428	III	Advanced	TCGA-B0-4842-01	TCGA-B0-4842	III	Advanced
TCGA-B0-4821-01	TCGA-B0-4821	III	Advanced	TCGA-AK-3445-01	TCGA-AK-3445	III	Advanced	TCGA-B0-4843-01	TCGA-B0-4843	III	Advanced
TCGA-B0-4827-01	TCGA-B0-4827	III	Advanced	TCGA-AK-3455-01	TCGA-AK-3455	III	Advanced	TCGA-B0-4848-01	TCGA-B0-4848	III	Advanced
TCGA-B0-4842-01	TCGA-B0-4842	III	Advanced	TCGA-B0-4693-01	TCGA-B0-4693	III	Advanced	TCGA-B0-4849-01	TCGA-B0-4849	III	Advanced
TCGA-B0-4843-01	TCGA-B0-4843	III	Advanced	TCGA-B0-4694-01	TCGA-B0-4694	III	Advanced	TCGA-B0-5075-01	TCGA-B0-5075	III	Advanced
TCGA-B0-4848-01	TCGA-B0-4848	III	Advanced	TCGA-B0-4696-01	TCGA-B0-4696	III	Advanced	TCGA-B0-5081-01	TCGA-B0-5081	III	Advanced
TCGA-B0-4849-01	TCGA-B0-4849	III	Advanced	TCGA-B0-4706-01	TCGA-B0-4706	III	Advanced	TCGA-B0-5085-01	TCGA-B0-5085	III	Advanced
TCGA-B0-5075-01	TCGA-B0-5075	III	Advanced	TCGA-B0-4707-01	TCGA-B0-4707	III	Advanced	TCGA-B0-5095-01	TCGA-B0-5095	III	Advanced
TCGA-B0-5081-01	TCGA-B0-5081	III	Advanced	TCGA-B0-4710-01	TCGA-B0-4710	III	Advanced	TCGA-B0-5096-01	TCGA-B0-5096	III	Advanced
TCGA-B0-5085-01	TCGA-B0-5085	III	Advanced	TCGA-B0-4713-01	TCGA-B0-4713	III	Advanced	TCGA-B0-5097-01	TCGA-B0-5097	III	Advanced
TCGA-B0-5095-01	TCGA-B0-5095	III	Advanced	TCGA-B0-4718-01	TCGA-B0-4718	III	Advanced	TCGA-B0-5099-01	TCGA-B0-5099	III	Advanced
TCGA-B0-5096-01	TCGA-B0-5096	III	Advanced	TCGA-B0-4810-01	TCGA-B0-4810	III	Advanced	TCGA-B0-5100-01	TCGA-B0-5100	III	Advanced
TCGA-B0-5097-01	TCGA-B0-5097	III	Advanced	TCGA-B0-4811-01	TCGA-B0-4811	III	Advanced	TCGA-B0-5108-01	TCGA-B0-5108	III	Advanced
TCGA-B0-5099-01	TCGA-B0-5099	III	Advanced	TCGA-B0-4813-01	TCGA-B0-4813	III	Advanced	TCGA-B0-5109-01	TCGA-B0-5109	III	Advanced
TCGA-B0-5100-01	TCGA-B0-5100	III	Advanced	TCGA-B0-4815-01	TCGA-B0-4815	III	Advanced	TCGA-B0-5113-01	TCGA-B0-5113	III	Advanced
TCGA-B0-5108-01	TCGA-B0-5108	III	Advanced	TCGA-B0-4817-01	TCGA-B0-4817	III	Advanced	TCGA-B0-5116-01	TCGA-B0-5116	III	Advanced
TCGA-B0-5109-01	TCGA-B0-5109	III	Advanced	TCGA-B0-4821-01	TCGA-B0-4821	III	Advanced	TCGA-B0-5400-01	TCGA-B0-5400	III	Advanced
TCGA-B0-5113-01	TCGA-B0-5113	III	Advanced	TCGA-B0-4827-01	TCGA-B0-4827	III	Advanced	TCGA-B0-5692-01	TCGA-B0-5692	III	Advanced
TCGA-B0-5116-01	TCGA-B0-5116	III	Advanced	TCGA-B0-4842-01	TCGA-B0-4842	III	Advanced	TCGA-B0-5694-01	TCGA-B0-5694	III	Advanced
TCGA-B0-5400-01	TCGA-B0-5400	III	Advanced	TCGA-B0-4843-01	TCGA-B0-4843	III	Advanced	TCGA-B0-5696-01	TCGA-B0-5696	III	Advanced
TCGA-B0-5692-01	TCGA-B0-5692	III	Advanced	TCGA-B0-4848-01	TCGA-B0-4848	III	Advanced	TCGA-B0-5701-01	TCGA-B0-5701	III	Advanced
TCGA-B0-5694-01	TCGA-B0-5694	III	Advanced	TCGA-B0-4849-01	TCGA-B0-4849	III	Advanced	TCGA-B0-5709-01	TCGA-B0-5709	III	Advanced
TCGA-B0-5696-01	TCGA-B0-5696	III	Advanced	TCGA-B0-5075-01	TCGA-B0-5075	III	Advanced	TCGA-B0-5711-01	TCGA-B0-5	III	Advanced
TCGA-B0-5701-01	TCGA-B0-5701	III	Advanced	TCGA-B0-5081-01	TCGA-B0-5081	III	Advanced	TCGA-B0-5713-01	TCGA-B0-5713	III	Advanced
TCGA-B0-5709-01	TCGA-B0-5709	III	Advanced	TCGA-B0-5085-01	TCGA-B0-5085	III	Advanced	TCGA-B4-5832-01	TCGA-B4-5832	III	Advanced
TCGA-B0-5711-01	TCGA-B0-5711	III	Advanced	TCGA-B0-5095-01	TCGA-B0-5095	III	Advanced	TCGA-B8-4151-01	TCGA-B8-4151	III	Advanced
TCGA-B0-5713-01	TCGA-B0-5713	III	Advanced	TCGA-B0-5096-01	TCGA-B0-5096	III	Advanced	TCGA-B8-4153-01	TCGA-B8-4153	III	Advanced
TCGA-B4-5832-01	TCGA-B4-5832	III	Advanced	TCGA-B0-5097-01	TCGA-B0-5097	III	Advanced	TCGA-B8-4620-01	TCGA-B8-4620	III	Advanced
TCGA-B8-4151-01	TCGA-B8-4151	III	Advanced	TCGA-B0-5099-01	TCGA-B0-5099	III	Advanced	TCGA-B8-5158-01	TCGA-B8-5158	III	Advanced
TCGA-B8-4153-01	TCGA-B8-4153	III	Advanced	TCGA-B0-5100-01	TCGA-B0-5100	III	Advanced	TCGA-B8-5163-01	TCGA-B8-5163	III	Advanced
TCGA-B8-4620-01	TCGA-B8-4620	III	Advanced	TCGA-B0-5108-01	TCGA-B0-5108	III	Advanced	TCGA-B8-5164-01	TCGA-B8-5164	III	Advanced
TCGA-B8-5158-01	TCGA-B8-5158	III	Advanced	TCGA-B0-5109-01	TCGA-B0-5109	III	Advanced	TCGA-B8-5550-01	TCGA-B8-5550	III	Advanced
TCGA-B8-5163-01	TCGA-B8-5163	III	Advanced	TCGA-B0-5113-01	TCGA-B0-5113	III	Advanced	TCGA-B8-A54D-01	TCGA-B8-A54D	III	Advanced
TCGA-B8-5164-01	TCGA-B8-5164	III	Advanced	TCGA-B0-5116-01	TCGA-B0-5116	III	Advanced	TCGA-BP-4160-01	TCGA-BP-4160	III	Advanced
TCGA-B8-5550-01	TCGA-B8-5550	III	Advanced	TCGA-B0-5400-01	TCGA-B0-5400	III	Advanced	TCGA-BP-4163-01	TCGA-BP-4163	III	Advanced
TCGA-B8-A54D-01	TCGA-B8-A54D	III	Advanced	TCGA-B0-5692-01	TCGA-B0-5692	III	Advanced	TCGA-BP-4164-01	TCGA-BP-4164	III	Advanced
TCGA-BP-4160-01	TCGA-BP-4160	III	Advanced	TCGA-B0-5694-01	TCGA-B0-5694	III	Advanced	TCGA-BP-4166-01	TCGA-BP-4166	III	Advanced
TCGA-BP-4163-01	TCGA-BP-4163	III	Advanced	TCGA-B0-5696-01	TCGA-B0-5696	III	Advanced	TCGA-BP-4167-01	TCGA-BP-4167	III	Advanced
TCGA-BP-4164-01	TCGA-BP-4164	III	Advanced	TCGA-B0-5701-01	TCGA-B0-5701	III	Advanced	TCGA-BP-4329-01	TCGA-BP-4329	III	Advanced
TCGA-BP-4166-01	TCGA-BP-4166	III	Advanced	TCGA-B0-5709-01	TCGA-B0-5709	III	Advanced	TCGA-BP-4330-01	TCGA-BP-4330	III	Advanced
TCGA-BP-4167-01	TCGA-BP-4167	III	Advanced	TCGA-B0-5711-01	TCGA-B0-5711	III	Advanced	TCGA-BP-4332-01	TCGA-BP-4332	III	Advanced
TCGA-BP-4329-01	TCGA-BP-4329	III	Advanced	TCGA-B0-5713-01	TCGA-B0-5713	III	Advanced	TCGA-BP-4334-01	TCGA-BP-4334	III	Advanced
TCGA-BP-4330-01	TCGA-BP-4330	III	Advanced	TCGA-B4-5832-01	TCGA-B4-5832	III	Advanced	TCGA-BP-4337-01	TCGA-BP-4337	III	Advanced
TCGA-BP-4332-01	TCGA-BP-4332	III	Advanced	TCGA-B8-4151-01	TCGA-B8-4151	III	Advanced	TCGA-BP-4341-01	TCGA-BP-4341	III	Advanced
TCGA-BP-4334-01	TCGA-BP-4334	III	Advanced	TCGA-B8-4153-01	TCGA-B8-4153	III	Advanced	TCGA-BP-4343-01	TCGA-BP-4343	III	Advanced
TCGA-BP-4337-01	TCGA-BP-4337	III	Advanced	TCGA-B8-4620-01	TCGA-B8-4620	III	Advanced	TCGA-BP-4345-01	TCGA-BP-4345	III	Advanced
TCGA-BP-4341-01	TCGA-BP-4341	III	Advanced	TCGA-B8-5158-01	TCGA-B8-5158	III	Advanced	TCGA-BP-4346-01	TCGA-BP-4346	III	Advanced
TCGA-BP-4343-01	TCGA-BP-4343	III	Advanced	TCGA-B8-5163-01	TCGA-B8-5163	III	Advanced	TCGA-BP-4347-01	TCGA-BP-4347	III	Advanced
TCGA-BP-4345-01	TCGA-BP-4345	III	Advanced	TCGA-B8-5164-01	TCGA-B8-5164	III	Advanced	TCGA-BP-4351-01	TCGA-BP-4351	III	Advanced
TCGA-BP-4346-01	TCGA-BP-4346	III	Advanced	TCGA-B8-5550-01	TCGA-B8-5550	III	Advanced	TCGA-BP-4355-01	TCGA-BP-4355	III	Advanced
TCGA-BP-4347-01	TCGA-BP-4347	III	Advanced	TCGA-B8-A54D-01	TCGA-B8-A54D	III	Advanced	TCGA-BP-4761-01	TCGA-BP-4761	III	Advanced
TCGA-BP-4351-01	TCGA-BP-4351	III	Advanced	TCGA-BP-4160-01	TCGA-BP-4160	III	Advanced	TCGA-BP-4797-01	TCGA-BP-4797	III	Advanced
TCGA-BP-4355-01	TCGA-BP-4355	III	Advanced	TCGA-BP-4163-01	TCGA-BP-4163	III	Advanced	TCGA-BP-4799-01	TCGA-BP-4799	III	Advanced
TCGA-BP-4761-01	TCGA-BP-4761	III	Advanced	TCGA-BP-4164-01	TCGA-BP-4164	III	Advanced	TCGA-BP-4803-01	TCGA-BP-4803	III	Advanced
TCGA-BP-4797-01	TCGA-BP-4797	III	Advanced	TCGA-BP-4166-01	TCGA-BP-4166	III	Advanced	TCGA-BP-4967-01	TCGA-BP-4967	III	Advanced
TCGA-BP-4799-01	TCGA-BP-4799	III	Advanced	TCGA-BP-4167-01	TCGA-BP-4167	III	Advanced	TCGA-BP-4970-01	TCGA-BP-4970	III	Advanced
TCGA-BP-4803-01	TCGA-BP-4803	III	Advanced	TCGA-BP-4329-01	TCGA-BP-4329	III	Advanced	TCGA-BP-4971-01	TCGA-BP-4971	III	Advanced
TCGA-BP-4967-01	TCGA-BP-4967	III	Advanced	TCGA-BP-4330-01	TCGA-BP-4330	III	Advanced	TCGA-BP-4972-01	TCGA-BP-4972	III	Advanced
TCGA-BP-4970-01	TCGA-BP-4970	III	Advanced	TCGA-BP-4332-01	TCGA-BP-4332	III	Advanced	TCGA-BP-4973-01	TCGA-BP-4973	III	Advanced
TCGA-BP-4971-01	TCGA-BP-4971	III	Advanced	TCGA-BP-4334-01	TCGA-BP-4334	III	Advanced	TCGA-BP-4981-01	TCGA-BP-4981	III	Advanced
TCGA-BP-4972-01	TCGA-BP-4972	III	Advanced	TCGA-BP-4337-01	TCGA-BP-4337	III	Advanced	TCGA-BP-4983-01	TCGA-BP-4983	III	Advanced
TCGA-BP-4973-01	TCGA-BP-4973	III	Advanced	TCGA-BP-4341-01	TCGA-BP-4341	III	Advanced	TCGA-BP-4985-01	TCGA-BP-4985	III	Advanced
TCGA-BP-4981-01	TCGA-BP-4981	III	Advanced	TCGA-BP-4343-01	TCGA-BP-4343	III	Advanced	TCGA-BP-4989-01	TCGA-BP-4989	III	Advanced
TCGA-BP-4983-01	TCGA-BP-4983	III	Advanced	TCGA-BP-4345-01	TCGA-BP-4345	III	Advanced	TCGA-BP-5010-01	TCGA-BP-5010	III	Advanced
TCGA-BP-4985-01	TCGA-BP-4985	III	Advanced	TCGA-BP-4346-01	TCGA-BP-4346	III	Advanced	TCGA-BP-5183-01	TCGA-BP-5183	III	Advanced
TCGA-BP-4989-01	TCGA-BP-4989	III	Advanced	TCGA-BP-4347-01	TCGA-BP-4347	III	Advanced	TCGA-BP-5191-01	TCGA-BP-5191	III	Advanced
TCGA-BP-5010-01	TCGA-BP-5010	III	Advanced	TCGA-BP-4351-01	TCGA-BP-4351	III	Advanced	TCGA-BP-5198-01	TCGA-BP-5198	III	Advanced
TCGA-BP-5183-01	TCGA-BP-5183	III	Advanced	TCGA-BP-4355-01	TCGA-BP-4355	III	Advanced	TCGA-BP-5202-01	TCGA-BP-5202	III	Advanced
TCGA-BP-5191-01	TCGA-BP-5191	III	Advanced	TCGA-BP-4761-01	TCGA-BP-4761	III	Advanced	TCGA-CJ-4636-01	TCGA-CJ-4636	III	Advanced
TCGA-BP-5198-01	TCGA-BP-5198	III	Advanced	TCGA-BP-4797-01	TCGA-BP-4797	III	Advanced	TCGA-CJ-4640-01	TCGA-CJ-4640	III	Advanced
TCGA-BP-5202-01	TCGA-BP-5202	III	Advanced	TCGA-BP-4799-01	TCGA-BP-4799	III	Advanced	TCGA-CJ-4869-01	TCGA-CJ-4869	III	Advanced
TCGA-CJ-4636-01	TCGA-CJ-4636	III	Advanced	TCGA-BP-4803-01	TCGA-BP-4803	III	Advanced	TCGA-CJ-4870-01	TCGA-CJ-4870	III	Advanced
TCGA-CJ-4640-01	TCGA-CJ-4640	III	Advanced	TCGA-BP-4967-01	TCGA-BP-4967	III	Advanced	TCGA-CJ-4873-01	TCGA-CJ-4873	III	Advanced
TCGA-CJ-4869-01	TCGA-CJ-4869	III	Advanced	TCGA-BP-4970-01	TCGA-BP-4970	III	Advanced	TCGA-CJ-4878-01	TCGA-CJ-4878	III	Advanced
TCGA-CJ-4870-01	TCGA-CJ-4870	III	Advanced	TCGA-BP-4971-01	TCGA-BP-4971	III	Advanced	TCGA-CJ-4881-01	TCGA-CJ-4881	III	Advanced
TCGA-CJ-4873-01	TCGA-CJ-4873	III	Advanced	TCGA-BP-4972-01	TCGA-BP-4972	III	Advanced	TCGA-CJ-4882-01	TCGA-CJ-4882	III	Advanced
TCGA-CJ-4878-01	TCGA-CJ-4878	III	Advanced	TCGA-BP-4973-01	TCGA-BP-4973	III	Advanced	TCGA-CJ-4884-01	TCGA-CJ-4884	III	Advanced
TCGA-CJ-4881-01	TCGA-CJ-4881	III	Advanced	TCGA-BP-4981-01	TCGA-BP-4981	III	Advanced	TCGA-CJ-4891-01	TCGA-CJ-4891	III	Advanced
TCGA-CJ-4882-01	TCGA-CJ-4882	III	Advanced	TCGA-BP-4983-01	TCGA-BP-4983	III	Advanced	TCGA-CJ-4894-01	TCGA-CJ-4894	III	Advanced
TCGA-CJ-4884-01	TCGA-CJ-4884	III	Advanced	TCGA-BP-4985-01	TCGA-BP-4985	III	Advanced	TCGA-CJ-4897-01	TCGA-CJ-4897	III	Advanced
TCGA-CJ-4891-01	TCGA-CJ-4891	III	Advanced	TCGA-BP-4989-01	TCGA-BP-4989	III	Advanced	TCGA-CJ-4901-01	TCGA-CJ-4901	III	Advanced
TCGA-CJ-4894-01	TCGA-CJ-4894	III	Advanced	TCGA-BP-5010-01	TCGA-BP-5010	III	Advanced	TCGA-CJ-4902-01	TCGA-CJ-4902	III	Advanced
TCGA-CJ-4897-01	TCGA-CJ-4897	III	Advanced	TCGA-BP-5183-01	TCGA-BP-5183	III	Advanced	TCGA-CJ-4907-01	TCGA-CJ-4907	III	Advanced
TCGA-CJ-4901-01	TCGA-CJ-4901	III	Advanced	TCGA-BP-5191-01	TCGA-BP-5191	III	Advanced	TCGA-CJ-4916-01	TCGA-CJ-4916	III	Advanced
TCGA-CJ-4902-01	TCGA-CJ-4902	III	Advanced	TCGA-BP-5198-01	TCGA-BP-5198	III	Advanced	TCGA-CJ-5676-01	TCGA-CJ-5676	III	Advanced
TCGA-CJ-4907-01	TCGA-CJ-4907	III	Advanced	TCGA-BP-5202-01	TCGA-BP-5202	III	Advanced	TCGA-CJ-5679-01	TCGA-CJ-5679	III	Advanced
TCGA-CJ-4916-01	TCGA-CJ-4916	III	Advanced	TCGA-CJ-4636-01	TCGA-CJ-4636	III	Advanced	TCGA-CJ-5684-01	TCGA-CJ-5684	III	Advanced
TCGA-CJ-5676-01	TCGA-CJ-5676	III	Advanced	TCGA-CJ-4640-01	TCGA-CJ-4640	III	Advanced	TCGA-CW-5584-01	TCGA-CW-5584	III	Advanced
TCGA-CJ-5679-01	TCGA-CJ-5679	III	Advanced	TCGA-CJ-4869-01	TCGA-CJ-4869	III	Advanced	TCGA-CW-5587-01	TCGA-CW-5587	III	Advanced
TCGA-CJ-5684-01	TCGA-CJ-5684	III	Advanced	TCGA-CJ-4870-01	TCGA-CJ-4870	III	Advanced	TCGA-CW-6097-01	TCGA-CW-6097	III	Advanced
TCGA-CW-5584-01	TCGA-CW-5584	III	Advanced	TCGA-CJ-4873-01	TCGA-CJ-4873	III	Advanced	TCGA-CZ-4863-01	TCGA-CZ-4863	III	Advanced
TCGA-CW-5587-01	TCGA-CW-5587	III	Advanced	TCGA-CJ-4878-01	TCGA-CJ-4878	III	Advanced	TCGA-CZ-5457-01	TCGA-CZ-5457	III	Advanced
TCGA-CW-6097-01	TCGA-CW-6097	III	Advanced	TCGA-CJ-4881-01	TCGA-CJ-4881	III	Advanced	TCGA-CZ-5458-01	TCGA-CZ-5458	III	Advanced
TCGA-CZ-4863-01	TCGA-CZ-4863	III	Advanced	TCGA-CJ-4882-01	TCGA-CJ-4882	III	Advanced	TCGA-CZ-5459-01	TCGA-CZ-5459	III	Advanced
TCGA-CZ-5457-01	TCGA-CZ-5457	III	Advanced	TCGA-CJ-4884-01	TCGA-CJ-4884	III	Advanced	TCGA-CZ-5465-01	TCGA-CZ-5465	III	Advanced
TCGA-CZ-5458-01	TCGA-CZ-5458	III	Advanced	TCGA-CJ-4891-01	TCGA-CJ-4891	III	Advanced	TCGA-CZ-5466-01	TCGA-CZ-5466	III	Advanced
TCGA-CZ-5459-01	TCGA-CZ-5459	III	Advanced	TCGA-CJ-4894-01	TCGA-CJ-4894	III	Advanced	TCGA-CZ-5467-01	TCGA-CZ-5467	III	Advanced
TCGA-CZ-5465-01	TCGA-CZ-5465	III	Advanced	TCGA-CJ-4897-01	TCGA-CJ-4897	III	Advanced	TCGA-EU-5907-01	TCGA-EU-5907	III	Advanced
TCGA-CZ-5466-01	TCGA-CZ-5466	III	Advanced	TCGA-CJ-4901-01	TCGA-CJ-4901	III	Advanced	TCGA-AK-3436-01	TCGA-AK-3436	IV	Advanced
TCGA-CZ-5467-01	TCGA-CZ-5467	III	Advanced	TCGA-CJ-4902-01	TCGA-CJ-4902	III	Advanced	TCGA-B0-4688-01	TCGA-B0-4688	IV	Advanced
TCGA-EU-5907-01	TCGA-EU-5907	III	Advanced	TCGA-CJ-4907-01	TCGA-CJ-4907	III	Advanced	TCGA-B0-4690-01	TCGA-B0-4690	IV	Advanced
TCGA-AK-3436-01	TCGA-AK-3436	IV	Advanced	TCGA-CJ-4916-01	TCGA-CJ-4916	III	Advanced	TCGA-B0-4691-01	TCGA-B0-4691	IV	Advanced
TCGA-B0-4688-01	TCGA-B0-4688	IV	Advanced	TCGA-CJ-5676-01	TCGA-CJ-5676	III	Advanced	TCGA-B0-4697-01	TCGA-B0-4697	IV	Advanced
TCGA-B0-4690-01	TCGA-B0-4690	IV	Advanced	TCGA-CJ-5679-01	TCGA-CJ-5679	III	Advanced	TCGA-B0-4698-01	TCGA-B0-4698	IV	Advanced
TCGA-B0-4691-01	TCGA-B0-4691	IV	Advanced	TCGA-CJ-5684-01	TCGA-CJ-5684	III	Advanced	TCGA-B0-4699-01	TCGA-B0-4699	IV	Advanced
TCGA-B0-4697-01	TCGA-B0-4697	IV	Advanced	TCGA-CW-5584-01	TCGA-CW-5584	III	Advanced	TCGA-B0-4700-01	TCGA-B0-4700	IV	Advanced
TCGA-B0-4698-01	TCGA-B0-4698	IV	Advanced	TCGA-CW-5587-01	TCGA-CW-5587	III	Advanced	TCGA-B0-4701-01	TCGA-B0-4701	IV	Advanced
TCGA-B0-4699-01	TCGA-B0-4699	IV	Advanced	TCGA-CW-6097-01	TCGA-CW-6097	III	Advanced	TCGA-B0-4703-01	TCGA-B0-4703	IV	Advanced
TCGA-B0-4700-01	TCGA-B0-4700	IV	Advanced	TCGA-CZ-4863-01	TCGA-CZ-4863	III	Advanced	TCGA-B0-4712-01	TCGA-B0-4712	IV	Advanced
TCGA-B0-4701-01	TCGA-B0-4701	IV	Advanced	TCGA-CZ-5457-01	TCGA-CZ-5457	III	Advanced	TCGA-B0-4714-01	TCGA-B0-4714	IV	Advanced
TCGA-B0-4703-01	TCGA-B0-4703	IV	Advanced	TCGA-CZ-5458-01	TCGA-CZ-5458	III	Advanced	TCGA-B0-4814-01	TCGA-B0-4814	IV	Advanced
TCGA-B0-4712-01	TCGA-B0-4712	IV	Advanced	TCGA-CZ-5459-01	TCGA-CZ-5459	III	Advanced	TCGA-B0-4819-01	TCGA-B0-4819	IV	Advanced
TCGA-B0-4714-01	TCGA-B0-4714	IV	Advanced	TCGA-CZ-5465-01	TCGA-CZ-5465	III	Advanced	TCGA-B0-4828-01	TCGA-B0-4828	IV	Advanced
TCGA-B0-4814-01	TCGA-B0-4814	IV	Advanced	TCGA-CZ-5466-01	TCGA-CZ-5466	III	Advanced	TCGA-B0-4836-01	TCGA-B0-4836	IV	Advanced
TCGA-B0-4819-01	TCGA-B0-4819	IV	Advanced	TCGA-CZ-5467-01	TCGA-CZ-5467	III	Advanced	TCGA-B0-4841-01	TCGA-B0-4841	IV	Advanced
TCGA-B0-4828-01	TCGA-B0-4828	IV	Advanced	TCGA-EU-5907-01	TCGA-EU-5907	III	Advanced	TCGA-B0-4844-01	TCGA-B0-4844	IV	Advanced
TCGA-B0-4836-01	TCGA-B0-4836	IV	Advanced	TCGA-AK-3436-01	TCGA-AK-3436	IV	Advanced	TCGA-B0-4845-01	TCGA-B0-4845	IV	Advanced
TCGA-B0-4841-01	TCGA-B0-4841	IV	Advanced	TCGA-B0-4688-01	TCGA-B0-4688	IV	Advanced	TCGA-B0-4846-01	TCGA-B0-4846	IV	Advanced
TCGA-B0-4844-01	TCGA-B0-4844	IV	Advanced	TCGA-B0-4690-01	TCGA-B0-4690	IV	Advanced	TCGA-B0-4847-01	TCGA-B0-4847	IV	Advanced
TCGA-B0-4845-01	TCGA-B0-4845	IV	Advanced	TCGA-B0-4691-01	TCGA-B0-4691	IV	Advanced	TCGA-B0-5080-01	TCGA-B0-5080	IV	Advanced
TCGA-B0-4846-01	TCGA-B0-4846	IV	Advanced	TCGA-B0-4697-01	TCGA-B0-4697	IV	Advanced	TCGA-B0-5084-01	TCGA-B0-5084	IV	Advanced
TCGA-B0-4847-01	TCGA-B0-4847	IV	Advanced	TCGA-B0-4698-01	TCGA-B0-4698	IV	Advanced	TCGA-B0-5092-01	TCGA-B0-5092	IV	Advanced
TCGA-B0-5080-01	TCGA-B0-5080	IV	Advanced	TCGA-B0-4699-01	TCGA-B0-4699	IV	Advanced	TCGA-B0-5094-01	TCGA-B0-5094	IV	Advanced
TCGA-B0-5084-01	TCGA-B0-5084	IV	Advanced	TCGA-B0-4700-01	TCGA-B0-4700	IV	Advanced	TCGA-B0-5107-01	TCGA-B0-5107	IV	Advanced
TCGA-B0-5092-01	TCGA-B0-5092	IV	Advanced	TCGA-B0-4701-01	TCGA-B0-4701	IV	Advanced	TCGA-B0-5115-01	TCGA-B0-5115	IV	Advanced
TCGA-B0-5094-01	TCGA-B0-5094	IV	Advanced	TCGA-B0-4703-01	TCGA-B0-4703	IV	Advanced	TCGA-B0-5402-01	TCGA-B0-5402	IV	Advanced
TCGA-B0-5107-01	TCGA-B0-5107	IV	Advanced	TCGA-B0-4712-01	TCGA-B0-4712	IV	Advanced	TCGA-B0-5712-01	TCGA-B0-5712	IV	Advanced
TCGA-B0-5115-01	TCGA-B0-5115	IV	Advanced	TCGA-B0-4714-01	TCGA-B0-4714	IV	Advanced	TCGA-B2-5639-01	TCGA-B2-5639	IV	Advanced
TCGA-B0-5402-01	TCGA-B0-5402	IV	Advanced	TCGA-B0-4814-01	TCGA-B0-4814	IV	Advanced	TCGA-B4-5377-01	TCGA-B4-5377	IV	Advanced
TCGA-B0-5712-01	TCGA-B0-5712	IV	Advanced	TCGA-B0-4819-01	TCGA-B0-4819	IV	Advanced	TCGA-B8-4143-01	TCGA-B8-4143	IV	Advanced
TCGA-B2-5639-01	TCGA-B2-5639	IV	Advanced	TCGA-B0-4828-01	TCGA-B0-4828	IV	Advanced	TCGA-B8-4622-01	TCGA-B8-4622	IV	Advanced
TCGA-B4-5377-01	TCGA-B4-5377	IV	Advanced	TCGA-B0-4836-01	TCGA-B0-4836	IV	Advanced	TCGA-BP-4335-01	TCGA-BP-4335	IV	Advanced
TCGA-B8-4143-01	TCGA-B8-4143	IV	Advanced	TCGA-B0-4841-01	TCGA-B0-4841	IV	Advanced	TCGA-BP-4352-01	TCGA-BP-4352	IV	Advanced
TCGA-B8-4622-01	TCGA-B8-4622	IV	Advanced	TCGA-B0-4844-01	TCGA-B0-4844	IV	Advanced	TCGA-BP-4354-01	TCGA-BP-4354	IV	Advanced
TCGA-BP-4335-01	TCGA-BP-4335	IV	Advanced	TCGA-B0-4845-01	TCGA-B0-4845	IV	Advanced	TCGA-BP-4770-01	TCGA-BP-4770	IV	Advanced
TCGA-BP-4352-01	TCGA-BP-4352	IV	Advanced	TCGA-B0-4846-01	TCGA-B0-4846	IV	Advanced	TCGA-BP-4771-01	TCGA-BP-4771	IV	Advanced
TCGA-BP-4354-01	TCGA-BP-4354	IV	Advanced	TCGA-B0-4847-01	TCGA-B0-4847	IV	Advanced	TCGA-BP-4787-01	TCGA-BP-4787	IV	Advanced
TCGA-BP-4770-01	TCGA-BP-4770	IV	Advanced	TCGA-B0-5080-01	TCGA-B0-5080	IV	Advanced	TCGA-BP-4974-01	TCGA-BP-4974	IV	Advanced
TCGA-BP-4771-01	TCGA-BP-4771	IV	Advanced	TCGA-B0-5084-01	TCGA-B0-5084	IV	Advanced	TCGA-BP-5178-01	TCGA-BP-5178	IV	Advanced
TCGA-BP-4787-01	TCGA-BP-4787	IV	Advanced	TCGA-B0-5092-01	TCGA-B0-5092	IV	Advanced	TCGA-BP-5201-01	TCGA-BP-5201	IV	Advanced
TCGA-BP-4974-01	TCGA-BP-4974	IV	Advanced	TCGA-B0-5094-01	TCGA-B0-5094	IV	Advanced	TCGA-CJ-4637-01	TCGA-CJ-4637	IV	Advanced
TCGA-BP-5178-01	TCGA-BP-5178	IV	Advanced	TCGA-B0-5107-01	TCGA-B0-5107	IV	Advanced	TCGA-CJ-4638-01	TCGA-CJ-4638	IV	Advanced
TCGA-BP-5201-01	TCGA-BP-5201	IV	Advanced	TCGA-B0-5115-01	TCGA-B0-5115	IV	Advanced	TCGA-CJ-4641-01	TCGA-CJ-4641	IV	Advanced
TCGA-CJ-4637-01	TCGA-CJ-4637	IV	Advanced	TCGA-B0-5402-01	TCGA-B0-5402	IV	Advanced	TCGA-CJ-4644-01	TCGA-CJ-4644	IV	Advanced
TCGA-CJ-4638-01	TCGA-CJ-4638	IV	Advanced	TCGA-B0-5712-01	TCGA-B0-5712	IV	Advanced	TCGA-CJ-4871-01	TCGA-CJ-4871	IV	Advanced
TCGA-CJ-4641-01	TCGA-CJ-4641	IV	Advanced	TCGA-B2-5639-01	TCGA-B2-5639	IV	Advanced	TCGA-CJ-4875-01	TCGA-CJ-4875	IV	Advanced
TCGA-CJ-4644-01	TCGA-CJ-4644	IV	Advanced	TCGA-B4-5377-01	TCGA-B4-5377	IV	Advanced	TCGA-CJ-4885-01	TCGA-CJ-4885	IV	Advanced
TCGA-CJ-4871-01	TCGA-CJ-4871	IV	Advanced	TCGA-B8-4143-01	TCGA-B8-4143	IV	Advanced	TCGA-CJ-4887-01	TCGA-CJ-4887	IV	Advanced
TCGA-CJ-4875-01	TCGA-CJ-4875	IV	Advanced	TCGA-B8-4622-01	TCGA-B8-4622	IV	Advanced	TCGA-CJ-4888-01	TCGA-CJ-4888	IV	Advanced
TCGA-CJ-4885-01	TCGA-CJ-4885	IV	Advanced	TCGA-BP-4335-01	TCGA-BP-4335	IV	Advanced	TCGA-CJ-4890-01	TCGA-CJ-4890	IV	Advanced
TCGA-CJ-4887-01	TCGA-CJ-4887	IV	Advanced	TCGA-BP-4352-01	TCGA-BP-4352	IV	Advanced	TCGA-CJ-4895-01	TCGA-CJ-4895	IV	Advanced
TCGA-CJ-4888-01	TCGA-CJ-4888	IV	Advanced	TCGA-BP-4354-01	TCGA-BP-4354	IV	Advanced	TCGA-CJ-4900-01	TCGA-CJ-4900	IV	Advanced
TCGA-CJ-4890-01	TCGA-CJ-4890	IV	Advanced	TCGA-BP-4770-01	TCGA-BP-4770	IV	Advanced	TCGA-CJ-4904-01	TCGA-CJ-4904	IV	Advanced
TCGA-CJ-4895-01	TCGA-CJ-4895	IV	Advanced	TCGA-BP-4771-01	TCGA-BP-4771	IV	Advanced	TCGA-CJ-4918-01	TCGA-CJ-4918	IV	Advanced
TCGA-CJ-4900-01	TCGA-CJ-4900	IV	Advanced	TCGA-BP-4787-01	TCGA-BP-4787	IV	Advanced	TCGA-CJ-5677-01	TCGA-CJ-5677	IV	Advanced
TCGA-CJ-4904-01	TCGA-CJ-4904	IV	Advanced	TCGA-BP-4974-01	TCGA-BP-4974	IV	Advanced	TCGA-CJ-5678-01	TCGA-CJ-5678	IV	Advanced
TCGA-CJ-4918-01	TCGA-CJ-4918	IV	Advanced	TCGA-BP-5178-01	TCGA-BP-5178	IV	Advanced	TCGA-CJ-5680-01	TCGA-CJ-5680	IV	Advanced
TCGA-CJ-4923-01	TCGA-CJ-4923	IV	Advanced	TCGA-BP-5201-01	TCGA-BP-5201	IV	Advanced	TCGA-CJ-5681-01	TCGA-CJ-5681	IV	Advanced
TCGA-CJ-5677-01	TCGA-CJ-5677	IV	Advanced	TCGA-CJ-4637-01	TCGA-CJ-4637	IV	Advanced	TCGA-CJ-5682-01	TCGA-CJ-5682	IV	Advanced
TCGA-CJ-5678-01	TCGA-CJ-5678	IV	Advanced	TCGA-CJ-4638-01	TCGA-CJ-4638	IV	Advanced	TCGA-CJ-6028-01	TCGA-CJ-6028	IV	Advanced
TCGA-CJ-5680-01	TCGA-CJ-5680	IV	Advanced	TCGA-CJ-4641-01	TCGA-CJ-4641	IV	Advanced	TCGA-CJ-6033-01	TCGA-CJ-6033	IV	Advanced
TCGA-CJ-5681-01	TCGA-CJ-5681	IV	Advanced	TCGA-CJ-4644-01	TCGA-CJ-4644	IV	Advanced	TCGA-CW-5580-01	TCGA-CW-5580	IV	Advanced
TCGA-CJ-5682-01	TCGA-CJ-5682	IV	Advanced	TCGA-CJ-4868-01	TCGA-CJ-4868	IV	Advanced	TCGA-CW-5585-01	TCGA-CW-5585	IV	Advanced
TCGA-CJ-6028-01	TCGA-CJ-6028	IV	Advanced	TCGA-CJ-4871-01	TCGA-CJ-4871	IV	Advanced	TCGA-CW-5590-01	TCGA-CW-5590	IV	Advanced
TCGA-CJ-6033-01	TCGA-CJ-6033	IV	Advanced	TCGA-CJ-4875-01	TCGA-CJ-4875	IV	Advanced	TCGA-CW-5591-01	TCGA-CW-5591	IV	Advanced
TCGA-CW-5580-01	TCGA-CW-5580	IV	Advanced	TCGA-CJ-4885-01	TCGA-CJ-4885	IV	Advanced	TCGA-CW-6087-01	TCGA-CW-6087	IV	Advanced
TCGA-CW-5585-01	TCGA-CW-5585	IV	Advanced	TCGA-CJ-4887-01	TCGA-CJ-4887	IV	Advanced	TCGA-CZ-4857-01	TCGA-CZ-4857	IV	Advanced
TCGA-CW-5590-01	TCGA-CW-5590	IV	Advanced	TCGA-CJ-4888-01	TCGA-CJ-4888	IV	Advanced	TCGA-CZ-4860-01	TCGA-CZ-4860	IV	Advanced
TCGA-CW-5591-01	TCGA-CW-5591	IV	Advanced	TCGA-CJ-4890-01	TCGA-CJ-4890	IV	Advanced	TCGA-CZ-5454-01	TCGA-CZ-5454	IV	Advanced
TCGA-CW-6087-01	TCGA-CW-6087	IV	Advanced	TCGA-CJ-4895-01	TCGA-CJ-4895	IV	Advanced	TCGA-CZ-5455-01	TCGA-CZ-5455	IV	Advanced
TCGA-CZ-4857-01	TCGA-CZ-4857	IV	Advanced	TCGA-CJ-4900-01	TCGA-CJ-4900	IV	Advanced	TCGA-CZ-5460-01	TCGA-CZ-5460	IV	Advanced
TCGA-CZ-4860-01	TCGA-CZ-4860	IV	Advanced	TCGA-CJ-4904-01	TCGA-CJ-4904	IV	Advanced	TCGA-CZ-5461-01	TCGA-CZ-5461	IV	Advanced
TCGA-CZ-5454-01	TCGA-CZ-5454	IV	Advanced	TCGA-CJ-4918-01	TCGA-CJ-4918	IV	Advanced	TCGA-CZ-5462-01	TCGA-CZ-5462	IV	Advanced
TCGA-CZ-5455-01	TCGA-CZ-5455	IV	Advanced	TCGA-CJ-5677-01	TCGA-CJ-5677	IV	Advanced	TCGA-CZ-5464-01	TCGA-CZ-5464	IV	Advanced
TCGA-CZ-5460-01	TCGA-CZ-5460	IV	Advanced	TCGA-CJ-5678-01	TCGA-CJ-5678	IV	Advanced	TCGA-CZ-5468-01	TCGA-CZ-5468	IV	Advanced
TCGA-CZ-5461-01	TCGA-CZ-5461	IV	Advanced	TCGA-CJ-5680-01	TCGA-CJ-5680	IV	Advanced	TCGA-CZ-5987-01	TCGA-CZ-5987	IV	Advanced
TCGA-CZ-5462-01	TCGA-CZ-5462	IV	Advanced	TCGA-CJ-5681-01	TCGA-CJ-5681	IV	Advanced	TCGA-DV-A4VX-01	TCGA-DV-A4VX	IV	Advanced
TCGA-CZ-5464-01	TCGA-CZ-5464	IV	Advanced	TCGA-CJ-5682-01	TCGA-CJ-5682	IV	Advanced	TCGA-G6-A5PC-01	TCGA-G6-A5PC	IV	Advanced
TCGA-CZ-5468-01	TCGA-CZ-5468	IV	Advanced	TCGA-CJ-6028-01	TCGA-CJ-6028	IV	Advanced	TCGA-G6-A8L6-01	TCGA-G6-A8L6	IV	Advanced
TCGA-CZ-5987-01	TCGA-CZ-5987	IV	Advanced	TCGA-CJ-6033-01	TCGA-CJ-6033	IV	Advanced	TCGA-B4-5838-01	TCGA-B4-5838	TNS	TNS
TCGA-DV-A4VX-01	TCGA-DV-A4VX	IV	Advanced	TCGA-CW-5580-01	TCGA-CW-5580	IV	Advanced	TCGA-BP-4798-01	TCGA-BP-4798	TNS	TNS
TCGA-G6-A5PC-01	TCGA-G6-A5PC	IV	Advanced	TCGA-CW-5585-01	TCGA-CW-5585	IV	Advanced	TCGA-MM-A563-01	TCGA-MM-A563	TNS	TNS
TCGA-G6-A8L6-01	TCGA-G6-A8L6	IV	Advanced	TCGA-CW-5590-01	TCGA-CW-5590	IV	Advanced
TCGA-B4-5838-01	TCGA-B4-5838	TNS	TNS	TCGA-CW-5591-01	TCGA-CW-5591	IV	Advanced
TCGA-BP-4798-01	TCGA-BP-4798	TNS	TNS	TCGA-CW-6087-01	TCGA-CW-6087	IV	Advanced
TCGA-MM-A563-01	TCGA-MM-A563	TNS	TNS	TCGA-CZ-4857-01	TCGA-CZ-4857	IV	Advanced
				TCGA-CZ-4860-01	TCGA-CZ-4860	IV	Advanced
				TCGA-CZ-5454-01	TCGA-CZ-5454	IV	Advanced
				TCGA-CZ-5455-01	TCGA-CZ-5455	IV	Advanced
				TCGA-CZ-5460-01	TCGA-CZ-5460	IV	Advanced
				TCGA-CZ-5461-01	TCGA-CZ-5461	IV	Advanced
				TCGA-CZ-5462-01	TCGA-CZ-5462	IV	Advanced
				TCGA-CZ-5464-01	TCGA-CZ-5464	IV	Advanced
				TCGA-CZ-5468-01	TCGA-CZ-5468	IV	Advanced
				TCGA-CZ-5987-01	TCGA-CZ-5987	IV	Advanced
				TCGA-DV-A4VX-01	TCGA-DV-A4VX	IV	Advanced
				TCGA-G6-A5PC-01	TCGA-G6-A5PC	IV	Advanced
				TCGA-G6-A8L6-01	TCGA-G6-A8L6	IV	Advanced
				TCGA-B4-5838-01	TCGA-B4-5838	TNS	TNS
				TCGA-BP-4798-01	TCGA-BP-4798	TNS	TNS
				TCGA-MM-A563-01	TCGA-MM-A563	TNS	TNS

## Sheet: KIRP
Step 1 (Differential analysis )								Step 2 (Correlation analysis)				Step 3 (Confirm correlation result)
miRNA sequencing				RNA sequencing				RNA sequencing and miRNA sequencing				Paired samples
Samples	Patients	Stages	Groups	Samples	Patients	Stages	Groups	Samples	Patients	Stages	Groups	Samples	Patients	Stages	Groups
TCGA-A4-A5Y1-11	TCGA-A4-A5Y1	HC	HC	TCGA-BQ-5875-11	TCGA-BQ-5875	HC	HC	TCGA-BQ-5875-11	TCGA-BQ-5875	HC	HC	TCGA-A4-A57E-01	TCGA-A4-A57E	IV	Advanced
TCGA-B9-4115-11	TCGA-B9-4115	HC	HC	TCGA-BQ-5877-11	TCGA-BQ-5877	HC	HC	TCGA-BQ-5877-11	TCGA-BQ-5877	HC	HC	TCGA-B9-4115-11	TCGA-B9-4115	HC	HC
TCGA-BQ-5875-11	TCGA-BQ-5875	HC	HC	TCGA-BQ-5878-11	TCGA-BQ-5878	HC	HC	TCGA-BQ-5878-11	TCGA-BQ-5878	HC	HC	TCGA-B9-4115-01	TCGA-B9-4115	I	Early
TCGA-BQ-5877-11	TCGA-BQ-5877	HC	HC	TCGA-BQ-5879-11	TCGA-BQ-5879	HC	HC	TCGA-BQ-5879-11	TCGA-BQ-5879	HC	HC	TCGA-BQ-5875-11	TCGA-BQ-5875	HC	HC
TCGA-BQ-5878-11	TCGA-BQ-5878	HC	HC	TCGA-BQ-5882-11	TCGA-BQ-5882	HC	HC	TCGA-BQ-5882-11	TCGA-BQ-5882	HC	HC	TCGA-BQ-5875-01	TCGA-BQ-5875	III	Advanced
TCGA-BQ-5879-11	TCGA-BQ-5879	HC	HC	TCGA-BQ-5884-11	TCGA-BQ-5884	HC	HC	TCGA-BQ-5884-11	TCGA-BQ-5884	HC	HC	TCGA-BQ-5877-11	TCGA-BQ-5877	HC	HC
TCGA-BQ-5882-11	TCGA-BQ-5882	HC	HC	TCGA-BQ-5887-11	TCGA-BQ-5887	HC	HC	TCGA-BQ-5887-11	TCGA-BQ-5887	HC	HC	TCGA-BQ-5877-01	TCGA-BQ-5877	IV	Advanced
TCGA-BQ-5884-11	TCGA-BQ-5884	HC	HC	TCGA-BQ-5888-11	TCGA-BQ-5888	HC	HC	TCGA-BQ-5888-11	TCGA-BQ-5888	HC	HC	TCGA-BQ-5878-11	TCGA-BQ-5878	HC	HC
TCGA-BQ-5887-11	TCGA-BQ-5887	HC	HC	TCGA-BQ-5890-11	TCGA-BQ-5890	HC	HC	TCGA-BQ-5890-11	TCGA-BQ-5890	HC	HC	TCGA-BQ-5878-01	TCGA-BQ-5878	III	Advanced
TCGA-BQ-5888-11	TCGA-BQ-5888	HC	HC	TCGA-BQ-5891-11	TCGA-BQ-5891	HC	HC	TCGA-BQ-5891-11	TCGA-BQ-5891	HC	HC	TCGA-BQ-5879-11	TCGA-BQ-5879	HC	HC
TCGA-BQ-5890-11	TCGA-BQ-5890	HC	HC	TCGA-BQ-5894-11	TCGA-BQ-5894	HC	HC	TCGA-BQ-5894-11	TCGA-BQ-5894	HC	HC	TCGA-BQ-5879-01	TCGA-BQ-5879	III	Advanced
TCGA-BQ-5891-11	TCGA-BQ-5891	HC	HC	TCGA-BQ-7044-11	TCGA-BQ-7044	HC	HC	TCGA-BQ-7044-11	TCGA-BQ-7044	HC	HC	TCGA-BQ-5882-11	TCGA-BQ-5882	HC	HC
TCGA-BQ-5894-11	TCGA-BQ-5894	HC	HC	TCGA-BQ-7045-11	TCGA-BQ-7045	HC	HC	TCGA-BQ-7045-11	TCGA-BQ-7045	HC	HC	TCGA-BQ-5882-01	TCGA-BQ-5882	III	Advanced
TCGA-BQ-7044-11	TCGA-BQ-7044	HC	HC	TCGA-BQ-7046-11	TCGA-BQ-7046	HC	HC	TCGA-BQ-7046-11	TCGA-BQ-7046	HC	HC	TCGA-BQ-5884-11	TCGA-BQ-5884	HC	HC
TCGA-BQ-7045-11	TCGA-BQ-7045	HC	HC	TCGA-BQ-7051-11	TCGA-BQ-7051	HC	HC	TCGA-BQ-7051-11	TCGA-BQ-7051	HC	HC	TCGA-BQ-5884-01	TCGA-BQ-5884	I	Early
TCGA-BQ-7046-11	TCGA-BQ-7046	HC	HC	TCGA-BQ-7055-11	TCGA-BQ-7055	HC	HC	TCGA-BQ-7055-11	TCGA-BQ-7055	HC	HC	TCGA-BQ-5887-11	TCGA-BQ-5887	HC	HC
TCGA-BQ-7051-11	TCGA-BQ-7051	HC	HC	TCGA-BQ-7059-11	TCGA-BQ-7059	HC	HC	TCGA-BQ-7059-11	TCGA-BQ-7059	HC	HC	TCGA-BQ-5887-01	TCGA-BQ-5887	III	Advanced
TCGA-BQ-7055-11	TCGA-BQ-7055	HC	HC	TCGA-BQ-7061-11	TCGA-BQ-7061	HC	HC	TCGA-BQ-7061-11	TCGA-BQ-7061	HC	HC	TCGA-BQ-5888-11	TCGA-BQ-5888	HC	HC
TCGA-BQ-7059-11	TCGA-BQ-7059	HC	HC	TCGA-DZ-6131-11	TCGA-DZ-6131	HC	HC	TCGA-DZ-6131-11	TCGA-DZ-6131	HC	HC	TCGA-BQ-5888-01	TCGA-BQ-5888	I	Early
TCGA-BQ-7061-11	TCGA-BQ-7061	HC	HC	TCGA-DZ-6132-11	TCGA-DZ-6132	HC	HC	TCGA-DZ-6132-11	TCGA-DZ-6132	HC	HC	TCGA-BQ-5890-11	TCGA-BQ-5890	HC	HC
TCGA-DZ-6131-11	TCGA-DZ-6131	HC	HC	TCGA-DZ-6133-11	TCGA-DZ-6133	HC	HC	TCGA-DZ-6133-11	TCGA-DZ-6133	HC	HC	TCGA-BQ-5890-01	TCGA-BQ-5890	III	Advanced
TCGA-DZ-6132-11	TCGA-DZ-6132	HC	HC	TCGA-DZ-6134-11	TCGA-DZ-6134	HC	HC	TCGA-DZ-6134-11	TCGA-DZ-6134	HC	HC	TCGA-BQ-5891-11	TCGA-BQ-5891	HC	HC
TCGA-DZ-6133-11	TCGA-DZ-6133	HC	HC	TCGA-GL-6846-11	TCGA-GL-6846	HC	HC	TCGA-GL-6846-11	TCGA-GL-6846	HC	HC	TCGA-BQ-5891-01	TCGA-BQ-5891	III	Advanced
TCGA-DZ-6134-11	TCGA-DZ-6134	HC	HC	TCGA-GL-7966-11	TCGA-GL-7966	HC	HC	TCGA-GL-7966-11	TCGA-GL-7966	HC	HC	TCGA-BQ-5894-11	TCGA-BQ-5894	HC	HC
TCGA-GL-6846-11	TCGA-GL-6846	HC	HC	TCGA-GL-A59R-11	TCGA-GL-A59R	HC	HC	TCGA-GL-A59R-11	TCGA-GL-A59R	HC	HC	TCGA-BQ-5894-01	TCGA-BQ-5894	IV	Advanced
TCGA-GL-7966-11	TCGA-GL-7966	HC	HC	TCGA-GL-A9DE-11	TCGA-GL-A9DE	HC	HC	TCGA-GL-A9DE-11	TCGA-GL-A9DE	HC	HC	TCGA-BQ-7044-11	TCGA-BQ-7044	HC	HC
TCGA-GL-A59R-11	TCGA-GL-A59R	HC	HC	TCGA-P4-A5E8-11	TCGA-P4-A5E8	HC	HC	TCGA-P4-A5E8-11	TCGA-P4-A5E8	HC	HC	TCGA-BQ-7044-01	TCGA-BQ-7044	III	Advanced
TCGA-GL-A9DE-11	TCGA-GL-A9DE	HC	HC	TCGA-P4-A5ED-11	TCGA-P4-A5ED	HC	HC	TCGA-P4-A5ED-11	TCGA-P4-A5ED	HC	HC	TCGA-BQ-7045-11	TCGA-BQ-7045	HC	HC
TCGA-P4-A5E8-11	TCGA-P4-A5E8	HC	HC	TCGA-Y8-A8RY-11	TCGA-Y8-A8RY	HC	HC	TCGA-Y8-A8RY-11	TCGA-Y8-A8RY	HC	HC	TCGA-BQ-7045-01	TCGA-BQ-7045	I	Early
TCGA-P4-A5ED-11	TCGA-P4-A5ED	HC	HC	TCGA-2Z-A9J1-01	TCGA-2Z-A9J1	I	Early	TCGA-2Z-A9J1-01	TCGA-2Z-A9J1	I	Early	TCGA-BQ-7046-11	TCGA-BQ-7046	HC	HC
TCGA-Y8-A8RY-11	TCGA-Y8-A8RY	HC	HC	TCGA-2Z-A9J2-01	TCGA-2Z-A9J2	I	Early	TCGA-2Z-A9J2-01	TCGA-2Z-A9J2	I	Early	TCGA-BQ-7046-01	TCGA-BQ-7046	I	Early
TCGA-2Z-A9J1-01	TCGA-2Z-A9J1	I	Early	TCGA-2Z-A9J6-01	TCGA-2Z-A9J6	I	Early	TCGA-2Z-A9J6-01	TCGA-2Z-A9J6	I	Early	TCGA-BQ-7051-11	TCGA-BQ-7051	HC	HC
TCGA-2Z-A9J2-01	TCGA-2Z-A9J2	I	Early	TCGA-2Z-A9J8-01	TCGA-2Z-A9J8	I	Early	TCGA-2Z-A9J8-01	TCGA-2Z-A9J8	I	Early	TCGA-BQ-7051-01	TCGA-BQ-7051	II	Early
TCGA-2Z-A9J6-01	TCGA-2Z-A9J6	I	Early	TCGA-2Z-A9J9-01	TCGA-2Z-A9J9	I	Early	TCGA-2Z-A9J9-01	TCGA-2Z-A9J9	I	Early	TCGA-BQ-7055-11	TCGA-BQ-7055	HC	HC
TCGA-2Z-A9J8-01	TCGA-2Z-A9J8	I	Early	TCGA-2Z-A9JD-01	TCGA-2Z-A9JD	I	Early	TCGA-2Z-A9JD-01	TCGA-2Z-A9JD	I	Early	TCGA-BQ-7055-01	TCGA-BQ-7055	I	Early
TCGA-2Z-A9J9-01	TCGA-2Z-A9J9	I	Early	TCGA-2Z-A9JE-01	TCGA-2Z-A9JE	I	Early	TCGA-2Z-A9JE-01	TCGA-2Z-A9JE	I	Early	TCGA-BQ-7059-11	TCGA-BQ-7059	HC	HC
TCGA-2Z-A9JD-01	TCGA-2Z-A9JD	I	Early	TCGA-2Z-A9JG-01	TCGA-2Z-A9JG	I	Early	TCGA-2Z-A9JG-01	TCGA-2Z-A9JG	I	Early	TCGA-BQ-7059-01	TCGA-BQ-7059	I	Early
TCGA-2Z-A9JE-01	TCGA-2Z-A9JE	I	Early	TCGA-2Z-A9JJ-01	TCGA-2Z-A9JJ	I	Early	TCGA-2Z-A9JJ-01	TCGA-2Z-A9JJ	I	Early	TCGA-BQ-7061-11	TCGA-BQ-7061	HC	HC
TCGA-2Z-A9JG-01	TCGA-2Z-A9JG	I	Early	TCGA-2Z-A9JL-01	TCGA-2Z-A9JL	I	Early	TCGA-2Z-A9JL-01	TCGA-2Z-A9JL	I	Early	TCGA-BQ-7061-01	TCGA-BQ-7061	I	Early
TCGA-2Z-A9JJ-01	TCGA-2Z-A9JJ	I	Early	TCGA-2Z-A9JM-01	TCGA-2Z-A9JM	I	Early	TCGA-2Z-A9JM-01	TCGA-2Z-A9JM	I	Early	TCGA-DZ-6132-11	TCGA-DZ-6132	HC	HC
TCGA-2Z-A9JL-01	TCGA-2Z-A9JL	I	Early	TCGA-2Z-A9JN-01	TCGA-2Z-A9JN	I	Early	TCGA-2Z-A9JN-01	TCGA-2Z-A9JN	I	Early	TCGA-DZ-6132-01	TCGA-DZ-6132	I	Early
TCGA-2Z-A9JM-01	TCGA-2Z-A9JM	I	Early	TCGA-2Z-A9JO-01	TCGA-2Z-A9JO	I	Early	TCGA-2Z-A9JO-01	TCGA-2Z-A9JO	I	Early	TCGA-DZ-6133-11	TCGA-DZ-6133	HC	HC
TCGA-2Z-A9JN-01	TCGA-2Z-A9JN	I	Early	TCGA-2Z-A9JP-01	TCGA-2Z-A9JP	I	Early	TCGA-2Z-A9JP-01	TCGA-2Z-A9JP	I	Early	TCGA-DZ-6133-01	TCGA-DZ-6133	I	Early
TCGA-2Z-A9JO-01	TCGA-2Z-A9JO	I	Early	TCGA-2Z-A9JQ-01	TCGA-2Z-A9JQ	I	Early	TCGA-2Z-A9JQ-01	TCGA-2Z-A9JQ	I	Early	TCGA-DZ-6134-11	TCGA-DZ-6134	HC	HC
TCGA-2Z-A9JP-01	TCGA-2Z-A9JP	I	Early	TCGA-2Z-A9JR-01	TCGA-2Z-A9JR	I	Early	TCGA-2Z-A9JR-01	TCGA-2Z-A9JR	I	Early	TCGA-DZ-6134-01	TCGA-DZ-6134	I	Early
TCGA-2Z-A9JQ-01	TCGA-2Z-A9JQ	I	Early	TCGA-2Z-A9JS-01	TCGA-2Z-A9JS	I	Early	TCGA-2Z-A9JS-01	TCGA-2Z-A9JS	I	Early	TCGA-GL-6846-11	TCGA-GL-6846	HC	HC
TCGA-2Z-A9JR-01	TCGA-2Z-A9JR	I	Early	TCGA-2Z-A9JT-01	TCGA-2Z-A9JT	I	Early	TCGA-2Z-A9JT-01	TCGA-2Z-A9JT	I	Early	TCGA-GL-6846-01	TCGA-GL-6846	IV	Advanced
TCGA-2Z-A9JS-01	TCGA-2Z-A9JS	I	Early	TCGA-4A-A93W-01	TCGA-4A-A93W	I	Early	TCGA-4A-A93W-01	TCGA-4A-A93W	I	Early	TCGA-GL-7966-11	TCGA-GL-7966	HC	HC
TCGA-2Z-A9JT-01	TCGA-2Z-A9JT	I	Early	TCGA-A4-7287-01	TCGA-A4-7287	I	Early	TCGA-A4-7287-01	TCGA-A4-7287	I	Early	TCGA-GL-7966-01	TCGA-GL-7966	III	Advanced
TCGA-4A-A93W-01	TCGA-4A-A93W	I	Early	TCGA-A4-7583-01	TCGA-A4-7583	I	Early	TCGA-A4-7583-01	TCGA-A4-7583	I	Early	TCGA-GL-A59R-11	TCGA-GL-A59R	HC	HC
TCGA-A4-7287-01	TCGA-A4-7287	I	Early	TCGA-A4-7584-01	TCGA-A4-7584	I	Early	TCGA-A4-7584-01	TCGA-A4-7584	I	Early	TCGA-GL-A59R-01	TCGA-GL-A59R	III	Advanced
TCGA-A4-7583-01	TCGA-A4-7583	I	Early	TCGA-A4-7734-01	TCGA-A4-7734	I	Early	TCGA-A4-7734-01	TCGA-A4-7734	I	Early	TCGA-GL-A9DE-11	TCGA-GL-A9DE	HC	HC
TCGA-A4-7584-01	TCGA-A4-7584	I	Early	TCGA-A4-7828-01	TCGA-A4-7828	I	Early	TCGA-A4-7828-01	TCGA-A4-7828	I	Early	TCGA-GL-A9DE-01	TCGA-GL-A9DE	I	Early
TCGA-A4-7734-01	TCGA-A4-7734	I	Early	TCGA-A4-7996-01	TCGA-A4-7996	I	Early	TCGA-A4-7996-01	TCGA-A4-7996	I	Early	TCGA-P4-A5E8-11	TCGA-P4-A5E8	HC	HC
TCGA-A4-7828-01	TCGA-A4-7828	I	Early	TCGA-A4-7997-01	TCGA-A4-7997	I	Early	TCGA-A4-7997-01	TCGA-A4-7997	I	Early	TCGA-P4-A5E8-01	TCGA-P4-A5E8	III	Advanced
TCGA-A4-7996-01	TCGA-A4-7996	I	Early	TCGA-A4-8098-01	TCGA-A4-8098	I	Early	TCGA-A4-8098-01	TCGA-A4-8098	I	Early	TCGA-P4-A5ED-11	TCGA-P4-A5ED	HC	HC
TCGA-A4-7997-01	TCGA-A4-7997	I	Early	TCGA-A4-8311-01	TCGA-A4-8311	I	Early	TCGA-A4-8311-01	TCGA-A4-8	I	Early	TCGA-P4-A5ED-01	TCGA-P4-A5ED	I	Early
TCGA-A4-8098-01	TCGA-A4-8098	I	Early	TCGA-A4-8312-01	TCGA-A4-8312	I	Early	TCGA-A4-8312-01	TCGA-A4-8312	I	Early	TCGA-Y8-A8RY-11	TCGA-Y8-A8RY	HC	HC
TCGA-A4-8311-01	TCGA-A4-8311	I	Early	TCGA-A4-8515-01	TCGA-A4-8515	I	Early	TCGA-A4-8515-01	TCGA-A4-8515	I	Early	TCGA-Y8-A8RY-01	TCGA-Y8-A8RY	I	Early
TCGA-A4-8312-01	TCGA-A4-8312	I	Early	TCGA-A4-8517-01	TCGA-A4-8517	I	Early	TCGA-A4-8517-01	TCGA-A4-8517	I	Early
TCGA-A4-8515-01	TCGA-A4-8515	I	Early	TCGA-A4-8518-01	TCGA-A4-8518	I	Early	TCGA-A4-8518-01	TCGA-A4-8518	I	Early
TCGA-A4-8517-01	TCGA-A4-8517	I	Early	TCGA-A4-8630-01	TCGA-A4-8630	I	Early	TCGA-A4-8630-01	TCGA-A4-8630	I	Early
TCGA-A4-8518-01	TCGA-A4-8518	I	Early	TCGA-A4-A48D-01	TCGA-A4-A48D	I	Early	TCGA-A4-A48D-01	TCGA-A4-A48D	I	Early
TCGA-A4-8630-01	TCGA-A4-8630	I	Early	TCGA-A4-A4ZT-01	TCGA-A4-A4ZT	I	Early	TCGA-A4-A4ZT-01	TCGA-A4-A4ZT	I	Early
TCGA-A4-A48D-01	TCGA-A4-A48D	I	Early	TCGA-A4-A5DU-01	TCGA-A4-A5DU	I	Early	TCGA-A4-A5DU-01	TCGA-A4-A5DU	I	Early
TCGA-A4-A4ZT-01	TCGA-A4-A4ZT	I	Early	TCGA-A4-A5Y0-01	TCGA-A4-A5Y0	I	Early	TCGA-A4-A5Y0-01	TCGA-A4-A5Y0	I	Early
TCGA-A4-A5DU-01	TCGA-A4-A5DU	I	Early	TCGA-A4-A6HP-01	TCGA-A4-A6HP	I	Early	TCGA-A4-A6HP-01	TCGA-A4-A6HP	I	Early
TCGA-A4-A5Y0-01	TCGA-A4-A5Y0	I	Early	TCGA-A4-A772-01	TCGA-A4-A772	I	Early	TCGA-A4-A772-01	TCGA-A4-A772	I	Early
TCGA-A4-A6HP-01	TCGA-A4-A6HP	I	Early	TCGA-AL-3471-01	TCGA-AL-3471	I	Early	TCGA-AL-3471-01	TCGA-AL-3471	I	Early
TCGA-A4-A772-01	TCGA-A4-A772	I	Early	TCGA-AT-A5NU-01	TCGA-AT-A5NU	I	Early	TCGA-AT-A5NU-01	TCGA-AT-A5NU	I	Early
TCGA-AL-3471-01	TCGA-AL-3471	I	Early	TCGA-B1-A47N-01	TCGA-B1-A47N	I	Early	TCGA-B1-A47N-01	TCGA-B1-A47N	I	Early
TCGA-AT-A5NU-01	TCGA-AT-A5NU	I	Early	TCGA-B1-A47O-01	TCGA-B1-A47O	I	Early	TCGA-B1-A47O-01	TCGA-B1-A47O	I	Early
TCGA-B1-A47N-01	TCGA-B1-A47N	I	Early	TCGA-B1-A654-01	TCGA-B1-A654	I	Early	TCGA-B1-A654-01	TCGA-B1-A654	I	Early
TCGA-B1-A47O-01	TCGA-B1-A47O	I	Early	TCGA-B1-A655-01	TCGA-B1-A655	I	Early	TCGA-B1-A655-01	TCGA-B1-A655	I	Early
TCGA-B1-A654-01	TCGA-B1-A654	I	Early	TCGA-B1-A656-01	TCGA-B1-A656	I	Early	TCGA-B1-A656-01	TCGA-B1-A656	I	Early
TCGA-B1-A655-01	TCGA-B1-A655	I	Early	TCGA-B1-A657-01	TCGA-B1-A657	I	Early	TCGA-B1-A657-01	TCGA-B1-A657	I	Early
TCGA-B1-A656-01	TCGA-B1-A656	I	Early	TCGA-B3-3926-01	TCGA-B3-3926	I	Early	TCGA-B3-3926-01	TCGA-B3-3926	I	Early
TCGA-B1-A657-01	TCGA-B1-A657	I	Early	TCGA-B3-4103-01	TCGA-B3-4103	I	Early	TCGA-B3-4103-01	TCGA-B3-4103	I	Early
TCGA-B3-3926-01	TCGA-B3-3926	I	Early	TCGA-B3-8121-01	TCGA-B3-8121	I	Early	TCGA-B3-8121-01	TCGA-B3-8121	I	Early
TCGA-B3-4103-01	TCGA-B3-4103	I	Early	TCGA-B3-A6W5-01	TCGA-B3-A6W5	I	Early	TCGA-B3-A6W5-01	TCGA-B3-A6W5	I	Early
TCGA-B3-8121-01	TCGA-B3-8121	I	Early	TCGA-B9-4113-01	TCGA-B9-4113	I	Early	TCGA-B9-4113-01	TCGA-B9-4113	I	Early
TCGA-B3-A6W5-01	TCGA-B3-A6W5	I	Early	TCGA-B9-4115-01	TCGA-B9-4115	I	Early	TCGA-B9-4115-01	TCGA-B9-4115	I	Early
TCGA-B9-4113-01	TCGA-B9-4113	I	Early	TCGA-B9-A5W7-01	TCGA-B9-A5W7	I	Early	TCGA-B9-A5W7-01	TCGA-B9-A5W7	I	Early
TCGA-B9-4115-01	TCGA-B9-4115	I	Early	TCGA-B9-A5W9-01	TCGA-B9-A5W9	I	Early	TCGA-B9-A5W9-01	TCGA-B9-A5W9	I	Early
TCGA-B9-A5W7-01	TCGA-B9-A5W7	I	Early	TCGA-B9-A8YH-01	TCGA-B9-A8YH	I	Early	TCGA-B9-A8YH-01	TCGA-B9-A8YH	I	Early
TCGA-B9-A5W9-01	TCGA-B9-A5W9	I	Early	TCGA-B9-A8YI-01	TCGA-B9-A8YI	I	Early	TCGA-B9-A8YI-01	TCGA-B9-A8YI	I	Early
TCGA-B9-A8YH-01	TCGA-B9-A8YH	I	Early	TCGA-BQ-5876-01	TCGA-BQ-5876	I	Early	TCGA-BQ-5876-01	TCGA-BQ-5876	I	Early
TCGA-B9-A8YI-01	TCGA-B9-A8YI	I	Early	TCGA-BQ-5881-01	TCGA-BQ-5881	I	Early	TCGA-BQ-5881-01	TCGA-BQ-5881	I	Early
TCGA-BQ-5876-01	TCGA-BQ-5876	I	Early	TCGA-BQ-5883-01	TCGA-BQ-5883	I	Early	TCGA-BQ-5883-01	TCGA-BQ-5883	I	Early
TCGA-BQ-5881-01	TCGA-BQ-5881	I	Early	TCGA-BQ-5884-01	TCGA-BQ-5884	I	Early	TCGA-BQ-5884-01	TCGA-BQ-5884	I	Early
TCGA-BQ-5883-01	TCGA-BQ-5883	I	Early	TCGA-BQ-5888-01	TCGA-BQ-5888	I	Early	TCGA-BQ-5888-01	TCGA-BQ-5888	I	Early
TCGA-BQ-5884-01	TCGA-BQ-5884	I	Early	TCGA-BQ-5892-01	TCGA-BQ-5892	I	Early	TCGA-BQ-5892-01	TCGA-BQ-5892	I	Early
TCGA-BQ-5888-01	TCGA-BQ-5888	I	Early	TCGA-BQ-7045-01	TCGA-BQ-7045	I	Early	TCGA-BQ-7045-01	TCGA-BQ-7045	I	Early
TCGA-BQ-5892-01	TCGA-BQ-5892	I	Early	TCGA-BQ-7046-01	TCGA-BQ-7046	I	Early	TCGA-BQ-7046-01	TCGA-BQ-7046	I	Early
TCGA-BQ-7045-01	TCGA-BQ-7045	I	Early	TCGA-BQ-7049-01	TCGA-BQ-7049	I	Early	TCGA-BQ-7049-01	TCGA-BQ-7049	I	Early
TCGA-BQ-7046-01	TCGA-BQ-7046	I	Early	TCGA-BQ-7050-01	TCGA-BQ-7050	I	Early	TCGA-BQ-7050-01	TCGA-BQ-7050	I	Early
TCGA-BQ-7049-01	TCGA-BQ-7049	I	Early	TCGA-BQ-7055-01	TCGA-BQ-7055	I	Early	TCGA-BQ-7055-01	TCGA-BQ-7055	I	Early
TCGA-BQ-7050-01	TCGA-BQ-7050	I	Early	TCGA-BQ-7059-01	TCGA-BQ-7059	I	Early	TCGA-BQ-7059-01	TCGA-BQ-7059	I	Early
TCGA-BQ-7055-01	TCGA-BQ-7055	I	Early	TCGA-BQ-7060-01	TCGA-BQ-7060	I	Early	TCGA-BQ-7060-01	TCGA-BQ-7060	I	Early
TCGA-BQ-7059-01	TCGA-BQ-7059	I	Early	TCGA-BQ-7061-01	TCGA-BQ-7061	I	Early	TCGA-BQ-7061-01	TCGA-BQ-7061	I	Early
TCGA-BQ-7060-01	TCGA-BQ-7060	I	Early	TCGA-BQ-7062-01	TCGA-BQ-7062	I	Early	TCGA-BQ-7062-01	TCGA-BQ-7062	I	Early
TCGA-BQ-7061-01	TCGA-BQ-7061	I	Early	TCGA-DW-5560-01	TCGA-DW-5560	I	Early	TCGA-DW-5560-01	TCGA-DW-5560	I	Early
TCGA-BQ-7062-01	TCGA-BQ-7062	I	Early	TCGA-DW-5561-01	TCGA-DW-5561	I	Early	TCGA-DW-5561-01	TCGA-DW-5561	I	Early
TCGA-DW-5560-01	TCGA-DW-5560	I	Early	TCGA-DW-7834-01	TCGA-DW-7834	I	Early	TCGA-DW-7834-01	TCGA-DW-7834	I	Early
TCGA-DW-5561-01	TCGA-DW-5561	I	Early	TCGA-DW-7836-01	TCGA-DW-7836	I	Early	TCGA-DW-7836-01	TCGA-DW-7836	I	Early
TCGA-DW-7834-01	TCGA-DW-7834	I	Early	TCGA-DW-7837-01	TCGA-DW-7837	I	Early	TCGA-DW-7837-01	TCGA-DW-7837	I	Early
TCGA-DW-7836-01	TCGA-DW-7836	I	Early	TCGA-DW-7838-01	TCGA-DW-7838	I	Early	TCGA-DW-7838-01	TCGA-DW-7838	I	Early
TCGA-DW-7837-01	TCGA-DW-7837	I	Early	TCGA-DW-7839-01	TCGA-DW-7839	I	Early	TCGA-DW-7839-01	TCGA-DW-7839	I	Early
TCGA-DW-7838-01	TCGA-DW-7838	I	Early	TCGA-DW-7840-01	TCGA-DW-7840	I	Early	TCGA-DW-7840-01	TCGA-DW-7840	I	Early
TCGA-DW-7839-01	TCGA-DW-7839	I	Early	TCGA-DW-7841-01	TCGA-DW-7841	I	Early	TCGA-DW-7841-01	TCGA-DW-7841	I	Early
TCGA-DW-7840-01	TCGA-DW-7840	I	Early	TCGA-DW-7842-01	TCGA-DW-7842	I	Early	TCGA-DW-7842-01	TCGA-DW-7842	I	Early
TCGA-DW-7841-01	TCGA-DW-7841	I	Early	TCGA-DW-7963-01	TCGA-DW-7963	I	Early	TCGA-DW-7963-01	TCGA-DW-7963	I	Early
TCGA-DW-7842-01	TCGA-DW-7842	I	Early	TCGA-DZ-6132-01	TCGA-DZ-6132	I	Early	TCGA-DZ-6132-01	TCGA-DZ-6132	I	Early
TCGA-DW-7963-01	TCGA-DW-7963	I	Early	TCGA-DZ-6133-01	TCGA-DZ-6133	I	Early	TCGA-DZ-6133-01	TCGA-DZ-6133	I	Early
TCGA-DZ-6132-01	TCGA-DZ-6132	I	Early	TCGA-DZ-6134-01	TCGA-DZ-6134	I	Early	TCGA-DZ-6134-01	TCGA-DZ-6134	I	Early
TCGA-DZ-6133-01	TCGA-DZ-6133	I	Early	TCGA-DZ-6135-01	TCGA-DZ-6135	I	Early	TCGA-DZ-6135-01	TCGA-DZ-6135	I	Early
TCGA-DZ-6134-01	TCGA-DZ-6134	I	Early	TCGA-EV-5901-01	TCGA-EV-5901	I	Early	TCGA-EV-5901-01	TCGA-EV-5901	I	Early
TCGA-DZ-6135-01	TCGA-DZ-6135	I	Early	TCGA-EV-5902-01	TCGA-EV-5902	I	Early	TCGA-EV-5902-01	TCGA-EV-5902	I	Early
TCGA-EV-5901-01	TCGA-EV-5901	I	Early	TCGA-EV-5903-01	TCGA-EV-5903	I	Early	TCGA-EV-5903-01	TCGA-EV-5903	I	Early
TCGA-EV-5902-01	TCGA-EV-5902	I	Early	TCGA-F9-A7Q0-01	TCGA-F9-A7Q0	I	Early	TCGA-F9-A7Q0-01	TCGA-F9-A7Q0	I	Early
TCGA-EV-5903-01	TCGA-EV-5903	I	Early	TCGA-F9-A7VF-01	TCGA-F9-A7VF	I	Early	TCGA-F9-A7VF-01	TCGA-F9-A7VF	I	Early
TCGA-F9-A7Q0-01	TCGA-F9-A7Q0	I	Early	TCGA-G7-6790-01	TCGA-G7-6790	I	Early	TCGA-G7-6790-01	TCGA-G7-6790	I	Early
TCGA-F9-A7VF-01	TCGA-F9-A7VF	I	Early	TCGA-G7-6792-01	TCGA-G7-6792	I	Early	TCGA-G7-6792-01	TCGA-G7-6792	I	Early
TCGA-G7-6790-01	TCGA-G7-6790	I	Early	TCGA-G7-6795-01	TCGA-G7-6795	I	Early	TCGA-G7-6795-01	TCGA-G7-6795	I	Early
TCGA-G7-6792-01	TCGA-G7-6792	I	Early	TCGA-G7-6796-01	TCGA-G7-6796	I	Early	TCGA-G7-6796-01	TCGA-G7-6796	I	Early
TCGA-G7-6795-01	TCGA-G7-6795	I	Early	TCGA-G7-7502-01	TCGA-G7-7502	I	Early	TCGA-G7-7502-01	TCGA-G7-7502	I	Early
TCGA-G7-6796-01	TCGA-G7-6796	I	Early	TCGA-G7-A4TM-01	TCGA-G7-A4TM	I	Early	TCGA-G7-A4TM-01	TCGA-G7-A4TM	I	Early
TCGA-G7-7502-01	TCGA-G7-7502	I	Early	TCGA-G7-A8LC-01	TCGA-G7-A8LC	I	Early	TCGA-G7-A8LC-01	TCGA-G7-A8LC	I	Early
TCGA-G7-A4TM-01	TCGA-G7-A4TM	I	Early	TCGA-G7-A8LE-01	TCGA-G7-A8LE	I	Early	TCGA-G7-A8LE-01	TCGA-G7-A8LE	I	Early
TCGA-G7-A8LC-01	TCGA-G7-A8LC	I	Early	TCGA-GL-7773-01	TCGA-GL-7773	I	Early	TCGA-GL-7773-01	TCGA-GL-7773	I	Early
TCGA-G7-A8LE-01	TCGA-G7-A8LE	I	Early	TCGA-GL-8500-01	TCGA-GL-8500	I	Early	TCGA-GL-8500-01	TCGA-GL-8500	I	Early
TCGA-GL-7773-01	TCGA-GL-7773	I	Early	TCGA-GL-A4EM-01	TCGA-GL-A4EM	I	Early	TCGA-GL-A4EM-01	TCGA-GL-A4EM	I	Early
TCGA-GL-8500-01	TCGA-GL-8500	I	Early	TCGA-GL-A59T-01	TCGA-GL-A59T	I	Early	TCGA-GL-A59T-01	TCGA-GL-A59T	I	Early
TCGA-GL-A4EM-01	TCGA-GL-A4EM	I	Early	TCGA-GL-A9DC-01	TCGA-GL-A9DC	I	Early	TCGA-GL-A9DC-01	TCGA-GL-A9DC	I	Early
TCGA-GL-A59T-01	TCGA-GL-A59T	I	Early	TCGA-GL-A9DD-01	TCGA-GL-A9DD	I	Early	TCGA-GL-A9DD-01	TCGA-GL-A9DD	I	Early
TCGA-GL-A9DC-01	TCGA-GL-A9DC	I	Early	TCGA-GL-A9DE-01	TCGA-GL-A9DE	I	Early	TCGA-GL-A9DE-01	TCGA-GL-A9DE	I	Early
TCGA-GL-A9DD-01	TCGA-GL-A9DD	I	Early	TCGA-HE-7128-01	TCGA-HE-7128	I	Early	TCGA-HE-7128-01	TCGA-HE-7128	I	Early
TCGA-GL-A9DE-01	TCGA-GL-A9DE	I	Early	TCGA-HE-A5NF-01	TCGA-HE-A5NF	I	Early	TCGA-HE-A5NF-01	TCGA-HE-A5NF	I	Early
TCGA-HE-7128-01	TCGA-HE-7128	I	Early	TCGA-HE-A5NH-01	TCGA-HE-A5NH	I	Early	TCGA-HE-A5NH-01	TCGA-HE-A5NH	I	Early
TCGA-HE-A5NF-01	TCGA-HE-A5NF	I	Early	TCGA-HE-A5NI-01	TCGA-HE-A5NI	I	Early	TCGA-HE-A5NI-01	TCGA-HE-A5NI	I	Early
TCGA-HE-A5NH-01	TCGA-HE-A5NH	I	Early	TCGA-HE-A5NL-01	TCGA-HE-A5NL	I	Early	TCGA-HE-A5NL-01	TCGA-HE-A5NL	I	Early
TCGA-HE-A5NI-01	TCGA-HE-A5NI	I	Early	TCGA-IA-A40X-01	TCGA-IA-A40X	I	Early	TCGA-IA-A40X-01	TCGA-IA-A40X	I	Early
TCGA-HE-A5NL-01	TCGA-HE-A5NL	I	Early	TCGA-IA-A83V-01	TCGA-IA-A83V	I	Early	TCGA-IA-A83V-01	TCGA-IA-A83V	I	Early
TCGA-IA-A40X-01	TCGA-IA-A40X	I	Early	TCGA-IA-A83W-01	TCGA-IA-A83W	I	Early	TCGA-IA-A83W-01	TCGA-IA-A83W	I	Early
TCGA-IA-A83V-01	TCGA-IA-A83V	I	Early	TCGA-IZ-8196-01	TCGA-IZ-8196	I	Early	TCGA-IZ-8196-01	TCGA-IZ-8196	I	Early
TCGA-IA-A83W-01	TCGA-IA-A83W	I	Early	TCGA-IZ-A6M8-01	TCGA-IZ-A6M8	I	Early	TCGA-IZ-A6M8-01	TCGA-IZ-A6M8	I	Early
TCGA-IZ-8196-01	TCGA-IZ-8196	I	Early	TCGA-IZ-A6M9-01	TCGA-IZ-A6M9	I	Early	TCGA-IZ-A6M9-01	TCGA-IZ-A6M9	I	Early
TCGA-IZ-A6M8-01	TCGA-IZ-A6M8	I	Early	TCGA-J7-6720-01	TCGA-J7-6720	I	Early	TCGA-J7-6720-01	TCGA-J7-6720	I	Early
TCGA-IZ-A6M9-01	TCGA-IZ-A6M9	I	Early	TCGA-J7-A8I2-01	TCGA-J7-A8I2	I	Early	TCGA-J7-A8I2-01	TCGA-J7-A8I2	I	Early
TCGA-J7-6720-01	TCGA-J7-6720	I	Early	TCGA-KV-A6GD-01	TCGA-KV-A6GD	I	Early	TCGA-KV-A6GD-01	TCGA-KV-A6GD	I	Early
TCGA-J7-A8I2-01	TCGA-J7-A8I2	I	Early	TCGA-KV-A6GE-01	TCGA-KV-A6GE	I	Early	TCGA-KV-A6GE-01	TCGA-KV-A6GE	I	Early
TCGA-KV-A6GD-01	TCGA-KV-A6GD	I	Early	TCGA-KV-A74V-01	TCGA-KV-A74V	I	Early	TCGA-KV-A74V-01	TCGA-KV-A74V	I	Early
TCGA-KV-A6GE-01	TCGA-KV-A6GE	I	Early	TCGA-MH-A55W-01	TCGA-MH-A55W	I	Early	TCGA-MH-A55W-01	TCGA-MH-A55W	I	Early
TCGA-KV-A74V-01	TCGA-KV-A74V	I	Early	TCGA-MH-A55Z-01	TCGA-MH-A55Z	I	Early	TCGA-MH-A55Z-01	TCGA-MH-A55Z	I	Early
TCGA-MH-A55W-01	TCGA-MH-A55W	I	Early	TCGA-MH-A560-01	TCGA-MH-A560	I	Early	TCGA-MH-A560-01	TCGA-MH-A560	I	Early
TCGA-MH-A55Z-01	TCGA-MH-A55Z	I	Early	TCGA-MH-A561-01	TCGA-MH-A561	I	Early	TCGA-MH-A561-01	TCGA-MH-A561	I	Early
TCGA-MH-A560-01	TCGA-MH-A560	I	Early	TCGA-MH-A562-01	TCGA-MH-A562	I	Early	TCGA-MH-A562-01	TCGA-MH-A562	I	Early
TCGA-MH-A561-01	TCGA-MH-A561	I	Early	TCGA-MH-A854-01	TCGA-MH-A854	I	Early	TCGA-MH-A854-01	TCGA-MH-A854	I	Early
TCGA-MH-A562-01	TCGA-MH-A562	I	Early	TCGA-MH-A856-01	TCGA-MH-A856	I	Early	TCGA-MH-A856-01	TCGA-MH-A856	I	Early
TCGA-MH-A854-01	TCGA-MH-A854	I	Early	TCGA-MH-A857-01	TCGA-MH-A857	I	Early	TCGA-MH-A857-01	TCGA-MH-A857	I	Early
TCGA-MH-A856-01	TCGA-MH-A856	I	Early	TCGA-O9-A75Z-01	TCGA-O9-A75Z	I	Early	TCGA-O9-A75Z-01	TCGA-O9-A75Z	I	Early
TCGA-MH-A857-01	TCGA-MH-A857	I	Early	TCGA-P4-A5E7-01	TCGA-P4-A5E7	I	Early	TCGA-P4-A5E7-01	TCGA-P4-A5E7	I	Early
TCGA-O9-A75Z-01	TCGA-O9-A75Z	I	Early	TCGA-P4-A5EB-01	TCGA-P4-A5EB	I	Early	TCGA-P4-A5EB-01	TCGA-P4-A5EB	I	Early
TCGA-P4-A5E7-01	TCGA-P4-A5E7	I	Early	TCGA-P4-A5ED-01	TCGA-P4-A5ED	I	Early	TCGA-P4-A5ED-01	TCGA-P4-A5ED	I	Early
TCGA-P4-A5EB-01	TCGA-P4-A5EB	I	Early	TCGA-P4-AAVM-01	TCGA-P4-AAVM	I	Early	TCGA-P4-AAVM-01	TCGA-P4-AAVM	I	Early
TCGA-P4-A5ED-01	TCGA-P4-A5ED	I	Early	TCGA-P4-AAVO-01	TCGA-P4-AAVO	I	Early	TCGA-P4-AAVO-01	TCGA-P4-AAVO	I	Early
TCGA-P4-AAVM-01	TCGA-P4-AAVM	I	Early	TCGA-PJ-A5Z8-01	TCGA-PJ-A5Z8	I	Early	TCGA-PJ-A5Z8-01	TCGA-PJ-A5Z8	I	Early
TCGA-P4-AAVO-01	TCGA-P4-AAVO	I	Early	TCGA-PJ-A5Z9-01	TCGA-PJ-A5Z9	I	Early	TCGA-PJ-A5Z9-01	TCGA-PJ-A5Z9	I	Early
TCGA-PJ-A5Z8-01	TCGA-PJ-A5Z8	I	Early	TCGA-SX-A71R-01	TCGA-SX-A71R	I	Early	TCGA-SX-A71R-01	TCGA-SX-A71R	I	Early
TCGA-PJ-A5Z9-01	TCGA-PJ-A5Z9	I	Early	TCGA-SX-A71S-01	TCGA-SX-A71S	I	Early	TCGA-SX-A71S-01	TCGA-SX-A71S	I	Early
TCGA-PJ-A8JU-01	TCGA-PJ-A8JU	I	Early	TCGA-SX-A71U-01	TCGA-SX-A71U	I	Early	TCGA-SX-A71U-01	TCGA-SX-A71U	I	Early
TCGA-SX-A71R-01	TCGA-SX-A71R	I	Early	TCGA-SX-A71V-01	TCGA-SX-A71V	I	Early	TCGA-SX-A71V-01	TCGA-SX-A71V	I	Early
TCGA-SX-A71S-01	TCGA-SX-A71S	I	Early	TCGA-SX-A71W-01	TCGA-SX-A71W	I	Early	TCGA-SX-A71W-01	TCGA-SX-A71W	I	Early
TCGA-SX-A71U-01	TCGA-SX-A71U	I	Early	TCGA-SX-A7SL-01	TCGA-SX-A7SL	I	Early	TCGA-SX-A7SL-01	TCGA-SX-A7SL	I	Early
TCGA-SX-A71V-01	TCGA-SX-A71V	I	Early	TCGA-SX-A7SN-01	TCGA-SX-A7SN	I	Early	TCGA-SX-A7SN-01	TCGA-SX-A7SN	I	Early
TCGA-SX-A71W-01	TCGA-SX-A71W	I	Early	TCGA-SX-A7SO-01	TCGA-SX-A7SO	I	Early	TCGA-SX-A7SO-01	TCGA-SX-A7SO	I	Early
TCGA-SX-A7SL-01	TCGA-SX-A7SL	I	Early	TCGA-SX-A7SP-01	TCGA-SX-A7SP	I	Early	TCGA-SX-A7SP-01	TCGA-SX-A7SP	I	Early
TCGA-SX-A7SN-01	TCGA-SX-A7SN	I	Early	TCGA-SX-A7SQ-01	TCGA-SX-A7SQ	I	Early	TCGA-SX-A7SQ-01	TCGA-SX-A7SQ	I	Early
TCGA-SX-A7SO-01	TCGA-SX-A7SO	I	Early	TCGA-SX-A7SS-01	TCGA-SX-A7SS	I	Early	TCGA-SX-A7SS-01	TCGA-SX-A7SS	I	Early
TCGA-SX-A7SP-01	TCGA-SX-A7SP	I	Early	TCGA-SX-A7SU-01	TCGA-SX-A7SU	I	Early	TCGA-SX-A7SU-01	TCGA-SX-A7SU	I	Early
TCGA-SX-A7SQ-01	TCGA-SX-A7SQ	I	Early	TCGA-UN-AAZ9-01	TCGA-UN-AAZ9	I	Early	TCGA-UN-AAZ9-01	TCGA-UN-AAZ9	I	Early
TCGA-SX-A7SS-01	TCGA-SX-A7SS	I	Early	TCGA-UZ-A9PJ-01	TCGA-UZ-A9PJ	I	Early	TCGA-UZ-A9PJ-01	TCGA-UZ-A9PJ	I	Early
TCGA-SX-A7SU-01	TCGA-SX-A7SU	I	Early	TCGA-UZ-A9PK-01	TCGA-UZ-A9PK	I	Early	TCGA-UZ-A9PK-01	TCGA-UZ-A9PK	I	Early
TCGA-UN-AAZ9-01	TCGA-UN-AAZ9	I	Early	TCGA-UZ-A9PO-01	TCGA-UZ-A9PO	I	Early	TCGA-UZ-A9PO-01	TCGA-UZ-A9PO	I	Early
TCGA-UZ-A9PJ-01	TCGA-UZ-A9PJ	I	Early	TCGA-UZ-A9PP-01	TCGA-UZ-A9PP	I	Early	TCGA-UZ-A9PP-01	TCGA-UZ-A9PP	I	Early
TCGA-UZ-A9PK-01	TCGA-UZ-A9PK	I	Early	TCGA-UZ-A9PR-01	TCGA-UZ-A9PR	I	Early	TCGA-UZ-A9PR-01	TCGA-UZ-A9PR	I	Early
TCGA-UZ-A9PO-01	TCGA-UZ-A9PO	I	Early	TCGA-UZ-A9PU-01	TCGA-UZ-A9PU	I	Early	TCGA-UZ-A9PU-01	TCGA-UZ-A9PU	I	Early
TCGA-UZ-A9PP-01	TCGA-UZ-A9PP	I	Early	TCGA-UZ-A9PV-01	TCGA-UZ-A9PV	I	Early	TCGA-UZ-A9PV-01	TCGA-UZ-A9PV	I	Early
TCGA-UZ-A9PR-01	TCGA-UZ-A9PR	I	Early	TCGA-UZ-A9PX-01	TCGA-UZ-A9PX	I	Early	TCGA-UZ-A9PX-01	TCGA-UZ-A9PX	I	Early
TCGA-UZ-A9PU-01	TCGA-UZ-A9PU	I	Early	TCGA-UZ-A9Q0-01	TCGA-UZ-A9Q0	I	Early	TCGA-UZ-A9Q0-01	TCGA-UZ-A9Q0	I	Early
TCGA-UZ-A9PV-01	TCGA-UZ-A9PV	I	Early	TCGA-UZ-A9Q1-01	TCGA-UZ-A9Q1	I	Early	TCGA-UZ-A9Q1-01	TCGA-UZ-A9Q1	I	Early
TCGA-UZ-A9PX-01	TCGA-UZ-A9PX	I	Early	TCGA-WN-A9G9-01	TCGA-WN-A9G9	I	Early	TCGA-WN-A9G9-01	TCGA-WN-A9G9	I	Early
TCGA-UZ-A9Q0-01	TCGA-UZ-A9Q0	I	Early	TCGA-WN-AB4C-01	TCGA-WN-AB4C	I	Early	TCGA-WN-AB4C-01	TCGA-WN-AB4C	I	Early
TCGA-UZ-A9Q1-01	TCGA-UZ-A9Q1	I	Early	TCGA-Y8-A894-01	TCGA-Y8-A894	I	Early	TCGA-Y8-A894-01	TCGA-Y8-A894	I	Early
TCGA-WN-A9G9-01	TCGA-WN-A9G9	I	Early	TCGA-Y8-A895-01	TCGA-Y8-A895	I	Early	TCGA-Y8-A895-01	TCGA-Y8-A895	I	Early
TCGA-WN-AB4C-01	TCGA-WN-AB4C	I	Early	TCGA-Y8-A897-01	TCGA-Y8-A897	I	Early	TCGA-Y8-A897-01	TCGA-Y8-A897	I	Early
TCGA-Y8-A894-01	TCGA-Y8-A894	I	Early	TCGA-Y8-A898-01	TCGA-Y8-A898	I	Early	TCGA-Y8-A898-01	TCGA-Y8-A898	I	Early
TCGA-Y8-A895-01	TCGA-Y8-A895	I	Early	TCGA-Y8-A8RY-01	TCGA-Y8-A8RY	I	Early	TCGA-Y8-A8RY-01	TCGA-Y8-A8RY	I	Early
TCGA-Y8-A897-01	TCGA-Y8-A897	I	Early	TCGA-Y8-A8RZ-01	TCGA-Y8-A8RZ	I	Early	TCGA-Y8-A8RZ-01	TCGA-Y8-A8RZ	I	Early
TCGA-Y8-A898-01	TCGA-Y8-A898	I	Early	TCGA-Y8-A8S0-01	TCGA-Y8-A8S0	I	Early	TCGA-Y8-A8S0-01	TCGA-Y8-A8S0	I	Early
TCGA-Y8-A8RY-01	TCGA-Y8-A8RY	I	Early	TCGA-Y8-A8S1-01	TCGA-Y8-A8S1	I	Early	TCGA-Y8-A8S1-01	TCGA-Y8-A8S1	I	Early
TCGA-Y8-A8RZ-01	TCGA-Y8-A8RZ	I	Early	TCGA-2K-A9WE-01	TCGA-2K-A9WE	II	Early	TCGA-2K-A9WE-01	TCGA-2K-A9WE	II	Early
TCGA-Y8-A8S0-01	TCGA-Y8-A8S0	I	Early	TCGA-2Z-A9J3-01	TCGA-2Z-A9J3	II	Early	TCGA-2Z-A9J3-01	TCGA-2Z-A9J3	II	Early
TCGA-Y8-A8S1-01	TCGA-Y8-A8S1	I	Early	TCGA-2Z-A9J5-01	TCGA-2Z-A9J5	II	Early	TCGA-2Z-A9J5-01	TCGA-2Z-A9J5	II	Early
TCGA-2K-A9WE-01	TCGA-2K-A9WE	II	Early	TCGA-4A-A93Y-01	TCGA-4A-A93Y	II	Early	TCGA-4A-A93Y-01	TCGA-4A-A93Y	II	Early
TCGA-2Z-A9J3-01	TCGA-2Z-A9J3	II	Early	TCGA-A4-7915-01	TCGA-A4-7915	II	Early	TCGA-A4-7915-01	TCGA-A4-7915	II	Early
TCGA-2Z-A9J5-01	TCGA-2Z-A9J5	II	Early	TCGA-A4-A5XZ-01	TCGA-A4-A5XZ	II	Early	TCGA-A4-A5XZ-01	TCGA-A4-A5XZ	II	Early
TCGA-4A-A93Y-01	TCGA-4A-A93Y	II	Early	TCGA-AL-3468-01	TCGA-AL-3468	II	Early	TCGA-AL-3468-01	TCGA-AL-3468	II	Early
TCGA-A4-7915-01	TCGA-A4-7915	II	Early	TCGA-AL-3473-01	TCGA-AL-3473	II	Early	TCGA-AL-3473-01	TCGA-AL-3473	II	Early
TCGA-A4-A5XZ-01	TCGA-A4-A5XZ	II	Early	TCGA-B1-7332-01	TCGA-B1-7332	II	Early	TCGA-B1-7332-01	TCGA-B1-7332	II	Early
TCGA-AL-3468-01	TCGA-AL-3468	II	Early	TCGA-B3-4104-01	TCGA-B3-4104	II	Early	TCGA-B3-4104-01	TCGA-B3-4104	II	Early
TCGA-AL-3473-01	TCGA-AL-3473	II	Early	TCGA-B9-7268-01	TCGA-B9-7268	II	Early	TCGA-B9-7268-01	TCGA-B9-7268	II	Early
TCGA-B1-7332-01	TCGA-B1-7332	II	Early	TCGA-B9-A5W8-01	TCGA-B9-A5W8	II	Early	TCGA-B9-A5W8-01	TCGA-B9-A5W8	II	Early
TCGA-B3-4104-01	TCGA-B3-4104	II	Early	TCGA-BQ-7051-01	TCGA-BQ-7051	II	Early	TCGA-BQ-7051-01	TCGA-BQ-7051	II	Early
TCGA-B9-7268-01	TCGA-B9-7268	II	Early	TCGA-HE-7129-01	TCGA-HE-7129	II	Early	TCGA-HE-7129-01	TCGA-HE-7129	II	Early
TCGA-B9-A5W8-01	TCGA-B9-A5W8	II	Early	TCGA-IZ-8195-01	TCGA-IZ-8195	II	Early	TCGA-IZ-8195-01	TCGA-IZ-8195	II	Early
TCGA-BQ-7051-01	TCGA-BQ-7051	II	Early	TCGA-MH-A855-01	TCGA-MH-A855	II	Early	TCGA-MH-A855-01	TCGA-MH-A855	II	Early
TCGA-HE-7129-01	TCGA-HE-7129	II	Early	TCGA-SX-A7SR-01	TCGA-SX-A7SR	II	Early	TCGA-SX-A7SR-01	TCGA-SX-A7SR	II	Early
TCGA-IZ-8195-01	TCGA-IZ-8195	II	Early	TCGA-UZ-A9PL-01	TCGA-UZ-A9PL	II	Early	TCGA-UZ-A9PL-01	TCGA-UZ-A9PL	II	Early
TCGA-MH-A855-01	TCGA-MH-A855	II	Early	TCGA-UZ-A9PM-01	TCGA-UZ-A9PM	II	Early	TCGA-UZ-A9PM-01	TCGA-UZ-A9PM	II	Early
TCGA-SX-A7SR-01	TCGA-SX-A7SR	II	Early	TCGA-UZ-A9PS-01	TCGA-UZ-A9PS	II	Early	TCGA-UZ-A9PS-01	TCGA-UZ-A9PS	II	Early
TCGA-UZ-A9PL-01	TCGA-UZ-A9PL	II	Early	TCGA-V9-A7HT-01	TCGA-V9-A7HT	II	Early	TCGA-V9-A7HT-01	TCGA-V9-A7HT	II	Early
TCGA-UZ-A9PM-01	TCGA-UZ-A9PM	II	Early	TCGA-2Z-A9JI-01	TCGA-2Z-A9JI	III	Advanced	TCGA-2Z-A9JI-01	TCGA-2Z-A9JI	III	Advanced
TCGA-UZ-A9PS-01	TCGA-UZ-A9PS	II	Early	TCGA-2Z-A9JK-01	TCGA-2Z-A9JK	III	Advanced	TCGA-2Z-A9JK-01	TCGA-2Z-A9JK	III	Advanced
TCGA-V9-A7HT-01	TCGA-V9-A7HT	II	Early	TCGA-5P-A9JU-01	TCGA-5P-A9JU	III	Advanced	TCGA-5P-A9JU-01	TCGA-5P-A9JU	III	Advanced
TCGA-2Z-A9JI-01	TCGA-2Z-A9JI	III	Advanced	TCGA-A4-7585-01	TCGA-A4-7585	III	Advanced	TCGA-A4-7585-01	TCGA-A4-7585	III	Advanced
TCGA-2Z-A9JK-01	TCGA-2Z-A9JK	III	Advanced	TCGA-A4-8310-01	TCGA-A4-8310	III	Advanced	TCGA-A4-8310-01	TCGA-A4-8310	III	Advanced
TCGA-5P-A9JU-01	TCGA-5P-A9JU	III	Advanced	TCGA-A4-8516-01	TCGA-A4-8516	III	Advanced	TCGA-A4-8516-01	TCGA-A4-8516	III	Advanced
TCGA-A4-7585-01	TCGA-A4-7585	III	Advanced	TCGA-A4-A5Y1-01	TCGA-A4-A5Y1	III	Advanced	TCGA-A4-A5Y1-01	TCGA-A4-A5Y1	III	Advanced
TCGA-A4-8310-01	TCGA-A4-8310	III	Advanced	TCGA-A4-A7UZ-01	TCGA-A4-A7UZ	III	Advanced	TCGA-A4-A7UZ-01	TCGA-A4-A7UZ	III	Advanced
TCGA-A4-8516-01	TCGA-A4-8516	III	Advanced	TCGA-AL-A5DJ-01	TCGA-AL-A5DJ	III	Advanced	TCGA-AL-A5DJ-01	TCGA-AL-A5DJ	III	Advanced
TCGA-A4-A5Y1-01	TCGA-A4-A5Y1	III	Advanced	TCGA-B1-5398-01	TCGA-B1-5398	III	Advanced	TCGA-B1-5398-01	TCGA-B1-5398	III	Advanced
TCGA-A4-A7UZ-01	TCGA-A4-A7UZ	III	Advanced	TCGA-B1-A47M-01	TCGA-B1-A47M	III	Advanced	TCGA-B1-A47M-01	TCGA-B1-A47M	III	Advanced
TCGA-AL-A5DJ-01	TCGA-AL-A5DJ	III	Advanced	TCGA-B3-3925-01	TCGA-B3-3925	III	Advanced	TCGA-B3-3925-01	TCGA-B3-3925	III	Advanced
TCGA-B1-5398-01	TCGA-B1-5398	III	Advanced	TCGA-B9-5155-01	TCGA-B9-5155	III	Advanced	TCGA-B9-5155-01	TCGA-B9-5155	III	Advanced
TCGA-B1-A47M-01	TCGA-B1-A47M	III	Advanced	TCGA-B9-A44B-01	TCGA-B9-A44B	III	Advanced	TCGA-B9-A44B-01	TCGA-B9-A44B	III	Advanced
TCGA-B3-3925-01	TCGA-B3-3925	III	Advanced	TCGA-B9-A69E-01	TCGA-B9-A69E	III	Advanced	TCGA-B9-A69E-01	TCGA-B9-A69E	III	Advanced
TCGA-B9-5155-01	TCGA-B9-5155	III	Advanced	TCGA-BQ-5875-01	TCGA-BQ-5875	III	Advanced	TCGA-BQ-5875-01	TCGA-BQ-5875	III	Advanced
TCGA-B9-A44B-01	TCGA-B9-A44B	III	Advanced	TCGA-BQ-5878-01	TCGA-BQ-5878	III	Advanced	TCGA-BQ-5878-01	TCGA-BQ-5878	III	Advanced
TCGA-B9-A69E-01	TCGA-B9-A69E	III	Advanced	TCGA-BQ-5879-01	TCGA-BQ-5879	III	Advanced	TCGA-BQ-5879-01	TCGA-BQ-5879	III	Advanced
TCGA-BQ-5875-01	TCGA-BQ-5875	III	Advanced	TCGA-BQ-5880-01	TCGA-BQ-5880	III	Advanced	TCGA-BQ-5880-01	TCGA-BQ-5880	III	Advanced
TCGA-BQ-5878-01	TCGA-BQ-5878	III	Advanced	TCGA-BQ-5882-01	TCGA-BQ-5882	III	Advanced	TCGA-BQ-5882-01	TCGA-BQ-5882	III	Advanced
TCGA-BQ-5879-01	TCGA-BQ-5879	III	Advanced	TCGA-BQ-5885-01	TCGA-BQ-5885	III	Advanced	TCGA-BQ-5885-01	TCGA-BQ-5885	III	Advanced
TCGA-BQ-5880-01	TCGA-BQ-5880	III	Advanced	TCGA-BQ-5886-01	TCGA-BQ-5886	III	Advanced	TCGA-BQ-5886-01	TCGA-BQ-5886	III	Advanced
TCGA-BQ-5882-01	TCGA-BQ-5882	III	Advanced	TCGA-BQ-5887-01	TCGA-BQ-5887	III	Advanced	TCGA-BQ-5887-01	TCGA-BQ-5887	III	Advanced
TCGA-BQ-5885-01	TCGA-BQ-5885	III	Advanced	TCGA-BQ-5890-01	TCGA-BQ-5890	III	Advanced	TCGA-BQ-5890-01	TCGA-BQ-5890	III	Advanced
TCGA-BQ-5886-01	TCGA-BQ-5886	III	Advanced	TCGA-BQ-5891-01	TCGA-BQ-5891	III	Advanced	TCGA-BQ-5891-01	TCGA-BQ-5891	III	Advanced
TCGA-BQ-5887-01	TCGA-BQ-5887	III	Advanced	TCGA-BQ-7044-01	TCGA-BQ-7044	III	Advanced	TCGA-BQ-7044-01	TCGA-BQ-7044	III	Advanced
TCGA-BQ-5890-01	TCGA-BQ-5890	III	Advanced	TCGA-BQ-7048-01	TCGA-BQ-7048	III	Advanced	TCGA-BQ-7048-01	TCGA-BQ-7048	III	Advanced
TCGA-BQ-5891-01	TCGA-BQ-5891	III	Advanced	TCGA-BQ-7053-01	TCGA-BQ-7053	III	Advanced	TCGA-BQ-7053-01	TCGA-BQ-7053	III	Advanced
TCGA-BQ-7044-01	TCGA-BQ-7044	III	Advanced	TCGA-BQ-7056-01	TCGA-BQ-7056	III	Advanced	TCGA-BQ-7056-01	TCGA-BQ-7056	III	Advanced
TCGA-BQ-7048-01	TCGA-BQ-7048	III	Advanced	TCGA-BQ-7058-01	TCGA-BQ-7058	III	Advanced	TCGA-BQ-7058-01	TCGA-BQ-7058	III	Advanced
TCGA-BQ-7053-01	TCGA-BQ-7053	III	Advanced	TCGA-F9-A4JJ-01	TCGA-F9-A4JJ	III	Advanced	TCGA-F9-A4JJ-01	TCGA-F9-A4JJ	III	Advanced
TCGA-BQ-7056-01	TCGA-BQ-7056	III	Advanced	TCGA-F9-A97G-01	TCGA-F9-A97G	III	Advanced	TCGA-F9-A97G-01	TCGA-F9-A97G	III	Advanced
TCGA-BQ-7058-01	TCGA-BQ-7058	III	Advanced	TCGA-G7-6797-01	TCGA-G7-6797	III	Advanced	TCGA-G7-6797-01	TCGA-G7-6797	III	Advanced
TCGA-DZ-6131-01	TCGA-DZ-6131	III	Advanced	TCGA-G7-7501-01	TCGA-G7-7501	III	Advanced	TCGA-G7-7501-01	TCGA-G7-7501	III	Advanced
TCGA-F9-A4JJ-01	TCGA-F9-A4JJ	III	Advanced	TCGA-G7-A8LD-01	TCGA-G7-A8LD	III	Advanced	TCGA-G7-A8LD-01	TCGA-G7-A8LD	III	Advanced
TCGA-F9-A97G-01	TCGA-F9-A97G	III	Advanced	TCGA-GL-7966-01	TCGA-GL-7966	III	Advanced	TCGA-GL-7966-01	TCGA-GL-7966	III	Advanced
TCGA-G7-6797-01	TCGA-G7-6797	III	Advanced	TCGA-GL-A59R-01	TCGA-GL-A59R	III	Advanced	TCGA-GL-A59R-01	TCGA-GL-A59R	III	Advanced
TCGA-G7-7501-01	TCGA-G7-7501	III	Advanced	TCGA-HE-7130-01	TCGA-HE-7130	III	Advanced	TCGA-HE-7130-01	TCGA-HE-7130	III	Advanced
TCGA-G7-A8LD-01	TCGA-G7-A8LD	III	Advanced	TCGA-IA-A40U-01	TCGA-IA-A40U	III	Advanced	TCGA-IA-A40U-01	TCGA-IA-A40U	III	Advanced
TCGA-GL-7966-01	TCGA-GL-7966	III	Advanced	TCGA-IA-A40Y-01	TCGA-IA-A40Y	III	Advanced	TCGA-IA-A40Y-01	TCGA-IA-A40Y	III	Advanced
TCGA-GL-A59R-01	TCGA-GL-A59R	III	Advanced	TCGA-J7-8537-01	TCGA-J7-8537	III	Advanced	TCGA-J7-8537-01	TCGA-J7-8537	III	Advanced
TCGA-HE-7130-01	TCGA-HE-7130	III	Advanced	TCGA-P4-A5E6-01	TCGA-P4-A5E6	III	Advanced	TCGA-P4-A5E6-01	TCGA-P4-A5E6	III	Advanced
TCGA-IA-A40U-01	TCGA-IA-A40U	III	Advanced	TCGA-P4-A5E8-01	TCGA-P4-A5E8	III	Advanced	TCGA-P4-A5E8-01	TCGA-P4-A5E8	III	Advanced
TCGA-IA-A40Y-01	TCGA-IA-A40Y	III	Advanced	TCGA-P4-A5EA-01	TCGA-P4-A5EA	III	Advanced	TCGA-P4-A5EA-01	TCGA-P4-A5EA	III	Advanced
TCGA-J7-8537-01	TCGA-J7-8537	III	Advanced	TCGA-P4-AAVK-01	TCGA-P4-AAVK	III	Advanced	TCGA-P4-AAVK-01	TCGA-P4-AAVK	III	Advanced
TCGA-P4-A5E6-01	TCGA-P4-A5E6	III	Advanced	TCGA-P4-AAVL-01	TCGA-P4-AAVL	III	Advanced	TCGA-P4-AAVL-01	TCGA-P4-AAVL	III	Advanced
TCGA-P4-A5E8-01	TCGA-P4-A5E8	III	Advanced	TCGA-Q2-A5QZ-01	TCGA-Q2-A5QZ	III	Advanced	TCGA-Q2-A5QZ-01	TCGA-Q2-A5QZ	III	Advanced
TCGA-P4-A5EA-01	TCGA-P4-A5EA	III	Advanced	TCGA-UZ-A9PN-01	TCGA-UZ-A9PN	III	Advanced	TCGA-UZ-A9PN-01	TCGA-UZ-A9PN	III	Advanced
TCGA-P4-AAVK-01	TCGA-P4-AAVK	III	Advanced	TCGA-UZ-A9PQ-01	TCGA-UZ-A9PQ	III	Advanced	TCGA-UZ-A9PQ-01	TCGA-UZ-A9PQ	III	Advanced
TCGA-P4-AAVL-01	TCGA-P4-AAVL	III	Advanced	TCGA-UZ-A9PZ-01	TCGA-UZ-A9PZ	III	Advanced	TCGA-UZ-A9PZ-01	TCGA-UZ-A9PZ	III	Advanced
TCGA-Q2-A5QZ-01	TCGA-Q2-A5QZ	III	Advanced	TCGA-Y8-A896-01	TCGA-Y8-A896	III	Advanced	TCGA-Y8-A896-01	TCGA-Y8-A896	III	Advanced
TCGA-UZ-A9PN-01	TCGA-UZ-A9PN	III	Advanced	TCGA-2Z-A9J7-01	TCGA-2Z-A9J7	IV	Advanced	TCGA-2Z-A9J7-01	TCGA-2Z-A9J7	IV	Advanced
TCGA-UZ-A9PQ-01	TCGA-UZ-A9PQ	III	Advanced	TCGA-4A-A93X-01	TCGA-4A-A93X	IV	Advanced	TCGA-4A-A93X-01	TCGA-4A-A93X	IV	Advanced
TCGA-UZ-A9PZ-01	TCGA-UZ-A9PZ	III	Advanced	TCGA-A4-A57E-01	TCGA-A4-A57E	IV	Advanced	TCGA-A4-A57E-01	TCGA-A4-A57E	IV	Advanced
TCGA-Y8-A896-01	TCGA-Y8-A896	III	Advanced	TCGA-AL-3466-01	TCGA-AL-3466	IV	Advanced	TCGA-AL-3466-01	TCGA-AL-3466	IV	Advanced
TCGA-2Z-A9J7-01	TCGA-2Z-A9J7	IV	Advanced	TCGA-AL-7173-01	TCGA-AL-7173	IV	Advanced	TCGA-AL-7173-01	TCGA-AL-7173	IV	Advanced
TCGA-4A-A93X-01	TCGA-4A-A93X	IV	Advanced	TCGA-BQ-5877-01	TCGA-BQ-5877	IV	Advanced	TCGA-BQ-5877-01	TCGA-BQ-5877	IV	Advanced
TCGA-A4-A57E-01	TCGA-A4-A57E	IV	Advanced	TCGA-BQ-5889-01	TCGA-BQ-5889	IV	Advanced	TCGA-BQ-5889-01	TCGA-BQ-5889	IV	Advanced
TCGA-AL-3466-01	TCGA-AL-3466	IV	Advanced	TCGA-BQ-5893-01	TCGA-BQ-5893	IV	Advanced	TCGA-BQ-5893-01	TCGA-BQ-5893	IV	Advanced
TCGA-AL-7173-01	TCGA-AL-7173	IV	Advanced	TCGA-BQ-5894-01	TCGA-BQ-5894	IV	Advanced	TCGA-BQ-5894-01	TCGA-BQ-5894	IV	Advanced
TCGA-BQ-5877-01	TCGA-BQ-5877	IV	Advanced	TCGA-F9-A8NY-01	TCGA-F9-A8NY	IV	Advanced	TCGA-F9-A8NY-01	TCGA-F9-A8NY	IV	Advanced
TCGA-BQ-5889-01	TCGA-BQ-5889	IV	Advanced	TCGA-G7-6789-01	TCGA-G7-6789	IV	Advanced	TCGA-G7-6789-01	TCGA-G7-6789	IV	Advanced
TCGA-BQ-5893-01	TCGA-BQ-5893	IV	Advanced	TCGA-G7-6793-01	TCGA-G7-6793	IV	Advanced	TCGA-G7-6793-01	TCGA-G7-6793	IV	Advanced
TCGA-BQ-5894-01	TCGA-BQ-5894	IV	Advanced	TCGA-G7-A8LB-01	TCGA-G7-A8LB	IV	Advanced	TCGA-G7-A8LB-01	TCGA-G7-A8LB	IV	Advanced
TCGA-F9-A8NY-01	TCGA-F9-A8NY	IV	Advanced	TCGA-GL-6846-01	TCGA-GL-6846	IV	Advanced	TCGA-GL-6846-01	TCGA-GL-6846	IV	Advanced
TCGA-G7-6789-01	TCGA-G7-6789	IV	Advanced	TCGA-SX-A7SM-01	TCGA-SX-A7SM	IV	Advanced	TCGA-SX-A7SM-01	TCGA-SX-A7SM	IV	Advanced
TCGA-G7-6793-01	TCGA-G7-6793	IV	Advanced	TCGA-5P-A9JV-01	TCGA-5P-A9JV	TNS	TNS	TCGA-5P-A9JV-01	TCGA-5P-A9JV	TNS	TNS
TCGA-G7-A8LB-01	TCGA-G7-A8LB	IV	Advanced	TCGA-5P-A9JW-01	TCGA-5P-A9JW	TNS	TNS	TCGA-5P-A9JW-01	TCGA-5P-A9JW	TNS	TNS
TCGA-GL-6846-01	TCGA-GL-6846	IV	Advanced	TCGA-5P-A9JY-01	TCGA-5P-A9JY	TNS	TNS	TCGA-5P-A9JY-01	TCGA-5P-A9JY	TNS	TNS
TCGA-SX-A7SM-01	TCGA-SX-A7SM	IV	Advanced	TCGA-5P-A9JZ-01	TCGA-5P-A9JZ	TNS	TNS	TCGA-5P-A9JZ-01	TCGA-5P-A9JZ	TNS	TNS
TCGA-5P-A9JV-01	TCGA-5P-A9JV	TNS	TNS	TCGA-5P-A9K0-01	TCGA-5P-A9K0	TNS	TNS	TCGA-5P-A9K0-01	TCGA-5P-A9K0	TNS	TNS
TCGA-5P-A9JW-01	TCGA-5P-A9JW	TNS	TNS	TCGA-5P-A9K2-01	TCGA-5P-A9K2	TNS	TNS	TCGA-5P-A9K2-01	TCGA-5P-A9K2	TNS	TNS
TCGA-5P-A9JY-01	TCGA-5P-A9JY	TNS	TNS	TCGA-5P-A9K3-01	TCGA-5P-A9K3	TNS	TNS	TCGA-5P-A9K3-01	TCGA-5P-A9K3	TNS	TNS
TCGA-5P-A9JZ-01	TCGA-5P-A9JZ	TNS	TNS	TCGA-5P-A9K4-01	TCGA-5P-A9K4	TNS	TNS	TCGA-5P-A9K4-01	TCGA-5P-A9K4	TNS	TNS
TCGA-5P-A9K0-01	TCGA-5P-A9K0	TNS	TNS	TCGA-5P-A9K6-01	TCGA-5P-A9K6	TNS	TNS	TCGA-5P-A9K6-01	TCGA-5P-A9K6	TNS	TNS
TCGA-5P-A9K2-01	TCGA-5P-A9K2	TNS	TNS	TCGA-5P-A9K8-01	TCGA-5P-A9K8	TNS	TNS	TCGA-5P-A9K8-01	TCGA-5P-A9K8	TNS	TNS
TCGA-5P-A9K3-01	TCGA-5P-A9K3	TNS	TNS	TCGA-5P-A9K9-01	TCGA-5P-A9K9	TNS	TNS	TCGA-5P-A9K9-01	TCGA-5P-A9K9	TNS	TNS
TCGA-5P-A9K4-01	TCGA-5P-A9K4	TNS	TNS	TCGA-5P-A9KA-01	TCGA-5P-A9KA	TNS	TNS	TCGA-5P-A9KA-01	TCGA-5P-A9KA	TNS	TNS
TCGA-5P-A9K6-01	TCGA-5P-A9K6	TNS	TNS	TCGA-5P-A9KC-01	TCGA-5P-A9KC	TNS	TNS	TCGA-5P-A9KC-01	TCGA-5P-A9KC	TNS	TNS
TCGA-5P-A9K8-01	TCGA-5P-A9K8	TNS	TNS	TCGA-5P-A9KE-01	TCGA-5P-A9KE	TNS	TNS	TCGA-5P-A9KE-01	TCGA-5P-A9KE	TNS	TNS
TCGA-5P-A9K9-01	TCGA-5P-A9K9	TNS	TNS	TCGA-5P-A9KF-01	TCGA-5P-A9KF	TNS	TNS	TCGA-5P-A9KF-01	TCGA-5P-A9KF	TNS	TNS
TCGA-5P-A9KA-01	TCGA-5P-A9KA	TNS	TNS	TCGA-5P-A9KH-01	TCGA-5P-A9KH	TNS	TNS	TCGA-5P-A9KH-01	TCGA-5P-A9KH	TNS	TNS
TCGA-5P-A9KC-01	TCGA-5P-A9KC	TNS	TNS	TCGA-A4-7286-01	TCGA-A4-7286	TNS	TNS	TCGA-A4-7286-01	TCGA-A4-7286	TNS	TNS
TCGA-5P-A9KE-01	TCGA-5P-A9KE	TNS	TNS	TCGA-A4-7288-01	TCGA-A4-7288	TNS	TNS	TCGA-A4-7288-01	TCGA-A4-7288	TNS	TNS
TCGA-5P-A9KF-01	TCGA-5P-A9KF	TNS	TNS	TCGA-A4-7732-01	TCGA-A4-7732	TNS	TNS	TCGA-A4-7732-01	TCGA-A4-7732	TNS	TNS
TCGA-5P-A9KH-01	TCGA-5P-A9KH	TNS	TNS	TCGA-AL-3467-01	TCGA-AL-3467	TNS	TNS	TCGA-AL-3467-01	TCGA-AL-3467	TNS	TNS
TCGA-A4-7286-01	TCGA-A4-7286	TNS	TNS	TCGA-AL-3472-01	TCGA-AL-3472	TNS	TNS	TCGA-AL-3472-01	TCGA-AL-3472	TNS	TNS
TCGA-A4-7288-01	TCGA-A4-7288	TNS	TNS	TCGA-B9-4116-01	TCGA-B9-4116	TNS	TNS	TCGA-B9-4116-01	TCGA-B9-4116	TNS	TNS
TCGA-A4-7732-01	TCGA-A4-7732	TNS	TNS	TCGA-B9-4117-01	TCGA-B9-4117	TNS	TNS	TCGA-B9-4117-01	TCGA-B9-4117	TNS	TNS
TCGA-AL-3467-01	TCGA-AL-3467	TNS	TNS	TCGA-B9-4617-01	TCGA-B9-4617	TNS	TNS	TCGA-B9-4617-01	TCGA-B9-4617	TNS	TNS
TCGA-AL-3472-01	TCGA-AL-3472	TNS	TNS	TCGA-B9-5156-01	TCGA-B9-5156	TNS	TNS	TCGA-B9-5156-01	TCGA-B9-5156	TNS	TNS
TCGA-B9-4114-01	TCGA-B9-4114	TNS	TNS	TCGA-HE-A5NJ-01	TCGA-HE-A5NJ	TNS	TNS	TCGA-HE-A5NJ-01	TCGA-HE-A5NJ	TNS	TNS
TCGA-B9-4116-01	TCGA-B9-4116	TNS	TNS	TCGA-HE-A5NK-01	TCGA-HE-A5NK	TNS	TNS	TCGA-HE-A5NK-01	TCGA-HE-A5NK	TNS	TNS
TCGA-B9-4117-01	TCGA-B9-4117	TNS	TNS	TCGA-IA-A83S-01	TCGA-IA-A83S	TNS	TNS	TCGA-IA-A83S-01	TCGA-IA-A83S	TNS	TNS
TCGA-B9-4617-01	TCGA-B9-4617	TNS	TNS	TCGA-IA-A83T-01	TCGA-IA-A83T	TNS	TNS	TCGA-IA-A83T-01	TCGA-IA-A83T	TNS	TNS
TCGA-B9-5156-01	TCGA-B9-5156	TNS	TNS
TCGA-HE-A5NJ-01	TCGA-HE-A5NJ	TNS	TNS
TCGA-HE-A5NK-01	TCGA-HE-A5NK	TNS	TNS
TCGA-IA-A83S-01	TCGA-IA-A83S	TNS	TNS
TCGA-IA-A83T-01	TCGA-IA-A83T	TNS	TNS

## Sheet: LIHC
Step 1 (Differential analysis )								Step 2 (Correlation analysis)				Step 3 (Confirm correlation result)
miRNA sequencing				RNA sequencing				RNA sequencing and miRNA sequencing				Paired samples
Samples	Patients	Stages	Groups	Samples	Patients	Stages	Groups	Samples	Patients	Stages	Groups	Samples	Patients	Stages	Groups
TCGA-BC-A10Q-11	TCGA-BC-A10Q	HC	HC	TCGA-BC-A10Q-11	TCGA-BC-A10Q	HC	HC	TCGA-BC-A10Q-11	TCGA-BC-A10Q	HC	HC	TCGA-BC-A10Q-11	TCGA-BC-A10Q	HC	HC
TCGA-BC-A10R-11	TCGA-BC-A10R	HC	HC	TCGA-BC-A10R-11	TCGA-BC-A10R	HC	HC	TCGA-BC-A10R-11	TCGA-BC-A10R	HC	HC	TCGA-BC-A10Q-01	TCGA-BC-A10Q	TNS	TNS
TCGA-BC-A10T-11	TCGA-BC-A10T	HC	HC	TCGA-BC-A10T-11	TCGA-BC-A10T	HC	HC	TCGA-BC-A10T-11	TCGA-BC-A10T	HC	HC	TCGA-BC-A10R-11	TCGA-BC-A10R	HC	HC
TCGA-BC-A10U-11	TCGA-BC-A10U	HC	HC	TCGA-BC-A10U-11	TCGA-BC-A10U	HC	HC	TCGA-BC-A10U-11	TCGA-BC-A10U	HC	HC	TCGA-BC-A10R-01	TCGA-BC-A10R	TNS	TNS
TCGA-BC-A10W-11	TCGA-BC-A10W	HC	HC	TCGA-BC-A10W-11	TCGA-BC-A10W	HC	HC	TCGA-BC-A10W-11	TCGA-BC-A10W	HC	HC	TCGA-BC-A10T-11	TCGA-BC-A10T	HC	HC
TCGA-BC-A10X-11	TCGA-BC-A10X	HC	HC	TCGA-BC-A10X-11	TCGA-BC-A10X	HC	HC	TCGA-BC-A10X-11	TCGA-BC-A10X	HC	HC	TCGA-BC-A10T-01	TCGA-BC-A10T	TNS	TNS
TCGA-BC-A10Y-11	TCGA-BC-A10Y	HC	HC	TCGA-BC-A10Y-11	TCGA-BC-A10Y	HC	HC	TCGA-BC-A10Y-11	TCGA-BC-A10Y	HC	HC	TCGA-BC-A10U-11	TCGA-BC-A10U	HC	HC
TCGA-BC-A10Z-11	TCGA-BC-A10Z	HC	HC	TCGA-BC-A10Z-11	TCGA-BC-A10Z	HC	HC	TCGA-BC-A10Z-11	TCGA-BC-A10Z	HC	HC	TCGA-BC-A10U-01	TCGA-BC-A10U	TNS	TNS
TCGA-BC-A110-11	TCGA-BC-A110	HC	HC	TCGA-BC-A110-11	TCGA-BC-A110	HC	HC	TCGA-BC-A110-11	TCGA-BC-A110	HC	HC	TCGA-BC-A10W-11	TCGA-BC-A10W	HC	HC
TCGA-BC-A216-11	TCGA-BC-A216	HC	HC	TCGA-BC-A216-11	TCGA-BC-A216	HC	HC	TCGA-BC-A216-11	TCGA-BC-A216	HC	HC	TCGA-BC-A10W-01	TCGA-BC-A10W	TNS	TNS
TCGA-BD-A2L6-11	TCGA-BD-A2L6	HC	HC	TCGA-BD-A2L6-11	TCGA-BD-A2L6	HC	HC	TCGA-BD-A2L6-11	TCGA-BD-A2L6	HC	HC	TCGA-BC-A10X-11	TCGA-BC-A10X	HC	HC
TCGA-BD-A3EP-11	TCGA-BD-A3EP	HC	HC	TCGA-BD-A3EP-11	TCGA-BD-A3EP	HC	HC	TCGA-BD-A3EP-11	TCGA-BD-A3EP	HC	HC	TCGA-BC-A10X-01	TCGA-BC-A10X	III	Advanced
TCGA-DD-A113-11	TCGA-DD-A113	HC	HC	TCGA-DD-A113-11	TCGA-DD-A113	HC	HC	TCGA-DD-A113-11	TCGA-DD-A113	HC	HC	TCGA-BC-A10Y-11	TCGA-BC-A10Y	HC	HC
TCGA-DD-A114-11	TCGA-DD-A114	HC	HC	TCGA-DD-A114-11	TCGA-DD-A114	HC	HC	TCGA-DD-A114-11	TCGA-DD-A114	HC	HC	TCGA-BC-A10Y-01	TCGA-BC-A10Y	TNS	TNS
TCGA-DD-A116-11	TCGA-DD-A116	HC	HC	TCGA-DD-A116-11	TCGA-DD-A116	HC	HC	TCGA-DD-A116-11	TCGA-DD-A116	HC	HC	TCGA-BC-A10Z-11	TCGA-BC-A10Z	HC	HC
TCGA-DD-A118-11	TCGA-DD-A118	HC	HC	TCGA-DD-A118-11	TCGA-DD-A118	HC	HC	TCGA-DD-A118-11	TCGA-DD-A118	HC	HC	TCGA-BC-A10Z-01	TCGA-BC-A10Z	I	Early
TCGA-DD-A119-11	TCGA-DD-A119	HC	HC	TCGA-DD-A119-11	TCGA-DD-A119	HC	HC	TCGA-DD-A119-11	TCGA-DD-A119	HC	HC	TCGA-BC-A110-11	TCGA-BC-A110	HC	HC
TCGA-DD-A11A-11	TCGA-DD-A11A	HC	HC	TCGA-DD-A11A-11	TCGA-DD-A11A	HC	HC	TCGA-DD-A11A-11	TCGA-DD-A11A	HC	HC	TCGA-BC-A110-01	TCGA-BC-A110	TNS	TNS
TCGA-DD-A11B-11	TCGA-DD-A11B	HC	HC	TCGA-DD-A11B-11	TCGA-DD-A11B	HC	HC	TCGA-DD-A11B-11	TCGA-DD-A11B	HC	HC	TCGA-BC-A216-11	TCGA-BC-A216	HC	HC
TCGA-DD-A11C-11	TCGA-DD-A11C	HC	HC	TCGA-DD-A11C-11	TCGA-DD-A11C	HC	HC	TCGA-DD-A11C-11	TCGA-DD-A11C	HC	HC	TCGA-BC-A216-01	TCGA-BC-A216	III	Advanced
TCGA-DD-A11D-11	TCGA-DD-A11D	HC	HC	TCGA-DD-A11D-11	TCGA-DD-A11D	HC	HC	TCGA-DD-A11D-11	TCGA-DD-A11D	HC	HC	TCGA-BD-A2L6-11	TCGA-BD-A2L6	HC	HC
TCGA-DD-A1EB-11	TCGA-DD-A1EB	HC	HC	TCGA-DD-A1EB-11	TCGA-DD-A1EB	HC	HC	TCGA-DD-A1EB-11	TCGA-DD-A1EB	HC	HC	TCGA-BD-A2L6-01	TCGA-BD-A2L6	TNS	TNS
TCGA-DD-A1EC-11	TCGA-DD-A1EC	HC	HC	TCGA-DD-A1EC-11	TCGA-DD-A1EC	HC	HC	TCGA-DD-A1EC-11	TCGA-DD-A1EC	HC	HC	TCGA-BD-A3EP-11	TCGA-BD-A3EP	HC	HC
TCGA-DD-A1EE-11	TCGA-DD-A1EE	HC	HC	TCGA-DD-A1EE-11	TCGA-DD-A1EE	HC	HC	TCGA-DD-A1EE-11	TCGA-DD-A1EE	HC	HC	TCGA-BD-A3EP-01	TCGA-BD-A3EP	I	Early
TCGA-DD-A1EG-11	TCGA-DD-A1EG	HC	HC	TCGA-DD-A1EG-11	TCGA-DD-A1EG	HC	HC	TCGA-DD-A1EG-11	TCGA-DD-A1EG	HC	HC	TCGA-DD-A113-11	TCGA-DD-A113	HC	HC
TCGA-DD-A1EH-11	TCGA-DD-A1EH	HC	HC	TCGA-DD-A1EH-11	TCGA-DD-A1EH	HC	HC	TCGA-DD-A1EH-11	TCGA-DD-A1EH	HC	HC	TCGA-DD-A113-01	TCGA-DD-A113	II	Early
TCGA-DD-A1EI-11	TCGA-DD-A1EI	HC	HC	TCGA-DD-A1EI-11	TCGA-DD-A1EI	HC	HC	TCGA-DD-A1EI-11	TCGA-DD-A1EI	HC	HC	TCGA-DD-A114-11	TCGA-DD-A114	HC	HC
TCGA-DD-A1EJ-11	TCGA-DD-A1EJ	HC	HC	TCGA-DD-A1EJ-11	TCGA-DD-A1EJ	HC	HC	TCGA-DD-A1EJ-11	TCGA-DD-A1EJ	HC	HC	TCGA-DD-A114-01	TCGA-DD-A114	II	Early
TCGA-DD-A1EL-11	TCGA-DD-A1EL	HC	HC	TCGA-DD-A1EL-11	TCGA-DD-A1EL	HC	HC	TCGA-DD-A1EL-11	TCGA-DD-A1EL	HC	HC	TCGA-DD-A116-11	TCGA-DD-A116	HC	HC
TCGA-DD-A39V-11	TCGA-DD-A39V	HC	HC	TCGA-DD-A39V-11	TCGA-DD-A39V	HC	HC	TCGA-DD-A39V-11	TCGA-DD-A39V	HC	HC	TCGA-DD-A116-01	TCGA-DD-A116	III	Advanced
[truncated: 392 more rows]

## Sheet: LUAD
Step 1 (Differential analysis )								Step 2 (Correlation analysis)				Step 3 (Confirm correlation result)
[truncated: 574 more rows]

[truncated: 3 more sheets: LUSC, STAD, THCA]
