# Supplementary material for: Integrated Analysis of MicroRNA (miRNA) and mRNA Profiles Reveals Reduced Correlation between MicroRNA and Target Gene in Cancer
Source: Biomed Res Int. 2018 Dec 6;2018:1972606. doi: 10.1155/2018/1972606 (PMC6304515; doi:10.1155/2018/1972606)
Supplement: Supplementary Materials — Figure S1. Expression density distribution of mRNAs and miRNAs before and after filtering. Figure S2. Distribution of the PCC values of critical miRNA-target gene pairs in healthy controls and 4 clinically staged tumors. Figure S3: Simple correlations coefficients (Cor) and partial correlation coefficients (Pcor) of critical pairs in normal and tumor samples of LIHC. Figure S4: Simple correlations coefficients (Cor) and partial correlation coefficients (Pcor) of critical pairs in normal and tumor samples of LUAD. Figure S5: Simple correlations coefficients (Cor) and partial correlation coefficients (Pcor) of critical pairs in tumor samples of LIHC. Figure S6: Simple correlations coefficients (Pearson correlation coefficient) and partial correlation coefficients (given CNAs effects) of critical pairs in cancer samples of LUAD. Table S1: Sample sizes for each cancer type. Table S2. Sample clinical and grouping information for each cancer type. Table S3. List of DEMs for each cancer type. Table S4. List of DEGs for each cancer type. Table S5. Frequency of DEMs and DEGs in 11 cancer types. Table S6. List of critical miRNA-target gene pairs for each cancer type. Table S7: Interactional references and gene functional references for some critical miRNA-target pairs. Table S8. Frequency of critical miRNA-target pairs in 11 cancer types. Table S9. List of the significantly GO annotation terms (p < 0.05) for the critical target genes in each cancer type. Table S10. List of the significantly KEGG pathway terms (p < 0.05) for the critical target genes in each cancer type. Table S11. Partial and simple correlation coefficients for each critical pair in normal and tumor samples of LUAD and LIHC when controlling methylation or CNAs effect. [file 1972606.f1.zip › 1972606.f1/Table S3_BMRI_2598512.xlsx]

## Sheet: BLCA
DEMs	baseMean	log2FoldChange.early	lfcSE.early	stat.early	pvalue.early	padj.early	log2FoldChange.advanced	lfcSE.advanced	stat.advanced	pvalue.advanced	padj.advanced	Mean.HC	Mean.Early	Mean.Advanced
let-7c	5250.48	-3.41098	0.377319	-9.04004	1.56612e-19	6.36661e-18	-2.31753	0.364976	-6.34984	2.15545e-10	2.67168e-09	25969.2	5209.58	2441.43
miR-1-1	213.539	-4.7415	0.469938	-10.0896	6.13926e-24	6.378e-22	-3.82844	0.454405	-8.42517	3.60225e-17	1.60386e-15	2112.42	148.627	78.8624
miR-1-2	225.798	-4.7851	0.467268	-10.2406	1.30428e-24	1.52438e-22	-3.88371	0.45183	-8.59551	8.28948e-18	3.87533e-16	2279.65	154.369	82.5741
miR-100	16438.4	-2.63664	0.327866	-8.04181	8.8519e-16	1.92477e-14	-1.88831	0.317144	-5.9541	2.61514e-09	2.71684e-08	61428.4	16593.2	9877.78
miR-105-1	251.162	3.92758	0.749775	5.23835	1.62022e-07	1.09776e-06	4.30021	0.725874	5.92418	3.13851e-09	3.22473e-08	13.853	277.893	214.622
miR-105-2	251.967	3.7836	0.739808	5.11429	3.14919e-07	2.03068e-06	4.15435	0.716178	5.80072	6.60325e-09	6.36499e-08	15.4024	278.231	215.163
miR-106a	74.4386	1.67741	0.316054	5.30736	1.11222e-07	7.64651e-07	1.37916	0.306359	4.50179	6.73838e-06	3.44283e-05	26.9755	70.6775	86.9337
miR-10b	164511	-1.1285	0.267952	-4.21156	2.53611e-05	0.000111327	-1.30277	0.259191	-5.02628	5.00079e-07	3.20256e-06	367988	149164	168315
miR-1247	298.077	-3.35344	0.499743	-6.71033	1.94179e-11	2.48709e-10	-2.63917	0.483337	-5.46031	4.75316e-08	3.80231e-07	1677.91	269.233	164.085
miR-1251	4.92084	3.1765	0.95847	3.31414	0.000919264	0.00280726	3.03455	0.932534	3.25409	0.00113757	0.00354543	0.441757	8.57533	5.53367
miR-1258	2.01049	-3.73148	0.571248	-6.53215	6.48315e-11	7.48364e-10	-2.80203	0.543139	-5.15895	2.48336e-07	1.64677e-06	12.6547	1.80796	0.937375
miR-125b-1	1057.37	-2.49883	0.30004	-8.32832	8.19965e-17	2.32037e-15	-1.66311	0.290202	-5.73086	9.99238e-09	9.43725e-08	3501.47	1105.54	619.417
miR-125b-2	1107.05	-2.52427	0.301257	-8.37911	5.33279e-17	1.55818e-15	-1.65484	0.29138	-5.67932	1.35232e-08	1.22759e-07	3663.67	1163.42	636.8
miR-1262	4.27622	-1.57197	0.312603	-5.02867	4.93901e-07	3.05826e-06	-1.46232	0.300388	-4.86811	1.1267e-06	6.79656e-06	11.2908	3.96857	3.86671
miR-127	3877.61	-1.48226	0.291966	-5.07684	3.83771e-07	2.44099e-06	-1.12732	0.282416	-3.99171	6.55983e-05	0.000278793	8629.04	3950.11	3088.48
miR-1270	13.3941	2.04581	0.46959	4.35657	1.32114e-05	6.20734e-05	1.8307	0.457097	4.00506	6.20007e-05	0.00026592	3.71759	13.1693	15.2626
miR-1277	6.71728	2.41164	0.403389	5.97845	2.25274e-09	2.08546e-08	2.14238	0.396848	5.39848	6.72064e-08	5.15066e-07	1.36762	6.51175	7.93662
miR-1283-2	7.91813	3.87103	0.99745	3.88092	0.000104061	0.000397131	5.2683	0.970285	5.42964	5.64679e-08	4.47436e-07	0	17.1336	7.38453
miR-1293	8.09445	3.28812	0.665174	4.94325	7.6829e-07	4.63452e-06	2.60525	0.649405	4.01175	6.02694e-05	0.000260888	0.944802	9.84945	18.9378
miR-1298	1.96518	-5.03714	0.767654	-6.56174	5.31852e-11	6.37541e-10	-4.89134	0.736168	-6.64432	3.04612e-11	4.12772e-10	26.0849	0.863116	0.805404
miR-1301	52.4176	1.65254	0.238589	6.9263	4.32001e-12	5.77029e-11	1.45643	0.231879	6.28097	3.3647e-10	4.03333e-09	18.6669	51.3171	58.7506
miR-1304	8.87826	1.47897	0.484646	3.05165	0.00227584	0.00624021	1.52099	0.471479	3.22601	0.00125531	0.0038774	2.87537	9.33276	12.9526
miR-1307	8636.67	1.84367	0.192846	9.56029	1.17425e-21	6.09958e-20	1.56041	0.186552	8.3645	6.03728e-17	2.45428e-15	2811.59	8291.34	10089.9
miR-130b	244.634	2.40725	0.248081	9.7035	2.9132e-22	1.7024e-20	2.18882	0.240424	9.10397	8.70867e-20	8.1426e-18	52.614	239.593	278.768
miR-132	462.789	-1.3512	0.199795	-6.76292	1.35242e-11	1.75627e-10	-1.17301	0.193235	-6.07037	1.27615e-09	1.40377e-08	1027.37	454.752	401.911
miR-1323	8.96696	4.09975	1.00707	4.07096	4.68201e-05	0.000197193	5.16832	0.980003	5.27378	1.33639e-07	9.32482e-07	0.0291674	51.3512	25.297
miR-133a-1	146.34	-4.42683	0.469518	-9.42846	4.16172e-21	1.85296e-19	-3.63912	0.453962	-8.01635	1.0893e-15	3.28547e-14	1327.12	106.459	61.5899
miR-133a-2	128.208	-4.35096	0.4629	-9.39934	5.49049e-21	2.33346e-19	-3.54924	0.447532	-7.9307	2.17917e-15	5.99271e-14	1121.2	95.7169	54.8267
miR-133b	53.4455	-4.66103	0.583537	-7.98755	1.37644e-15	2.85994e-14	-4.03591	0.564018	-7.15565	8.32794e-13	1.55733e-11	558.784	34.0279	22.0095
miR-135b	123.849	3.75571	0.459282	8.17736	2.90119e-16	7.13846e-15	3.44706	0.445502	7.73748	1.01404e-14	2.43109e-13	10.8092	120.122	148.701
miR-137	7.96815	2.27488	0.830699	2.73851	0.00617175	0.0147209	2.10525	0.806684	2.60976	0.00906052	0.0216665	1.72392	8.7608	11.8056
miR-138-1	16.0527	3.0146	0.568979	5.29827	1.16907e-07	7.97871e-07	2.6415	0.554148	4.76678	1.87194e-06	1.08464e-05	2.43753	15.2964	19.7832
miR-138-2	10.9883	2.88518	0.572889	5.03618	4.74904e-07	2.96023e-06	2.49183	0.558755	4.45961	8.21105e-06	4.1276e-05	1.76661	10.4206	13.6407
miR-139	313.678	-3.02748	0.266414	-11.3638	6.33074e-30	1.47981e-27	-2.78123	0.25763	-10.7955	3.61605e-27	8.45251e-25	1782.67	259.184	218.423
miR-140	4136.54	-1.1096	0.154844	-7.16595	7.72512e-13	1.22424e-11	-1.13941	0.149779	-7.60728	2.79928e-14	6.38373e-13	8604.68	3906.23	3987.87
miR-141	10231.6	2.93583	0.297875	9.85589	6.4641e-23	5.03661e-21	2.34436	0.288148	8.13595	4.08731e-16	1.36487e-14	1790.11	9093.37	13701.6
miR-142	6118.26	1.19228	0.321428	3.70931	0.000207828	0.000741676	1.25532	0.310924	4.03739	5.40502e-05	0.000236154	2674.72	6386.16	6113.18
miR-143	1.22006e+06	-4.30715	0.389907	-11.0466	2.27604e-28	3.54683e-26	-3.76697	0.377158	-9.98778	1.72401e-23	2.30279e-21	1.13774e+07	835741	574725
miR-145	15295.3	-2.8807	0.341438	-8.43694	3.25746e-17	9.82492e-16	-2.21271	0.330273	-6.69964	2.08929e-11	3.05232e-10	67950.3	14658.7	9225.89
miR-147b	8.11204	3.9565	0.640383	6.17833	6.47836e-10	6.62794e-09	4.28982	0.62844	6.82613	8.72352e-12	1.43096e-10	0.206688	9.11616	7.24798
miR-149	817.785	1.88199	0.32681	5.75868	8.47761e-09	6.89527e-08	1.85989	0.316201	5.882	4.05339e-09	4.03183e-08	229.927	837.14	850.158
miR-150	2586.35	-1.23555	0.382682	-3.22866	0.00124372	0.00360161	-1.0944	0.370168	-2.95649	0.00311165	0.00842052	5412.68	2534.65	2298.44
miR-17	4851.78	1.76615	0.179954	9.81445	9.75679e-23	6.51614e-21	1.54019	0.174091	8.84704	8.98692e-19	5.25173e-17	1627.55	4736.99	5540.02
miR-181b-1	794.155	1.20064	0.215564	5.56977	2.55076e-08	1.90216e-07	1.29603	0.208582	6.2135	5.18174e-10	6.05615e-09	338.051	832.291	778.91
miR-181b-2	772.543	1.17877	0.218493	5.39498	6.85294e-08	4.81767e-07	1.25103	0.211415	5.9174	3.27067e-09	3.32399e-08	337.373	805.12	765.663
miR-182	101916	2.34536	0.291206	8.05397	8.01503e-16	1.82782e-14	2.18203	0.281685	7.74634	9.4579e-15	2.32714e-13	22369.3	101511	113679
miR-183	56652.5	2.8804	0.305136	9.43974	3.73711e-21	1.7471e-19	2.88715	0.295162	9.78157	1.35092e-22	1.57889e-20	7967.34	58940.7	58666
miR-185	416.573	1.17982	0.156253	7.55072	4.3287e-14	8.09467e-13	1.12549	0.151305	7.43857	1.0178e-13	2.06878e-12	193.416	421.434	437.853
miR-187	558.206	1.46968	0.475266	3.09234	0.00198585	0.00550969	1.13288	0.459777	2.46398	0.0137403	0.0308826	240.467	527.679	666.371
miR-188	18.4317	1.75595	0.285124	6.15854	7.34204e-10	7.30298e-09	1.48777	0.278276	5.34639	8.97268e-08	6.55426e-07	6.63671	17.7702	21.3254
miR-18a	141.443	2.94444	0.262261	11.2271	3.00038e-29	5.61072e-27	2.6868	0.254719	10.5481	5.1827e-26	9.69165e-24	20.3658	138.275	165.185
miR-191	3488.66	1.46079	0.20753	7.03894	1.93701e-12	2.7441e-11	1.08107	0.200763	5.38482	7.25153e-08	5.42414e-07	1537.16	3253.3	4232.71
miR-1910	6.22006	3.22442	0.553953	5.82075	5.85845e-09	5.02537e-08	2.75658	0.54386	5.06855	4.00851e-07	2.62095e-06	0.894847	5.76456	7.81174
miR-1912	0.417633	-4.89485	1.70631	-2.86867	0.00412199	0.0106172	-4.90441	1.64683	-2.97808	0.00290059	0.00800016	7.10974	0.105602	0.110727
miR-192	1760.67	1.89604	0.26344	7.19723	6.14475e-13	9.90576e-12	1.64032	0.254868	6.43595	1.227e-10	1.57156e-09	546.898	3294.38	2035.99
miR-195	144.612	-3.03083	0.255549	-11.8601	1.90824e-32	8.92102e-30	-2.67471	0.247011	-10.8283	2.52845e-27	7.88034e-25	791.574	123.684	96.5773
miR-19a	176.617	2.26433	0.226715	9.98753	1.72828e-23	1.61595e-21	1.9886	0.219891	9.04356	1.51644e-19	1.06407e-17	42.2418	171.216	207.141
miR-19b-1	456.073	1.45422	0.180179	8.07096	6.97484e-16	1.67217e-14	1.15705	0.174446	6.63271	3.29586e-11	4.40233e-10	194.256	435.707	535.153
miR-19b-2	414.007	1.46915	0.182354	8.05658	7.84603e-16	1.82782e-14	1.18704	0.176566	6.72291	1.78129e-11	2.64367e-10	173.263	397.049	482.599
miR-200a	7157.17	2.4892	0.333733	7.45867	8.74035e-14	1.54193e-12	1.96403	0.322833	6.08375	1.17406e-09	1.30684e-08	1660.94	6481.74	9327.88
miR-200b	6578.13	2.17603	0.336918	6.45863	1.05656e-10	1.20474e-09	1.54448	0.325911	4.73896	2.14813e-06	1.2247e-05	1971.92	5753.96	8914.2
miR-200c	69861.2	1.89227	0.298554	6.33813	2.32571e-10	2.47107e-09	1.30453	0.288793	4.51719	6.26653e-06	3.21934e-05	24924.2	61564.9	92525.3
miR-202	2.65525	-1.99091	0.49886	-3.99093	6.58152e-05	0.000266395	-1.80168	0.479783	-3.75519	0.00017321	0.000650405	8.90842	2.47624	2.17065
miR-203a	139444	1.20344	0.505915	2.37874	0.0173718	0.0371685	1.15943	0.489373	2.36921	0.017826	0.0384927	63138.2	141030	145398
miR-203b	258.302	2.43804	0.609638	3.99915	6.35702e-05	0.000258427	2.74523	0.589937	4.65343	3.26461e-06	1.78503e-05	42.1505	282.065	227.979
miR-204	45.2394	-3.28888	0.562134	-5.85071	4.8948e-09	4.3587e-08	-1.36413	0.5429	-2.51267	0.0119822	0.0273599	139.382	53.9891	14.2595
miR-205	42136.6	2.38909	0.388046	6.15671	7.42715e-10	7.30988e-09	2.02477	0.37536	5.39421	6.88238e-08	5.18954e-07	9783.38	39813.1	51250.2
miR-20a	2108.96	2.1488	0.224905	9.55423	1.24509e-21	6.12713e-20	1.87783	0.217601	8.62971	6.15099e-18	3.02693e-16	554.487	2041.82	2463.63
miR-20b	159.823	1.81251	0.430522	4.21003	2.55342e-05	0.000111563	1.65175	0.416712	3.96377	7.37749e-05	0.000309268	50.2546	157.74	176.376
miR-21	1.32359e+06	1.3078	0.185734	7.04124	1.90539e-12	2.74083e-11	1.62651	0.179661	9.05322	1.3881e-19	1.06407e-17	473325	1.46147e+06	1.17178e+06
miR-210	4404.21	5.21252	0.385678	13.5152	1.27161e-41	1.18896e-38	4.73371	0.373184	12.6846	7.1938e-37	6.7262e-34	152.226	4058.55	5655.96
miR-215	27.2699	2.15994	0.460772	4.68766	2.7635e-06	1.54723e-05	1.5826	0.447269	3.53837	0.000402609	0.00139422	8.04882	166.237	139.162
miR-218-1	103.354	-1.61205	0.27975	-5.76249	8.2884e-09	6.8581e-08	-1.46587	0.2705	-5.41909	5.99034e-08	4.66747e-07	272.831	98.7305	89.2399
miR-218-2	102.395	-1.58787	0.280271	-5.66546	1.46628e-08	1.15207e-07	-1.46926	0.27101	-5.42143	5.91254e-08	4.64557e-07	269.521	97.26	89.6141
miR-224	623.188	2.5245	0.436653	5.78148	7.40479e-09	6.23737e-08	2.52045	0.422501	5.96555	2.43816e-09	2.59054e-08	112.94	646.438	648.208
miR-23b	5814.35	-1.4772	0.197729	-7.47083	7.96885e-14	1.43286e-12	-1.50755	0.191262	-7.88213	3.21855e-15	8.37392e-14	15165.1	5333.52	5447.07
miR-23c	1.24522	-2.34315	0.67331	-3.48005	0.000501314	0.0016332	-2.43578	0.647573	-3.7614	0.000168964	0.000637022	5.19898	1.06417	1.05025
miR-26a-1	4216.3	-1.26763	0.154947	-8.18103	2.81428e-16	7.11176e-15	-1.25138	0.149878	-8.3493	6.8671e-17	2.5683e-15	9491.98	3985.99	3941.62
miR-26a-2	4237.96	-1.27745	0.155001	-8.24159	1.69935e-16	4.53968e-15	-1.25961	0.14993	-8.40132	4.41485e-17	1.87631e-15	9591.48	4004.88	3955.92
miR-27b	9395.41	-1.09701	0.19317	-5.679	1.35484e-08	1.07354e-07	-1.00007	0.186853	-5.35216	8.69091e-08	6.39842e-07	18337.5	9168.02	8572.37
miR-28	22894.5	-1.82308	0.169831	-10.7347	6.99515e-27	9.34353e-25	-1.67041	0.164277	-10.1682	2.74829e-24	4.28275e-22	68415.9	21493.6	19335.2
miR-299	22.501	-1.0926	0.314806	-3.47071	0.000519083	0.00168522	-1.09673	0.304337	-3.60367	0.000313759	0.00111123	45.9369	21.5068	21.4289
miR-29a	30148.8	-1.47079	0.251979	-5.83694	5.31671e-09	4.64591e-08	-1.26232	0.24374	-5.17895	2.23141e-07	1.49026e-06	71027.3	29609.6	25625.7
miR-301a	93.4125	2.30195	0.267982	8.58994	8.70169e-18	2.80555e-16	2.1111	0.260183	8.11391	4.90176e-16	1.58039e-14	21.1107	92.5055	105.523
miR-301b	18.8366	4.16828	0.49049	8.49819	1.92576e-17	6.00194e-16	3.95477	0.481807	8.2082	2.24523e-16	7.77513e-15	1.19994	18.6454	21.6233
miR-3065	207.393	1.40628	0.36137	3.89153	9.96149e-05	0.000383292	1.86713	0.349758	5.33836	9.37887e-08	6.78975e-07	64.6173	235.657	171.302
miR-3074	24.4924	1.47079	0.372042	3.9533	7.70822e-05	0.000309321	1.54252	0.36125	4.26995	1.95513e-05	9.27943e-05	8.63328	25.6749	24.5568
miR-30a	60610.9	-2.12568	0.268974	-7.90293	2.72428e-15	5.30668e-14	-2.17475	0.260179	-8.35865	6.34426e-17	2.47162e-15	234973	52042.1	53842.4
miR-31	569.522	3.14207	0.490173	6.41013	1.454e-10	1.5808e-09	2.43038	0.474298	5.12416	2.98865e-07	1.96788e-06	90.2201	488.38	799.693
miR-3199-2	4.33061	-2.65799	0.319281	-8.32493	8.43772e-17	2.32037e-15	-2.50891	0.305567	-8.21069	2.1992e-16	7.77513e-15	21.5945	3.64465	3.32153
miR-32	184.396	1.20749	0.195983	6.16121	7.2191e-10	7.25791e-09	1.01333	0.189863	5.33718	9.44029e-08	6.78975e-07	87.8285	178.754	204.564
miR-3200	28.1713	2.93514	0.455594	6.44244	1.1757e-10	1.32443e-09	2.3912	0.443271	5.39444	6.87372e-08	5.18954e-07	4.66907	25.4832	37.155
miR-323b	11.2079	1.20523	0.361118	3.33749	0.000845397	0.00260015	1.3908	0.351455	3.95727	7.58099e-05	0.000312168	4.33194	12.0692	25.4367
miR-324	287.616	1.59157	0.226256	7.03439	2.0014e-12	2.793e-11	1.29208	0.21908	5.89775	3.68496e-09	3.70477e-08	111.387	274.479	337.654
miR-335	746.205	2.24944	0.389562	5.77427	7.72859e-09	6.45199e-08	2.62195	0.376935	6.95597	3.50137e-12	5.95233e-11	135.515	834.028	644.136
miR-337	155.43	-1.3799	0.305354	-4.51904	6.21211e-06	3.10605e-05	-1.29053	0.295322	-4.36992	1.24294e-05	6.08456e-05	364.341	149.094	139.992
miR-339	296.569	1.88165	0.262816	7.15957	8.09284e-13	1.26113e-11	1.07433	0.254436	4.22241	2.41709e-05	0.000112999	115.792	245.182	428.853
miR-33a	136.179	2.57575	0.296249	8.69457	3.48155e-18	1.16259e-16	2.26448	0.287301	7.88191	3.22418e-15	8.37392e-14	27.1166	130.71	162.296
miR-33b	14.3732	2.86346	0.437638	6.54299	6.02999e-11	7.13676e-10	2.51134	0.42795	5.86831	4.40264e-09	4.33312e-08	2.52425	13.6479	17.5584
miR-340	85.1865	-1.29036	0.185795	-6.94508	3.78255e-12	5.12563e-11	-1.05331	0.179554	-5.86625	4.45759e-09	4.34151e-08	179.301	85.2007	72.4248
miR-345	114.503	3.2244	0.331165	9.73653	2.10614e-22	1.31283e-20	2.55927	0.321445	7.96177	1.69589e-15	4.95519e-14	16.7087	99.5263	157.863
miR-34b	11.6749	1.81408	0.448744	4.04257	5.28686e-05	0.000218726	1.89807	0.437033	4.34308	1.40501e-05	6.84213e-05	3.0625	12.2685	11.675
miR-34c	65.4348	1.62027	0.372214	4.35305	1.34256e-05	6.27646e-05	1.69419	0.360693	4.69705	2.63943e-06	1.48667e-05	20.791	68.2706	64.9671
miR-3613	65.5072	1.47668	0.212586	6.94626	3.75091e-12	5.12563e-11	1.28438	0.206488	6.22009	4.96883e-10	5.88083e-09	25.7883	64.3693	73.6309
miR-3614	35.4012	2.22567	0.36717	6.06168	1.34706e-09	1.28613e-08	1.11888	0.356602	3.13761	0.00170334	0.00503993	12.0186	26.5051	56.8484
miR-3651	8.11493	2.75375	0.533098	5.16557	2.39712e-07	1.56734e-06	2.72661	0.521818	5.22521	1.73958e-07	1.17015e-06	1.04403	8.42773	8.4881
miR-365a	367.884	-1.82243	0.20601	-8.8463	9.04725e-19	3.25353e-17	-1.31171	0.199206	-6.58468	4.55861e-11	5.91986e-10	940.946	378.724	265.661
miR-365b	363.83	-1.84343	0.20629	-8.93611	4.03095e-19	1.50758e-17	-1.32686	0.199475	-6.65175	2.89624e-11	3.99096e-10	940.256	374.49	261.623
miR-374b	350.619	-1.33838	0.168313	-7.95178	1.83856e-15	3.73707e-14	-1.29248	0.162776	-7.94027	2.01741e-15	5.716e-14	815.155	332.461	322.2
miR-377	23.9054	-1.47694	0.332111	-4.44713	8.70238e-06	4.19419e-05	-1.09754	0.320792	-3.42134	0.000623136	0.0020958	51.8867	24.5791	36.572
miR-378a	5169.78	-1.07795	0.265112	-4.06602	4.78224e-05	0.000200511	-1.7253	0.256444	-6.72776	1.72297e-11	2.59835e-10	13375.1	4044.92	6335.49
miR-378c	44.855	-1.2046	0.260977	-4.61573	3.9171e-06	2.12709e-05	-1.67922	0.252459	-6.65143	2.90251e-11	3.99096e-10	118.243	36.8013	51.2757
miR-378d-2	2.08276	-1.39007	0.394394	-3.52457	0.000424169	0.00140141	-1.83357	0.380997	-4.81256	1.49011e-06	8.76259e-06	6.14494	1.69682	2.28589
miR-379	3847.15	-2.0282	0.283529	-7.1534	8.46552e-13	1.29758e-11	-1.33049	0.274252	-4.85133	1.22636e-06	7.3503e-06	10241	4072.12	3607.59
miR-383	14.4292	-3.19668	0.691612	-4.62207	3.79931e-06	2.0774e-05	-3.22519	0.668516	-4.8244	1.40425e-06	8.30999e-06	98.1363	10.5012	10.6883
miR-3913-1	13.8606	1.93838	0.371369	5.21955	1.79356e-07	1.18935e-06	1.61409	0.362159	4.45687	8.31659e-06	4.1583e-05	4.16682	13.2207	16.5458
miR-3913-2	13.5904	1.45084	0.363878	3.98717	6.68667e-05	0.000269484	1.18053	0.354124	3.33367	0.000857076	0.00280198	5.4943	13.0841	15.7555
miR-3934	13.4545	1.6933	0.304062	5.56891	2.56334e-08	1.90216e-07	1.46935	0.297074	4.94607	7.57261e-07	4.78405e-06	4.81801	13.1728	15.2814
miR-411	48.112	-1.29652	0.323396	-4.00908	6.09547e-05	0.000248876	-1.23732	0.312698	-3.95693	7.59192e-05	0.000312168	109.068	46.0898	44.0697
miR-425	1835.74	1.97425	0.219728	8.98499	2.58767e-19	1.00811e-17	1.84578	0.212596	8.68211	3.88494e-18	2.13672e-16	510.801	1840.31	2011.45
miR-429	1514.36	3.08791	0.353494	8.73539	2.42811e-18	8.40844e-17	2.51311	0.342016	7.34794	2.01279e-13	4.00416e-12	237.054	1356.69	2020.76
miR-431	57.8889	-1.06594	0.312324	-3.41294	0.000642666	0.00202321	-1.02036	0.302038	-3.37827	0.000729447	0.00241001	113.31	56.0844	239.43
miR-432	38.8116	-1.38581	0.305012	-4.54344	5.53423e-06	2.8276e-05	-1.20046	0.294817	-4.07189	4.66332e-05	0.000207629	87.7725	38.1536	85.3881
miR-4326	36.1645	1.21524	0.375087	3.23989	0.00119576	0.00349386	1.1277	0.363577	3.10167	0.00192433	0.00564028	16.2761	36.4536	38.7359
miR-433	5.98669	-1.32735	0.327891	-4.04813	5.1628e-05	0.000214543	-1.0356	0.315722	-3.2801	0.0010377	0.00330016	12.1266	6.10526	13.5678
miR-454	49.0147	1.41551	0.18923	7.48035	7.4126e-14	1.35898e-12	1.26616	0.184172	6.87486	6.20516e-12	1.03604e-10	19.4992	48.6901	53.94
miR-455	891.144	1.88961	0.286747	6.58984	4.40307e-11	5.41694e-10	1.76143	0.277449	6.34869	2.17163e-10	2.67168e-09	263.087	893.218	976.22
miR-4636	8.85217	2.27761	0.528885	4.30644	1.65902e-05	7.60384e-05	2.1063	0.515772	4.08377	4.43103e-05	0.000199184	2.36146	8.7475	9.87588
miR-4652	12.19	2.79025	0.534205	5.22318	1.75879e-07	1.18307e-06	2.97275	0.521695	5.69826	1.2104e-08	1.12052e-07	2.8657	13.0419	11.6117
miR-4668	9.11977	1.3332	0.308418	4.3227	1.54132e-05	7.13433e-05	1.2074	0.301363	4.00648	6.16301e-05	0.000265549	3.48009	9.10294	9.90328
miR-4724	8.60366	3.79417	0.576141	6.58548	4.53408e-11	5.50567e-10	3.14992	0.565257	5.57254	2.51048e-08	2.21443e-07	0.649213	7.58054	11.7988
miR-4728	14.0858	1.55545	0.470739	3.30428	0.000952206	0.00288127	1.44861	0.457288	3.16783	0.00153581	0.0046173	5.07868	14.2024	15.1411
miR-4746	21.3335	1.61349	0.301927	5.34398	9.09257e-08	6.34444e-07	1.61461	0.294036	5.4912	3.99205e-08	3.29553e-07	7.62337	21.9453	21.8769
miR-4786	3.69241	-2.43988	0.330321	-7.38639	1.5087e-13	2.56478e-12	-2.14198	0.31551	-6.78896	1.12942e-11	1.73116e-10	15.3408	3.35155	2.77054
miR-483	401.929	4.53361	0.68568	6.61185	3.79545e-11	4.73166e-10	4.09983	0.663713	6.17711	6.52857e-10	7.53607e-09	21.9752	373.98	505.144
miR-490	77.6723	-3.76941	0.671691	-5.61182	2.00204e-08	1.53435e-07	-2.51746	0.649428	-3.87642	0.000106003	0.000421755	433.767	75.7254	31.75
miR-498	4.29727	3.10305	1.07473	2.88728	0.00388591	0.0100926	3.902	1.04417	3.73694	0.00018627	0.000691121	0.0850356	20.9601	14.1583
miR-503	48.468	2.53713	0.31532	8.04621	8.53966e-16	1.90109e-14	2.24178	0.306743	7.30832	2.70498e-13	5.16154e-12	9.82316	46.9198	57.7537
miR-504	3.34277	-3.21608	0.401885	-8.0025	1.21915e-15	2.5907e-14	-2.96765	0.384353	-7.72116	1.15279e-14	2.69464e-13	21.1317	2.63806	2.26612
miR-512-1	32.9098	4.212	0.857717	4.91071	9.07467e-07	5.40434e-06	5.68872	0.835142	6.81168	9.64631e-12	1.50322e-10	0.589984	156.35	56.8628
miR-512-2	34.2128	5.26619	0.87523	6.01692	1.7777e-09	1.67894e-08	6.37324	0.853575	7.46652	8.23421e-14	1.74977e-12	0.227851	156.971	56.9107
miR-515-1	6.18514	3.04198	1.07289	2.83531	0.00457815	0.0115379	4.49079	1.04209	4.30941	1.63692e-05	7.88926e-05	0.0919042	40.285	17.8595
miR-515-2	6.29534	2.7683	0.995182	2.78171	0.00540741	0.0130983	4.23002	0.966974	4.37449	1.21716e-05	5.98969e-05	0.180089	40.3421	17.9833
miR-516a-1	81.126	4.53783	0.806431	5.62706	1.83311e-08	1.4283e-07	6.07961	0.784148	7.75314	8.96491e-15	2.26546e-13	1.87538	269.069	70.0847
miR-516a-2	68.3983	6.21232	0.847678	7.32863	2.32512e-13	3.81401e-12	7.50321	0.82743	9.06809	1.21116e-19	1.02949e-17	0.308421	234.129	66.0529
miR-516b-1	5.79304	3.02257	1.02138	2.9593	0.00308335	0.00828429	4.02495	0.99273	4.05442	5.02583e-05	0.000220617	0.160704	72.6191	17.7524
miR-517a	17.8541	3.89478	0.866675	4.49393	6.99209e-06	3.47322e-05	4.46962	0.843467	5.29911	1.16371e-07	8.24294e-07	0.639652	155.163	113.645
miR-517b	17.7505	3.88596	0.868025	4.47678	7.5776e-06	3.72898e-05	4.46401	0.844762	5.28433	1.26162e-07	8.8693e-07	0.639652	152.892	113.364
miR-517c	3.49279	3.49725	1.01993	3.42892	0.000605998	0.00192724	3.53456	0.992327	3.56189	0.000368196	0.00128456	0.0291674	40.4355	13.4121
miR-518a-1	14.028	3.00377	1.0342	2.90442	0.00367928	0.00966329	5.27831	1.00473	5.25346	1.49265e-07	1.0338e-06	0.238335	72.257	42.1342
miR-518a-2	9.1443	3.83572	0.944039	4.0631	4.84255e-05	0.000202133	5.11207	0.919148	5.56175	2.67087e-08	2.31228e-07	0.0618214	71.289	56.5528
miR-518b	21.8548	4.24181	0.852157	4.97773	6.43328e-07	3.95732e-06	5.24691	0.830253	6.31966	2.62139e-10	3.18312e-09	0.413365	161.553	143.42
miR-518c	24.9102	4.06552	0.904844	4.49306	7.02073e-06	3.47322e-05	6.00796	0.881267	6.81741	9.26965e-12	1.469e-10	0.264654	171.908	39.895
miR-518e	23.6579	3.61863	0.937372	3.8604	0.0001132	0.00042851	5.51567	0.911718	6.04975	1.45069e-09	1.5772e-08	0.936768	129.506	80.847
miR-518f	20.4132	4.50194	0.983127	4.5792	4.66755e-06	2.42453e-05	6.33538	0.95719	6.61872	3.62319e-11	4.77138e-10	0.0732156	123.964	44.5918
miR-519a-1	80.9295	6.94595	0.847345	8.19732	2.45811e-16	6.38426e-15	7.66759	0.827235	9.26894	1.88002e-20	1.95313e-18	0.209173	301.913	96.7271
miR-519a-2	53.548	4.88871	0.823127	5.93919	2.86433e-09	2.60014e-08	6.46307	0.802221	8.05647	7.85305e-16	2.44753e-14	0.912887	231.416	56.112
miR-519b	2.52073	2.9754	1.12001	2.65659	0.00789344	0.0185436	3.44899	1.08748	3.17155	0.00151627	0.00457327	0	15.3461	17.3999
miR-519c	7.62381	3.61069	1.11836	3.22855	0.00124419	0.00360161	5.24557	1.08626	4.82901	1.37217e-06	8.17183e-06	0	36.2194	8.86551
miR-519d	8.5333	3.86234	0.988589	3.90692	9.34792e-05	0.000365703	4.7479	0.962095	4.93496	8.0166e-07	4.96392e-06	0.494111	58.2805	52.3412
miR-520a	45.932	4.54605	0.874031	5.20125	1.97957e-07	1.30345e-06	6.23904	0.851014	7.3313	2.27923e-13	4.43976e-12	0.695423	280.695	83.5694
miR-520b	22.3608	4.98089	0.887127	5.61463	1.96981e-08	1.52213e-07	6.03735	0.86519	6.97807	2.99272e-12	5.18185e-11	0.164191	110.688	57.2995
miR-520c	6.5126	4.03457	1.03566	3.89567	9.79291e-05	0.000379932	4.63002	1.00759	4.59514	4.32454e-06	2.31054e-05	0.029162	44.2801	37.8735
miR-520d	8.85691	3.66849	1.066	3.44137	0.000578774	0.00186437	5.05777	1.03624	4.88089	1.05607e-06	6.41183e-06	0.0792815	48.8949	40.6641
miR-520f	17.2652	4.56532	0.950276	4.8042	1.55371e-06	9.02307e-06	5.66273	0.925636	6.11767	9.49543e-10	1.06967e-08	0.375175	112.675	56.5906
miR-520g	11.0016	4.29924	1.00943	4.2591	2.05254e-05	9.13871e-05	5.139	0.982452	5.23079	1.68787e-07	1.14359e-06	0.217449	65.4382	41.455
miR-520h	6.5474	3.50385	1.0684	3.27953	0.00103979	0.00307659	4.57315	1.03846	4.40377	1.06387e-05	5.26307e-05	0.188281	36.4591	20.0122
miR-521-1	6.68607	2.90012	1.05318	2.75368	0.00589291	0.0141642	4.76484	1.02259	4.65958	3.16849e-06	1.74267e-05	0.0583294	40.4984	6.96722
miR-522	42.764	4.85857	0.873846	5.55998	2.69803e-08	1.98634e-07	6.46266	0.851573	7.58908	3.22172e-14	7.17217e-13	0.78135	161.703	40.582
miR-524	4.54722	2.93109	1.16748	2.51061	0.0120523	0.0268948	4.47155	1.13248	3.94847	7.86535e-05	0.000319743	0	18.7972	12.5001
miR-525	17.9773	4.59994	0.894676	5.14146	2.72619e-07	1.77013e-06	4.87705	0.871529	5.59597	2.19394e-08	1.97243e-07	0.381761	170.962	62.5277
miR-526b	34.6077	3.682	0.765939	4.80717	1.53079e-06	8.94556e-06	5.2687	0.745816	7.06433	1.61387e-12	2.95877e-11	0.963807	292.223	75.6585
miR-527	14.4567	3.53908	0.969555	3.65021	0.000262026	0.000904037	5.26197	0.943174	5.57901	2.41897e-08	2.15403e-07	0.237415	79.0892	36.0391
miR-548ba	1.15981	-4.1455	0.626746	-6.61432	3.7327e-11	4.71631e-10	-3.38589	0.59457	-5.69469	1.23596e-08	1.13297e-07	9.70527	0.878816	0.52756
miR-550a-1	9.9854	1.33014	0.311428	4.2711	1.94509e-05	8.75881e-05	1.53473	0.304097	5.04685	4.49162e-07	2.91643e-06	3.38733	10.7078	9.48833
miR-551b	32.1218	2.43796	0.578344	4.21541	2.49323e-05	0.000109961	2.22276	0.560914	3.96275	7.4092e-05	0.000309268	6.64662	31.6382	36.7162
miR-5683	17.7979	-3.29236	0.543153	-6.06157	1.34803e-09	1.28613e-08	-1.93028	0.523854	-3.68476	0.000228917	0.000823222	73.1357	19.0984	7.45192
miR-5698	2.41461	-1.93585	0.409087	-4.73213	2.2218e-06	1.25144e-05	-1.45904	0.390852	-3.73296	0.000189243	0.000699375	6.872	2.42116	1.77099
miR-576	51.7677	1.05789	0.191837	5.5145	3.49764e-08	2.55492e-07	1.00811	0.186363	5.40938	6.32432e-08	4.88698e-07	25.7968	52.378	54.2566
miR-577	17.5227	3.54903	0.805334	4.40691	1.04858e-05	5.00214e-05	3.65614	0.783117	4.6687	3.03108e-06	1.67696e-05	1.26996	18.7931	17.4838
miR-584	1576.5	2.04558	0.337207	6.06625	1.30931e-09	1.27521e-08	1.95708	0.326224	5.9992	1.98289e-09	2.13104e-08	412.111	1600.05	1701.25
miR-585	3.78753	-1.48488	0.404255	-3.67314	0.000239592	0.000842174	-1.49579	0.389708	-3.83824	0.000123921	0.000482774	9.7744	3.4719	3.50001
miR-590	100.526	1.76422	0.184484	9.563	1.14395e-21	6.09958e-20	1.60472	0.179271	8.95137	3.51087e-19	2.18844e-17	31.6642	99.9517	111.64
miR-615	8.46818	3.01613	0.65504	4.6045	4.13456e-06	2.21312e-05	3.35048	0.639626	5.2382	1.62154e-07	1.10667e-06	0.956529	9.45198	7.52096
miR-616	8.69522	1.6549	0.347014	4.76897	1.85169e-06	1.04929e-05	1.55507	0.339426	4.58146	4.61742e-06	2.43915e-05	3.00881	8.71466	9.4882
miR-642a	8.27721	2.04655	0.423774	4.82935	1.36979e-06	8.10603e-06	1.23422	0.414106	2.98043	0.00287843	0.00797418	2.47593	6.83483	12.0547
miR-6499	16.1078	2.16022	0.629182	3.43338	0.000596109	0.00190226	2.06384	0.61083	3.37874	0.000728176	0.00241001	3.9109	16.1599	17.206
miR-6507	2.8842	-3.54784	0.610364	-5.81266	6.14864e-09	5.22634e-08	-2.66999	0.584329	-4.56932	4.893e-06	2.5702e-05	16.9558	2.64419	1.4118
miR-651	17.4785	1.79528	0.274573	6.53844	6.21634e-11	7.26534e-10	1.47123	0.268278	5.48399	4.15831e-08	3.38089e-07	5.29477	16.6672	20.9481
miR-653	31.9111	1.31561	0.382368	3.44068	0.000580247	0.00186437	1.45745	0.37081	3.93045	8.47881e-05	0.000341711	12.3017	33.8302	30.7603
miR-654	149.324	-1.83679	0.318964	-5.75861	8.48081e-09	6.89527e-08	-1.52231	0.308446	-4.93543	7.99763e-07	4.96392e-06	420.499	146.518	249.822
miR-671	44.9128	1.8895	0.19223	9.82938	8.41312e-23	6.05097e-21	1.696	0.187649	9.03816	1.59326e-19	1.06407e-17	14.026	44.2527	50.6103
miR-675	1232.58	2.84422	0.594149	4.78704	1.69258e-06	9.70898e-06	2.89668	0.574784	5.03959	4.66519e-07	3.00824e-06	171.746	1279.06	1233.31
miR-6761	1.98982	-2.64482	0.390438	-6.77397	1.25298e-11	1.65006e-10	-2.37909	0.371155	-6.40998	1.45542e-10	1.83894e-09	9.38161	1.66758	1.55729
miR-6854	8.77087	1.37723	0.3121	4.41277	1.02055e-05	4.89341e-05	1.15149	0.305103	3.7741	0.000160584	0.000607879	3.49647	8.58657	9.89799
miR-6892	8.26972	-1.86262	0.263148	-7.07822	1.46015e-12	2.202e-11	-1.76784	0.253125	-6.98408	2.8673e-12	5.06506e-11	26.5473	7.58228	7.16178
miR-7-3	5.49245	1.55632	0.507957	3.06388	0.00218484	0.0060083	1.50658	0.495186	3.04246	0.00234656	0.00670959	2.66475	5.54426	5.77704
miR-708	658.159	1.85917	0.312207	5.95492	2.60198e-09	2.38515e-08	2.06044	0.302104	6.82031	9.08418e-12	1.46443e-10	169.924	710.94	618.449
miR-7156	2.92097	-2.11875	0.390596	-5.42441	5.81452e-08	4.11862e-07	-1.51796	0.372771	-4.07208	4.65943e-05	0.000207629	8.75906	2.9784	2.01257
miR-760	9.34643	1.01197	0.413406	2.44787	0.0143702	0.0315402	1.14156	0.401827	2.84092	0.00449841	0.0115868	4.56545	9.68594	8.8913
miR-767	364.724	4.59454	0.743781	6.17728	6.52161e-10	6.62794e-09	4.80641	0.720101	6.67463	2.47849e-11	3.51119e-10	13.7089	390.553	337.184
miR-7705	11.9462	3.72855	0.469064	7.94892	1.88143e-15	3.74284e-14	3.44045	0.46173	7.45122	9.24837e-14	1.92161e-12	1.02388	11.6193	14.1361
miR-7706	13.9884	1.4461	0.314088	4.60412	4.1422e-06	2.21312e-05	1.05198	0.306127	3.43641	0.000589478	0.00198976	7.16814	12.9716	16.9207
miR-877	18.5848	2.45993	0.330448	7.44425	9.74963e-14	1.68813e-12	2.15786	0.323221	6.67613	2.45335e-11	3.51119e-10	3.71205	17.9122	21.9364
miR-93	39014.6	2.07238	0.209079	9.91195	3.69356e-23	3.13953e-21	1.75083	0.202245	8.65696	4.845e-18	2.51671e-16	11042.6	37167	46446.6
miR-934	286.647	3.10606	0.489262	6.34847	2.17471e-10	2.33719e-09	2.82294	0.473602	5.96057	2.51364e-09	2.64073e-08	38.7176	277.156	337.25
miR-937	15.3134	2.04406	0.376376	5.4309	5.60707e-08	4.00199e-07	2.09914	0.367216	5.71637	1.08822e-08	1.01749e-07	3.77208	16.0593	15.4393
miR-940	28.8715	2.47814	0.3517	7.04616	1.83924e-12	2.68701e-11	2.39375	0.342753	6.98389	2.8711e-12	5.06506e-11	5.53041	29.3294	31.0539
miR-942	38.6481	1.15272	0.231668	4.97573	6.5001e-07	3.97228e-06	1.08011	0.225073	4.79895	1.59501e-06	9.32084e-06	18.6541	38.8299	41.1155
miR-944	342.898	2.12987	0.431123	4.94028	7.80108e-07	4.67565e-06	1.6253	0.417172	3.896	9.77929e-05	0.000390754	101.246	310.88	441.059
miR-96	156.648	3.85007	0.327102	11.7702	5.55652e-32	1.73178e-29	3.63185	0.317862	11.4259	3.10465e-30	1.45142e-27	12.0638	155.226	180.653
miR-99a	1343.55	-3.05128	0.391068	-7.80244	6.07208e-15	1.15865e-13	-1.98594	0.378259	-5.25023	1.51913e-07	1.0444e-06	5514.74	1392.13	665.26

## Sheet: BRCA
DEMs	baseMean	log2FoldChange.early	lfcSE.early	stat.early	pvalue.early	padj.early	log2FoldChange.advanced	lfcSE.advanced	stat.advanced	pvalue.advanced	padj.advanced	Mean.HC	Mean.Early	Mean.Advanced
let-7c	8542.81	-1.82562	0.109904	-16.611	5.79946e-62	2.21979e-60	-1.70211	0.121168	-14.0475	7.97989e-45	2.31873e-43	24371.6	7490.11	6875.61
miR-1-1	8.55434	-2.03254	0.156995	-12.9466	2.45737e-38	3.84181e-37	-1.65928	0.173996	-9.53635	1.47945e-21	1.29707e-20	1056.66	43.1542	7.48573
miR-1-2	9.12809	-1.98991	0.150278	-13.2415	5.05185e-40	9.19272e-39	-1.63014	0.166573	-9.78631	1.28914e-22	1.2028e-21	1129.01	45.2529	8.05946
miR-100	10798.3	-1.92637	0.106753	-18.045	8.63688e-73	4.3577e-71	-1.8245	0.117694	-15.502	3.36295e-54	1.36805e-52	32521.9	9181.93	8555.97
miR-105-1	30.8233	5.61304	0.4763	11.7847	4.68171e-32	5.35743e-31	5.60069	0.519133	10.7885	3.89947e-27	4.72114e-26	0.693271	40.7867	50.2596
miR-105-2	31.0668	5.61917	0.500074	11.2367	2.69311e-29	2.82014e-28	5.63492	0.545613	10.3277	5.28122e-25	5.53711e-24	0.690887	42.1212	50.3895
miR-106a	63.1771	1.04793	0.133975	7.82182	5.20639e-15	2.87517e-14	1.10153	0.147413	7.47239	7.87512e-14	4.26011e-13	31.5778	68.115	65.6678
miR-10b	269773	-1.98475	0.107185	-18.5171	1.50373e-76	8.34569e-75	-1.76996	0.118168	-14.9783	1.01825e-50	3.98292e-49	824385	241724	208286
miR-1247	131.552	-1.59395	0.179882	-8.86107	7.92473e-19	5.36369e-18	-1.88011	0.198441	-9.47439	2.68316e-21	2.27398e-20	350.523	95.2174	116.172
miR-1258	4.90043	-2.55416	0.174172	-14.6646	1.0863e-48	2.67953e-47	-2.1722	0.193857	-11.2052	3.84631e-29	5.50943e-28	19.3972	4.22996	3.2561
miR-125b-1	1236.78	-1.97468	0.0958043	-20.6116	2.16134e-94	1.84545e-92	-1.93796	0.105641	-18.3448	3.63308e-75	3.07904e-73	3850.71	1004.67	979.401
miR-125b-2	1296.21	-1.95924	0.0957546	-20.461	4.79119e-93	3.79873e-91	-1.91391	0.105585	-18.1268	1.95757e-73	1.53142e-71	4000.73	1061.38	1028.52
miR-1262	2.28874	-1.3957	0.141716	-9.84855	6.95423e-23	5.71792e-22	-1.45208	0.161235	-9.00595	2.13809e-19	1.63492e-18	5.24269	1.95358	2.02489
miR-1269a	132.959	5.64745	0.433935	13.0145	1.01206e-38	1.6767e-37	4.35361	0.476938	9.12825	6.96179e-20	5.53136e-19	3.44679	182.426	270.191
miR-1269b	14.8925	5.52062	0.652972	8.45461	2.80027e-17	1.69852e-16	5.35018	0.714537	7.48762	7.01354e-14	3.83482e-13	0.358109	31.0921	32.4355
miR-129-2	5.3213	-1.19649	0.207787	-5.75823	8.50001e-09	3.26471e-08	-1.65599	0.231744	-7.14578	8.94853e-13	4.59629e-12	11.7832	3.68506	8.23937
miR-1295a	3.53173	-1.32539	0.164206	-8.07151	6.94363e-16	3.99349e-15	-1.24869	0.183303	-6.81213	9.61646e-12	4.52775e-11	7.88454	3.25936	3.06773
miR-1301	45.4792	1.85325	0.107597	17.224	1.75327e-66	7.78453e-65	1.74693	0.117577	14.8578	6.19517e-50	2.33351e-48	13.6285	45.9005	49.4228
miR-130b	68.8863	1.47214	0.0987136	14.9132	2.70412e-50	6.98041e-49	1.2552	0.108381	11.5814	5.12014e-31	8.13622e-30	27.0908	65.0347	75.5359
miR-133a-1	6.41627	-2.419	0.168807	-14.33	1.42172e-46	3.28773e-45	-2.00643	0.187398	-10.7068	9.45877e-27	1.09313e-25	889.655	15.3655	4.83579
miR-133a-2	6.17902	-2.29418	0.175704	-13.0571	5.79115e-39	9.8895e-38	-1.92561	0.195029	-9.87348	5.42483e-23	5.15612e-22	772.639	13.3383	4.37575
miR-133b	1.12056	-2.28603	0.250903	-9.11119	8.14821e-20	5.79776e-19	-1.9121	0.281256	-6.79844	1.05759e-11	4.93381e-11	345.845	6.35183	1.40164
miR-135b	61.0265	2.35969	0.245768	9.60129	7.89476e-22	6.1281e-21	1.78254	0.270521	6.58929	4.41936e-11	1.99755e-10	13.9892	48.1248	71.6947
miR-139	237.202	-3.13602	0.108381	-28.9353	4.30211e-184	4.77534e-181	-2.9769	0.119605	-24.8894	9.69559e-137	4.93021e-134	1220.57	154.836	138.742
miR-140	2293.16	-1.17546	0.0935631	-12.5632	3.36288e-36	4.666e-35	-1.21949	0.103159	-11.8215	3.02194e-32	4.95695e-31	4703.69	2019.49	2082.06
miR-141	5353.66	2.21409	0.0969865	22.8289	2.36912e-115	3.28715e-113	2.06265	0.106911	19.2932	6.12448e-83	6.2286e-81	1274.31	5323.85	5912.97
miR-142	7473.25	1.85462	0.127549	14.5404	6.71879e-48	1.62127e-46	1.70788	0.140614	12.1459	6.03369e-34	1.04005e-32	2256.75	7373	8162.28
miR-143	139447	-1.30263	0.112804	-11.5478	7.57694e-31	8.41041e-30	-1.03418	0.124363	-8.31587	9.10808e-17	6.09402e-16	292617	142882	118623
miR-144	317.919	-3.13241	0.171284	-18.2878	1.03435e-74	5.46726e-73	-2.32987	0.18885	-12.3371	5.71616e-35	1.0381e-33	1502.65	299.325	171.365
miR-145	5419	-2.40174	0.0934278	-25.7069	9.78589e-146	1.55176e-143	-2.32434	0.103007	-22.565	9.56547e-113	1.38973e-110	20624.1	4118.07	3902.92
miR-1468	20.5732	-1.1029	0.128816	-8.5618	1.11117e-17	6.96837e-17	-1.254	0.14274	-8.78525	1.56022e-18	1.16124e-17	41.1172	17.2688	19.0397
miR-148b	592.956	1.18614	0.0800136	14.8242	1.02122e-49	2.57626e-48	1.22174	0.0881517	13.8595	1.11461e-43	3.06368e-42	271.135	633.133	617.69
miR-155	1183.08	1.43629	0.110638	12.9819	1.54968e-38	2.52963e-37	1.25582	0.121952	10.2977	7.21658e-25	7.48904e-24	477.893	1141.45	1293.44
miR-181b-1	598.147	1.33266	0.0972597	13.7021	9.86579e-43	1.9911e-41	1.45838	0.107162	13.6091	3.53466e-42	8.35989e-41	245.672	674.735	618.453
miR-181b-2	541.079	1.2649	0.101358	12.4795	9.65373e-36	1.29104e-34	1.38726	0.111681	12.4216	1.99584e-35	3.75883e-34	232.75	608.457	559.007
miR-182	136506	2.31974	0.110128	21.0641	1.69666e-98	1.71208e-96	2.26087	0.121412	18.6215	2.15261e-77	1.99018e-75	29687.5	142286	148212
miR-183	50485.3	2.93438	0.109628	26.7668	7.87857e-158	1.45754e-155	2.825	0.120859	23.3743	7.79954e-121	1.32202e-118	7267.25	51495.9	55552.1
miR-184	164.285	4.61469	0.280784	16.435	1.07405e-60	3.8458e-59	4.99819	0.308354	16.2093	4.33635e-59	2.10003e-57	16.8975	278.772	324.119
miR-187	128.687	3.10636	0.24762	12.5449	4.24072e-36	5.81136e-35	2.9104	0.272511	10.6799	1.26358e-26	1.41216e-25	16.8229	126.472	144.955
miR-188	7.69184	1.30035	0.144398	9.00531	2.15049e-19	1.48264e-18	1.35546	0.15644	8.66444	4.5374e-18	3.22695e-17	3.22227	8.39086	8.05762
miR-18a	34.5192	1.31591	0.146015	9.01216	2.02041e-19	1.40166e-18	1.13245	0.160467	7.05721	1.69879e-12	8.59538e-12	14.9325	33.2169	37.6389
miR-190b	60.5601	3.35515	0.188764	17.7743	1.118e-70	5.39557e-69	3.52671	0.206292	17.0957	1.59717e-65	9.02401e-64	6.27544	71.9345	63.8482
miR-191	3218.05	1.20924	0.0962203	12.5674	3.19206e-36	4.48505e-35	1.20667	0.106071	11.3761	5.50145e-30	8.47723e-29	1464.65	3381.17	3387.18
miR-192	1463.43	1.43617	0.102224	14.0492	7.79192e-45	1.69589e-43	1.55273	0.112672	13.781	3.31629e-43	8.87544e-42	560.724	1645.67	1517.92
miR-193a	1469.8	-1.24566	0.0807227	-15.4314	1.00696e-53	2.79432e-52	-1.21373	0.0890078	-13.6362	2.43976e-42	6.05178e-41	3097.48	1335.44	1306.17
miR-195	159.669	-1.46891	0.0915212	-16.05	5.71917e-58	1.76341e-56	-1.2441	0.100984	-12.3199	7.08145e-35	1.26348e-33	369.807	156.004	133.409
miR-196a-1	1063.43	3.19291	0.187473	17.0313	4.81163e-65	2.0542e-63	3.39041	0.206588	16.4114	1.58478e-60	8.05862e-59	121.457	1273.53	1110.59
miR-196a-2	1235.42	3.04262	0.185314	16.4187	1.40552e-60	4.87539e-59	3.25169	0.204229	15.9217	4.47806e-57	2.07008e-55	156.008	1485.81	1285.36
miR-19a	85.5693	1.20694	0.124867	9.66586	4.2107e-22	3.33848e-21	1.03487	0.137451	7.52904	5.11138e-14	2.82515e-13	39.9869	82.0473	92.4698
miR-200a	2675.83	2.06704	0.0991994	20.8373	1.98873e-96	1.83958e-94	1.96847	0.10934	18.0032	1.83761e-72	1.2459e-70	696.718	2726.25	2918.99
miR-200b	2045.71	1.64191	0.101812	16.127	1.6496e-58	5.2316e-57	1.57858	0.112223	14.0664	6.10691e-45	1.82668e-43	706.634	2110.36	2205.08
miR-200c	33058.6	1.4847	0.0914561	16.234	2.89897e-59	9.46427e-58	1.43119	0.100826	14.1946	9.89885e-46	3.05064e-44	12660.3	34140.4	35430.4
miR-203a	19988.7	2.0607	0.163746	12.5848	2.56035e-36	3.69089e-35	2.04054	0.180523	11.3035	1.261e-29	1.85861e-28	5160.36	21229.5	21528.2
miR-203b	185.183	2.42893	0.202894	11.9715	5.01417e-33	6.18414e-32	2.50413	0.22342	11.2082	3.71776e-29	5.40138e-28	36.4274	206.462	195.976
miR-204	15.9749	-2.78144	0.201042	-13.8351	1.56504e-43	3.21702e-42	-2.42701	0.222239	-10.9207	9.17463e-28	1.15701e-26	70.1232	12.9023	10.0844
miR-205	7990.47	-1.42658	0.184566	-7.72934	1.08108e-14	5.9113e-14	-1.72909	0.203481	-8.49755	1.93631e-17	1.33056e-16	19402.9	5852.76	7218.13
miR-206	3.26992	-2.58793	0.448067	-5.77577	7.66007e-09	2.95232e-08	-1.82286	0.494401	-3.68701	0.000226904	0.000575465	1420.86	260.252	18.9629
miR-21	704424	2.08176	0.0766945	27.1435	3.02103e-162	1.11778e-159	2.14565	0.0845533	25.3763	4.61053e-142	4.68891e-139	176381	780472	746662
miR-210	1910.65	3.08805	0.164085	18.8198	5.19502e-79	3.39204e-77	2.99379	0.180848	16.5542	1.49313e-61	7.99219e-60	243.93	1943.3	2074.55
miR-215	18.8468	-1.277	0.129729	-9.84361	7.30426e-23	5.96156e-22	-1.16455	0.143565	-8.1117	4.99149e-16	3.11432e-15	39.7458	17.8621	16.5212
miR-299	10.6294	-1.23741	0.109212	-11.3304	9.27977e-30	9.90437e-29	-1.30362	0.121836	-10.6998	1.01962e-26	1.15216e-25	22.6855	9.15024	9.58533
miR-301a	55.2098	2.00647	0.141468	14.1832	1.16488e-45	2.6388e-44	1.99472	0.155139	12.8576	7.79279e-38	1.6511e-36	14.5809	58.701	59.1456
miR-3065	170.445	2.11095	0.162125	13.0205	9.3509e-39	1.57265e-37	2.2391	0.178458	12.5469	4.13242e-36	8.08206e-35	41.5849	195.989	179.411
miR-3127	26.7639	1.08528	0.115601	9.38819	6.10383e-21	4.57788e-20	1.14701	0.126624	9.05841	1.32361e-19	1.0435e-18	13.1289	29.0007	27.8506
miR-3150b	8.22722	1.7151	0.216375	7.92652	2.2538e-15	1.26991e-14	1.95435	0.2354	8.30225	1.02156e-16	6.79035e-16	2.56444	9.86587	8.44204
miR-3170	6.33296	1.16748	0.160955	7.25348	4.06212e-13	2.04953e-12	1.02949	0.175341	5.87134	4.32279e-09	1.71062e-08	2.94999	6.19939	6.79288
miR-3199-2	2.51362	-1.84107	0.104989	-17.5357	7.64713e-69	3.5368e-67	-1.80388	0.121624	-14.8316	9.14625e-50	3.32205e-48	7.45297	2.05672	2.04078
miR-32	78.9881	1.30615	0.082732	15.7877	3.77947e-56	1.13384e-54	1.24129	0.090765	13.6758	1.41548e-42	3.59885e-41	33.6583	80.582	84.2207
miR-3200	13.4637	1.54505	0.175674	8.79497	1.43085e-18	9.28795e-18	1.35151	0.19225	7.02999	2.06552e-12	1.0247e-11	4.89609	12.8358	14.7532
miR-326	31.8554	-1.33406	0.141024	-9.45977	3.08616e-21	2.33036e-20	-1.34251	0.155865	-8.61325	7.10192e-18	4.98114e-17	71.0205	27.9304	28.1605
miR-335	353.111	-1.96119	0.12484	-15.7096	1.30035e-55	3.7984e-54	-1.75652	0.137672	-12.7588	2.78592e-37	5.7822e-36	1068.04	315.977	274.318
miR-337	129.093	-1.95526	0.118836	-16.4534	7.93211e-61	2.93488e-59	-2.07466	0.131194	-15.8136	2.50595e-56	1.10807e-54	404.389	95.9475	104.167
miR-33a	54.6359	1.54076	0.130117	11.8413	2.3865e-32	2.8181e-31	1.55284	0.142868	10.869	1.61913e-27	1.98392e-26	19.72	58.4542	57.9537
miR-33b	23.4287	2.69146	0.178215	15.1024	1.56212e-51	4.12847e-50	2.70416	0.193704	13.9603	2.72459e-44	7.69696e-43	3.84588	25.321	25.0744
miR-342	1404.09	1.50786	0.116347	12.96	2.06154e-38	3.31639e-37	1.58673	0.128243	12.3728	3.66625e-35	6.77922e-34	517.031	1552.98	1470.31
miR-345	69.7558	1.13481	0.126802	8.94948	3.57163e-19	2.43221e-18	1.14147	0.139501	8.1825	2.78025e-16	1.76719e-15	33.0574	73.4757	73.0085
miR-3614	13.1986	1.32255	0.162039	8.16189	3.29824e-16	1.93706e-15	1.5435	0.176857	8.72735	2.60704e-18	1.89383e-17	5.36114	15.5577	13.4075
miR-365a	335.387	-1.5044	0.0890332	-16.897	4.73091e-64	1.87547e-62	-1.42718	0.0982131	-14.5315	7.65322e-48	2.43229e-46	812.136	302.01	286.24
miR-365b	334.289	-1.50983	0.0889172	-16.9802	1.15171e-64	4.73482e-63	-1.43196	0.0980856	-14.5991	2.84566e-48	9.64678e-47	811.818	300.889	285.049
miR-3677	36.163	2.06141	0.154784	13.318	1.82001e-40	3.36702e-39	2.11651	0.169398	12.4943	8.01646e-36	1.53825e-34	9.13334	39.7934	38.4702
miR-370	31.1601	-1.02478	0.109715	-9.34031	9.60484e-21	7.10758e-20	-1.11154	0.121451	-9.15215	5.5812e-20	4.46935e-19	57.5938	26.6219	28.2546
miR-375	72597.1	2.71455	0.19396	13.9954	1.66291e-44	3.54967e-43	2.79674	0.213835	13.079	4.34213e-39	9.59989e-38	11839.5	82268.5	77712.6
miR-376c	15.1495	-1.12409	0.115413	-9.73966	2.04227e-22	1.64269e-21	-1.21665	0.128214	-9.48917	2.32891e-21	1.99034e-20	30.3219	13.0528	13.818
miR-377	9.87317	-1.31493	0.108156	-12.1577	5.21988e-34	6.58417e-33	-1.33835	0.120749	-11.0837	1.50466e-28	2.06789e-27	21.8425	8.56762	8.69366
miR-378a	1127.25	-2.39691	0.109082	-21.9734	5.17605e-107	5.74541e-105	-2.40882	0.120283	-20.0262	3.25717e-89	3.6806e-87	4331.1	815.514	822.212
miR-378c	15.5001	-2.02271	0.108095	-18.7124	3.92594e-78	2.29358e-76	-2.07083	0.120602	-17.1708	4.39192e-66	2.79161e-64	50.291	11.9178	12.2579
miR-379	2336.31	-1.26365	0.113095	-11.1734	5.50568e-29	5.65861e-28	-1.20264	0.12469	-9.64501	5.1604e-22	4.68582e-21	4938.86	2145.6	2056.85
miR-381	90.5256	-1.38546	0.107945	-12.8348	1.04607e-37	1.59059e-36	-1.28063	0.119158	-10.7473	6.10111e-27	7.13198e-26	204.675	83.8731	78.0115
miR-383	4.14171	-1.84529	0.344709	-5.35319	8.6417e-08	3.1043e-07	-2.30998	0.382711	-6.03582	1.58155e-09	6.43375e-09	12.9468	2.62679	5.09085
miR-429	357.185	2.6454	0.117295	22.5533	1.24626e-112	1.53705e-110	2.65137	0.129041	20.5467	8.24443e-94	1.04807e-91	61.6147	387.291	385.682
miR-432	20.7061	-1.20025	0.131758	-9.10947	8.27858e-20	5.85301e-19	-1.34472	0.146009	-9.20983	3.26635e-20	2.63641e-19	42.5642	16.6497	18.416
miR-4326	22.6495	1.83988	0.179108	10.2725	9.37647e-25	8.46169e-24	1.92061	0.196027	9.79766	1.15228e-22	1.08507e-21	6.67849	25.1502	23.7772
miR-433	3.86354	-1.41839	0.137341	-10.3275	5.29238e-25	4.93659e-24	-1.50807	0.15485	-9.73894	2.05696e-22	1.88462e-21	8.94986	3.11961	3.30884
miR-449a	25.32	5.44559	0.404329	13.4682	2.40698e-41	4.60647e-40	5.28093	0.438603	12.0404	2.18016e-33	3.69537e-32	0.630789	40.4706	32.3657
miR-449b	5.1279	4.15549	0.462637	8.98219	2.65439e-19	1.81875e-18	4.03133	0.503081	8.01329	1.11676e-15	6.7604e-15	0.210015	7.10742	5.76893
miR-451a	1288.47	-3.38559	0.173961	-19.4618	2.31549e-84	1.60637e-82	-3.28347	0.191804	-17.1189	1.07236e-65	6.41522e-64	7302.96	750.08	698.672
miR-452	187.302	-1.88816	0.168961	-11.1751	5.39953e-29	5.60138e-28	-1.89675	0.186348	-10.1785	2.47265e-24	2.46538e-23	561.229	150.698	151.544
miR-454	32.543	1.43533	0.104812	13.6943	1.09835e-42	2.17709e-41	1.5028	0.114443	13.1315	2.17268e-39	4.91025e-38	12.4036	35.637	34.0821
miR-4668	13.6843	1.61203	0.147204	10.951	6.57218e-28	6.5135e-27	1.594	0.160185	9.95102	2.49604e-23	2.44084e-22	4.64619	14.4343	14.5436
miR-4724	5.14598	4.13499	0.306641	13.4848	1.92186e-41	3.74257e-40	4.24624	0.327158	12.9792	1.60567e-38	3.4744e-37	0.197746	6.00662	5.52407
miR-4728	12.4367	1.34321	0.208284	6.44894	1.12638e-10	5.02123e-10	1.57772	0.228086	6.91722	4.60601e-12	2.22005e-11	5.04604	14.9056	13.2442
miR-4732	1.19126	-4.15658	0.264704	-15.7028	1.4476e-55	4.1201e-54	-3.55333	0.299094	-11.8803	1.4986e-32	2.49849e-31	8.2388	0.82842	0.401025
miR-4746	8.26377	1.43287	0.139208	10.293	7.57756e-25	6.89433e-24	1.32367	0.15083	8.77591	1.69523e-18	1.24931e-17	3.28966	8.28776	8.90895
miR-483	21.9172	-1.40178	0.176369	-7.948	1.8954e-15	1.07341e-14	-1.90702	0.195347	-9.76221	1.63553e-22	1.51212e-21	54.4313	25.6543	31.4655
miR-486-1	293.533	-4.703	0.175167	-26.8487	8.72343e-159	2.42075e-156	-4.55946	0.193242	-23.5945	4.39112e-123	1.11644e-120	2371.41	100.482	90.9449
miR-486-2	291.548	-4.70536	0.17532	-26.8386	1.14564e-158	2.54332e-156	-4.54374	0.19341	-23.4928	4.83293e-122	9.83017e-120	2354.01	100.844	90.1309
miR-493	37.7077	1.34153	0.116184	11.5467	7.67319e-31	8.43291e-30	1.20599	0.127436	9.46346	2.97908e-21	2.5039e-20	15.6529	36.2122	39.704
miR-494	5.16843	-1.13163	0.132861	-8.5174	1.63177e-17	1.01757e-16	-1.22977	0.148805	-8.26429	1.40529e-16	9.10303e-16	10.3914	4.45221	4.73098
miR-495	23.5008	-1.42864	0.111463	-12.8172	1.3137e-37	1.97055e-36	-1.57006	0.123731	-12.6893	6.78165e-37	1.35234e-35	55.5416	18.8001	20.5641
miR-497	86.6652	-1.34828	0.0821784	-16.4067	1.71173e-60	5.75765e-59	-1.33018	0.0908358	-14.6438	1.47583e-48	5.1756e-47	193.934	77.0141	76.0866
miR-503	47.0655	1.25755	0.134141	9.37485	6.92732e-21	5.16062e-20	1.52779	0.147272	10.3739	3.25896e-25	3.45246e-24	19.492	56.4917	46.8581
miR-511	26.9615	-1.95778	0.129521	-15.1155	1.28035e-51	3.46631e-50	-1.97151	0.143465	-13.7421	5.67909e-43	1.48093e-41	83.6568	21.2895	21.5462
miR-519a-1	8.82144	2.3597	0.369276	6.39008	1.65801e-10	7.30312e-10	2.10854	0.404727	5.2098	1.89049e-07	6.53956e-07	1.89537	10.6402	17.7622
miR-551b	5.87102	-2.20934	0.153843	-14.361	9.09363e-47	2.14764e-45	-2.52811	0.17344	-14.5763	3.97359e-48	1.30359e-46	21.1005	3.71964	4.63227
miR-5586	10.4438	1.04847	0.118839	8.82262	1.11808e-18	7.34361e-18	1.02285	0.129361	7.90688	2.63915e-15	1.57883e-14	5.32637	10.8145	11.0106
miR-5683	43.0867	-2.35604	0.199902	-11.786	4.61111e-32	5.3316e-31	-2.41044	0.220729	-10.9203	9.21516e-28	1.15701e-26	163.582	30.6775	31.8834
miR-584	149.779	-1.35929	0.131594	-10.3294	5.19059e-25	4.88267e-24	-1.76556	0.14524	-12.1561	5.3218e-34	9.3315e-33	356.619	104.927	138.959
miR-585	1.86585	-2.08774	0.164176	-12.7164	4.79247e-37	7.09286e-36	-1.77681	0.18514	-9.59716	8.21739e-22	7.39565e-21	5.99161	1.71324	1.39209
miR-590	53.7277	1.09361	0.092278	11.8512	2.12096e-32	2.53147e-31	1.09125	0.101252	10.7776	4.39408e-27	5.25739e-26	26.1079	56.4874	56.3904
miR-592	12.6511	4.67561	0.229907	20.337	6.05396e-92	4.47993e-90	4.34203	0.240923	18.0225	1.29793e-72	9.42853e-71	0.534674	11.5755	14.6351
miR-615	33.1984	1.18537	0.148798	7.96635	1.63434e-15	9.30319e-15	1.29444	0.163425	7.9207	2.36175e-15	1.42124e-14	15.0088	36.9413	34.1907
miR-6510	28.4539	-1.06621	0.24432	-4.36399	1.2771e-05	3.74032e-05	-1.62587	0.269848	-6.02515	1.68949e-09	6.84546e-09	58.3148	19.0264	27.9258
miR-654	66.7185	-1.14352	0.119356	-9.58082	9.62811e-22	7.42167e-21	-1.15774	0.131787	-8.78495	1.5643e-18	1.16124e-17	133.492	59.7247	60.3253
miR-6716	2.49698	-1.4518	0.103827	-13.9829	1.98321e-44	4.15352e-43	-1.35606	0.118884	-11.4066	3.87506e-30	6.06298e-29	5.84481	2.30402	2.12557
miR-675	133.618	-1.28436	0.14117	-9.09798	9.20251e-20	6.4244e-19	-1.13037	0.155703	-7.25977	3.87753e-13	2.06463e-12	282.508	129.099	116.055
miR-676	2.37951	-1.42146	0.11577	-12.2783	1.18486e-34	1.54729e-33	-1.41202	0.132592	-10.6493	1.75629e-26	1.94146e-25	5.4438	2.0029	2.10361
miR-6892	8.56611	-1.50162	0.106787	-14.0617	6.52584e-45	1.44874e-43	-1.34953	0.119188	-11.3227	1.01281e-29	1.51475e-28	20.0559	7.94693	7.24168
miR-7-1	106.32	1.21998	0.108097	11.286	1.53896e-29	1.6269e-28	1.17714	0.118937	9.8972	4.28099e-23	4.14644e-22	48.4691	109.867	113.226
miR-758	58.0623	-1.00789	0.115097	-8.75683	2.00819e-18	1.28108e-17	-1.07768	0.127134	-8.47677	2.31532e-17	1.58032e-16	108.299	51.1106	53.6798
miR-760	10.0561	2.35972	0.194557	12.1287	7.4401e-34	9.27922e-33	2.25117	0.210384	10.7003	1.01483e-26	1.15216e-25	2.12622	10.149	11.0139
miR-767	21.2032	5.71952	0.495982	11.5317	9.13206e-31	9.93783e-30	5.89748	0.539783	10.9256	8.69311e-28	1.1191e-26	0.431015	28.0287	35.914
miR-7706	6.26302	1.59309	0.14674	10.8565	1.85631e-27	1.82346e-26	1.50031	0.157781	9.50882	1.92829e-21	1.66192e-20	2.2894	6.31693	6.72476
miR-877	5.59207	1.74911	0.181498	9.63708	5.5749e-22	4.38875e-21	1.49802	0.19627	7.63246	2.30311e-14	1.30853e-13	1.8045	5.21052	6.18292
miR-891a	5.74257	-1.91042	0.196979	-9.69864	3.05552e-22	2.44002e-21	-1.78604	0.218789	-8.16329	3.2601e-16	2.04662e-15	16.865	5.06957	6.06108
miR-9-1	2776.29	1.90418	0.217094	8.77121	1.76762e-18	1.14073e-17	1.47663	0.239333	6.16976	6.83935e-10	2.9103e-09	840.588	2339.35	3146.23
miR-9-2	2774.23	1.90275	0.217272	8.75747	1.99676e-18	1.28108e-17	1.471	0.239529	6.14123	8.1887e-10	3.44128e-09	841.198	2331.94	3145.41
miR-9-3	2784.34	1.8991	0.217157	8.74526	2.22506e-18	1.41132e-17	1.47101	0.239402	6.14451	8.02123e-10	3.38489e-09	845.987	2345.22	3155.3
miR-92b	358.085	1.43052	0.110473	12.9491	2.37717e-38	3.76952e-37	1.34675	0.121707	11.0655	1.84469e-28	2.5014e-27	143.038	363.372	385.161
miR-93	14801.5	1.13255	0.0867178	13.0601	5.56321e-39	9.64869e-38	1.01018	0.0956021	10.5665	4.25989e-26	4.56033e-25	7245.44	14593.6	15885.3
miR-937	11.1755	2.51466	0.211298	11.901	1.16978e-32	1.42687e-31	2.50941	0.228821	10.9667	5.525e-28	7.20375e-27	2.13899	11.8877	12.0238
miR-940	14.8801	2.0406	0.163667	12.468	1.11606e-35	1.4748e-34	1.97297	0.177907	11.0899	1.4045e-28	1.95668e-27	3.8616	15.4031	16.2044
miR-944	6.37781	-1.64392	0.191946	-8.56448	1.08568e-17	6.84718e-17	-1.28514	0.212408	-6.05033	1.44547e-09	5.9038e-09	16.0509	6.63976	5.05918
miR-96	112.096	3.27357	0.118782	27.5594	3.41513e-167	1.8954e-164	3.15534	0.129625	24.342	7.04625e-131	2.38868e-128	12.792	114.342	124.095
miR-99a	2658.42	-2.14811	0.114262	-18.7998	7.57365e-79	4.67042e-77	-1.9906	0.125977	-15.8013	3.04839e-56	1.29175e-54	8880.26	2234.33	2003.27

## Sheet: HNSC
DEMs	baseMean	log2FoldChange.early	lfcSE.early	stat.early	pvalue.early	padj.early	log2FoldChange.advanced	lfcSE.advanced	stat.advanced	pvalue.advanced	padj.advanced	Mean.HC	Mean.Early	Mean.Advanced
let-7c	9565.87	-2.08484	0.222806	-9.3572	8.18763e-21	2.17213e-19	-1.99946	0.197025	-10.1482	3.37372e-24	7.22725e-23	30194.5	7551.39	7117.39
miR-1-1	1310.24	-3.12352	0.49997	-6.24743	4.17272e-10	3.11058e-09	-3.28043	0.442114	-7.41987	1.17233e-13	1.07631e-12	7841.71	807.005	899.736
miR-1-2	1397.57	-3.11369	0.500372	-6.22275	4.88522e-10	3.61186e-09	-3.26493	0.44247	-7.37887	1.59639e-13	1.41185e-12	8323.33	865.824	961.53
miR-100	12576.7	-1.66885	0.184316	-9.05432	1.37425e-19	3.09894e-18	-1.8042	0.162989	-11.0694	1.76538e-28	5.86836e-27	37316.7	10685.1	11736.2
miR-101-1	19450.7	-2.09319	0.145541	-14.3821	6.70139e-47	2.01488e-44	-2.09318	0.128701	-16.2639	1.77903e-59	5.71662e-57	65299.7	15303.7	15303.8
miR-101-2	19614.5	-2.09567	0.145132	-14.4397	2.91124e-47	1.31297e-44	-2.09662	0.128339	-16.3366	5.42141e-60	2.61312e-57	65947.7	15418.8	15429.1
miR-105-1	139.397	5.40388	0.60789	8.88957	6.13483e-19	1.25764e-17	5.92414	0.540861	10.9532	6.41666e-28	1.81931e-26	2.77642	169.706	118.321
miR-105-2	139.447	5.32994	0.616602	8.64404	5.42591e-18	9.9881e-17	5.87508	0.548405	10.713	8.84141e-27	2.24293e-25	2.86132	169.799	116.355
miR-1245a	13.1676	1.00231	0.23197	4.32088	1.55409e-05	5.84081e-05	1.2472	0.206653	6.03523	1.58736e-09	9.44579e-09	6.28046	14.939	12.3723
miR-1247	367.428	-1.33704	0.307752	-4.34455	1.39561e-05	5.28926e-05	-1.34589	0.272107	-4.94619	7.56808e-07	3.06539e-06	868.281	341.625	343.721
miR-1258	2.97123	-2.45388	0.31927	-7.68592	1.519e-14	1.92977e-13	-2.54264	0.275637	-9.22461	2.84607e-20	4.14433e-19	12.4746	2.20681	2.28986
miR-125b-1	1055.67	-1.09024	0.147773	-7.37777	1.60964e-13	1.81487e-12	-1.10086	0.13065	-8.42601	3.57653e-17	4.25651e-16	2064.52	962.39	969.572
miR-125b-2	1172.08	-1.15899	0.151471	-7.6516	1.98494e-14	2.48669e-13	-1.16437	0.133922	-8.69443	3.48572e-18	4.42136e-17	2371.59	1057.93	1061.99
miR-1269a	433.973	3.80619	0.536037	7.10061	1.24205e-12	1.2588e-11	4.31681	0.474417	9.09919	9.10119e-20	1.25336e-18	25.0047	497.954	349.494
miR-1269b	73.2776	5.63716	0.915523	6.15731	7.39892e-10	5.42587e-09	5.88989	0.813814	7.23739	4.57402e-13	3.86785e-12	1.45465	87.0465	72.9996
miR-127	3804.47	-1.54244	0.19205	-8.03143	9.63391e-16	1.40158e-14	-1.48158	0.169824	-8.72421	2.68048e-18	3.44531e-17	9769.32	3498.42	3353.91
miR-1293	75.1095	2.88102	0.311779	9.2406	2.45125e-20	6.14175e-19	2.77486	0.277017	10.0169	1.28424e-23	2.57917e-22	12.1558	83.1347	89.6185
miR-1301	38.4213	1.63146	0.130889	12.4645	1.16651e-35	1.1691e-33	1.62986	0.117819	13.8337	1.59703e-43	1.53954e-41	12.9673	40.1463	40.4687
miR-1304	13.7093	1.16214	0.37234	3.12118	0.00180131	0.00442719	1.84942	0.330615	5.59388	2.22046e-08	1.09771e-07	4.41664	15.8321	9.82051
miR-130b	153.516	1.21129	0.121678	9.95492	2.40016e-23	9.02061e-22	1.37236	0.107976	12.7098	5.21356e-37	2.6452e-35	61.3609	158.72	141.977
miR-133a-1	1164.32	-2.74751	0.497985	-5.51726	3.44318e-08	1.97818e-07	-2.98075	0.44036	-6.76889	1.29771e-11	1.00079e-10	6171.14	781.702	918.911
miR-133a-2	1019.95	-2.76176	0.50019	-5.52142	3.36272e-08	1.94434e-07	-2.98322	0.442308	-6.74466	1.53382e-11	1.15516e-10	5418.38	685.166	798.891
miR-133b	456.334	-2.64575	0.539519	-4.9039	9.39532e-07	4.4603e-06	-2.89479	0.477075	-6.0678	1.29678e-09	7.81308e-09	2331.05	313.386	372.474
miR-135a-1	1.6784	-3.53058	0.615467	-5.73643	9.6692e-09	6.01491e-08	-3.09809	0.532029	-5.82317	5.77432e-09	3.12722e-08	9.25089	1.04405	0.749968
miR-135a-2	1.97624	-4.63586	0.56589	-8.19216	2.5657e-16	3.92248e-15	-3.87997	0.481901	-8.0514	8.18523e-16	8.96655e-15	14.5382	0.968842	0.532602
miR-135b	207.831	1.10795	0.213286	5.19469	2.05065e-07	1.06304e-06	1.25045	0.18875	6.62493	3.47417e-11	2.48081e-10	88.2958	209.854	190.102
miR-136	159.334	-1.69565	0.192068	-8.82836	1.06219e-18	2.09481e-17	-1.6156	0.169654	-9.5229	1.68418e-21	2.61862e-20	435.449	142.144	134.547
miR-139	275.738	-1.74189	0.159313	-10.9338	7.94695e-28	3.98231e-26	-1.91411	0.140775	-13.5969	4.17549e-42	3.35431e-40	856.764	227.249	256.256
miR-140	4292.69	-1.1294	0.112168	-10.0689	7.58527e-24	2.97475e-22	-1.35247	0.0991838	-13.636	2.44733e-42	2.14475e-40	9620.38	3767.23	4397.38
miR-143	402709	-1.63533	0.240163	-6.80925	9.81058e-12	9.12283e-11	-1.27211	0.212377	-5.98987	2.10012e-09	1.22799e-08	944104	390909	303904
miR-144	805.922	-1.06409	0.266984	-3.9856	6.73086e-05	0.000217607	-1.25272	0.236079	-5.30637	1.1183e-07	5.10919e-07	1603.97	673.257	767.217
miR-148a	121819	-1.14342	0.177444	-6.44384	1.16485e-10	9.21662e-10	-1.18693	0.156915	-7.56414	3.90429e-14	3.76374e-13	239476	105187	108407
miR-151b	4.16178	-1.30524	0.172909	-7.54874	4.39502e-14	5.43056e-13	-1.2954	0.147127	-8.80468	1.31221e-18	1.73284e-17	8.86257	3.63241	3.64879
miR-183	36334.4	1.16091	0.183726	6.31868	2.63808e-10	2.03381e-09	1.49852	0.162471	9.22332	2.8804e-20	4.14433e-19	14189.5	40092.3	31727
miR-187	190.454	1.18276	0.312127	3.78935	0.000151045	0.000454141	1.57192	0.276128	5.69272	1.25031e-08	6.37724e-08	73.0332	217.11	165.737
miR-18a	110.673	1.49223	0.169039	8.82772	1.06831e-18	2.09481e-17	1.45639	0.14998	9.71053	2.7192e-22	4.85428e-21	41.712	114.909	117.581
miR-190a	14.7561	-1.32419	0.166984	-7.93007	2.19028e-15	2.94871e-14	-1.33784	0.145925	-9.168	4.81861e-20	6.83108e-19	33.6443	13.2853	13.6551
miR-1910	6.17942	3.49954	0.371846	9.41128	4.90131e-21	1.42612e-19	3.68328	0.350037	10.5225	6.8017e-26	1.63921e-24	0.584981	7.06884	6.19124
miR-193b	791.456	1.6917	0.184533	9.16743	4.8441e-20	1.14984e-18	1.69305	0.163262	10.3701	3.39029e-25	7.78152e-24	263.725	852.934	852.262
miR-195	129.739	-1.96976	0.175408	-11.2296	2.91905e-29	1.64562e-27	-1.89538	0.154825	-12.2421	1.85203e-34	7.76241e-33	405.547	109.414	103.931
miR-196a-1	159.909	4.09229	0.304031	13.4601	2.68589e-41	3.99193e-39	4.18059	0.270743	15.4412	8.64932e-54	1.38966e-51	9.43249	170.069	159.939
miR-196a-2	175.693	4.0668	0.302375	13.4495	3.09795e-41	3.99193e-39	4.19525	0.269125	15.5885	8.72031e-55	1.68128e-52	10.2342	187.738	171.728
miR-196b	765.881	3.25261	0.240497	13.5245	1.12061e-41	2.52698e-39	3.79723	0.213022	17.8255	4.47772e-71	4.31652e-68	59.9936	833.81	571.642
miR-19a	152.634	1.03448	0.186152	5.55716	2.74201e-08	1.60604e-07	1.07712	0.164799	6.53597	6.31996e-11	4.44704e-10	75.3557	159.13	154.414
miR-202	1.50647	-2.44102	0.371054	-6.57861	4.74873e-11	3.89396e-10	-2.37846	0.315966	-7.52757	5.16952e-14	4.83827e-13	5.8561	1.14659	1.12755
miR-204	26.8767	-2.21578	0.421295	-5.25945	1.44486e-07	7.66626e-07	-1.7092	0.371598	-4.5996	4.23307e-06	1.51698e-05	74.375	32.1475	15.957
miR-206	10046.1	-1.61719	0.529039	-3.05685	0.00223679	0.00535168	-2.1125	0.467832	-4.5155	6.3167e-06	2.21429e-05	34666	8016.34	11300
miR-208b	7.34178	-3.29829	0.664849	-4.96096	7.01442e-07	3.36543e-06	-3.18502	0.585827	-5.4368	5.42466e-08	2.60168e-07	43.8035	4.79137	4.42464
miR-21	1.30746e+06	1.18698	0.107902	11.0005	3.79881e-28	2.01561e-26	1.24579	0.0954187	13.0561	5.86925e-39	3.53622e-37	591207	1.40204e+06	1.34604e+06
miR-210	5205.53	2.28797	0.235065	9.73333	2.17363e-22	7.54082e-21	2.44293	0.207888	11.7512	6.96495e-32	2.58239e-30	1027.14	5584.79	5016.08
miR-211	2.29402	-3.87124	0.889084	-4.35419	1.33559e-05	5.10468e-05	-3.65023	0.779853	-4.68066	2.8595e-06	1.05212e-05	15.7398	1.24834	1.05563
miR-216a	1.82027	-2.05119	0.341722	-6.00251	1.94286e-09	1.33776e-08	-1.76206	0.291134	-6.05239	1.42715e-09	8.54516e-09	5.6236	1.63438	1.31223
miR-217	64.13	-1.13361	0.23192	-4.88794	1.01897e-06	4.81212e-06	-1.39012	0.204891	-6.7847	1.16329e-11	9.04367e-11	150.246	57.1505	68.3106
miR-218-1	81.9123	-1.45469	0.193629	-7.5128	5.78765e-14	6.86903e-13	-1.004	0.17075	-5.87996	4.10373e-09	2.2867e-08	161.172	80.1905	58.8455
miR-218-2	79.1688	-1.43126	0.191655	-7.4679	8.14851e-14	9.54539e-13	-1.00404	0.168999	-5.9411	2.83114e-09	1.64411e-08	155.677	77.4834	57.7563
miR-224	671.345	1.58082	0.197781	7.99279	1.31916e-15	1.83058e-14	1.67119	0.174978	9.55086	1.28622e-21	2.06652e-20	229.713	731.321	686.953
miR-2355	421.044	1.43861	0.168237	8.55113	1.21891e-17	2.11435e-16	1.48403	0.148895	9.96695	2.12659e-23	4.18375e-22	163.853	458.601	444.231
miR-26a-1	4614.47	-1.29729	0.123911	-10.4696	1.19198e-25	5.37581e-24	-1.37437	0.109567	-12.5436	4.31009e-36	2.07746e-34	10499.6	4049.95	4272.28
miR-26a-2	4640.39	-1.28605	0.123625	-10.4028	2.40665e-25	1.03371e-23	-1.37057	0.109315	-12.5378	4.63625e-36	2.12826e-34	10531.3	4072.85	4318.67
miR-299	40.9197	-2.37976	0.226116	-10.5245	6.65981e-26	3.16166e-24	-2.41863	0.199246	-12.1389	6.56933e-34	2.63868e-32	171.285	32.0729	33.1663
miR-29a	31893	-1.27795	0.131115	-9.74678	1.90412e-22	6.87006e-21	-1.52732	0.115945	-13.1728	1.25821e-39	8.0861e-38	77947.5	27041.5	32144.5
miR-29c	9722.2	-1.93336	0.205847	-9.39223	5.87419e-21	1.65579e-19	-2.31663	0.18203	-12.7267	4.20366e-37	2.25129e-35	34367.2	6898.57	8998.09
miR-301a	57.9033	1.7964	0.192592	9.32747	1.08431e-20	2.79442e-19	2.13749	0.171614	12.4552	1.30969e-35	5.73882e-34	14.392	63.8773	50.2512
miR-301b	6.91246	2.1082	0.29451	7.15831	8.16785e-13	8.56674e-12	2.59313	0.270485	9.58696	9.07165e-22	1.50777e-20	1.26111	7.61284	5.37636
miR-30a	47613.1	-2.09941	0.183391	-11.4477	2.41403e-30	1.55533e-28	-2.18703	0.162173	-13.4858	1.89581e-41	1.40582e-39	163266	35853.7	38098.7
miR-30e	42615	-1.24077	0.0920129	-13.4847	1.92329e-41	3.46962e-39	-1.29828	0.0813664	-15.956	2.58962e-57	6.24099e-55	91243.9	37100.8	38609.4
miR-31	744.77	2.40542	0.307681	7.81789	5.37144e-15	7.0218e-14	2.60434	0.272191	9.56806	1.08926e-21	1.77975e-20	137.952	838.805	730.823
miR-323b	13.7636	1.16088	0.264225	4.39351	1.11535e-05	4.31778e-05	1.34416	0.235389	5.71039	1.1272e-08	5.93783e-08	5.75743	14.9109	13.1858
miR-337	115.907	-1.88851	0.218813	-8.63072	6.09658e-18	1.09982e-16	-1.6349	0.193212	-8.4617	2.63506e-17	3.21544e-16	333.24	107.355	90.133
miR-338	1723.58	-1.029	0.173289	-5.93805	2.88428e-09	1.92713e-08	-1.18997	0.153229	-7.76592	8.10557e-15	8.13934e-14	3578.12	1568.2	1753.18
miR-3651	7.70622	1.46288	0.294343	4.96999	6.6958e-07	3.22974e-06	1.51234	0.264479	5.71817	1.07675e-08	5.73476e-08	2.58119	7.6043	7.21099
miR-3652	5.49	1.26165	0.259973	4.853	1.21608e-06	5.62516e-06	1.275	0.234697	5.43253	5.55595e-08	2.65145e-07	2.39273	5.70392	5.91352
miR-3662	6.81222	2.05419	0.321941	6.38064	1.76353e-10	1.38322e-09	2.00518	0.29167	6.87485	6.20568e-12	4.98523e-11	1.78272	7.17886	7.40943
miR-369	56.533	-1.53668	0.186497	-8.23972	1.72618e-16	2.7316e-15	-1.43995	0.164405	-8.75853	1.97805e-18	2.57681e-17	143.058	52.7671	49.5017
miR-375	10272.8	-3.5253	0.383339	-9.1963	3.70497e-20	9.03211e-19	-3.74389	0.338987	-11.0444	2.33441e-28	7.25926e-27	70819.4	5285.98	6150.73
miR-376a-1	6.92443	-1.48725	0.24356	-6.10629	1.01975e-09	7.41783e-09	-1.34604	0.212286	-6.34068	2.2875e-10	1.52079e-09	16.681	6.63629	5.90032
miR-376a-2	4.32916	-1.45147	0.277454	-5.23137	1.68262e-07	8.87558e-07	-1.19818	0.240749	-4.97686	6.46233e-07	2.66226e-06	9.8	4.32841	3.64401
miR-376c	35.7226	-2.03622	0.209664	-9.7118	2.68558e-22	8.97183e-21	-1.92017	0.18452	-10.4063	2.32088e-25	5.45689e-24	117.759	31.2081	28.7926
miR-377	21.9757	-1.62858	0.204979	-7.94507	1.94076e-15	2.65237e-14	-1.59476	0.180116	-8.85412	8.43448e-19	1.12928e-17	60.5257	20.0764	19.6364
miR-378a	7107.29	-2.28427	0.200856	-11.3726	5.72237e-30	3.44105e-28	-2.12334	0.177613	-11.9549	6.12304e-33	2.36105e-31	24723	5674.83	5075.49
miR-378c	55.5978	-2.49358	0.207813	-11.9991	3.58998e-33	3.23816e-31	-2.53851	0.183151	-13.8602	1.10314e-43	1.18159e-41	234.193	40.288	41.6049
miR-378d-1	2.11895	-2.72419	0.312732	-8.71095	3.0134e-18	5.78316e-17	-2.89885	0.267188	-10.8495	2.00543e-27	5.52353e-26	10.5306	1.39038	1.59864
miR-378d-2	2.67284	-2.61009	0.292733	-8.91627	4.82274e-19	1.01165e-17	-2.76211	0.251045	-11.0025	3.71832e-28	1.0862e-26	12.5515	1.82358	2.04631
miR-378i	0.658834	-3.87402	0.553617	-6.99765	2.60283e-12	2.52446e-11	-3.91432	0.471478	-8.30224	1.02166e-16	1.20107e-15	5.03539	0.27924	0.363479
miR-379	5418.14	-1.9444	0.203883	-9.53682	1.47285e-21	4.58107e-20	-1.8303	0.180289	-10.152	3.24534e-24	7.11024e-23	17018.4	4785.66	4421.78
miR-381	547.982	-3.52748	0.241561	-14.6029	2.69209e-48	2.42827e-45	-3.263	0.213517	-15.2822	1.00561e-52	1.38487e-50	3332.45	346.97	288.924
miR-383	1.31074	-3.15168	0.652866	-4.82746	1.38288e-06	6.20574e-06	-3.22747	0.567724	-5.68493	1.30867e-08	6.63975e-08	7.05492	3.59413	0.822794
miR-3922	5.26963	1.53117	0.213958	7.1564	8.28257e-13	8.58722e-12	1.49434	0.196854	7.59109	3.17237e-14	3.08905e-13	2.14983	5.66627	5.79455
miR-3928	5.32654	1.26206	0.209733	6.01745	1.77187e-09	1.22984e-08	1.26536	0.191693	6.601	4.08388e-11	2.89475e-10	2.18195	5.55403	5.48609
miR-3934	18.9907	1.09724	0.149143	7.35697	1.88129e-13	2.06942e-12	1.01703	0.133857	7.59784	3.01112e-14	2.96196e-13	9.47208	18.911	20.0212
miR-3940	6.71043	1.17052	0.24238	4.82925	1.37046e-06	6.1808e-06	1.04001	0.217947	4.77185	1.82543e-06	7.03885e-06	3.47022	6.98813	7.75677
miR-410	74.1121	-2.22955	0.2344	-9.51174	1.87501e-21	5.63754e-20	-1.98819	0.206823	-9.61298	7.04766e-22	1.2132e-20	257.902	64.8906	54.9631
miR-411	64.6409	-2.69146	0.233828	-11.5105	1.1686e-30	8.10829e-29	-2.36086	0.206119	-11.4539	2.24871e-30	8.02874e-29	270.256	52.7913	41.7938
miR-424	462.648	1.46214	0.177832	8.22205	2.00058e-16	3.11125e-15	1.5005	0.157368	9.53501	1.49873e-21	2.36848e-20	176.011	498.094	485.132
miR-431	58.0534	-1.26624	0.230839	-5.48538	4.1257e-08	2.34049e-07	-1.04376	0.203729	-5.12325	3.00317e-07	1.26976e-06	120.401	58.3829	50.1877
miR-432	37.9454	-1.38857	0.230759	-6.01739	1.77249e-09	1.22984e-08	-1.16122	0.203411	-5.70875	1.13808e-08	5.96256e-08	84.2267	37.5912	32.2214
miR-4326	24.6016	2.05891	0.30217	6.81373	9.51011e-12	8.93554e-11	1.948	0.269277	7.23419	4.68329e-13	3.92582e-12	6.78646	26.2654	28.3815
miR-433	4.03778	-1.61959	0.267679	-6.05048	1.44417e-09	1.0257e-08	-1.41885	0.231494	-6.1291	8.83767e-10	5.49646e-09	10.2643	3.82281	3.35837
miR-450a-1	18.7554	1.58865	0.195535	8.12465	4.48638e-16	6.74453e-15	1.71201	0.175632	9.74768	1.88735e-22	3.49885e-21	6.36187	20.706	19.0242
miR-450a-2	18.7162	1.66963	0.194108	8.60156	7.86403e-18	1.39085e-16	1.75793	0.174617	10.0674	7.70093e-24	1.57951e-22	6.0672	20.5126	19.3564
miR-450b	58.4441	1.03665	0.1641	6.31715	2.66423e-10	2.03655e-09	1.15734	0.145645	7.94629	1.92177e-15	2.01369e-14	28.4063	63.0757	58.071
miR-451a	4074.43	-1.03964	0.273205	-3.80534	0.000141609	0.000428628	-1.37175	0.241594	-5.67793	1.36338e-08	6.88112e-08	8699.61	3361.92	4232.13
miR-454	45.3558	1.17092	0.140309	8.34526	7.10574e-17	1.20932e-15	1.34071	0.125071	10.7196	8.23708e-27	2.14609e-25	19.1221	48.5239	43.1325
miR-455	1990.34	2.26621	0.178881	12.6688	8.807e-37	9.92989e-35	2.38418	0.158246	15.0663	2.69788e-51	3.25095e-49	410.773	2145.16	1976.71
miR-4652	16.3559	3.56683	0.353223	10.098	5.64074e-24	2.3127e-22	3.67295	0.322147	11.4014	4.11255e-30	1.41589e-28	1.42533	18.1834	16.9889
miR-4746	22.8901	1.6474	0.190372	8.6536	4.98995e-18	9.37694e-17	1.65242	0.170866	9.67084	4.01062e-22	7.02953e-21	7.59051	23.4582	23.1785
miR-4791	2.56319	-1.28143	0.278316	-4.60425	4.13951e-06	1.73667e-05	-1.13738	0.239131	-4.75629	1.97186e-06	7.51334e-06	5.03328	2.31729	2.09067
miR-486-1	541.472	-1.98913	0.239667	-8.29955	1.04511e-16	1.71397e-15	-2.34234	0.211905	-11.0537	2.10264e-28	6.75649e-27	1951.64	384.866	491.64
miR-486-2	536.146	-1.98171	0.238682	-8.30271	1.01765e-16	1.69985e-15	-2.32882	0.211033	-11.0353	2.5811e-28	7.77557e-27	1921.93	382.574	486.656
miR-487b	23.7878	-1.49073	0.193954	-7.686	1.51809e-14	1.92977e-13	-1.406	0.170403	-8.25103	1.57031e-16	1.80212e-15	59.1085	22.3183	21.1013
miR-495	34.5748	-1.9103	0.210552	-9.07283	1.1596e-19	2.68196e-18	-1.67708	0.18523	-9.05401	1.37809e-19	1.87109e-18	101.692	31.8294	27.279
miR-496	16.057	-1.16689	0.232382	-5.02144	5.12853e-07	2.54172e-06	-1.09132	0.204339	-5.34072	9.25783e-08	4.34877e-07	33.3079	15.7338	14.974
miR-497	50.1999	-1.04893	0.140738	-7.45308	9.11854e-14	1.05448e-12	-1.00359	0.123871	-8.1019	5.41067e-16	6.06499e-15	93.6486	46.9421	45.476
miR-499a	9.64284	-3.55525	0.480657	-7.39665	1.39666e-13	1.59466e-12	-3.20821	0.422204	-7.59872	2.9908e-14	2.96196e-13	58.4126	6.27411	4.95069
miR-503	42.5246	2.73055	0.228834	11.9324	8.01873e-33	6.18992e-31	2.75538	0.205335	13.419	4.68141e-41	3.22349e-39	6.73964	46.2746	45.5661
miR-516a-2	4.12377	2.2744	0.495133	4.59351	4.35843e-06	1.79958e-05	1.33323	0.444624	2.99856	0.00271258	0.00613832	1.48464	11.811	9.55775
miR-519a-1	6.61142	2.76879	0.490129	5.6491	1.6129e-08	9.82995e-08	2.05762	0.440031	4.67609	2.92395e-06	1.07174e-05	1.56582	12.8271	13.4973
miR-539	25.4311	-1.36961	0.228723	-5.98809	2.12321e-09	1.45086e-08	-1.14745	0.201277	-5.70086	1.19202e-08	6.15892e-08	54.2971	24.7286	21.1528
miR-548b	2.73704	-1.3118	0.297465	-4.40993	1.03403e-05	4.02022e-05	-1.47198	0.258469	-5.69498	1.23386e-08	6.32681e-08	6.21952	2.26377	2.46873
miR-550a-1	10.3259	1.24358	0.168843	7.36531	1.76737e-13	1.9681e-12	1.26247	0.153167	8.24247	1.68698e-16	1.91324e-15	4.44103	10.6996	10.3387
miR-550a-2	10.4378	1.23295	0.173719	7.09737	1.27158e-12	1.2744e-11	1.2584	0.157319	7.99899	1.25442e-15	1.34362e-14	4.59319	10.6833	10.3472
miR-5683	14.0878	-2.37686	0.398707	-5.96141	2.50071e-09	1.68331e-08	-1.21089	0.349809	-3.46158	0.000537014	0.00143402	35.0472	54.7157	74.1597
miR-585	2.45682	-1.4803	0.304124	-4.86742	1.13062e-06	5.25679e-06	-1.31409	0.261831	-5.01885	5.19807e-07	2.16924e-06	5.5856	2.25966	2.02864
miR-592	9.81783	1.58406	0.271773	5.82861	5.58913e-09	3.6269e-08	1.67998	0.244472	6.87189	6.33587e-12	5.04775e-11	3.03186	13.8271	9.09946
miR-615	10.5094	4.38667	0.367693	11.9302	8.23493e-33	6.18992e-31	4.48744	0.348746	12.8674	6.87084e-38	3.89617e-36	0.440122	11.3527	10.5639
miR-6510	81.0144	-1.99125	0.348112	-5.72015	1.06431e-08	6.53067e-08	-1.95916	0.307574	-6.36969	1.89406e-10	1.26921e-09	226.138	58.0581	56.784
miR-654	138.467	-1.75419	0.223979	-7.83195	4.80364e-15	6.37189e-14	-1.59742	0.197862	-8.0734	6.8369e-16	7.5756e-15	387.061	127.939	114.981
miR-655	13.8076	-1.46623	0.219672	-6.67462	2.47872e-11	2.17069e-10	-1.36611	0.192598	-7.09309	1.31154e-12	1.08062e-11	33.8939	13.1722	12.2116
miR-656	3.83511	-1.3605	0.236355	-5.75617	8.60449e-09	5.42745e-08	-1.16338	0.203586	-5.71445	1.10062e-08	5.82966e-08	8.47304	3.77214	3.2736
miR-676	2.42643	-1.38676	0.249499	-5.5582	2.72575e-08	1.60604e-07	-1.36649	0.21333	-6.40555	1.49833e-10	1.02439e-09	5.46268	2.11815	2.10255
miR-7-2	6.26064	1.46182	0.286052	5.11034	3.21584e-07	1.61149e-06	1.66971	0.257908	6.47404	9.54141e-11	6.66516e-10	2.27559	7.04188	6.01954
miR-7-3	5.968	1.58082	0.294603	5.36594	8.05288e-08	4.34952e-07	1.70305	0.266199	6.39766	1.57774e-10	1.07108e-09	2.11978	6.56447	6.02347
miR-767	198.263	5.26439	0.587204	8.96517	3.09798e-19	6.65328e-18	5.56503	0.52119	10.6776	1.29648e-26	3.20462e-25	4.97986	236.37	191.891
miR-7702	8.98697	1.3027	0.328508	3.96551	7.32402e-05	0.000232615	1.09614	0.29306	3.74035	0.000183767	0.000517986	3.97832	8.49568	9.83342
miR-7705	4.97434	1.79497	0.254247	7.05994	1.66572e-12	1.65107e-11	1.84936	0.233986	7.90374	2.70647e-15	2.80542e-14	1.54569	5.50013	5.29865
miR-877	11.7676	1.83952	0.222778	8.25717	1.49168e-16	2.40268e-15	1.94275	0.202215	9.60734	7.44493e-22	1.25911e-20	3.13797	12.1718	11.256
miR-885	4.88007	-2.91312	0.400644	-7.27109	3.56587e-13	3.87519e-12	-2.52991	0.347665	-7.27686	3.41692e-13	2.96748e-12	47.5905	3.12523	2.33861
miR-889	85.1307	-1.24048	0.176407	-7.03194	2.03688e-12	1.99703e-11	-1.0463	0.155649	-6.72219	1.79011e-11	1.3173e-10	174.321	84.2919	73.663
miR-9-1	6318.43	2.58604	0.389264	6.64341	3.065e-11	2.6583e-10	3.20652	0.344244	9.31465	1.22354e-20	1.87221e-19	731.108	6749.25	4390.04
miR-9-2	6332.08	2.58503	0.389199	6.64191	3.09652e-11	2.66006e-10	3.20535	0.344187	9.3128	1.24505e-20	1.87536e-19	732.997	6761.2	4398.28
miR-9-3	6324.98	2.58598	0.389617	6.63723	3.19638e-11	2.71994e-10	3.20279	0.344557	9.2954	1.46656e-20	2.17503e-19	733.224	6751.32	4402.54
miR-93	27210.9	1.07489	0.142746	7.5301	5.07034e-14	6.18033e-13	1.23252	0.126233	9.76392	1.60813e-22	3.03968e-21	12096.2	28423.3	25481.3
miR-937	17.6155	2.1682	0.270221	8.0238	1.0252e-15	1.45615e-14	2.21794	0.242612	9.14192	6.13515e-20	8.57142e-19	4.36302	19.6485	19.035
miR-944	945.346	1.16028	0.202185	5.73869	9.54092e-09	5.97633e-08	1.34782	0.178826	7.53703	4.80797e-14	4.58899e-13	407.357	1036.78	910.314
miR-95	36.7947	-1.08029	0.229897	-4.69903	2.61398e-06	1.13356e-05	-1.14421	0.202857	-5.64048	1.69574e-08	8.42627e-08	74.1917	33.6255	35.0847
miR-96	84.293	1.05597	0.184523	5.72273	1.04824e-08	6.47613e-08	1.42083	0.163526	8.68871	3.66583e-18	4.58943e-17	34.8055	92.9807	72.2089
miR-99a	2174.11	-2.26739	0.236243	-9.59768	8.17667e-22	2.63406e-20	-2.12285	0.208895	-10.1623	2.92138e-24	6.54933e-23	7202.38	1653.58	1495.98

## Sheet: KICH
DEMs	baseMean	log2FoldChange.early	lfcSE.early	stat.early	pvalue.early	padj.early	log2FoldChange.advanced	lfcSE.advanced	stat.advanced	pvalue.advanced	padj.advanced	Mean.HC	Mean.Early	Mean.Advanced
miR-1-1	20.611	-2.58596	0.292298	-8.84699	8.99094e-19	1.38668e-17	-1.94687	0.351894	-5.53254	3.15622e-08	2.63358e-07	49.4708	12.7702	8.33543
miR-1-2	21.2174	-2.50074	0.283807	-8.81139	1.23601e-18	1.86775e-17	-1.74744	0.340654	-5.12965	2.90284e-07	2.06661e-06	49.3081	14.5598	8.8453
miR-1180	74.9885	-1.08304	0.188714	-5.73908	9.51904e-09	5.15829e-08	-1.02939	0.228743	-4.50021	6.78859e-06	3.70982e-05	120.997	59.3464	56.7846
miR-1247	27.2477	-2.21025	0.551993	-4.00412	6.22499e-05	0.000218011	-1.76664	0.666655	-2.65	0.00804906	0.021916	60.7067	17.9582	13.1024
miR-1251	30.6247	-4.27862	0.4954	-8.63669	5.78669e-18	7.48537e-17	-5.78195	0.637778	-9.06577	1.23728e-19	3.42902e-18	100.547	1.82969	5.14293
miR-1258	14.7652	4.20952	0.426058	9.88016	5.07497e-23	1.04362e-21	3.83309	0.494272	7.75501	8.83337e-15	2.01609e-13	1.19146	16.5105	21.3835
miR-1269a	27.5957	-6.11413	0.484329	-12.6239	1.55849e-36	6.57847e-35	-5.40454	0.581788	-9.28954	1.54963e-20	4.73699e-19	96.0452	436.064	1.41514
miR-1269b	5.87136	-6.2103	1.14202	-5.43798	5.38891e-08	2.63531e-07	-6.69652	1.40573	-4.76372	1.90052e-06	1.16126e-05	21.1075	0	0.143591
miR-127	1080.38	-2.07842	0.240719	-8.6342	5.91394e-18	7.52854e-17	-1.39871	0.290603	-4.81311	1.48599e-06	9.15179e-06	2261.66	2978.82	535.304
miR-1287	71.6029	-1.32548	0.155652	-8.51569	1.65596e-17	2.0432e-16	-1.20255	0.18899	-6.36304	1.97794e-10	2.52222e-09	125.268	54.5571	49.8483
miR-130a	237.891	-2.49236	0.179147	-13.9124	5.32959e-44	3.56194e-42	-2.06996	0.21643	-9.56414	1.13137e-21	3.99063e-20	571.019	135.876	101.198
miR-133a-1	11.6633	-3.38136	0.324931	-10.4064	2.31881e-25	5.46966e-24	-2.3863	0.38396	-6.21498	5.133e-10	5.94509e-09	31.8533	6.09521	3.11147
miR-133a-2	10.4341	-3.22811	0.327654	-9.85218	6.70743e-23	1.2808e-21	-2.56052	0.393358	-6.50938	7.54626e-11	1.12613e-09	28.3119	4.83617	3.15176
miR-133b	3.59281	-3.6435	0.421095	-8.65244	5.04102e-18	6.73816e-17	-3.38334	0.530669	-6.37561	1.82236e-10	2.39687e-09	10.6694	1.02661	0.862605
miR-134	249.272	-2.20734	0.259402	-8.50933	1.74936e-17	2.12574e-16	-1.38997	0.312962	-4.44133	8.94058e-06	4.78475e-05	532.822	1063.28	115.233
miR-135a-1	19.3294	-1.77159	0.489814	-3.61687	0.000298183	0.000905845	-2.49635	0.598965	-4.16778	3.0758e-05	0.000153989	41.8955	7.39465	12.2542
miR-135a-2	23.5126	-1.89012	0.488052	-3.87278	0.000107603	0.000362594	-2.90381	0.598321	-4.85327	1.21445e-06	7.60011e-06	53.3974	7.10295	14.4055
miR-135b	16.4668	-4.6113	0.45701	-10.0901	6.10786e-24	1.32392e-22	-3.58596	0.543347	-6.59976	4.11827e-11	6.26623e-10	52.3467	4.37773	2.22298
miR-136	58.777	-2.68522	0.239748	-11.2002	4.06877e-29	1.12523e-27	-1.9613	0.288678	-6.79407	1.0901e-11	1.79983e-10	143.875	133.619	22.1074
miR-141	7708.36	2.779	0.357132	7.78144	7.17059e-15	7.18852e-14	1.77618	0.431188	4.11926	3.80086e-05	0.000186675	1714.06	5870.95	11765
miR-144	2264.92	1.49541	0.323979	4.61576	3.91657e-06	1.53224e-05	1.99203	0.391124	5.09309	3.5228e-07	2.39798e-06	879.965	3499.97	2480.64
miR-145	5385.25	-1.83285	0.200382	-9.1468	5.86448e-20	9.22219e-19	-1.51966	0.241942	-6.28108	3.36223e-10	4.01399e-09	10917.3	3807.57	3064.68
miR-1468	203.811	1.51951	0.252674	6.0137	1.81337e-09	1.01701e-08	1.3286	0.30492	4.35719	1.31743e-05	6.9546e-05	89.5217	224.905	256.752
miR-154	7.7209	-2.57317	0.292092	-8.80945	1.25759e-18	1.86775e-17	-2.04877	0.352898	-5.80557	6.41468e-09	5.92594e-08	18.9312	29.6937	3.03623
miR-15b	1422.06	1.51365	0.184475	8.20518	2.30237e-16	2.52945e-15	1.70319	0.222655	7.64943	2.01866e-14	4.35133e-13	584.385	1902.66	1668.36
miR-181c	233.405	-1.18565	0.179292	-6.61299	3.76632e-11	2.55982e-10	-1.12853	0.216795	-5.20552	1.93455e-07	1.42972e-06	390.909	178.519	171.669
miR-181d	40.7597	-1.44229	0.191915	-7.51527	5.67918e-14	5.06078e-13	-1.08934	0.232106	-4.69328	2.68864e-06	1.56871e-05	72.4611	33.8955	26.5152
miR-182	139128	3.54783	0.261147	13.5856	4.87582e-42	2.60694e-40	3.5598	0.315299	11.2902	1.46644e-29	8.7535e-28	15849.1	186901	185357
miR-183	40998.5	3.04359	0.255337	11.9199	9.31973e-33	2.87478e-31	3.13509	0.30828	10.1696	2.70958e-24	1.16813e-22	6432.56	56512.2	53039.3
miR-184	37.0476	-5.62817	0.457593	-12.2995	9.11098e-35	3.32136e-33	-4.44546	0.543386	-8.18103	2.81432e-16	6.82472e-15	125.639	5.71522	2.52306
miR-185	650.296	1.84332	0.127042	14.5094	1.05567e-47	9.40716e-46	2.12438	0.153036	13.8816	8.19228e-44	1.27144e-41	213.482	930.673	765.792
miR-187	1372.26	3.35678	0.403314	8.323	8.57611e-17	9.96817e-16	3.35855	0.486808	6.89914	5.2318e-12	9.22699e-11	178.182	1826.18	1823.87
miR-190a	47.1995	-2.09615	0.273855	-7.65424	1.94457e-14	1.90188e-13	-1.95686	0.332085	-5.89266	3.8002e-09	3.73286e-08	105.33	26.9003	24.4325
miR-192	13507	-3.58386	0.267016	-13.4219	4.50204e-41	2.25665e-39	-3.50277	0.322403	-10.8646	1.70001e-27	9.42291e-26	40166.9	3543.45	3349.84
miR-194-1	1991.04	-3.24848	0.264402	-12.2861	1.07537e-34	3.74976e-33	-3.01784	0.319286	-9.45181	3.33022e-21	1.12359e-19	5607.88	692.318	590.031
miR-194-2	2183.94	-3.29545	0.263523	-12.5054	6.97795e-36	2.66491e-34	-3.08105	0.318225	-9.682	3.59597e-22	1.3288e-20	6201.24	732.764	631.568
miR-195	124.915	-1.63219	0.177787	-9.18056	4.28838e-20	6.87857e-19	-1.30077	0.214883	-6.05339	1.41832e-09	1.5077e-08	237.29	96.3277	76.2719
miR-196a-1	736.139	-1.17601	0.307513	-3.82425	0.00013117	0.000432916	-1.32181	0.371383	-3.55917	0.000372033	0.00137475	1255.56	502.283	555.52
miR-196a-2	878.967	-1.15514	0.307355	-3.75832	0.000171055	0.000546557	-1.32134	0.371179	-3.55985	0.000371064	0.00137475	1490.78	596.574	669.242
miR-199a-1	2491.88	-3.03758	0.270275	-11.2388	2.62825e-29	7.52807e-28	-1.15923	0.326214	-3.5536	0.000380001	0.00139754	5732.71	2566.63	698.048
miR-199a-2	4194.67	-3.007	0.266403	-11.2874	1.51394e-29	4.49696e-28	-1.18154	0.321584	-3.67412	0.000238673	0.000944951	9654.19	4256.15	1200.82
miR-199b	5160.35	-2.96203	0.264739	-11.1885	4.64281e-29	1.24118e-27	-1.15727	0.319589	-3.62112	0.000293333	0.0011298	11778.1	5280.65	1511.42
miR-200c	23501.1	1.97166	0.357504	5.51508	3.48627e-08	1.78088e-07	1.00108	0.431641	2.31925	0.0203814	0.0467929	8712.92	17439	34173.9
miR-204	1485.01	-2.3488	0.53184	-4.41636	1.00376e-05	3.81525e-05	-6.31546	0.643934	-9.80763	1.04396e-22	4.05055e-21	3942.15	49.4657	773.752
miR-205	9.28181	-1.3045	0.445616	-2.9274	0.00341804	0.00859332	-1.40516	0.543306	-2.58632	0.0097008	0.0254318	41.1328	6.28375	20.7836
miR-206	24.3119	-4.47058	0.608249	-7.34992	1.98325e-13	1.63976e-12	-5.09957	0.753766	-6.76546	1.32887e-11	2.14834e-10	80.0511	2.39307	3.5487
miR-214	35.0876	-3.13151	0.258571	-12.1108	9.25562e-34	2.9692e-32	-1.96759	0.307882	-6.39075	1.65078e-10	2.20863e-09	90.3273	50.2971	10.2669
miR-215	73.2886	-1.8743	0.376468	-4.97864	6.40332e-07	2.80626e-06	-1.83517	0.455327	-4.03043	5.56742e-05	0.000263434	154.609	43.2039	42.1733
miR-216a	4.89433	-3.25952	0.593666	-5.49049	4.00817e-08	2.02173e-07	-2.06748	0.702191	-2.94433	0.00323658	0.0100063	12.9529	3.04238	1.31985
miR-216b	2.43075	-4.54749	0.697245	-6.52208	6.93387e-11	4.52111e-10	-4.04464	0.877362	-4.61	4.02672e-06	2.28083e-05	7.95896	0.448098	0.28831
miR-217	175.997	-3.35931	0.450355	-7.45926	8.70096e-14	7.50341e-13	-2.14821	0.54315	-3.9551	7.65032e-05	0.000347172	471.287	106.241	45.8412
miR-218-1	682.803	3.09858	0.329797	9.39543	5.69848e-21	9.52121e-20	2.45031	0.398018	6.15627	7.44775e-10	8.37602e-09	117.652	642.84	1007.32
miR-218-2	656.965	3.14302	0.32623	9.63434	5.7256e-22	1.02043e-20	2.52381	0.393688	6.41068	1.44872e-10	2.04401e-09	109.471	629.361	966.517
miR-22	858128	1.40272	0.0989044	14.1826	1.1745e-45	9.41948e-44	1.42651	0.119414	11.9459	6.82195e-33	6.61729e-31	389702	1.0475e+06	1.03037e+06
miR-221	8379.33	4.03465	0.173319	23.2788	7.26915e-120	2.91493e-117	3.90474	0.209174	18.6674	9.11681e-78	3.53732e-75	706.844	10590.1	11588
miR-222	2052.96	3.91197	0.154011	25.4006	2.48156e-142	1.99021e-139	3.6333	0.185612	19.5746	2.54392e-85	1.97409e-82	193.38	2400.78	2912.38
miR-299	3.53027	-2.18244	0.337826	-6.46024	1.04535e-10	6.65373e-10	-1.66765	0.407607	-4.09133	4.28913e-05	0.000208164	7.80976	22.1431	1.67797
miR-29a	77187.7	1.00566	0.16135	6.23279	4.582e-10	2.76298e-09	1.07829	0.194808	5.53514	3.10972e-08	2.63235e-07	44012.5	92934.2	88371.3
miR-29b-1	2959.62	1.05611	0.160617	6.57534	4.85416e-11	3.27146e-10	1.17477	0.193904	6.05855	1.37358e-09	1.48041e-08	1624.24	3667.31	3377.68
miR-3065	116.877	-2.78431	0.36479	-7.63265	2.29973e-14	2.22215e-13	-3.38265	0.442867	-7.63807	2.20497e-14	4.62447e-13	316.926	30.2759	45.8081
miR-30d	130838	1.32251	0.184645	7.16244	7.92533e-13	6.23149e-12	1.43144	0.222934	6.42091	1.35463e-10	1.98338e-09	61375.7	165540	153501
miR-3117	2.94949	-1.59898	0.39455	-4.05265	5.06405e-05	0.000182944	-1.97456	0.509086	-3.87863	0.000105047	0.000452867	6.0618	1.44494	1.91216
miR-3152	6.92495	5.26638	0.601716	8.75227	2.09109e-18	2.94297e-17	5.54072	0.67391	8.22176	2.00545e-16	5.02009e-15	0.195964	10.7828	8.90467
miR-3191	4.18098	2.85911	0.340488	8.39709	4.57675e-17	5.47844e-16	2.80997	0.376433	7.46471	8.34843e-14	1.66112e-12	0.706096	5.39641	5.54105
miR-326	15.0742	-1.07518	0.188417	-5.70641	1.15384e-08	6.21061e-08	-1.00357	0.231536	-4.33442	1.46148e-05	7.66288e-05	24.3292	11.9105	11.4199
miR-335	119.32	-1.55842	0.312184	-4.992	5.97563e-07	2.63322e-06	-1.51808	0.377406	-4.02241	5.76057e-05	0.000270921	228.308	79.8381	77.254
miR-337	30.4134	-2.22878	0.26705	-8.34594	7.06508e-17	8.33264e-16	-1.76128	0.322664	-5.45854	4.8006e-08	3.88048e-07	68.2108	132.867	14.3681
miR-3607	270.608	1.32463	0.225775	5.86702	4.43694e-09	2.45409e-08	1.09439	0.272543	4.01549	5.93235e-05	0.00027732	134.606	287.476	337.188
miR-3653	33.9373	1.2199	0.194014	6.28768	3.22246e-10	1.95789e-09	1.4745	0.231763	6.36212	1.98986e-10	2.52222e-09	16.5032	45.7337	38.2836
miR-369	11.1031	-2.16161	0.266083	-8.1238	4.51807e-16	4.83132e-15	-1.54126	0.319444	-4.82483	1.40124e-06	8.69891e-06	24.2332	39.5788	5.2474
miR-376c	7.04693	-2.68624	0.271516	-9.8935	4.44233e-23	9.37566e-22	-2.03652	0.324639	-6.27319	3.53735e-10	4.15907e-09	17.5679	32.2901	2.59383
miR-377	3.27937	-2.72487	0.285779	-9.53488	1.50064e-21	2.56066e-20	-1.93765	0.330648	-5.86016	4.62418e-09	4.43008e-08	8.19987	12.4466	1.14604
miR-379	749.004	-2.36098	0.239498	-9.85804	6.32707e-23	1.23764e-21	-1.56108	0.289082	-5.40013	6.65944e-08	5.11656e-07	1673.71	2982.04	325.63
miR-381	55.112	-1.8663	0.246808	-7.56176	3.97662e-14	3.70843e-13	-1.45715	0.298203	-4.88643	1.02682e-06	6.47817e-06	112.028	244.68	30.5246
miR-382	19.1394	-2.07993	0.265789	-7.82549	5.05691e-15	5.13372e-14	-1.23506	0.317904	-3.88502	0.00010232	0.000443577	39.5283	66.2208	9.20631
miR-411	8.83725	-2.43055	0.281134	-8.64551	5.35637e-18	7.04231e-17	-1.57253	0.332875	-4.7241	2.31141e-06	1.3692e-05	20.1717	29.4885	3.5839
miR-4461	9.67973	2.46122	0.283471	8.68244	3.87362e-18	5.2655e-17	1.90844	0.33616	5.67718	1.36931e-08	1.22136e-07	2.48414	9.27124	13.768
miR-4484	22.788	2.30265	0.317442	7.25379	4.05274e-13	3.25029e-12	1.53058	0.382714	3.99926	6.35397e-05	0.00029525	6.66639	19.3359	33.0506
miR-4501	17.0703	5.03396	0.414731	12.1379	6.65361e-34	2.22341e-32	4.29391	0.470735	9.12172	7.39443e-20	2.12521e-18	0.750081	15.9289	26.4363
miR-451a	5684	1.06367	0.318867	3.33579	0.000850579	0.00241902	1.25587	0.384985	3.26212	0.00110582	0.00377787	3062.35	7312.73	6400.66
miR-455	862.838	-3.25443	0.291181	-11.1767	5.30477e-29	1.37239e-27	-1.72895	0.351314	-4.92137	8.59406e-07	5.51156e-06	2190.13	660.611	229.41
miR-4661	29.507	2.3028	0.283328	8.12767	4.37622e-16	4.74288e-15	2.06852	0.339202	6.09818	1.0728e-09	1.17253e-08	7.97736	33.4006	39.5151
miR-4662a	470.899	2.18022	0.270284	8.06641	7.23983e-16	7.63993e-15	1.93302	0.326172	5.92637	3.09713e-09	3.08124e-08	138.326	528.186	626.737
miR-4732	9.40302	1.93326	0.383482	5.04132	4.62328e-07	2.10663e-06	2.51693	0.451916	5.56947	2.55521e-08	2.22791e-07	2.82281	15.4107	10.3672
miR-483	18.5607	-3.91907	0.447779	-8.75224	2.09164e-18	2.94297e-17	-3.44232	0.542101	-6.34997	2.15363e-10	2.65272e-09	56.4829	5.09559	3.80521
miR-485	3.73217	-2.07975	0.339706	-6.12221	9.22885e-10	5.32485e-09	-1.45229	0.405684	-3.57985	0.000343792	0.00128261	7.96894	22.124	1.79616
miR-486-1	1580.17	1.51377	0.324765	4.66112	3.14492e-06	1.24863e-05	2.13749	0.392049	5.4521	4.97788e-08	3.97083e-07	588.583	2589.15	1680.39
miR-486-2	1578.23	1.48441	0.324117	4.57986	4.6529e-06	1.81147e-05	2.12384	0.391267	5.42811	5.69533e-08	4.41958e-07	596.341	2598.57	1668.23
miR-487b	7.02003	-2.28015	0.303202	-7.52025	5.46726e-14	4.98266e-13	-1.3168	0.356615	-3.6925	0.000222058	0.000897485	15.3105	29.83	3.03049
miR-493	14.6216	-2.12151	0.280773	-7.55595	4.15822e-14	3.83321e-13	-1.41266	0.336686	-4.19579	2.71921e-05	0.000137915	31.1666	58.8389	6.96746
miR-495	8.19591	-2.14175	0.260371	-8.22576	1.93953e-16	2.16042e-15	-1.64343	0.314491	-5.22569	1.73509e-07	1.29464e-06	18.0258	21.1387	3.94518
miR-497	69.6847	-1.5848	0.185387	-8.54863	1.24559e-17	1.56089e-16	-1.39587	0.22469	-6.21243	5.21723e-10	5.95378e-09	132.466	50.3208	43.9833
miR-4999	13.3277	1.23748	0.256213	4.82988	1.36616e-06	5.73645e-06	1.24187	0.306701	4.04912	5.1411e-05	0.000246265	6.61161	15.8599	15.8768
miR-506	4.91868	-2.9129	0.514359	-5.66316	1.48612e-08	7.73942e-08	-2.90101	0.637159	-4.55304	5.28754e-06	2.95189e-05	13.2999	1.74282	1.74445
miR-508	269.27	-1.67886	0.40386	-4.15703	3.22417e-05	0.000118614	-2.18693	0.488097	-4.48052	7.44627e-06	4.01271e-05	560.043	122.967	174.851
miR-509-1	26.7302	-1.56267	0.414702	-3.76817	0.000164451	0.000527558	-1.97316	0.504604	-3.91032	9.21752e-05	0.000406409	53.3086	13.5509	18.0155
miR-509-2	26.7742	-1.47393	0.400445	-3.68073	0.000232569	0.000720154	-1.99657	0.48802	-4.09117	4.29204e-05	0.000208164	52.3576	13.0988	18.816
miR-509-3	30.8053	-1.59761	0.407911	-3.91657	8.98179e-05	0.000305229	-1.96165	0.49577	-3.95677	7.59686e-05	0.000346775	61.9173	15.8739	20.3885
miR-514a-1	65.0774	-2.62604	0.403085	-6.51484	7.27679e-11	4.70644e-10	-2.90534	0.489007	-5.94131	2.82753e-09	2.84956e-08	168.745	22.4926	27.2515
miR-514a-2	65.5769	-2.66582	0.398224	-6.69426	2.16761e-11	1.53843e-10	-2.87251	0.482934	-5.94804	2.71372e-09	2.8078e-08	170.733	23.3075	26.8045
miR-514a-3	65.1485	-2.57694	0.409468	-6.29339	3.10609e-10	1.90159e-09	-2.84448	0.496573	-5.72821	1.01497e-08	9.15831e-08	167.168	23.2518	27.9189
miR-514b	2.86254	-4.70656	0.710307	-6.6261	3.44669e-11	2.3626e-10	-5.28538	0.899682	-5.87472	4.23562e-09	4.10856e-08	9.75859	0.0893376	0.320431
miR-539	9.41092	-1.98781	0.29335	-6.77623	1.23354e-11	8.9126e-11	-1.28411	0.350839	-3.66011	0.00025211	0.000988067	19.2536	35.0598	4.80497
miR-550a-2	9.8004	1.45171	0.207081	7.01032	2.37776e-12	1.79903e-11	1.04512	0.250415	4.17354	2.99906e-05	0.000151121	4.63651	9.55156	12.715
miR-550a-3	4.70002	1.06718	0.259583	4.11112	3.93743e-05	0.000143537	1.00654	0.309817	3.24883	0.0011588	0.00392677	2.72916	5.09011	5.60153
miR-561	17.6103	2.72346	0.268461	10.1447	3.49889e-24	7.79476e-23	2.452	0.3165	7.74723	9.3917e-15	2.08227e-13	3.64421	20.0845	24.1248
miR-576	44.0886	1.22381	0.147552	8.29409	1.09419e-16	1.23597e-15	1.19561	0.176951	6.7567	1.41169e-11	2.23566e-10	22.5451	51.5343	52.5598
miR-582	5385.28	2.89229	0.204579	14.1377	2.2232e-45	1.62092e-43	2.83367	0.246956	11.4744	1.77408e-30	1.25153e-28	962.67	6862.38	7146.66
miR-584	231.34	1.28629	0.206639	6.22482	4.82111e-10	2.8641e-09	1.58431	0.249099	6.36018	2.01518e-10	2.52222e-09	106.791	319.976	260.493
miR-585	3.50625	-1.54987	0.320553	-4.835	1.33144e-06	5.62009e-06	-1.50776	0.401922	-3.75138	0.000175866	0.000725913	6.70594	2.36654	2.26281
miR-598	276.894	1.58459	0.190638	8.31201	9.40949e-17	1.07806e-15	1.17927	0.230139	5.12418	2.9883e-07	2.10811e-06	121.033	274.15	362.794
miR-615	34.4331	-1.66454	0.292417	-5.69235	1.25304e-08	6.6552e-08	-1.32656	0.353551	-3.75211	0.000175356	0.000725913	66.0503	26.4023	20.7415
miR-616	32.6939	2.15649	0.201155	10.7205	8.15394e-27	1.98165e-25	2.00229	0.239434	8.36259	6.13584e-17	1.58714e-15	9.60773	38.4984	42.717
miR-618	26.0744	3.16477	0.252867	12.5155	6.13968e-36	2.46201e-34	3.10674	0.295609	10.5096	7.8019e-26	3.56134e-24	3.8728	33.3622	34.9718
miR-651	85.2761	3.17395	0.325169	9.76091	1.65666e-22	3.01963e-21	2.94796	0.390487	7.54943	4.37151e-14	8.92709e-13	13.0123	100.738	117.827
miR-654	30.3652	-2.11657	0.275451	-7.68401	1.54188e-14	1.52665e-13	-1.4912	0.331847	-4.49363	7.00196e-06	3.79966e-05	64.7668	145.503	14.8319
miR-659	10.0655	1.14599	0.15317	7.48182	7.33007e-14	6.46013e-13	1.1556	0.180055	6.41802	1.38062e-10	1.98401e-09	5.22502	11.951	11.8765
miR-671	40.0392	1.35594	0.146125	9.27934	1.70528e-20	2.7911e-19	1.35995	0.174567	7.7904	6.67968e-15	1.57074e-13	18.6484	48.049	48.1822
miR-6715a	11.5323	3.52146	0.400332	8.79633	1.41359e-18	2.06127e-17	2.61824	0.473074	5.53452	3.12083e-08	2.63235e-07	1.5881	9.58933	17.7816
miR-675	245.654	-4.17567	0.306523	-13.6227	2.93596e-42	1.68188e-40	-3.72023	0.370319	-10.046	9.56512e-24	3.90659e-22	769.087	58.3324	42.6233
miR-6842	13.655	1.20098	0.192858	6.22726	4.74654e-10	2.84084e-09	1.08679	0.231052	4.70366	2.55535e-06	1.50224e-05	7.15504	15.1782	16.5254
miR-760	5.25567	1.17178	0.242022	4.84163	1.2878e-06	5.46465e-06	1.11718	0.287488	3.88601	0.000101904	0.000443577	2.74908	5.86645	6.35239
miR-7641-1	7.07071	5.25108	0.733975	7.1543	8.41017e-13	6.5485e-12	4.90611	0.847304	5.79026	7.02756e-09	6.41574e-08	0.265022	33.5624	17.0304
miR-7641-2	4.80066	5.20804	0.806046	6.46122	1.03863e-10	6.65373e-10	5.10838	0.937182	5.45079	5.01471e-08	3.97083e-07	0.109442	22.0103	11.0541
miR-766	77.1239	1.50104	0.189566	7.91832	2.40742e-15	2.47532e-14	1.1446	0.228749	5.00372	5.62335e-07	3.69807e-06	35.2527	77.8301	99.573
miR-874	1747.93	3.741	0.206732	18.0959	3.43095e-73	6.87906e-71	3.75014	0.249309	15.0421	3.88813e-51	7.54296e-49	175.025	2354.19	2339.19
miR-885	115.573	4.38275	0.424293	10.3295	5.18114e-25	1.18722e-23	4.35879	0.508851	8.56594	1.07197e-17	2.86844e-16	7.54171	154.708	157.27
miR-887	15.1521	-2.04376	0.233989	-8.73443	2.44897e-18	3.38633e-17	-1.56841	0.282763	-5.54674	2.91042e-08	2.50943e-07	32.1565	10.6777	7.85595
miR-888	466.097	7.19887	0.483064	14.9025	3.17348e-50	3.18142e-48	6.83499	0.578102	11.8232	2.96324e-32	2.55497e-30	4.71241	534.049	687.306
miR-890	34.3324	6.75281	0.613532	11.0064	3.55788e-28	8.91694e-27	6.52028	0.702088	9.28699	1.58714e-20	4.73699e-19	0.519547	42.0159	49.3683
miR-891a	92306.6	8.48337	0.438251	19.3573	1.76861e-83	4.72807e-81	8.07939	0.529062	15.2711	1.19073e-52	3.08001e-50	383.627	103757	137287
miR-891b	333.795	7.53595	0.497378	15.1514	7.42042e-52	8.50168e-50	6.97039	0.592039	11.7735	5.34409e-32	4.14701e-30	2.77799	344.065	509.23
miR-892a	1005.15	7.47583	0.4733	15.7951	3.36075e-56	5.39064e-54	7.08979	0.568503	12.471	1.07505e-35	1.19177e-33	8.39853	1139.12	1488.63
miR-892b	195.124	8.22776	0.532613	15.4479	7.79159e-54	1.04148e-51	7.85308	0.620412	12.6578	1.01235e-36	1.30931e-34	0.967592	222.606	288.696
miR-892c	82.9184	7.46281	0.564795	13.2133	7.35169e-40	3.46827e-38	7.00347	0.653031	10.7246	7.8056e-27	4.03809e-25	0.724186	90.4003	124.336
miR-934	14.4857	-6.81564	0.490233	-13.9029	6.08449e-44	3.75366e-42	-6.99161	0.654381	-10.6843	1.20535e-26	5.84594e-25	51.7088	0.32964	0.410532
miR-942	23.2706	1.27627	0.191645	6.65956	2.74653e-11	1.91541e-10	1.46125	0.228052	6.40755	1.47881e-10	2.04921e-09	11.2558	30.3122	26.7389
miR-95	7.24046	-1.62847	0.238448	-6.82946	8.52324e-12	6.21422e-11	-1.98332	0.309713	-6.40373	1.5163e-10	2.06429e-09	14.844	3.6365	4.67503
miR-96	182.107	3.29954	0.25468	12.9557	2.18246e-38	9.72408e-37	3.50097	0.305698	11.4524	2.28779e-30	1.47944e-28	23.5049	266.406	231.652

## Sheet: KIRC
DEMs	baseMean	log2FoldChange.early	lfcSE.early	stat.early	pvalue.early	padj.early	log2FoldChange.advanced	lfcSE.advanced	stat.advanced	pvalue.advanced	padj.advanced	Mean.HC	Mean.Early	Mean.Advanced
let-7e	3207.95	-1.14822	0.0993852	-11.5532	7.11185e-31	1.14884e-29	-1.40593	0.103964	-13.5233	1.14016e-41	1.95381e-40	6530.98	2464.34	2946.57
miR-1-1	17.0849	-1.78284	0.185202	-9.62644	6.18373e-22	6.41276e-21	-1.6834	0.194028	-8.67605	4.09758e-18	2.86072e-17	44.3899	13.7902	12.9114
miR-1-2	18.0602	-1.74852	0.184783	-9.46256	3.00485e-21	3.04105e-20	-1.6119	0.193518	-8.32946	8.1209e-17	5.51636e-16	45.829	14.9725	13.6169
miR-106b	783.378	1.1118	0.0525368	21.1624	2.12316e-99	3.63693e-97	1.24447	0.0549081	22.6646	1.00219e-113	1.88913e-111	373.817	886.389	807.978
miR-122	61.2536	6.38352	0.280087	22.7912	5.60154e-115	2.35265e-112	6.66967	0.287228	23.2208	2.80757e-119	1.05845e-116	0.781894	78.0289	63.9346
miR-1251	24.9139	-2.17637	0.291731	-7.46019	8.64003e-14	5.58279e-13	-2.43409	0.305559	-7.96604	1.63844e-15	1.05588e-14	82.6014	15.2577	18.2751
miR-125b-1	656.825	-1.20566	0.0964881	-12.4954	7.90941e-36	1.58188e-34	-1.08455	0.100933	-10.7452	6.24056e-27	6.44573e-26	1270.39	599.052	550.512
miR-125b-2	699.484	-1.14912	0.0947207	-12.1317	7.17603e-34	1.3104e-32	-1.03717	0.0990845	-10.4676	1.21739e-25	1.20778e-24	1315.65	641.108	592.968
miR-1269a	630.718	1.3407	0.454011	2.953	0.00314699	0.00740467	2.54653	0.474872	5.36255	8.20551e-08	2.91838e-07	175.227	1023.93	443.815
miR-1269b	46.7454	1.54621	0.663501	2.33037	0.0197864	0.0391072	3.4526	0.69363	4.97758	6.43856e-07	2.14808e-06	8.53821	93.4352	45.6004
miR-127	518.72	-1.17979	0.143293	-8.23341	1.81953e-16	1.50032e-15	-1.16133	0.149896	-7.74755	9.36824e-15	5.65092e-14	1013.15	595.898	447.113
miR-1270	45.1134	1.61094	0.162412	9.91889	3.44557e-23	3.85904e-22	1.89173	0.169403	11.167	5.91262e-29	6.85864e-28	14.8948	55.0323	45.3318
miR-1271	25.7491	1.36889	0.1395	9.81285	9.91328e-23	1.06758e-21	1.22584	0.14559	8.4198	3.77118e-17	2.58497e-16	11.1027	26.2094	28.9309
miR-129-1	8.85511	-3.81748	0.279322	-13.667	1.59953e-42	4.19877e-41	-4.26134	0.295515	-14.42	3.87139e-47	8.84554e-46	49.9389	2.61748	3.60801
miR-129-2	9.32964	-3.55404	0.281155	-12.6409	1.25682e-36	2.57495e-35	-4.02195	0.296949	-13.5443	8.56709e-42	1.50223e-40	49.8287	3.07572	4.23963
miR-133a-1	9.85911	-1.09099	0.184114	-5.9256	3.11167e-09	1.46843e-08	-1.03933	0.193025	-5.38444	7.26686e-08	2.63424e-07	18.3329	8.93418	8.48673
miR-133a-2	9.21388	-1.06361	0.181929	-5.84627	5.02718e-09	2.33306e-08	-1.10787	0.190993	-5.80055	6.60965e-09	2.52978e-08	17.2162	7.98782	8.11846
miR-135a-1	23.3347	-1.3646	0.252225	-5.41023	6.29432e-08	2.52978e-07	-1.77225	0.26433	-6.70471	2.01807e-11	9.88068e-11	54.3482	15.9443	21.1847
miR-135a-2	25.4915	-1.43605	0.256535	-5.59787	2.17005e-08	9.34789e-08	-1.85817	0.268809	-6.91258	4.75906e-12	2.44104e-11	61.6049	17.0183	22.8397
miR-136	36.4408	-1.43249	0.159891	-8.95918	3.27097e-19	2.95443e-18	-1.04931	0.167176	-6.27666	3.45927e-10	1.48198e-09	74.5707	36.2699	27.6594
miR-138-1	4.20788	-2.72244	0.330664	-8.23326	1.82181e-16	1.50032e-15	-2.24511	0.345692	-6.49453	8.32944e-11	3.82951e-10	15.1981	3.28399	2.32691
miR-138-2	3.07502	-2.36769	0.30101	-7.86583	3.66657e-15	2.72559e-14	-2.21092	0.316171	-6.99282	2.69422e-12	1.40099e-11	10.1756	2.28375	1.99103
miR-141	221.069	-2.1449	0.34114	-6.28743	3.22764e-10	1.60427e-09	-3.59703	0.357001	-10.0757	7.07571e-24	6.75327e-23	822.756	68.1127	186.21
miR-142	7581.18	1.71321	0.132556	12.9244	3.27813e-38	7.06059e-37	2.29225	0.138649	16.5328	2.13071e-61	7.65026e-60	2118.12	10375.3	6945.3
miR-144	1007.46	2.1124	0.187327	11.2765	1.71371e-29	2.44177e-28	1.38693	0.195942	7.07828	1.45953e-12	7.72903e-12	304.689	796.888	1317.68
miR-146b	1823.23	1.24155	0.166737	7.44615	9.61059e-14	6.16251e-13	1.69855	0.174396	9.73961	2.04345e-22	1.75087e-21	728.319	2363.96	1722.24
miR-149	30.3984	-1.60464	0.155276	-10.3341	4.93989e-25	6.01378e-24	-1.57674	0.162663	-9.6933	3.21941e-22	2.69715e-21	73.6076	24.8037	24.2311
miR-155	1560.3	3.20262	0.155597	20.5828	3.91018e-94	4.69221e-92	3.90851	0.162695	24.0235	1.57927e-127	1.19077e-124	151.657	2277.63	1396.16
miR-15a	360.381	1.17912	0.0559637	21.0693	1.52155e-98	2.13017e-96	1.07011	0.0584878	18.2963	8.8592e-75	6.67984e-73	175.534	368.217	397.123
miR-16-1	888.441	1.02956	0.0688265	14.9588	1.36549e-50	4.41158e-49	1.07104	0.0719698	14.8817	4.33067e-50	1.12597e-48	458.61	964.149	937.536
miR-16-2	893.779	1.03907	0.0694226	14.9673	1.20091e-50	4.03504e-49	1.07388	0.0725939	14.793	1.62559e-49	3.95385e-48	459.361	967.601	945.251
miR-181b-1	428.579	1.22269	0.0843545	14.4947	1.30925e-47	4.07323e-46	1.18242	0.0881958	13.4068	5.51976e-41	9.24866e-40	199.264	452.087	464.55
miR-181b-2	389.982	1.19319	0.089046	13.3997	6.06849e-41	1.37771e-39	1.16693	0.0931016	12.534	4.86572e-36	7.19363e-35	184.186	413.323	420.653
miR-184	8.27337	-2.56595	0.481401	-5.33017	9.81194e-08	3.85141e-07	-6.14222	0.519	-11.8347	2.58198e-32	3.29968e-31	38.6818	0.549702	6.48327
miR-188	11.7759	-1.97386	0.123226	-16.0183	9.52941e-58	4.00235e-56	-2.19946	0.130771	-16.8192	1.76394e-63	7.00006e-62	35.097	7.63294	9.18586
miR-199a-1	1235.49	-1.51863	0.134672	-11.2765	1.71505e-29	2.44177e-28	-1.08105	0.140863	-7.67449	1.66079e-14	9.93839e-14	2611.93	1234.75	911.522
miR-199a-2	2042.17	-1.47539	0.134792	-10.9457	6.96924e-28	9.14713e-27	-1.02229	0.14099	-7.25082	4.1427e-13	2.31378e-12	4207.99	2071.89	1513.31
miR-200a	764.404	-1.33213	0.112462	-11.8452	2.27763e-32	3.82643e-31	-1.61128	0.117661	-13.6942	1.09922e-42	2.07203e-41	1714.78	561.179	681.229
miR-200b	600.36	-1.44849	0.126097	-11.4871	1.53166e-30	2.42754e-29	-1.84897	0.131937	-14.0141	1.27842e-44	2.60521e-43	1456.51	404.312	533.932
miR-200c	1051.6	-2.79298	0.296436	-9.42187	4.43112e-21	4.37899e-20	-4.2183	0.310123	-13.602	3.89515e-42	6.99272e-41	4878.73	262.196	704.089
miR-203a	1549.76	-1.93225	0.181369	-10.6537	1.67586e-26	2.16573e-25	-1.85123	0.189716	-9.75787	1.707e-22	1.4794e-21	4353.98	1206.83	1140.98
miR-203b	16.8617	-2.38294	0.323865	-7.35781	1.86958e-13	1.15474e-12	-2.76729	0.339501	-8.15105	3.60782e-16	2.42883e-15	61.46	9.11172	11.8687
miR-204	1101.33	-1.45621	0.195947	-7.43168	1.0723e-13	6.77244e-13	-1.89961	0.204976	-9.2675	1.90555e-20	1.49665e-19	2708.81	725.841	987.138
miR-206	3.16179	-3.66073	0.302479	-12.1024	1.02514e-33	1.83217e-32	-4.49905	0.328332	-13.7027	9.77997e-43	1.89079e-41	17.8792	19.5166	1.38564
miR-20b	75.0422	-1.22141	0.14085	-8.67171	4.25671e-18	3.76382e-17	-1.34334	0.147471	-9.10912	8.30506e-20	6.38981e-19	154.424	60.8457	66.3525
miR-21	447190	2.02122	0.10167	19.8803	6.03256e-88	5.06735e-86	2.36218	0.106347	22.2121	2.62388e-109	3.95681e-107	109765	564356	445566
miR-210	7937.12	3.05256	0.128753	23.7087	2.93613e-124	2.46635e-121	3.06907	0.134668	22.79	5.76278e-115	1.44838e-112	1066.13	8946.98	8845.06
miR-214	21.7306	-1.50957	0.15215	-9.92158	3.35392e-23	3.80715e-22	-1.04825	0.158968	-6.59409	4.27883e-11	2.00387e-10	45.4954	22.0757	15.8494
miR-215	199.178	1.46616	0.196041	7.47882	7.4991e-14	4.92129e-13	1.82806	0.204968	8.91876	4.71549e-19	3.52028e-18	70.5885	250.854	195.21
miR-216a	4.16431	-1.15837	0.297998	-3.88716	0.000101423	0.000292766	-1.21193	0.312745	-3.87512	0.00010657	0.000285957	8.15641	3.52922	3.5841
miR-216b	1.56291	-3.29562	0.500633	-6.5829	4.61352e-11	2.3922e-10	-4.12474	0.532018	-7.75301	8.97404e-15	5.4568e-14	8.0213	0.550911	0.761211
miR-217	152.11	-1.45441	0.250571	-5.80439	6.45994e-09	2.96522e-08	-1.57815	0.262141	-6.02025	1.74146e-09	6.98437e-09	350.818	117.518	127.918
miR-224	88.4993	2.19385	0.15941	13.7624	4.29282e-43	1.20199e-41	2.78759	0.166248	16.7676	4.20877e-63	1.58671e-61	17.8198	123.386	81.629
miR-2355	170.484	1.51123	0.0780391	19.365	1.5238e-83	1.06666e-81	1.49983	0.0814737	18.4088	1.11677e-75	9.35609e-74	65.2131	184.478	185.951
miR-3065	77.0213	-1.08131	0.198238	-5.45461	4.90799e-08	2.02094e-07	-2.07451	0.207743	-9.9859	1.75692e-23	1.6559e-22	170.413	40.4625	80.4914
miR-30b	1720.75	-1.00758	0.111422	-9.04285	1.52641e-19	1.42465e-18	-1.14225	0.116555	-9.80006	1.12515e-22	9.98075e-22	3174.29	1438.3	1579.39
miR-3130-1	5.37788	1.39922	0.172845	8.09523	5.71579e-16	4.48716e-15	1.32631	0.179356	7.39484	1.41577e-13	8.27513e-13	2.25618	5.6401	5.93251
miR-3130-2	5.52183	1.3443	0.166562	8.07087	6.9799e-16	5.3301e-15	1.3963	0.172385	8.09987	5.50172e-16	3.67106e-15	2.21303	6.09313	5.8838
miR-323a	3.58296	-1.99216	0.243413	-8.18428	2.73943e-16	2.21261e-15	-1.09714	0.252407	-4.34669	1.38204e-05	4.13516e-05	8.56828	6.87013	2.14497
miR-323b	7.23779	-1.73142	0.227842	-7.59922	2.97918e-14	2.01816e-13	-1.09825	0.237642	-4.62144	3.81092e-06	1.19061e-05	16.2935	7.64954	4.9239
miR-335	74.537	-1.14929	0.169728	-6.77138	1.27558e-11	6.86851e-11	-1.09851	0.177592	-6.1856	6.18652e-10	2.57715e-09	141.945	66.3683	64.065
miR-33a	30.4585	-1.07176	0.165248	-6.48573	8.83003e-11	4.49529e-10	-1.2825	0.173209	-7.40437	1.31774e-13	7.82343e-13	58.7351	24.3372	28.1781
miR-33b	6.74039	1.24255	0.199592	6.22547	4.80104e-10	2.37228e-09	1.53177	0.206925	7.40253	1.33615e-13	7.87073e-13	2.72825	8.15563	6.71625
miR-342	367.591	1.02226	0.0899813	11.3608	6.55299e-30	1.00082e-28	1.21658	0.0940613	12.9339	2.89693e-38	4.64742e-37	182.901	425.064	371.627
miR-345	24.8788	-1.06666	0.0953134	-11.191	4.51125e-29	6.11201e-28	-1.07282	0.10014	-10.7132	8.82239e-27	8.9893e-26	45.9322	21.8635	22.1244
miR-3613	41.0353	1.56548	0.0937622	16.6963	1.3954e-62	6.16915e-61	1.80021	0.0972844	18.5046	1.89504e-76	1.78607e-74	13.985	49.0736	41.9024
miR-362	61.5406	-2.38531	0.140237	-17.0091	7.02755e-65	3.27952e-63	-3.08946	0.147418	-20.9571	1.61589e-97	2.03063e-95	232.904	27.3318	45.1131
miR-363	36.4086	-1.87338	0.134338	-13.9453	3.3608e-44	9.73474e-43	-1.96828	0.140906	-13.9687	2.4198e-44	4.8014e-43	102.868	26.2467	27.9764
miR-374c	7.30156	2.91049	0.383243	7.59437	3.09301e-14	2.0785e-13	2.89266	0.398263	7.26318	3.7808e-13	2.12741e-12	1.08979	8.10705	8.19866
miR-429	98.5379	-1.73907	0.133592	-13.0178	9.69479e-39	2.14306e-37	-2.09065	0.139967	-14.9367	1.90058e-50	5.118e-49	272.518	64.0042	81.7709
miR-451a	2960.4	1.69351	0.196879	8.60176	7.85023e-18	6.86895e-17	1.09893	0.205937	5.33623	9.48972e-08	3.31262e-07	1152.19	2467.93	3726.72
miR-452	168.771	1.85466	0.129299	14.344	1.16233e-46	3.48699e-45	2.11406	0.135056	15.6532	3.15717e-55	9.91877e-54	47.5656	206.125	172.038
miR-4677	17.0644	1.02002	0.0905539	11.2643	1.96955e-29	2.75737e-28	1.14275	0.0938342	12.1784	4.05375e-34	5.45808e-33	8.62944	18.9873	17.687
miR-4772	11.0153	1.96597	0.145937	13.4713	2.30727e-41	5.70033e-40	2.21752	0.150119	14.7718	2.22836e-49	5.25056e-48	2.92997	13.4846	11.2644
miR-500a	795.962	-1.52166	0.0982489	-15.4878	4.19144e-54	1.53079e-52	-1.81404	0.1028	-17.6463	1.08685e-69	5.85345e-68	1966.6	559.239	685.648
miR-500b	18.4635	-1.22601	0.109523	-11.1941	4.35741e-29	6.00036e-28	-1.41007	0.115489	-12.2096	2.76336e-34	3.78832e-33	38.5161	14.4323	16.5027
miR-501	194.641	-1.33248	0.104287	-12.7771	2.20263e-37	4.62552e-36	-1.54026	0.10918	-14.1075	3.41251e-45	7.35151e-44	431.263	148.187	171.759
miR-506	3.16422	-5.97939	0.333904	-17.9075	1.02992e-71	5.40708e-70	-6.08185	0.357489	-17.0127	6.61309e-65	3.32418e-63	23.8916	0.292057	0.322317
miR-508	119.865	-4.63459	0.209218	-22.152	9.98403e-109	2.79553e-106	-4.40243	0.218928	-20.1091	6.14847e-90	6.62278e-88	753.906	35.6835	30.4101
miR-509-1	9.60335	-3.54566	0.192546	-18.4146	1.00385e-75	5.62157e-74	-2.87963	0.200741	-14.345	1.14515e-46	2.53953e-45	44.636	6.12714	3.87999
miR-509-2	9.91602	-3.42454	0.185767	-18.4346	6.9355e-76	4.1613e-74	-3.02568	0.194526	-15.5541	1.4916e-54	4.49866e-53	46.2034	5.73207	4.3742
miR-509-3	11.4948	-3.70607	0.195597	-18.9475	4.63014e-80	2.99179e-78	-3.20128	0.204474	-15.6562	3.01543e-55	9.88538e-54	57.273	6.26487	4.45563
miR-514a-1	30.8067	-4.72495	0.231794	-20.3843	2.30451e-92	2.15087e-90	-4.28669	0.242473	-17.679	6.08228e-70	3.52772e-68	193.573	9.96254	7.35571
miR-514a-2	30.8896	-4.66958	0.239261	-19.5167	7.92051e-85	6.04839e-83	-4.25085	0.250306	-16.9826	1.10518e-64	5.20814e-63	192.39	10.1603	7.61162
miR-514a-3	30.8147	-4.72224	0.231584	-20.391	2.00885e-92	2.10929e-90	-4.2995	0.242279	-17.7461	1.84889e-70	1.26733e-68	193.817	9.89379	7.35904
miR-514b	1.89865	-6.0066	0.509396	-11.7916	4.31177e-32	7.10174e-31	-5.88319	0.53779	-10.9396	7.45588e-28	8.03104e-27	15.0378	0.108511	0.0797944
miR-532	2409.42	-1.208	0.0989647	-12.2063	2.87538e-34	5.61703e-33	-1.6486	0.10353	-15.9239	4.32487e-57	1.48225e-55	5223.5	1666	2261.51
miR-5586	7.21503	1.18629	0.167687	7.07444	1.50057e-12	8.69297e-12	1.67694	0.172858	9.70127	2.97756e-22	2.52256e-21	2.91041	9.34234	6.63917
miR-584	121.848	2.25776	0.106692	21.1614	2.16484e-99	3.63693e-97	1.87854	0.111399	16.8632	8.39137e-64	3.51505e-62	31.0113	114.15	148.536
miR-585	2.97424	-1.10744	0.178994	-6.18701	6.13157e-10	2.97718e-09	-1.2559	0.190365	-6.59734	4.18601e-11	1.97266e-10	5.7565	2.40211	2.72054
miR-592	63.57	3.05562	0.196157	15.5774	1.03696e-54	3.95931e-53	3.12551	0.204473	15.2857	9.52731e-53	2.76292e-51	8.37112	73.259	69.8272
miR-599	14.6897	3.70904	0.451956	8.20663	2.2748e-16	1.85517e-15	3.1457	0.47124	6.67536	2.46625e-11	1.19202e-10	1.46358	12.9053	19.0465
miR-616	14.0504	1.14489	0.138263	8.28048	1.22681e-16	1.06239e-15	1.32172	0.143633	9.20208	3.51076e-20	2.72898e-19	6.34725	15.9671	14.6181
miR-629	187.824	1.48415	0.0834773	17.7791	1.02669e-70	5.07305e-69	1.47441	0.0871877	16.9108	3.74543e-64	1.66121e-62	73.0202	203.018	204.37
miR-660	115.545	-1.50229	0.11104	-13.5293	1.05069e-41	2.67447e-40	-2.0642	0.116453	-17.7256	2.65835e-70	1.67033e-68	295.342	70.4951	104.285
miR-675	166.45	-1.21942	0.278545	-4.3778	1.19882e-05	3.98027e-05	-2.33036	0.291509	-7.99413	1.30492e-15	8.48201e-15	400.077	79.5902	171.726
miR-885	42.7813	3.79442	0.239852	15.8198	2.27118e-56	9.08473e-55	3.41337	0.249702	13.6698	1.53859e-42	2.82951e-41	3.79014	40.3198	52.7152
miR-934	1.93162	-5.63509	0.472117	-11.9358	7.7021e-33	1.32036e-31	-6.06347	0.499675	-12.1348	6.90571e-34	9.13492e-33	14.7976	0.0617998	0.222764

## Sheet: KIRP
DEMs	baseMean	log2FoldChange.early	lfcSE.early	stat.early	pvalue.early	padj.early	log2FoldChange.advanced	lfcSE.advanced	stat.advanced	pvalue.advanced	padj.advanced	Mean.HC	Mean.Early	Mean.Advanced
miR-1-1	15.1913	-2.57065	0.325867	-7.88863	3.05523e-15	3.56568e-14	-1.74091	0.369356	-4.71337	2.43659e-06	1.19699e-05	54.5355	16.2394	9.09374
miR-1-2	16.2125	-2.57201	0.320895	-8.01512	1.10027e-15	1.42518e-14	-1.73716	0.363703	-4.77633	1.78526e-06	9.01656e-06	57.9036	17.2956	9.64461
miR-106b	1841.42	1.08003	0.0993098	10.8753	1.51087e-27	8.50533e-26	1.11133	0.112455	9.88251	4.95773e-23	8.91399e-21	920.717	1989.29	1946.34
miR-10b	465666	-2.02356	0.224096	-9.02989	1.7184e-19	4.11126e-18	-1.98224	0.2538	-7.81027	5.70669e-15	1.28258e-13	1.39335e+06	352652	342695
miR-1247	17.0603	-2.77389	0.477206	-5.81277	6.14478e-09	3.41893e-08	-1.62331	0.540308	-3.00441	0.00266093	0.00733796	64.745	21.0004	9.46357
miR-1251	28.0319	-2.26486	0.38338	-5.90762	3.47089e-09	2.00099e-08	-2.46537	0.43538	-5.66257	1.49122e-08	1.11717e-07	99.0623	17.8924	20.5774
miR-126	7770.23	-2.26663	0.176827	-12.8184	1.29349e-37	3.31585e-35	-1.734	0.200268	-8.65844	4.78269e-18	2.04744e-16	24864.6	7474.63	5167.25
miR-127	834.074	-2.30912	0.244677	-9.43743	3.82021e-21	1.30569e-19	-1.44604	0.277112	-5.21825	1.80622e-07	1.06829e-06	2610.59	958.037	526.653
miR-1270	37.1331	1.07264	0.241241	4.44633	8.73485e-06	3.44002e-05	1.26287	0.272675	4.63143	3.63156e-06	1.7093e-05	18.2483	43.7463	38.4047
miR-129-1	12.2457	-3.5518	0.313356	-11.3347	8.82989e-30	7.04184e-28	-2.87536	0.356329	-8.06938	7.06538e-16	1.86817e-14	59.3824	8.1446	5.01002
miR-129-2	11.8302	-3.67746	0.316637	-11.6141	3.49441e-31	3.71572e-29	-3.03025	0.360304	-8.41026	4.09089e-17	1.56626e-15	59.7723	7.34505	4.59631
miR-1307	8470.89	1.24616	0.111478	11.1784	5.19909e-29	3.31702e-27	1.14713	0.126251	9.08611	1.02643e-19	5.42799e-18	3900.53	8638.48	9252.36
miR-133a-1	9.89299	-2.5968	0.328243	-7.9112	2.54919e-15	3.01182e-14	-2.39077	0.374259	-6.388	1.6807e-10	1.96227e-09	39.4818	7.50204	6.46226
miR-133a-2	9.00794	-2.56184	0.338085	-7.5775	3.52284e-14	3.54375e-13	-2.25444	0.385139	-5.85357	4.81134e-09	4.04242e-08	35.0037	7.32894	5.86214
miR-133b	1.99344	-3.00113	0.361477	-8.30239	1.02035e-16	1.57496e-15	-2.53855	0.417814	-6.07579	1.23375e-09	1.20559e-08	9.21278	1.54875	1.11757
miR-134	234.913	-1.86762	0.261908	-7.13083	9.97661e-13	8.30228e-12	-1.01982	0.296627	-3.43804	0.000585937	0.00188128	602.681	297.178	165.065
miR-135a-1	26.2808	-1.53902	0.311274	-4.94424	7.6441e-07	3.50019e-06	-1.93787	0.354096	-5.47273	4.43148e-08	2.99541e-07	66.3183	17.3225	22.8257
miR-135a-2	31.3831	-1.50549	0.313402	-4.80371	1.55753e-06	6.74459e-06	-1.86109	0.356164	-5.22537	1.73806e-07	1.03571e-06	77.9205	21.4509	27.4568
miR-135b	165.869	1.25663	0.220149	5.70809	1.14248e-08	6.07419e-08	1.43767	0.249158	5.77008	7.92327e-09	6.35984e-08	72.2749	195.877	172.695
miR-136	49.5661	-2.23462	0.247195	-9.03993	1.56772e-19	3.84694e-18	-1.54101	0.280142	-5.50081	3.7804e-08	2.63456e-07	152.19	52.2284	32.256
miR-139	296.697	-2.0411	0.232154	-8.792	1.46918e-18	3.19546e-17	-2.44785	0.263151	-9.30206	1.37755e-20	8.84587e-19	929.443	170.358	225.912
miR-141	400.589	-1.91556	0.462461	-4.14209	3.44151e-05	0.000126674	-1.31848	0.523772	-2.51729	0.0118263	0.027053	1152.62	462.215	498.5
miR-144	1550.24	1.21689	0.327098	3.72027	0.00019901	0.000652235	1.03082	0.37045	2.78262	0.00539212	0.013655	719.611	1470.31	1672.76
miR-145	3964.46	-2.57789	0.245694	-10.4923	9.37432e-26	4.7217e-24	-2.12468	0.278266	-7.63544	2.25047e-14	4.49593e-13	14945.1	3426.88	2502.99
miR-146a	758.974	1.58041	0.19001	8.3175	8.9837e-17	1.40941e-15	1.43458	0.215153	6.66773	2.59793e-11	3.43461e-10	268.834	726.607	803.911
miR-146b	3739.88	1.28863	0.218319	5.90249	3.58046e-09	2.0518e-08	1.40563	0.247249	5.68509	1.30742e-08	1.00459e-07	1480.27	3921.74	3616.32
miR-154	7.22015	-2.37728	0.267546	-8.88547	6.36504e-19	1.45032e-17	-1.78775	0.304827	-5.8648	4.49683e-09	3.85015e-08	24.2871	6.98396	4.59651
miR-155	1011.94	1.77074	0.226265	7.82597	5.03753e-15	5.60572e-14	1.98232	0.256205	7.73722	1.01614e-14	2.22808e-13	571.18	1256.84	1085.24
miR-181c	610.895	1.41304	0.176333	8.01348	1.11505e-15	1.42518e-14	1.05992	0.199688	5.30788	1.10905e-07	6.97229e-07	258.274	538.481	687.688
miR-181d	122.507	1.19694	0.185115	6.46592	1.00684e-10	6.73806e-10	1.15353	0.209494	5.50626	3.66527e-08	2.59455e-07	56.4107	125.417	129.202
miR-182	68526.1	2.07081	0.228982	9.04358	1.51627e-19	3.8186e-18	2.09634	0.259332	8.0836	6.28806e-16	1.76655e-14	18015.4	77038	75687.1
miR-183	23822.5	1.9858	0.227834	8.71597	2.88281e-18	5.8699e-17	2.12706	0.258031	8.24343	1.67343e-16	5.01472e-15	6554.06	28630.1	25959.6
miR-184	15.8501	-5.83937	0.380949	-15.3285	4.93383e-53	2.36084e-50	-4.29688	0.42968	-10.0002	1.52093e-23	4.55772e-21	124.607	6.29399	2.14733
miR-185	413.634	1.24854	0.142208	8.77968	1.63933e-18	3.48631e-17	1.14385	0.161	7.10462	1.20654e-12	2.00866e-11	185.195	408.998	440.048
miR-188	30.763	-1.22264	0.182132	-6.71294	1.90744e-11	1.39345e-10	-1.24904	0.207518	-6.01896	1.75546e-09	1.676e-08	63.5863	26.517	27.2026
miR-190a	57.0394	-1.01148	0.155185	-6.51789	7.13011e-11	4.87394e-10	-1.25229	0.176778	-7.08399	1.40058e-12	2.24843e-11	104.319	43.7221	51.7393
miR-195	110.929	-1.99965	0.192278	-10.3998	2.48484e-25	1.13238e-23	-1.67211	0.218016	-7.66966	1.72451e-14	3.60543e-13	322.127	100.978	80.4196
miR-196b	5114.85	1.47239	0.220332	6.68259	2.34751e-11	1.68915e-10	1.45811	0.249531	5.84339	5.11492e-09	4.2577e-08	1977.86	5434.16	5488.31
miR-199a-1	1387.82	-2.34318	0.264887	-8.84595	9.07555e-19	2.01984e-17	-1.5549	0.300002	-5.18295	2.184e-07	1.2586e-06	4392.69	1495.02	865.591
miR-199a-2	2152.42	-2.40479	0.265563	-9.05544	1.36015e-19	3.518e-18	-1.58081	0.300765	-5.25595	1.47262e-07	8.94517e-07	6974.86	2331.61	1317
miR-199b	2357.43	-2.50411	0.269978	-9.27524	1.77227e-20	5.65353e-19	-1.61066	0.305764	-5.26764	1.38187e-07	8.50893e-07	7909.57	2589.93	1394.14
miR-203a	2144.27	-1.68552	0.348282	-4.83953	1.30146e-06	5.71327e-06	-1.62425	0.394456	-4.11769	3.82682e-05	0.000151555	5593.51	7290.22	1738.92
miR-203b	23.6495	-1.75813	0.503183	-3.49402	0.000475814	0.00143645	-3.11038	0.572737	-5.43073	5.6124e-08	3.65619e-07	69.8132	8.10984	20.5968
miR-206	10.5436	-3.6252	0.346654	-10.4577	1.35098e-25	6.46444e-24	-3.19496	0.395557	-8.07712	6.6312e-16	1.8065e-14	48.2234	5.2287	3.88078
miR-21	2.04532e+06	2.91237	0.147317	19.7694	5.46707e-87	5.23198e-84	2.79315	0.166844	16.7411	6.57474e-63	5.91069e-60	297630	2.063e+06	2.24072e+06
miR-210	4174.22	1.94833	0.222676	8.74962	2.14063e-18	4.45345e-17	1.98871	0.252178	7.88612	3.11726e-15	7.57411e-14	1169.15	4640.33	4512.23
miR-214	31.6133	-2.52484	0.278017	-9.08161	1.06979e-19	2.84387e-18	-1.89594	0.31525	-6.01409	1.80902e-09	1.69408e-08	113.104	30.3632	19.5458
miR-216a	6.36276	-3.51237	0.558194	-6.29238	3.12632e-10	1.98139e-09	-1.96117	0.630812	-3.10897	0.00187743	0.00532433	29.0866	7.44234	2.49643
miR-216b	2.21456	-5.7409	0.564313	-10.1733	2.61022e-24	1.08608e-22	-5.33905	0.662025	-8.06473	7.33972e-16	1.88526e-14	18.6365	0.393082	0.272886
miR-217	200.742	-3.60859	0.414824	-8.69907	3.34603e-18	6.67115e-17	-2.13969	0.469757	-4.55489	5.24135e-06	2.42885e-05	959.509	217.706	78.568
miR-219a-1	21.6887	1.55233	0.150015	10.3478	4.28196e-25	1.86265e-23	1.05324	0.169458	6.21533	5.12154e-10	5.54731e-09	8.4788	17.6955	24.843
miR-223	971.548	1.55501	0.231887	6.70591	2.00162e-11	1.45117e-10	1.37214	0.262601	5.22521	1.73962e-07	1.03571e-06	369.95	957.727	1087.05
miR-299	3.49485	-2.04559	0.266755	-7.66843	1.74121e-14	1.82147e-13	-1.11101	0.302105	-3.67757	0.000235467	0.000821966	9.62671	4.40675	2.24992
miR-29c	8843.23	-1.39972	0.133344	-10.4971	8.91142e-26	4.7217e-24	-1.47117	0.151025	-9.74123	2.011e-22	2.25986e-20	20152.5	7268.45	7637.57
miR-30b	3528.25	-1.21383	0.128482	-9.44741	3.47312e-21	1.23103e-19	-1.39362	0.145532	-9.57601	1.00867e-21	9.0679e-20	7408.06	2819.52	3193.75
miR-31	366.284	2.33922	0.270945	8.63357	5.94644e-18	1.13815e-16	1.93616	0.306735	6.31217	2.75145e-10	3.09194e-09	85.7769	328.333	434.101
miR-3127	19.904	1.36611	0.137515	9.93426	2.95368e-23	1.13067e-21	1.27451	0.15417	8.26691	1.37478e-16	4.26183e-15	8.61072	20.6986	22.1613
miR-3170	21.2161	1.84487	0.22353	8.25334	1.54027e-16	2.33975e-15	1.32679	0.252288	5.25905	1.44801e-07	8.8555e-07	6.9749	17.6034	25.313
miR-323a	3.41381	-3.00229	0.299852	-10.0126	1.34228e-23	5.35235e-22	-2.22481	0.342279	-6.49999	8.03247e-11	9.89204e-10	14.8428	3.13364	1.83868
miR-323b	4.47961	-3.13286	0.343224	-9.12775	6.99384e-20	1.91232e-18	-2.39484	0.391011	-6.12473	9.08369e-10	9.07359e-09	19.6728	3.69721	2.2613
miR-337	36.7312	-1.76609	0.245732	-7.18706	6.6199e-13	5.65647e-12	-1.06347	0.278449	-3.81926	0.00013385	0.000485833	91.025	43.518	26.6996
miR-338	855.023	-1.52954	0.192804	-7.93315	2.13657e-15	2.6214e-14	-1.15923	0.218383	-5.30823	1.10693e-07	6.97229e-07	1907.53	854.085	660.68
miR-33a	62.7541	-2.7261	0.227254	-11.9958	3.73752e-33	5.10973e-31	-2.1614	0.257694	-8.38746	4.96738e-17	1.74182e-15	242.875	54.2778	36.6574
miR-34a	1820.15	1.75125	0.154756	11.3162	1.09108e-29	8.032e-28	1.10727	0.175264	6.31775	2.654e-10	3.02018e-09	637.689	1373.62	2146.64
miR-34b	5.31864	1.52449	0.369367	4.12729	3.67059e-05	0.000134075	1.9319	0.412705	4.68107	2.85386e-06	1.39436e-05	1.85207	7.0767	5.36745
miR-34c	30.7177	1.2591	0.312155	4.03357	5.49359e-05	0.000192578	2.10915	0.352207	5.98839	2.11931e-09	1.92451e-08	11.5491	49.7897	27.6474
miR-3614	6.10419	1.71955	0.289633	5.937	2.9028e-09	1.70428e-08	1.30976	0.325689	4.02151	5.78269e-05	0.000222164	2.16596	5.37617	7.15839
miR-362	160.194	-1.88702	0.231582	-8.14842	3.68722e-16	5.18922e-15	-2.28993	0.262666	-8.71801	2.83135e-18	1.27269e-16	476.669	97.419	128.943
miR-369	14.3707	-2.11661	0.257268	-8.22724	1.91581e-16	2.86473e-15	-1.43802	0.29196	-4.9254	8.41891e-07	4.45212e-06	41.9594	15.4226	9.5833
miR-376a-1	1.88434	-2.34536	0.333586	-7.03075	2.05421e-12	1.652e-11	-1.59868	0.381035	-4.19564	2.72105e-05	0.000110689	6.11257	2.005	1.14496
miR-376b	2.46758	-2.11539	0.300486	-7.0399	1.92382e-12	1.57358e-11	-1.56786	0.344747	-4.54785	5.41972e-06	2.48588e-05	7.63483	2.55796	1.69052
miR-376c	8.31729	-2.3169	0.273105	-8.48356	2.1841e-17	3.73248e-16	-1.54182	0.310023	-4.97326	6.58374e-07	3.56553e-06	26.8884	9.20065	5.27148
miR-377	3.52171	-2.51684	0.29759	-8.45742	2.73368e-17	4.51057e-16	-2.09819	0.342248	-6.13059	8.75515e-10	8.94419e-09	13.125	3.03895	2.22879
miR-379	669.421	-2.1397	0.249675	-8.56996	1.03521e-17	1.86924e-16	-1.12513	0.282764	-3.97903	6.91975e-05	0.00026138	1900.86	871.391	431.207
miR-3934	9.95713	2.20266	0.236434	9.31617	1.20611e-20	3.98017e-19	1.50546	0.265054	5.67983	1.3483e-08	1.02609e-07	2.58133	7.29328	11.7952
miR-411	9.17082	-2.2679	0.26957	-8.41304	3.99534e-17	6.48058e-16	-1.45772	0.305802	-4.76689	1.87094e-06	9.33757e-06	28.9254	10.4359	5.91403
miR-412	6.64393	-1.84399	0.328814	-5.608	2.04683e-08	1.07192e-07	-1.07251	0.372815	-2.87679	0.00401748	0.0105915	16.9125	8.01897	4.65245
miR-431	9.9496	-1.73633	0.226447	-7.6677	1.75105e-14	1.82147e-13	-1.06586	0.257158	-4.14475	3.40187e-05	0.000135322	24.5957	11.7079	7.33293
miR-432	9.01491	-1.65937	0.263348	-6.30108	2.95582e-10	1.88582e-09	-1.12328	0.299335	-3.75259	0.000175019	0.000624374	21.7607	9.92462	6.82276
miR-433	2.17564	-1.98567	0.27594	-7.19603	6.1989e-13	5.34446e-12	-1.56851	0.319593	-4.90783	9.20874e-07	4.84132e-06	6.30652	2.07688	1.60918
miR-4484	2.16303	-1.82194	0.345491	-5.27347	1.33867e-07	6.63785e-07	-2.46535	0.415456	-5.93408	2.95499e-09	2.63023e-08	5.9448	1.07692	1.68525
miR-4661	16.8009	1.00289	0.181729	5.51859	3.41724e-08	1.74882e-07	1.26456	0.204173	6.19358	5.88123e-10	6.29431e-09	8.41342	20.3406	17.0264
miR-4662a	65.6475	-1.57968	0.225932	-6.99181	2.71353e-12	2.16404e-11	-1.46689	0.256329	-5.72267	1.04863e-08	8.19756e-08	157.034	56.8061	52.533
miR-4668	19.0355	1.27324	0.17261	7.37638	1.62649e-13	1.49669e-12	1.19265	0.194355	6.13645	8.4387e-10	8.71999e-09	8.54804	19.5831	20.7152
miR-4677	29.6287	1.06335	0.108931	9.76173	1.64334e-22	6.04874e-21	1.28231	0.121779	10.5298	6.29653e-26	2.83029e-23	14.1347	34.504	29.8129
miR-4746	6.73038	1.55908	0.189963	8.20728	2.26256e-16	3.33118e-15	2.02685	0.205873	9.84514	7.19389e-23	9.23901e-21	2.27265	9.28014	6.72711
miR-4772	17.5622	1.35977	0.21981	6.18609	6.1675e-10	3.83266e-09	1.32246	0.247688	5.33923	9.33426e-08	6.03705e-07	7.42607	18.6859	19.1277
miR-483	6.25054	-1.30925	0.487395	-2.68622	0.00722665	0.0171186	-3.07104	0.564666	-5.43869	5.36745e-08	3.52214e-07	16.3095	2.66034	67.7453
miR-485	5.45672	-2.13722	0.269499	-7.93035	2.18523e-15	2.64718e-14	-1.46185	0.306731	-4.76592	1.87998e-06	9.33757e-06	16.5871	6.03181	3.69918
miR-487b	6.78877	-2.10584	0.262794	-8.01328	1.11691e-15	1.42518e-14	-1.27114	0.298095	-4.26421	2.00613e-05	8.3496e-05	19.3943	7.99084	4.4111
miR-489	8.79279	-3.11917	0.388928	-8.01991	1.05819e-15	1.40651e-14	-3.29776	0.445308	-7.40557	1.30588e-13	2.4458e-12	43.9655	4.49227	4.9885
miR-494	1.64942	-2.09723	0.318944	-6.57556	4.84719e-11	3.38596e-10	-1.52763	0.367059	-4.1618	3.15753e-05	0.000126645	5.01622	1.76626	1.13084
miR-496	2.67619	-1.93363	0.304508	-6.35	2.1532e-10	1.3923e-09	-1.09906	0.345621	-3.17996	0.00147296	0.0042854	7.09464	3.23719	1.8044
miR-497	61.558	-1.47269	0.180421	-8.1625	3.28153e-16	4.6872e-15	-1.20141	0.204756	-5.86749	4.4243e-09	3.83439e-08	137.698	59.7481	49.4838
miR-500b	47.1635	-1.08865	0.150193	-7.24833	4.2194e-13	3.70456e-12	-1.35118	0.171422	-7.8822	3.21656e-15	7.60971e-14	92.2988	35.9056	43.3294
miR-506	5.88842	-3.54157	0.54312	-6.52078	6.99448e-11	4.81562e-10	-3.79604	0.622227	-6.10073	1.05586e-09	1.0431e-08	31.7609	2.27513	2.72464
miR-508	249.398	-2.42746	0.389489	-6.23242	4.59284e-10	2.89168e-09	-2.94792	0.441321	-6.67977	2.39318e-11	3.21114e-10	921.723	119.467	171.348
miR-509-1	32.9221	-1.50564	0.406215	-3.70651	0.000210137	0.000681915	-1.99035	0.461171	-4.31585	1.58987e-05	6.77392e-05	77.1861	19.442	27.1983
miR-509-2	32.813	-1.50881	0.417751	-3.61174	0.000304147	0.000954325	-1.99777	0.474205	-4.21288	2.52138e-05	0.000103503	77.7882	19.4967	27.3491
miR-509-3	38.6729	-1.60839	0.408193	-3.94026	8.13929e-05	0.000277199	-2.0155	0.463177	-4.35145	1.35237e-05	5.84511e-05	96.3957	23.8581	31.6238
miR-513c	1.21405	-3.03165	0.657927	-4.60788	4.06796e-06	1.67803e-05	-3.29529	0.764988	-4.30763	1.65012e-05	6.96458e-05	5.58748	0.548484	0.681122
miR-514a-1	72.5721	-2.77097	0.360343	-7.68979	1.47375e-14	1.56709e-13	-2.99946	0.408745	-7.33822	2.16459e-13	3.89194e-12	297.9	37.2537	43.69
miR-514a-2	72.4124	-2.81163	0.363537	-7.7341	1.04138e-14	1.11978e-13	-3.06179	0.412386	-7.42458	1.13136e-13	2.16402e-12	301.209	36.0676	42.9459
miR-514a-3	72.4803	-2.78363	0.358188	-7.77142	7.76081e-15	8.43988e-14	-3.03867	0.406336	-7.47823	7.533e-14	1.47221e-12	297.559	36.2049	43.2627
miR-514b	3.30089	-4.05553	0.738228	-5.4936	3.93824e-08	1.99413e-07	-5.57882	0.863046	-6.4641	1.01901e-10	1.22146e-09	21.515	0.4363	1.29806
miR-539	7.23787	-2.20513	0.279963	-7.87653	3.36593e-15	3.83476e-14	-1.48323	0.318022	-4.66392	3.10248e-06	1.49677e-05	22.4011	7.97556	4.82699
miR-548b	2.07761	-1.76681	0.218144	-8.09928	5.52873e-16	7.55857e-15	-1.00732	0.249225	-4.04181	5.30393e-05	0.000205527	5.00844	2.54101	1.43049
miR-551b	39.6836	1.95252	0.329985	5.91699	3.27891e-09	1.91297e-08	1.33892	0.373411	3.58565	0.000336241	0.00113084	12.3147	31.1488	47.62
miR-5586	14.3075	1.46812	0.205001	7.16153	7.97817e-13	6.69747e-12	1.60372	0.229478	6.98857	2.777e-12	4.23139e-11	5.31151	16.1305	14.7144
miR-561	19.8425	2.85991	0.251406	11.3757	5.52611e-30	4.80771e-28	2.77812	0.279196	9.95042	2.51113e-23	5.64377e-21	2.99818	20.6422	31.4236
miR-577	66.5292	-1.11404	0.31523	-3.53404	0.000409255	0.00125935	-1.20267	0.357376	-3.36529	0.000764644	0.00239517	126.97	55.2483	58.7188
miR-584	285.323	2.1743	0.273858	7.93952	2.02964e-15	2.52255e-14	2.79796	0.309877	9.02928	1.7281e-19	8.63088e-18	62.2084	432.613	280.796
miR-589	400.827	1.36496	0.106529	12.813	1.38593e-37	3.31585e-35	1.01409	0.120614	8.4077	4.18135e-17	1.56626e-15	173.296	350.003	446.441
miR-592	132.481	3.10828	0.276037	11.2604	2.05876e-29	1.40731e-27	3.06981	0.311698	9.8487	6.94386e-23	9.23901e-21	17.3885	145.931	149.881
miR-599	44.462	4.39616	0.518781	8.47401	2.37085e-17	3.98054e-16	4.17244	0.583657	7.14879	8.75444e-13	1.48495e-11	2.47577	44.2264	51.6351
miR-616	20.4736	1.58913	0.189028	8.40687	4.21104e-17	6.7166e-16	1.92068	0.211204	9.09394	9.55143e-20	5.36671e-18	6.79357	25.5739	20.5985
miR-625	893.381	1.79915	0.154378	11.6542	2.18444e-31	2.61314e-29	1.65176	0.174781	9.45043	3.37445e-21	2.75785e-19	283.095	889.642	985.196
miR-6509	13.5878	1.77839	0.205076	8.67182	4.25255e-18	8.30549e-17	1.54055	0.229816	6.70339	2.03637e-11	2.77378e-10	4.46362	12.9794	15.3883
miR-651	18.4103	1.04294	0.14303	7.29173	3.0599e-13	2.74411e-12	1.03835	0.160913	6.45287	1.09753e-10	1.29826e-09	9.17046	18.9084	18.9719
miR-654	26.2879	-1.91244	0.235748	-8.11224	4.96964e-16	6.89267e-15	-1.26632	0.267325	-4.73699	2.16917e-06	1.07147e-05	71.7568	29.7667	18.9417
miR-671	37.9424	1.42718	0.124047	11.5052	1.24271e-30	1.18927e-28	1.30574	0.139502	9.35999	7.97433e-21	5.51455e-19	15.3732	38.008	41.5051
miR-6718	27.7332	2.60192	0.448805	5.79743	6.73379e-09	3.70359e-08	4.29932	0.504332	8.52479	1.53081e-17	6.25546e-16	3.24726	64.2608	19.7614
miR-675	86.4971	-1.45275	0.392081	-3.70523	0.000211198	0.000681915	-3.01272	0.445102	-6.7686	1.30035e-11	1.85558e-10	234.317	29.0155	260.835
miR-6892	14.5936	1.56788	0.214748	7.30104	2.85552e-13	2.6026e-12	1.52909	0.241081	6.34263	2.25869e-10	2.60328e-09	5.45539	15.7237	16.3196
miR-758	18.7198	-1.89045	0.251461	-7.51787	5.56746e-14	5.38188e-13	-1.01692	0.284818	-3.57042	0.000356415	0.00119114	48.2401	23.7844	12.9088
miR-760	5.93782	1.7548	0.232001	7.56376	3.91584e-14	3.86336e-13	2.0146	0.254033	7.93045	2.18357e-15	5.45287e-14	1.80254	7.3772	6.20242
miR-7706	8.53917	1.41568	0.173389	8.1648	3.21978e-16	4.66868e-15	1.31508	0.193156	6.80838	9.87051e-12	1.43122e-10	3.49551	8.70865	9.3439
miR-874	94.7556	-1.35188	0.235645	-5.73691	9.64217e-09	5.21331e-08	-1.48212	0.267278	-5.54524	2.93546e-08	2.12821e-07	205.631	73.6436	80.5503
miR-885	35.8067	3.40663	0.42362	8.04172	8.8585e-16	1.19403e-14	2.86162	0.477463	5.99339	2.05513e-09	1.88885e-08	4.10568	29.9397	43.7564
miR-891a	51.4603	-3.62974	0.523376	-6.93525	4.05517e-12	3.18098e-11	-4.93596	0.594941	-8.29656	1.07172e-16	3.56842e-15	320.609	368.422	469.072
miR-93	21404.8	1.50739	0.123071	12.2481	1.71924e-34	2.96374e-32	1.35195	0.139382	9.6996	3.02672e-22	3.02336e-20	8287	21153	23559.4
miR-935	6.88404	1.77198	0.365123	4.85311	1.21541e-06	5.38493e-06	2.49004	0.406553	6.12475	9.08278e-10	9.07359e-09	1.84503	10.4606	6.3283
miR-96	87.3291	1.69918	0.226818	7.49137	6.8158e-14	6.45814e-13	1.80683	0.256382	7.04741	1.82281e-12	2.87492e-11	28.4319	99.7784	92.5141

## Sheet: LIHC
DEMs	baseMean	log2FoldChange.early	lfcSE.early	stat.early	pvalue.early	padj.early	log2FoldChange.advanced	lfcSE.advanced	stat.advanced	pvalue.advanced	padj.advanced	Mean.HC	Mean.Early	Mean.Advanced
let-7c	11963.8	-1.0108	0.168199	-6.00956	1.86029e-09	1.03564e-08	-1.18974	0.192003	-6.19644	5.77542e-10	4.10014e-09	21746.7	9533.55	10792.4
miR-101-1	51854	-1.00016	0.130505	-7.66377	1.80551e-14	1.72163e-13	-1.10261	0.148973	-7.40144	1.34715e-13	1.58647e-12	93926.6	43739.4	46958.2
miR-103a-1	64651.7	1.18118	0.100482	11.7551	6.64514e-32	3.4189e-30	1.07002	0.114701	9.32878	1.07098e-20	2.82119e-19	31560.6	66260.1	71567.7
miR-103a-2	64748.2	1.17831	0.100248	11.7539	6.74044e-32	3.4189e-30	1.06594	0.114433	9.31499	1.21962e-20	3.0521e-19	31674	66310.8	71681.9
miR-105-1	93.3217	9.43334	0.728196	12.9544	2.21859e-38	2.02557e-36	10.1207	0.815957	12.4035	2.50147e-35	1.92613e-33	0.13839	150.332	93.3596
miR-105-2	93.0971	9.59242	0.733251	13.082	4.17095e-39	4.2312e-37	10.2825	0.821835	12.5116	6.44986e-36	5.38026e-34	0.121422	150.397	93.2124
miR-10b	87421.1	3.68468	0.233782	15.7612	5.75299e-56	2.62624e-53	3.60451	0.266861	13.5071	1.42056e-41	2.84395e-39	7720.58	93911	99277.7
miR-1180	109.619	1.69563	0.168538	10.0608	8.231e-24	2.03105e-22	2.14777	0.191833	11.1961	4.26185e-29	2.37006e-27	34.5017	152.777	111.692
miR-1226	6.40602	1.69615	0.246655	6.87661	6.12916e-12	4.58682e-11	2.18383	0.275141	7.93713	2.06916e-15	3.28766e-14	2.04182	9.11215	6.51381
miR-1251	7.25658	5.25897	0.56022	9.38732	6.15454e-21	1.30677e-19	5.02267	0.621428	8.08247	6.34687e-16	1.09538e-14	0.168144	7.58173	10.9437
miR-1258	11.9392	-3.32128	0.372015	-8.92781	4.34514e-19	7.3465e-18	-3.46459	0.428237	-8.09035	5.94921e-16	1.04476e-14	58.0433	5.25554	5.91256
miR-1266	32.2069	1.83222	0.199779	9.17125	4.67553e-20	8.89324e-19	2.46587	0.225932	10.9142	9.85738e-28	4.69868e-26	8.51945	46.8974	30.2734
miR-1269a	2926.64	5.87967	0.428203	13.731	6.61738e-43	8.63096e-41	5.91469	0.488616	12.105	9.93997e-34	7.10708e-32	55.7506	3363.34	3282.71
miR-1269b	469.999	6.71651	0.601223	11.1714	5.62851e-29	2.23428e-27	6.68716	0.684914	9.7635	1.61485e-22	5.05144e-21	5.17498	534.167	545.245
miR-1270	10.0608	2.31028	0.30054	7.6871	1.50511e-14	1.49366e-13	2.43976	0.338392	7.20987	5.60042e-13	6.17222e-12	2.19613	12.0409	10.9965
miR-1283-2	2.08296	3.95322	1.05582	3.74421	0.00018096	0.000514692	3.40811	1.19913	2.84214	0.00448118	0.0103595	0.113637	6.16629	5.78397
miR-1295a	11.2419	2.3445	0.380506	6.16154	7.20399e-10	4.24338e-09	2.06957	0.431777	4.79314	1.64195e-06	7.05404e-06	2.52905	10.5443	12.8013
miR-1301	50.4968	1.27715	0.14825	8.61483	7.0046e-18	1.06587e-16	1.76673	0.168279	10.4988	8.7496e-26	3.64931e-24	20.5989	70.1712	49.9827
miR-1323	8.09745	4.88902	0.823248	5.9387	2.87287e-09	1.52496e-08	5.08949	0.927636	5.48652	4.09925e-08	2.24227e-07	0.296529	44.6372	28.2549
miR-135a-1	14.5986	3.55829	0.406644	8.75038	2.12629e-18	3.34708e-17	3.50997	0.45784	7.66637	1.76933e-14	2.45986e-13	1.43312	16.368	16.9639
miR-135a-2	17.1641	4.32608	0.435453	9.93465	2.94205e-23	7.06865e-22	4.10343	0.488511	8.39986	4.47025e-17	8.28652e-16	1.06653	17.8928	20.9031
miR-135b	9.0857	1.00139	0.381035	2.62808	0.00858683	0.017697	1.19878	0.434068	2.76174	0.00574935	0.0129619	4.86954	17.2142	16.7296
miR-139	794.627	-1.41025	0.164733	-8.56084	1.1205e-17	1.62384e-16	-1.75437	0.18812	-9.32584	1.10109e-20	2.82614e-19	1840.98	545.857	692.885
miR-17	6439.73	1.09264	0.139233	7.84759	4.24121e-15	4.55555e-14	1.13144	0.158932	7.11899	1.08723e-12	1.1456e-11	3277.37	7180.14	6989.28
miR-182	43962.5	3.13054	0.267577	11.6996	1.28072e-31	5.56809e-30	4.02999	0.305436	13.1942	9.47418e-40	1.35481e-37	4482.82	73231.6	39258.7
miR-183	16861.9	3.62276	0.281255	12.8807	5.78085e-38	4.39826e-36	4.55678	0.321041	14.1938	1.00122e-45	5.01112e-43	1207.08	28409.6	14869.5
miR-184	46.4987	4.03496	0.445598	9.05516	1.36366e-19	2.44122e-18	3.96993	0.506006	7.84562	4.30803e-15	6.53384e-14	3.29614	131.538	79.4345
miR-18a	107.454	1.60839	0.186921	8.60465	7.65511e-18	1.14576e-16	2.03507	0.212917	9.55805	1.19996e-21	3.43188e-20	36.5184	149.592	111.231
miR-190b	5.42791	3.33637	0.36904	9.04067	1.55711e-19	2.73393e-18	3.01983	0.407164	7.41675	1.20026e-13	1.4652e-12	0.603281	5.07371	6.27198
miR-1911	5.48546	7.58673	0.860859	8.81297	1.21868e-18	1.95203e-17	6.83371	0.973229	7.02169	2.19208e-12	2.17254e-11	1.79231	5.42359	5.19245
miR-195	171.362	-1.20625	0.158351	-7.61757	2.58491e-14	2.33666e-13	-1.30987	0.181022	-7.236	4.62125e-13	5.19761e-12	335.056	134.918	145.092
miR-196a-1	23.7486	4.10583	0.543343	7.55661	4.13714e-14	3.66719e-13	3.97473	0.615859	6.45396	1.08964e-10	8.58841e-10	1.63579	48.4945	40.7685
miR-196a-2	26.1012	4.21056	0.54947	7.66295	1.81712e-14	1.72163e-13	4.07514	0.623023	6.54091	6.11461e-11	4.9762e-10	1.69261	53.9338	44.9578
miR-196b	377.767	3.46099	0.332658	10.404	2.37632e-25	7.48132e-24	3.23611	0.379462	8.52814	1.48716e-17	2.86278e-16	39.8397	375.485	438.844
miR-199a-1	3074.22	-1.07209	0.222657	-4.81498	1.47215e-06	5.60031e-06	-1.14052	0.254173	-4.4872	7.2167e-06	2.8553e-05	5731.19	2599.44	2725.8
miR-199a-2	4732.03	-1.15558	0.219749	-5.25862	1.45144e-07	6.37098e-07	-1.19695	0.25085	-4.77155	1.82814e-06	7.72138e-06	9161.49	3996	4112.33
miR-199b	5056.96	-1.27336	0.217773	-5.84718	4.99962e-09	2.5789e-08	-1.25647	0.248594	-5.05429	4.32004e-07	2.02073e-06	10291	4307.22	4257.16
miR-19a	286.015	1.42418	0.176727	8.05863	7.71573e-16	8.91705e-15	1.9771	0.201562	9.80893	1.03056e-22	3.43862e-21	105.048	413.62	281.764
miR-19b-2	557.395	1.02138	0.149461	6.83373	8.27338e-12	5.99492e-11	1.26408	0.170567	7.41108	1.25278e-13	1.51088e-12	284.574	683.744	577.592
miR-203b	4.78512	1.61154	0.546771	2.94737	0.00320486	0.00726063	2.35983	0.619734	3.80781	0.000140204	0.000430504	1.53999	28.2405	16.4327
miR-204	249.166	1.19729	0.279198	4.28831	1.80038e-05	5.93412e-05	1.15219	0.318672	3.61559	0.00029966	0.000871977	121.364	269.821	278.426
miR-205	12.9479	3.4704	0.574382	6.04198	1.52237e-09	8.57977e-09	3.32263	0.651135	5.10283	3.34607e-07	1.6103e-06	2.6981	13.8836	72.0552
miR-20a	3372.75	1.30547	0.157658	8.28043	1.22731e-16	1.60076e-15	1.45056	0.179958	8.06057	7.59384e-16	1.28838e-14	1473.94	4028.7	3642.93
miR-21	1.05629e+06	1.83135	0.121928	15.0199	5.43931e-51	1.65536e-48	1.88369	0.139182	13.5341	9.8412e-42	2.46276e-39	323488	1.19373e+06	1.1512e+06
miR-2114	15.0379	3.36721	0.397805	8.46447	2.57319e-17	3.55958e-16	2.90397	0.449577	6.45933	1.05164e-10	8.42157e-10	1.7664	18.5306	18.4697
miR-214	72.9873	-1.0499	0.224874	-4.66882	3.02928e-06	1.11074e-05	-1.06845	0.257047	-4.15662	3.22989e-05	0.000113842	132.472	62.9478	63.8518
miR-216a	243.317	3.81949	0.414451	9.2158	3.08978e-20	6.00205e-19	2.81022	0.472765	5.94422	2.77778e-09	1.79391e-08	21.8592	153.362	308.78
miR-216b	255.465	4.22953	0.444289	9.51978	1.7355e-21	3.89297e-20	3.36508	0.506702	6.64114	3.11257e-11	2.66297e-10	17.1507	176.77	321.91
miR-217	12312.8	4.40631	0.393545	11.1965	4.24399e-29	1.76126e-27	3.42617	0.449222	7.62691	2.40455e-14	3.25264e-13	751.684	8080.16	15939.5
miR-221	603.475	1.59111	0.142798	11.1424	7.79966e-29	2.96712e-27	1.60592	0.162938	9.85603	6.45523e-23	2.22817e-21	217.859	663.38	656.503
miR-222	154.206	1.35594	0.142445	9.51902	1.74821e-21	3.89297e-20	1.62306	0.162325	9.9988	1.54259e-23	5.71901e-22	61.8731	190.736	158.472
miR-224	825.18	3.23105	0.237339	13.6136	3.32427e-42	3.79382e-40	3.53319	0.270747	13.0498	6.37091e-39	7.97161e-37	92.4207	1070.31	868.014
miR-301a	42.1448	1.18594	0.148285	7.99773	1.26737e-15	1.44639e-14	1.74134	0.168162	10.3551	3.96653e-25	1.5882e-23	18.1475	60.5855	41.2189
miR-301b	7.62394	1.93411	0.245443	7.88005	3.27261e-15	3.55702e-14	1.90707	0.275797	6.91474	4.6873e-12	4.46856e-11	2.24502	8.33365	8.59042
miR-30d	69348.4	1.3015	0.13851	9.39644	5.64429e-21	1.22696e-19	1.29123	0.15811	8.16668	3.16995e-16	5.7693e-15	30734.7	75218.8	75756.4
miR-3127	14.5069	1.11868	0.146364	7.64312	2.12028e-14	1.93581e-13	1.68121	0.163998	10.2514	1.16608e-24	4.4894e-23	6.44815	20.3425	13.8393
miR-3200	18.372	2.49604	0.270736	9.21945	2.98624e-20	5.92703e-19	2.91698	0.305062	9.56192	1.15587e-21	3.40302e-20	3.37609	25.3685	18.9451
miR-323b	31.5643	1.22898	0.328512	3.74103	0.000183265	0.00051963	1.01148	0.374896	2.69804	0.00697484	0.0153446	15.6284	45.2177	36.7107
miR-338	2764.26	1.5012	0.215688	6.96004	3.40183e-12	2.60998e-11	1.28189	0.246204	5.20663	1.92301e-07	9.7219e-07	1109.03	2696.55	3139.28
miR-33b	43.3569	-1.60307	0.207575	-7.72286	1.13744e-14	1.15387e-13	-1.31428	0.237432	-5.53538	3.10562e-08	1.74266e-07	101.434	40.7954	33.3608
miR-34a	1709.76	1.45296	0.143639	10.1154	4.72041e-24	1.26757e-22	1.42653	0.163946	8.70123	3.28317e-18	6.57291e-17	683.825	1838.37	1872.2
miR-34c	12.0424	2.77335	0.295995	9.36959	7.28147e-21	1.5109e-19	3.80266	0.329053	11.5564	6.85404e-31	4.03582e-29	1.59088	46.1423	13.1988
miR-3591	14.232	2.30419	0.281165	8.19516	2.50255e-16	3.21807e-15	2.46339	0.317391	7.76139	8.4004e-15	1.21867e-13	3.17024	17.4322	15.6386
miR-3607	383.69	-1.61492	0.205859	-7.84479	4.33662e-15	4.60388e-14	-1.66173	0.235082	-7.06873	1.5636e-12	1.56516e-11	966.22	305.316	315.477
miR-3614	19.704	-1.05977	0.172417	-6.14656	7.91802e-10	4.57541e-09	-1.07975	0.198471	-5.44033	5.31826e-08	2.86214e-07	36.1416	17.1563	17.4198
miR-362	135.751	1.11416	0.145412	7.6621	1.82912e-14	1.72163e-13	1.03835	0.165906	6.25868	3.88255e-10	2.87884e-09	68.868	141.604	149.2
miR-3677	22.0132	1.55798	0.182714	8.52688	1.50342e-17	2.14472e-16	1.87934	0.206556	9.09846	9.16236e-20	2.13291e-18	7.54549	27.7914	22.1727
miR-3682	7.29534	1.14618	0.185999	6.16227	7.17113e-10	4.24338e-09	1.23928	0.209914	5.90373	3.5538e-09	2.25149e-08	3.3537	8.10826	7.67329
miR-372	11.6121	3.09231	0.520693	5.93884	2.8705e-09	1.52496e-08	3.05364	0.590219	5.17375	2.29444e-07	1.14837e-06	1.60296	974.542	84.1276
miR-373	4.68937	2.80992	0.708531	3.96584	7.3139e-05	0.000224183	2.7276	0.80305	3.39655	0.000682411	0.00183135	0.800034	67.3136	20.7661
miR-380	9.79892	1.19265	0.349142	3.41594	0.000635614	0.00164862	1.01362	0.398196	2.54552	0.0109116	0.0232889	4.8635	18.7608	14.648
miR-3923	9.16698	4.91226	0.651839	7.53601	4.84579e-14	4.25404e-13	5.46845	0.728464	7.50682	6.0579e-14	7.87527e-13	0.28997	111.935	71.1012
miR-409	207.159	1.11997	0.262145	4.27234	1.93436e-05	6.33001e-05	1.09537	0.299202	3.66098	0.000251257	0.000746314	105.139	266.933	253.897
miR-410	147.22	1.61202	0.28979	5.56273	2.65591e-08	1.29537e-07	1.23535	0.330744	3.73507	0.00018766	0.000570966	57.7676	254.321	176.668
miR-412	46.5967	1.07909	0.289648	3.72553	0.000194902	0.000550916	1.2343	0.330395	3.73585	0.000187085	0.000570951	23.5892	168.53	74.2518
miR-421	22.8771	1.14659	0.149862	7.65099	1.99432e-14	1.85797e-13	1.33818	0.169899	7.87632	3.37158e-15	5.19223e-14	10.661	26.8593	23.4965
miR-424	762.346	-2.32298	0.137715	-16.868	7.73198e-64	7.0593e-61	-2.11073	0.157268	-13.4212	4.5406e-41	7.57524e-39	2490.16	576.154	497.514
miR-431	93.1165	1.62165	0.290855	5.57547	2.46861e-08	1.21174e-07	1.64636	0.331794	4.96199	6.97762e-07	3.14622e-06	34.0735	260.353	165.885
miR-4326	26.351	1.60463	0.203175	7.89779	2.83895e-15	3.19995e-14	2.03331	0.230241	8.83122	1.0354e-18	2.15925e-17	8.95488	36.7416	27.3434
miR-450a-1	22.3346	-1.17371	0.136994	-8.56762	1.05647e-17	1.55573e-16	-1.06032	0.157902	-6.71506	1.87985e-11	1.68012e-10	43.2919	20.5244	19.1105
miR-450a-2	22.5819	-1.16963	0.139249	-8.39957	4.48122e-17	6.10649e-16	-1.12183	0.160598	-6.98534	2.84169e-12	2.78875e-11	44.251	20.0552	19.6165
miR-452	1234.32	2.41456	0.20591	11.7263	9.34996e-32	4.4929e-30	2.77721	0.234974	11.8192	3.10475e-32	2.0719e-30	235.02	1611.64	1253.35
miR-454	37.4547	1.0654	0.118011	9.02792	1.74969e-19	3.01409e-18	1.47755	0.133562	11.0627	1.90325e-28	1.00271e-26	17.9094	50.0826	37.6589
miR-4652	16.1801	6.90606	0.755212	9.14453	5.98894e-20	1.09358e-18	7.19102	0.847682	8.48316	2.19161e-17	4.13925e-16	0.0278134	21.8856	17.9604
miR-466	16.159	6.11914	0.798048	7.66763	1.75198e-14	1.70166e-13	5.63555	0.898338	6.27331	3.53455e-10	2.64036e-09	0.305214	37.8457	30.4164
miR-4661	33.5227	2.03147	0.219587	9.25134	2.21702e-20	4.49808e-19	2.1667	0.249172	8.6956	3.45001e-18	6.77148e-17	8.91178	39.9753	36.4673
miR-4746	15.766	2.52799	0.202234	12.5004	7.43181e-36	4.8466e-34	2.91908	0.224644	12.9942	1.31895e-38	1.46696e-36	2.89092	21.5943	16.3862
miR-483	1613.4	1.76734	0.457615	3.86208	0.000112427	0.00033005	2.48582	0.522351	4.75891	1.94639e-06	8.15204e-06	468.412	2624.17	1594.79
miR-485	52.8932	1.52303	0.311748	4.88546	1.03185e-06	3.97502e-06	1.24621	0.355709	3.50346	0.000459247	0.00127343	21.6291	69.779	82.3857
miR-490	7.18256	-3.40769	0.462111	-7.37417	1.6537e-13	1.38516e-12	-3.54755	0.532478	-6.66235	2.69484e-11	2.34569e-10	35.5843	2.98247	3.35653
miR-493	134.519	1.42318	0.293166	4.85452	1.20681e-06	4.61013e-06	1.2377	0.334584	3.69923	0.000216252	0.000652012	57.8743	180.592	177.199
miR-498	4.98303	5.18476	1.03904	4.98997	6.03887e-07	2.45044e-06	4.77693	1.17706	4.05836	4.94183e-05	0.000167121	0.0851799	20.3817	14.4591
miR-500a	1775.01	1.61463	0.124772	12.9406	2.65419e-38	2.20298e-36	1.67456	0.142399	11.7596	6.29964e-32	3.94121e-30	631.674	2016.47	1934.48
miR-500b	35.2365	1.2835	0.121445	10.5686	4.16876e-26	1.35931e-24	1.24526	0.137928	9.02828	1.74384e-19	3.96723e-18	15.7905	37.5192	38.5483
miR-501	298.225	1.48725	0.12692	11.718	1.03068e-31	4.70503e-30	1.52377	0.144745	10.5273	6.46724e-26	2.81465e-24	116.001	333.618	325.321
miR-508	28.0157	1.90569	0.274739	6.93637	4.02317e-12	3.03567e-11	2.07947	0.312309	6.65837	2.76873e-11	2.38923e-10	22.2685	316.129	54.8433
miR-511	68.7293	-1.19303	0.147422	-8.09262	5.83956e-16	6.92405e-15	-1.01492	0.168709	-6.01582	1.78979e-09	1.22711e-08	133.412	65.9837	58.4047
miR-512-1	22.0868	6.5985	0.816811	8.07837	6.564e-16	7.68324e-15	6.88765	0.919182	7.49324	6.71952e-14	8.37391e-13	0.262533	128.51	61.7939
miR-512-2	21.8585	6.43177	0.829616	7.7527	8.99558e-15	9.33291e-14	6.63227	0.934339	7.09835	1.26257e-12	1.29927e-11	0.298778	129.962	63.2987
miR-514a-1	5.77389	2.41254	0.344334	7.00638	2.4456e-12	1.90841e-11	2.13301	0.387332	5.50693	3.65137e-08	2.03057e-07	3.3322	67.656	7.93524
miR-514a-2	5.64156	2.05268	0.348727	5.8862	3.95175e-09	2.06168e-08	1.88541	0.393828	4.78741	1.68951e-06	7.22735e-06	4.31604	67.6557	7.57378
miR-514a-3	6.1177	2.29612	0.347753	6.60272	4.03675e-11	2.65147e-10	2.20775	0.391366	5.64113	1.68939e-08	9.71887e-08	3.98827	66.6154	8.11073
miR-515-1	3.38659	4.43107	0.944774	4.69009	2.73091e-06	1.01355e-05	4.34139	1.06874	4.06217	4.86197e-05	0.000164977	0.144772	26.4339	10.972
miR-515-2	3.96871	4.71277	0.963169	4.89298	9.93191e-07	3.8423e-06	4.43552	1.08995	4.06947	4.71203e-05	0.000160433	0.12418	26.9123	10.8415
miR-516a-1	15.1054	4.99201	0.761375	6.55657	5.50578e-11	3.51523e-10	5.16313	0.859542	6.00683	1.89182e-09	1.27953e-08	0.559026	117.518	47.4858
miR-516a-2	16.9129	4.95577	0.749735	6.61003	3.84238e-11	2.5421e-10	4.5492	0.84822	5.36324	8.17435e-08	4.30659e-07	0.700838	95.6309	41.0204
miR-516b-1	8.97815	5.75646	0.864561	6.65825	2.77111e-11	1.86031e-10	5.28999	0.975237	5.42432	5.81767e-08	3.11416e-07	0.195735	71.1382	36.4761
miR-516b-2	4.51283	4.57309	0.8857	5.16325	2.42694e-07	1.02583e-06	4.41409	1.00027	4.41292	1.01985e-05	3.89646e-05	0.206188	32.5807	16.1708
miR-517a	16.7698	2.84189	0.724072	3.92487	8.67773e-05	0.000262343	3.27781	0.824428	3.97587	7.01238e-05	0.000233202	2.53319	103.64	65.6391
miR-517b	16.6101	2.83452	0.723285	3.91895	8.89359e-05	0.0002671	3.24965	0.823539	3.94596	7.94805e-05	0.000256645	2.53319	102.536	65.293
miR-517c	8.16903	5.52203	0.898207	6.14783	7.85477e-10	4.56777e-09	5.21612	1.01405	5.14387	2.6914e-07	1.32064e-06	0.190235	28.8567	24.8667
miR-518a-1	5.94562	4.86953	0.942679	5.16562	2.39638e-07	1.01763e-06	5.46205	1.0648	5.12965	2.90286e-07	1.41057e-06	0.181384	34.7228	16.8639
miR-518a-2	6.3801	4.38201	0.946484	4.62977	3.66065e-06	1.32626e-05	4.70118	1.07024	4.39263	1.11989e-05	4.26241e-05	0.370579	35.6631	18.3226
miR-518b	25.3674	5.43304	0.756429	7.18249	6.8455e-13	5.53092e-12	5.15183	0.856083	6.01791	1.76684e-09	1.21973e-08	0.740913	142.942	76.3778
miR-518c	15.7398	4.00975	0.755908	5.30455	1.12952e-07	5.03048e-07	4.10076	0.858271	4.77794	1.77105e-06	7.51194e-06	1.15241	152.812	64.0843
miR-518e	11.5745	5.14029	0.862451	5.96009	2.52102e-09	1.37431e-08	5.75023	0.972872	5.91057	3.40922e-09	2.17365e-08	0.351386	73.6926	32.9173
miR-518f	13.0074	5.80351	0.856152	6.7786	1.2135e-11	8.45743e-11	6.21686	0.964793	6.44373	1.16574e-10	9.11649e-10	0.260875	86.4099	63.5245
miR-519a-1	40.5192	5.42988	0.707401	7.67581	1.64374e-14	1.61369e-13	6.20448	0.801084	7.7451	9.55045e-15	1.36572e-13	0.959528	366.113	129.863
miR-519a-2	20.8434	4.81597	0.771092	6.24564	4.2206e-10	2.56894e-09	5.89674	0.872069	6.76178	1.36309e-11	1.22924e-10	0.688532	152.792	76.2048
miR-519b	2.76799	4.60537	1.11741	4.12146	3.76475e-05	0.000120604	4.33312	1.26807	3.4171	0.000632909	0.00170307	0.024045	12.8528	8.22698
miR-519c	8.75716	5.69826	0.912713	6.24321	4.28677e-10	2.59194e-09	6.03125	1.03019	5.85448	4.78512e-09	2.9751e-08	0.121074	30.7618	30.3419
miR-519d	7.22251	5.13204	0.86339	5.94405	2.78056e-09	1.49333e-08	5.2203	0.973632	5.36168	8.24532e-08	4.32124e-07	0.225347	42.8601	29.7868
miR-520a	61.5983	5.52235	0.675891	8.17047	3.07183e-16	3.89525e-15	6.87308	0.765905	8.9738	2.86452e-19	6.37196e-18	1.16086	518.291	201.837
miR-520b	20.3792	5.67531	0.806501	7.03696	1.96484e-12	1.55991e-11	6.45118	0.908961	7.09732	1.27201e-12	1.29927e-11	0.4116	122.021	78.6161
miR-520c	6.612	5.48202	0.904621	6.06002	1.36103e-09	7.71812e-09	6.09632	1.02079	5.97217	2.34119e-09	1.5418e-08	0.0460641	27.0518	29.3684
miR-520d	5.97716	5.18289	0.907938	5.70842	1.14029e-08	5.72026e-08	4.91823	1.02559	4.79549	1.62276e-06	7.00164e-06	0.167846	27.1683	19.9674
miR-520e	6.86884	5.73513	0.961907	5.96225	2.48795e-09	1.36837e-08	5.4936	1.0876	5.05112	4.39221e-07	2.04493e-06	0.0502	19.6894	20.3189
miR-520f	12.9184	5.93894	0.916324	6.48127	9.09532e-11	5.72692e-10	6.79434	1.034	6.5709	5.00107e-11	4.17173e-10	0.21402	59.1518	53.3549
miR-520g	10.6284	5.7702	0.88369	6.52967	6.59135e-11	4.1791e-10	5.99034	0.996679	6.0103	1.85179e-09	1.26098e-08	0.245279	70.0012	41.5238
miR-520h	6.80661	5.45305	0.94461	5.77281	7.79604e-09	3.95433e-08	5.76239	1.06716	5.39972	6.6745e-08	3.55381e-07	0.111853	34.3398	23.194
miR-521-1	2.97436	4.09088	1.05248	3.88691	0.000101528	0.000301939	5.20186	1.19102	4.36756	1.25641e-05	4.7459e-05	0.0597538	18.0925	6.95561
miR-522	10.2658	5.30747	0.863069	6.14953	7.7714e-10	4.54826e-09	6.03891	0.972767	6.20797	5.36729e-10	3.83761e-09	0.265763	62.751	33.5404
miR-523	4.99937	4.43613	0.945407	4.6923	2.70153e-06	1.00673e-05	5.03291	1.0681	4.71204	2.45251e-06	1.0229e-05	0.221562	22.91	13.5912
miR-524	2.88867	4.42239	0.978474	4.51968	6.1932e-06	2.18316e-05	4.13282	1.10836	3.72878	0.000192411	0.000583648	0.0825509	10.714	8.60054
miR-525	18.8109	5.08186	0.837019	6.07138	1.26815e-09	7.23636e-09	5.03095	0.948161	5.30601	1.12051e-07	5.81156e-07	0.673388	67.3368	75.2311
miR-526b	68.1369	5.58748	0.667052	8.37637	5.45873e-17	7.32914e-16	5.52586	0.757769	7.29227	3.0477e-13	3.50661e-12	2.64921	341.991	287.411
miR-527	5.92516	4.7882	0.949442	5.04318	4.57865e-07	1.89154e-06	5.42852	1.07257	5.06122	4.16588e-07	1.97632e-06	0.229427	32.6352	16.8741
miR-532	6997.43	1.47132	0.116052	12.6781	7.82353e-37	5.49453e-35	1.2501	0.132471	9.43681	3.84306e-21	1.0397e-19	2873.72	6835.48	7967.89
miR-539	66.8528	1.44117	0.301617	4.77816	1.76911e-06	6.70205e-06	1.07116	0.344245	3.11162	0.00186063	0.00462155	29.3813	94.0365	93.0247
miR-541	6.32499	2.71985	0.421329	6.4554	1.07933e-10	6.7036e-10	2.84228	0.473556	6.00199	1.94908e-09	1.30942e-08	1.08751	32.4314	9.07205
miR-551b	37.3178	1.80011	0.415648	4.33085	1.48534e-05	4.94932e-05	1.70962	0.474037	3.60651	0.000310338	0.000900429	11.9973	39.2807	41.8213
miR-552	208.585	5.08225	0.489462	10.3833	2.95283e-25	8.69655e-24	3.67047	0.557873	6.57939	4.72374e-11	4.00717e-10	8.61484	365.928	384.77
miR-5586	14.864	1.22228	0.189335	6.45566	1.0775e-10	6.7036e-10	1.40167	0.214568	6.53249	6.4684e-11	5.22167e-10	6.57121	17.3669	15.3596
miR-5589	91.1075	-1.15824	0.312133	-3.71071	0.000206679	0.0005824	-1.36802	0.356576	-3.83653	0.000124784	0.00038552	182.399	70.7772	81.728
miR-589	453.081	1.57177	0.109803	14.3144	1.77822e-46	2.70585e-44	1.62049	0.125221	12.941	2.6407e-38	2.64334e-36	164.24	505.034	488.021
miR-653	50.8599	1.26538	0.236029	5.36111	8.27119e-08	3.73841e-07	1.53712	0.26898	5.71462	1.09946e-08	6.47389e-08	21.9317	88.5346	69.5544
miR-660	390.705	1.38467	0.11768	11.7664	5.81681e-32	3.31922e-30	1.17199	0.134286	8.72756	2.60221e-18	5.31594e-17	169.971	383.328	443.778
miR-6715b	9.60094	1.14495	0.299819	3.81881	0.000134097	0.000387438	1.1178	0.341482	3.27338	0.00106271	0.00271847	4.83055	17.1185	26.2818
miR-767	126.718	10.1213	0.690955	14.6483	1.3812e-48	3.15259e-46	10.5801	0.772609	13.694	1.10221e-42	3.67771e-40	0.130555	184.905	134.532
miR-7706	11.406	1.75756	0.165783	10.6016	2.93041e-26	9.90913e-25	1.98433	0.184607	10.7489	5.99405e-27	2.72729e-25	3.63351	14.1921	12.0727
miR-877	9.24609	1.7275	0.194744	8.87061	7.27449e-19	1.20757e-17	2.05611	0.217132	9.46941	2.81434e-21	7.82543e-20	2.86659	12.0825	9.552
miR-889	240.228	1.48037	0.298856	4.95346	7.29042e-07	2.86903e-06	1.01607	0.341139	2.97847	0.0028969	0.00693731	104.709	320.549	292.202
miR-891a	17.0453	4.65724	0.448039	10.3947	2.62052e-25	7.97511e-24	4.88049	0.49941	9.7725	1.47755e-22	4.77105e-21	0.754241	93.4225	82.0664
miR-9-1	1248.21	3.06658	0.303809	10.0938	5.88611e-24	1.53543e-22	3.18255	0.346728	9.17883	4.35787e-20	1.06396e-18	168.612	2909.35	1799.26
miR-9-2	1351.88	3.19188	0.310441	10.2818	8.51502e-25	2.35582e-23	3.14345	0.354303	8.87222	7.17007e-19	1.52707e-17	173.17	2918.5	1801.95
miR-9-3	1253.05	3.05703	0.303843	10.0612	8.19641e-24	2.03105e-22	3.16362	0.346767	9.12319	7.29467e-20	1.73856e-18	170.693	2909.53	1807.56
miR-92b	83.2365	1.00758	0.205516	4.90269	9.45333e-07	3.67272e-06	1.46601	0.234294	6.25711	3.92176e-10	2.88653e-09	40.7259	112.307	81.6853
miR-93	27318.1	1.67517	0.11537	14.5199	9.05792e-48	1.65398e-45	1.98662	0.131693	15.0853	2.02382e-51	2.02584e-48	8995.17	35648.4	28726.4
miR-937	12.1225	1.62916	0.226671	7.18736	6.60573e-13	5.38485e-12	1.58562	0.256755	6.17562	6.59046e-10	4.64581e-09	4.34779	17.9126	13.3137
miR-944	9.58794	1.1484	0.296653	3.87119	0.000108307	0.000321051	1.91212	0.335639	5.69694	1.21973e-08	7.14008e-08	3.8575	14.5722	10.799
miR-96	59.4785	3.69216	0.299712	12.319	7.15677e-35	4.35608e-33	4.2535	0.339115	12.5429	4.34567e-36	3.95456e-34	4.57518	87.1372	59.0333

## Sheet: LUAD
DEMs	baseMean	log2FoldChange.early	lfcSE.early	stat.early	pvalue.early	padj.early	log2FoldChange.advanced	lfcSE.advanced	stat.advanced	pvalue.advanced	padj.advanced	Mean.HC	Mean.Early	Mean.Advanced
let-7a-1	52833.4	-1.72355	0.125979	-13.6812	1.31482e-42	4.5449e-41	-1.49391	0.142429	-10.4888	9.72796e-26	2.01559e-24	142461	50580.7	43137.6
let-7a-2	52813.7	-1.72192	0.125883	-13.6788	1.3601e-42	4.54975e-41	-1.49251	0.14232	-10.487	9.91275e-26	2.01559e-24	142293	50570	43135.5
let-7a-3	52963.3	-1.7197	0.125542	-13.6981	1.04151e-42	3.72431e-41	-1.49	0.141935	-10.4978	8.84374e-26	1.87641e-24	142517	50737.8	43270
let-7b	76023.7	-1.57564	0.12638	-12.4675	1.12303e-35	2.5317e-34	-1.53166	0.142882	-10.7197	8.22305e-27	1.82402e-25	192993	66750.2	64745.8
let-7c	6397.21	-2.00559	0.145682	-13.7669	4.03422e-43	1.4941e-41	-1.85081	0.164709	-11.2368	2.68851e-29	6.55997e-28	20171.7	5591.55	5022.75
let-7d	3201.02	-2.45521	0.115525	-21.2526	3.11929e-100	3.23471e-97	-2.3998	0.130627	-18.3713	2.22938e-75	1.08794e-72	12753.3	2414.31	2323.3
let-7e	6712.74	-1.23103	0.14195	-8.67227	4.23588e-18	4.06723e-17	-1.10993	0.160487	-6.91603	4.64474e-12	3.77772e-11	13979	6476.8	5955.43
let-7f-1	27666.4	-1.92093	0.169956	-11.3025	1.27532e-29	2.44908e-28	-1.67714	0.192149	-8.72834	2.58428e-18	3.19273e-17	82665.7	25849.8	21830.9
let-7f-2	27923.1	-1.91794	0.16983	-11.2933	1.41573e-29	2.6693e-28	-1.6753	0.192006	-8.72528	2.65524e-18	3.1994e-17	83314.8	26086	22047.9
miR-1-1	33.9207	-2.24113	0.230861	-9.70767	2.79658e-22	3.58032e-21	-2.31786	0.26189	-8.8505	8.71249e-19	1.11887e-17	123.44	24.832	26.2013
miR-1-2	35.5902	-2.27667	0.229486	-9.92075	3.38205e-23	4.67625e-22	-2.40279	0.26037	-9.22839	2.74739e-20	4.06281e-19	132.436	25.0932	27.4063
miR-101-1	27082.6	-1.13946	0.130443	-8.73531	2.4298e-18	2.35487e-17	-1.25971	0.147477	-8.54174	1.32219e-17	1.44995e-16	55052.9	22992.5	24991.2
miR-101-2	27267.2	-1.15229	0.131105	-8.78907	1.50802e-18	1.47529e-17	-1.27265	0.148225	-8.58595	9.00851e-18	1.01061e-16	55842.7	23114	25125.3
miR-105-1	129.807	6.90247	0.7284	9.47621	2.63687e-21	3.17957e-20	7.1715	0.814674	8.80291	1.3331e-18	1.68974e-17	1.19405	164.415	136.38
miR-105-2	130.013	6.85232	0.7288	9.4022	5.34354e-21	6.36926e-20	7.11539	0.815358	8.72671	2.62183e-18	3.19863e-17	1.20641	164.084	136.702
miR-106a	65.73	1.32413	0.219931	6.02065	1.73722e-09	9.73782e-09	1.50452	0.247352	6.08251	1.18314e-09	7.59698e-09	26.1463	76.6721	67.5969
miR-1226	7.93973	-1.18724	0.223923	-5.302	1.14539e-07	5.27896e-07	-1.32155	0.255275	-5.17698	2.25507e-07	1.106e-06	19.9532	6.54743	6.99406
miR-1247	116.66	-2.29701	0.256474	-8.95612	3.36308e-19	3.44382e-18	-2.46681	0.290237	-8.49929	1.90757e-17	2.04592e-16	441.507	79.4771	89.5269
miR-1251	3.98174	2.27387	0.491191	4.62929	3.6692e-06	1.43044e-05	1.76519	0.5453	3.2371	0.00120753	0.00330126	0.936779	7.96825	6.77587
miR-1258	3.50154	-1.5173	0.243033	-6.24319	4.28747e-10	2.54063e-09	-1.58463	0.279568	-5.66813	1.44363e-08	8.23969e-08	8.55478	3.03365	3.05418
miR-125a	3164.39	-1.45566	0.107787	-13.505	1.46128e-41	4.59195e-40	-1.5016	0.121873	-12.3211	6.9761e-35	3.09485e-33	7640.74	2694.24	2781.35
miR-1269a	608.62	5.70008	0.529175	10.7716	4.68567e-27	8.23566e-26	6.73123	0.596402	11.2864	1.53184e-29	3.93441e-28	25.2343	1105.45	541.018
miR-1269b	33.6784	6.00135	0.861197	6.96862	3.20072e-12	2.25792e-11	4.78708	0.963158	4.9702	6.6885e-07	3.06478e-06	0.613262	40.2177	68.9288
miR-1277	5.14867	1.95562	0.290692	6.72748	1.72627e-11	1.16243e-10	1.97462	0.314373	6.28115	3.36085e-10	2.34299e-09	1.35677	5.66602	5.41256
miR-1296	21.2758	-2.1798	0.175577	-12.415	2.1659e-35	4.77881e-34	-2.145	0.200025	-10.7237	7.87914e-27	1.78838e-25	79.359	16.4348	16.0705
miR-1306	46.1451	-1.49052	0.173443	-8.59373	8.41936e-18	8.00998e-17	-1.53949	0.196619	-7.8298	4.88642e-15	4.41588e-14	119.125	38.6655	39.9967
miR-130b	155.238	1.66763	0.159916	10.4282	1.84438e-25	2.69384e-24	1.62458	0.179876	9.03169	1.6904e-19	2.42623e-18	53.6782	160.501	165.444
miR-133a-1	21.2224	-2.39341	0.224441	-10.6639	1.50168e-26	2.51167e-25	-2.65678	0.255656	-10.392	2.69538e-25	5.36876e-24	86.3638	13.3183	15.9871
miR-133a-2	18.7643	-2.33131	0.228238	-10.2144	1.70928e-24	2.46184e-23	-2.6231	0.260166	-10.0824	6.60843e-24	1.21695e-22	74.6571	11.7395	14.3194
miR-133b	5.97678	-2.43294	0.246984	-9.85059	6.81401e-23	9.17679e-22	-2.69323	0.284946	-9.45172	3.33309e-21	5.42182e-20	24.7627	3.72061	4.47215
miR-134	1038.51	1.23617	0.241142	5.12632	2.95464e-07	1.29281e-06	1.28968	0.272559	4.73175	2.22591e-06	9.4456e-06	459.392	1400.11	1080.88
miR-1343	3.86809	-1.63839	0.232148	-7.05751	1.69515e-12	1.24672e-11	-1.82207	0.268675	-6.78168	1.18783e-11	9.20093e-11	14.0115	2.67337	3.05967
miR-135b	303.244	3.01225	0.215733	13.9629	2.62519e-44	1.04705e-42	2.79389	0.242895	11.5024	1.28225e-30	3.47633e-29	41.2817	290.246	337.562
miR-136	136.095	1.51416	0.225065	6.72768	1.72392e-11	1.16243e-10	1.29445	0.253839	5.09947	3.40605e-07	1.61374e-06	51.9042	162.518	148.565
miR-137	9.01261	4.39585	0.521889	8.42296	3.67083e-17	3.31013e-16	4.55858	0.570055	7.99675	1.27751e-15	1.21053e-14	0.312227	10.6945	9.58058
miR-139	331.093	-2.85397	0.1626	-17.5521	5.72941e-69	8.48772e-67	-2.84147	0.183988	-15.4437	8.31242e-54	1.15899e-51	1584.86	220.396	218.364
miR-140	4327.35	-1.38114	0.0941518	-14.6693	1.01452e-48	4.78207e-47	-1.38433	0.106454	-13.004	1.16077e-38	5.39484e-37	9972.77	3819.05	3827.74
miR-141	6938	1.82053	0.143027	12.7286	4.10173e-37	9.89185e-36	1.89394	0.161673	11.7147	1.07223e-31	3.07792e-30	2068.87	7695.55	7313.67
miR-142	12187.8	2.26572	0.177564	12.76	2.7431e-37	6.77284e-36	2.05035	0.200732	10.2144	1.7095e-24	3.27152e-23	2797.44	11592.2	13458.2
miR-143	506472	-2.59062	0.171842	-15.0756	2.3452e-51	1.43167e-49	-2.38303	0.19428	-12.266	1.37955e-34	5.85409e-33	2.10498e+06	403538	349459
miR-144	894.5	-3.23227	0.220478	-14.6603	1.15743e-48	5.21848e-47	-2.98287	0.249304	-11.9648	5.43394e-33	1.76784e-31	4868.94	615.992	518.262
miR-145	6168.19	-1.52174	0.14542	-10.4644	1.25828e-25	1.91887e-24	-1.57055	0.164413	-9.55248	1.2663e-21	2.16826e-20	15441.6	5197.17	5375.75
miR-147b	13.495	4.40411	0.395139	11.1457	7.51101e-29	1.36648e-27	4.95271	0.422371	11.726	9.38196e-32	2.77479e-30	0.552669	19.7122	13.3236
miR-148a	206189	1.48223	0.140279	10.5663	4.27198e-26	6.92195e-25	1.45004	0.158595	9.14303	6.07243e-20	8.84581e-19	77518.8	211799	216576
miR-153-2	84.8723	4.14302	0.283479	14.6149	2.25663e-48	9.75053e-47	4.16932	0.314418	13.2605	3.9251e-40	2.01626e-38	4.79114	91.2366	90.0136
miR-154	26.1598	1.37046	0.258243	5.30689	1.11514e-07	5.16249e-07	1.6752	0.289084	5.79485	6.83817e-09	4.19752e-08	10.5072	32.4608	26.4761
miR-15b	1029.09	-1.11714	0.104619	-10.6781	1.28821e-26	2.18996e-25	-1.05668	0.118299	-8.93232	4.17164e-19	5.65489e-18	2027.4	972.128	932.361
miR-182	100527	2.20803	0.149628	14.7568	2.78113e-49	1.44202e-47	2.35342	0.169162	13.9122	5.34034e-44	3.72298e-42	22699.9	116012	104890
miR-183	49946	2.42748	0.161022	15.0755	2.347e-51	1.43167e-49	2.55363	0.182041	14.0278	1.05368e-44	8.56991e-43	9707.12	56993.1	52221.4
miR-184	47.8541	-2.73957	0.349602	-7.83624	4.64227e-15	3.85123e-14	-3.51092	0.396316	-8.85887	8.08284e-19	1.06306e-17	231.545	20.2926	34.6336
miR-187	142.047	2.06616	0.30218	6.83752	8.05749e-12	5.53352e-11	1.8828	0.340897	5.52309	3.33098e-08	1.80015e-07	38.2763	137.075	155.527
miR-188	12.3483	1.15435	0.175359	6.58277	4.61759e-11	2.95583e-10	1.19924	0.192938	6.21569	5.10993e-10	3.4634e-09	5.66557	13.3632	12.8832
miR-190a	15.2413	-1.95399	0.155694	-12.5501	3.9676e-36	9.14312e-35	-1.88935	0.177956	-10.6169	2.48639e-26	5.3927e-25	45.2672	12.7319	12.3403
miR-1911	6.29918	1.51669	0.538911	2.81436	0.00488751	0.0120103	1.75292	0.603646	2.90388	0.00368564	0.00917649	5.36047	19.21	39.5781
miR-192	9995.25	2.60119	0.337816	7.70003	1.36033e-14	1.10208e-13	3.04587	0.381907	7.97541	1.51877e-15	1.41173e-14	1626.45	13432.4	9869.59
miR-193a	956.989	-1.48677	0.138276	-10.7522	5.78713e-27	1.00021e-25	-1.2466	0.156347	-7.97328	1.54523e-15	1.42278e-14	2269.31	953.055	807.042
miR-194-1	1916.66	2.29024	0.329927	6.94165	3.87537e-12	2.71538e-11	2.48623	0.372936	6.66663	2.61748e-11	1.96512e-10	405.141	2270.59	1982.31
miR-194-2	2098.33	1.58149	0.332075	4.76244	1.91262e-06	7.83949e-06	1.7748	0.375399	4.72776	2.27006e-06	9.50894e-06	717.116	2453.51	2145.96
miR-195	214.361	-2.16021	0.128591	-16.7991	2.47879e-63	2.85612e-61	-2.14381	0.145598	-14.7241	4.51118e-49	4.1492e-47	741.035	167.847	166.24
miR-196a-1	249.178	5.58737	0.440169	12.6937	6.40958e-37	1.51062e-35	5.5172	0.493718	11.1748	5.41801e-29	1.28975e-27	5.73341	258.239	271.168
miR-196a-2	269.939	6.13941	0.442476	13.8751	8.96455e-44	3.44305e-42	6.06436	0.495102	12.2487	1.70687e-34	6.94129e-33	4.24861	279.573	294.565
miR-196b	545.149	3.31996	0.353811	9.38344	6.38572e-21	7.44043e-20	3.32174	0.399544	8.31382	9.26694e-17	9.52056e-16	59.751	595.332	594.65
miR-197	1846.52	-2.95108	0.157171	-18.7762	1.18264e-78	2.4528e-76	-3.02886	0.177728	-17.0422	3.99717e-65	1.30041e-62	9264.07	1133.93	1196.75
miR-1976	73.1719	-1.92687	0.12739	-15.1258	1.09388e-51	7.56235e-50	-2.13131	0.144773	-14.7217	4.67635e-49	4.1492e-47	238.601	51.9278	59.8959
miR-199a-1	4694.62	1.12947	0.123364	9.1556	5.40578e-20	5.83937e-19	1.00883	0.139448	7.23444	4.67445e-13	3.93299e-12	2277.27	4585.55	4985.19
miR-199a-2	7768.18	1.11766	0.125489	8.90642	5.27077e-19	5.30659e-18	1.00514	0.14186	7.08544	1.38604e-12	1.15621e-11	3790.47	7611.5	8228.59
miR-19a	103.408	1.54497	0.186002	8.30623	9.87868e-17	8.68152e-16	1.52777	0.209216	7.30235	2.82782e-13	2.42101e-12	36.7216	108.927	110.041
miR-200a	3818.42	2.02612	0.153635	13.1879	1.03025e-39	2.81151e-38	1.62307	0.173646	9.34698	9.01838e-21	1.3753e-19	1051.49	3240.05	4284.6
miR-202	2.36374	-1.93843	0.337859	-5.7374	9.61395e-09	4.98483e-08	-2.43389	0.39272	-6.19753	5.73559e-10	3.8342e-09	8.40928	1.41309	1.95669
miR-203b	247.015	1.39383	0.240123	5.80465	6.45017e-09	3.41267e-08	1.22324	0.271182	4.51079	6.45858e-06	2.60478e-05	101.451	238.027	268.125
miR-205	2056.03	2.2773	0.370146	6.15243	7.63033e-10	4.42048e-09	2.14429	0.418426	5.12467	2.98058e-07	1.43303e-06	468.361	2725.49	2266.09
miR-206	2.65483	-3.83985	0.428548	-8.96015	3.24251e-19	3.36248e-18	-2.67217	0.48603	-5.49797	3.84197e-08	2.06031e-07	16.3733	2.5112	4.41894
miR-20a	994.615	1.14548	0.143197	7.99936	1.25064e-15	1.0544e-14	1.13741	0.161787	7.03029	2.06107e-12	1.70475e-11	472.651	1043.42	1049.37
miR-20b	98.8439	1.44768	0.272386	5.3148	1.06776e-07	4.96533e-07	1.54259	0.307187	5.02169	5.12199e-07	2.36922e-06	37.6107	110.838	103.846
miR-21	1.49605e+06	1.86029	0.119818	15.526	2.31365e-54	1.84558e-52	1.83133	0.135463	13.5191	1.20698e-41	6.92951e-40	442517	1.57477e+06	1.60671e+06
miR-210	4752.24	4.60786	0.221841	20.771	7.92478e-96	4.109e-93	4.6578	0.250588	18.5875	4.05746e-77	3.96008e-74	212.247	5306.12	5125.51
miR-2110	15.7994	-2.01994	0.157542	-12.8216	1.24094e-37	3.13866e-36	-1.97074	0.180125	-10.9409	7.34353e-28	1.7065e-26	54.9389	12.5341	12.1858
miR-215	159.377	2.81417	0.377797	7.44889	9.4129e-14	7.33923e-13	2.35419	0.426229	5.5233	3.32699e-08	1.80015e-07	25.7645	203.514	231.545
miR-217	119.748	1.27706	0.225607	5.66053	1.50903e-08	7.74687e-08	1.34301	0.254417	5.27879	1.3004e-07	6.50868e-07	50.8667	304.631	158.317
miR-218-1	133.305	-1.8045	0.128688	-14.0223	1.13923e-44	4.72554e-43	-1.75481	0.145753	-12.0396	2.19929e-33	7.66609e-32	383.719	113.997	110.133
miR-218-2	127.237	-1.75226	0.132243	-13.2504	4.49103e-40	1.29367e-38	-1.68773	0.14976	-11.2696	1.85474e-29	4.64161e-28	354.955	110.609	105.795
miR-224	246.451	2.19235	0.233826	9.376	6.8524e-21	7.89549e-20	2.19924	0.26371	8.33962	7.45302e-17	7.73846e-16	57.8877	266.22	265.088
miR-2355	277.052	1.13286	0.143463	7.8965	2.86833e-15	2.39876e-14	1.13193	0.161826	6.99471	2.65803e-12	2.18003e-11	131.363	291.23	291.327
miR-26a-1	6839.8	-1.04712	0.108024	-9.69343	3.21549e-22	4.06642e-21	-1.1553	0.122133	-9.45938	3.09767e-21	5.12428e-20	13148.4	5904.27	6364.22
miR-26a-2	6862.82	-1.03724	0.107783	-9.62343	6.36721e-22	7.95518e-21	-1.144	0.12186	-9.38778	6.12756e-21	9.64597e-20	13115.6	5935.89	6391.99
miR-29b-1	2008.26	1.54992	0.143127	10.8289	2.51065e-27	4.48887e-26	1.34408	0.161745	8.30985	9.58264e-17	9.74235e-16	747.301	1901.91	2192.98
miR-29b-2	2136.22	1.41827	0.133267	10.6423	1.8939e-26	3.11743e-25	1.20139	0.150606	7.97703	1.49894e-15	1.4067e-14	870.282	2004.35	2328.85
miR-301a	71.0282	2.76732	0.204022	13.5638	6.56013e-42	2.12589e-40	2.76941	0.227069	12.1963	3.25117e-34	1.26926e-32	10.5765	76.9111	76.5396
miR-301b	10.5252	3.79845	0.363076	10.4618	1.29313e-25	1.94344e-24	3.71302	0.389726	9.52724	1.61518e-21	2.71795e-20	0.798183	11.0662	11.416
miR-30a	102820	-1.95623	0.161061	-12.1459	6.03393e-34	1.25144e-32	-2.1008	0.182092	-11.537	8.58501e-31	2.39399e-29	326730	76170.6	84199.2
miR-31	91.1072	4.38645	0.387839	11.31	1.17122e-29	2.29161e-28	5.24318	0.432565	12.1212	8.15958e-34	2.94954e-32	4.00378	153.584	84.7979
miR-3150b	7.42138	-1.02228	0.29616	-3.45177	0.000556924	0.00161773	-1.18003	0.33634	-3.50845	0.000450718	0.00134526	15.1926	6.24478	6.91685
miR-3154	0.949804	-3.37582	0.323254	-10.4433	1.5732e-25	2.33059e-24	-2.57496	0.376141	-6.84573	7.60854e-12	6.03735e-11	6.60005	0.6812	0.380626
miR-3170	5.18768	2.63483	0.320556	8.21957	2.04239e-16	1.7798e-15	3.0389	0.339508	8.95088	3.5266e-19	4.84783e-18	1.18168	6.91178	5.15298
miR-3199-2	3.0297	-1.11225	0.15498	-7.17678	7.1374e-13	5.40254e-12	-1.09523	0.179764	-6.09258	1.11107e-09	7.18147e-09	6.66228	2.80099	2.67347
miR-323a	16.2983	1.73536	0.353578	4.908	9.20095e-07	3.89444e-06	1.60316	0.395926	4.04913	5.14089e-05	0.000179839	6.23603	33.7041	22.4413
miR-323b	26.0246	2.86684	0.383987	7.46599	8.26787e-14	6.49529e-13	2.21919	0.429349	5.16874	2.35674e-07	1.15009e-06	5.06347	44.7157	35.6244
miR-326	112.725	-1.82369	0.205233	-8.88595	6.3375e-19	6.25904e-18	-2.08003	0.232346	-8.95228	3.48216e-19	4.84783e-18	343.141	79.8477	95.6077
miR-328	233.206	-3.00641	0.179609	-16.7386	6.85519e-63	7.10883e-61	-3.20414	0.203335	-15.7579	6.05736e-56	1.1824e-53	1207.9	130.338	149.28
miR-33a	104.09	1.76648	0.178442	9.89946	4.18511e-23	5.71047e-22	1.74834	0.200409	8.72386	2.68872e-18	3.20023e-17	32.6379	109.341	110.955
miR-33b	21.0771	2.61432	0.247782	10.5509	5.03248e-26	8.02874e-25	2.53498	0.272145	9.31482	1.22163e-20	1.83432e-19	4.03158	21.5176	22.6823
miR-345	86.9984	1.6193	0.18926	8.55595	1.16898e-17	1.0921e-16	1.57875	0.212652	7.42408	1.13565e-13	9.89637e-13	32.93	89.533	92.0555
miR-34c	453.474	-1.01334	0.313971	-3.22749	0.0012488	0.00340791	-1.44251	0.355008	-4.0633	4.83828e-05	0.000170475	885.9	325.933	438.795
miR-3607	232.687	2.41072	0.267722	9.00454	2.16577e-19	2.31536e-18	2.59106	0.301916	8.58204	9.32066e-18	1.03375e-16	47.46	272.74	240.534
miR-3615	23.7764	-1.38249	0.154164	-8.96769	3.02793e-19	3.17168e-18	-1.51774	0.175507	-8.64777	5.25145e-18	6.10168e-17	60.9807	19.0329	20.7675
miR-3677	26.0165	1.17615	0.193067	6.09195	1.11541e-09	6.35537e-09	1.42415	0.21525	6.61624	3.6845e-11	2.74509e-10	11.1859	31.1905	26.3799
miR-372	11.4637	2.32373	0.602223	3.85859	0.000114041	0.000366133	2.94901	0.674775	4.37037	1.24039e-05	4.65623e-05	2.816	916.365	153.562
miR-375	151778	1.06665	0.263307	4.05099	5.10005e-05	0.000173402	1.4224	0.297687	4.77818	1.7689e-06	7.57212e-06	70274.2	188354	147192
miR-376a-1	5.41013	1.72483	0.364386	4.73351	2.20666e-06	8.93068e-06	2.24058	0.400693	5.59175	2.24791e-08	1.26089e-07	1.81273	7.40095	5.31565
miR-376b	5.86354	1.95571	0.344052	5.68436	1.31304e-08	6.77427e-08	2.46907	0.376068	6.56548	5.18654e-11	3.72211e-10	1.42287	8.07405	5.77189
miR-378a	1833.51	-2.10681	0.137429	-15.3302	4.8049e-53	3.55906e-51	-1.84951	0.155389	-11.9025	1.14921e-32	3.5051e-31	6029.79	1672.64	1399.5
miR-378c	23.287	-1.5547	0.148167	-10.4929	9.31235e-26	1.44133e-24	-1.44983	0.168426	-8.60809	7.42854e-18	8.43053e-17	57.9647	21.2441	19.8938
miR-382	73.1582	1.27043	0.238294	5.33136	9.7482e-08	4.55355e-07	1.52342	0.268332	5.67737	1.36779e-08	7.85271e-08	30.7967	87.9862	74.1019
miR-3917	6.71768	-1.65133	0.224256	-7.36361	1.79005e-13	1.37503e-12	-1.51816	0.255707	-5.93712	2.90074e-09	1.82653e-08	19.3477	5.9026	5.46752
miR-409	110.255	1.60635	0.253196	6.3443	2.23434e-10	1.35498e-09	1.67396	0.285419	5.86493	4.49312e-09	2.81108e-08	39.0948	121.233	115.899
miR-412	15.5987	1.24668	0.309986	4.02174	5.77704e-05	0.000192013	1.30597	0.347297	3.76039	0.000169647	0.000544656	6.90747	21.9884	18.445
miR-423	811.185	-1.29601	0.104902	-12.3545	4.60758e-35	9.95429e-34	-1.22315	0.11863	-10.3106	6.3131e-25	1.23232e-23	1773.43	753.946	716.908
miR-424	408.051	1.47912	0.173952	8.50307	1.84638e-17	1.70955e-16	1.73908	0.196335	8.85769	8.16902e-19	1.06306e-17	148.459	493.532	412.247
miR-425	820.746	1.13826	0.127105	8.95533	3.38736e-19	3.44382e-18	1.04439	0.143564	7.27475	3.47069e-13	2.94556e-12	395.925	815.94	870.725
miR-429	535.527	1.49256	0.161258	9.25577	2.12689e-20	2.32167e-19	1.23067	0.182101	6.75818	1.39735e-11	1.06548e-10	207.893	490.512	588.229
miR-449a	20.9247	1.58522	0.394658	4.0167	5.90194e-05	0.000195537	1.04017	0.444284	2.34123	0.0192202	0.0406919	7.78719	20.0211	35.3939
miR-450a-1	19.9449	1.97398	0.210126	9.39424	5.76312e-21	6.79132e-20	1.90849	0.231763	8.23464	1.80095e-16	1.81209e-15	5.25821	20.6773	21.5843
miR-450a-2	19.4798	1.95886	0.210856	9.29002	1.54263e-20	1.72012e-19	1.87741	0.232601	8.07136	6.95193e-16	6.71791e-15	5.05366	19.9929	21.1543
miR-450b	76.9664	1.26303	0.19872	6.35584	2.07292e-10	1.26448e-09	1.2462	0.223629	5.57264	2.5091e-08	1.38355e-07	33.1144	80.5217	81.3484
miR-451a	3809.43	-2.91524	0.222042	-13.1292	2.23914e-39	5.95383e-38	-2.36948	0.251039	-9.43867	3.77559e-21	6.04094e-20	17699.6	3425.19	2346.43
miR-4521	3.40713	-1.95944	0.210554	-9.3061	1.3261e-20	1.49474e-19	-1.87109	0.244429	-7.65492	1.93429e-14	1.71624e-13	13.3535	2.67781	2.48973
miR-4652	8.78883	4.65301	0.550013	8.4598	2.67828e-17	2.43629e-16	4.944	0.602446	8.20654	2.27649e-16	2.24429e-15	0.26546	11.2456	9.20489
miR-4668	8.34402	2.61544	0.26099	10.0212	1.23011e-23	1.74742e-22	2.67989	0.277965	9.64111	5.36074e-22	9.51288e-21	1.194	9.35241	8.90228
miR-4732	5.32877	-4.51519	0.271795	-16.6125	5.65769e-62	5.33366e-60	-4.44236	0.318059	-13.9671	2.47572e-44	1.85869e-42	43.9596	1.79385	1.79542
miR-4788	17.2945	3.89599	0.5828	6.68495	2.31008e-11	1.51618e-10	2.92395	0.650847	4.49253	7.03804e-06	2.80372e-05	1.45205	33.6916	75.0144
miR-483	11.6134	-1.37869	0.382308	-3.60622	0.00031069	0.000944826	-1.74138	0.433685	-4.01531	5.93673e-05	0.00020547	29.0263	22.3948	37.2563
miR-486-1	822.789	-4.4469	0.223182	-19.9249	2.47343e-88	8.54983e-86	-4.02341	0.252384	-15.9416	3.25907e-57	7.95214e-55	6430.03	394.906	294.587
miR-486-2	814.216	-4.43522	0.226042	-19.6212	1.01907e-85	2.64195e-83	-4.01075	0.255617	-15.6905	1.75711e-55	2.85824e-53	6342.31	392.954	292.931
miR-487b	26.35	1.52443	0.285669	5.33635	9.48355e-08	4.44997e-07	1.62817	0.320255	5.08397	3.69632e-07	1.73443e-06	9.63459	29.4926	27.616
miR-489	4.20462	2.27747	0.436637	5.21593	1.82898e-07	8.14014e-07	2.31856	0.479723	4.83313	1.34402e-06	5.8561e-06	0.732893	7.49835	5.32897
miR-490	3.49085	-2.1387	0.483795	-4.42068	9.83899e-06	3.64394e-05	-2.98909	0.555376	-5.3821	7.36211e-08	3.84247e-07	12.8019	1.53445	2.98392
miR-493	57.4511	1.29072	0.237369	5.43763	5.39953e-08	2.58033e-07	1.75834	0.266845	6.58937	4.41698e-11	3.24133e-10	23.3493	77.3592	56.0899
miR-496	11.6498	1.22593	0.292821	4.18663	2.83128e-05	9.98652e-05	1.26208	0.326923	3.86047	0.000113169	0.000371895	5.05291	16.0637	12.2567
miR-503	41.7584	2.24381	0.225078	9.969	2.08306e-23	2.91909e-22	2.17114	0.250863	8.65469	4.94253e-18	5.81194e-17	11.6857	42.7407	45.0077
miR-504	9.46338	-2.43827	0.260888	-9.34603	9.09978e-21	1.03697e-19	-2.28121	0.297177	-7.67624	1.63827e-14	1.46692e-13	38.7529	7.2543	6.64002
miR-509-2	23.1432	1.54594	0.401541	3.85002	0.000118107	0.000376852	1.0482	0.452247	2.31777	0.0204618	0.0430403	8.96359	18.2084	25.7452
miR-517a	4.45088	-4.70636	0.835369	-5.63387	1.76213e-08	9.00163e-08	-4.17692	0.947411	-4.40877	1.03959e-05	3.97896e-05	37.4422	9.6029	12.1785
miR-517b	4.4278	-4.71847	0.853122	-5.53083	3.18728e-08	1.58144e-07	-4.20525	0.967513	-4.34646	1.38354e-05	5.1737e-05	37.3749	9.34411	11.2282
miR-5187	2.3706	-1.20606	0.180562	-6.6795	2.39761e-11	1.56372e-10	-1.12182	0.209046	-5.36637	8.03361e-08	4.17064e-07	6.47628	2.04456	1.9946
miR-518b	1.64848	-4.75906	0.676491	-7.03492	1.99371e-12	1.43575e-11	-4.73684	0.777033	-6.09605	1.08718e-09	7.07393e-09	14.7914	12.7014	17.9704
miR-518c	1.30098	-4.43543	0.792625	-5.59588	2.19511e-08	1.09968e-07	-3.96146	0.903934	-4.38247	1.17343e-05	4.42187e-05	10.8841	8.70696	12.5823
miR-518e	1.59529	-3.37312	0.616019	-5.47567	4.3585e-08	2.11204e-07	-1.98805	0.696636	-2.85379	0.00432012	0.0105675	8.3866	11.6082	24.5094
miR-520a	2.46024	-4.42027	0.569705	-7.75888	8.56826e-15	6.99628e-14	-2.88112	0.644496	-4.47034	7.80945e-06	3.09838e-05	17.889	26.6736	45.3655
miR-525	1.09758	-4.51785	0.696498	-6.48652	8.78419e-11	5.52073e-10	-4.60598	0.800437	-5.75433	8.69846e-09	5.2084e-08	9.76393	11.5958	25.5332
miR-526b	2.7048	-4.10647	0.635426	-6.46254	1.0296e-10	6.39337e-10	-3.41371	0.722019	-4.728	2.26739e-06	9.50894e-06	19.4943	22.5066	40.6357
miR-539	29.4324	2.94062	0.3304	8.90018	5.57579e-19	5.55971e-18	2.52891	0.368074	6.87065	6.39114e-12	5.11291e-11	4.84504	34.4125	33.4591
miR-548v	9.75238	2.52923	0.297626	8.49801	1.92863e-17	1.7699e-16	2.57678	0.324015	7.95267	1.82532e-15	1.66496e-14	1.66276	11.0551	10.4011
miR-550a-1	12.8366	1.08813	0.187667	5.79822	6.70213e-09	3.52797e-08	1.41166	0.206624	6.83202	8.37285e-12	6.59024e-11	6.79457	16.0867	12.709
miR-551b	18.1906	1.76976	0.301598	5.86793	4.41274e-09	2.39582e-08	2.21689	0.335869	6.60044	4.09932e-11	3.03101e-10	5.29382	24.3516	17.7986
miR-552	67.7794	2.4066	0.479826	5.01558	5.28742e-07	2.2564e-06	1.23978	0.541608	2.28908	0.0220749	0.0458479	15.4846	36.9141	82.8681
miR-561	5.12366	1.46103	0.330981	4.41425	1.0136e-05	3.74028e-05	1.62324	0.364866	4.44886	8.63256e-06	3.37015e-05	1.69905	5.86477	5.33664
miR-5698	23.0317	1.44238	0.303914	4.74601	2.07467e-06	8.4702e-06	1.01465	0.341556	2.97066	0.00297158	0.00755275	11.0926	18.8387	25.543
miR-574	438.304	-1.36359	0.140005	-9.73958	2.04392e-22	2.68297e-21	-1.32425	0.158337	-8.36347	6.09024e-17	6.39148e-16	1001.13	396.248	385.582
miR-577	33.9191	5.20138	0.399918	13.0061	1.12929e-38	2.92767e-37	4.92195	0.435607	11.2991	1.326e-29	3.49777e-28	0.8727	31.3629	37.9721
miR-590	77.262	1.30573	0.134415	9.71419	2.62331e-22	3.40046e-21	1.33718	0.150445	8.88816	6.21309e-19	8.30681e-18	31.2701	83.409	81.3586
miR-592	11.4902	1.891	0.269863	7.00725	2.4304e-12	1.72625e-11	1.62649	0.298345	5.4517	4.98911e-08	2.63209e-07	3.10672	10.404	12.6136
miR-598	73.726	-1.36256	0.151369	-9.00157	2.22521e-19	2.35464e-18	-1.37219	0.171444	-8.00374	1.20695e-15	1.15489e-14	166.904	64.78	65.268
miR-605	2.11575	-2.71997	0.22684	-11.9907	3.97569e-33	8.0839e-32	-2.58818	0.269262	-9.61211	7.10767e-22	1.23877e-20	11.6629	1.47336	1.19184
miR-615	9.98059	1.65302	0.409595	4.03574	5.44303e-05	0.000182078	1.31264	0.458786	2.86111	0.00422166	0.0103787	4.5688	8.68651	11.0026
miR-616	15.9275	2.78375	0.264649	10.5187	7.08811e-26	1.11369e-24	2.46768	0.289127	8.53493	1.40238e-17	1.5208e-16	4.05943	14.3801	17.646
miR-628	94.9288	1.42098	0.209858	6.77117	1.27744e-11	8.71519e-11	1.45617	0.236272	6.16312	7.13248e-10	4.73558e-09	35.6465	100.853	98.113
miR-6502	2.39189	-1.61334	0.220877	-7.30426	2.78804e-13	2.12588e-12	-1.69062	0.257425	-6.56742	5.11934e-11	3.70109e-10	5.92599	1.98934	2.10088
miR-6510	11.4448	1.96058	0.373761	5.24553	1.5583e-07	7.04239e-07	2.3944	0.415434	5.76361	8.23338e-09	4.99116e-08	3.50491	15.3377	11.2892
miR-6511b-1	7.10137	-2.7879	0.208822	-13.3506	1.17446e-40	3.47976e-39	-2.88195	0.241935	-11.9121	1.02413e-32	3.22434e-31	37.4174	4.10842	4.46071
miR-6511b-2	7.131	-2.83299	0.210268	-13.4733	2.24701e-41	6.85339e-40	-2.92467	0.243581	-12.007	3.26558e-33	1.09904e-31	38.2223	4.24258	4.39744
miR-653	93.1638	1.48954	0.247277	6.02377	1.70396e-09	9.60327e-09	1.58578	0.278643	5.69107	1.26249e-08	7.33448e-08	34.1656	180.728	125.513
miR-655	6.95078	1.14086	0.2989	3.81688	0.000135149	0.000427284	1.51911	0.330953	4.5901	4.43042e-06	1.81684e-05	2.88046	8.81778	6.92577
miR-6720	6.78087	-1.61615	0.236355	-6.83778	8.04283e-12	5.53352e-11	-1.4172	0.268893	-5.27048	1.36069e-07	6.7757e-07	18.088	6.38281	5.50616
miR-675	107.266	1.3139	0.368928	3.56139	0.000368903	0.00110246	2.29972	0.416412	5.52269	3.33839e-08	1.80015e-07	54.3178	527.012	270.631
miR-6788	1.23093	-3.27381	0.289164	-11.3216	1.02537e-29	2.04482e-28	-3.61044	0.354121	-10.1955	2.0769e-24	3.89818e-23	8.78898	0.424356	0.588321
miR-6802	1.84916	-1.21316	0.234508	-5.17323	2.30076e-07	1.01961e-06	-1.2261	0.271952	-4.50852	6.52802e-06	2.61121e-05	6.63874	1.48715	1.39336
miR-6803	1.33634	-1.74885	0.282501	-6.19059	5.99404e-10	3.51176e-09	-1.59526	0.327932	-4.8646	1.14687e-06	5.0649e-06	5.95811	1.0063	0.907276
miR-6820	2.24789	-1.42607	0.229417	-6.21604	5.09854e-10	3.00409e-09	-1.60736	0.268917	-5.97716	2.27055e-09	1.439e-08	8.14418	1.45566	1.75586
miR-6892	16.0032	-2.7865	0.176961	-15.7464	7.26891e-56	6.28155e-54	-2.65222	0.202431	-13.1018	3.2139e-39	1.56838e-37	75.904	11.354	10.4656
miR-7-1	92.0533	1.62913	0.132079	12.3345	5.90404e-35	1.24949e-33	1.79667	0.147484	12.1822	3.8688e-34	1.45229e-32	29.8519	107.001	95.2741
miR-708	489.511	2.92472	0.165195	17.7046	3.86374e-70	6.67783e-68	2.8	0.185988	15.0547	3.21516e-51	3.9225e-49	69.9668	494.066	538.764
miR-7641-1	3.61777	-3.47385	0.458772	-7.57206	3.67356e-14	2.908e-13	-2.99109	0.522347	-5.72626	1.02668e-08	6.07298e-08	21.6233	2.51892	1.87653
miR-7641-2	1.83093	-3.83998	0.470461	-8.16218	3.29042e-16	2.81997e-15	-3.31497	0.539371	-6.14599	7.94645e-10	5.24036e-09	12.6553	1.06557	0.806089
miR-767	112.847	6.02369	0.718727	8.38105	5.24571e-17	4.68948e-16	6.04395	0.806392	7.49505	6.62733e-14	5.82727e-13	2.1293	124.901	123.103
miR-7705	5.59199	1.32337	0.246881	5.36034	8.30669e-08	3.93335e-07	1.54174	0.268985	5.73168	9.94398e-09	5.91788e-08	2.00954	6.6825	5.74779
miR-889	73.0433	1.53993	0.265213	5.80638	6.38366e-09	3.3948e-08	1.44142	0.298806	4.82394	1.40747e-06	6.10528e-06	26.7271	106.458	87.8602
miR-891a	47.5539	2.44471	0.388101	6.29916	2.99258e-10	1.79382e-09	1.61951	0.436964	3.70629	0.000210321	0.000670827	10.7653	46.6959	56.1932
miR-9-1	4642.93	5.0793	0.338754	14.9941	8.03028e-51	4.62633e-49	5.24524	0.382775	13.7032	9.7126e-43	6.31966e-41	144.666	5495.22	4898.19
miR-9-2	4645.57	5.00806	0.338646	14.7885	1.73826e-49	9.48726e-48	5.17789	0.382662	13.5312	1.02295e-41	6.23999e-40	151.958	5508.23	4896.58
miR-9-3	4648.3	4.98876	0.338784	14.7255	4.42223e-49	2.18374e-47	5.1584	0.382822	13.4747	2.20454e-41	1.19535e-39	154.126	5511.22	4899.93
miR-93	16714.5	1.23671	0.12978	9.52928	1.58371e-21	1.95512e-20	1.28877	0.146718	8.78397	1.57808e-18	1.97462e-17	7429.08	18149.5	17506.2
miR-937	29.1146	1.43536	0.271647	5.28392	1.26447e-07	5.80203e-07	1.44007	0.304792	4.72476	2.30382e-06	9.56821e-06	13.2959	30.473	30.3395
miR-96	114.353	2.85296	0.169741	16.8077	2.14445e-63	2.77975e-61	2.83801	0.189027	15.0138	5.96743e-51	6.47135e-49	16.342	121.733	122.786
miR-99b	119521	-1.08092	0.116681	-9.26387	1.97147e-20	2.17491e-19	-1.10808	0.131917	-8.39982	4.47158e-17	4.74377e-16	232206	107719	109766

## Sheet: LUSC
DEMs	baseMean	log2FoldChange.early	lfcSE.early	stat.early	pvalue.early	padj.early	log2FoldChange.advanced	lfcSE.advanced	stat.advanced	pvalue.advanced	padj.advanced	Mean.HC	Mean.Early	Mean.Advanced
let-7a-1	26609.5	-1.06083	0.0917853	-11.5578	6.74282e-31	1.07885e-29	-1.12203	0.107238	-10.4629	1.2783e-25	1.90484e-24	51133.2	23492.4	24510.5
let-7a-2	26537.7	-1.06004	0.0918985	-11.5349	8.80183e-31	1.36537e-29	-1.12477	0.10737	-10.4756	1.11788e-25	1.6896e-24	50988.9	23381.5	24454.9
let-7a-3	26725.8	-1.05566	0.0915275	-11.5338	8.91005e-31	1.36537e-29	-1.11514	0.106937	-10.428	1.84742e-25	2.67749e-24	51193.7	23632.8	24627.7
miR-1-1	14.5466	-2.35238	0.22046	-10.6703	1.40167e-26	1.65763e-25	-2.45397	0.262044	-9.3647	7.62664e-21	8.31854e-20	55.6667	10.1688	10.8563
miR-1-2	15.9315	-2.36418	0.217762	-10.8567	1.85338e-27	2.40057e-26	-2.52089	0.258789	-9.7411	2.01356e-22	2.47714e-21	61.476	10.7691	11.9008
miR-100	18104.5	-1.62997	0.152109	-10.7158	8.57971e-27	1.06076e-25	-1.80216	0.177716	-10.1407	3.64554e-24	5.07497e-23	47765	13696.1	15432.6
miR-101-1	21616.9	-2.09212	0.113204	-18.4811	2.93331e-76	2.2796e-74	-2.30655	0.132263	-17.439	4.17094e-68	6.30408e-66	73248.8	14806.8	17179.2
miR-101-2	21724.3	-2.09732	0.112946	-18.5692	5.70166e-77	4.77185e-75	-2.31322	0.131963	-17.5293	8.55433e-69	1.50841e-66	73812.1	14851.8	17249
miR-105-1	197.711	6.76027	0.453978	14.8912	3.76132e-50	1.2401e-48	7.11857	0.525641	13.5426	8.75946e-42	2.50473e-40	2.43659	264.416	206.268
miR-105-2	196.745	6.69818	0.450069	14.8826	4.27824e-50	1.36904e-48	7.07	0.521206	13.5647	6.48447e-42	1.90571e-40	2.47507	265.136	204.904
miR-106a	99.2576	1.43782	0.194995	7.37362	1.66057e-13	9.71343e-13	1.90235	0.227594	8.35856	6.34899e-17	5.41712e-16	36.1997	136.212	98.6316
miR-1224	6.49248	1.66155	0.377438	4.40219	1.07165e-05	3.11754e-05	1.35717	0.441381	3.07482	0.00210629	0.0044569	2.26231	11.6619	7.16755
miR-1248	26.4429	3.38044	0.26824	12.6023	2.05071e-36	3.91434e-35	3.69524	0.308653	11.9721	4.97272e-33	1.0316e-31	2.65576	34.1696	27.5532
miR-1249	7.84974	1.44883	0.165835	8.73659	2.40245e-18	1.92196e-17	1.47057	0.192779	7.62825	2.37964e-14	1.6036e-13	3.09546	8.482	8.27897
miR-1258	2.81718	-1.91694	0.260594	-7.35607	1.89402e-13	1.09032e-12	-2.13229	0.321681	-6.62859	3.38903e-11	1.77505e-10	8.68041	2.01134	2.33567
miR-126	13016.4	-1.35936	0.139833	-9.72133	2.44564e-22	2.33409e-21	-1.40546	0.163374	-8.60268	7.78752e-18	7.16452e-17	29537.9	11151.1	11513
miR-1269a	1376.87	6.57555	0.377252	17.4301	4.87352e-68	2.79073e-66	6.27822	0.440098	14.2655	3.58982e-46	1.58251e-44	17.2307	1276.63	1568.69
miR-1269b	180.584	9.23058	0.664328	13.8946	6.83006e-44	1.76931e-42	9.32753	0.758723	12.2937	9.78926e-35	2.30305e-33	0.322408	210.426	196.73
miR-1270	5.62707	1.09142	0.297215	3.67216	0.000240505	0.000571332	1.01399	0.348691	2.908	0.00363744	0.00738659	2.77052	5.55309	5.97923
miR-1271	16.0042	1.19343	0.140997	8.46426	2.57786e-17	1.96134e-16	1.26001	0.164865	7.64273	2.12672e-14	1.45166e-13	7.20355	17.5736	16.6455
miR-1277	6.21917	2.06728	0.202681	10.1997	1.98889e-24	2.16391e-23	2.08076	0.231089	9.00416	2.17326e-19	2.14889e-18	1.44799	6.74487	6.55829
miR-129-1	30.5475	2.95973	0.327265	9.04384	1.5126e-19	1.29584e-18	2.58709	0.380867	6.79263	1.10109e-11	6.00489e-11	4.47288	87.1364	42.7254
miR-129-2	31.6349	2.83269	0.322118	8.79395	1.44398e-18	1.17243e-17	2.36488	0.375238	6.30234	2.93179e-10	1.44271e-09	5.08691	97.6074	44.9093
miR-1293	13.6066	5.93794	0.434419	13.6687	1.56179e-42	3.69397e-41	5.86651	0.477512	12.2856	1.08255e-34	2.48988e-33	1.91815	14.0909	14.7862
miR-1301	66.6786	1.59114	0.135002	11.786	4.6078e-32	7.59588e-31	1.90722	0.157246	12.1289	7.42375e-34	1.67113e-32	22.5382	84.6554	67.7452
miR-1306	46.0631	1.52556	0.139511	10.9351	7.83198e-28	1.02665e-26	1.63544	0.162681	10.0531	8.90623e-24	1.22374e-22	16.8097	52.1615	48.1536
miR-1307	6167.15	1.08231	0.109479	9.88602	4.78677e-23	4.77799e-22	1.18105	0.127908	9.23357	2.61753e-20	2.76935e-19	3014.85	6836.21	6383.45
miR-130b	178.949	2.58695	0.129396	19.9925	6.39956e-89	1.16045e-86	2.59287	0.150614	17.2153	2.03947e-66	2.39751e-64	32.0023	193.491	192.28
miR-133a-1	12.6841	-2.79479	0.213617	-13.0832	4.10996e-39	8.5993e-38	-3.10935	0.256555	-12.1196	8.31187e-34	1.83207e-32	60.4392	6.78464	8.5529
miR-133a-2	10.9725	-2.68189	0.210051	-12.7678	2.48067e-37	4.87369e-36	-2.92071	0.252738	-11.5563	6.86203e-31	1.25173e-29	49.9199	6.33267	7.57352
miR-133b	3.97656	-3.07171	0.267943	-11.4641	1.99929e-30	2.9003e-29	-3.35125	0.330316	-10.1456	3.46626e-24	4.88974e-23	21.3204	2.02828	2.4342
miR-134	1241.14	1.06255	0.211607	5.02134	5.13113e-07	1.70724e-06	1.26212	0.247224	5.10514	3.30549e-07	1.23141e-06	608.623	1459.62	1424.49
miR-135a-1	2.43338	-1.32364	0.388581	-3.40635	0.000658373	0.00146785	-1.89242	0.470365	-4.02331	5.73851e-05	0.000157697	5.59043	2.89083	2.27058
miR-135a-2	2.55193	-1.85113	0.398917	-4.6404	3.47742e-06	1.06877e-05	-2.39987	0.482916	-4.96953	6.71145e-07	2.41521e-06	7.74046	1.45718	2.2176
miR-135b	157.082	2.35057	0.219637	10.7021	9.95016e-27	1.20286e-25	2.19603	0.256382	8.56549	1.07619e-17	9.81558e-17	33.5931	154.035	171.629
miR-137	8.07324	4.7657	0.519685	9.17037	4.71415e-20	4.13628e-19	5.23271	0.585195	8.94183	3.82791e-19	3.71553e-18	1.12701	11.2737	8.14729
miR-138-2	7.37375	-1.11376	0.2012	-5.53559	3.10178e-08	1.21832e-07	-1.15913	0.241436	-4.80099	1.57882e-06	5.38837e-06	14.6246	6.38074	6.73988
miR-139	153.572	-2.51078	0.156646	-16.0284	8.0962e-58	3.52347e-56	-2.6158	0.183676	-14.2413	5.0742e-46	2.06481e-44	630.381	102.665	110.32
miR-140	3363.84	-1.90586	0.121417	-15.6968	1.59169e-55	6.41393e-54	-1.96575	0.141885	-13.8545	1.19468e-43	4.21322e-42	10268	2627.81	2739.43
miR-141	7373.05	1.86758	0.128308	14.5554	5.39568e-48	1.58662e-46	1.9188	0.149899	12.8006	1.62733e-37	4.19931e-36	2134.89	8072.46	7790.98
miR-142	14047.7	1.02708	0.163049	6.29923	2.99125e-10	1.3732e-09	1.0325	0.190493	5.42016	5.95471e-08	2.38639e-07	7166.92	14660.9	14606
miR-143	216172	-1.55055	0.144034	-10.7651	5.02816e-27	6.43605e-26	-1.59134	0.168277	-9.45668	3.17863e-21	3.61611e-20	545713	181102	186296
miR-144	681.643	-3.30483	0.208936	-15.8175	2.35839e-56	9.86897e-55	-3.47719	0.244258	-14.2357	5.50147e-46	2.15576e-44	3864.21	347.129	391.035
miR-145	5336.35	-1.27001	0.118015	-10.7614	5.23676e-27	6.62511e-26	-1.26898	0.137895	-9.20253	3.49612e-20	3.66227e-19	11479.9	4763.29	4759.98
miR-147b	5.70965	2.87662	0.293103	9.81436	9.76593e-23	9.57237e-22	2.90348	0.331097	8.76925	1.79856e-18	1.68396e-17	0.822405	5.90076	6.01496
miR-149	682.927	3.14041	0.188993	16.6166	5.28811e-62	2.61521e-60	3.07794	0.220624	13.9511	3.09985e-44	1.1713e-42	84.0169	709.31	740.684
miR-151b	4.42933	-1.25829	0.126884	-9.91688	3.51583e-23	3.54187e-22	-1.2882	0.162855	-7.91014	2.57102e-15	1.9022e-14	9.11494	3.98077	3.99116
miR-153-2	42.1582	1.11806	0.180168	6.20565	5.44716e-10	2.45913e-09	1.23318	0.210604	5.85544	4.75737e-09	2.10598e-08	19.9507	68.1876	43.5465
miR-154	29.4938	1.11297	0.21115	5.27097	1.35703e-07	4.92149e-07	1.26659	0.246774	5.13259	2.85779e-07	1.07599e-06	14.1033	33.6851	30.4644
miR-181a-1	4292.21	-1.61434	0.117024	-13.795	2.73102e-43	6.75306e-42	-1.76612	0.136747	-12.9152	3.69359e-38	9.76954e-37	11285	3316.91	3685.26
miR-181a-2	6734.64	-1.21682	0.109073	-11.156	6.6945e-29	9.33797e-28	-1.20426	0.127446	-9.44918	3.41498e-21	3.84367e-20	14014	6081.08	6028.89
miR-181c	346.165	-1.02861	0.12784	-8.04612	8.54579e-16	5.8847e-15	-1.07209	0.149592	-7.16676	7.67928e-13	4.61629e-12	652.389	309.794	319.433
miR-182	86935.4	2.18686	0.155432	14.0696	5.84268e-45	1.58921e-43	2.23243	0.181592	12.2937	9.79557e-35	2.30305e-33	20365	95700.9	92724.8
miR-183	50560.2	2.9326	0.157293	18.6441	1.40951e-77	1.27795e-75	3.06065	0.183765	16.6553	2.77165e-62	2.2557e-60	7043.61	58769	53777.2
miR-187	139.611	1.5416	0.278416	5.53703	3.07643e-08	1.21274e-07	1.48723	0.325268	4.57233	4.82329e-06	1.55108e-05	51.4831	144.422	150
miR-188	14.2597	1.00095	0.142918	7.00371	2.49278e-12	1.33603e-11	1.08762	0.167571	6.49047	8.55698e-11	4.35254e-10	7.36443	15.6728	14.7252
miR-190a	12.1092	-1.36916	0.122764	-11.1528	6.93796e-29	9.55507e-28	-1.41268	0.149867	-9.42626	4.24992e-21	4.73307e-20	27.3574	10.4362	10.7154
miR-1911	24.0426	3.35422	0.492927	6.80471	1.01251e-11	5.17189e-11	3.27109	0.573551	5.70322	1.17565e-08	4.97533e-08	2.60568	24.9996	26.4618
miR-192	1911.22	1.06149	0.178154	5.95828	2.54909e-09	1.10937e-08	1.53923	0.208134	7.3954	1.40986e-13	8.98575e-13	895.028	6454.37	1868.63
miR-193b	391.931	1.83602	0.171752	10.6899	1.13457e-26	1.3565e-25	2.09336	0.200571	10.437	1.68093e-25	2.47003e-24	112.862	481.195	402.55
miR-195	115.753	-1.69307	0.115545	-14.6529	1.29137e-48	4.01432e-47	-1.8468	0.135987	-13.5808	5.20687e-42	1.57396e-40	318.463	88.5822	98.5724
miR-196a-1	161.533	6.09825	0.341147	17.8757	1.82325e-71	1.16688e-69	5.78787	0.39426	14.6804	8.61355e-49	4.79639e-47	2.68403	148.559	184.202
miR-196a-2	178.045	5.90468	0.335419	17.6039	2.3004e-69	1.39046e-67	5.60978	0.388414	14.4428	2.78293e-47	1.33834e-45	3.39337	165.173	202.628
miR-196b	1539.26	5.39939	0.218716	24.6868	1.48273e-134	5.37735e-132	5.34018	0.255083	20.9351	2.56602e-97	9.04948e-95	40.0794	1624.69	1692.41
miR-1976	39.6496	-1.48693	0.116467	-12.7669	2.50852e-37	4.87369e-36	-1.60302	0.138563	-11.5689	5.9235e-31	1.09948e-29	98.29	31.9021	34.7083
miR-19a	147.218	1.44403	0.153098	9.43205	4.02154e-21	3.64619e-20	1.44856	0.178857	8.09902	5.54019e-16	4.37427e-15	57.1243	156.269	155.485
miR-200a	3394.29	1.62917	0.138889	11.73	8.94313e-32	1.45226e-30	1.74451	0.16226	10.7513	5.84357e-27	9.36742e-26	1151.45	3858.43	3561.82
miR-200b	2490.35	1.12973	0.139758	8.08349	6.29394e-16	4.36166e-15	1.1408	0.163287	6.9865	2.81837e-12	1.58608e-11	1195.98	2636.88	2616.82
miR-200c	38597.9	1.19402	0.11867	10.0618	8.15277e-24	8.44782e-23	1.30051	0.138643	9.38031	6.57777e-21	7.24925e-20	17511.7	43133.7	40065
miR-203a	121487	2.12975	0.236607	9.0012	2.23269e-19	1.86859e-18	2.21274	0.276431	8.00468	1.19775e-15	9.18275e-15	29524.7	136863	129212
miR-203b	544.651	1.63583	0.22111	7.39829	1.37949e-13	8.11291e-13	2.17742	0.258271	8.43078	3.43362e-17	2.97768e-16	172.842	781.85	537.391
miR-204	76.8545	1.42149	0.355057	4.00356	6.23972e-05	0.000163193	1.51589	0.414785	3.65464	0.000257541	0.0006322	30.2127	122.315	80.9225
miR-205	43474.9	5.31877	0.217793	24.4213	1.01674e-131	2.76553e-129	5.27034	0.254434	20.7139	2.59401e-95	6.86116e-93	935.372	46326.3	47908
miR-206	4.31408	-2.14702	0.637861	-3.36597	0.000762763	0.00166979	-5.26335	0.772117	-6.81678	9.31062e-12	5.18454e-11	17.0014	0.341108	3.76554
miR-210	7864.5	4.48147	0.166799	26.8674	5.27781e-159	5.74226e-156	4.46446	0.194816	22.9163	3.198e-116	3.38348e-113	383.691	8467.97	8568.18
miR-218-1	127.899	-1.97969	0.128117	-15.4522	7.28665e-54	2.64262e-52	-2.08297	0.150516	-13.8389	1.4851e-43	5.06852e-42	407.951	95.7369	103.202
miR-218-2	123.484	-1.96974	0.128022	-15.386	2.03201e-53	7.13169e-52	-2.0936	0.150448	-13.9158	5.07766e-44	1.85247e-42	392.813	91.6023	100.045
miR-219a-1	16.6116	1.21699	0.143354	8.48942	2.07663e-17	1.60239e-16	1.22091	0.167792	7.27636	3.42938e-13	2.13429e-12	7.44979	17.4291	17.4058
miR-223	1776.18	-1.17048	0.188031	-6.22491	4.81841e-10	2.19273e-09	-1.22955	0.219712	-5.59621	2.19085e-08	8.9842e-08	3641.6	1552.73	1617.8
miR-224	562.499	2.87631	0.214991	13.3788	8.04635e-41	1.78662e-39	2.85848	0.251029	11.3871	4.85072e-30	8.55344e-29	82.9192	601.077	608.591
miR-2277	7.21454	1.98785	0.173831	11.4356	2.77639e-30	3.97463e-29	1.99276	0.198387	10.0448	9.68072e-24	1.29648e-22	1.91706	7.76456	7.68188
miR-26a-1	3514	-1.11464	0.0830367	-13.4235	4.40548e-41	9.98575e-40	-1.15608	0.0970495	-11.9122	1.02217e-32	2.06733e-31	6934.92	3112.33	3202.49
miR-26a-2	3527.87	-1.11686	0.0831308	-13.435	3.76964e-41	8.72631e-40	-1.15728	0.0971593	-11.9111	1.03562e-32	2.06733e-31	6969.01	3125	3213.24
miR-296	38.6407	1.64835	0.214857	7.67184	1.6955e-14	1.06631e-13	1.77924	0.250646	7.09862	1.2601e-12	7.53211e-12	12.9138	44.1664	40.4028
miR-29a	23031.5	-1.11032	0.115404	-9.62119	6.50764e-22	6.10372e-21	-1.21046	0.134832	-8.97754	2.7688e-19	2.7124e-18	45571.1	19692.4	21108.2
miR-29c	8196.69	-1.38974	0.157115	-8.84538	9.12198e-19	7.46219e-18	-1.61449	0.183569	-8.79497	1.43087e-18	1.35166e-17	19248.2	6285.98	7345.59
miR-301a	88.9933	1.75796	0.152604	11.5197	1.04959e-30	1.58605e-29	2.20997	0.177775	12.4313	1.76787e-35	4.34979e-34	26.2125	122.029	89.0201
miR-301b	14.807	3.80696	0.245841	15.4855	4.34974e-54	1.6319e-52	4.03697	0.274343	14.7151	5.16015e-49	3.03302e-47	1.11136	18.6375	15.5418
miR-3065	304.53	-1.95034	0.183455	-10.6312	2.13341e-26	2.49586e-25	-1.60385	0.214493	-7.4774	7.58081e-14	4.91356e-13	912.499	300.1	236.101
miR-30a	87873.2	-2.84029	0.154996	-18.3249	5.23416e-75	3.79651e-73	-2.98114	0.181085	-16.4627	6.80229e-61	4.79788e-59	413630	52384.3	57756.5
miR-30b	1489.69	-1.57375	0.121519	-12.9507	2.32919e-38	4.78144e-37	-1.51054	0.142032	-10.6352	2.04318e-26	3.22639e-25	3768.53	1322.82	1265.91
miR-30d	27425.8	-2.37284	0.116146	-20.4299	9.07314e-93	1.97432e-90	-2.10142	0.135698	-15.486	4.3121e-54	2.68365e-52	101992	23767	19690.8
miR-31	191.032	5.57265	0.323019	17.2518	1.08503e-66	5.90254e-65	5.34162	0.374713	14.2552	4.16011e-46	1.76056e-44	4.49359	182.452	214.125
miR-3200	26.3524	2.33285	0.231661	10.0701	7.49018e-24	7.83588e-23	2.42281	0.269006	9.00655	2.12646e-19	2.13087e-18	5.59772	29.9133	28.1576
miR-320b-1	8.83057	1.25245	0.170144	7.36113	1.82355e-13	1.05533e-12	1.18652	0.199399	5.95046	2.67384e-09	1.20894e-08	3.86728	8.95629	9.39043
miR-320b-2	15.0138	1.29769	0.168016	7.7236	1.13088e-14	7.15347e-14	1.30366	0.19642	6.63712	3.19867e-11	1.68368e-10	6.43948	15.9137	15.8478
miR-323a	20.2225	2.98553	0.303004	9.8531	6.64638e-23	6.57388e-22	2.83157	0.351043	8.06615	7.25518e-16	5.64411e-15	2.83208	26.745	26.5957
miR-323b	26.4375	3.9218	0.312635	12.5444	4.26839e-36	7.8712e-35	4.01309	0.359356	11.1675	5.88381e-29	1.0205e-27	1.86918	30.3442	28.5925
miR-326	27.3731	-2.45375	0.205455	-11.943	7.06122e-33	1.18194e-31	-2.33339	0.242248	-9.63222	5.84552e-22	7.02791e-21	107.705	21.1632	19.4939
miR-338	2342.95	-2.44405	0.178169	-13.7176	7.96647e-43	1.92612e-41	-2.31692	0.208188	-11.129	9.06897e-29	1.52301e-27	9147.21	1836.09	1680.82
miR-33a	206.267	2.02656	0.181972	11.1367	8.316e-29	1.13098e-27	2.06207	0.212446	9.70632	2.83378e-22	3.44613e-21	53.933	225.654	219.777
miR-33b	23.1357	2.35901	0.222646	10.5953	3.13244e-26	3.62563e-25	2.46201	0.258024	9.54178	1.404e-21	1.65048e-20	4.74683	26.62	24.4387
miR-345	100.954	2.23839	0.158124	14.1559	1.71689e-45	4.78969e-44	2.49083	0.184074	13.5316	1.01729e-41	2.83236e-40	22.0623	124.933	104.158
miR-34b	79.5628	-1.19084	0.282977	-4.20826	2.57344e-05	7.17923e-05	-1.1247	0.331037	-3.39752	0.000679992	0.00154384	163.319	74.9256	71.4601
miR-34c	379.72	-1.79937	0.273243	-6.58522	4.54213e-11	2.20618e-10	-1.82031	0.319353	-5.7	1.1981e-08	5.05016e-08	1095.21	310.073	314.554
miR-3605	9.24668	1.03746	0.170692	6.07796	1.21719e-09	5.36156e-09	1.15852	0.199864	5.79652	6.77035e-09	2.97221e-08	4.48829	10.6	9.52958
miR-3607	230.407	1.80065	0.214873	8.38006	5.29015e-17	3.91543e-16	2.05738	0.250925	8.19919	2.42013e-16	1.95458e-15	68.052	283.749	237.481
miR-3651	6.33782	2.14869	0.223499	9.61388	6.98646e-22	6.49681e-21	2.1032	0.256265	8.20715	2.26492e-16	1.8433e-15	1.5988	6.68249	6.82969
miR-3653	32.4636	1.75199	0.160069	10.9452	7.00532e-28	9.29486e-27	1.85615	0.186246	9.96613	2.14427e-23	2.80078e-22	10.004	36.3281	33.8297
miR-3677	24.5973	1.18785	0.178049	6.67149	2.53215e-11	1.25798e-10	1.39888	0.207894	6.72881	1.71052e-11	9.23329e-11	10.9544	29.5242	25.1284
miR-369	42.3558	1.10226	0.216212	5.09808	3.4312e-07	1.17394e-06	1.03473	0.252897	4.0915	4.28591e-05	0.00012092	20.9245	42.6607	44.9836
miR-375	14355	-1.32626	0.294226	-4.50763	6.55571e-06	1.96491e-05	-1.03804	0.343749	-3.01978	0.00252961	0.00527876	30956.9	54426.5	14631.2
miR-376a-1	6.28509	1.58975	0.302931	5.24788	1.53855e-07	5.56128e-07	1.18071	0.355229	3.3238	0.000887983	0.00197371	2.30634	7.31914	7.01694
miR-376b	7.52253	1.35417	0.271395	4.98967	6.0483e-07	2.00017e-06	1.5781	0.316186	4.99103	6.00569e-07	2.17604e-06	3.02809	8.88138	7.80091
miR-3926-2	2.31202	-1.58576	0.167339	-9.47633	2.6339e-21	2.40814e-20	-1.63509	0.217737	-7.5095	5.93522e-14	3.94935e-13	6.03955	1.9198	1.97933
miR-3928	7.17836	1.74179	0.191108	9.11416	7.92812e-20	6.90064e-19	1.81604	0.220302	8.24341	1.67377e-16	1.37275e-15	2.20073	8.37058	7.53369
miR-409	119.403	1.603	0.20995	7.63518	2.25502e-14	1.40198e-13	1.66878	0.245206	6.80562	1.00617e-11	5.51568e-11	41.5143	131.78	126.156
miR-412	15.8356	1.50696	0.288241	5.22811	1.71251e-07	6.12897e-07	1.18247	0.337318	3.5055	0.000455743	0.00107389	6.19222	23.145	19.6048
miR-421	15.5109	1.18845	0.135323	8.78233	1.60128e-18	1.29051e-17	1.39843	0.157683	8.86862	7.40548e-19	7.12273e-18	6.84937	18.3186	15.794
miR-424	288.368	1.60093	0.141695	11.2984	1.33643e-29	1.88836e-28	1.63071	0.165504	9.853	6.65279e-23	8.37934e-22	100.041	310.438	304.192
miR-429	514.68	1.55118	0.158171	9.80699	1.05054e-22	1.02052e-21	1.57218	0.184779	8.50842	1.7632e-17	1.56762e-16	186.339	554.266	546.148
miR-4326	23.4306	1.37387	0.26864	5.11418	3.15103e-07	1.09328e-06	1.67192	0.31347	5.33357	9.62983e-08	3.77346e-07	9.19106	29.1702	23.7764
miR-433	5.09835	1.15676	0.298129	3.88008	0.000104424	0.000262386	1.27513	0.348488	3.65903	0.000253176	0.000622931	2.40713	7.41865	5.31624
miR-4449	5.68356	4.06409	0.386601	10.5124	7.57674e-26	8.67736e-25	4.06755	0.428416	9.49438	2.21517e-21	2.54744e-20	0.401586	6.30762	6.17445
miR-4491	6.51852	2.05193	0.303756	6.75521	1.42632e-11	7.21784e-11	1.61347	0.354196	4.55532	5.2306e-06	1.67696e-05	1.73943	5.43602	7.2468
miR-450b	44.3812	1.27478	0.147197	8.66034	4.70373e-18	3.73552e-17	1.20311	0.172203	6.98658	2.81665e-12	1.58608e-11	19.2526	44.5526	47.0849
miR-451a	3121.33	-3.18537	0.217514	-14.6445	1.46139e-48	4.41665e-47	-3.4798	0.254159	-13.6914	1.14219e-42	3.77637e-41	17053.5	1528.55	1874.58
miR-452	632.527	1.26639	0.182644	6.93368	4.10034e-12	2.15516e-11	1.36118	0.213387	6.37892	1.78338e-10	8.8583e-10	273.28	701.913	657.366
miR-454	36.2032	1.02721	0.111311	9.22829	2.74976e-20	2.45224e-19	1.19598	0.130199	9.18584	4.08336e-20	4.23548e-19	17.9666	42.0382	37.0642
miR-455	1289.44	1.78354	0.154338	11.5561	6.87701e-31	1.08438e-29	1.80771	0.180298	10.0262	1.16904e-23	1.54606e-22	397.443	1391.69	1368.42
miR-4652	19.4183	7.00646	0.374836	18.692	5.74685e-78	5.68416e-76	7.575	0.398464	19.0105	1.39554e-80	2.95297e-78	0.133242	28.8165	19.43
miR-4661	18.4297	1.45665	0.198066	7.3544	1.91781e-13	1.0982e-12	1.52638	0.231079	6.60545	3.96308e-11	2.06549e-10	6.97484	20.3132	19.3886
miR-4668	12.0834	1.87033	0.162733	11.4933	1.42632e-30	2.09708e-29	2.05003	0.186964	10.9649	5.63876e-28	9.32157e-27	3.36522	14.304	12.6115
miR-4709	4.72455	-1.81572	0.176853	-10.2668	9.94031e-25	1.09243e-23	-1.65944	0.217034	-7.64598	2.07362e-14	1.42461e-13	13.3797	4.26622	3.79017
miR-4732	2.07779	-3.20502	0.265426	-12.075	1.43218e-33	2.43471e-32	-3.62957	0.34255	-10.5957	3.11873e-26	4.85237e-25	11.8468	0.933591	1.21096
miR-4746	15.4348	1.7575	0.176146	9.97751	1.91214e-23	1.94431e-22	1.70592	0.204832	8.32838	8.19531e-17	6.88146e-16	4.8807	15.7722	16.5549
miR-4777	1.89734	-2.17076	0.17244	-12.5885	2.44285e-36	4.58246e-35	-2.19942	0.229522	-9.58259	9.46416e-22	1.12507e-20	6.91267	1.34823	1.45083
miR-485	17.2444	1.22565	0.256812	4.77257	1.81888e-06	5.76952e-06	1.50694	0.299745	5.02741	4.9715e-07	1.81374e-06	7.567	25.3389	19.2955
miR-486-1	377.749	-3.54347	0.219209	-16.1648	8.93573e-59	4.22699e-57	-3.73302	0.256402	-14.5593	5.10125e-48	2.69802e-46	2326.07	174.917	199.328
miR-486-2	377.652	-3.53106	0.219358	-16.0973	2.66585e-58	1.20852e-56	-3.70422	0.25657	-14.4374	3.00794e-47	1.38365e-45	2314.03	177.535	200.024
miR-487a	6.53448	1.79793	0.288856	6.22431	4.83691e-10	2.19273e-09	1.90105	0.335185	5.67164	1.41441e-08	5.89151e-08	2.01327	7.28215	6.942
miR-490	2.81404	-3.23899	0.43216	-7.49488	6.63593e-14	4.03346e-13	-3.7898	0.524321	-7.22802	4.90097e-13	3.01467e-12	16.2403	1.15247	1.64821
miR-493	61.0099	1.09493	0.222746	4.91559	8.85167e-07	2.85775e-06	1.21872	0.26031	4.68181	2.84355e-06	9.43096e-06	29.6603	68.6455	63.2987
miR-494	5.41213	1.91028	0.290178	6.58314	4.60606e-11	2.22729e-10	1.62737	0.337906	4.81604	1.46435e-06	5.01386e-06	1.58952	6.22647	5.99791
miR-496	11.7053	1.00393	0.247819	4.05107	5.09845e-05	0.000135295	1.07639	0.290124	3.71011	0.000207167	0.000520624	6.05593	12.6419	12.208
miR-497	74.3841	-1.48507	0.107157	-13.8589	1.12447e-43	2.84516e-42	-1.66519	0.126777	-13.1348	2.08068e-39	5.64452e-38	183.705	57.5094	65.6045
miR-503	30.3648	2.35771	0.179778	13.1146	2.7178e-39	5.79797e-38	2.4679	0.208041	11.8626	1.85241e-32	3.62936e-31	6.09506	34.1324	31.9384
miR-511	82.0963	-1.44656	0.161125	-8.97788	2.76045e-19	2.29265e-18	-1.70923	0.189301	-9.02915	1.73012e-19	1.77715e-18	199.425	60.9515	73.286
miR-526b	5.4342	2.72025	0.571522	4.75965	1.93926e-06	6.13347e-06	1.55328	0.668186	2.32462	0.0200922	0.0350595	0.98203	17.3217	136.84
miR-539	25.9184	1.92236	0.234813	8.18676	2.68344e-16	1.90822e-15	1.92907	0.2736	7.0507	1.7802e-12	1.03486e-11	7.312	27.8493	27.7861
miR-543	5.83435	1.0417	0.256108	4.06741	4.75384e-05	0.000126769	1.26147	0.299258	4.21532	2.49419e-05	7.28965e-05	2.93879	6.75776	6.01145
miR-548b	6.20307	-1.5683	0.210215	-7.46047	8.62152e-14	5.15396e-13	-1.34666	0.251803	-5.34806	8.89004e-08	3.49653e-07	15.5124	6.04183	5.19288
miR-548v	6.58793	1.70045	0.213429	7.96732	1.62148e-15	1.07571e-14	1.85279	0.246268	7.52344	5.33518e-14	3.57254e-13	2.04888	7.58362	6.88671
miR-551b	41.2537	1.22165	0.314244	3.88757	0.000101252	0.000255005	1.26299	0.367212	3.43939	0.000583016	0.00134094	18.5886	44.6916	51.6467
miR-552	5.21556	-1.40634	0.389399	-3.61157	0.000304353	0.000712122	-1.08314	0.458807	-2.36076	0.0182373	0.0319455	11.173	21.6239	4.40528
miR-561	5.65489	1.22337	0.311321	3.92961	8.50833e-05	0.000217302	1.58376	0.362519	4.36876	1.24952e-05	3.7641e-05	2.36656	7.21704	5.49871
miR-577	71.4544	4.98966	0.321167	15.536	1.9791e-54	7.6902e-53	5.38544	0.369983	14.5559	5.35523e-48	2.69802e-46	2.35059	97.9303	74.1305
miR-590	104.741	1.25116	0.10885	11.4944	1.40798e-30	2.09708e-29	1.47666	0.127084	11.6196	3.27612e-31	6.18953e-30	44.5481	124.809	106.807
miR-615	13.2052	4.22422	0.329171	12.8329	1.07286e-37	2.16161e-36	4.13174	0.371114	11.1333	8.63478e-29	1.47348e-27	0.809281	13.7212	14.5768
miR-616	19.9312	2.46568	0.187596	13.1436	1.85301e-39	4.03216e-38	2.91782	0.214812	13.5831	5.04312e-42	1.5693e-40	3.54083	27.1006	19.8274
miR-627	7.80277	1.52791	0.182862	8.35557	6.51201e-17	4.7872e-16	1.67865	0.211536	7.93553	2.09594e-15	1.58393e-14	2.59851	8.86936	8.02132
miR-628	94.4067	1.94305	0.22798	8.5229	1.55612e-17	1.20933e-16	2.34138	0.26596	8.80352	1.32595e-18	1.26383e-17	24.6667	125.774	95.5035
miR-642a	13.4646	1.04018	0.180051	5.77714	7.59817e-09	3.15527e-08	1.25525	0.210418	5.96551	2.43871e-09	1.10736e-08	6.5826	15.9602	13.6714
miR-6499	17.7843	6.67029	0.396353	16.8292	1.49152e-63	7.7275e-62	7.06681	0.426414	16.5726	1.09896e-61	8.30502e-60	0.160649	24.4505	18.4306
miR-651	23.9068	1.3128	0.185109	7.09204	1.32148e-12	7.15311e-12	1.05545	0.216949	4.86494	1.1449e-06	4.01096e-06	10.5552	21.6912	26.0667
miR-6510	73.2414	4.75537	0.33152	14.3442	1.1587e-46	3.31754e-45	4.63459	0.383595	12.082	1.31498e-33	2.7825e-32	3.00589	74.4658	80.9924
miR-652	132.729	-1.13331	0.112427	-10.0804	6.74469e-24	7.12449e-23	-1.12949	0.132021	-8.55535	1.17507e-17	1.05358e-16	264.194	120.635	120.178
miR-671	40.6763	1.40386	0.100998	13.8999	6.34733e-44	1.68437e-42	1.50021	0.117701	12.7459	3.2847e-37	8.27431e-36	16.0163	45.3576	42.3491
miR-675	235.889	3.06693	0.362736	8.455	2.79091e-17	2.10869e-16	3.95921	0.423408	9.35082	8.69702e-21	9.38924e-20	26.6242	789.808	223.099
miR-6892	8.385	-1.49438	0.180255	-8.29036	1.12904e-16	8.24424e-16	-1.22773	0.21569	-5.6921	1.25484e-08	5.24753e-08	19.6215	8.54771	7.08647
miR-7-1	112.571	1.50383	0.120678	12.4615	1.21017e-35	2.19443e-34	1.70397	0.140799	12.1021	1.02927e-33	2.22239e-32	40.6563	134.248	115.673
miR-708	1323.31	3.063	0.155816	19.6578	4.96006e-86	7.70935e-84	3.12468	0.181932	17.1749	4.0906e-66	3.60654e-64	170.625	1487.94	1425.76
miR-744	191.385	1.07863	0.128338	8.40461	4.29271e-17	3.22101e-16	1.26508	0.14996	8.43611	3.28062e-17	2.86851e-16	92.8165	223.402	196.053
miR-760	11.4377	2.51845	0.229941	10.9526	6.45926e-28	8.67614e-27	2.7628	0.263171	10.4981	8.80968e-26	1.35082e-24	2.10441	14.3313	11.8782
miR-767	226.971	6.62812	0.433611	15.2859	9.49877e-53	3.22958e-51	6.876	0.502722	13.6775	1.38312e-42	4.43436e-41	4.12428	285.857	240.769
miR-769	133.387	1.06141	0.108278	9.80259	1.09733e-22	1.05654e-21	1.10224	0.126632	8.70425	3.19687e-18	2.96692e-17	66.5703	143.475	139.243
miR-7702	8.24113	1.36718	0.276988	4.93587	7.97928e-07	2.59924e-06	1.26675	0.324055	3.90905	9.26612e-05	0.00024632	3.33902	8.03252	8.80687
miR-7706	8.93583	1.13008	0.143576	7.87096	3.51918e-15	2.27909e-14	1.40311	0.16679	8.41247	4.01455e-17	3.45316e-16	4.15448	11.0362	9.08412
miR-877	11.1717	2.42087	0.197307	12.2695	1.32003e-34	2.27968e-33	2.62155	0.22485	11.6591	2.06148e-31	3.96554e-30	2.23593	13.8474	11.6834
miR-891a	126.898	4.37165	0.406296	10.7598	5.33032e-27	6.66596e-26	3.36159	0.473717	7.0962	1.28236e-12	7.62212e-12	7.40397	89.7688	351.778
miR-9-1	6914.91	5.13191	0.264635	19.3924	8.94309e-84	1.08112e-81	5.3105	0.309105	17.1802	3.73488e-66	3.59227e-64	326.621	8375.03	7399.72
miR-9-2	6920.85	5.14507	0.264873	19.4247	4.77453e-84	6.49336e-82	5.32927	0.309383	17.2255	1.71082e-66	2.26256e-64	326.539	8409.23	7401.13
miR-9-3	6945.31	5.14157	0.265321	19.3787	1.16776e-83	1.27053e-81	5.32498	0.309907	17.1825	3.59022e-66	3.59227e-64	324.602	8435.23	7428.07
miR-93	27017.9	1.00018	0.134044	7.46153	8.5525e-14	5.14095e-13	1.06591	0.156606	6.80629	1.00146e-11	5.51568e-11	14027.6	29365.8	28058.3
miR-937	12.8555	1.74961	0.242794	7.20616	5.75533e-13	3.21118e-12	2.3389	0.281081	8.32111	8.71418e-17	7.25953e-16	3.7331	19.2417	12.4975
miR-940	14.8822	1.84117	0.179302	10.2685	9.77059e-25	1.08474e-23	1.87684	0.207916	9.02694	1.76542e-19	1.79597e-18	4.48675	16.4148	15.8502
miR-944	535.359	6.36802	0.243406	26.1622	7.1671e-151	3.8989e-148	6.39588	0.282026	22.6783	7.3333e-114	3.87932e-111	7.10617	595.502	584.193
miR-96	111.047	2.9451	0.162983	18.07	5.49108e-73	3.73394e-71	2.96119	0.189333	15.6401	3.88156e-55	2.56668e-53	15.5255	121.084	119.534
miR-99a	1558.79	-1.18425	0.170638	-6.94012	3.91776e-12	2.06919e-11	-1.07415	0.199394	-5.38705	7.16232e-08	2.84877e-07	3160.84	1501.1	1390.92

## Sheet: STAD
DEMs	baseMean	log2FoldChange.early	lfcSE.early	stat.early	pvalue.early	padj.early	log2FoldChange.advanced	lfcSE.advanced	stat.advanced	pvalue.advanced	padj.advanced	Mean.HC	Mean.Early	Mean.Advanced
let-7c	5962.64	-1.31358	0.246914	-5.32	1.0377e-07	5.76575e-07	-1.04008	0.243185	-4.27693	1.89489e-05	7.9233e-05	12069.4	5869.03	4855.51
miR-1-1	229.86	-3.04123	0.349537	-8.70074	3.2973e-18	8.38313e-17	-2.70103	0.344215	-7.84693	4.26351e-15	8.15511e-14	1077.69	165.672	130.795
miR-1-2	244.582	-3.06631	0.344481	-8.90124	5.5228e-19	1.54454e-17	-2.72487	0.339237	-8.03235	9.56254e-16	2.14918e-14	1157.99	175.101	138.121
miR-100	12962.2	-1.33726	0.226061	-5.9155	3.30875e-09	2.33281e-08	-1.07976	0.222648	-4.84965	1.23681e-06	6.35366e-06	26686.2	12625.1	10561.3
miR-105-1	111.511	7.20094	0.713186	10.0969	5.70408e-24	2.99108e-22	6.63193	0.703663	9.42487	4.30636e-21	2.15079e-19	1.0418	103.689	153.814
miR-105-2	111.832	6.78239	0.704238	9.63082	5.92565e-22	2.42884e-20	6.21305	0.694579	8.94505	3.71768e-19	1.23785e-17	1.42383	103.996	154.293
miR-1258	4.117	-1.69809	0.310152	-5.47502	4.37451e-08	2.62158e-07	-1.71155	0.304925	-5.61303	1.98818e-08	1.36441e-07	11.1703	3.32886	3.32016
miR-1269a	115.936	5.92208	0.74514	7.9476	1.90156e-15	3.39448e-14	5.17078	0.734409	7.04074	1.91217e-12	2.45578e-11	2.62734	93.5469	252.697
miR-1269b	19.8022	6.90324	1.1183	6.173	6.70076e-10	5.5117e-09	7.55883	1.10263	6.85527	7.11774e-12	8.41953e-11	0.137707	25.831	22.9211
miR-129-1	15.9392	-1.62719	0.323063	-5.03675	4.73501e-07	2.2572e-06	-1.71492	0.318101	-5.39112	7.00183e-08	4.37448e-07	43.4676	13.1696	23.0153
miR-1301	31.6028	1.3657	0.173229	7.88376	3.17685e-15	5.33076e-14	1.23821	0.170925	7.24414	4.35197e-13	6.63122e-12	13.3478	31.9051	34.5547
miR-1304	5.97463	1.57718	0.348781	4.52199	6.12615e-06	2.44754e-05	1.89767	0.343882	5.51838	3.42135e-08	2.26161e-07	1.96109	7.33266	5.8578
miR-130b	109.501	1.02228	0.172475	5.92709	3.08355e-09	2.21119e-08	1.01815	0.169918	5.99199	2.07293e-09	1.72552e-08	56.2017	115.008	115.06
miR-133a-1	162.819	-3.1129	0.336259	-9.25745	2.09368e-20	7.31915e-19	-2.99352	0.33114	-9.04006	1.56589e-19	5.63092e-18	830.252	104.162	95.8075
miR-133a-2	149.395	-3.14169	0.337989	-9.29524	1.46877e-20	5.35782e-19	-3.01718	0.33284	-9.06496	1.24655e-19	4.66938e-18	771.574	95.2212	87.2694
miR-133b	43.581	-2.85801	0.356087	-8.02616	1.00573e-15	1.91774e-14	-2.80122	0.3506	-7.98981	1.35147e-15	2.89278e-14	203.078	29.0598	27.8469
miR-135b	203.797	3.19594	0.255459	12.5106	6.53501e-36	1.09658e-33	3.09554	0.251744	12.2964	9.47353e-35	1.41945e-32	24.472	209.899	225.062
miR-139	231.964	-2.23382	0.188339	-11.8606	1.89519e-32	2.65011e-30	-2.22582	0.185469	-12.001	3.50836e-33	3.94251e-31	826.945	176.569	175.538
miR-143	1.00248e+06	-2.04696	0.236549	-8.65341	4.99819e-18	1.23338e-16	-1.9809	0.232978	-8.50254	1.85492e-17	5.37925e-16	3.21965e+06	815636	779133
miR-144	405.001	-1.21196	0.238757	-5.07613	3.85196e-07	1.90106e-06	-1.23623	0.235146	-5.2573	1.46183e-07	8.64596e-07	851.112	361.339	367.568
miR-145	20626.2	-2.34342	0.23735	-9.87329	5.43531e-23	2.68248e-21	-2.30855	0.233766	-9.87547	5.31824e-23	3.41507e-21	76876.9	15518.5	15147.7
miR-146b	2432.7	1.64064	0.148522	11.0465	2.28046e-28	2.39163e-26	1.92652	0.146282	13.1699	1.3079e-39	2.3516e-37	749.049	2847.75	2335.77
miR-149	71.2433	-1.19274	0.225109	-5.29848	1.16771e-07	6.28018e-07	-1.5005	0.221749	-6.76663	1.31816e-11	1.51926e-10	162.54	57.3568	70.8432
miR-153-1	8.50143	-1.07289	0.262773	-4.08295	4.4468e-05	0.000157421	-1.10684	0.258607	-4.28001	1.86882e-05	7.85079e-05	15.1094	7.16085	7.2784
miR-17	3479.93	1.15871	0.151513	7.64756	2.04835e-14	3.18252e-13	1.27235	0.149227	8.52629	1.51116e-17	4.52843e-16	1605.05	3876.6	3582.88
miR-181b-1	443.275	1.09796	0.146573	7.49087	6.84208e-14	9.72967e-13	1.20034	0.14437	8.31431	9.22911e-17	2.44029e-15	208.092	477.702	445.106
miR-181b-2	418.251	1.08794	0.154245	7.05332	1.74695e-12	2.18759e-11	1.21946	0.151925	8.02674	1.00098e-15	2.19483e-14	196.056	455.965	416.314
miR-182	40772	1.52424	0.199414	7.64359	2.11255e-14	3.2226e-13	1.36466	0.196404	6.94821	3.69959e-12	4.55607e-11	15262	39302.6	43899.7
miR-183	16419	1.97931	0.21158	9.35489	8.36856e-21	3.19146e-19	1.67458	0.208387	8.03592	9.28784e-16	2.14097e-14	4754.61	15178.4	18748
miR-184	8.83675	2.50764	0.514584	4.87314	1.0984e-06	4.98139e-06	2.69416	0.507596	5.30769	1.11024e-07	6.65403e-07	1.63226	18.1077	29.8008
miR-188	18.8308	1.57482	0.187871	8.38248	5.18218e-17	1.14417e-15	1.32576	0.185683	7.13987	9.34163e-13	1.35454e-11	7.17749	18.4255	22.008
miR-18a	118.565	1.91946	0.198794	9.65556	4.65617e-22	2.05607e-20	2.07141	0.195877	10.5751	3.8889e-26	3.17829e-24	32.1659	136.403	122.779
miR-193a	578.676	-1.00999	0.136707	-7.38799	1.49065e-13	2.01718e-12	-1.03263	0.134637	-7.66977	1.72311e-14	3.03741e-13	1092.46	533.758	542.236
miR-194-1	22387.5	1.21425	0.21874	5.5511	2.83876e-08	1.73848e-07	1.10745	0.215438	5.14047	2.74045e-07	1.58946e-06	10407.7	22425.7	24148.7
miR-194-2	25005.2	1.28376	0.216673	5.92488	3.12534e-09	2.22217e-08	1.18222	0.213402	5.5399	3.02642e-08	2.01537e-07	11106.9	25205.3	27043.1
miR-195	156.044	-1.70384	0.175866	-9.68833	3.38013e-22	1.57552e-20	-1.57733	0.173157	-9.10925	8.29539e-20	3.3898e-18	411.539	137.51	125.895
miR-196a-1	329.199	4.79073	0.307148	15.5975	7.57235e-55	3.1766e-52	4.6694	0.302735	15.4241	1.12792e-53	5.06998e-51	13.5422	346.398	376.769
miR-196a-2	370.666	4.74251	0.30715	15.4404	8.76027e-54	2.44996e-51	4.63514	0.302707	15.3123	6.32583e-53	1.89564e-50	15.6881	392.18	422.465
miR-196b	1727.62	4.42315	0.328287	13.4735	2.24123e-41	4.70099e-39	4.30027	0.323362	13.2986	2.35772e-40	5.29897e-38	89.7783	1771.68	1929.11
miR-19a	142.689	1.49866	0.17449	8.58876	8.79102e-18	2.10733e-16	1.61052	0.171906	9.36858	7.35127e-21	3.14705e-19	51.4113	157.814	145.975
miR-200a	6986.07	1.35685	0.196206	6.91543	4.66452e-12	5.28856e-11	1.11986	0.193246	5.79502	6.83133e-09	5.16081e-08	3135.49	6814.98	8031.71
miR-202	2.16784	-1.56983	0.340085	-4.61599	3.91223e-06	1.64943e-05	-1.72699	0.33491	-5.15657	2.51514e-07	1.46826e-06	5.90345	1.7023	1.98003
miR-203a	45691.4	-1.47088	0.273427	-5.37941	7.47288e-08	4.23632e-07	-1.85026	0.269299	-6.87067	6.38994e-12	7.65941e-11	122364	33936.6	44144.4
miR-204	25.7212	-2.06008	0.343986	-5.98883	2.1136e-09	1.55553e-08	-1.92589	0.33861	-5.68764	1.28806e-08	9.19019e-08	83.4473	21.93	19.9684
miR-205	759.67	-2.20201	0.769532	-2.8615	0.00421645	0.0100791	-3.67351	0.757928	-4.84678	1.25483e-06	6.37342e-06	3651.03	286.12	793.376
miR-20a	1525.69	1.1955	0.181226	6.59674	4.2031e-11	4.1487e-10	1.45411	0.178491	8.14669	3.74035e-16	9.60734e-15	652.389	1787.09	1493.82
miR-21	917598	1.76754	0.111092	15.9106	5.34868e-57	4.48754e-54	1.85147	0.109415	16.9215	3.12129e-64	2.80604e-61	278918	1.00652e+06	949640
miR-210	1758.04	1.43697	0.290066	4.95395	7.27211e-07	3.37088e-06	1.07719	0.285692	3.77047	0.000162938	0.000597884	768.254	1621.4	2080.47
miR-217	175.477	1.03215	0.23347	4.42089	9.8293e-06	3.80036e-05	1.29866	0.229946	5.64767	1.62634e-08	1.12467e-07	81.3577	379.647	166.143
miR-218-1	63.5583	-1.32952	0.211376	-6.28986	3.17758e-10	2.7204e-09	-1.1321	0.208068	-5.44101	5.2979e-08	3.40201e-07	133.82	60.7979	52.9285
miR-218-2	61.1791	-1.35332	0.210995	-6.41398	1.41773e-10	1.279e-09	-1.11922	0.207675	-5.3893	7.07338e-08	4.38549e-07	128.833	59.0292	50.0808
miR-223	1548.36	1.15366	0.21174	5.44847	5.08057e-08	3.02264e-07	1.05511	0.208547	5.05935	4.20697e-07	2.29862e-06	763.192	1586.02	1698.14
miR-23b	4856.49	-1.08107	0.136523	-7.91858	2.4024e-15	4.1135e-14	-1.07051	0.134461	-7.96146	1.70017e-15	3.55454e-14	9268.24	4412.71	4380.44
miR-26a-1	3518.59	-1.11915	0.108	-10.3625	3.67303e-25	2.37051e-23	-1.00123	0.106367	-9.41303	4.82024e-21	2.28073e-19	6683.66	3338.24	3076.18
miR-27b	6288.19	-1.07953	0.118566	-9.10488	8.63649e-20	2.78693e-18	-1.12077	0.116775	-9.5977	8.175e-22	4.32313e-20	12291.5	5651.51	5815.52
miR-28	20516.8	-1.1189	0.127228	-8.79443	1.43777e-18	3.89126e-17	-1.12248	0.125307	-8.95784	3.31088e-19	1.1448e-17	40106.9	18421.1	18466.7
miR-29c	9611.6	-1.81104	0.170452	-10.6249	2.28269e-26	1.59598e-24	-1.65394	0.167878	-9.85207	6.71439e-23	4.02416e-21	26308.4	8359.8	7497.4
miR-301b	6.70977	1.88736	0.297049	6.35369	2.10208e-10	1.85647e-09	1.76644	0.293836	6.01165	1.83644e-09	1.55751e-08	1.80863	6.77365	7.32062
miR-30a	58651.2	-1.39593	0.189992	-7.34732	2.02221e-13	2.69307e-12	-1.39625	0.187123	-7.46168	8.54272e-14	1.37141e-12	133117	50572.9	50584.3
miR-3127	17.9873	1.30227	0.188125	6.92235	4.44197e-12	5.17613e-11	1.18882	0.185744	6.40029	1.55082e-10	1.62114e-09	7.99981	18.3667	19.7883
miR-3131	7.87601	1.50297	0.454838	3.30442	0.000951746	0.00264409	1.3537	0.448522	3.01812	0.00254345	0.00739988	3.03787	7.97374	8.82704
miR-3199-2	2.46252	-1.13328	0.185391	-6.11291	9.78326e-10	7.81729e-09	-1.21065	0.182316	-6.6404	3.12823e-11	3.42961e-10	5.29901	2.133	2.26087
miR-3200	12.167	1.46067	0.284757	5.12953	2.90469e-07	1.46809e-06	1.06398	0.281205	3.78366	0.000154542	0.000569398	5.34082	11.3088	14.8694
miR-335	364.775	1.70708	0.188794	9.042	1.5383e-19	4.78011e-18	1.65835	0.185975	8.91707	4.78785e-19	1.53724e-17	120.409	380.108	393.248
miR-363	31.0961	-1.07933	0.240722	-4.48372	7.33512e-06	2.91667e-05	-1.00898	0.236965	-4.25794	2.06321e-05	8.54758e-05	57.4193	28.5165	27.0725
miR-3651	5.17703	1.44047	0.303083	4.75273	2.00692e-06	8.81572e-06	1.50131	0.299296	5.01613	5.27222e-07	2.80457e-06	1.80777	5.67661	5.53487
miR-365a	117.907	-1.41584	0.128555	-11.0135	3.29144e-28	2.76152e-26	-1.43614	0.12657	-11.3465	7.71586e-30	7.31298e-28	276.206	101.912	103.359
miR-365b	117.65	-1.41369	0.128353	-11.0141	3.2682e-28	2.76152e-26	-1.43329	0.126371	-11.3419	8.13457e-30	7.31298e-28	275.249	101.758	103.162
miR-372	15.8964	4.14345	0.818175	5.06426	4.09991e-07	1.9999e-06	5.74526	0.806805	7.121	1.07145e-12	1.52332e-11	0.499261	328.197	65.7879
miR-378a	3626.51	-1.02393	0.156601	-6.53847	6.215e-11	5.99355e-10	-1.17767	0.154237	-7.6355	2.24942e-14	3.8889e-13	7153.74	3162.39	3517.95
miR-383	4.02719	-2.0195	0.409704	-4.92916	8.2583e-07	3.80698e-06	-2.34991	0.403898	-5.81807	5.95301e-09	4.53538e-08	14.1686	2.70963	3.57825
miR-4326	31.4904	1.55826	0.258733	6.02265	1.71581e-09	1.31926e-08	1.24879	0.255133	4.89465	9.84787e-07	5.08807e-06	12.8807	30.8024	38.1616
miR-451a	1773.4	-1.56903	0.243975	-6.43109	1.26692e-10	1.16807e-09	-1.29094	0.240287	-5.37251	7.76468e-08	4.71652e-07	4192.03	1713.26	1412.93
miR-4661	16.8931	1.92209	0.274169	7.01059	2.37313e-12	2.84436e-11	1.80119	0.270641	6.65528	2.82761e-11	3.13829e-10	4.63205	16.3301	17.7852
miR-4677	24.2821	1.13516	0.139467	8.13927	3.97663e-16	7.9438e-15	1.00866	0.137764	7.32167	2.44912e-13	3.86273e-12	12.0235	24.4236	26.76
miR-4728	10.185	2.47839	0.389792	6.35825	2.04068e-10	1.82142e-09	2.08087	0.385088	5.40362	6.531e-08	4.13477e-07	2.25895	12.9804	18.4323
miR-4746	8.88544	1.3601	0.211751	6.42313	1.33503e-10	1.21749e-09	1.23424	0.209418	5.89365	3.77761e-09	3.00537e-08	3.96341	9.07931	9.91193
miR-483	25.3345	2.06127	0.403021	5.11456	3.14477e-07	1.57992e-06	2.71309	0.397064	6.83287	8.32308e-12	9.71746e-11	4.82358	169.043	87.9428
miR-486-1	226.172	-1.70324	0.22528	-7.56054	4.01398e-14	5.80643e-13	-1.54759	0.221848	-6.9759	3.03915e-12	3.84817e-11	599.726	205.204	184.267
miR-486-2	224.325	-1.7357	0.223837	-7.7543	8.88303e-15	1.4062e-13	-1.56786	0.220425	-7.1129	1.13628e-12	1.54776e-11	603.232	203.529	181.221
miR-490	81.4602	-3.43081	0.486769	-7.04814	1.81324e-12	2.23722e-11	-2.99535	0.479303	-6.24939	4.1206e-10	3.81899e-09	441.962	55.3797	40.914
miR-500a	1016.21	1.39957	0.145362	9.62819	6.07934e-22	2.42884e-20	1.15396	0.143182	8.05942	7.66585e-16	1.8626e-14	442.756	985.59	1168.85
miR-500b	35.2689	1.12463	0.156412	7.19017	6.47117e-13	8.4833e-12	1.04339	0.154272	6.76328	1.34906e-11	1.53519e-10	17.4587	36.6108	38.9867
miR-501	193.464	1.70141	0.156399	10.8787	1.45691e-27	1.11123e-25	1.52981	0.154118	9.9262	3.20241e-23	2.21459e-21	66.7075	193.398	218.043
miR-503	27.9791	1.2967	0.200773	6.45855	1.05714e-10	9.96558e-10	1.21811	0.198006	6.15186	7.65812e-10	6.88465e-09	11.8837	28.6061	29.931
miR-504	2.47037	-1.01321	0.290746	-3.48485	0.000492414	0.00146502	-1.52747	0.288291	-5.29838	1.16836e-07	6.95601e-07	5.48546	1.86391	2.59671
miR-508	17.9964	1.958	0.326619	5.99475	2.03801e-09	1.52669e-08	1.86464	0.322153	5.78805	7.12064e-09	5.20444e-08	5.0967	21.4444	51.2209
miR-519a-1	2.19964	2.84958	0.78114	3.64797	0.000264316	0.000840006	2.96361	0.770473	3.84648	0.000119826	0.000448847	0.207782	10.0376	27.9565
miR-522	1.80977	2.60213	1.07704	2.41601	0.0156917	0.032268	3.13056	1.06072	2.95135	0.00316392	0.00900114	0.167816	16.2855	11.5749
miR-548v	5.72873	1.35104	0.287233	4.70366	2.55541e-06	1.09948e-05	1.01685	0.284294	3.57675	0.000347898	0.00123621	2.4692	5.28611	6.59997
miR-550a-2	11.7571	1.31963	0.199661	6.60937	3.85963e-11	3.90148e-10	1.06192	0.197492	5.37703	7.57251e-08	4.63108e-07	5.01106	11.3255	13.3166
miR-551b	5.88629	-2.1461	0.274742	-7.81131	5.65978e-15	9.31089e-14	-2.04945	0.269785	-7.59661	3.03978e-14	5.15615e-13	19.9902	4.77122	4.47899
miR-552	174.414	6.01989	0.520982	11.5549	6.97307e-31	8.35772e-29	6.26395	0.513758	12.1924	3.41129e-34	4.38107e-32	2.77971	211.93	178.931
miR-5586	7.28866	1.12178	0.207445	5.40759	6.3877e-08	3.69606e-07	1.16005	0.204884	5.662	1.49618e-08	1.05083e-07	3.42884	7.83611	7.6002
miR-5683	14.2014	-3.16462	0.352458	-8.97872	2.73925e-19	7.92495e-18	-2.75425	0.346339	-7.95247	1.82829e-15	3.73553e-14	68.613	10.1149	7.56349
miR-584	424.905	1.65521	0.231267	7.15713	8.23816e-13	1.06336e-11	1.53812	0.227797	6.75216	1.45659e-11	1.63685e-10	151.721	440.348	477.761
miR-592	19.506	2.19704	0.282075	7.78883	6.76333e-15	1.09124e-13	1.93777	0.278484	6.95827	3.44486e-12	4.30128e-11	4.73151	19.0556	22.6214
miR-615	12.7177	2.48743	0.328989	7.56084	4.00476e-14	5.80643e-13	2.37743	0.324967	7.31593	2.5561e-13	3.96196e-12	2.58893	13.4722	14.5243
miR-6510	7.85616	-4.06553	0.587505	-6.92	4.51641e-12	5.19077e-11	-5.28789	0.581156	-9.09891	9.1247e-20	3.56657e-18	64.4036	1.62476	3.81213
miR-6720	5.70518	-1.6363	0.266246	-6.14582	7.95531e-10	6.4801e-09	-1.45874	0.261281	-5.58301	2.36393e-08	1.60998e-07	14.6139	5.23394	4.62244
miR-675	155.751	1.55713	0.37906	4.10788	3.99299e-05	0.000141954	2.0829	0.37334	5.5791	2.41768e-08	1.63421e-07	47.6301	201.986	251.076
miR-7-2	12.029	1.18904	0.267602	4.44331	8.85867e-06	3.45694e-05	1.29248	0.263808	4.89931	9.61742e-07	4.99772e-06	5.19665	12.9323	12.0287
miR-7-3	11.5509	1.56904	0.277211	5.66009	1.51295e-08	9.68979e-08	1.70899	0.27343	6.2502	4.09919e-10	3.81899e-09	3.73598	12.687	11.4368
miR-708	268.167	1.11981	0.190921	5.8653	4.48313e-09	3.10855e-08	1.16995	0.188055	6.22131	4.9301e-10	4.52261e-09	128.36	288.074	278.167
miR-767	137.296	7.16542	0.703037	10.1921	2.15087e-24	1.20305e-22	6.78833	0.693495	9.78858	1.26049e-22	7.08236e-21	1.26053	138.194	179.46
miR-877	10.4534	1.97353	0.241199	8.18218	2.78751e-16	5.7042e-15	1.93442	0.238504	8.11065	5.03504e-16	1.25736e-14	2.9803	11.3501	11.648
miR-93	19303.8	1.22322	0.153164	7.98637	1.38967e-15	2.53463e-14	1.25826	0.150852	8.34103	7.36454e-17	2.00628e-15	8766.34	20969	20466
miR-934	7.24521	2.80835	0.629264	4.46292	8.08514e-06	3.18471e-05	2.91477	0.620813	4.69508	2.66497e-06	1.29503e-05	1.08981	8.1343	7.55907
miR-935	23.547	3.11104	0.34593	8.99329	2.39941e-19	7.18966e-18	2.67329	0.341593	7.82594	5.03863e-15	9.24434e-14	3.28992	21.4724	28.9913
miR-937	10.9671	2.65529	0.314514	8.4425	3.1062e-17	7.04352e-16	2.43696	0.311106	7.83323	4.75508e-15	8.90586e-14	2.13158	11.1534	12.9104
miR-944	8.07858	-3.07354	0.433403	-7.09164	1.32528e-12	1.68471e-11	-3.199	0.426671	-7.49759	6.50033e-14	1.06251e-12	43.8579	4.74648	9.83388
miR-96	60.0158	1.69809	0.211336	8.03504	9.35479e-16	1.82527e-14	1.6469	0.208312	7.90592	2.65952e-15	5.31312e-14	19.4663	61.7785	64.0431

[truncated: 1 more sheets: THCA]
