# Supplementary material for: Integrated Analysis of MicroRNA (miRNA) and mRNA Profiles Reveals Reduced Correlation between MicroRNA and Target Gene in Cancer
Source: Biomed Res Int. 2018 Dec 6;2018:1972606. doi: 10.1155/2018/1972606 (PMC6304515; doi:10.1155/2018/1972606)
Supplement: Supplementary Materials — Figure S1. Expression density distribution of mRNAs and miRNAs before and after filtering. Figure S2. Distribution of the PCC values of critical miRNA-target gene pairs in healthy controls and 4 clinically staged tumors. Figure S3: Simple correlations coefficients (Cor) and partial correlation coefficients (Pcor) of critical pairs in normal and tumor samples of LIHC. Figure S4: Simple correlations coefficients (Cor) and partial correlation coefficients (Pcor) of critical pairs in normal and tumor samples of LUAD. Figure S5: Simple correlations coefficients (Cor) and partial correlation coefficients (Pcor) of critical pairs in tumor samples of LIHC. Figure S6: Simple correlations coefficients (Pearson correlation coefficient) and partial correlation coefficients (given CNAs effects) of critical pairs in cancer samples of LUAD. Table S1: Sample sizes for each cancer type. Table S2. Sample clinical and grouping information for each cancer type. Table S3. List of DEMs for each cancer type. Table S4. List of DEGs for each cancer type. Table S5. Frequency of DEMs and DEGs in 11 cancer types. Table S6. List of critical miRNA-target gene pairs for each cancer type. Table S7: Interactional references and gene functional references for some critical miRNA-target pairs. Table S8. Frequency of critical miRNA-target pairs in 11 cancer types. Table S9. List of the significantly GO annotation terms (p < 0.05) for the critical target genes in each cancer type. Table S10. List of the significantly KEGG pathway terms (p < 0.05) for the critical target genes in each cancer type. Table S11. Partial and simple correlation coefficients for each critical pair in normal and tumor samples of LUAD and LIHC when controlling methylation or CNAs effect. [file 1972606.f1.zip › 1972606.f1/Table S4_BMRI_2598513.xlsx]

## Sheet: BLCA
DEGs	baseMean	log2FoldChange.early	lfcSE.early	stat.early	pvalue.early	padj.early	log2FoldChange.advanced	lfcSE.advanced	stat.advanced	pvalue.advanced	padj.advanced	Mean.HC	Mean.Early	Mean.Advanced
C1orf112	682.93	1.27229	0.228485	5.56836	2.57145e-08	2.12947e-07	1.63871	0.220956	7.41645	1.20304e-13	2.84366e-12	243.824	759.062	588.79
CFH	3759.28	-1.05607	0.340152	-3.10468	0.00190483	0.00515435	-1.29094	0.328874	-3.92532	8.66144e-05	0.000361704	8201.13	3351.72	3944.22
HS3ST1	1793.56	-1.31326	0.330497	-3.97358	7.08001e-05	0.000278696	-1.79843	0.319539	-5.62819	1.82108e-08	1.70165e-07	5052.73	1452.65	2033.37
AOC1	345.943	1.42489	0.57792	2.46555	0.0136802	0.0289734	1.33416	0.558799	2.38754	0.0169615	0.0375158	138.728	516.426	434.255
KLHL13	251.334	-2.21174	0.406257	-5.4442	5.20401e-08	4.08793e-07	-2.1838	0.392755	-5.56022	2.69442e-08	2.41166e-07	995.619	219.102	214.886
DBNDD1	1215.69	1.30618	0.314443	4.15397	3.26761e-05	0.000138503	1.81068	0.304037	5.95546	2.59334e-09	2.85122e-08	394.899	1385.73	976.814
CAMKK1	561.389	-1.00196	0.22075	-4.5389	5.65473e-06	2.88494e-05	-1.08066	0.213421	-5.06352	4.11578e-07	2.86522e-06	1114.45	526.81	556.362
HSPB6	1999.46	-5.9455	0.543698	-10.9353	7.81415e-28	1.4556e-25	-4.3851	0.525643	-8.34236	7.28236e-17	3.0373e-15	24922.7	1192.79	404.377
PDK4	1882.58	-4.11528	0.420761	-9.78057	1.3644e-22	1.1003e-20	-3.44301	0.406797	-8.46369	2.59048e-17	1.1915e-15	15483.3	1423.76	893.408
ZMYND10	77.4822	1.54789	0.396062	3.9082	9.29865e-05	0.00035419	2.31223	0.383284	6.03268	1.61267e-09	1.85766e-08	58.0388	92.9718	54.7218
ABCB5	10.301	-4.60803	0.674961	-6.82711	8.66425e-12	1.30974e-10	-3.3721	0.650131	-5.1868	2.13936e-07	1.58952e-06	86.5361	8.37144	3.4892
ARX	16.4696	4.26236	0.843057	5.05584	4.2849e-07	2.79852e-06	4.97467	0.821878	6.0528	1.42346e-09	1.65237e-08	0.545688	19.7964	12.0911
MEOX1	139.089	-2.70162	0.422632	-6.39236	1.63345e-10	2.00994e-09	-2.17716	0.408509	-5.32953	9.84669e-08	7.83726e-07	593.702	131.428	91.2862
PRKAR2B	553.528	-2.00298	0.348584	-5.74607	9.13431e-09	8.25162e-08	-1.93506	0.33701	-5.74185	9.36457e-09	9.25473e-08	1911.71	499.906	476.891
ABCB4	61.9611	-1.6926	0.260353	-6.50116	7.97008e-11	1.0383e-09	-1.33993	0.251467	-5.32843	9.90679e-08	7.87548e-07	157.054	62.0188	48.4952
ITGA3	23511.5	1.26286	0.326779	3.86457	0.000111287	0.000415475	1.1038	0.315946	3.49364	0.000476481	0.00163926	10831.2	23278.7	25992
ITGA2B	64.2128	1.11862	0.396235	2.82312	0.00475588	0.0114789	1.54194	0.383331	4.02248	5.75887e-05	0.000251395	24.6577	71.9062	53.5953
ASB4	4.07167	-1.44455	0.636078	-2.27102	0.0231457	0.0456451	-1.69646	0.614513	-2.76066	0.0057684	0.0146652	11.4692	8.46081	4.18879
KRT33A	56.9907	1.98715	0.572011	3.47397	0.000512812	0.00161646	1.48247	0.553727	2.67727	0.00742259	0.0183296	20.4975	33.0096	247.359
ABCC8	10.2375	-1.98418	0.689219	-2.87888	0.00399086	0.00984099	-3.0164	0.666563	-4.52529	6.03113e-06	3.27764e-05	50.5904	6.26227	12.7637
TMEM132A	4180.39	2.19195	0.252749	8.67243	4.22994e-18	1.70194e-16	2.25356	0.244385	9.22137	2.9334e-20	2.48234e-18	922.478	4398.65	4214.7
CX3CL1	2190.76	-1.51	0.412373	-3.66172	0.000250528	0.000852794	-1.45578	0.398698	-3.65133	0.000260889	0.000965884	5637.18	2055.07	1979.21
DLX6	156.639	2.98626	0.486309	6.14066	8.21804e-10	8.92068e-09	2.6365	0.470542	5.6031	2.10549e-08	1.93868e-07	23.7681	148.776	189.574
DBF4	745.122	1.30325	0.161018	8.09384	5.78104e-16	1.72436e-14	1.27731	0.155739	8.2016	2.37203e-16	9.05634e-15	313.725	760.62	774.432
PRSS21	232.517	1.98129	0.695658	2.84808	0.00439834	0.0107053	2.19974	0.672682	3.27011	0.00107507	0.00335176	191.146	253.515	217.883
DNAH9	10.2163	-1.94577	0.473444	-4.10983	3.95957e-05	0.000165004	-1.43934	0.456671	-3.1518	0.00162265	0.00482208	28.3176	29.6883	7.32248
GAS7	1020.71	-3.06475	0.363124	-8.43996	3.17445e-17	1.1212e-15	-1.93903	0.351054	-5.52345	3.32401e-08	2.92043e-07	4100.41	1069.36	490.017
CEACAM7	536.895	-2.92425	0.816111	-3.58316	0.000339463	0.0011212	-2.68364	0.789041	-3.40114	0.000671055	0.00221062	2899.96	1382.82	466.287
CD79B	274.908	-2.61698	0.437901	-5.97619	2.28422e-09	2.30384e-08	-2.11134	0.42333	-4.98746	6.11794e-07	4.12391e-06	1128.78	349.727	536.798
SELE	760.372	-3.24938	0.540267	-6.01439	1.8056e-09	1.85108e-08	-2.29689	0.522329	-4.39739	1.09559e-05	5.60789e-05	3660.21	744.836	384.947
E2F2	598.943	1.43987	0.308517	4.66705	3.05551e-06	1.6603e-05	1.7003	0.298335	5.6993	1.20299e-08	1.16474e-07	201.192	653.435	545.498
CYB561	6047.83	1.21695	0.154737	7.86465	3.70127e-15	9.74046e-14	1.25449	0.149614	8.38484	5.0795e-17	2.18709e-15	2621.05	6254.7	6094.06
CELSR3	1212.23	2.66707	0.338372	7.88207	3.22013e-15	8.55817e-14	2.62527	0.327211	8.02318	1.03044e-15	3.57147e-14	202.847	1251.85	1288.64
NFIX	2121.34	-2.4446	0.255583	-9.56482	1.12396e-21	7.79985e-20	-2.08583	0.247099	-8.44126	3.13938e-17	1.41729e-15	8397.38	1978.03	1542.39
PKD1	2641.16	-1.57211	0.169139	-9.29479	1.47501e-20	8.55415e-19	-1.55953	0.163525	-9.53694	1.47112e-21	1.7535e-19	7179.27	2435.55	2414.34
MAPK8IP2	398.058	1.96582	0.424153	4.6347	3.57452e-06	1.91299e-05	2.37382	0.410179	5.78729	7.15307e-09	7.19172e-08	86.8473	450.467	339.49
REV3L	894.737	-1.68992	0.191677	-8.81651	1.18087e-18	5.24553e-17	-1.56671	0.185304	-8.45482	2.79522e-17	1.27368e-15	2501.53	844.251	774.968
IYD	98.6217	2.56812	0.62176	4.13039	3.62141e-05	0.000152161	2.01894	0.601452	3.35677	0.000788576	0.0025547	21.9162	89.1311	130.423
ETV7	811.333	1.48538	0.308129	4.82064	1.431e-06	8.37646e-06	1.1909	0.297947	3.99704	6.41403e-05	0.000277393	340.957	779.135	955.557
NCAPD2	6105.35	1.10796	0.187603	5.90586	3.50812e-09	3.38908e-08	1.14099	0.181388	6.29033	3.16786e-10	4.18981e-09	2849.27	6283.19	6140.98
IFFO1	390.403	-1.60145	0.287916	-5.5622	2.66389e-08	2.20116e-07	-1.10828	0.278329	-3.98189	6.83684e-05	0.000293406	878.445	407.474	289.497
SEMA3G	403.537	-1.87988	0.280698	-6.69716	2.12512e-11	3.03658e-10	-1.68759	0.27136	-6.21902	5.00265e-10	6.36666e-09	1229.86	381.925	334.226
SLC6A13	8.04155	1.28617	0.539349	2.38466	0.0170948	0.0351516	1.2934	0.523048	2.47282	0.0134053	0.0305308	3.35607	8.28221	8.22969
FYN	1530.5	-1.77587	0.268857	-6.60526	3.96831e-11	5.44266e-10	-1.3447	0.259932	-5.17327	2.30036e-07	1.69497e-06	3947.35	1554.11	1152.56
DPF1	69.6214	1.73881	0.382999	4.53999	5.62576e-06	2.87328e-05	2.00813	0.370732	5.41666	6.07242e-08	5.02343e-07	19.0356	76.4792	63.4369
SYT7	1204.3	1.84822	0.391949	4.71547	2.41158e-06	1.34581e-05	1.74139	0.378979	4.59494	4.32865e-06	2.43501e-05	359.172	1201.36	1293.66
ANLN	3055.62	1.78617	0.272964	6.54362	6.00469e-11	7.99632e-10	2.15579	0.263929	8.16808	3.13333e-16	1.1689e-14	1761.97	3411.38	2640.35
DCN	15928.1	-3.63107	0.409238	-8.87277	7.13476e-19	3.31837e-17	-2.31525	0.395667	-5.85151	4.87137e-09	5.07058e-08	80275.3	16129.5	6479.14
GABRA3	359.414	1.15166	0.499301	2.30654	0.0210805	0.0420937	1.64517	0.482782	3.40768	0.000655183	0.00216453	127.989	400.72	284.606
BRCA1	1147.95	1.25632	0.191075	6.57499	4.86578e-11	6.54928e-10	1.44075	0.184772	7.79744	6.31768e-15	1.86272e-13	452.399	1227.3	1080.04
CD22	209.456	-2.32556	0.509903	-4.56079	5.0962e-06	2.62493e-05	-1.64011	0.492933	-3.32724	0.000877113	0.00280803	670.942	327.933	332.094
CALCOCO1	3169.5	-1.11374	0.141023	-7.8976	2.84324e-15	7.63206e-14	-1.18749	0.136344	-8.70951	3.05184e-18	1.66641e-16	6722.07	2951.16	3105.84
SLC25A39	10396.1	1.03909	0.138617	7.49612	6.57322e-14	1.41641e-12	1.05438	0.134025	7.86707	3.63047e-15	1.10888e-13	5144.15	10684.1	10571.6
DDX11	1823.23	1.41315	0.175843	8.03641	9.25052e-16	2.67e-14	1.24408	0.170038	7.31651	2.54506e-13	5.67285e-12	758.513	1797.03	2020.51
CD6	398.58	-1.28661	0.392572	-3.27739	0.00104771	0.00305003	-1.1013	0.379539	-2.90167	0.00371174	0.00993383	846.67	394.675	347.101
TACC3	5093.13	2.02763	0.242652	8.35611	6.4818e-17	2.19843e-15	1.80269	0.234617	7.68354	1.54751e-14	4.2727e-13	1432.11	4996.07	5838.85
BID	2876.01	1.33755	0.171091	7.81775	5.37771e-15	1.37854e-13	1.16846	0.165434	7.06304	1.62895e-12	3.2427e-11	1259.93	2832.82	3185.06
CHDH	301.3	1.86421	0.381445	4.88724	1.02259e-06	6.19222e-06	1.80946	0.368902	4.90498	9.34371e-07	6.1026e-06	87.8922	308.383	320.229
CLCA4	2930.92	-2.17079	0.73262	-2.96305	0.00304611	0.00776402	-2.43112	0.70833	-3.43218	0.000598748	0.00200006	12491.9	2316.25	2774.29
SLC38A5	1493.51	1.37089	0.466011	2.94176	0.00326353	0.00824883	1.40931	0.450572	3.12783	0.001761	0.00518199	584.363	1552.2	1511.41
CNTN1	889.794	-3.79884	0.587269	-6.46865	9.88816e-11	1.25965e-09	-2.90034	0.567776	-5.10824	3.25171e-07	2.31564e-06	5828.79	780.66	418.752
WWTR1	2821.95	-2.41244	0.224907	-10.7264	7.65175e-27	1.1785e-24	-2.03006	0.217442	-9.33608	9.9964e-21	9.39469e-19	10841.7	2654.45	2036.3
ATP1A2	533.647	-6.29644	0.639463	-9.84644	7.10115e-23	6.01039e-21	-4.32266	0.618137	-6.99305	2.68983e-12	5.17528e-11	6627.9	331.346	84.3162
PRDM11	458.552	-1.07541	0.240465	-4.47218	7.74246e-06	3.81739e-05	-1.22637	0.232483	-5.2751	1.32687e-07	1.02682e-06	977.94	417.829	463.897
SYT13	38.761	2.85006	0.836492	3.40716	0.000656432	0.00201806	3.20137	0.809742	3.95356	7.69969e-05	0.000326281	4.59781	110.071	63.6474
HGF	324.201	-2.92624	0.494923	-5.91251	3.36929e-09	3.27348e-08	-1.3061	0.478418	-2.73005	0.00633245	0.0159355	940.512	380.279	123.722
ADGRA2	1663.32	-2.99078	0.312688	-9.56473	1.12494e-21	7.79985e-20	-2.18489	0.302304	-7.22747	4.9209e-13	1.05015e-11	7404.31	1628.38	931.414
SAMD4A	796.011	-2.53468	0.295166	-8.58729	8.90481e-18	3.40777e-16	-2.28605	0.28536	-8.01111	1.13678e-15	3.87813e-14	3456.05	708.649	596.344
CYP3A43	4.06892	1.95094	0.61714	3.16127	0.00157083	0.00434573	1.98739	0.601699	3.30296	0.000956685	0.003031	1.0782	7.13171	7.40338
SLC7A9	28.6322	1.47499	0.385855	3.82265	0.000132026	0.00048161	1.11934	0.3738	2.9945	0.00274895	0.00764607	12.4078	26.9715	34.4854
FHL1	3767.53	-5.10448	0.465201	-10.9726	5.17439e-28	1.02344e-25	-4.13586	0.449768	-9.19554	3.7311e-20	3.0517e-18	41853.7	2380.8	1216.51
NLRP2	3383.72	1.41854	0.631593	2.24598	0.0247055	0.0483408	1.99723	0.610657	3.27063	0.00107308	0.00334609	985.615	3935.28	2634.95
PLEKHO1	3093.85	-1.63167	0.277666	-5.87637	4.19361e-09	3.99179e-08	-1.287	0.268456	-4.79409	1.63416e-06	1.00772e-05	7587.41	3109.34	2448.56
EHD2	6241.44	-1.32678	0.28697	-4.62342	3.77471e-06	2.00812e-05	-1.00371	0.277454	-3.61756	0.000297393	0.0010846	12780	6373.49	5094.72
DEPDC1	783.053	1.79268	0.269742	6.6459	3.01374e-11	4.21028e-10	1.84369	0.260854	7.06792	1.57273e-12	3.14031e-11	228.166	817.958	789.569
HSD17B6	305.752	-3.02601	0.362576	-8.34586	7.06948e-17	2.37631e-15	-2.52855	0.350493	-7.21426	5.42276e-13	1.14847e-11	1577.6	273.408	193.685
TYMP	8137.02	1.55843	0.389002	4.00624	6.16924e-05	0.000246167	1.6975	0.376107	4.51333	6.38173e-06	3.44613e-05	2678.3	8686.76	7888.52
KCNG1	2142.69	2.24749	0.49494	4.54092	5.60082e-06	2.86286e-05	3.19045	0.478554	6.66685	2.61344e-11	4.237e-10	290.266	2650.44	1378.64
ARNTL2	2242.84	1.00241	0.3047	3.28981	0.00100255	0.00293153	1.06939	0.294606	3.62989	0.000283538	0.0010385	1112.21	2333.94	2228.04
IBSP	45.1722	3.20594	0.501674	6.39049	1.65351e-10	2.02936e-09	3.85124	0.487106	7.90636	2.65016e-15	8.34224e-14	3.65593	207.923	45.4678
HMGB3	4877.52	1.95485	0.199773	9.78538	1.30103e-22	1.05372e-20	2.00729	0.193163	10.3917	2.70556e-25	7.05177e-23	1269.73	5105.53	4923.3
MUSK	10.5275	-3.10695	0.460272	-6.75025	1.4759e-11	2.15982e-10	-2.3204	0.443179	-5.2358	1.64269e-07	1.24801e-06	49.8482	10.1264	5.82498
FAM13B	1205.41	-1.31102	0.185792	-7.05638	1.70901e-12	2.88002e-11	-1.5853	0.179628	-8.82547	1.08997e-18	6.43706e-17	3130.3	1042.86	1261.2
LRRC7	34.6489	-1.91936	0.27906	-6.87793	6.07286e-12	9.41494e-11	-1.82664	0.269475	-6.77853	1.21405e-11	2.07579e-10	112.839	31.645	29.6749
MYOC	77.3673	-4.90814	0.739473	-6.63735	3.19376e-11	4.43867e-10	-5.9936	0.714993	-8.38274	5.17098e-17	2.22159e-15	1191.18	18.774	39.5809
VCL	9440.35	-1.99293	0.194683	-10.2368	1.35665e-24	1.49949e-22	-1.88519	0.188226	-10.0156	1.30226e-23	2.35708e-21	31765.3	8598.91	7980.07
DEPDC1B	561.199	2.20906	0.247733	8.9171	4.78676e-19	2.29447e-17	2.16348	0.239636	9.02821	1.74505e-19	1.19692e-17	128.551	575.723	594.239
MYOM2	73.9912	-2.65841	0.344339	-7.72033	1.16025e-14	2.83132e-13	-2.78551	0.332801	-8.36989	5.76712e-17	2.45612e-15	396.195	57.4335	62.7875
OTC	1.8616	-3.56217	0.933372	-3.81645	0.000135385	0.000492716	-3.30076	0.898708	-3.67278	0.000239922	0.000897091	13.5631	1.40346	1.1565
CYP46A1	25.1461	-1.75193	0.32539	-5.38409	7.28134e-08	5.55261e-07	-1.40473	0.314097	-4.47228	7.73888e-06	4.10306e-05	66.5667	25.0622	19.6442
USP2	150.545	-1.84721	0.372891	-4.95374	7.27994e-07	4.54151e-06	-2.13141	0.3605	-5.91237	3.37223e-09	3.62599e-08	541.321	123.578	150.468
HOXC8	54.9133	2.6171	0.54403	4.81058	1.50493e-06	8.76834e-06	3.20674	0.526948	6.0855	1.1613e-09	1.37167e-08	7.01828	64.3142	42.7525
BEST2	5.7922	2.91179	0.718085	4.05494	5.01479e-05	0.00020442	3.2439	0.701107	4.62682	3.71316e-06	2.12174e-05	3.34156	9.63374	14.0542
PQLC2	1139.64	1.22291	0.139832	8.74551	2.22007e-18	9.3742e-17	1.23911	0.135238	9.16245	5.07308e-20	3.95139e-18	497.801	1175.04	1162.06
RTN4R	342.739	2.21205	0.312313	7.08279	1.41279e-12	2.41112e-11	2.30326	0.302117	7.62374	2.46426e-14	6.58079e-13	73.231	361.986	339.811
ZIC2	253.394	3.35805	0.575637	5.83363	5.42355e-09	5.08272e-08	3.91175	0.556904	7.0241	2.1545e-12	4.20742e-11	56.6577	295.906	201.539
EPHA3	374.934	-3.26634	0.369362	-8.84319	9.30212e-19	4.23213e-17	-2.49193	0.35705	-6.9792	2.96863e-12	5.68373e-11	1965.39	349.353	204.217
GPM6B	281.554	-2.1841	0.297978	-7.32974	2.30608e-13	4.54205e-12	-1.66375	0.288031	-5.77628	7.63717e-09	7.65204e-08	890.562	281.111	195.852
MAGEC2	116.983	2.78371	1.17146	2.37627	0.0174885	0.0358625	6.01175	1.1337	5.30277	1.14061e-07	8.95085e-07	5.43544	267.603	101.716
PREX2	236.243	-1.96662	0.329254	-5.97296	2.32989e-09	2.34236e-08	-2.00896	0.318303	-6.31148	2.7638e-10	3.703e-09	832.735	207	213.02
ARHGAP6	385.019	-1.49071	0.427493	-3.4871	0.000488295	0.00154782	-2.41378	0.413327	-5.83989	5.22361e-09	5.39414e-08	1400	262.729	498.114
ROS1	38.4216	3.80483	0.772375	4.92614	8.38692e-07	5.16511e-06	4.77369	0.74972	6.36729	1.92392e-10	2.64293e-09	1.77463	185.313	55.655
CC2D2A	526.315	-1.90488	0.200314	-9.50945	1.91668e-21	1.28623e-19	-1.71518	0.193638	-8.85766	8.17089e-19	4.96039e-17	1626.67	495.247	434.14
LMO3	536.72	-4.33186	0.489596	-8.84782	8.92419e-19	4.07004e-17	-3.60214	0.473319	-7.61038	2.73296e-14	7.20971e-13	4762.31	392.197	236.481
CELF2	724.548	-2.93219	0.341828	-8.57797	9.65662e-18	3.66561e-16	-2.56942	0.330471	-7.77503	7.54281e-15	2.19089e-13	3750.49	631.827	491.332
KITLG	1168.73	-1.57909	0.359177	-4.39642	1.10053e-05	5.2311e-05	-1.28751	0.34726	-3.70762	0.000209216	0.000793995	2835.95	1161.7	949.072
PER3	844.999	-1.60845	0.269806	-5.96151	2.49915e-09	2.49252e-08	-1.56474	0.26085	-5.99862	1.99003e-09	2.24343e-08	2327.17	786.485	763.055
ELN	2436.22	-2.86377	0.435046	-6.58267	4.62064e-11	6.25517e-10	-1.89644	0.420613	-4.50874	6.52145e-06	3.51867e-05	9387.43	2521.58	1289.62
NEXMIF	27.5291	-2.29656	0.579872	-3.96045	7.48082e-05	0.00029266	-2.69063	0.560551	-4.79997	1.58688e-06	9.82587e-06	133.405	20.607	27.0715
NFE2L3	1918.95	1.39925	0.278234	5.02904	4.92938e-07	3.1884e-06	1.70235	0.269025	6.32783	2.48632e-10	3.36583e-09	649.114	2112.92	1712.54
LAMC3	784.241	-2.419	0.337485	-7.1677	7.62657e-13	1.37527e-11	-2.51717	0.326285	-7.71462	1.21343e-14	3.42281e-13	3651.45	637.848	682.829
PTGER3	216.263	-3.37027	0.485203	-6.94611	3.75496e-12	6.03041e-11	-2.05478	0.468987	-4.38133	1.17958e-05	5.99853e-05	945.021	227.444	91.3697
HOMER3	2786	1.28528	0.217734	5.90299	3.56982e-09	3.44107e-08	1.20767	0.210526	5.73644	9.66879e-09	9.54091e-08	1216.56	2810.14	2965.46
RAD51	732.435	1.70676	0.208071	8.20274	2.34967e-16	7.40778e-15	1.88088	0.201245	9.34622	9.08328e-21	8.66146e-19	213.231	785.056	695.769
POLQ	659.52	2.20597	0.235085	9.38374	6.36724e-21	3.85937e-19	2.35957	0.227401	10.3762	3.18102e-25	8.03619e-23	137.89	706.661	635.289
PRSS8	4561.26	1.8017	0.374056	4.81667	1.45971e-06	8.52063e-06	2.20915	0.361661	6.10834	1.00673e-09	1.20217e-08	1111.56	5140.27	3875.56
FOXN3	2544.93	-1.73715	0.172529	-10.0687	7.59386e-24	7.50993e-22	-1.69673	0.166803	-10.172	2.64304e-24	5.38188e-22	7569.09	2334.65	2270.08
METTL24	21.6122	-4.31741	0.445653	-9.68783	3.39673e-22	2.53272e-20	-3.50772	0.429617	-8.16475	3.22089e-16	1.19472e-14	185.965	16.312	9.26753
ENTPD2	294.914	1.05532	0.418262	2.5231	0.0116325	0.025135	1.39354	0.404439	3.44563	0.000569737	0.00191295	123.281	323.869	256.18
PTPRN	84.4713	1.60668	0.547102	2.93671	0.00331713	0.00836405	3.01887	0.529285	5.70367	1.17252e-08	1.14032e-07	13.6567	126.834	52.6538
KCNH2	417.706	-3.41069	0.543745	-6.27259	3.55101e-10	4.0985e-09	-2.33659	0.525666	-4.44501	8.78871e-06	4.59819e-05	2082.22	412.183	195.713
CCDC85A	15.6423	-1.28401	0.471497	-2.72325	0.00646424	0.0150549	-1.18897	0.455548	-2.60998	0.00905483	0.0218307	34.6364	15.1096	14.1688
IL17RB	281.066	1.35021	0.312621	4.31899	1.56746e-05	7.18179e-05	1.1763	0.302341	3.89063	9.99833e-05	0.00041069	122.78	277.667	313.066
PRDM1	1273.91	-1.89203	0.299649	-6.31415	2.71648e-10	3.19524e-09	-1.54249	0.289703	-5.3244	1.01289e-07	8.03248e-07	3653.95	1254.42	984.544
LAMC2	15957.8	2.34072	0.498189	4.69845	2.6214e-06	1.44743e-05	2.95034	0.481675	6.12516	9.05908e-10	1.09245e-08	2426.59	18756.1	12292.2
PPP1R12A	3389.38	-2.0909	0.157097	-13.3096	2.03635e-40	2.94331e-37	-1.97419	0.151882	-12.9982	1.25249e-38	4.08062e-35	12015.8	3057.79	2820.07
RASGRF1	178.603	1.36827	0.447931	3.05464	0.00225329	0.00597383	1.9276	0.433184	4.44984	8.59335e-06	4.51081e-05	54.1922	206.509	140.044
CAMK2B	61.1019	1.43516	0.487198	2.94573	0.0032219	0.00816225	2.10528	0.471355	4.46645	7.95288e-06	4.20449e-05	16.7996	106.623	69.9594
ATP2B4	6701.9	-2.28945	0.257768	-8.88182	6.57755e-19	3.07443e-17	-1.98237	0.249219	-7.95431	1.80129e-15	5.89809e-14	24701.7	6251.22	5052.69
DGKG	180.723	-2.82485	0.389703	-7.24871	4.20759e-13	7.93781e-12	-2.45783	0.3767	-6.52463	6.81676e-11	1.02032e-09	881.558	160.416	124.345
PARP12	3042.99	1.33032	0.21774	6.10968	9.98311e-10	1.07313e-08	1.19647	0.210532	5.68308	1.32292e-08	1.27141e-07	1323.93	3034.76	3329.79
TARBP1	1932.56	1.02682	0.176219	5.82697	5.64418e-09	5.27108e-08	1.08736	0.170392	6.38154	1.75315e-10	2.43162e-09	943.066	2004.22	1921.93
SLC2A3	2576.23	-2.39378	0.372504	-6.42618	1.30852e-10	1.64133e-09	-1.48029	0.360145	-4.11026	3.95215e-05	0.000179083	7710.97	2763.79	1467.25
PSD	794.363	-4.67034	0.393978	-11.8543	2.04324e-32	7.38317e-30	-3.60145	0.380865	-9.45599	3.19994e-21	3.39959e-19	7250.71	597.373	284.708
CREB3L3	10.7807	1.36463	0.609411	2.23926	0.0251388	0.0490762	1.8159	0.590422	3.07559	0.00210085	0.0060491	3.42325	12.2191	13.7069
COL11A1	1777.71	4.13305	0.562298	7.35029	1.97783e-13	3.9247e-12	6.15984	0.543865	11.326	9.7517e-30	4.88785e-27	34.5858	2474.69	607.264
PRDM6	303.584	-3.64187	0.396077	-9.19484	3.75548e-20	2.10643e-18	-3.16076	0.382879	-8.25524	1.51599e-16	5.92693e-15	2148.28	240.226	172.053
SPAG4	1087.18	1.87019	0.308492	6.06237	1.3413e-09	1.40877e-08	1.66534	0.298299	5.58279	2.36691e-08	2.15302e-07	336.337	1067.35	1230.19
CDH3	9094.1	2.56669	0.444818	5.7702	7.91759e-09	7.21142e-08	2.83979	0.430076	6.603	4.02926e-11	6.34682e-10	1400.96	10030.2	8300.36
ARSF	14.648	-3.72899	0.670926	-5.55797	2.72928e-08	2.25223e-07	-3.29904	0.647887	-5.092	3.54299e-07	2.50392e-06	110.21	11.1562	8.30991
POLD1	2125.48	1.36208	0.163405	8.3356	7.71083e-17	2.58726e-15	1.41076	0.15801	8.9283	4.32586e-19	2.76346e-17	831.321	2210.42	2137
AHRR	141.875	-1.07534	0.337923	-3.1822	0.00146162	0.00408385	-1.31398	0.326703	-4.02194	5.77218e-05	0.000251807	314.544	126.625	149.394
DLX3	255.949	1.29785	0.497366	2.60944	0.00906896	0.0202638	1.7409	0.480935	3.61982	0.000294809	0.00107618	85.3189	404.968	209.877
TSPAN32	44.604	-1.01132	0.378345	-2.67301	0.00751751	0.0172156	-1.01793	0.365711	-2.78344	0.00537865	0.0138054	86.5069	42.7807	42.9666
WISP2	442.515	-3.66656	0.549763	-6.66934	2.56959e-11	3.62482e-10	-2.05808	0.531465	-3.87246	0.00010774	0.000439046	1984.07	476.513	156.236
DMRT3	11.2167	2.10356	0.676668	3.1087	0.0018791	0.00509741	2.87193	0.656743	4.37299	1.22559e-05	6.21633e-05	1.8987	16.355	10.1346
CDON	256.542	-2.4725	0.369601	-6.68967	2.23679e-11	3.17682e-10	-2.14659	0.357293	-6.00793	1.8791e-09	2.13438e-08	1045.78	236.184	188.361
NTN1	504.827	-1.66136	0.457221	-3.6336	0.00027949	0.000941996	-1.60142	0.44205	-3.6227	0.00029154	0.00106504	1427.07	470.252	451.081
GLP2R	104.42	-6.20813	0.540239	-11.4914	1.45647e-30	4.02457e-28	-5.1571	0.521822	-9.88286	4.94005e-23	7.60379e-21	1565.84	43.9218	21.1752
MCM10	762.221	1.89237	0.264948	7.14242	9.17007e-13	1.62552e-11	2.16264	0.256231	8.44021	3.16771e-17	1.4235e-15	186.523	834.95	692.26
ANKRD44	407.757	-1.51769	0.249406	-6.08522	1.16328e-09	1.23701e-08	-1.35078	0.241107	-5.60242	2.11378e-08	1.94539e-07	1008.36	395.295	352.097
MYLK	9341.44	-4.98859	0.410052	-12.1658	4.73001e-34	1.97504e-31	-4.04089	0.396452	-10.1926	2.13911e-24	4.49628e-22	100163	6085.24	3154.9
TMEM206	730.797	1.33338	0.164393	8.11094	5.02312e-16	1.51015e-14	1.52821	0.159005	9.61106	7.18076e-22	8.77309e-20	271.705	783.566	684.658
ASB1	946.024	-1.0042	0.160553	-6.25462	3.98473e-10	4.55709e-09	-1.0831	0.155222	-6.97779	2.99853e-12	5.72974e-11	1879.41	886.805	936.46
ME1	1065.23	-1.76636	0.346969	-5.09081	3.56533e-07	2.3689e-06	-1.11624	0.33545	-3.32758	0.000876038	0.00280642	2465.25	1137.08	724.56
ASPM	1468.92	2.03831	0.272811	7.47152	7.92727e-14	1.69073e-12	2.25922	0.263804	8.56403	1.08989e-17	5.36652e-16	333.068	1593.94	1367.67
MPPED2	304.656	-1.29613	0.464902	-2.78797	0.00530399	0.0126218	-1.64356	0.449483	-3.65656	0.000255619	0.000947807	809.808	259.211	329.789
CLDN18	31.3747	1.82384	0.523035	3.48704	0.000488399	0.00154782	1.69606	0.506385	3.34936	0.000809997	0.00261714	23.6705	62.7481	51.6013
EML1	687.208	-2.90367	0.305611	-9.5012	2.07492e-21	1.37281e-19	-2.32487	0.295444	-7.86906	3.57323e-15	1.09654e-13	3202.54	639.14	427.847
KIF26A	175.66	-1.89643	0.367614	-5.15875	2.48601e-07	1.70731e-06	-1.11054	0.355322	-3.12544	0.00177539	0.00521728	413.213	191.413	170.713
MYO9A	1204.81	-1.14791	0.157715	-7.27838	3.37846e-13	6.49093e-12	-1.04146	0.152474	-6.83044	8.46575e-12	1.49494e-10	2419.98	1175.34	1091.66
KLF6	10822.5	-1.86218	0.216044	-8.61948	6.72613e-18	2.61124e-16	-1.50675	0.208879	-7.21353	5.45203e-13	1.15342e-11	30348.4	10679.7	8347.67
CACNB1	629.675	1.14371	0.249577	4.58261	4.59212e-06	2.39284e-05	1.00021	0.241341	4.1444	3.40703e-05	0.000156781	311.857	623.828	689.034
PRKCZ	1255.44	1.10519	0.187656	5.88944	3.87509e-09	3.71116e-08	1.00857	0.181459	5.55809	2.72741e-08	2.43672e-07	623.576	1255.7	1342.72
NAV3	116.906	-2.53847	0.444188	-5.71486	1.09797e-08	9.75451e-08	-1.74164	0.429309	-4.05686	4.97379e-05	0.000219922	403.66	120.722	69.3935
PDZD4	197.7	-3.119	0.440305	-7.08371	1.40341e-12	2.40165e-11	-2.54908	0.425621	-5.98908	2.11026e-09	2.36398e-08	1042.04	177.955	119.904
ATP2B3	3.45693	-1.47226	0.542945	-2.71162	0.00669558	0.0155187	-1.3048	0.523392	-2.49297	0.0126679	0.0290478	8.23383	14.2389	9.50532
ROCK1	2520.64	-1.44399	0.163725	-8.81959	1.14878e-18	5.11719e-17	-1.31203	0.15829	-8.28877	1.14427e-16	4.57425e-15	6027.73	2427.05	2214.84
HDAC4	667.844	-2.23152	0.199913	-11.1625	6.22509e-29	1.34448e-26	-2.09262	0.193256	-10.8282	2.53026e-27	8.10844e-25	2553.48	598.539	543.465
MEF2A	1669.57	-1.17327	0.16135	-7.2716	3.55266e-13	6.79781e-12	-1.13804	0.155993	-7.29544	2.97677e-13	6.58257e-12	3508.86	1593.87	1555.36
INPP5A	1492.15	-1.48083	0.171322	-8.64352	5.45065e-18	2.14263e-16	-1.34845	0.165631	-8.14125	3.91225e-16	1.43483e-14	3645.31	1431.38	1305.82
PRR11	1295.89	1.78755	0.244748	7.30364	2.8008e-13	5.47058e-12	2.0346	0.236672	8.59669	8.20499e-18	4.11259e-16	344.6	1411.15	1189.06
REEP1	261.125	-4.90717	0.496008	-9.89334	4.44925e-23	3.92495e-21	-3.57065	0.47941	-7.44801	9.47614e-14	2.28691e-12	2399.73	201.934	79.9152
STON1-GTF2A1L	8.22539	-4.69883	0.491679	-9.5567	1.21572e-21	8.36756e-20	-3.22696	0.47047	-6.85901	6.934e-12	1.24583e-10	65.7981	7.0289	2.54301
RASGRP2	322.361	-2.7098	0.375824	-7.21029	5.58317e-13	1.03561e-11	-2.25646	0.363314	-6.21078	5.27239e-10	6.67598e-09	1425.14	298.273	217.855
PYGM	206.959	-5.39353	0.418887	-12.8759	6.15475e-38	5.02816e-35	-4.46108	0.40478	-11.021	3.02657e-28	1.11629e-25	2554.19	116.002	60.7404
PITX1	2821.33	-1.66957	0.383118	-4.35786	1.3134e-05	6.12681e-05	-1.57874	0.370413	-4.2621	2.02519e-05	9.83806e-05	7908.14	2647.41	2485.86
ABCC9	273.117	-3.17756	0.361007	-8.80192	1.34491e-18	5.90442e-17	-2.36137	0.348944	-6.76717	1.31328e-11	2.23624e-10	1341.07	260.961	148.159
GAL	155.929	3.16487	0.68555	4.61654	3.90188e-06	2.06875e-05	4.17203	0.663337	6.28946	3.18565e-10	4.21048e-09	10.8241	265.352	97.1585
MAOB	705.572	-4.2195	0.496705	-8.495	1.97936e-17	7.15233e-16	-2.99542	0.480192	-6.23797	4.43276e-10	5.72335e-09	4913.84	616.212	263.764
RORA	450.775	-1.57372	0.283309	-5.5548	2.77937e-08	2.28854e-07	-1.35653	0.27389	-4.95283	7.31414e-07	4.86315e-06	1128.81	440.704	379.044
TGFBR3	2286.44	-2.05658	0.330706	-6.21875	5.01128e-10	5.63169e-09	-2.29133	0.319739	-7.16625	7.70774e-13	1.59609e-11	9107.39	1860.5	2189.29
HES2	1644.16	1.32587	0.54674	2.42504	0.0153068	0.0319607	1.89615	0.528622	3.58697	0.000334547	0.00120282	511.061	1902.51	1281.32
RAB27A	1042.18	-1.23986	0.194178	-6.38519	1.71185e-10	2.09276e-09	-1.03041	0.187726	-5.4889	4.04451e-08	3.48137e-07	2124.72	1040.04	899.409
FGF10	39.5609	-4.27581	0.654798	-6.52997	6.57845e-11	8.711e-10	-3.80436	0.63272	-6.01271	1.82449e-09	2.07476e-08	371.758	26.629	19.1655
FGF22	10.726	1.44955	0.451363	3.21149	0.00132047	0.00372714	1.92809	0.438193	4.40009	1.08207e-05	5.54305e-05	3.20631	12.2288	8.79599
CNGB1	133.845	3.66294	0.497433	7.36369	1.78893e-13	3.58095e-12	3.85603	0.481763	8.00399	1.20454e-15	4.06674e-14	10.0042	145.854	127.612
PTPN21	853.617	-1.44469	0.193611	-7.4618	8.53481e-14	1.81003e-12	-1.17385	0.187172	-6.27151	3.57556e-10	4.6878e-09	1921	851.102	705.408
CAMK2A	47.6846	-4.76862	0.480813	-9.91783	3.48252e-23	3.11602e-21	-3.42234	0.464041	-7.37509	1.64235e-13	3.77702e-12	412.179	38.4227	15.1097
EPHA8	7.14336	1.92882	0.732074	2.63474	0.00842023	0.0190027	3.20112	0.711542	4.49885	6.83219e-06	3.6681e-05	1.00745	11.5495	11.7608
ARHGAP10	1522.5	-1.56982	0.208296	-7.5365	4.8276e-14	1.06718e-12	-1.53033	0.201382	-7.59913	2.9813e-14	7.81211e-13	4083.87	1413.74	1375.56
RPS6KA2	1359.87	-1.69634	0.238981	-7.09819	1.264e-12	2.17695e-11	-1.69727	0.23105	-7.34589	2.04399e-13	4.59263e-12	4015.15	1238.12	1238.91
LMCD1	2029.26	-2.71167	0.340418	-7.96571	1.64279e-15	4.55279e-14	-1.86343	0.329119	-5.66188	1.49725e-08	1.42286e-07	7560.03	2077.77	1154.05
TRIP13	1516.14	1.99942	0.271444	7.36587	1.75996e-13	3.53308e-12	2.14873	0.262479	8.18629	2.69408e-16	1.01864e-14	366.426	1624.37	1464.73
CYBRD1	2782.58	-2.8329	0.319854	-8.85686	8.23006e-19	3.79026e-17	-2.06278	0.30924	-6.67048	2.54969e-11	4.15344e-10	11521	2757.59	1616.94
CDH19	88.6559	-3.70997	0.728156	-5.09502	3.48706e-07	2.32265e-06	-2.60445	0.703817	-3.70047	0.000215201	0.000813843	509.463	83.7524	38.9221
ACTN1	15436.9	-1.79256	0.263653	-6.79894	1.05394e-11	1.57421e-10	-1.39147	0.254911	-5.45866	4.79738e-08	4.06322e-07	40738.4	15528.3	11759.3
LIMS2	1547.57	-3.98437	0.342759	-11.6244	3.09765e-31	9.38787e-29	-3.19495	0.331374	-9.64152	5.3391e-22	6.91183e-20	11533.6	1259.52	728.717
SPEG	969.767	-3.65427	0.435111	-8.39848	4.52301e-17	1.57093e-15	-2.98006	0.420663	-7.08419	1.39861e-12	2.81276e-11	6447.6	817.153	512.067
SREBF1	9614.21	1.14662	0.249178	4.60162	4.19223e-06	2.20465e-05	1.10787	0.240919	4.5985	4.25545e-06	2.39728e-05	4518.89	9739.1	10004.3
HMMR	955.76	1.94512	0.252306	7.70937	1.26443e-14	3.05176e-13	2.05066	0.243997	8.40444	4.29896e-17	1.88421e-15	244.559	1012.48	941.127
ACAP1	650.562	-1.10989	0.321916	-3.44776	0.000565266	0.00176611	-1.03987	0.311234	-3.34113	0.000834394	0.00268445	1299.54	632.118	602.202
EVC	585.718	-1.90611	0.333964	-5.70752	1.14632e-08	1.00981e-07	-1.39091	0.322865	-4.30801	1.64726e-05	8.14637e-05	1575.07	600.52	420.093
MRVI1	1430.99	-3.76558	0.349926	-10.7611	5.25558e-27	8.22936e-25	-2.85963	0.338302	-8.4529	2.84149e-17	1.29175e-15	9188.74	1265.98	675.609
MCM2	4331.07	1.70208	0.226003	7.53123	5.02663e-14	1.10727e-12	1.91263	0.218522	8.75259	2.08513e-18	1.15468e-16	1244.46	4685.14	4048.92
PANX2	641.682	1.22506	0.406099	3.01666	0.00255578	0.00667359	1.43603	0.392661	3.65718	0.00025501	0.000945908	255.809	692.153	598.043
FERMT2	1918.29	-3.35698	0.311806	-10.7662	4.96906e-27	7.8461e-25	-2.69913	0.301454	-8.9537	3.43757e-19	2.24741e-17	11052.6	1701.94	1078.67
DHRS9	507.382	1.50537	0.592165	2.54215	0.0110173	0.0239956	1.35314	0.572561	2.36331	0.0181127	0.0396491	197.908	505.672	726.846
PTGS2	3991.87	-2.60882	0.437708	-5.96018	2.51965e-09	2.50499e-08	-2.45518	0.423193	-5.80156	6.57006e-09	6.65448e-08	18643.1	3399.65	3056.25
IGF2BP2	1381.26	2.14134	0.487029	4.39674	1.0989e-05	5.22742e-05	2.41308	0.470907	5.12434	2.98587e-07	2.14667e-06	286.006	1523.57	1261.99
FRY	1966.64	-1.08296	0.323413	-3.34855	0.000812368	0.0024287	-1.55565	0.31269	-4.97505	6.52309e-07	4.37439e-06	4787.45	1628.55	2259.89
GLI2	169.017	-1.94073	0.428764	-4.52635	6.00125e-06	3.04684e-05	-1.17847	0.414457	-2.84342	0.00446327	0.011708	413.669	182.723	107.679
CDHR2	21.219	1.12715	0.365119	3.08708	0.00202131	0.00542886	1.79745	0.353783	5.08066	3.76118e-07	2.64378e-06	7.18277	31.0953	15.6998
MGLL	2208.39	-2.2153	0.319572	-6.93209	4.14673e-12	6.59755e-11	-1.83616	0.30897	-5.94285	2.80107e-09	3.06067e-08	7575.04	2121.52	1631.21
TACR2	219.848	-5.05417	0.45553	-11.0951	1.32464e-28	2.82842e-26	-4.17512	0.440265	-9.48318	2.4664e-21	2.70861e-19	2459.24	136.158	74.009
SEMA3A	402.757	-2.50777	0.402755	-6.22654	4.76853e-10	5.38466e-09	-1.75141	0.389355	-4.49823	6.85213e-06	3.67578e-05	1389.79	412.731	244.234
GTSE1	911.899	2.41162	0.228591	10.5499	5.08497e-26	7.02549e-24	2.34194	0.221104	10.592	3.24496e-26	9.06179e-24	183.296	928.348	974.343
WNT8B	19.9058	1.47222	0.564264	2.60911	0.00907789	0.0202793	1.24933	0.546292	2.28693	0.0221998	0.0472622	16.229	34.2166	22.4842
CACNG4	650.85	2.44756	0.605436	4.04265	5.2851e-05	0.000214255	3.12128	0.585428	5.33162	9.73417e-08	7.75401e-07	88.9225	773.964	485.207
FSCN1	14969.7	1.46784	0.321452	4.56627	4.96477e-06	2.56356e-05	1.42111	0.310796	4.57247	4.82005e-06	2.68129e-05	5688.4	15233.3	15734.7
ATP12A	74.9338	3.21251	0.724908	4.43161	9.35318e-06	4.52837e-05	3.72311	0.701706	5.3058	1.12182e-07	8.80695e-07	20.6486	168.351	120.713
WDR62	817.051	1.29402	0.251502	5.14519	2.67249e-07	1.82272e-06	1.51921	0.243199	6.24679	4.18969e-10	5.43825e-09	308.757	884.015	756.236
SPAG5	2474.02	2.05254	0.219534	9.34955	8.8021e-21	5.25052e-19	2.11134	0.212282	9.94592	2.62737e-23	4.35253e-21	600.68	2595.01	2491.37
ACACB	725.224	-2.67835	0.289377	-9.25557	2.13085e-20	1.22069e-18	-2.85207	0.279769	-10.1943	2.10151e-24	4.46526e-22	3985.31	552.024	622.579
MCAM	5241.78	-2.20854	0.258495	-8.54385	1.29821e-17	4.82083e-16	-1.93775	0.249921	-7.75345	8.94296e-15	2.57084e-13	18781.4	4902.31	4063.33
MBNL3	1521.39	-1.12345	0.252677	-4.44618	8.74111e-06	4.26058e-05	-1.19899	0.244296	-4.90796	9.20308e-07	6.01276e-06	3216.44	1400.83	1476.14
RAP1GAP	1636.07	1.19441	0.396154	3.015	0.00256977	0.00670731	1.10555	0.38303	2.88632	0.00389772	0.0103833	759.346	1634.34	1738.14
NMRK2	1.8621	-3.65049	0.715126	-5.10468	3.31363e-07	2.21813e-06	-2.72383	0.683301	-3.98628	6.7118e-05	0.000288801	11.2702	1.68123	0.911573
RARB	379.63	-1.76122	0.360971	-4.87911	1.06563e-06	6.42182e-06	-1.0737	0.34896	-3.07685	0.00209202	0.00603244	859.234	408.131	253.417
UBE2T	1087.5	1.6401	0.197989	8.28379	1.19314e-16	3.91258e-15	1.8793	0.191473	9.81495	9.70816e-23	1.45981e-20	321.436	1181.79	1001.31
PPP1R12B	4679.93	-4.4497	0.32704	-13.606	3.68889e-42	7.70158e-39	-3.80628	0.316189	-12.038	2.24365e-33	2.19295e-30	44720.7	3196.7	2046.45
DCX	3.19322	-3.04933	0.66948	-4.55477	5.24419e-06	2.69737e-05	-2.22019	0.643118	-3.45223	0.000555983	0.00187095	14.6347	32.8589	12.7376
SPAG6	23.4393	2.2481	0.636728	3.5307	0.000414455	0.00133785	2.52722	0.616845	4.09702	4.18511e-05	0.000188678	4.44201	25.9035	27.0104
ACTN2	93.5347	-5.16747	0.587831	-8.79073	1.48593e-18	6.46313e-17	-4.32002	0.56804	-7.60514	2.84594e-14	7.48753e-13	1097.01	54.9426	30.5022
NAALAD2	61.2089	-1.46257	0.295661	-4.94676	7.54595e-07	4.69654e-06	-1.07106	0.285643	-3.74963	0.000177097	0.000682955	132.096	62.9061	47.8532
JADE1	1259.23	-1.3107	0.21184	-6.18721	6.1239e-10	6.78468e-09	-1.05268	0.204805	-5.13991	2.74873e-07	1.99525e-06	2617.94	1261.93	1055.22
FGFR1	2510.89	-2.48629	0.389741	-6.37933	1.77859e-10	2.16871e-09	-1.97829	0.376813	-5.25006	1.5205e-07	1.1624e-06	9559.98	2426.25	1706.05
SMC1B	137.085	2.34847	0.451586	5.20048	1.9877e-07	1.38895e-06	2.96705	0.436986	6.7898	1.12289e-11	1.93735e-10	20.5332	161.11	104.897
FBLN1	41182.6	-1.08319	0.383717	-2.82288	0.00475939	0.0114829	-1.00561	0.370995	-2.71059	0.00671638	0.0167785	80581.7	40134.3	38033.3
ITGA8	550.807	-3.32924	0.35234	-9.44894	3.42265e-21	2.15811e-19	-3.48707	0.340639	-10.2369	1.35576e-24	2.9447e-22	4152.06	370.346	413.129
AMPH	84.9692	-1.69542	0.408373	-4.15165	3.30088e-05	0.000139755	-1.18562	0.394693	-3.00389	0.00266551	0.00745107	201.367	88.4819	62.115
ADCY2	84.0095	-2.28469	0.49773	-4.59022	4.42776e-06	2.31297e-05	-2.39945	0.481162	-4.98678	6.13923e-07	4.13684e-06	365.928	69.3731	75.0329
ADCYAP1R1	29.6926	-3.68182	0.474958	-7.75188	9.05419e-15	2.24148e-13	-2.78502	0.458438	-6.07501	1.23978e-09	1.45383e-08	183.835	26.6513	14.2439
ITM2A	692.114	-2.97268	0.427336	-6.95629	3.49354e-12	5.64041e-11	-1.78858	0.413129	-4.32934	1.49559e-05	7.44862e-05	2565.36	742.79	326.807
TNRC6C	600.887	-1.07409	0.197725	-5.43222	5.5656e-08	4.33932e-07	-1.13755	0.191158	-5.95086	2.66741e-09	2.92771e-08	1240.47	563.69	589.058
TP53INP2	2191.38	-2.21416	0.250774	-8.8293	1.05328e-18	4.74609e-17	-2.35833	0.242455	-9.72686	2.31631e-22	3.25749e-20	9264.18	1806.55	1996.31
BPIFB2	5.03526	4.47582	1.15295	3.88204	0.000103584	0.000389581	2.91708	1.12131	2.60151	0.0092815	0.0222729	0.337692	20.3046	28.7465
TP73	503.394	2.09002	0.397551	5.25724	1.46231e-07	1.04714e-06	1.7676	0.384439	4.59786	4.26856e-06	2.40397e-05	141.368	481.408	601.99
RUNX1T1	149.105	-3.37534	0.387411	-8.71253	2.97154e-18	1.22446e-16	-2.42818	0.374384	-6.4858	8.82631e-11	1.29922e-09	770.531	143.133	74.1555
CDH17	27.1406	-2.32249	0.495782	-4.68449	2.8066e-06	1.53929e-05	-1.20547	0.478621	-2.51862	0.0117816	0.0273037	70.1755	359.228	18.8213
TNS1	9877.54	-5.0443	0.379687	-13.2854	2.81379e-40	3.77651e-37	-4.08646	0.367095	-11.1319	8.77424e-29	3.57331e-26	107761	6343.25	3265.65
PAFAH1B3	3501.5	1.77	0.228518	7.74557	9.51532e-15	2.34945e-13	1.59856	0.220955	7.23478	4.66276e-13	9.98332e-12	1145.15	3468.57	3906.3
KIF22	4448.07	1.11521	0.183154	6.08889	1.13695e-09	1.21107e-08	1.17499	0.177089	6.63503	3.2444e-11	5.18574e-10	2049.1	4626.86	4439.07
EPB41L2	1549.82	-1.73352	0.249576	-6.94585	3.76195e-12	6.03647e-11	-1.32056	0.24129	-5.47291	4.427e-08	3.7724e-07	3923.15	1570.67	1179.6
RIMS1	13.0519	-1.90501	0.64832	-2.93838	0.00329933	0.00832474	-1.56495	0.626313	-2.49867	0.0124661	0.0286522	38.0503	12.8386	10.0943
DCT	3.97961	-2.80829	0.622952	-4.50804	6.54282e-06	3.29508e-05	-2.73432	0.600604	-4.55262	5.29813e-06	2.92152e-05	21.6678	3.24245	3.02404
EPHA6	24.5323	-3.37183	0.582561	-5.78794	7.1253e-09	6.54372e-08	-2.67426	0.562632	-4.75313	2.00293e-06	1.21067e-05	140.505	21.9563	13.529
SCTR	8.25507	1.22103	0.546358	2.23485	0.0254274	0.0495984	1.36717	0.529677	2.58114	0.00984758	0.0234328	3.41174	17.6347	26.3952
MID2	316.499	-1.41215	0.192196	-7.34743	2.02049e-13	4.00054e-12	-1.28686	0.18578	-6.92677	4.30567e-12	7.99308e-11	745.816	305.379	279.935
CPB2	9.03907	2.23978	0.597614	3.74787	0.000178344	0.000631327	2.22589	0.580814	3.83237	0.000126917	0.000507356	1.89695	9.37579	9.45951
KCNN2	58.6414	-1.97998	0.391565	-5.05658	4.26838e-07	2.79064e-06	-2.55802	0.378561	-6.75722	1.4066e-11	2.38476e-10	252.821	42.8717	63.9958
RBL1	898.868	1.04882	0.17383	6.0336	1.60346e-09	1.66275e-08	1.22295	0.168101	7.27509	3.4618e-13	7.5695e-12	410.433	957.515	848.581
IGSF9B	51.3536	-3.58827	0.437359	-8.20441	2.31733e-16	7.3304e-15	-3.55737	0.42263	-8.41723	3.85499e-17	1.69724e-15	411.957	34.9521	34.2166
NDC80	1189.79	1.8238	0.246545	7.39743	1.3885e-13	2.83894e-12	1.9405	0.238412	8.13928	3.97649e-16	1.45294e-14	329.312	1263.29	1165.12
CXCL2	480.173	-2.69025	0.503133	-5.347	8.94242e-08	6.70795e-07	-2.05955	0.486423	-4.23407	2.29497e-05	0.000110091	1948.82	467.494	301.946
COL4A4	238.705	-2.60282	0.450084	-5.78297	7.33925e-09	6.72377e-08	-2.10743	0.435104	-4.84351	1.27563e-06	8.07773e-06	976.903	226.639	160.731
ARG2	466.343	-1.35595	0.30156	-4.49645	6.90961e-06	3.46033e-05	-1.95481	0.291562	-6.70461	2.01946e-11	3.34829e-10	1399.97	361.145	546.986
MEF2C	723.401	-2.17012	0.274322	-7.91082	2.55698e-15	6.90312e-14	-1.86675	0.265204	-7.03892	1.93729e-12	3.80222e-11	2499.52	685.311	555.378
LRP2	53.536	1.41308	0.541928	2.60751	0.00912027	0.0203527	2.90967	0.524367	5.54892	2.87433e-08	2.55863e-07	9.30198	79.2651	44.6799
PCDHB4	138.785	-1.115	0.390202	-2.85749	0.00427006	0.0104346	-1.07776	0.377231	-2.85702	0.00427641	0.0112616	282.271	133.683	130.259
PCDHGA2	50.7392	-1.55759	0.325336	-4.78764	1.68752e-06	9.72652e-06	-1.01633	0.314261	-3.23402	0.00122062	0.00374991	108.798	53.675	36.8714
IL12RB2	115.737	1.76089	0.510339	3.45044	0.000559671	0.00175008	1.89941	0.493612	3.84798	0.000119098	0.000479333	33.1885	123.748	112.397
SMARCD3	801.299	-1.01625	0.265501	-3.82766	0.000129366	0.000473001	-1.05407	0.256691	-4.10637	4.01933e-05	0.000181875	1577.74	759.877	780.048
PGR	77.9981	-3.55007	0.399716	-8.88146	6.59866e-19	3.07665e-17	-3.28597	0.386258	-8.50719	1.78197e-17	8.47543e-16	570.595	58.4789	48.7026
COL19A1	49.656	-5.60936	0.635544	-8.82608	1.0841e-18	4.87325e-17	-3.86776	0.613519	-6.30422	2.8964e-10	3.86477e-09	524.16	35.8711	10.7116
KCNK2	35.3006	-2.89937	0.57231	-5.06608	4.06093e-07	2.66894e-06	-2.28931	0.552972	-4.14001	3.47292e-05	0.000159663	162.652	33.2401	21.7817
ERC1	2426.77	-1.4265	0.190765	-7.47777	7.55971e-14	1.61601e-12	-1.3336	0.184435	-7.23073	4.80388e-13	1.02742e-11	5833.26	2314.12	2169.81
EPYC	63.8119	3.14674	0.807322	3.89775	9.70894e-05	0.000368101	5.85413	0.783344	7.47325	7.82386e-14	1.90462e-12	1.63812	111.583	18.4221
SLCO1A2	106.42	2.23549	0.676632	3.30385	0.000953682	0.00280544	2.66636	0.654467	4.0741	4.61935e-05	0.000206068	19.0258	121.098	89.8327
EFR3B	98.9131	-2.03991	0.365425	-5.5823	2.37359e-08	1.97606e-07	-1.59799	0.353169	-4.52473	6.04725e-06	3.28386e-05	296.704	97.9154	72.0856
GCKR	42.7364	1.72922	0.534346	3.23614	0.00121158	0.00346244	1.93109	0.517121	3.73431	0.000188231	0.000721477	12.1534	63.2175	54.8481
FCN1	178.455	-1.9206	0.449721	-4.27065	1.94906e-05	8.74053e-05	-1.44608	0.434748	-3.32626	0.000880194	0.00281646	492.901	180.962	130.252
IGSF9	2730.37	2.14955	0.345016	6.23029	4.65577e-10	5.26682e-09	2.14137	0.333594	6.41909	1.37093e-10	1.94618e-09	635.837	2805.81	2821.81
ABCB1	133.081	-1.89452	0.295477	-6.41174	1.43865e-10	1.7914e-09	-1.93983	0.285613	-6.7918	1.10744e-11	1.91238e-10	445.949	116.278	120.011
ORC1	516.622	1.94756	0.239474	8.13264	4.20036e-16	1.27917e-14	2.16199	0.231647	9.33314	1.02779e-20	9.52987e-19	125.261	560.204	482.81
RAD54L	574.699	2.17026	0.232721	9.32558	1.10374e-20	6.481e-19	2.31358	0.225129	10.2767	8.97815e-25	2.0173e-22	123.428	613.052	555.057
SNX10	757.252	1.4615	0.284761	5.13236	2.86127e-07	1.93812e-06	1.84982	0.275362	6.7178	1.84484e-11	3.07967e-10	235.515	849.301	648.898
ALG9	362.712	-1.02096	0.128418	-7.95029	1.86083e-15	5.12682e-14	-1.02873	0.124127	-8.28773	1.15429e-16	4.60491e-15	707.406	346.04	347.811
PPP1R15A	7355.32	-1.49174	0.219207	-6.80517	1.00931e-11	1.51599e-10	-1.35234	0.211938	-6.38081	1.76149e-10	2.43864e-09	18029.4	7061.46	6411.13
TMPRSS11E	897.527	-2.7558	0.631064	-4.36691	1.26016e-05	5.90772e-05	-2.48837	0.610132	-4.07841	4.53441e-05	0.000202834	4199.06	748.342	621.787
GNAO1	284.257	-3.75965	0.447055	-8.40981	4.10673e-17	1.43965e-15	-3.35875	0.432172	-7.77179	7.7384e-15	2.23442e-13	2187.74	213.204	161.405
KLHL42	1585.16	-1.64917	0.163075	-10.113	4.83944e-24	4.94202e-22	-1.57565	0.157657	-9.99413	1.61705e-23	2.79736e-21	4391.71	1472.96	1399.68
PTHLH	1862.27	1.614	0.593196	2.72085	0.00651145	0.015148	1.88467	0.573538	3.28604	0.00101606	0.0031912	554.081	2045.96	2250.75
PHACTR3	93.9014	1.18098	0.506232	2.33288	0.0196542	0.039629	1.5357	0.489583	3.13675	0.0017083	0.00504745	35.8171	104.035	103.768
AURKA	1589.29	2.29023	0.225755	10.1447	3.49708e-24	3.67096e-22	2.37668	0.218321	10.8862	1.34155e-27	4.44486e-25	323.81	1680.67	1582.93
RFX2	724.04	-1.26138	0.201269	-6.2671	3.67823e-10	4.23752e-09	-1.47313	0.194588	-7.57047	3.71865e-14	9.60267e-13	1782.46	642.231	743.651
DNMT3B	898.808	2.06404	0.294666	7.00468	2.47548e-12	4.08737e-11	2.28011	0.284955	8.00163	1.22783e-15	4.13822e-14	200.167	973.19	837.843
TPX2	5352.88	2.31846	0.259233	8.94355	3.76849e-19	1.84401e-17	2.41312	0.250651	9.62739	6.12674e-22	7.67728e-20	1062.84	5660.27	5300.85
PDRG1	1552.5	1.04635	0.156496	6.68612	2.29169e-11	3.24988e-10	1.06227	0.151329	7.01959	2.22521e-12	4.33684e-11	762.419	1591.76	1574.26
SLC15A1	712.813	2.80791	0.483332	5.80949	6.26649e-09	5.81468e-08	2.52019	0.467377	5.39219	6.96042e-08	5.68584e-07	120.653	692.781	845.723
C3orf18	209.344	-1.72933	0.239064	-7.23375	4.69835e-13	8.81937e-12	-1.59823	0.231075	-6.91649	4.62972e-12	8.54597e-11	598.13	197.439	180.203
ARHGAP28	273.949	-1.45422	0.375534	-3.87242	0.00010776	0.000403588	-1.06219	0.363045	-2.92577	0.00343605	0.00929531	588.116	281.676	214.641
SLC4A11	1278.82	1.33893	0.349663	3.8292	0.000128559	0.000470513	1.08886	0.338087	3.22064	0.00127903	0.00390175	580.469	1235.13	1468.72
C20orf194	1321.81	-1.21461	0.192436	-6.31177	2.7586e-10	3.24166e-09	-1.37996	0.18605	-7.41714	1.1968e-13	2.83251e-12	3087.76	1186.34	1330.28
LHX5	68.8343	4.35381	0.583558	7.4608	8.59963e-14	1.82172e-12	4.62159	0.566546	8.15747	3.42107e-16	1.26179e-14	2.99429	75.8154	62.9514
TBX5	107.731	-3.30525	0.422619	-7.82088	5.24541e-15	1.34831e-13	-2.85414	0.408451	-6.98772	2.79383e-12	5.36481e-11	654.491	90.4647	66.1552
HEPH	788.071	-2.86103	0.37102	-7.71126	1.24585e-14	3.01281e-13	-1.77314	0.358683	-4.94346	7.67478e-07	5.09082e-06	2866.92	838.761	394.554
CDIP1	937.612	-1.30158	0.329273	-3.95288	7.72155e-05	0.000300825	-1.20922	0.318349	-3.79842	0.000145623	0.000574265	2094.56	905.888	849.786
CMTM1	40.8786	1.17329	0.23933	4.90239	9.46795e-07	5.77419e-06	1.28135	0.232018	5.52265	3.33926e-08	2.9298e-07	17.7552	42.9677	39.7894
BIRC5	3315.17	1.7689	0.258839	6.83399	8.25853e-12	1.25143e-10	1.96792	0.250271	7.86315	3.74581e-15	1.14233e-13	914.758	3577.69	3116.67
LTBP4	4526.22	-2.56352	0.273059	-9.38816	6.10561e-21	3.71276e-19	-2.46827	0.264002	-9.34943	8.81189e-21	8.44682e-19	21245.2	3839.15	3593.89
IRAK3	404.666	-1.3439	0.315906	-4.25412	2.09868e-05	9.3446e-05	-1.0514	0.305407	-3.44262	0.000576099	0.00193266	849.251	409.794	334.54
TFAP4	959.345	1.23135	0.156896	7.84815	4.22219e-15	1.10494e-13	1.11536	0.151739	7.35056	1.97378e-13	4.46052e-12	441.781	956.878	1036.99
KIF4A	1480.16	2.21474	0.240405	9.21252	3.18568e-20	1.80843e-18	2.29803	0.232482	9.88476	4.84749e-23	7.52054e-21	317.109	1558.97	1471.55
DLL3	45.4389	2.77511	0.577221	4.8077	1.52679e-06	8.88183e-06	3.06256	0.559173	5.47694	4.32753e-08	3.69893e-07	5.9973	63.3232	75.8161
NAT14	1131.97	1.14849	0.242192	4.74206	2.11556e-06	1.19553e-05	1.1517	0.234184	4.91794	8.74608e-07	5.7372e-06	524.499	1165.11	1162.44
PITPNM2	775.595	-1.33327	0.220503	-6.04651	1.48018e-09	1.54772e-08	-1.19217	0.213177	-5.59239	2.23965e-08	2.04678e-07	1724.41	754.504	684.159
NRCAM	433.925	2.39475	0.494955	4.83831	1.30949e-06	7.72033e-06	2.64853	0.478646	5.53338	3.14113e-08	2.77464e-07	73.5372	461.411	539.285
SLC26A3	2.91895	-2.24935	0.458861	-4.90203	9.48511e-07	5.78278e-06	-1.33201	0.437762	-3.04277	0.00234413	0.00665645	8.25715	22.6423	1.68071
IL5RA	10.6392	-1.22374	0.44546	-2.74714	0.00601176	0.0141184	-1.0044	0.430114	-2.3352	0.0195331	0.0422476	21.4068	10.682	9.14727
MAP3K20	3089.9	-3.49683	0.265163	-13.1875	1.03568e-39	1.02423e-36	-3.01531	0.256362	-11.7619	6.1323e-32	4.61055e-29	20395.3	2522.4	1806.55
SMPX	27.5941	-3.8684	0.616171	-6.27813	3.42662e-10	3.96955e-09	-3.26721	0.595194	-5.48932	4.03481e-08	3.47456e-07	207.97	21.6622	14.2455
APOH	15.0731	6.13931	1.14961	5.34036	9.276e-08	6.92751e-07	5.19015	1.11788	4.64284	3.43658e-06	1.97699e-05	0.344027	24.6958	29.1677
PITPNM3	393.481	-1.06102	0.372708	-2.84678	0.0044164	0.0107437	-1.25726	0.360345	-3.48905	0.000484735	0.00166268	853.036	356.766	408.769
ORC6	759.551	2.01774	0.22967	8.78535	1.55877e-18	6.73319e-17	2.13663	0.222139	9.61848	6.68116e-22	8.26604e-20	183.518	806.911	743.059
ZFHX4	362.524	-2.51725	0.455643	-5.5246	3.30238e-08	2.68739e-07	-1.9347	0.440497	-4.39208	1.1227e-05	5.73315e-05	1361.23	355.998	237.658
ESR1	316.731	-3.16791	0.427949	-7.40255	1.33596e-13	2.74646e-12	-2.82969	0.413714	-6.83971	7.93537e-12	1.41404e-10	1871.25	263.193	208.191
CD200	542.144	-2.13704	0.344138	-6.20986	5.30329e-10	5.92091e-09	-1.71036	0.3327	-5.14085	2.73494e-07	1.98598e-06	1741.17	532.071	395.701
CCDC80	5093.44	-3.536	0.446531	-7.91881	2.39786e-15	6.4922e-14	-2.40743	0.431721	-5.57636	2.45607e-08	2.22248e-07	26509.2	4996.81	2285.26
CMA1	51.9656	-4.27636	0.70323	-6.08102	1.1942e-09	1.26774e-08	-2.91162	0.679451	-4.28525	1.82531e-05	8.9449e-05	356.429	47.4184	18.3678
TEKT2	34.6178	1.43669	0.442765	3.24482	0.00117527	0.00337201	1.71084	0.428637	3.99136	6.56958e-05	0.000283368	11.5164	44.4671	31.34
CLSPN	436.804	1.71252	0.298142	5.74397	9.24812e-09	8.35042e-08	1.84678	0.288341	6.40486	1.50511e-10	2.10758e-09	129.242	464.31	423.022
UNC13D	4604.87	1.6668	0.327397	5.09105	3.56078e-07	2.36755e-06	1.69939	0.316549	5.3685	7.93962e-08	6.43198e-07	1467.32	4765.69	4659.2
DPYSL2	2294.13	-1.99586	0.270515	-7.378	1.60688e-13	3.2431e-12	-1.51363	0.261538	-5.78742	7.14763e-09	7.19104e-08	6610.81	2315.28	1657.38
CDC45	1035.95	2.11544	0.242784	8.71328	2.95212e-18	1.21913e-16	2.18715	0.234796	9.31511	1.21825e-20	1.10252e-18	239.307	1089.5	1036.63
KRT31	73.6394	2.51336	0.811937	3.09551	0.00196475	0.00529111	3.38191	0.785548	4.30516	1.66863e-05	8.24114e-05	24.6748	431.394	74.8198
CDC6	1819.87	1.93321	0.219354	8.81319	1.21631e-18	5.39018e-17	2.05173	0.212115	9.67274	3.93687e-22	5.23523e-20	465.577	1930.13	1777.88
FMO2	91.0071	-2.23238	0.485682	-4.59638	4.29896e-06	2.25258e-05	-1.29807	0.469393	-2.76542	0.00568491	0.0144774	245.199	99.6921	178.054
PTGS1	3377.8	-4.64642	0.473976	-9.80306	1.09223e-22	9.04093e-21	-4.21836	0.458255	-9.20525	3.40863e-20	2.81147e-18	36983.3	1986.78	1476.65
TLL2	106.167	2.38614	0.464982	5.1317	2.87144e-07	1.9436e-06	2.63174	0.449981	5.84857	4.95832e-09	5.13919e-08	18.8311	116.547	98.313
CYP26A1	22.4634	2.37043	0.625478	3.78979	0.000150774	0.000543247	3.55478	0.606865	5.85762	4.6956e-09	4.91379e-08	7.03283	79.3461	20.1084
SORBS1	3821.29	-5.20643	0.449276	-11.5885	4.71337e-31	1.38382e-28	-4.09165	0.434369	-9.41977	4.52083e-21	4.62687e-19	42204.7	2475.42	1143.01
MYO3A	71.7946	2.36802	0.824056	2.87361	0.00405804	0.00997914	2.58658	0.797074	3.2451	0.0011741	0.00362809	22.3844	93.5732	79.5917
CREM	1041.68	-1.55618	0.188156	-8.27066	1.33215e-16	4.35325e-15	-1.42083	0.181903	-7.81092	5.67712e-15	1.69171e-13	2664.9	995.478	906.345
TPSD1	55.2078	-3.16231	0.596763	-5.29911	1.1637e-07	8.49091e-07	-2.30368	0.57669	-3.99465	6.47888e-05	0.000279764	264.101	53.504	29.5021
SMIM24	46.018	2.44018	0.435288	5.6059	2.0718e-08	1.75199e-07	2.04638	0.421737	4.85226	1.22061e-06	7.75952e-06	10.2911	80.6127	56.7878
TREM2	396.807	1.70959	0.369142	4.63125	3.63458e-06	1.94071e-05	2.12721	0.356983	5.95885	2.54022e-09	2.80226e-08	102.708	448.999	336.222
FKBP5	2839.23	-1.72563	0.344252	-5.01269	5.36751e-07	3.44687e-06	-1.32963	0.332834	-3.99489	6.47251e-05	0.000279551	7215.64	2870.85	2181.72
ITPR3	4612.47	1.48949	0.241989	6.15518	7.49902e-10	8.19224e-09	1.36018	0.233974	5.81341	6.12143e-09	6.2401e-08	1794.37	4606.86	5038.88
SIRT1	915.025	-1.01985	0.149643	-6.81519	9.41424e-12	1.41969e-10	-1.11328	0.144673	-7.69512	1.41363e-14	3.91967e-13	1842.89	851.607	908.497
ABL1	4143.81	-1.79995	0.148944	-12.0848	1.27129e-33	4.97656e-31	-1.61283	0.144	-11.2002	4.06888e-29	1.80769e-26	12033.8	3934.2	3455.55
CDC7	702.335	1.50155	0.209848	7.15542	8.34179e-13	1.49094e-11	1.47607	0.202949	7.2731	3.51329e-13	7.67349e-12	258.761	720.236	733.142
SYDE2	228.662	-1.48277	0.258406	-5.73814	9.57218e-09	8.6058e-08	-1.4174	0.249796	-5.67425	1.39301e-08	1.33053e-07	573.437	214.523	205.015
SCD	21804.6	1.67984	0.345556	4.86126	1.16644e-06	6.97338e-06	1.84187	0.334101	5.5129	3.52962e-08	3.08573e-07	6475.48	23212.2	20746.4
ABLIM1	5058.72	-1.59237	0.242852	-6.55698	5.49101e-11	7.34349e-10	-1.72079	0.234799	-7.32877	2.3227e-13	5.19498e-12	14717.2	4464.91	4880.54
MAGEB2	24.5963	3.00699	0.947416	3.17388	0.00150414	0.00418645	4.3905	0.918511	4.78002	1.75279e-06	1.07342e-05	1.53517	115.111	132.393
EFNA2	26.4403	1.64285	0.681225	2.41162	0.015882	0.0329567	2.67501	0.659377	4.05688	4.97316e-05	0.000219922	5.13071	33.001	16.1337
HCN2	47.782	1.03157	0.347094	2.97202	0.00295852	0.00757468	1.43747	0.3359	4.27947	1.87339e-05	9.16212e-05	19.783	53.5227	40.4343
CDHR5	50.4032	1.33867	0.531639	2.51802	0.0118018	0.0254599	1.4215	0.514293	2.76399	0.00570997	0.0145299	19.5576	88.2533	81.2625
RASSF7	3359.07	1.40251	0.244681	5.73198	9.92665e-09	8.89046e-08	1.15208	0.236578	4.86979	1.11719e-06	7.17204e-06	1459.7	3244.7	3859.89
GADD45B	3048.85	-3.14096	0.310238	-10.1244	4.30779e-24	4.44744e-22	-2.51872	0.299944	-8.39731	4.56842e-17	1.99338e-15	15907	2775.9	1803.46
PALM	776.297	-1.81819	0.409723	-4.43762	9.09597e-06	4.41636e-05	-1.1641	0.39612	-2.93876	0.00329527	0.00896408	1854.42	827.557	525.893
RANBP1	4988.72	1.07612	0.166219	6.47411	9.5371e-11	1.22226e-09	1.11525	0.160715	6.93931	3.9401e-12	7.37044e-11	2379.04	5154.08	5016.08
MMP11	8455.56	4.21998	0.47681	8.85044	8.71768e-19	3.98553e-17	5.76044	0.461043	12.4944	8.01454e-36	1.04445e-32	208.216	11286.6	3880.05
SEC14L2	808.422	1.27538	0.308927	4.1284	3.65292e-05	0.000153279	1.48982	0.298713	4.98747	6.11766e-07	4.12391e-06	310.897	873.251	752.646
LGALS2	82.2898	-1.1895	0.418188	-2.84441	0.00444937	0.0108155	-1.0237	0.404251	-2.53233	0.0113307	0.0264028	165.626	81.5711	72.701
TTC28	969.423	-1.3251	0.257574	-5.14455	2.6816e-07	1.82761e-06	-1.26257	0.249025	-5.07005	3.97714e-07	2.78357e-06	2213.34	922.476	883.349
CENPM	772.28	1.51465	0.241843	6.26296	3.77742e-10	4.3438e-09	1.51754	0.233872	6.48877	8.65409e-11	1.27579e-09	277.848	795.124	793.607
2018-09-03	407.51	2.16799	0.469974	4.613	3.96889e-06	2.09835e-05	2.42495	0.454482	5.33563	9.52127e-08	7.59681e-07	83.1714	446.997	374.05
KDELR3	1253.54	1.09799	0.295471	3.71606	0.000202354	0.000705292	1.46428	0.28569	5.12542	2.96868e-07	2.13666e-06	503.631	1389.86	1078.1
MIOX	27.3511	4.11666	0.5573	7.38679	1.50415e-13	3.04887e-12	3.47445	0.542369	6.40606	1.49331e-10	2.09256e-09	2.15953	24.2076	37.819
RHBDD3	1490.19	1.01289	0.158832	6.37712	1.80447e-10	2.19598e-09	1.02316	0.153588	6.66171	2.70664e-11	4.36906e-10	751.658	1527.86	1516.99
RASL10A	108.916	1.9618	0.412265	4.75858	1.9496e-06	1.10975e-05	1.90075	0.398887	4.76515	1.88716e-06	1.1478e-05	29.7431	111.357	116.117
CBX7	1342.35	-2.38262	0.230099	-10.3547	3.98308e-25	4.79757e-23	-2.52559	0.222462	-11.3529	7.17149e-30	3.68916e-27	6216.1	1079.5	1191.9
ACR	4.69766	-1.27175	0.347454	-3.6602	0.000252017	0.000857552	-1.18707	0.334554	-3.5482	0.000387867	0.00136909	10.3233	4.54402	4.27074
CABP7	64.5738	2.29621	0.45922	5.00023	5.72607e-07	3.65714e-06	2.25144	0.444578	5.06421	4.10108e-07	2.85702e-06	24.7486	66.4364	92.2004
APOL4	2849.84	1.03532	0.36984	2.79936	0.00512039	0.0122329	1.05093	0.357583	2.93899	0.0032928	0.00895986	1401.3	2903.6	2872.37
PNPLA3	26.958	3.26391	0.511318	6.38333	1.73273e-10	2.11552e-09	2.76408	0.496662	5.56532	2.61676e-08	2.3486e-07	3.56756	24.2061	34.2567
CACNA1I	180.329	1.88105	0.57051	3.29713	0.000976779	0.00286418	1.42019	0.551706	2.57419	0.0100476	0.0238334	61.2678	164.114	225.909
GRAP2	97.5922	-1.31444	0.368594	-3.56608	0.000362356	0.00118618	-1.15734	0.3563	-3.24821	0.00116132	0.00359315	213.519	95.768	85.89
PVALB	468.145	3.8516	0.764234	5.03982	4.65958e-07	3.02639e-06	2.18276	0.738997	2.95368	0.00314011	0.00859468	227.362	578.184	906.635
CTSG	155.488	-3.90628	0.600054	-6.50987	7.52165e-11	9.87065e-10	-2.64384	0.580003	-4.55832	5.15654e-06	2.8531e-05	926.451	148.292	61.7886
COCH	305.038	1.39304	0.451775	3.08349	0.0020459	0.0054855	1.85203	0.436858	4.23944	2.24075e-05	0.000107701	95.8991	346.362	251.966
POLE2	344.095	1.59712	0.205355	7.77738	7.40401e-15	1.8624e-13	1.63019	0.198682	8.20501	2.30568e-16	8.83753e-15	115.67	357.649	349.509
CDKL1	61.7528	-1.99659	0.234287	-8.522	1.56816e-17	5.75649e-16	-1.94157	0.2263	-8.57962	9.51883e-18	4.72269e-16	212.932	55.3587	53.2715
CDKN3	666.596	1.50377	0.256708	5.85791	4.6872e-09	4.4369e-08	1.60913	0.248249	6.4819	9.05726e-11	1.32921e-09	230.903	703.637	654.112
CCDC198	154.825	4.0054	1.03524	3.86907	0.000109252	0.000408525	3.87755	1.00131	3.87247	0.000107737	0.000439046	36.0812	172.949	166.637
PLEK2	1641.44	1.30401	0.329722	3.95488	7.65726e-05	0.000298692	1.07892	0.318803	3.38429	0.000713633	0.00233552	754.69	1594.64	1863.93
SAMD15	57.4828	1.37062	0.237841	5.76277	8.27454e-09	7.52195e-08	1.58947	0.230518	6.89522	5.37831e-12	9.78913e-11	20.5302	62.0863	53.3201
SIX4	544.778	1.78412	0.235544	7.57444	3.60673e-14	8.15529e-13	1.54131	0.227819	6.76549	1.32863e-11	2.2604e-10	182.461	532.226	629.732
GALNT16	166.809	-2.07422	0.5087	-4.0775	4.55224e-05	0.00018717	-1.55679	0.491769	-3.16569	0.00154717	0.00462235	496.248	168.693	117.821
ASB2	397.327	-3.62174	0.418518	-8.65373	4.98426e-18	1.98e-16	-3.44719	0.404606	-8.51986	1.59746e-17	7.69142e-16	3090.42	283.348	251.055
SLC10A1	17.3676	1.49166	0.632243	2.35931	0.0183088	0.0373211	1.64286	0.612079	2.68406	0.00727335	0.0180088	5.92619	83.3623	62.2937
SERPINA4	11.8054	4.16975	1.10341	3.77896	0.000157485	0.000565369	4.07746	1.07286	3.80054	0.000144381	0.000569827	0.443591	22.2117	14.0716
SLC8A3	13.3278	-2.7229	0.510834	-5.33031	9.80472e-08	7.29337e-07	-2.38141	0.493089	-4.82958	1.3682e-06	8.60538e-06	62.081	11.9246	9.40773
TCL1A	80.297	-2.26942	0.724779	-3.13118	0.00174103	0.00476809	-1.60972	0.700636	-2.29752	0.0215891	0.0461532	251.73	163.429	78.7378
BDKRB1	158.591	-2.89663	0.40447	-7.16154	7.97774e-13	1.4326e-11	-2.40578	0.390956	-6.15358	7.57546e-10	9.24953e-09	764.18	144.289	102.608
RPS6KA5	647.942	-1.54161	0.236434	-6.52027	7.01787e-11	9.25374e-10	-1.63297	0.228582	-7.14393	9.06985e-13	1.85652e-11	1804.59	581.771	619.773
CPNE6	19.46	-3.21447	0.651289	-4.93556	7.9923e-07	4.94486e-06	-4.06253	0.629702	-6.45152	1.10737e-10	1.60347e-09	166.969	10.0171	18.0188
PCK2	3049.31	1.18857	0.192006	6.19027	6.00605e-10	6.6659e-09	1.11927	0.185651	6.02889	1.65092e-09	1.8939e-08	1414.06	3072.66	3223.84
SEC23A	2755.94	-1.42279	0.183179	-7.76721	8.02323e-15	1.99942e-13	-1.08915	0.177099	-6.14997	7.7497e-10	9.44459e-09	5953.73	2798.02	2220.27
NFATC4	1380.77	-1.70823	0.273764	-6.2398	4.38131e-10	4.97731e-09	-1.55538	0.264679	-5.8765	4.19024e-09	4.43961e-08	3855.47	1311.79	1179.89
MMP9	2340.95	2.15158	0.506806	4.24537	2.18234e-05	9.67584e-05	3.035	0.490021	6.19361	5.88022e-10	7.35423e-09	719.208	8218.6	2267.36
VSX1	2.83511	-2.36472	0.616596	-3.83512	0.000125503	0.000461216	-1.9585	0.593141	-3.30192	0.000960262	0.00303987	10.6098	2.69825	2.04308
PYGB	9278.26	-1.93798	0.22704	-8.53589	1.39086e-17	5.12436e-16	-1.70737	0.21951	-7.77808	7.3635e-15	2.14838e-13	28764	8807.87	7506.63
GINS1	1265.8	1.91006	0.214924	8.88717	6.26849e-19	2.93728e-17	2.06392	0.207847	9.93001	3.08218e-23	4.93857e-21	324.222	1355.75	1218.56
SGK2	513.539	1.88423	0.560351	3.3626	0.000772129	0.00232542	1.60324	0.541814	2.95902	0.00308616	0.00846475	159.316	484.343	588.514
MYBL2	4929.47	2.35277	0.306466	7.67711	1.62719e-14	3.87513e-13	2.47284	0.296318	8.34522	7.10827e-17	2.99467e-15	947.692	5260.56	4840.47
HNF4A	46.6039	2.13351	0.638603	3.34091	0.000835053	0.00248861	3.30103	0.618233	5.33946	9.32249e-08	7.45952e-07	10.6701	156.76	30.2047
NFATC2	673.529	-1.76276	0.295986	-5.95555	2.59197e-09	2.57005e-08	-1.55045	0.286155	-5.41824	6.01902e-08	4.98137e-07	1895.2	647.185	558.499
PABPC1L	2280.31	2.66731	0.286583	9.30728	1.3115e-20	7.62944e-19	2.18266	0.277113	7.87643	3.3688e-15	1.03706e-13	461.642	2096.66	2933.68
SALL4	248.28	3.16943	0.383602	8.26229	1.42907e-16	4.65376e-15	3.14153	0.371249	8.46205	2.62728e-17	1.20527e-15	28.835	256.151	261.145
MRGBP	1538.22	1.02507	0.138661	7.39261	1.4397e-13	2.93724e-12	1.03929	0.134089	7.75077	9.13363e-15	2.6218e-13	768.481	1580.12	1564.52
SLC17A9	460.065	1.14189	0.373647	3.05606	0.00224268	0.00594776	1.36741	0.361294	3.78475	0.000153864	0.000602754	192.902	497.768	425.635
BIRC7	23.8226	1.63619	0.502965	3.2531	0.00114155	0.00328682	1.53625	0.487093	3.15392	0.00161092	0.0047894	8.29291	24.1052	45.7542
NKAIN4	28.5916	1.76426	0.512862	3.44002	0.00058167	0.00180953	2.78972	0.4969	5.61424	1.97423e-08	1.82989e-07	5.18506	35.2746	28.6982
EEF1A2	2943.17	2.67121	0.61042	4.37602	1.20865e-05	5.6933e-05	2.18653	0.590194	3.70476	0.000211587	0.000801417	589.432	2683.48	3754.9
SPEF1	22.8888	1.67382	0.398438	4.20095	2.65801e-05	0.000115264	2.23215	0.386486	5.77549	7.67285e-09	7.67992e-08	5.66844	26.5581	17.9792
CDC25B	4527.58	1.08773	0.292509	3.71863	0.000200306	0.000698801	1.14475	0.282816	4.04769	5.17266e-05	0.000227583	2130.67	4710.87	4528.35
SEL1L2	2.55858	-2.78358	0.561396	-4.95831	7.11074e-07	4.45221e-06	-2.1797	0.537857	-4.05257	5.06589e-05	0.000223489	11.1155	2.44817	1.59485
TRIB3	1711.25	1.44068	0.288569	4.99249	5.96058e-07	3.78749e-06	1.80224	0.279019	6.4592	1.05257e-10	1.53093e-09	545.893	1904.14	1482
RASSF2	1486.96	-1.16841	0.326463	-3.57898	0.000344933	0.00113687	-1.23856	0.315636	-3.92401	8.70882e-05	0.000363372	3249.48	1376.99	1445.6
RSPO4	183.921	2.50707	0.61828	4.05491	5.0153e-05	0.00020442	2.84272	0.59799	4.75379	1.99635e-06	1.20745e-05	28.4235	204.251	161.841
MYLK2	27.7188	1.92678	0.310089	6.21363	5.17754e-10	5.78739e-09	1.58214	0.301169	5.25332	1.49382e-07	1.14514e-06	8.89962	26.3602	33.4722
FERMT1	3518.47	1.21168	0.279763	4.3311	1.48364e-05	6.83778e-05	1.22176	0.270494	4.51678	6.27857e-06	3.39794e-05	1546.68	3608.1	3582.95
CCM2L	111.222	-1.17121	0.255127	-4.5907	4.41755e-06	2.30892e-05	-1.16144	0.246604	-4.70973	2.48047e-06	1.47068e-05	236.797	105.947	105.27
PLCB4	382.942	-3.06176	0.413551	-7.4036	1.32543e-13	2.7278e-12	-3.07396	0.399813	-7.68848	1.48895e-14	4.12267e-13	2427.82	288.255	290.673
MYL9	24535.6	-4.78603	0.398937	-11.997	3.68622e-33	1.41355e-30	-3.59984	0.385709	-9.33305	1.02865e-20	9.52987e-19	225809	18624.4	8184.69
MROH8	48.1003	-1.28099	0.234756	-5.45668	4.85126e-08	3.82362e-07	-1.26758	0.226794	-5.58912	2.28219e-08	2.08274e-07	109.779	45.4597	45.0345
SNTA1	1191.79	-1.36222	0.240292	-5.66903	1.43612e-08	1.24353e-07	-1.24283	0.232317	-5.34971	8.80958e-08	7.08099e-07	2730.22	1153.5	1061.89
E2F1	1685.91	1.77346	0.274225	6.46717	9.98581e-11	1.27037e-09	1.81611	0.265158	6.84919	7.42709e-12	1.32589e-10	500.382	1761.32	1710
CST4	45.4418	7.42767	0.840646	8.83567	9.95025e-19	4.50518e-17	6.3827	0.821252	7.77192	7.73059e-15	2.23442e-13	0.292966	61.4957	179.972
PPP1R16B	345.023	-1.32046	0.336209	-3.92751	8.58299e-05	0.000330751	-1.36699	0.325046	-4.20554	2.60465e-05	0.000123432	826.119	320.305	330.796
CELF4	23.62	1.198	0.433558	2.76317	0.00572421	0.0135123	1.51404	0.419809	3.60651	0.000310347	0.00112554	9.07715	41.8022	50.9034
ZNF516	821.849	-1.32366	0.254565	-5.19972	1.99591e-07	1.39365e-06	-1.30354	0.246115	-5.29647	1.18065e-07	9.25027e-07	1916.98	776.548	765.782
MYOM1	300.434	-5.10865	0.375044	-13.6215	2.98473e-42	7.01038e-39	-4.41005	0.362477	-12.1664	4.69225e-34	5.09578e-31	3589.94	168.905	104.03
SMAD7	1153.2	-1.25049	0.220153	-5.6801	1.34615e-08	1.17102e-07	-1.08194	0.212844	-5.08327	3.70989e-07	2.61055e-06	2394.56	1131.35	1006.43
LIPG	1418.6	2.30219	0.422506	5.4489	5.06832e-08	3.98467e-07	2.72768	0.408532	6.67678	2.44256e-11	3.99223e-10	242.381	1605.94	1195.79
LAMA1	402.58	1.78917	0.535924	3.33847	0.000842423	0.00250898	1.76424	0.518209	3.40449	0.000662871	0.00218734	119.733	406.874	413.964
H2BFM	7.12866	3.31454	0.867696	3.81993	0.000133488	0.000486374	3.03184	0.84431	3.59091	0.000329531	0.00118697	0.824726	6.9601	8.4629
VSIG1	194.346	-2.66416	0.523484	-5.08929	3.59399e-07	2.38626e-06	-2.27496	0.506072	-4.49534	6.94581e-06	3.72093e-05	858.095	177.318	135.411
TBL1X	1741.16	-1.33275	0.221295	-6.02251	1.71728e-09	1.771e-08	-1.38396	0.213953	-6.46851	9.89741e-11	1.44384e-09	4189.11	1604.93	1662.92
CHRDL1	385.491	-3.64216	0.698423	-5.21482	1.83992e-07	1.29532e-06	-3.00451	0.675234	-4.44958	8.60388e-06	4.51513e-05	2583.15	321.942	206.86
SRPX	914.137	-3.20007	0.432481	-7.39932	1.36879e-13	2.80782e-12	-2.17558	0.418115	-5.2033	1.95784e-07	1.46635e-06	4150.82	918.872	451.674
CACNA1F	36.7889	1.081	0.370341	2.91894	0.00351226	0.00878066	1.06484	0.358472	2.97048	0.00297336	0.00819098	17.833	37.5938	38.0066
BMX	49.7017	-2.0618	0.360978	-5.71172	1.11841e-08	9.89403e-08	-2.18305	0.348872	-6.25745	3.91326e-10	5.09636e-09	190.193	125.843	85.098
ZC3H12B	87.9765	-1.18011	0.315292	-3.74291	0.000181901	0.000642586	-1.40049	0.304803	-4.59475	4.33275e-06	2.43591e-05	207.502	78.5568	91.4553
SLC35A2	2802.63	1.1081	0.157497	7.0357	1.98258e-12	3.32317e-11	1.21161	0.152289	7.95603	1.77646e-15	5.82656e-14	1265.51	2932.09	2729
RS1	8.40855	1.69447	0.472029	3.58977	0.000330973	0.00109837	1.13437	0.45879	2.47253	0.0134161	0.0305413	3.35587	9.35896	20.1006
PCSK1N	204.498	3.52069	0.586616	6.00169	1.95276e-09	1.99198e-08	3.39144	0.567528	5.97581	2.28951e-09	2.54292e-08	19.7315	207.668	227.181
GATA1	5.50191	-2.19549	0.368309	-5.96101	2.50684e-09	2.49804e-08	-1.7596	0.353515	-4.97744	6.44296e-07	4.3251e-06	18.05	5.35716	4.01576
CD99L2	1668.56	-1.28239	0.231291	-5.54449	2.94805e-08	2.41683e-07	-1.23242	0.223617	-5.51133	3.56138e-08	3.11153e-07	3744.47	1593.53	1539.2
VGLL1	3258.42	1.80902	0.480695	3.76334	0.000167661	0.00059788	1.83709	0.464765	3.95272	7.72681e-05	0.000327218	944.927	3376.62	3311.55
CD40LG	25.4882	-1.82002	0.44338	-4.10487	4.04537e-05	0.000168393	-1.51576	0.428321	-3.53884	0.000401892	0.00141121	71.3467	24.9871	20.227
KLHL4	44.4094	-1.92135	0.530743	-3.62012	0.000294468	0.000988221	-1.33898	0.512909	-2.61056	0.00903939	0.0217962	117.007	46.2329	30.8229
ITIH6	19.5341	2.52558	0.491549	5.138	2.77675e-07	1.88631e-06	2.633	0.477508	5.51404	3.50683e-08	3.06718e-07	3.35859	20.6343	19.1706
ZDHHC15	54.2687	-2.25713	0.462012	-4.88543	1.03202e-06	6.24527e-06	-1.46947	0.446401	-3.29181	0.000995462	0.00313758	159.295	57.48	33.2547
CENPI	344.23	1.81692	0.230594	7.8793	3.29228e-15	8.73525e-14	1.88308	0.223098	8.4406	3.1571e-17	1.422e-15	98.1215	361.018	344.82
HTR2A	17.8051	-3.33217	0.504005	-6.61137	3.80773e-11	5.23771e-10	-1.81197	0.485577	-3.73158	0.000190282	0.000728019	68.9468	19.68	6.81795
FGF9	39.6741	-3.6678	0.618026	-5.9347	2.94385e-09	2.88706e-08	-2.56781	0.597026	-4.301	1.70027e-05	8.38258e-05	224.153	37.7861	17.5922
SGCG	20.1707	-4.31446	0.626071	-6.89133	5.52722e-12	8.61164e-11	-3.7619	0.604503	-6.22312	4.8736e-10	6.21861e-09	187.84	13.8704	9.42015
RGCC	837.73	-1.56348	0.264339	-5.91466	3.32565e-09	3.23275e-08	-1.35751	0.25556	-5.31189	1.08492e-07	8.55164e-07	2093.81	817.359	708.516
KATNAL1	464.007	-2.28097	0.315379	-7.23249	4.74218e-13	8.89278e-12	-1.58484	0.304876	-5.19831	2.0111e-07	1.50222e-06	1438.33	479.308	295.808
MEDAG	519.558	-3.49415	0.449528	-7.77292	7.66945e-15	1.92402e-13	-1.97198	0.434556	-4.53791	5.68136e-06	3.10916e-05	2204.45	562.099	195.669
TSC22D1	9291.55	-1.79854	0.209529	-8.58372	9.18505e-18	3.50075e-16	-1.60689	0.20258	-7.9321	2.15475e-15	6.92782e-14	26853.8	8816.37	7719.52
MSLN	1010.28	4.34101	0.683426	6.35184	2.12756e-10	2.56097e-09	4.72628	0.660911	7.15117	8.60433e-13	1.76678e-11	96.266	1145.47	1031.71
CBLN1	18.2956	-2.17128	0.646657	-3.3577	0.000785938	0.00236322	-2.31644	0.625007	-3.70625	0.000210347	0.000797492	75.6288	15.1831	16.7601
SLC38A7	1486.36	1.11308	0.131368	8.47299	2.39168e-17	8.55995e-16	1.23411	0.127042	9.71416	2.62398e-22	3.58696e-20	667.348	1569.48	1443.17
WFDC1	721	-2.61693	0.344904	-7.58741	3.2636e-14	7.41511e-13	-2.56888	0.333453	-7.70388	1.31998e-14	3.69671e-13	3547.63	597.949	578.362
SEC14L5	24.5453	-1.1808	0.392884	-3.00545	0.00265187	0.00688525	-1.01056	0.379602	-2.66214	0.00776445	0.0190822	49.1606	24.4013	32.1017
CRISPLD2	3470.37	-2.90851	0.334751	-8.68857	3.67025e-18	1.49273e-16	-1.90189	0.323643	-5.87651	4.19007e-09	4.43961e-08	13467.3	3603.83	1793.65
FOXF1	791.297	-3.60315	0.350044	-10.2934	7.54393e-25	8.64332e-23	-2.93937	0.338405	-8.68596	3.7556e-18	2.02802e-16	5146.96	670.984	423.587
FBXO31	1490.65	-1.16309	0.132321	-8.78988	1.49719e-18	6.48208e-17	-1.02401	0.127922	-8.00494	1.19526e-15	4.0494e-14	2984.14	1467.18	1332.2
RHBDL1	109.189	1.27425	0.31798	4.00732	6.14119e-05	0.000245204	1.12963	0.307636	3.67197	0.000240689	0.000899786	49.4019	108.215	119.66
CRYM	218.359	-2.72617	0.520625	-5.23634	1.63793e-07	1.1649e-06	-2.29278	0.503311	-4.55539	5.2288e-06	2.88736e-05	981.443	200.353	148.294
PRSS33	6.42406	1.95298	0.780764	2.50137	0.0123713	0.0265181	1.83357	0.757381	2.42094	0.0154804	0.0346276	1.78766	55.4959	26.5095
SALL1	65.3497	-2.03212	0.456335	-4.45314	8.46242e-06	4.13655e-05	-1.75074	0.441063	-3.96938	7.20606e-05	0.0003079	209.661	62.2929	51.2731
TOX3	1244.61	2.44302	0.72275	3.38017	0.000724409	0.00220004	1.689	0.698805	2.41698	0.0156498	0.0349506	325.33	1049.13	1769.35
KNOP1	1099.47	1.08454	0.139303	7.78542	6.94814e-15	1.75951e-13	1.14281	0.134722	8.48273	2.19969e-17	1.0287e-15	517.018	1141.89	1096.57
CORO2B	128.964	-1.75893	0.382581	-4.59755	4.2749e-06	2.2431e-05	-1.16411	0.369786	-3.14807	0.0016435	0.0048744	304.186	135.747	89.8566
HERC1	2068.94	-1.09257	0.126546	-8.63378	5.93595e-18	2.32368e-16	-1.10466	0.122344	-9.02911	1.73072e-19	1.19127e-17	4218.38	1961.16	1977.56
RASL12	572.331	-3.7277	0.349201	-10.6749	1.33346e-26	2.00446e-24	-2.88614	0.33757	-8.54973	1.23374e-17	6.0293e-16	3698.17	500.265	279.129
ACSBG1	189.804	1.75152	0.551067	3.17841	0.00148085	0.00412969	1.56837	0.532898	2.9431	0.00324944	0.00886038	63.1	187.287	212.721
IGDCC4	200.746	-2.09008	0.326285	-6.40568	1.49704e-10	1.8555e-09	-1.41863	0.31537	-4.49831	6.8497e-06	3.67548e-05	561.244	209.998	131.755
CEMIP	966.631	1.19667	0.400848	2.98535	0.00283252	0.0072906	1.69096	0.387576	4.36293	1.28333e-05	6.489e-05	340.78	1295.67	781.295
ZNF106	2287.61	-1.63905	0.160064	-10.24	1.31269e-24	1.45949e-22	-1.57352	0.154749	-10.1682	2.74951e-24	5.54096e-22	6335.41	2128.05	2033.49
CEP152	355.656	1.08861	0.173181	6.286	3.25755e-10	3.78303e-09	1.03555	0.167532	6.18125	6.35958e-10	7.90821e-09	175.524	359.362	372.774
ATP8B4	137.56	-1.71077	0.305564	-5.59875	2.15905e-08	1.82004e-07	-1.30694	0.295329	-4.42538	9.62739e-06	4.98533e-05	344.848	139.321	105.315
TGM5	73.31	-2.57557	0.567197	-4.54087	5.6023e-06	2.86286e-05	-2.40641	0.548285	-4.38897	1.13889e-05	5.80675e-05	336.438	63.496	97.3602
OIP5	207.986	1.89343	0.237651	7.96728	1.6221e-15	4.5021e-14	1.96646	0.230028	8.54878	1.24398e-17	6.06417e-16	56.0897	218.672	207.851
CA2	1208.25	1.95429	0.459372	4.25427	2.09731e-05	9.34292e-05	1.83306	0.444164	4.12699	3.67541e-05	0.000167749	341.03	1408.57	1933.4
EYA1	78.8244	-2.65342	0.527025	-5.03472	4.78535e-07	3.10165e-06	-1.68666	0.509329	-3.31154	0.000927842	0.00294678	269.238	83.5701	42.716
TRPA1	460.653	-2.84704	0.525764	-5.41505	6.12702e-08	4.73383e-07	-2.13673	0.5083	-4.20369	2.62598e-05	0.000124262	1971.39	448.273	274.057
CPQ	1272.07	-1.61179	0.276356	-5.83228	5.46753e-09	5.11883e-08	-1.55499	0.267186	-5.81987	5.8892e-09	6.01474e-08	3487.82	1187.03	1141.13
CALB1	380.541	4.76444	0.736244	6.47128	9.7176e-11	1.24129e-09	4.5494	0.7122	6.38781	1.68274e-10	2.33956e-09	49.3735	1024.87	1377.52
SFRP1	911.775	-3.67709	0.563985	-6.51984	7.0382e-11	9.26754e-10	-2.54515	0.545262	-4.66776	3.04502e-06	1.76839e-05	5104.74	874.596	399.045
TRPS1	590.392	-2.16337	0.391498	-5.52587	3.27853e-08	2.66913e-07	-1.33985	0.378486	-3.54004	0.000400066	0.00140675	1607.78	635.116	358.817
NCALD	517.829	-2.83922	0.299226	-9.48854	2.34291e-21	1.52329e-19	-2.10672	0.289254	-7.28331	3.25731e-13	7.14634e-12	2185.84	507.561	305.372
TSTA3	5796.68	1.07024	0.172949	6.1882	6.08569e-10	6.7503e-09	1.04376	0.16722	6.24183	4.32476e-10	5.59871e-09	2861.36	5899.01	6008.39
PYCR3	1251.97	1.20528	0.189281	6.36769	1.91898e-10	2.3293e-09	1.20929	0.183033	6.60697	3.92257e-11	6.19374e-10	555.815	1285.57	1281.93
SQLE	4128.41	1.29567	0.240688	5.38319	7.31774e-08	5.5781e-07	1.51804	0.232716	6.52314	6.88497e-11	1.02974e-09	1546.22	4428.47	3795.9
ARHGEF10	728.652	-1.20252	0.22562	-5.32987	9.82855e-08	7.30821e-07	-1.03594	0.218124	-4.7493	2.04117e-06	1.23113e-05	1480.21	721.678	642.965
MCM4	7366.64	1.44303	0.192822	7.48375	7.22336e-14	1.54763e-12	1.50031	0.186435	8.04738	8.45885e-16	2.97934e-14	2714.47	7679.7	7380.78
ADAM2	12.7357	4.60126	1.02847	4.47389	7.68092e-06	3.7919e-05	5.4365	1.00085	5.43187	5.57674e-08	4.64879e-07	12.6981	33.3839	45.2763
FGL1	11.5373	6.11106	1.00508	6.08015	1.20067e-09	1.27245e-08	5.14272	0.979096	5.25252	1.50032e-07	1.14878e-06	0.124005	9.2507	18.0685
TULP2	10.1487	-1.6087	0.410196	-3.92177	8.78997e-05	0.000337275	-1.45301	0.395857	-3.67054	0.000242035	0.000903954	26.6472	9.70127	8.79611
DHDH	92.3328	1.06731	0.379696	2.81096	0.00493943	0.0118625	1.61378	0.367265	4.39404	1.11263e-05	5.68917e-05	34.7084	106.365	72.7699
LHB	21.2657	2.13756	0.410086	5.21246	1.8635e-07	1.31094e-06	1.99266	0.398161	5.00467	5.59582e-07	3.81406e-06	5.33438	21.3059	23.6185
KCNA7	10.0476	2.63137	0.484853	5.42715	5.72603e-08	4.45332e-07	2.48291	0.473101	5.24816	1.53625e-07	1.17399e-06	1.72945	10.1035	11.1823
CKM	50.0016	-2.44239	0.445856	-5.47796	4.30248e-08	3.41834e-07	-1.96808	0.430812	-4.56829	4.91714e-06	2.73069e-05	188.248	48.113	34.5917
SLC17A7	49.4522	-1.6791	0.403434	-4.16202	3.15447e-05	0.000134161	-1.29877	0.389848	-3.33148	0.000863864	0.00277106	123.003	49.8943	77.3063
RNASEH2A	2131.76	1.4452	0.180129	8.02317	1.03052e-15	2.95627e-14	1.46615	0.174178	8.41754	3.84474e-17	1.69655e-15	798.03	2205.1	2173.25
KLC3	512.149	1.97647	0.41663	4.74394	2.09604e-06	1.18593e-05	2.10164	0.402882	5.21651	1.82323e-07	1.37555e-06	127.335	546.571	501.184
AMH	179.659	2.82412	0.485829	5.81298	6.13695e-09	5.70011e-08	2.9149	0.470039	6.2014	5.59633e-10	7.02615e-09	25.4207	191.428	179.761
DMPK	2814.72	-2.14088	0.201965	-10.6003	2.97131e-26	4.2619e-24	-2.11294	0.195263	-10.821	2.73831e-27	8.63362e-25	10665.5	2465.5	2418.13
IL4I1	528.655	1.39274	0.415391	3.35283	0.000799905	0.00239755	1.01158	0.401654	2.51852	0.0117848	0.0273078	245.737	495.496	645.297
TLE6	319.154	2.14916	0.445377	4.82549	1.3966e-06	8.19299e-06	2.17125	0.430722	5.04095	4.63225e-07	3.1963e-06	73.6855	331.922	326.876
ASF1B	1800.74	2.08343	0.221152	9.42083	4.47554e-21	2.79387e-19	2.07903	0.213857	9.72163	2.43836e-22	3.3947e-20	440.968	1862.75	1868.41
TNNT1	565.032	4.05607	0.544525	7.44883	9.41737e-14	1.97491e-12	4.44175	0.526733	8.43264	3.37944e-17	1.50825e-15	29.5327	641.568	491.049
OLFM2	622.013	1.48556	0.387466	3.83405	0.000126051	0.000463049	1.67336	0.374656	4.46639	7.95515e-06	4.20449e-05	209.928	669.804	588.064
CASP14	3951.58	4.58304	0.763864	5.99982	1.97541e-09	2.01181e-08	5.78687	0.738599	7.83493	4.69097e-15	1.40643e-13	269.428	7215.78	4583.4
SLC1A6	1809.14	5.89556	0.799744	7.37181	1.68327e-13	3.38999e-12	6.61096	0.773477	8.54706	1.26258e-17	6.13955e-16	22.0476	2160.84	1316.04
CCNE1	1312.91	2.11982	0.284234	7.45801	8.78398e-14	1.85242e-12	2.28065	0.274853	8.29769	1.06153e-16	4.29623e-15	290.067	1409.62	1260.88
CNTD2	55.1777	2.24319	0.456813	4.91051	9.08388e-07	5.55981e-06	2.84656	0.442486	6.43309	1.25034e-10	1.79425e-09	8.93321	64.7313	42.617
PRX	274.861	-1.41084	0.225118	-6.26711	3.67807e-10	4.23752e-09	-1.27323	0.217611	-5.85094	4.88799e-09	5.08517e-08	643.367	266.102	241.867
FSD1	241.815	2.43943	0.52015	4.68986	2.73391e-06	1.50363e-05	2.93165	0.503093	5.82725	5.63481e-09	5.78515e-08	36.4652	278.364	197.88
CLIP3	1052.29	-3.54686	0.362005	-9.79781	1.1505e-22	9.44011e-21	-2.70651	0.349976	-7.73342	1.04698e-14	2.98344e-13	6214.2	951.964	531.604
BBC3	841.782	1.14095	0.216983	5.25828	1.45409e-07	1.04284e-06	1.11971	0.209822	5.33649	9.47617e-08	7.567e-07	394.235	857.218	869.875
ICAM5	100.427	1.61685	0.430765	3.75345	0.000174418	0.000618946	1.97307	0.416724	4.73471	2.19365e-06	1.31417e-05	28.5131	112.161	87.6001
ATP1A3	126.745	1.78493	0.459811	3.88189	0.000103649	0.000389746	1.75638	0.444758	3.94906	7.84602e-05	0.000331763	38.6424	146.8	161.355
CNFN	504.399	-2.11187	0.432349	-4.88465	1.03612e-06	6.2661e-06	-1.97443	0.417998	-4.72354	2.31774e-06	1.38385e-05	6691.69	624.967	1017.84
GRIN2D	1207.62	3.44974	0.437196	7.89061	3.00719e-15	8.02629e-14	3.72958	0.422794	8.82128	1.13154e-18	6.66247e-17	100.705	1336.86	1101.15
SYNGR4	9.13621	2.30795	0.439411	5.25236	1.50162e-07	1.07364e-06	2.5823	0.429414	6.01354	1.81516e-09	2.06656e-08	1.72331	17.7067	22.1409
CCDC114	62.5321	1.84531	0.386401	4.77562	1.79157e-06	1.02633e-05	2.08835	0.374113	5.58214	2.37584e-08	2.15812e-07	16.0502	68.3689	57.7518
LIG1	3072.55	1.33949	0.150658	8.89094	6.05914e-19	2.84628e-17	1.34112	0.145679	9.20596	3.38622e-20	2.81147e-18	1246.06	3158.11	3154.55
PLA2G4C	237.834	-1.46241	0.337825	-4.32891	1.49848e-05	6.89658e-05	-1.04057	0.326574	-3.18632	0.00144098	0.00433958	507.239	246.558	184.021
HAS1	159.201	-4.93473	0.614495	-8.03054	9.70414e-16	2.79236e-14	-2.67464	0.59379	-4.50435	6.65769e-06	3.58525e-05	1024.01	160.425	33.5056
THEG	12.6354	2.49037	0.803775	3.09834	0.0019461	0.0052509	1.90547	0.778874	2.44644	0.0144275	0.032533	2.94321	15.6698	16.6233
LILRB5	232.111	-1.86106	0.432657	-4.30146	1.69678e-05	7.71787e-05	-1.09122	0.418248	-2.60902	0.00908025	0.0218732	538.584	252.777	148.241
MAST1	151.83	2.20999	0.378	5.84654	5.01898e-09	4.73427e-08	2.2534	0.365757	6.16092	7.23227e-10	8.86372e-09	33.27	159.128	154.389
SLC5A5	56.4442	1.55646	0.572579	2.71833	0.00656125	0.015238	3.65729	0.554188	6.59937	4.12907e-11	6.47793e-10	6.16288	115.176	28.2735
ISYNA1	5702.38	1.27736	0.323693	3.94621	7.93968e-05	0.0003083	1.33083	0.312965	4.25234	2.11546e-05	0.000102258	2349.47	5910.58	5695.5
ATP4A	13.3242	3.58526	0.783333	4.57692	4.71863e-06	2.45129e-05	3.63409	0.76192	4.76965	1.84548e-06	1.12384e-05	1.1165	17.2575	15.9832
LSR	14852.5	1.07415	0.236548	4.54095	5.60023e-06	2.86286e-05	1.10449	0.228707	4.82927	1.37035e-06	8.61616e-06	7118.05	15306.2	14987.8
HPN	68.1366	1.66204	0.577745	2.87678	0.0040176	0.00989653	2.08757	0.558874	3.73532	0.000187477	0.000719437	18.1517	77.0675	73.0321
SCN1B	228.492	-1.86017	0.347218	-5.35736	8.44466e-08	6.36483e-07	-1.27606	0.335636	-3.80191	0.000143586	0.000567147	578.692	238.988	159.38
GRIK5	113.985	-2.71443	0.419312	-6.47353	9.57392e-11	1.22544e-09	-1.82079	0.405224	-4.49329	7.01317e-06	3.75085e-05	414.737	117.323	63.1257
ZNF85	318.908	1.20282	0.245918	4.89112	1.00264e-06	6.08318e-06	1.04851	0.237847	4.40834	1.04165e-05	5.36269e-05	151.775	314.421	349.9
RUNDC3B	51.0636	-2.17676	0.286984	-7.58494	3.32645e-14	7.53968e-13	-1.9423	0.27718	-7.00737	2.42839e-12	4.71403e-11	180.962	47.0649	40.0704
RASA4	34.0546	-1.00026	0.315779	-3.1676	0.00153704	0.00425848	-1.29984	0.305265	-4.25806	2.06208e-05	0.000100024	73.0643	29.7373	36.5299
NAMPT	7511.32	-1.67082	0.269106	-6.20877	5.34018e-10	5.95517e-09	-1.43337	0.260182	-5.5091	3.60675e-08	3.14333e-07	19777.1	7322.71	6211.45
DNAH11	68.2005	1.40587	0.601935	2.33558	0.019513	0.0393654	2.10662	0.582197	3.61839	0.000296445	0.00108154	18.7673	80.8286	49.6931
DLX5	407.458	1.82273	0.453137	4.02247	5.75906e-05	0.000231719	1.29866	0.438173	2.96382	0.00303847	0.00835386	148.113	364.771	524.477
STEAP1B	74.5844	2.1017	0.582033	3.61097	0.000305051	0.00102028	1.80879	0.563055	3.21245	0.00131607	0.00400102	20.6327	93.3133	88.435
ATP6V0A4	126.978	1.71471	0.586303	2.92461	0.0034489	0.00863948	2.82118	0.567078	4.97494	6.52669e-07	4.3753e-06	41.402	225.518	162.479
CAV1	9051.68	-1.83108	0.40702	-4.49874	6.83562e-06	3.42693e-05	-1.34711	0.393524	-3.4232	0.00061888	0.00206061	23570.7	9265.1	6624.63
VIPR2	31.291	-3.76593	0.474831	-7.9311	2.17219e-15	5.91528e-14	-3.34741	0.458561	-7.29982	2.88148e-13	6.40082e-12	239.863	23.5658	17.6385
CPED1	466.085	-4.74924	0.377785	-12.5713	3.03792e-36	2.03866e-33	-3.78179	0.365172	-10.3562	3.92262e-25	9.70626e-23	4539.02	329.989	168.718
GHRHR	4.32606	3.06833	1.01859	3.01234	0.00259244	0.00675616	2.6981	0.990391	2.72427	0.00644432	0.0161816	0.622789	14.0623	10.7279
CASP2	2704.37	1.16557	0.120606	9.66429	4.27575e-22	3.13833e-20	1.1812	0.116626	10.1281	4.14528e-24	7.82044e-22	1223.15	2774.44	2744.58
TFR2	254.376	2.61132	0.354546	7.36527	1.76792e-13	3.54528e-12	2.3911	0.343025	6.97061	3.15559e-12	5.98888e-11	47.7586	251.243	292.688
MYL10	1.58649	-1.85768	0.533789	-3.48017	0.000501093	0.00158351	-1.86814	0.512857	-3.64262	0.000269877	0.000994261	5.06791	1.4248	1.43135
EZH2	1474.14	1.70571	0.223603	7.62831	2.37846e-14	5.50386e-13	1.73447	0.216222	8.0217	1.04295e-15	3.60206e-14	459.841	1529.7	1499.5
MEST	3440.78	2.06541	0.399951	5.16416	2.41522e-07	1.66052e-06	2.67551	0.386704	6.91875	4.55652e-12	8.42676e-11	629.198	4020.23	2633.82
MEOX2	80.7724	-2.07973	0.56925	-3.65345	0.000258741	0.000878206	-2.03864	0.550307	-3.70456	0.000211761	0.000801918	294.917	71.8057	69.7567
PRKAG2	990.416	-1.80439	0.18536	-9.7345	2.1488e-22	1.66157e-20	-1.65064	0.179196	-9.21134	3.22071e-20	2.70838e-18	2929.87	932.947	838.571
LHX2	41.5322	1.40516	0.617651	2.275	0.0229056	0.0452383	2.65817	0.597588	4.44816	8.66086e-06	4.53894e-05	8.52752	53.2915	31.5284
TMEM245	3206.23	-1.12161	0.149274	-7.51375	5.74565e-14	1.24955e-12	-1.03546	0.144321	-7.17475	7.2439e-13	1.51286e-11	6329.63	3087.57	2908.55
PRUNE2	1213.24	-5.19243	0.535459	-9.69716	3.10001e-22	2.33932e-20	-4.28973	0.517679	-8.28645	1.16675e-16	4.64514e-15	14146.9	723.286	386.854
OGN	359.391	-6.05656	0.644641	-9.39524	5.70849e-21	3.50531e-19	-4.16359	0.623105	-6.68201	2.35694e-11	3.86846e-10	4230.23	236.113	63.527
ECM2	249.975	-2.19748	0.324795	-6.76574	1.3263e-11	1.95307e-10	-1.30476	0.313929	-4.15623	3.23536e-05	0.000149869	672.338	272.129	146.56
TLE4	992.94	-1.06447	0.246311	-4.32166	1.54862e-05	7.10413e-05	-1.17778	0.238139	-4.94578	7.58401e-07	5.03233e-06	2080.31	919.489	994.626
AMBP	26.8488	3.57038	0.718802	4.96712	6.79539e-07	4.27041e-06	2.28897	0.696633	3.28575	0.0010171	0.00319394	3.87118	50.8351	56.9128
TNFSF8	59.2585	-1.61526	0.401907	-4.01899	5.84472e-05	0.000234763	-1.08735	0.38838	-2.7997	0.00511495	0.0132223	132.275	62.2547	43.169
CDC37L1	905.325	-1.14807	0.147272	-7.79554	6.41331e-15	1.62846e-13	-1.00651	0.142372	-7.06957	1.55416e-12	3.10641e-11	1792.85	892.192	808.735
RLN2	28.4418	2.12655	0.458202	4.64108	3.46593e-06	1.86071e-05	2.25469	0.444208	5.07576	3.85946e-07	2.70508e-06	6.31837	30.427	27.8161
RLN1	11.5122	1.73706	0.457742	3.79485	0.000147734	0.000533215	1.69071	0.444541	3.80328	0.000142794	0.000564478	3.60569	15.3809	15.2236
KANK1	3062.44	-1.71431	0.248927	-6.88679	5.70673e-12	8.88396e-11	-1.79441	0.240671	-7.45588	8.92669e-14	2.15964e-12	9416.83	2714.63	2869.56
ELAVL2	108.2	2.724	0.607609	4.48315	7.35489e-06	3.65411e-05	2.87159	0.587862	4.8848	1.03534e-06	6.69714e-06	15.8978	116.492	105.138
NCS1	2675.04	-2.35165	0.245631	-9.57391	1.02938e-21	7.21719e-20	-2.08151	0.23748	-8.765	1.86771e-18	1.04914e-16	10387.4	2454.05	2035.01
CA9	1559.09	3.90997	0.560595	6.97469	3.06551e-12	4.98709e-11	3.34932	0.542065	6.17882	6.45825e-10	8.01052e-09	137.478	1400.98	2066.39
MPDZ	835.065	-1.88995	0.236591	-7.98826	1.36851e-15	3.8437e-14	-1.80835	0.228731	-7.90604	2.65706e-15	8.35053e-14	2677.4	764.26	722.117
PTGDS	2190.9	-2.96234	0.488934	-6.05878	1.37155e-09	1.43975e-08	-2.09368	0.472715	-4.42905	9.46498e-06	4.91034e-05	9339.05	2188.03	1198.27
ATRNL1	44.4438	-1.23806	0.513002	-2.41336	0.0158061	0.0328209	-1.42459	0.495941	-2.8725	0.00407234	0.0108	107.21	39.861	45.3892
RAB11FIP2	784.432	-1.01496	0.202473	-5.01281	5.36399e-07	3.44579e-06	-1.01618	0.19575	-5.19121	2.08935e-07	1.55591e-06	1410.1	696.832	697.312
CXCL12	1830.56	-2.94046	0.435417	-6.75322	1.44602e-11	2.11776e-10	-1.87796	0.420968	-4.46106	8.15536e-06	4.30402e-05	7056.14	1919.77	919.179
PPP3CB	2196.51	-1.21875	0.127487	-9.55982	1.17966e-21	8.1492e-20	-1.18537	0.123253	-9.6174	6.75186e-22	8.30096e-20	4753.15	2089.66	2041.77
CCSER2	1807.91	-1.43587	0.141807	-10.1255	4.25658e-24	4.41884e-22	-1.27209	0.137094	-9.27896	1.71135e-20	1.49294e-18	4237.01	1753.73	1565.65
BMPR1A	1255.19	-1.1045	0.127627	-8.65414	4.96646e-18	1.97711e-16	-1.05611	0.123384	-8.55953	1.13331e-17	5.55239e-16	2509.01	1205.9	1166.2
ACTA2	21084.9	-4.23834	0.396637	-10.6857	1.18748e-26	1.81405e-24	-3.05796	0.383485	-7.97414	1.5344e-15	5.07519e-14	152847	18353.5	8098.19
TLX1	46.6025	5.93236	0.89315	6.64206	3.09324e-11	4.30534e-10	6.63634	0.870708	7.62177	2.50228e-14	6.64601e-13	11.7033	73.5809	65.2611
CPEB3	219.736	-1.33805	0.179765	-7.44333	9.81803e-14	2.05207e-12	-1.34755	0.173753	-7.75552	8.79807e-15	2.53291e-13	522.547	205.016	206.474
NEURL1	278.638	-2.64652	0.495023	-5.34627	8.97872e-08	6.72957e-07	-1.73705	0.478546	-3.62985	0.000283586	0.0010385	971.133	291.492	155.067
MAP3K8	1080.24	-1.32989	0.229772	-5.78785	7.12935e-09	6.54424e-08	-1.40905	0.222147	-6.34286	2.25544e-10	3.07029e-09	2621.48	987.29	1042.96
DKK1	2046.55	-1.84455	0.557141	-3.31075	0.000930468	0.00274682	-1.69711	0.538666	-3.15058	0.00162948	0.00484015	6225.43	1919.98	1733.43
EBF3	106.333	-1.87002	0.342564	-5.4589	4.79105e-08	3.77934e-07	-1.6776	0.331107	-5.06665	4.04872e-07	2.82659e-06	321.727	100.55	87.9315
SORCS1	44.0433	-4.53764	0.593642	-7.64373	2.11018e-14	4.94394e-13	-4.29093	0.573625	-7.48037	7.41134e-14	1.82006e-12	486.253	24.8344	20.9178
UBE2S	2564.29	1.40948	0.225409	6.25301	4.02626e-10	4.59341e-09	1.39667	0.217949	6.40825	1.47201e-10	2.06941e-09	1000.46	2634.17	2657.63
LGI1	6.51573	-2.42005	0.735757	-3.28919	0.00100475	0.00293566	-3.86819	0.71205	-5.43247	5.55778e-08	4.63496e-07	44.4738	3.0729	8.29726
RUNDC3A	149.74	1.77371	0.438016	4.0494	5.13483e-05	0.000208658	1.88076	0.423669	4.43921	9.02886e-06	4.71033e-05	43.0812	158.888	147.473
CSF3	550.993	-3.55167	0.728196	-4.87736	1.07516e-06	6.47302e-06	-3.43105	0.704039	-4.87338	1.09704e-06	7.05425e-06	4224.77	391.721	360.283
RGS9	71.9601	-2.09848	0.391196	-5.36426	8.12799e-08	6.14834e-07	-1.7618	0.378062	-4.66009	3.16076e-06	1.82854e-05	235.046	69.2968	54.8726
WNT3	235.43	2.18258	0.305703	7.13952	9.36567e-13	1.65551e-11	2.45221	0.295811	8.28978	1.13461e-16	4.55428e-15	46.9929	257.136	213.387
ASPA	90.7919	-3.22723	0.465624	-6.93098	4.17938e-12	6.63825e-11	-3.33911	0.450096	-7.41865	1.1832e-13	2.81035e-12	643.785	63.6327	68.7454
P2RX1	540.93	-5.54893	0.532809	-10.4145	2.12944e-25	2.72192e-23	-4.11951	0.515055	-7.9982	1.26251e-15	4.22595e-14	6145.01	353.559	131.248
KRT37	5.0824	2.44814	0.770254	3.17836	0.00148111	0.00412969	3.38775	0.750728	4.51262	6.4031e-06	3.45672e-05	0.557039	9.34084	9.02052
HOXB6	710.667	2.39684	0.413827	5.79189	6.95988e-09	6.40118e-08	1.43384	0.400159	3.58316	0.000339458	0.00121689	207.992	562.35	1096.24
RASD1	566.791	-2.05987	0.461006	-4.46821	7.8878e-06	3.88192e-05	-1.7264	0.445705	-3.87341	0.000107323	0.000437621	1812.48	547.823	434.841
CCL2	1613.83	-3.65881	0.408132	-8.96476	3.10969e-19	1.53362e-17	-3.11275	0.394588	-7.8886	3.05601e-15	9.46732e-14	11263.5	1302.14	891.766
KAT2A	4863.25	1.28461	0.165886	7.74394	9.63796e-15	2.37349e-13	1.12887	0.160394	7.03809	1.94891e-12	3.82119e-11	2196.37	4803.92	5351.51
HSD17B1	421.55	1.22191	0.317152	3.85275	0.000116797	0.000433202	1.90938	0.30669	6.22576	4.79219e-10	6.12674e-09	131.615	680.368	536.438
CNTNAP1	474.687	-1.62292	0.263154	-6.16718	6.9518e-10	7.65227e-09	-1.2676	0.254398	-4.98277	6.26818e-07	4.21501e-06	1152.96	478.853	374.207
DLX4	76.7758	1.58391	0.39493	4.01062	6.05605e-05	0.000242062	2.12052	0.382185	5.54839	2.88307e-08	2.56407e-07	20.1976	152.317	73.2153
SGCA	257.251	-4.45248	0.509716	-8.73521	2.432e-18	1.02003e-16	-3.35503	0.492701	-6.80947	9.79603e-12	1.70976e-10	2119.8	207.191	96.8263
PTGES3L-AARSD1	7.46361	-2.23231	0.386663	-5.77327	7.77499e-09	7.09529e-08	-1.95715	0.372295	-5.25697	1.46448e-07	1.12442e-06	27.2269	6.94998	5.69514
MPP2	304.992	-1.52211	0.325968	-4.66951	3.01924e-06	1.64297e-05	-1.26122	0.315126	-4.00229	6.2733e-05	0.000271908	722.77	301.398	251.527
DUSP3	3443.17	-1.65201	0.152023	-10.8668	1.65918e-27	2.80865e-25	-1.37624	0.146976	-9.36373	7.6969e-21	7.49451e-19	8796.25	3387.93	2798.44
HLF	173.64	-5.48553	0.44283	-12.3874	3.05684e-35	1.74055e-32	-4.44984	0.427879	-10.3997	2.48588e-25	6.56676e-23	2150.15	98.3666	47.9496
RCVRN	4.26658	-2.69093	0.431592	-6.2349	4.52075e-10	5.11716e-09	-1.93045	0.413035	-4.67382	2.95646e-06	1.72413e-05	16.2825	4.30676	2.51461
MYH3	330.274	-3.34321	0.412704	-8.10075	5.462e-16	1.63686e-14	-3.0422	0.398974	-7.62505	2.43947e-14	6.5309e-13	2159.01	262.127	212.627
TMEM97	7688.73	1.31777	0.395141	3.33492	0.000853227	0.00253874	1.16037	0.382043	3.03727	0.0023873	0.00675941	3385.64	7567.77	8440.05
PMP22	2992.95	-2.32859	0.337789	-6.89361	5.43955e-12	8.48209e-11	-1.69478	0.326584	-5.18942	2.10952e-07	1.56914e-06	9833.91	3037.74	1957.69
GABRA4	1.34024	-2.58234	1.02545	-2.51825	0.0117939	0.0254488	-3.3785	0.99137	-3.40791	0.000654618	0.00216303	8.57586	1.44031	1.4176
SULT1E1	504.889	2.87984	0.726821	3.96223	7.42524e-05	0.000290667	3.75045	0.702837	5.33617	9.4932e-08	7.5775e-07	45.4795	612.597	516.98
PF4V1	5.65151	1.56405	0.658646	2.37464	0.017566	0.03599	1.606	0.639236	2.51237	0.0119922	0.0277228	9.80769	10.3668	8.37787
AREG	2228.26	-1.64412	0.546171	-3.01027	0.00261019	0.00679394	-1.58064	0.528061	-2.99328	0.00275992	0.0076733	6215.83	2078.16	1988.69
UCP1	8.08504	1.74061	0.70982	2.45218	0.0141993	0.029959	2.98621	0.689032	4.33391	1.46481e-05	7.30464e-05	1.31671	22.6137	13.4431
IL2	1.72995	-2.45449	0.680214	-3.6084	0.00030809	0.00102897	-2.32414	0.654205	-3.55262	0.000381415	0.00134802	7.42371	1.50794	1.36102
CPE	1415.88	-1.47989	0.351395	-4.21147	2.5371e-05	0.000110711	-1.00066	0.339736	-2.94541	0.00322522	0.00880293	2972.63	1485.65	1065.7
WFS1	3523.26	-1.11273	0.205459	-5.41582	6.10098e-08	4.72147e-07	-1.07347	0.198644	-5.40396	6.51857e-08	5.37205e-07	7123.28	3384.59	3293.72
SOD3	1872.91	-2.37704	0.402952	-5.89906	3.6558e-09	3.52089e-08	-1.62782	0.389583	-4.17836	2.93618e-05	0.000137477	6007.16	1943.85	1156.37
NEIL3	175.226	1.84044	0.315622	5.83116	5.50443e-09	5.14824e-08	2.01703	0.305382	6.60493	3.97693e-11	6.2745e-10	46.8988	188.753	166.983
SH3D19	2228.35	-1.76415	0.180181	-9.791	1.23072e-22	1.00301e-20	-1.53243	0.174198	-8.79705	1.40463e-18	8.02858e-17	6205.73	2145.05	1826.66
NKX3-2	25.6534	2.69099	0.494947	5.43694	5.42046e-08	4.24731e-07	3.32696	0.48093	6.91776	4.58827e-12	8.47745e-11	3.10836	30.3389	19.5374
HGFAC	16.8738	1.58985	0.452231	3.51557	0.000438807	0.00140775	1.63739	0.43847	3.73433	0.000188216	0.000721477	5.66034	17.6353	16.9984
KLHL5	1140.99	-1.84446	0.257058	-7.17529	7.21557e-13	1.30743e-11	-1.47062	0.24852	-5.91752	3.26823e-09	3.52384e-08	3146.56	1135.11	875.968
FAM149A	271.036	-1.86467	0.39888	-4.67476	2.94293e-06	1.60609e-05	-2.04643	0.385636	-5.30664	1.11665e-07	8.76992e-07	948.643	229.641	260.458
NCAPG	1147.98	1.98518	0.247843	8.00984	1.14859e-15	3.26011e-14	2.01935	0.239674	8.42544	3.59412e-17	1.60041e-15	295.478	1196.73	1168.76
PPARGC1A	116.471	-2.09936	0.628005	-3.34291	0.000829056	0.00247269	-1.94478	0.607132	-3.20322	0.00135898	0.00411739	411.175	106.733	95.9542
CRYAB	1578.53	-4.4071	0.415856	-10.5977	3.0554e-26	4.34931e-24	-3.47579	0.402048	-8.64522	5.36996e-18	2.81854e-16	13516.7	1214.97	637.021
CTSC	12214.6	1.23689	0.307879	4.01745	5.88305e-05	0.000236051	1.29716	0.297673	4.35767	1.31452e-05	6.62959e-05	5189.33	12752.6	12230.8
CCDC34	838.314	1.08251	0.192903	5.61169	2.00359e-08	1.69736e-07	1.19377	0.186542	6.39946	1.55924e-10	2.17559e-09	384.918	880.783	815.349
ZBTB16	100.346	-3.61299	0.523477	-6.90191	5.13072e-12	8.03385e-11	-3.78902	0.506045	-7.48752	7.0186e-14	1.73451e-12	863.24	62.4686	70.603
NRXN2	150.172	-2.72669	0.41787	-6.5252	6.79127e-11	8.97384e-10	-1.84379	0.403875	-4.56525	4.98905e-06	2.76827e-05	555.185	154.658	83.779
FOLR1	89.334	2.78018	0.648727	4.2856	1.82249e-05	8.23581e-05	3.24494	0.627756	5.16912	2.35204e-07	1.72979e-06	10.7421	348.053	129.377
ARHGEF17	1743.54	-1.5186	0.203723	-7.45423	9.03933e-14	1.89988e-12	-1.28913	0.19696	-6.54513	5.94452e-11	8.99408e-10	4196.39	1716.9	1464.39
APOC3	10.6151	5.90157	1.57261	3.75273	0.000174921	0.00062038	5.37761	1.52507	3.52613	0.000421679	0.00147249	0.0719543	24.5824	28.6059
CEP126	213.678	-1.64274	0.287535	-5.71318	1.10884e-08	9.82327e-08	-1.63522	0.277961	-5.88292	4.03101e-09	4.28717e-08	610.279	196.315	195.217
UPK2	17216	2.2683	0.628638	3.60827	0.000308248	0.00102932	2.04955	0.607798	3.3721	0.000745973	0.0024316	4085.79	16914.7	19683.9
HIPK3	3138.9	-1.79648	0.172953	-10.3871	2.83795e-25	3.50823e-23	-1.55705	0.167211	-9.31185	1.25625e-20	1.1256e-18	8890.05	3021.04	2559.03
CD5	247.953	-1.1227	0.400004	-2.80671	0.00500496	0.0119999	-1.14631	0.386726	-2.96415	0.00303524	0.00834617	519.403	234.709	238.581
MDK	15856.5	1.67394	0.292578	5.72135	1.05678e-08	9.42427e-08	1.47297	0.28288	5.20704	1.91872e-07	1.43981e-06	5628.4	15624.7	17960.2
NAA40	1620.16	1.24056	0.135846	9.13207	6.72009e-20	3.62846e-18	1.1514	0.131373	8.76434	1.8788e-18	1.05234e-16	732.886	1627.87	1731.78
SLC35F2	1182.85	1.12622	0.238962	4.71296	2.44141e-06	1.36206e-05	1.30216	0.23106	5.63557	1.74478e-08	1.63897e-07	512.108	1263.27	1118.28
VWF	6300.26	-1.29443	0.261228	-4.95516	7.22693e-07	4.51293e-06	-1.09044	0.252565	-4.31746	1.57835e-05	7.83084e-05	13327.1	6258.68	5433.5
CD69	373.077	-1.28418	0.453585	-2.83118	0.00463763	0.0112237	-1.29217	0.438535	-2.94656	0.00321325	0.00877395	857.689	350.286	352.163
CORO1C	5901.78	-1.43519	0.216009	-6.64413	3.05021e-11	4.2549e-10	-1.2861	0.208845	-6.15816	7.35961e-10	9.01002e-09	13936.7	5714.63	5153.54
TSPAN11	356.097	-2.0867	0.362597	-5.75489	8.66972e-09	7.85458e-08	-1.54419	0.350531	-4.40529	1.05642e-05	5.42589e-05	1052.88	361.134	247.896
KCTD10	3381.27	-1.1263	0.115983	-9.71097	2.70749e-22	2.05966e-20	-1.00219	0.112132	-8.9376	3.97709e-19	2.55737e-17	6640.64	3314.73	3041.45
CYP27B1	250.681	2.4932	0.296967	8.39556	4.63679e-17	1.60452e-15	2.39438	0.287389	8.3315	7.9826e-17	3.30602e-15	48.2796	254.736	272.882
KRT18	52257.9	1.51139	0.316068	4.78185	1.73687e-06	9.98342e-06	1.61128	0.305589	5.2727	1.34434e-07	1.03884e-06	17960.8	54875.1	51204.2
TNS2	2000.09	-2.26035	0.231418	-9.76739	1.55404e-22	1.23939e-20	-2.02558	0.223736	-9.05343	1.38546e-19	9.81266e-18	7486.07	1838.71	1562.5
GLI1	86.5691	-1.72656	0.38522	-4.482	7.39464e-06	3.66998e-05	-1.50146	0.372342	-4.03248	5.51906e-05	0.000241573	237.107	83.8449	71.693
SLC6A12	83.3394	1.31076	0.407031	3.22028	0.00128064	0.00363147	1.3427	0.393749	3.41004	0.000649541	0.00214879	34.0128	86.4018	84.5504
FOXM1	2866.79	2.03547	0.269037	7.56578	3.85545e-14	8.69675e-13	2.0859	0.260136	8.0185	1.07044e-15	3.6789e-14	706.986	3000.33	2897.31
RAD51AP1	633.334	1.78543	0.244497	7.30248	2.82511e-13	5.50662e-12	1.84017	0.236465	7.78199	7.13904e-15	2.08601e-13	184.942	661.36	636.741
KCNA1	5.70803	-3.75663	0.806719	-4.65668	3.21343e-06	1.73957e-05	-2.26234	0.776421	-2.91381	0.00357046	0.00961105	28.3586	5.93725	50.8486
ALDH2	3024.03	-1.94724	0.367932	-5.29239	1.2073e-07	8.76892e-07	-1.71485	0.35573	-4.82064	1.43096e-06	8.95405e-06	9388.89	2860.16	2434.66
OAS3	6828.79	1.61411	0.27088	5.95877	2.54139e-09	2.5226e-08	1.27379	0.261904	4.86358	1.15283e-06	7.37179e-06	2675.79	6470.51	8191.9
OAS2	5404.25	1.50561	0.335943	4.48173	7.40407e-06	3.67311e-05	1.18506	0.32481	3.64848	0.0002638	0.000974261	2264.29	5148.81	6429.82
MGP	9454.02	-3.07603	0.433242	-7.10002	1.24737e-12	2.15029e-11	-1.45994	0.418874	-3.4854	0.000491402	0.00168289	30062.2	10927.8	3564.86
RERGL	28.5477	-3.62416	0.540237	-6.70847	1.96678e-11	2.82753e-10	-3.42413	0.521925	-6.56058	5.36004e-11	8.22434e-10	220.363	20.5952	17.8741
RFC5	1245.59	1.17236	0.150208	7.80495	5.95272e-15	1.5156e-13	1.08618	0.145261	7.47744	7.57817e-14	1.84712e-12	588.075	1248.54	1325.41
STX2	437.306	-1.71189	0.289095	-5.92156	3.18909e-09	3.1145e-08	-1.2548	0.279474	-4.48986	7.12696e-06	3.80546e-05	1071.33	448.821	326.898
ADGRD1	348.925	-4.87994	0.52271	-9.33585	1.0018e-20	5.91945e-19	-3.87513	0.50529	-7.66914	1.73159e-14	4.73414e-13	3533.78	240.842	119.959
IL26	2.62412	-1.68329	0.567807	-2.96455	0.00303131	0.00773049	-1.84746	0.547732	-3.37293	0.000743724	0.00242588	8.12614	3.70266	2.55377
IFNG	33.7848	2.06399	0.616267	3.34918	0.000810517	0.00242394	1.49416	0.596449	2.5051	0.0122416	0.0282093	10.6904	30.2721	44.9089
NUP107	2830.5	1.02737	0.208237	4.93365	8.07053e-07	4.98669e-06	1.06058	0.201342	5.26757	1.38238e-07	1.06473e-06	1398.73	3211.49	3370.24
TIMELESS	2939.56	1.46346	0.169047	8.65711	4.83895e-18	1.93455e-16	1.47398	0.163459	9.01741	1.92594e-19	1.30723e-17	1089.68	3027.36	3005.34
ACRBP	136.87	1.18312	0.29594	3.99783	6.39252e-05	0.000254374	1.15526	0.286284	4.03538	5.45143e-05	0.000238827	62.5007	139.33	142.052
CDCA3	1268.38	2.2177	0.230522	9.62033	6.56172e-22	4.68801e-20	2.1113	0.222934	9.47053	2.78434e-21	3.02379e-19	296.397	1279.47	1377.41
NT5DC3	685.144	-3.13328	0.243849	-12.8493	8.68446e-38	6.79921e-35	-2.72948	0.235725	-11.5791	5.26082e-31	3.30584e-28	3830.84	577.56	436.405
SLCO1B3	91.1922	4.48288	1.08335	4.13798	3.5038e-05	0.000147582	4.57575	1.0484	4.36451	1.27408e-05	6.44558e-05	11.4707	97.7002	91.5967
GYS2	4.92298	-1.81799	0.420806	-4.32026	1.55849e-05	7.14591e-05	-2.52017	0.406892	-6.19369	5.87709e-10	7.35423e-09	51.4071	3.46794	9.35358
ST8SIA1	173.914	-2.31046	0.382418	-6.0417	1.52496e-09	1.59012e-08	-1.87189	0.369657	-5.06385	4.10871e-07	2.86131e-06	616.15	168.309	124.216
KLRB1	98.8378	-2.21674	0.365507	-6.06484	1.32086e-09	1.38886e-08	-2.01216	0.353274	-5.69574	1.22836e-08	1.18636e-07	365.132	90.6096	78.6297
CEP85L	293.117	-1.74557	0.210651	-8.28657	1.1656e-16	3.82895e-15	-1.81836	0.203629	-8.92977	4.26892e-19	2.73603e-17	917.82	260.148	273.525
FAM184A	122.161	-1.78656	0.356016	-5.0182	5.21567e-07	3.3597e-06	-1.28019	0.344098	-3.72044	0.00019888	0.000757246	306.036	125.841	88.5435
SERINC1	5960.78	-1.23665	0.139871	-8.84138	9.45469e-19	4.29115e-17	-1.15013	0.13523	-8.50496	1.81654e-17	8.59798e-16	12788.9	5762.08	5426.56
TPD52L1	1756.99	-1.7649	0.331399	-5.32559	1.00624e-07	7.45551e-07	-1.16565	0.320403	-3.63808	0.000274683	0.00100987	4157.37	1853.08	1223.21
NCOA7	2648.17	-1.20843	0.259956	-4.64859	3.34215e-06	1.80198e-05	-1.22656	0.251335	-4.88021	1.05974e-06	6.83918e-06	5830.78	2491.74	2523.25
ULBP1	55.2962	2.8926	0.416306	6.94825	3.69855e-12	5.95507e-11	3.17284	0.403853	7.85643	3.95243e-15	1.20346e-13	6.80325	61.3369	50.4572
RHAG	0.962242	-3.80255	0.882199	-4.31031	1.63027e-05	7.43695e-05	-3.91225	0.847444	-4.61653	3.90215e-06	2.21485e-05	8.82194	0.584184	0.630258
PHACTR1	242.227	-1.16194	0.323868	-3.58768	0.000333631	0.00110582	-1.53039	0.313125	-4.88748	1.02135e-06	6.61546e-06	597.813	206.839	267.072
GLP1R	18.6364	3.46133	0.668499	5.17777	2.24552e-07	1.55237e-06	1.5148	0.648526	2.33576	0.0195038	0.0422029	3.54385	14.3562	54.3198
BMP5	156.269	-2.90386	0.589639	-4.92481	8.4441e-07	5.19361e-06	-3.60244	0.570084	-6.31915	2.63008e-10	3.53839e-09	1125.43	92.673	150.377
RBM24	95.4878	-4.00334	0.509523	-7.85703	3.93351e-15	1.03227e-13	-2.82764	0.492339	-5.74327	9.28661e-09	9.18233e-08	619.593	87.1979	38.6054
CAP2	494.143	-2.45307	0.32055	-7.65267	1.96848e-14	4.64671e-13	-2.1994	0.309893	-7.09731	1.27208e-12	2.56886e-11	2037.72	443.599	372.04
BAG2	860.712	-3.19423	0.30053	-10.6287	2.1922e-26	3.21808e-24	-2.50317	0.290533	-8.61579	6.94614e-18	3.53055e-16	4491.47	792.188	490.632
RAB23	655.056	-3.4517	0.294631	-11.7153	1.06372e-31	3.38767e-29	-2.86449	0.28482	-10.0572	8.53971e-24	1.56013e-21	4067.65	558.414	371.624
FHL5	46.9491	-2.57162	0.387883	-6.62989	3.35928e-11	4.65837e-10	-2.31396	0.374755	-6.17459	6.63362e-10	8.19685e-09	207.542	41.877	34.962
KHDRBS2	4.69755	-1.62215	0.628165	-2.58236	0.00981276	0.0216792	-2.82404	0.608082	-4.64418	3.41433e-06	1.96593e-05	19.9638	5.58921	6.43181
PRDM13	9.34562	4.27492	0.972625	4.39524	1.10649e-05	5.25686e-05	5.15973	0.947016	5.44841	5.08231e-08	4.26391e-07	0.223174	14.1663	6.23441
E2F3	2179.04	1.20982	0.278639	4.34189	1.41261e-05	6.54735e-05	1.16999	0.269411	4.34277	1.40697e-05	7.04314e-05	985.147	2427.32	2278.69
SIM1	5.3965	2.5998	1.03842	2.50362	0.012293	0.0263862	2.72401	1.00798	2.70244	0.00688326	0.0171494	14.7345	8.58154	36.5751
HDGFL1	6.96169	2.44665	0.756724	3.23321	0.00122407	0.00349178	3.0979	0.736377	4.20695	2.58838e-05	0.00012272	0.914751	9.7434	5.07804
BVES	325.499	-3.27104	0.420174	-7.78498	6.97269e-15	1.76335e-13	-2.68118	0.406185	-6.60089	4.08706e-11	6.43268e-10	1843.55	287.379	190.88
B3GAT2	33.9843	-1.98384	0.286407	-6.92663	4.30978e-12	6.83383e-11	-1.78949	0.276523	-6.47139	9.71022e-11	1.41865e-09	109.973	31.6618	27.7281
EYA4	96.3518	-2.24998	0.450188	-4.99787	5.79675e-07	3.6985e-06	-1.72694	0.435128	-3.96881	7.22329e-05	0.000308366	317.677	95.9438	66.7417
SOBP	266.503	-3.8823	0.334786	-11.5964	4.29936e-31	1.2823e-28	-3.01643	0.32356	-9.32262	1.13501e-20	1.04657e-18	1840.31	227.464	124.784
NR2E1	21.7311	1.8659	0.618054	3.01898	0.00253623	0.00662807	1.88274	0.598465	3.14595	0.00165547	0.00490618	6.08493	26.7094	22.3723
EPM2A	253.428	-2.78299	0.195263	-14.2525	4.32465e-46	2.70867e-42	-2.67391	0.1887	-14.1702	1.40158e-45	1.3699e-41	1331.52	208.498	193.224
CCR6	4.28294	-1.8609	0.528511	-3.52103	0.000429874	0.00138098	-1.5804	0.509231	-3.10351	0.0019124	0.00557741	12.359	4.1543	3.39778
MDFI	3048.03	1.63617	0.339155	4.82425	1.40528e-06	8.24134e-06	1.29153	0.32792	3.93856	8.19714e-05	0.000344597	1172.26	2870.05	3644.4
SMOC2	1792.24	-3.87767	0.421242	-9.20533	3.40627e-20	1.92782e-18	-2.67163	0.407257	-6.56006	5.3786e-11	8.24047e-10	10778.8	1691.77	733.252
SRF	3572.46	-1.76121	0.135175	-13.0291	8.36255e-39	7.14237e-36	-1.69341	0.130688	-12.9577	2.1254e-38	5.93533e-35	10630.8	3286.89	3135.89
TTK	967.657	2.20704	0.243029	9.08138	1.07209e-19	5.53421e-18	2.2356	0.235042	9.51152	1.87893e-21	2.11167e-19	214.534	1009.09	989.333
WISP3	239.001	1.24486	0.518591	2.40047	0.0163739	0.0338876	1.22642	0.501452	2.44574	0.0144557	0.0325853	104.729	245.346	248.482
LAMA4	3361.39	-2.07655	0.284421	-7.30096	2.85716e-13	5.54608e-12	-1.51795	0.274986	-5.52009	3.38819e-08	2.97006e-07	9826.88	3431.3	2329.67
FAM46A	1389.74	-1.60913	0.237329	-6.78015	1.20055e-11	1.77905e-10	-1.50501	0.229452	-6.55915	5.41137e-11	8.27783e-10	3725.75	1312.76	1221.27
PRSS16	743.099	1.44466	0.276251	5.22952	1.6995e-07	1.20413e-06	1.3243	0.267132	4.95749	7.14096e-07	4.75448e-06	296.905	744.276	809.075
MEP1A	15.1178	2.06732	0.622149	3.32287	0.000890972	0.00264184	2.60649	0.603429	4.31947	1.56405e-05	7.76581e-05	2.63563	48.0056	23.3586
TBX18	241.025	-1.2011	0.521746	-2.30207	0.0213311	0.042522	-1.2003	0.504433	-2.3795	0.0173363	0.0382321	526.009	228.895	228.767
C7	1384.97	-4.98952	0.638932	-7.80915	5.7573e-15	1.46983e-13	-3.69573	0.617726	-5.9828	2.19334e-09	2.44583e-08	13348.5	1030.18	420.157
GHR	138.265	-2.62084	0.415544	-6.30701	2.84477e-10	3.33249e-09	-2.51785	0.401695	-6.26807	3.65546e-10	4.78613e-09	668.301	116.701	108.642
KIF20A	1857.08	1.98846	0.24877	7.99315	1.31537e-15	3.70551e-14	1.97794	0.240552	8.22249	1.99319e-16	7.71541e-15	486.398	1914.98	1929.08
HBEGF	2113.13	-2.85269	0.335171	-8.51112	1.72256e-17	6.28483e-16	-2.80778	0.324053	-8.66455	4.53281e-18	2.42097e-16	11801.7	1685.52	1633.87
SLC4A9	16.3631	1.4341	0.445215	3.22114	0.00127682	0.00362243	1.1652	0.431531	2.70015	0.00693092	0.0172527	6.98994	15.789	19.0741
HAND1	45.8113	-5.42162	0.86715	-6.25223	4.04644e-10	4.61363e-09	-4.23409	0.837852	-5.05351	4.33771e-07	3.00899e-06	533.811	28.3856	12.4235
PCDHB15	157.391	-1.23765	0.336795	-3.67477	0.000238061	0.000813598	-1.02544	0.325577	-3.14962	0.00163482	0.00485161	320.3	157.288	135.803
HAVCR1	104.84	5.33856	0.864272	6.17695	6.53532e-10	7.21921e-09	6.09552	0.838336	7.27097	3.56904e-13	7.78656e-12	1.8427	201.289	136.206
ITK	186.947	-1.31675	0.42651	-3.08728	0.00201997	0.00542606	-1.0504	0.41233	-2.54747	0.0108506	0.0254143	390.254	188.458	156.682
GABRG2	34.3051	3.20413	1.14767	2.79186	0.00524061	0.0124852	3.69543	1.11074	3.32701	0.000877837	0.00280988	3.03574	39.6527	28.222
LMNB1	3336.34	1.51892	0.213214	7.1239	1.04916e-12	1.83553e-11	1.60282	0.206158	7.7747	7.56259e-15	2.19338e-13	1153.33	3502.98	3305.13
NPR3	140.066	-1.001	0.417863	-2.39552	0.0165969	0.0342888	-1.05945	0.403987	-2.6225	0.00872881	0.0211386	276.213	132.487	138.021
FAM172A	760.417	-1.07143	0.144018	-7.43958	1.01007e-13	2.10413e-12	-1.16648	0.139231	-8.37802	5.38244e-17	2.30232e-15	1586.94	706.647	754.731
IRX4	48.8473	2.54563	0.845804	3.00971	0.00261495	0.00680351	3.30171	0.818466	4.03402	5.48295e-05	0.000240047	14.4308	76.3874	96.4364
PDE4D	1149.96	-2.40122	0.247423	-9.70489	2.87382e-22	2.17738e-20	-2.33849	0.239207	-9.77598	1.42765e-22	2.08266e-20	4985.36	985.685	943.715
LIFR	805.789	-2.16089	0.370358	-5.8346	5.39207e-09	5.05826e-08	-2.19857	0.358069	-6.14008	8.24793e-10	1.00268e-08	3176.5	691.971	710.306
C9	9.17542	1.86721	0.522108	3.57629	0.000348512	0.00114625	1.36021	0.507079	2.68245	0.0073086	0.0180915	3.26836	8.33165	11.8185
DPYSL3	6894.82	-3.10649	0.378002	-8.21817	2.0663e-16	6.58064e-15	-2.1582	0.365466	-5.90533	3.5194e-09	3.77385e-08	30755	6890.18	3570.76
CPEB4	1216.33	-1.9528	0.20594	-9.48236	2.48597e-21	1.61074e-19	-1.71056	0.199096	-8.5916	8.57648e-18	4.27686e-16	3783.62	1155.83	977.248
KNG1	8.84685	4.34175	1.06662	4.07057	4.68977e-05	0.000192361	3.79654	1.03718	3.66043	0.000251789	0.000935915	0.616137	12.154	20.7902
HRG	9.36274	4.58619	0.953213	4.8113	1.49954e-06	8.74773e-06	3.44589	0.928055	3.71303	0.000204795	0.000778556	0.686938	12.469	21.5379
AMOTL2	2691.8	-1.3654	0.262407	-5.20336	1.95715e-07	1.37066e-06	-1.10848	0.253703	-4.36921	1.24699e-05	6.31836e-05	5813.36	2695.92	2256.08
BCHE	174.612	-4.11331	0.551996	-7.45171	9.21347e-14	1.93431e-12	-3.05131	0.533554	-5.71884	1.07256e-08	1.0499e-07	1249.56	150.683	72.1604
LRRC31	14.7479	2.67597	0.604075	4.42987	9.42907e-06	4.55955e-05	2.25282	0.586361	3.84203	0.00012202	0.000489984	2.8057	19.0505	18.4743
PFKFB4	1008.08	2.38826	0.251038	9.51353	1.84296e-21	1.24119e-19	2.34011	0.242789	9.63842	5.503e-22	7.07715e-20	203.222	1029.38	1064.32
COL7A1	11786.2	2.2069	0.383744	5.75098	8.87263e-09	8.03454e-08	2.38083	0.371025	6.41691	1.39067e-10	1.97277e-09	2434.09	12677.6	11237.7
ECT2	2224.97	1.59038	0.225284	7.05943	1.67182e-12	2.82495e-11	1.71372	0.217834	7.86707	3.63044e-15	1.10888e-13	718.709	2357.18	2164.05
PLXNA1	6790.17	1.42117	0.194726	7.29833	2.91351e-13	5.64963e-12	1.28725	0.188276	6.83706	8.08351e-12	1.43681e-10	2769.35	6758.35	7415.76
PODXL2	2502.74	2.03044	0.357058	5.68658	1.29607e-08	1.13218e-07	2.15796	0.345236	6.25067	4.08708e-10	5.31211e-09	597.288	2666.3	2440.77
EFCC1	141.37	-1.54952	0.332647	-4.65815	3.19067e-06	1.72874e-05	-1.5822	0.321571	-4.92023	8.64421e-07	5.67227e-06	386.956	129.327	132.353
PLSCR4	449.537	-2.35204	0.3062	-7.68138	1.57384e-14	3.75763e-13	-1.87199	0.296006	-6.32415	2.54625e-10	3.44219e-09	1602.86	437.855	313.858
ARHGEF26	422.859	-2.0815	0.324078	-6.42284	1.33754e-10	1.67549e-09	-1.95241	0.313307	-6.23163	4.61618e-10	5.94447e-09	1489.74	384.819	351.797
ZBTB47	979.881	-1.59565	0.171417	-9.30857	1.29563e-20	7.56055e-19	-1.45424	0.165716	-8.77548	1.70171e-18	9.67009e-17	2559.56	933.9	846.642
TNNC1	492.996	1.6169	0.525971	3.07413	0.00211117	0.00563959	1.61958	0.50857	3.18458	0.00144965	0.00436436	165.778	509.64	508.723
CLCN2	544.758	1.39128	0.171828	8.0969	5.63765e-16	1.68681e-14	1.49053	0.166216	8.96745	3.0346e-19	2.00407e-17	204.038	573.849	535.673
RTKN	2047	1.21837	0.253592	4.80447	1.5516e-06	9.01503e-06	1.59006	0.245197	6.48481	8.88445e-11	1.30581e-09	757.25	2280.05	1762.18
IL1A	1646.21	1.54519	0.545147	2.83445	0.0045904	0.0111295	1.29567	0.527083	2.45819	0.0139638	0.0316386	648.661	1592.61	1893.36
CCL20	523.086	2.02578	0.588089	3.44468	0.000571731	0.00178393	2.03887	0.568637	3.58553	0.000336391	0.00120822	216.22	771.669	719.908
KCNIP3	158.479	-1.96185	0.370224	-5.29909	1.16381e-07	8.49091e-07	-1.3355	0.357848	-3.73203	0.000189939	0.000727456	418.485	165.734	107.359
STEAP3	3325.67	1.2267	0.238289	5.14796	2.63333e-07	1.79928e-06	1.06252	0.230397	4.61171	3.99377e-06	2.26028e-05	1568.02	3275.35	3670.18
OTOF	130.92	2.98914	0.487133	6.13619	8.45215e-10	9.16422e-09	2.82688	0.471436	5.99632	2.01833e-09	2.27141e-08	18.2861	158.606	187.859
CENPA	548.514	2.51013	0.266805	9.40809	5.05239e-21	3.14352e-19	2.66207	0.258111	10.3137	6.11162e-25	1.42708e-22	93.222	588.799	529.976
SLC30A3	37.335	1.32023	0.517783	2.54978	0.0107791	0.0235346	2.16793	0.50105	4.32677	1.51312e-05	7.53205e-05	10.0641	75.9561	30.6702
PDE1A	197.047	-3.63706	0.355491	-10.2311	1.43866e-24	1.58085e-22	-2.75595	0.343552	-8.02193	1.04099e-15	3.60166e-14	1198.47	177.484	96.2947
REEP6	2611.53	1.00949	0.41768	2.41689	0.0156539	0.0325337	1.26107	0.403837	3.12272	0.00179191	0.00526028	1179.44	2827.27	2374.83
PCSK4	162.482	1.43184	0.31169	4.59378	4.35289e-06	2.27576e-05	1.11132	0.301513	3.6858	0.000227983	0.000856384	71.3966	154.423	192.806
MOGS	5063.2	1.14881	0.123923	9.27035	1.85542e-20	1.07272e-18	1.14017	0.119824	9.51535	1.81095e-21	2.08238e-19	2347.91	5176.74	5207.87
GRB14	77.4184	1.36665	0.398929	3.42579	0.000613012	0.00189886	1.63522	0.385957	4.23679	2.26741e-05	0.000108902	27.2333	84.3855	90.0491
CLIP4	1124.37	-1.6658	0.279222	-5.96586	2.43351e-09	2.43481e-08	-1.40455	0.269953	-5.20293	1.96174e-07	1.46871e-06	2912.79	1100.14	917.896
TLX2	23.0193	2.66794	0.486011	5.48948	4.03123e-08	3.21916e-07	2.64117	0.471954	5.59625	2.1904e-08	2.00647e-07	3.84952	27.9655	34.5167
TACR1	60.6866	-2.90762	0.438972	-6.6237	3.50324e-11	4.8437e-10	-2.39663	0.424164	-5.65024	1.6022e-08	1.51523e-07	291.786	55.4447	38.9358
EVA1A	260.563	3.16899	0.463323	6.8397	7.93609e-12	1.2094e-10	3.95916	0.448372	8.83008	1.046e-18	6.25297e-17	20.2895	316.27	182.863
EFEMP1	3166.14	-2.03887	0.51173	-3.98426	6.7691e-05	0.000267997	-1.23157	0.49476	-2.48923	0.012802	0.0293141	8054.15	3429.9	1959.93
REG1A	6.3865	4.23458	1.30821	3.23692	0.00120827	0.00345613	4.85803	1.26967	3.8262	0.000130137	0.000519484	0.080525	27.5785	9.30728
IGFBP5	14350.5	-2.15294	0.422321	-5.09789	3.43465e-07	2.29261e-06	-1.61183	0.408318	-3.94748	7.8979e-05	0.000333596	44285.7	14489.5	9957.72
OTX1	240.68	2.33433	0.307235	7.59787	3.01046e-14	6.8732e-13	2.46585	0.297305	8.294	1.09502e-16	4.40442e-15	46.4958	257.213	234.777
GNLY	581.76	1.86707	0.501814	3.72064	0.000198722	0.000694178	1.76516	0.485218	3.63787	0.0002749	0.00101048	173.414	589.487	808.238
PLCD4	201.947	-3.09148	0.220826	-13.9996	1.56665e-44	7.35933e-41	-2.88943	0.213385	-13.5409	8.96663e-42	4.38199e-38	1204.44	162.557	141.201
IL1RL1	93.435	-1.42935	0.499628	-2.86083	0.00422535	0.0103405	-1.13596	0.48299	-2.35192	0.0186767	0.0406653	206.76	94.0961	293.866
PROC	118.021	1.92247	0.412991	4.65499	3.23995e-06	1.7518e-05	1.60402	0.399544	4.01463	5.95396e-05	0.000259216	37.063	113.179	141.134
ODC1	4709.56	-1.63588	0.291996	-5.6024	2.11401e-08	1.78481e-07	-1.54952	0.282313	-5.48866	4.04998e-08	3.48455e-07	12902.7	4407.9	4151.74
DLX2	14.0248	2.3368	0.598338	3.90548	9.40391e-05	0.000357691	2.27038	0.580589	3.91047	9.21152e-05	0.00038174	2.93141	21.4839	20.6452
PLCL1	130.057	-2.85686	0.301325	-9.481	2.51847e-21	1.62619e-19	-2.37359	0.291168	-8.15194	3.5813e-16	1.3184e-14	616.36	118.86	85.0601
RND3	3966.32	-1.63963	0.260488	-6.29443	3.08526e-10	3.59628e-09	-1.57514	0.251849	-6.25429	3.99321e-10	5.19356e-09	11002.8	3692.71	3531.25
TRAK2	1646.96	-1.41515	0.153903	-9.19507	3.74766e-20	2.10643e-18	-1.29528	0.14879	-8.70543	3.16382e-18	1.72274e-16	3895.39	1586.72	1460.21
KISS1R	23.7552	2.72604	0.573337	4.7547	1.98741e-06	1.12922e-05	2.57328	0.556043	4.62784	3.69507e-06	2.11202e-05	4.00719	31.2462	26.5181
ARID3A	1349.15	1.57687	0.388389	4.06003	4.90659e-05	0.000200598	2.07227	0.375532	5.51822	3.4246e-08	2.9966e-07	363.122	1527.17	1083.34
GRIN3B	36.2219	2.51627	0.390705	6.44033	1.19214e-10	1.50136e-09	2.9152	0.379436	7.683	1.55407e-14	4.27873e-13	5.40258	40.9172	44.5465
VAX2	68.5846	1.9148	0.457959	4.18116	2.90031e-05	0.000124422	2.27566	0.443224	5.13433	2.83154e-07	2.047e-06	15.7837	76.5412	59.5897
ATP6V1B1	207.315	2.35901	0.501317	4.70563	2.53087e-06	1.40529e-05	3.01936	0.484924	6.22646	4.77086e-10	6.10745e-09	30.171	296.451	155.167
PARD3B	392.634	-2.5934	0.295365	-8.78032	1.63015e-18	7.00926e-17	-2.30513	0.285529	-8.07319	6.8484e-16	2.42963e-14	1740.37	352.073	288.269
TPSG1	12.6172	-3.83926	0.407496	-9.42157	4.44389e-21	2.78336e-19	-3.05678	0.391951	-7.7989	6.24484e-15	1.84402e-13	87.7862	10.5716	6.1334
ANGPTL1	215.38	-4.5911	0.538737	-8.52197	1.56856e-17	5.75649e-16	-2.80032	0.520674	-5.37826	7.52086e-08	6.11555e-07	1441.08	206.893	59.7471
CHD5	24.6348	-2.91928	0.485758	-6.00975	1.85813e-09	1.90062e-08	-2.36149	0.469062	-5.03449	4.79118e-07	3.30363e-06	117.02	22.8009	15.368
ERRFI1	6375.53	-1.44079	0.283975	-5.07367	3.90224e-07	2.57365e-06	-1.30064	0.274558	-4.73719	2.16698e-06	1.29979e-05	15147	6148.95	5579.69
RAP1A	3559.79	-1.6387	0.123791	-13.2376	5.3209e-40	6.24873e-37	-1.505	0.11968	-12.5752	2.88985e-36	4.70756e-33	9587.92	3377.57	3078.7
MEF2D	2709.59	-1.47712	0.118194	-12.4974	7.71062e-36	4.67363e-33	-1.30315	0.114266	-11.4046	3.96756e-30	2.15438e-27	6494.27	2631.31	2332.37
FBXO2	622.722	1.34408	0.422231	3.18328	0.00145616	0.0040704	1.54882	0.408261	3.79371	0.000148414	0.000583154	229.787	847.98	583.691
FBXO6	1111.1	1.2726	0.19856	6.40916	1.4632e-10	1.81956e-09	1.08974	0.192008	5.67548	1.383e-08	1.32395e-07	513.109	1092.26	1239.93
C1orf21	2695.46	-1.41066	0.217264	-6.49283	8.42364e-11	1.09234e-09	-1.34448	0.210057	-6.40057	1.548e-10	2.1661e-09	6492.66	2556.7	2442.11
LEPR	401.201	-2.33855	0.284849	-8.20978	2.21592e-16	7.03329e-15	-2.06917	0.275364	-7.51431	5.72139e-14	1.43203e-12	1548.94	369.074	306.225
MIIP	2042.39	1.05756	0.177815	5.94755	2.72186e-09	2.6833e-08	1.07617	0.171934	6.25919	3.8697e-10	5.04636e-09	997.141	2102.3	2075.41
PLA2G4A	765.616	-1.26236	0.316898	-3.9835	6.79063e-05	0.000268736	-1.2482	0.306382	-4.074	4.62117e-05	0.000206102	1665.91	701.277	694.454
GADD45A	2678.24	-1.2013	0.218456	-5.49906	3.81812e-08	3.06713e-07	-1.02585	0.211209	-4.85705	1.1915e-06	7.59419e-06	5395.57	2649.96	2346.48
WLS	3619.3	-1.49594	0.279994	-5.34277	9.15388e-08	6.84719e-07	-1.33396	0.270708	-4.92768	8.32098e-07	5.48226e-06	8808.88	3494.23	3123.05
RGS2	2751.22	-3.63989	0.349256	-10.4218	1.97135e-25	2.53711e-23	-2.59921	0.337664	-7.69761	1.38636e-14	3.85499e-13	15685.8	2588.67	1258.34
AGMAT	275.584	1.45072	0.26179	5.54155	2.99814e-08	2.45683e-07	1.31678	0.253223	5.20009	1.99192e-07	1.48846e-06	110.129	274.985	301.781
OLFML3	1508.04	-2.78919	0.407523	-6.84425	7.68768e-12	1.1725e-10	-1.44187	0.393991	-3.65965	0.000252556	0.000938408	4611.76	1697.61	667.148
TNNI3K	4.72423	-1.46499	0.444377	-3.29673	0.000978166	0.0028678	-1.73132	0.429065	-4.03509	5.45811e-05	0.000239066	13.514	4.05229	4.88621
NID1	4226.02	-1.5264	0.283991	-5.37484	7.6652e-08	5.81701e-07	-1.06947	0.274571	-3.89504	9.81833e-05	0.000403962	9221.53	4393.86	3201.04
BMP8B	641.64	1.31444	0.326124	4.0305	5.56576e-05	0.000224615	1.87827	0.315349	5.95617	2.5822e-09	2.84057e-08	201.234	740.541	500.923
MYCL	6522.15	1.05644	0.421112	2.50869	0.0121179	0.026061	1.10209	0.407153	2.70682	0.00679314	0.0169529	3135.19	6730.68	6521.02
KMO	86.8191	1.30566	0.374204	3.48916	0.000484545	0.00153716	1.19094	0.362016	3.28974	0.00100279	0.00315579	38.0177	86.9719	94.1492
KCNQ4	117.198	-2.59948	0.386615	-6.72371	1.77159e-11	2.56655e-10	-2.62295	0.373719	-7.01852	2.24228e-12	4.36575e-11	583.153	94.6271	96.2263
RIMS3	240.856	-1.02967	0.368143	-2.79693	0.00515903	0.0123127	-1.42896	0.355936	-4.01464	5.95353e-05	0.000259216	554.088	205.626	271.227
AKT3	1228.15	-2.29238	0.316025	-7.25378	4.05312e-13	7.66179e-12	-1.77829	0.305533	-5.82028	5.87482e-09	6.00319e-08	4163.49	1213.65	849.78
ST6GALNAC5	213.199	-1.82019	0.398459	-4.56807	4.92245e-06	2.54661e-05	-1.29135	0.385187	-3.35253	0.000800778	0.00258823	540.664	220.823	153.041
SLAMF1	112.825	-1.62652	0.418802	-3.88375	0.000102858	0.000387003	-1.27858	0.404833	-3.1583	0.00158694	0.00472312	275.387	113.604	168.352
CD48	500.564	-1.05337	0.433491	-2.42998	0.0150996	0.0315844	-1.07056	0.419111	-2.55435	0.0106386	0.0249986	1002.56	477.397	483.11
MFAP2	2493.34	1.52411	0.343677	4.43472	9.21906e-06	4.46975e-05	2.01396	0.332294	6.06077	1.35473e-09	1.57633e-08	705.094	2847.79	2027.88
ACTL8	36.1397	4.5748	0.824366	5.54947	2.86529e-08	2.35515e-07	5.22959	0.801439	6.52525	6.78903e-11	1.01695e-09	6.22094	71.6162	32.0019
IGSF21	108.86	-1.43059	0.468373	-3.05439	0.00225519	0.00597673	-1.29931	0.452791	-2.86957	0.00411032	0.0108888	259.213	105.322	96.1076
CD160	18.3645	-1.12109	0.327028	-3.42812	0.000607767	0.00188386	-1.28695	0.315999	-4.07264	4.64832e-05	0.000206983	40.9101	16.6738	18.7502
CDC20	3976.62	2.35237	0.268133	8.77315	1.7374e-18	7.45336e-17	2.45436	0.259261	9.46675	2.88687e-21	3.11782e-19	770.387	4222.1	3933.94
MPL	7.26187	-1.66307	0.243278	-6.83611	8.13726e-12	1.23505e-10	-1.75527	0.234035	-7.50002	6.38085e-14	1.5829e-12	22.5211	6.44422	6.80248
ARTN	292.139	1.61723	0.369425	4.3777	1.19936e-05	5.65396e-05	1.35495	0.357263	3.79257	0.000149094	0.000585593	110.388	282.733	339.122
PTCH2	81.4105	-1.90559	0.271782	-7.01147	2.35824e-12	3.91789e-11	-1.59624	0.262581	-6.07904	1.20903e-09	1.42117e-08	238.79	79.069	63.7093
PTBP2	769.841	-1.27707	0.168285	-7.58876	3.22971e-14	7.35591e-13	-1.24049	0.162689	-7.6249	2.44224e-14	6.5309e-13	1726.49	730.322	712.1
PLPPR4	151.558	-4.0789	0.36832	-11.0743	1.67102e-28	3.52792e-26	-3.406	0.355922	-9.5695	1.0742e-21	1.28825e-19	1228.54	115.91	72.6899
SERPINC1	14.8005	2.41107	0.509726	4.73014	2.24366e-06	1.26072e-05	1.51106	0.494874	3.05342	0.00226245	0.00644888	4.18881	17.1036	31.1286
RSRP1	2820.31	1.41197	0.207672	6.79902	1.0533e-11	1.57421e-10	1.02987	0.2008	5.12885	2.91521e-07	2.10515e-06	1286.69	2627.6	3424.41
STMN1	14708.4	1.56425	0.238591	6.5562	5.51946e-11	7.37629e-10	1.7311	0.230683	7.50424	6.17856e-14	1.53467e-12	4738.33	15730.6	14012.6
NEK2	982.457	2.18961	0.246078	8.89806	5.68309e-19	2.68305e-17	2.3281	0.237989	9.7824	1.3399e-22	1.96935e-20	208.572	1046.7	950.954
PROX1	162.199	-1.67299	0.501358	-3.33692	0.000847111	0.00252134	-1.22468	0.48468	-2.52679	0.011511	0.0267559	389.723	166.756	221.179
CENPF	4016.47	1.54582	0.248604	6.218	5.03543e-10	5.65208e-09	1.71474	0.240371	7.13374	9.76799e-13	1.99733e-11	1305.13	4282.81	3809.63
CD3EAP	450.884	1.14661	0.178184	6.43501	1.23468e-10	1.55181e-09	1.19461	0.172352	6.93123	4.17201e-12	7.7597e-11	204.204	467.407	452.149
COLEC11	126.683	-1.20323	0.379311	-3.17215	0.00151315	0.00420712	-1.49754	0.366719	-4.0836	4.43431e-05	0.000198766	311.133	110.255	135.153
TREH	15.0087	-1.69048	0.500854	-3.37519	0.000737653	0.00223628	-1.40444	0.483747	-2.90325	0.00369309	0.00988938	39.1532	14.8081	12.1462
MMP8	6.05479	2.67445	0.724209	3.69293	0.000221689	0.000763338	3.01958	0.705957	4.27728	1.89191e-05	9.24138e-05	0.894116	6.79118	5.34985
APOA1	31.491	1.86988	0.593342	3.15144	0.00162467	0.00448144	1.59973	0.574285	2.78561	0.00534274	0.0137294	10.1077	58.9913	79.671
SLC8A2	86.3165	-2.22033	0.477068	-4.65411	3.25386e-06	1.7574e-05	-2.16653	0.461167	-4.69793	2.62812e-06	1.54976e-05	338.944	75.4253	72.6769
KPTN	770.613	1.05208	0.174291	6.03632	1.57665e-09	1.63766e-08	1.03974	0.168553	6.1686	6.88954e-10	8.49159e-09	382.855	787.458	794.197
KIF14	650.535	1.85448	0.267868	6.92311	4.41843e-12	6.99429e-11	2.01867	0.259059	7.79233	6.57871e-15	1.93384e-13	171.783	695.093	620.356
TNNT2	335.772	-3.16537	0.458316	-6.90652	4.96703e-12	7.79704e-11	-3.03546	0.443088	-6.8507	7.34874e-12	1.3143e-10	2111.06	257.47	235.28
NRP2	2216.97	-2.41803	0.348649	-6.93541	4.05046e-12	6.45532e-11	-1.4902	0.337079	-4.42093	9.8277e-06	5.08367e-05	6700.51	2385.05	1253.66
TTR	187.587	2.48945	0.978479	2.5442	0.0109528	0.0238751	3.18428	0.946186	3.36539	0.000764358	0.00248407	24.4895	1105.09	360.93
FILIP1	414.937	-4.92124	0.390281	-12.6095	1.87253e-36	1.30314e-33	-4.20151	0.377254	-11.1371	8.28049e-29	3.44398e-26	4630.72	251.699	152.78
FBXO30	849.589	-1.53481	0.157238	-9.76106	1.65412e-22	1.31143e-20	-1.50503	0.152007	-9.90107	4.11861e-23	6.54558e-21	2244.06	790.127	773.959
TNFAIP3	3296.14	-1.757	0.331331	-5.30285	1.14006e-07	8.34831e-07	-1.3748	0.320342	-4.29167	1.77332e-05	8.71413e-05	8579.24	3308.17	2538.26
MYB	385.88	1.55716	0.380901	4.0881	4.34914e-05	0.000179566	2.12241	0.368343	5.76204	8.31038e-09	8.27115e-08	102.446	446.469	301.722
SGK1	5295.43	-1.84725	0.348675	-5.29792	1.17128e-07	8.53702e-07	-1.54197	0.337113	-4.57405	4.78382e-06	2.66346e-05	15084.6	5180.32	4192.38
CTGF	9292.22	-3.88433	0.381514	-10.1814	2.4018e-24	2.54971e-22	-2.77268	0.368862	-7.51685	5.61116e-14	1.40624e-12	58298	8530.93	3947.73
TCF21	281.481	-4.51878	0.380517	-11.8754	1.58941e-32	5.85588e-30	-4.14592	0.367812	-11.2719	1.80691e-29	8.61498e-27	2985.66	168.685	130.259
SLC16A7	525.028	-1.52842	0.336804	-4.53802	5.67848e-06	2.89549e-05	-1.379	0.325621	-4.23498	2.28572e-05	0.000109728	1317.13	506.319	456.512
CASQ2	603.828	-6.02117	0.65491	-9.19388	3.78919e-20	2.11464e-18	-4.46132	0.633115	-7.04662	1.83312e-12	3.61958e-11	7702.86	349.69	118.586
PKD2	1121.62	-1.36684	0.181593	-7.52697	5.19316e-14	1.14262e-12	-1.10098	0.175556	-6.27139	3.57845e-10	4.68844e-09	2413.61	1124.91	935.466
SPP1	9927.13	3.13353	0.495972	6.31796	2.65037e-10	3.13013e-09	4.60779	0.479543	9.60873	7.34519e-22	8.91825e-20	715.248	21986.8	6171.22
STBD1	214.758	-1.03996	0.226203	-4.59748	4.27628e-06	2.24319e-05	-1.02757	0.218669	-4.69921	2.61173e-06	1.54149e-05	418.559	205.253	203.398
RARRES1	8191.22	1.6283	0.540399	3.01315	0.00258555	0.00674007	2.34824	0.522485	4.49436	6.97802e-06	3.73511e-05	1916.82	9760.7	8071.36
PPL	9108.28	-1.35303	0.309841	-4.36686	1.26045e-05	5.90772e-05	-1.35216	0.299567	-4.51369	6.37084e-06	3.4412e-05	21811.8	8543.75	8538.55
KLF12	501.274	-1.55147	0.312518	-4.96441	6.89109e-07	4.32621e-06	-1.23368	0.302133	-4.08323	4.44133e-05	0.000198944	1184.3	503.486	403.904
CCND2	2395.68	-1.99312	0.374969	-5.31542	1.06409e-07	7.84396e-07	-1.76797	0.362532	-4.87673	1.07858e-06	6.9424e-06	7519.59	2207.96	1888.83
ELL2	2598.19	-1.10739	0.244824	-4.52321	6.09096e-06	3.08738e-05	-1.02704	0.236704	-4.33892	1.43187e-05	7.15313e-05	5139.42	2521.98	2385.33
KLF9	1624.16	-3.27291	0.289208	-11.3168	1.08356e-29	2.53313e-27	-2.5147	0.2796	-8.99394	2.38533e-19	1.59686e-17	8597.43	1504.46	889.499
C2orf40	130.004	-5.48148	0.627661	-8.73319	2.47589e-18	1.03612e-16	-4.33971	0.606584	-7.15434	8.40765e-13	1.72821e-11	1564.1	77.2753	34.976
TRIM67	6.75843	1.89101	0.413492	4.57326	4.8019e-06	2.48904e-05	1.45261	0.404102	3.59466	0.000324818	0.0011728	1.90254	7.9975	12.9271
WDR34	4951.78	1.25173	0.22629	5.53151	3.17481e-08	2.59143e-07	1.40181	0.218793	6.407	1.48414e-10	2.08419e-09	1991.74	5262.77	4742.91
NR4A3	859.567	-4.20912	0.437953	-9.6109	7.19187e-22	5.11876e-20	-3.72683	0.423407	-8.80201	1.34388e-18	7.72655e-17	7804.28	589.524	421.963
ONECUT2	422.227	2.51734	0.585937	4.29626	1.73705e-05	7.87814e-05	2.40921	0.566593	4.2521	2.11778e-05	0.000102344	80.7457	429.339	462.766
PGF	1211.07	1.31281	0.345102	3.80413	0.000142303	0.000515396	1.4708	0.333678	4.40784	1.04405e-05	5.37221e-05	464.838	1288.56	1154.86
ACYP1	481.556	1.27229	0.170041	7.48223	7.30728e-14	1.56382e-12	1.22399	0.164488	7.44123	9.97484e-14	2.39543e-12	208.838	488.006	504.653
PPP4R4	63.8669	2.81389	0.664393	4.23527	2.28278e-05	0.000100878	2.99341	0.643035	4.65512	3.23786e-06	1.86983e-05	8.68091	69.3352	61.1804
TGFB3	1146.08	-2.25574	0.33286	-6.77685	1.22822e-11	1.81719e-10	-1.1746	0.3218	-3.6501	0.000262135	0.000969211	2909.6	1288.93	609.152
CNRIP1	337.168	-2.32643	0.318589	-7.30229	2.82902e-13	5.50852e-12	-1.69373	0.307965	-5.49976	3.80305e-08	3.29677e-07	1106.52	342.1	220.748
EPCAM	7064.17	1.53101	0.324056	4.72451	2.30676e-06	1.29361e-05	1.72658	0.313317	5.51066	3.57482e-08	3.12106e-07	2293.77	7591.69	6629.26
ELOVL3	42.3209	1.8161	0.453557	4.00411	6.22506e-05	0.000248289	2.17752	0.439181	4.95815	7.11678e-07	4.73999e-06	10.4424	47.4123	36.8818
IFIT3	2667.62	1.95292	0.395947	4.93226	8.12839e-07	5.02079e-06	1.66518	0.382832	4.34965	1.36353e-05	6.84319e-05	813.317	2579.57	3148.9
IFIT2	989.376	1.44579	0.39386	3.67083	0.000241768	0.000825218	1.42278	0.380823	3.73605	0.00018693	0.000717478	378.905	1015.65	1031.96
CNNM1	67.0753	-2.54712	0.506722	-5.02666	4.99107e-07	3.22386e-06	-2.04677	0.489741	-4.17929	2.92418e-05	0.00013698	265.527	64.1883	45.3953
HELLS	1131.92	1.5818	0.185058	8.5476	1.2567e-17	4.68518e-16	1.59779	0.178967	8.92781	4.3454e-19	2.7669e-17	385.596	1167.64	1154.78
PRLHR	0.756007	-4.28	0.703287	-6.08571	1.15979e-09	1.2347e-08	-3.36913	0.668174	-5.0423	4.59978e-07	3.17951e-06	6.30757	0.608078	2.23597
C10orf95	50.1339	1.53924	0.283087	5.43736	5.40765e-08	4.23904e-07	1.09422	0.274306	3.98904	6.63421e-05	0.000285714	21.3937	45.9451	62.5714
SFRP5	18.5314	-3.9655	0.768424	-5.16057	2.46199e-07	1.69143e-06	-2.64313	0.741865	-3.56282	0.000366899	0.00130521	110.669	17.7392	7.08232
HOXB5	439.757	2.57974	0.42177	6.11647	9.56716e-10	1.03136e-08	1.59692	0.407881	3.91517	9.03415e-05	0.000375424	114.151	345.842	683.505
DUSP1	13271.9	-3.46092	0.336378	-10.2888	7.91576e-25	9.01437e-23	-2.95042	0.325223	-9.07197	1.16881e-19	8.36917e-18	85228.1	11026.1	7740.05
TEK	273.468	-1.74986	0.289626	-6.04182	1.5239e-09	1.5899e-08	-1.33528	0.279967	-4.76942	1.84753e-06	1.12474e-05	699.064	277.048	207.875
MTHFD1L	1811.6	1.38366	0.211628	6.53818	6.22712e-11	8.28079e-10	1.54608	0.204632	7.55542	4.17518e-14	1.06549e-12	663.411	1937.48	1731.11
MYCT1	259.169	-1.81576	0.270256	-6.71868	1.83375e-11	2.65223e-10	-1.57437	0.261242	-6.02649	1.67558e-09	1.91995e-08	744.086	249.923	211.444
PCDHB8	94.6295	1.54072	0.485375	3.17429	0.00150204	0.00418123	1.58645	0.46948	3.37916	0.000727066	0.00237511	32.9796	98.9337	95.8822
CENPL	420.649	1.04571	0.178268	5.86594	4.46599e-09	4.24247e-08	1.22066	0.172429	7.07917	1.45023e-12	2.90761e-11	192.834	447.976	396.879
TTLL2	1.63138	-2.45211	0.65896	-3.72118	0.000198294	0.000693071	-1.85579	0.63121	-2.94006	0.00328151	0.00893537	5.93823	1.61627	1.06752
ENOX1	150.752	-1.61882	0.369784	-4.37774	1.19914e-05	5.65396e-05	-1.2552	0.357452	-3.51152	0.000445552	0.00154728	363.183	152.087	118.174
SMAD9	329.585	-1.19194	0.348415	-3.42105	0.000623805	0.0019288	-2.00382	0.336873	-5.9483	2.70934e-09	2.97207e-08	967.818	241.22	423.372
MYOT	27.714	-2.98175	0.370984	-8.03741	9.17582e-16	2.66071e-14	-2.68055	0.358131	-7.48482	7.16466e-14	1.76614e-12	150.663	23.4693	19.0461
EGR1	13499	-3.68963	0.336084	-10.9783	4.85959e-28	9.71401e-26	-3.31088	0.32494	-10.1892	2.21541e-24	4.6071e-22	101239	10201.7	7846.17
DUSP4	3031.53	-1.51216	0.332369	-4.54964	5.37383e-06	2.75649e-05	-1.69404	0.321347	-5.27168	1.35177e-07	1.0433e-06	8614.59	2662.53	3020.28
CLU	23490	-1.72982	0.442797	-3.90657	9.36159e-05	0.00035637	-1.7554	0.428116	-4.10029	4.12637e-05	0.000186223	71366.2	21138	21516.2
ADRA1A	4.2555	-2.98497	0.634815	-4.7021	2.57494e-06	1.42513e-05	-2.61155	0.611535	-4.27049	1.95046e-05	9.50512e-05	22.6633	7.4968	5.95701
EPHX2	557.716	-1.71465	0.347962	-4.9277	8.32011e-07	5.1291e-06	-1.66995	0.336411	-4.96401	6.90539e-07	4.60666e-06	1620.53	509.282	493.777
SPOP	2680.54	-1.16013	0.123505	-9.39338	5.81044e-21	3.55629e-19	-1.07989	0.119403	-9.04408	1.50927e-19	1.06127e-17	5490.09	2596.48	2455.97
TBX4	163.994	-4.06707	0.499868	-8.13627	4.07636e-16	1.24342e-14	-2.74232	0.483103	-5.67648	1.37497e-08	1.3169e-07	1031.31	154.124	61.5107
FAM117A	725.114	-1.1417	0.199878	-5.71201	1.11652e-08	9.88455e-08	-1.00851	0.193235	-5.21909	1.79808e-07	1.35867e-06	1435.45	713.278	650.336
NCAPH	1101.46	2.08179	0.241934	8.60479	7.64541e-18	2.93777e-16	2.18953	0.233969	9.35819	8.11137e-21	7.84956e-19	256.069	1167.7	1083.68
LRAT	74.6929	1.93722	0.689063	2.81139	0.00493286	0.0118482	2.05407	0.666477	3.08198	0.00205626	0.00594347	19.1399	128.514	73.3722
MND1	244.498	1.26528	0.234241	5.40161	6.60447e-08	5.07143e-07	1.34159	0.226595	5.92065	3.20663e-09	3.46316e-08	101.268	255.925	242.79
TSHZ3	545.049	-2.67428	0.347358	-7.69891	1.37234e-14	3.30169e-13	-1.90697	0.3358	-5.6789	1.35563e-08	1.30028e-07	2061.52	549.607	322.928
KCNJ8	323.443	-2.38758	0.331914	-7.19336	6.32137e-13	1.15995e-11	-1.55398	0.320836	-4.84355	1.27543e-06	8.07773e-06	1001.74	341.124	191.377
PDZRN3	701.068	-3.85018	0.391804	-9.82681	8.63076e-23	7.27229e-21	-2.7922	0.378768	-7.37181	1.68323e-13	3.86648e-12	4420.55	638.15	306.471
LHX4	84.5386	1.01757	0.331007	3.07416	0.00211093	0.00563959	1.21757	0.320217	3.80232	0.000143347	0.00056632	38.7639	90.4347	78.7392
CSTA	4314.35	-2.04228	0.452912	-4.50921	6.50685e-06	3.27873e-05	-2.31777	0.437895	-5.29299	1.20331e-07	9.40518e-07	17353.3	3480.66	4212.99
POPDC2	406.275	-4.7195	0.389402	-12.1199	8.29079e-34	3.38661e-31	-3.88422	0.376403	-10.3193	5.76311e-25	1.37387e-22	4073.3	275.896	154.58
CD80	47.6176	1.00508	0.435679	2.30693	0.0210588	0.042055	1.15606	0.42148	2.74287	0.00609057	0.015377	22.6573	50.5482	45.5508
KIF18A	426.202	1.99232	0.253515	7.85878	3.87894e-15	1.01937e-13	2.11291	0.245241	8.61567	6.95345e-18	3.53055e-16	104.743	452.754	416.447
CRY2	1299.67	-1.79582	0.143018	-12.5566	3.6569e-36	2.36942e-33	-1.65737	0.138258	-11.9875	4.13082e-33	3.67042e-30	3843.5	1218.46	1106.78
PILRB	387.429	1.85556	0.314086	5.90779	3.46718e-09	3.35125e-08	1.70448	0.303769	5.6111	2.01044e-08	1.85904e-07	118.569	386.63	429.258
GJA3	72.2264	1.73817	0.54932	3.16423	0.00155496	0.00430494	2.15896	0.531414	4.06267	4.85139e-05	0.000215045	18.098	80.7991	60.3556
SLITRK3	31.9738	-2.46417	0.80841	-3.04817	0.00230238	0.00608463	-2.25657	0.781435	-2.88772	0.00388041	0.0103429	136.252	28.5115	24.6356
CPXM2	1031.78	-3.91115	0.435482	-8.98119	2.67856e-19	1.33148e-17	-2.63541	0.421011	-6.25972	3.85671e-10	5.03277e-09	6128.51	986.352	407.345
CXCR4	2157.56	-1.71606	0.327939	-5.23288	1.66891e-07	1.18604e-06	-1.22215	0.317059	-3.85463	0.000115904	0.000468216	5211.65	2234.03	1586.4
FLT3	25.9182	-1.68529	0.426319	-3.95311	7.71423e-05	0.000300602	-1.5176	0.411891	-3.68447	0.000229181	0.000860386	70.8224	24.8002	22.0387
RASL11A	374.414	-2.08421	0.349132	-5.96968	2.3772e-09	2.38354e-08	-2.29582	0.337541	-6.80161	1.03455e-11	1.79285e-10	1508.23	307.113	355.645
XPNPEP2	99.5831	-4.95607	0.616089	-8.04441	8.66634e-16	2.52075e-14	-3.32416	0.59528	-5.58418	2.34801e-08	2.13682e-07	839.859	83.9134	27.0254
PAEP	21.2765	4.44834	0.86556	5.13926	2.7582e-07	1.87574e-06	5.75393	0.844079	6.81681	9.30861e-12	1.62987e-10	0.466137	80.8786	20.5856
LDB3	129.305	-3.29303	0.397946	-8.27506	1.28395e-16	4.20302e-15	-2.66619	0.384594	-6.93247	4.13547e-12	7.69907e-11	729.497	114.869	74.3635
PTGFR	154.808	-4.09537	0.493737	-8.29463	1.08922e-16	3.59692e-15	-3.29756	0.477218	-6.90996	4.84794e-12	8.9235e-11	1210.73	123.131	70.8001
CCDC18	359.187	1.10511	0.181983	6.0726	1.25858e-09	1.32933e-08	1.15308	0.176038	6.5502	5.74614e-11	8.72092e-10	167.275	371.828	359.771
WIPF3	201.008	-1.72725	0.396074	-4.36094	1.29507e-05	6.05634e-05	-1.13792	0.382876	-2.97204	0.00295828	0.00815289	468.106	212.594	141.251
NXPH1	6.11773	4.29187	0.850057	5.04892	4.44313e-07	2.89883e-06	3.87269	0.829986	4.66597	3.07165e-06	1.7828e-05	0.27248	10.2764	9.32081
INHBA	1947.53	1.62182	0.429366	3.77724	0.000158578	0.000568533	2.64297	0.415146	6.36636	1.93563e-10	2.65528e-09	389.137	2429.66	1197.13
GLIPR2	1048.34	-1.68308	0.326996	-5.14711	2.64532e-07	1.80682e-06	-1.22763	0.316141	-3.88317	0.000103102	0.000422522	2524.65	1078.03	786.161
RECK	330.186	-2.45436	0.281907	-8.70628	3.14007e-18	1.28825e-16	-1.92532	0.272495	-7.06553	1.60002e-12	3.19155e-11	1223.02	322	223.045
DNAI1	5.46167	1.63206	0.59913	2.72406	0.00644856	0.015024	2.09475	0.582456	3.5964	0.000322651	0.00116562	1.44893	7.18483	9.75942
TRIM24	3838.9	1.05557	0.257252	4.10326	4.07361e-05	0.000169456	1.04712	0.248729	4.20988	2.55509e-05	0.000121231	1855.25	3833.84	3856.34
CALD1	13741.2	-3.8721	0.323387	-11.9736	4.88693e-33	1.83651e-30	-2.95608	0.312663	-9.45454	3.24457e-21	3.42837e-19	92627.7	11936.3	6325.81
NUDT10	32.1832	-1.9547	0.548188	-3.56575	0.00036281	0.00118746	-1.82241	0.529818	-3.43969	0.000582387	0.00195208	105.485	29.7711	27.1166
PLAU	9856.46	1.68287	0.356317	4.72294	2.32459e-06	1.30268e-05	2.29677	0.344507	6.66682	2.61398e-11	4.237e-10	2349.74	11545.9	7544.41
EGR2	546.782	-2.6242	0.37974	-6.91053	4.82842e-12	7.58579e-11	-2.21788	0.367122	-6.04127	1.52909e-09	1.76451e-08	2348.7	504.866	380.985
ZWINT	2371.84	2.14239	0.217431	9.8532	6.63952e-23	5.69665e-21	2.22848	0.210253	10.599	3.01036e-26	8.52848e-24	533.198	2497.83	2353.13
CIT	1411.6	1.45311	0.216027	6.72651	1.73779e-11	2.51952e-10	1.54633	0.208892	7.40251	1.33639e-13	3.12858e-12	505.306	1475.26	1382.95
RASSF8	775.722	-1.92874	0.280214	-6.88309	5.85688e-12	9.11016e-11	-1.32088	0.270897	-4.87596	1.08282e-06	6.9674e-06	2025.75	810.771	531.962
SSPN	1005.58	-2.22865	0.253498	-8.79159	1.47453e-18	6.42841e-17	-1.8709	0.245074	-7.63403	2.27525e-14	6.12624e-13	3513.95	960.648	749.697
NECAB1	166.259	-3.75265	0.411103	-9.12825	6.9614e-20	3.71754e-18	-3.01848	0.397327	-7.59697	3.03139e-14	7.92213e-13	1133.35	139.857	83.9869
DDX39A	4893.22	1.13924	0.149664	7.61198	2.69937e-14	6.20064e-13	1.04849	0.14471	7.24548	4.309e-13	9.29716e-12	2372.88	4908.41	5227.03
CENPK	473.229	2.00137	0.230465	8.68407	3.81849e-18	1.54632e-16	1.91779	0.222947	8.60198	7.83527e-18	3.95772e-16	127.084	479.929	508.583
ITIH5	1516.76	-3.78675	0.378228	-10.0118	1.3521e-23	1.28313e-21	-3.47855	0.365675	-9.51269	1.85796e-21	2.1116e-19	12176.1	1092.41	882.223
NCKAP1L	1114.52	-1.91345	0.402599	-4.75274	2.00677e-06	1.13988e-05	-1.57776	0.389241	-4.05342	5.04739e-05	0.000222874	3261.9	1092.69	865.858
NR4A1	6505.47	-4.0892	0.3835	-10.6628	1.51872e-26	2.26482e-24	-3.69245	0.370782	-9.95856	2.31398e-23	3.93337e-21	57837.2	4473.76	3398.17
HOXC13	222.139	3.07348	0.494925	6.20999	5.29894e-10	5.91956e-09	2.51036	0.478767	5.24338	1.57658e-07	1.20199e-06	34.3967	196.288	290.043
HOXC11	113.204	2.60041	0.562293	4.62465	3.75225e-06	1.99844e-05	2.2549	0.543969	4.14527	3.39414e-05	0.000156335	22.5765	107.94	137.163
HOXC12	13.9014	2.556	1.0111	2.52793	0.0114736	0.0248489	2.88316	0.979316	2.94405	0.00323945	0.00883562	2.09804	29.9057	35.0303
IKZF4	452.08	-1.40032	0.171987	-8.14204	3.88671e-16	1.19138e-14	-1.4878	0.166261	-8.94856	3.6014e-19	2.34667e-17	1148.23	409.589	435.062
SMUG1	1969.33	1.191	0.148454	8.02263	1.03504e-15	2.96469e-14	1.05493	0.143554	7.34862	2.00264e-13	4.5101e-12	939.431	1951.78	2144.95
DBH	16.366	-1.01086	0.448322	-2.25476	0.0241482	0.0473391	-1.02785	0.433256	-2.37238	0.0176741	0.0388369	31.645	52.6134	19.7662
STIL	783.957	2.12964	0.216039	9.85768	6.34998e-23	5.47322e-21	2.18048	0.208968	10.4345	1.72485e-25	4.68297e-23	180.762	819.111	790.768
HJURP	1140.57	2.51825	0.231904	10.859	1.80673e-27	3.03111e-25	2.46454	0.224294	10.988	4.36535e-28	1.55152e-25	211.703	1167.42	1211.72
COL10A1	1163.76	5.16279	0.57781	8.93511	4.06766e-19	1.97497e-17	7.24027	0.55934	12.9443	2.53025e-38	6.18266e-35	10.7806	1627.1	385.475
PLP1	81.9371	-4.8589	0.590538	-8.22792	1.90488e-16	6.09962e-15	-4.11355	0.57067	-7.20828	5.66629e-13	1.19616e-11	887.786	51.3408	30.5799
H2BFWT	10.8274	2.18812	0.790383	2.76843	0.00563274	0.0133181	2.37306	0.766145	3.0974	0.00195224	0.00567807	2.23669	11.6903	10.307
RAB9B	148.881	-3.87193	0.357185	-10.8401	2.22186e-27	3.67808e-25	-3.50854	0.345197	-10.1639	2.87434e-24	5.73342e-22	1220.09	107.15	83.2107
ESX1	5.31053	3.9742	1.0589	3.75312	0.000174644	0.000619513	4.38386	1.02978	4.25709	2.07106e-05	0.000100366	0.145173	12.0949	8.39597
MAGEA9	20.7194	5.47373	1.4103	3.88126	0.000103915	0.00039059	6.81698	1.36836	4.98188	6.29708e-07	4.23153e-06	10.7433	27.1242	17.167
TNFAIP6	295.01	-2.57277	0.430795	-5.97215	2.3415e-09	2.349e-08	-1.44807	0.416431	-3.47734	0.000506419	0.00172736	889.28	325.972	149.467
CKS2	2099.11	1.73869	0.215016	8.08633	6.14872e-16	1.81944e-14	1.80071	0.207912	8.66093	4.67926e-18	2.47887e-16	631.14	2198.77	2106.37
DAW1	6.48932	2.66488	0.866843	3.07424	0.00211038	0.00563909	3.03873	0.842714	3.60588	0.000311097	0.00112763	0.898314	14.9982	5.63265
INHA	61.3134	1.36683	0.428398	3.19056	0.00141999	0.0039752	2.03029	0.414518	4.89796	9.68362e-07	6.31405e-06	17.6362	105.335	45.4442
PI3	5256.14	3.23749	0.769881	4.20518	2.60871e-05	0.000113467	3.41974	0.744366	4.59417	4.34479e-06	2.44127e-05	6607.93	13446.8	12606.3
KCNS1	123.554	2.20261	0.493457	4.46363	8.05843e-06	3.9576e-05	2.50018	0.477389	5.23719	1.63036e-07	1.24009e-06	24.1202	137.004	140.536
SLC12A5	50.5217	1.32393	0.375353	3.52715	0.000420054	0.00135359	1.45356	0.363295	4.00104	6.30642e-05	0.000273222	19.5485	53.6632	49.0571
ARHGAP40	840.069	1.62072	0.453359	3.57491	0.000350347	0.00115188	1.65276	0.438354	3.77037	0.000163006	0.00063551	277.532	872.927	853.766
SEMG2	6.48119	2.50896	0.973669	2.57681	0.00997163	0.0219823	2.8246	0.945015	2.98895	0.00279942	0.00776874	3.46293	31.8544	48.5331
ZNF831	51.8716	-1.46606	0.443397	-3.30643	0.00094494	0.00278516	-1.34097	0.428577	-3.1289	0.00175465	0.0051672	126.429	49.9281	45.766
PTGIS	2404.73	-4.79451	0.53261	-9.00193	2.21788e-19	1.10835e-17	-3.02825	0.514932	-5.88088	4.08098e-09	4.33559e-08	17897.7	2193.89	644.886
CDH26	838.593	1.92458	0.472769	4.07086	4.68399e-05	0.000192166	1.27684	0.457123	2.7932	0.0052189	0.0134448	300.914	729.394	1142.72
MAGEA10	479.843	4.90174	0.930681	5.26683	1.38798e-07	9.9809e-07	5.29585	0.900159	5.88324	4.02308e-09	4.28107e-08	96.0256	545.852	415.355
HIF3A	255.198	-3.62588	0.557757	-6.50082	7.9881e-11	1.03945e-09	-2.9873	0.539202	-5.54022	3.02091e-08	2.6757e-07	1693.13	213.49	137.104
F13A1	1575.78	-2.53216	0.466262	-5.43077	5.61124e-08	4.37128e-07	-1.35854	0.450789	-3.01369	0.00258089	0.00724666	4523.71	1764.12	782.03
GRM4	34.459	2.43639	0.5774	4.21959	2.44748e-05	0.000107187	2.81278	0.55938	5.02838	4.9463e-07	3.40339e-06	5.44573	57.56	46.1083
PACSIN1	191.049	1.60002	0.428701	3.73226	0.000189768	0.000666368	1.39292	0.414601	3.35966	0.000780379	0.00253024	71.2663	187.607	216.526
HIST1H1D	19.4268	2.61513	0.439784	5.94638	2.74129e-09	2.70104e-08	3.29951	0.428579	7.69872	1.37441e-14	3.83257e-13	2.34642	30.4785	14.3142
UNC5CL	123.342	1.78005	0.355727	5.00397	5.61622e-07	3.59308e-06	1.15189	0.344168	3.34688	0.000817278	0.00263744	48.3522	107.69	166.42
HIST1H2BJ	228.513	2.83474	0.377125	7.5167	5.6177e-14	1.22455e-12	3.04488	0.364963	8.34301	7.24258e-17	3.0373e-15	30.1904	248.67	214.998
OR2B6	20.7458	4.35233	0.552861	7.87238	3.47962e-15	9.19579e-14	3.98228	0.540525	7.36742	1.7396e-13	3.99127e-12	1.27074	22.9208	25.619
APOBEC2	9.05532	-1.62255	0.497854	-3.25909	0.00111769	0.00322851	-1.66888	0.480843	-3.47074	0.000519034	0.00176117	25.8774	8.20915	8.33496
TREM1	347.793	1.49066	0.499888	2.98199	0.00286379	0.00736124	1.73108	0.483366	3.5813	0.000341895	0.00122406	113.98	378.217	320.229
COL21A1	188.064	-2.74487	0.441455	-6.21777	5.04261e-10	5.65675e-09	-2.60136	0.426764	-6.09555	1.09061e-09	1.29679e-08	957.23	157.754	142.757
CDKN1A	13001.3	-1.52304	0.258508	-5.89167	3.82301e-09	3.66689e-08	-1.57991	0.249936	-6.32125	2.59449e-10	3.49773e-09	35366.8	11830.4	12306
SOX4	11062.1	1.70744	0.25581	6.67464	2.47839e-11	3.5067e-10	1.6745	0.247333	6.77024	1.28569e-11	2.19308e-10	3542.96	11310.2	11571.5
ATXN1	1278.06	-1.53542	0.244528	-6.27912	3.40493e-10	3.95174e-09	-1.31595	0.23641	-5.5664	2.60061e-08	2.33732e-07	3105.27	1247.1	1071.02
LRRFIP1	6640.91	-1.20202	0.14884	-8.07593	6.69638e-16	1.97218e-14	-1.17779	0.143903	-8.18463	2.73149e-16	1.03079e-14	14290.8	6316.72	6211.49
RAB17	647.423	1.52099	0.332182	4.57879	4.67674e-06	2.43222e-05	1.30493	0.321209	4.06256	4.85365e-05	0.000215097	256.164	633.558	735.929
EREG	936.119	1.66543	0.670053	2.48551	0.0129364	0.0275738	1.59398	0.647854	2.46039	0.0138784	0.0314765	2071.1	1324.05	1158.78
MYRF	454.278	1.21957	0.407859	2.99017	0.0027882	0.00719449	1.05845	0.394371	2.6839	0.0072768	0.0180151	215.677	448.952	501.983
AHNAK	38524.4	-1.91273	0.244312	-7.82901	4.91707e-15	1.27213e-13	-1.53197	0.236212	-6.48556	8.84052e-11	1.30033e-09	110171	38097.6	29260.1
MT1G	217.095	1.22523	0.464901	2.63547	0.00840201	0.0189729	2.18199	0.449562	4.85358	1.21251e-06	7.71523e-06	160.758	267.625	377.346
ABCC4	1299.89	-1.03003	0.291054	-3.53898	0.000401678	0.00130107	-1.53457	0.281405	-5.45326	4.94541e-08	4.15976e-07	3089.4	1066.47	1512.92
C17orf53	484.274	1.70095	0.203078	8.37587	5.48194e-17	1.87283e-15	1.89192	0.196456	9.63024	5.95928e-22	7.51561e-20	140.582	521.392	456.693
KIF25	7.43442	-1.0461	0.464856	-2.25037	0.0244255	0.0478278	-1.05177	0.448983	-2.34256	0.0191522	0.0415431	14.564	14.3285	14.792
TMEM255A	56.5661	-2.26867	0.463004	-4.89989	9.58902e-07	5.83477e-06	-1.65838	0.447412	-3.70661	0.000210056	0.000796546	181.476	57.4419	37.551
SOX9	2053.58	1.21784	0.421119	2.89191	0.00382911	0.00949696	1.5606	0.407165	3.83285	0.000126668	0.000506569	772.406	2278.53	1796.7
MYH2	11.5313	-7.11145	0.789639	-9.00595	2.13816e-19	1.07422e-17	-4.77149	0.756062	-6.31098	2.77267e-10	3.71234e-09	164.053	6.0314	1.16871
PPP1R12C	4766.41	-1.0588	0.152018	-6.96499	3.28428e-12	5.33376e-11	-1.0748	0.146976	-7.31274	2.61752e-13	5.82109e-12	9544.81	4530.87	4581.24
MBOAT7	11350.2	1.2278	0.196332	6.25369	4.00863e-10	4.57886e-09	1.10562	0.189825	5.82443	5.73089e-09	5.87146e-08	5247.35	11292.6	12290.6
IL37	8.79007	4.64932	0.644612	7.21259	5.48962e-13	1.02028e-11	4.43458	0.633876	6.99598	2.63417e-12	5.07817e-11	0.348799	33.2818	12.4104
PAX8	581.275	3.15039	0.433911	7.26045	3.85817e-13	7.32258e-12	1.48666	0.419617	3.5429	0.000395746	0.00139263	284.987	441.41	1121.79
SLC25A23	1912.56	-2.20464	0.255057	-8.64373	5.44079e-18	2.14263e-16	-2.20599	0.246594	-8.94582	3.69184e-19	2.39761e-17	7624.87	1652.49	1654.02
C3	17432.8	-1.74105	0.45152	-3.85597	0.000115272	0.00042831	-1.5389	0.436549	-3.52514	0.000423256	0.0014772	48667.7	16748.9	14559.1
FOSB	9351.6	-3.88124	0.463075	-8.38145	5.22796e-17	1.79258e-15	-3.71977	0.44772	-8.30825	9.71207e-17	3.9635e-15	81614.8	6194.53	5538.62
GNRH2	12.2936	1.36962	0.386493	3.54372	0.000394519	0.00128053	1.00564	0.375218	2.68016	0.00735861	0.0182015	5.67692	11.5487	14.8797
DEFB126	24.7093	3.47754	0.72611	4.78928	1.67383e-06	9.66247e-06	3.75932	0.704781	5.33403	9.60587e-08	7.65806e-07	1.98065	27.3019	22.4456
FOXA2	24.2441	3.95597	0.970336	4.07691	4.56389e-05	0.000187608	4.34433	0.941817	4.61271	3.97454e-06	2.25136e-05	1.12778	69.7365	30.4858
CD93	2649.59	-1.49991	0.275814	-5.43811	5.38485e-08	4.22469e-07	-1.10534	0.266664	-4.14508	3.397e-05	0.00015643	5850.44	2719.32	2068.65
NKX2-2	5.25614	3.72348	1.20722	3.08433	0.00204011	0.00547154	4.44774	1.17216	3.7945	0.000147944	0.000581892	0.124542	17.7895	11.2677
CSTL1	8.43815	2.54457	0.588541	4.32352	1.5356e-05	7.05474e-05	3.0206	0.57399	5.26245	1.42148e-07	1.09312e-06	1.16359	9.68331	6.97815
TMX4	2319.78	-1.39801	0.176466	-7.92223	2.33286e-15	6.32531e-14	-1.23928	0.170609	-7.2639	3.76085e-13	8.16857e-12	5332.71	2258.49	2023.18
SNRPB	13600.6	1.11809	0.155423	7.19389	6.29728e-13	1.15666e-11	1.11459	0.150273	7.41713	1.19688e-13	2.83251e-12	6434.87	13934.2	13968.1
PCSK2	53.2557	-3.4783	0.897082	-3.87735	0.0001056	0.000396291	-2.6329	0.867129	-3.03634	0.00239465	0.00677924	303.358	48.8586	27.1904
DSTN	20338.6	-2.1577	0.163106	-13.2288	5.98155e-40	6.31485e-37	-1.92379	0.157697	-12.1992	3.13714e-34	3.60734e-31	71676	18890.9	16063.3
MGME1	1531.31	1.12196	0.133787	8.38615	5.02311e-17	1.72865e-15	1.14751	0.12938	8.86928	7.3621e-19	4.53989e-17	712.654	1579.47	1551.76
LRRN4	18.382	2.24357	0.534782	4.19529	2.72521e-05	0.000117686	3.34086	0.519602	6.42967	1.27885e-10	1.83142e-09	2.28846	29.2517	13.6522
TCF15	89.2802	1.35861	0.47032	2.88869	0.00386848	0.00958574	1.63429	0.454913	3.59253	0.000327483	0.00118111	31.4583	97.7013	80.6988
TMEM74B	342.746	2.92328	0.379902	7.69482	1.4169e-14	3.39587e-13	2.84726	0.367524	7.74713	9.39909e-15	2.69404e-13	48.4948	349.473	368.38
FAM110A	2234.36	1.35998	0.184706	7.36292	1.79927e-13	3.59663e-12	1.21362	0.1786	6.79516	1.08195e-11	1.87168e-10	954.654	2215.5	2452
MRPS26	3560.33	1.13217	0.161794	6.99761	2.60374e-12	4.27659e-11	1.00644	0.15644	6.43337	1.24805e-10	1.79389e-09	1761.33	3538.53	3860.73
S1PR4	160.285	-1.04479	0.365743	-2.85663	0.00428168	0.0104579	-1.2636	0.353603	-3.57351	0.000352222	0.00125689	346.368	144.33	168.066
BPIFB1	473.292	2.34064	0.775115	3.01973	0.00253002	0.00661492	2.09811	0.749463	2.79949	0.00511834	0.0132263	5251.19	1323.48	925.918
ST3GAL3	497.164	-1.26919	0.178824	-7.09743	1.27099e-12	2.187e-11	-1.10115	0.172866	-6.36996	1.8908e-10	2.60291e-09	1050.16	489.39	435.515
XRCC3	1019.49	1.23699	0.16937	7.30348	2.80408e-13	5.47131e-12	1.11779	0.163793	6.82439	8.8297e-12	1.55358e-10	467.861	1015.87	1103.3
F10	104.679	-4.30994	0.379472	-11.3577	6.78756e-30	1.67814e-27	-3.40243	0.366564	-9.28195	1.6641e-20	1.45874e-18	865.475	82.0252	43.6638
PROZ	13.1172	1.62991	0.394242	4.13428	3.56067e-05	0.000149709	1.53516	0.382993	4.00831	6.1154e-05	0.000265594	4.57861	13.2278	14.1027
SLURP1	29.3975	4.51659	0.622633	7.25401	4.04606e-13	7.65613e-12	3.14921	0.605154	5.20398	1.95067e-07	1.46267e-06	1225.04	26.2695	330.153
THRA	1453.58	-1.85297	0.211758	-8.75043	2.12537e-18	8.99453e-17	-1.61785	0.204725	-7.90255	2.73257e-15	8.54661e-14	4274.53	1392.56	1183.04
BCL2L12	1396.04	1.2947	0.167714	7.71968	1.16624e-14	2.84224e-13	1.40033	0.162184	8.63419	5.91433e-18	3.05855e-16	556.716	1469.71	1365.91
RRAS	2326.54	-1.25902	0.256802	-4.9027	9.45298e-07	5.76693e-06	-1.00709	0.248283	-4.05622	4.9874e-05	0.000220424	4714.04	2345.35	1969.57
SBDS	3368.86	-1.30136	0.127477	-10.2086	1.81498e-24	1.95997e-22	-1.13521	0.123244	-9.21109	3.22822e-20	2.70838e-18	7264.47	3306.85	2947.02
WNK4	110.626	1.3907	0.456931	3.04356	0.00233798	0.00617091	1.64753	0.441942	3.72794	0.000193054	0.000737218	112.091	120.291	100.626
IFI6	14617	2.67433	0.417651	6.40326	1.52089e-10	1.88382e-09	2.61206	0.403808	6.46857	9.89378e-11	1.44384e-09	2454.83	15008.6	15670.6
SSX1	22.5849	6.01989	1.36376	4.41418	1.01392e-05	4.86754e-05	9.39039	1.32228	7.10166	1.23264e-12	2.49696e-11	0.0392666	89.1999	21.3172
CFP	145.378	-1.71164	0.412793	-4.14649	3.3761e-05	0.000142683	-1.87279	0.399075	-4.69283	2.69449e-06	1.58602e-05	461.917	126.288	141.118
SIX1	528.446	2.02163	0.316569	6.38604	1.70233e-10	2.08383e-09	1.84669	0.306154	6.0319	1.62044e-09	1.86551e-08	146.159	526.27	594.007
RHOJ	442.726	-2.3342	0.288831	-8.08157	6.394e-16	1.88608e-14	-1.73448	0.279205	-6.2122	5.22475e-10	6.62344e-09	1480.55	445.079	293.64
DLGAP5	1236.33	2.00056	0.26191	7.63834	2.20033e-14	5.14231e-13	2.03223	0.253269	8.02398	1.02372e-15	3.55447e-14	314.866	1287.48	1259.54
HSPA2	1254.38	-2.02886	0.338839	-5.98769	2.1284e-09	2.1571e-08	-2.06319	0.327598	-6.29791	3.01676e-10	4.01168e-09	4571.1	1093.85	1119.95
CTAG2	361.641	7.38061	1.2705	5.8092	6.27733e-09	5.819e-08	8.66602	1.23138	7.03766	1.95494e-12	3.82917e-11	52.4626	470.295	193.008
AVPR2	38.5492	-1.63362	0.378836	-4.31219	1.61642e-05	7.37735e-05	-1.74425	0.366138	-4.7639	1.89887e-06	1.15313e-05	114.734	34.2554	37.0001
ARMCX1	469.826	-1.86287	0.33645	-5.53684	3.0797e-08	2.51927e-07	-1.81584	0.325276	-5.58247	2.37131e-08	2.15501e-07	1506.24	427.803	413.998
TMEM35A	163.946	-3.17685	0.564524	-5.62749	1.82849e-08	1.55675e-07	-3.37243	0.545771	-6.17919	6.44297e-10	7.99664e-09	1165.85	112.566	128.866
RGS13	24.3522	-2.61163	0.474198	-5.50746	3.64043e-08	2.93956e-07	-1.67739	0.457702	-3.6648	0.00024753	0.000921659	82.1421	42.4558	13.4465
OMD	80.2671	-4.79928	0.607027	-7.90621	2.65343e-15	7.14297e-14	-2.66883	0.586299	-4.552	5.31383e-06	2.92852e-05	512.839	80.6603	18.3928
MASP1	109.769	-3.77258	0.471089	-8.00821	1.16389e-15	3.29858e-14	-2.65063	0.455219	-5.82276	5.78852e-09	5.9274e-08	648.18	103.13	47.4311
ATP13A4	49.4474	-1.27212	0.52761	-2.4111	0.0159045	0.0329889	-1.4588	0.510069	-2.86001	0.00423631	0.0111681	287.545	55.6797	66.6092
BEST3	8.01482	2.63694	0.785661	3.35633	0.000789841	0.00237306	3.36055	0.764518	4.39565	1.10442e-05	5.64869e-05	0.835587	44.3824	29.0577
RAB3IP	1783.46	1.39494	0.27311	5.1076	3.26273e-07	2.1864e-06	1.66246	0.264072	6.2955	3.06414e-10	4.07191e-09	611.927	1937.44	1870.58
LRRC61	1040.06	1.22347	0.242433	5.04662	4.49685e-07	2.92981e-06	1.26072	0.234421	5.37803	7.53059e-08	6.12086e-07	449.134	1076.48	1048.98
AUNIP	339.932	1.83474	0.237034	7.74042	9.90858e-15	2.43058e-13	2.12251	0.229333	9.25514	2.13949e-20	1.81838e-18	86.0613	373.933	306.242
PLA2G5	117.902	-4.13897	0.453281	-9.13114	6.77818e-20	3.63891e-18	-2.87306	0.437963	-6.56005	5.37898e-11	8.24047e-10	786.639	107.419	44.6474
ADGRE2	406.131	1.08365	0.332549	3.25861	0.0011196	0.00323252	1.58452	0.321566	4.92753	8.32756e-07	5.48474e-06	153.978	461.835	326.411
KLF2	970.272	-3.25956	0.307839	-10.5885	3.36795e-26	4.75818e-24	-2.73469	0.297607	-9.18891	3.96834e-20	3.2055e-18	5537.53	832.077	578.322
SYNGR3	120.534	1.11989	0.430951	2.59864	0.00935949	0.0208124	1.82489	0.416781	4.37855	1.19474e-05	6.06775e-05	40.1681	142.235	87.2654
PKMYT1	1229.38	1.70516	0.258808	6.5885	4.44282e-11	6.05371e-10	1.8798	0.250262	7.51134	5.85231e-14	1.46106e-12	358.903	1320.38	1169.8
WFIKKN1	60.5151	1.76547	0.406641	4.34159	1.41452e-05	6.55298e-05	1.08981	0.393573	2.76901	0.00562261	0.0143374	24.277	51.9671	82.979
CHTF18	1663.65	1.86438	0.205972	9.0516	1.40887e-19	7.19368e-18	1.7183	0.199178	8.62699	6.29903e-18	3.24035e-16	502.587	1654.18	1830.32
GNG13	6.40991	2.12919	0.621094	3.42813	0.00060775	0.00188386	2.10615	0.604232	3.48567	0.000490905	0.00168176	1.47496	6.5403	6.66716
IL17B	14.5467	-2.14495	0.29178	-7.35124	1.96378e-13	3.90471e-12	-1.72806	0.280914	-6.15156	7.67227e-10	9.3619e-09	47.2421	14.2454	10.6653
VIL1	16.1393	2.14464	0.708295	3.02789	0.00246265	0.00646183	3.49973	0.687083	5.09361	3.51318e-07	2.48465e-06	1.86157	165.918	10.895
ZNF835	37.5383	-1.75496	0.456312	-3.84597	0.000120076	0.000443875	-1.56556	0.440982	-3.55016	0.000385001	0.00135971	106.462	35.9326	31.4745
GNG11	992.255	-2.10462	0.274781	-7.65926	1.87012e-14	4.43682e-13	-1.68316	0.265652	-6.33596	2.35868e-10	3.20191e-09	3130.49	974.903	727.895
GNGT1	58.0214	1.4814	0.403051	3.67547	0.000237415	0.00081198	1.51945	0.390057	3.89545	9.80157e-05	0.000403456	20.862	59.7841	58.2485
FGL2	1338.85	-3.90431	0.389181	-10.0321	1.10113e-23	1.07203e-21	-3.51381	0.376262	-9.33872	9.75073e-21	9.20809e-19	11029.3	965.569	736.593
SGCE	817.344	-1.89598	0.336345	-5.63702	1.73016e-08	1.47906e-07	-1.38806	0.325174	-4.26866	1.9665e-05	9.57679e-05	2186.63	835.445	587.417
LRFN1	169.6	1.21229	0.342941	3.53499	0.000407791	0.00131906	1.53042	0.331685	4.61406	3.94869e-06	2.23801e-05	64.636	186.943	150.001
ZFP36	16957.5	-3.16788	0.289731	-10.9339	7.94036e-28	1.46274e-25	-2.78629	0.280124	-9.94663	2.6087e-23	4.35253e-21	98480.4	14275.6	10957.9
RASL11B	376.289	1.06471	0.405332	2.62675	0.00862042	0.0193892	1.24966	0.391929	3.18849	0.00143018	0.00430972	168.477	400.718	352.447
ADM2	281.271	2.01594	0.379572	5.31107	1.08983e-07	8.02425e-07	2.35739	0.367132	6.42109	1.35298e-10	1.92349e-09	61.2486	314.16	247.907
VPREB3	46.0542	-2.36765	0.492435	-4.80804	1.52421e-06	8.86956e-06	-1.78097	0.475829	-3.74287	0.000181929	0.000699932	158.103	71.7814	123.583
SDF2L1	1560.69	1.08152	0.218386	4.95235	7.33231e-07	4.56962e-06	1.35615	0.211162	6.42231	1.34224e-10	1.91239e-09	664.345	1700.99	1406.11
GNAZ	192.955	-2.72535	0.42718	-6.37985	1.77262e-10	2.16283e-09	-2.41741	0.412952	-5.85397	4.7997e-09	5.00664e-08	908.972	170.062	137.367
BAIAP2L2	338.54	2.15072	0.43388	4.95696	7.16043e-07	4.47587e-06	1.39203	0.419586	3.31762	0.000907894	0.00289236	108.089	283.768	480.145
LIF	1166.07	-1.69384	0.390577	-4.33675	1.44605e-05	6.68912e-05	-1.60883	0.377621	-4.26044	2.04021e-05	9.90858e-05	3323.87	1089.81	1027.39
C22orf23	149.989	-1.03866	0.256757	-4.04529	5.22574e-05	0.000212169	-1.352	0.248232	-5.44653	5.13633e-08	4.30368e-07	334.445	130.852	162.564
APOBEC3A	392.368	-1.34915	0.542513	-2.48685	0.0128881	0.0274816	-2.17958	0.524531	-4.1553	3.24863e-05	0.000150412	1274.11	281.273	500.124
RIBC2	164.182	1.7877	0.282588	6.32618	2.51297e-10	2.98286e-09	1.9081	0.27347	6.97736	3.00785e-12	5.74193e-11	46.3757	174.537	160.503
RNF112	64.0537	-2.63747	0.342908	-7.69147	1.45452e-14	3.47715e-13	-2.2995	0.331295	-6.94097	3.89422e-12	7.30558e-11	285.091	57.9327	45.8117
VGF	91.0746	2.27854	0.413796	5.50642	3.662e-08	2.95571e-07	2.4914	0.400568	6.21967	4.98188e-10	6.34435e-09	17.526	189.781	85.6157
FOXP2	257.317	-3.64528	0.439636	-8.2916	1.1174e-16	3.68349e-15	-2.86864	0.424971	-6.75019	1.47656e-11	2.49041e-10	1635.31	223.889	130.64
STRIP2	292.401	2.30346	0.324119	7.10682	1.18746e-12	2.05644e-11	2.18081	0.313553	6.95515	3.52179e-12	6.63875e-11	65.2514	295.266	321.494
FLNC	6315.06	-6.15261	0.523712	-11.7481	7.22507e-32	2.42427e-29	-4.71794	0.506339	-9.31776	1.18826e-20	1.08543e-18	86235.3	3276.73	1212.12
LRRC4	118.169	-1.77403	0.416344	-4.26098	2.03529e-05	9.09466e-05	-1.92124	0.402499	-4.77327	1.81254e-06	1.10724e-05	388.249	102.501	113.457
CCDC136	179.408	-2.76863	0.323317	-8.5632	1.09777e-17	4.11718e-16	-2.34307	0.312493	-7.49798	6.48072e-14	1.60564e-12	828.026	163.087	121.49
IRF5	1946.68	1.57396	0.259983	6.05411	1.41196e-09	1.47885e-08	1.51248	0.251381	6.01667	1.78042e-09	2.03293e-08	692.664	1976.73	2062.83
FEZF1	41.056	2.21983	0.710438	3.1246	0.00178047	0.00486477	2.65259	0.687535	3.85811	0.000114267	0.000462654	7.44338	46.7577	48.7789
OPN1SW	129.249	-1.55155	0.207714	-7.46964	8.04123e-14	1.71309e-12	-1.13881	0.200673	-5.67494	1.38735e-08	1.32716e-07	292.339	132.396	99.4059
GAD1	241.767	1.67164	0.479038	3.48958	0.000483779	0.00153499	1.53143	0.463242	3.30589	0.000946754	0.00300246	83.4534	241.507	266.113
CGNL1	482.954	-3.29946	0.346023	-9.53538	1.49335e-21	1.013e-19	-3.28627	0.334523	-9.82375	8.89706e-23	1.35875e-20	3401.62	348.674	345.401
KNSTRN	1052.12	1.32064	0.181832	7.26293	3.78799e-13	7.19681e-12	1.42507	0.175842	8.10425	5.30721e-16	1.91412e-14	412.285	1106.42	1029.17
CHAC1	288.078	2.00005	0.298716	6.6955	2.14928e-11	3.06877e-10	2.2844	0.288984	7.90493	2.68086e-15	8.4118e-14	65.3843	317.987	261.099
CLN6	2850.68	1.03735	0.161153	6.43707	1.21802e-10	1.53293e-09	1.03204	0.155822	6.62319	3.51527e-11	5.59125e-10	1425.87	2915.76	2926.66
ACKR4	63.0755	-1.1267	0.423176	-2.66248	0.00775681	0.0176774	-1.85141	0.409177	-4.52472	6.04763e-06	3.28386e-05	171.866	47.6364	78.7261
PALLD	9122.39	-3.74385	0.303451	-12.3376	5.68306e-35	2.88607e-32	-2.97135	0.293386	-10.1278	4.16066e-24	7.82044e-22	61018	7780.2	4554.48
BBOX1	73.2865	1.31387	0.521607	2.51889	0.0117726	0.0254056	1.22027	0.504501	2.41877	0.015573	0.0348028	70.4211	100.466	78.808
E2F8	723.016	1.6897	0.27174	6.21809	5.03238e-10	5.65203e-09	1.38316	0.262781	5.26354	1.41304e-07	1.08706e-06	264.434	690.728	854.305
PIMREG	646.38	2.08537	0.293007	7.11712	1.10206e-12	1.91916e-11	2.16957	0.283372	7.65626	1.91424e-14	5.2044e-13	151.996	682.915	644.219
ATP1B2	90.5429	-2.67188	0.328283	-8.13895	3.98726e-16	1.21822e-14	-2.41798	0.317231	-7.62212	2.49548e-14	6.63697e-13	424.155	79.4303	66.5571
AP1M2	4845.23	1.20735	0.269702	4.47662	7.58357e-06	3.75185e-05	1.03864	0.260765	3.98306	6.80346e-05	0.000292301	2320.42	4767.52	5358.99
KLK10	684.845	2.95454	0.753056	3.9234	8.73096e-05	0.000335559	2.96178	0.728146	4.06756	4.75084e-05	0.000211067	2430.99	1197.93	1438.1
ADCY4	371.179	-1.29775	0.242002	-5.36259	8.20386e-08	6.19576e-07	-1.06619	0.233945	-4.55744	5.17814e-06	2.86343e-05	776.861	371.148	316.097
BCL2L2	2190.8	-1.50603	0.161269	-9.33863	9.75911e-21	5.78466e-19	-1.51248	0.155916	-9.70061	2.99692e-22	4.04026e-20	5768.32	2021.43	2030.39
AJUBA	1867.26	1.25835	0.279677	4.4993	6.81775e-06	3.41908e-05	1.05219	0.270417	3.89098	9.98387e-05	0.000410182	879.377	1823.75	2103.91
CDO1	78.6098	-1.89319	0.562982	-3.36278	0.000771612	0.00232424	-2.01124	0.544265	-3.69533	0.0002196	0.000828395	273.628	67.9097	73.7443
FOXJ1	934.093	1.59271	0.639957	2.48878	0.0128182	0.0273479	1.78514	0.618756	2.88504	0.0039136	0.0104187	292.608	1008.75	882.796
RHBDF2	2446.95	1.12703	0.185055	6.09027	1.12722e-09	1.20275e-08	1.28125	0.178932	7.16055	8.03549e-13	1.65869e-11	1070.31	2602.24	2338.44
FGF13	109.034	-2.3628	0.380559	-6.20876	5.34032e-10	5.95517e-09	-1.88281	0.367804	-5.11907	3.07049e-07	2.1978e-06	391.111	106.016	76.034
SGO1	461.746	2.14052	0.246906	8.66938	4.34488e-18	1.74445e-16	2.31835	0.238864	9.70574	2.85005e-22	3.86894e-20	99.7854	496.949	439.372
CDH15	17.0375	1.97454	0.504391	3.9147	9.0516e-05	0.000345971	2.79448	0.489665	5.70691	1.15045e-08	1.11997e-07	3.00524	20.6534	15.1061
PLPPR3	9.18868	1.54663	0.630731	2.45212	0.0142016	0.029959	2.14433	0.611564	3.5063	0.000454385	0.00157293	2.38263	21.1832	10.5673
LBP	47.9265	2.07889	0.582219	3.57063	0.000356118	0.00116841	2.62198	0.56354	4.6527	3.2761e-06	1.88968e-05	9.06887	71.8897	393.44
TNNI3	96.2152	5.41847	0.67973	7.9715	1.56765e-15	4.36386e-14	6.00318	0.66075	9.08541	1.03313e-19	7.64986e-18	1.73501	113.313	75.5544
PRRG3	35.9528	-4.007	0.469278	-8.53866	1.35792e-17	5.0326e-16	-2.5787	0.452738	-5.69579	1.22805e-08	1.18636e-07	209.985	35.1824	13.0331
KCNA5	28.3003	-3.53333	0.44492	-7.9415	1.99744e-15	5.48713e-14	-3.27331	0.429661	-7.61835	2.56946e-14	6.80595e-13	204.854	21.3155	17.7484
STARD8	270.598	-1.83492	0.267072	-6.8705	6.39753e-12	9.90195e-11	-1.43438	0.258154	-5.55628	2.75592e-08	2.45994e-07	733.3	271.315	205.534
FAM155B	173.27	1.86967	0.534669	3.49687	0.000470754	0.00149809	1.23634	0.517061	2.3911	0.0167981	0.0371836	64.4124	151.926	235.712
LDLR	3802.19	-1.81374	0.313928	-5.77756	7.57915e-09	6.93004e-08	-1.63638	0.303517	-5.39138	6.99172e-08	5.70903e-07	11141	3583.65	3169.07
CNN1	9650.21	-5.74492	0.559574	-10.2666	9.96541e-25	1.12126e-22	-4.29698	0.541016	-7.94243	1.98264e-15	6.40606e-14	116398	5921.42	2170.44
APOC1	2086.13	2.27928	0.365518	6.23575	4.49631e-10	5.09257e-09	2.56869	0.353424	7.26801	3.64811e-13	7.94134e-12	389.119	2308.71	1889.07
LRCH2	174.204	-2.71964	0.369333	-7.36365	1.78952e-13	3.58095e-12	-2.58791	0.357019	-7.24865	4.20934e-13	9.09217e-12	879.304	146.159	133.327
DPP6	21.4218	-1.95428	0.702185	-2.78314	0.00538357	0.0127821	-2.41368	0.678841	-3.55559	0.000377135	0.00133482	87.6692	21.098	50.214
KIF1A	217.489	2.16139	0.723411	2.98778	0.00281012	0.00724707	2.46136	0.699536	3.51856	0.0004339	0.00151124	64.6446	316.612	477.013
GTPBP3	1222.74	1.10891	0.1308	8.47788	2.29337e-17	8.23946e-16	1.08748	0.1265	8.5967	8.20393e-18	4.11259e-16	586.417	1247.17	1265.77
BST2	10138.2	1.15815	0.371941	3.11382	0.00184685	0.00502488	1.04953	0.359611	2.91852	0.00351695	0.00948137	4902.09	10146.8	10940.2
USHBP1	103.558	-1.14424	0.238135	-4.80499	1.54757e-06	8.99437e-06	-1.02975	0.23015	-4.47427	7.66716e-06	4.07055e-05	206.967	101.523	93.7745
SNX9	3096.92	-1.20518	0.132491	-9.09636	9.34084e-20	4.88898e-18	-1.08677	0.128092	-8.48432	2.16991e-17	1.0172e-15	6420.02	3022.13	2783.93
STK33	92.935	-1.16936	0.469777	-2.48918	0.0128039	0.0273269	-1.42041	0.454181	-3.12741	0.00176357	0.00518721	219.171	81.8372	97.3093
EPO	9.2537	1.2878	0.521665	2.46864	0.0135626	0.0287566	1.51891	0.505835	3.00277	0.00267532	0.00747209	3.46811	14.2452	10.2022
FCHO1	883.072	1.58153	0.312786	5.05626	4.27554e-07	2.79434e-06	1.53469	0.30245	5.0742	3.89132e-07	2.72643e-06	310.611	900.394	930.106
KLHDC7B	5429.22	3.96062	0.566487	6.99155	2.71861e-12	4.44971e-11	3.71557	0.547723	6.78366	1.17166e-11	2.01094e-10	408.566	5367.42	6361.12
JUND	9118.5	-1.39688	0.219469	-6.36479	1.95553e-10	2.36908e-09	-1.39073	0.212192	-6.55413	5.5968e-11	8.53403e-10	22287.2	8500.02	8463.95
HRC	48.9753	-1.72086	0.346213	-4.97054	6.67683e-07	4.19731e-06	-1.61317	0.334555	-4.82184	1.42237e-06	8.90655e-06	140.201	77.2527	42.6229
SULT4A1	72.3293	3.40746	0.77891	4.37465	1.21628e-05	5.7243e-05	2.70108	0.753675	3.58388	0.000338531	0.00121379	9.49549	61.8686	100.953
OLFM1	268.417	-2.91516	0.439892	-6.627	3.42578e-11	4.74708e-10	-2.09438	0.425233	-4.92526	8.42476e-07	5.54129e-06	1138.06	266.478	150.85
TNNI2	2093.67	1.99989	0.561954	3.5588	0.000372548	0.00121552	1.34916	0.543334	2.48312	0.0130236	0.0297499	701.025	1786.2	2804.18
PNPLA7	225.562	-1.62149	0.281606	-5.75801	8.51106e-09	7.71828e-08	-1.51524	0.272224	-5.56615	2.60435e-08	2.33961e-07	609.556	213.316	198.207
MNX1	93.7403	3.20515	0.449274	7.13406	9.74473e-13	1.71445e-11	3.39007	0.435293	7.78803	6.80633e-15	1.99775e-13	9.74856	101.878	89.6085
CEP85	1050.54	1.05775	0.184644	5.72859	1.01269e-08	9.04389e-08	1.17066	0.178551	6.55648	5.50913e-11	8.41347e-10	489.658	1102.34	1019.41
GATA5	95.5278	-4.73937	0.655768	-7.2272	4.93052e-13	9.21835e-12	-3.52611	0.633745	-5.56392	2.63781e-08	2.36315e-07	854.513	74.1758	31.9683
RBBP8NL	811.875	2.22991	0.420652	5.30107	1.15126e-07	8.42047e-07	1.75267	0.40675	4.30896	1.64027e-05	8.11745e-05	219.79	741.062	1031.59
PRDM12	6.72656	1.68425	0.430669	3.91076	9.20059e-05	0.00035081	1.81554	0.419862	4.32414	1.53126e-05	7.61851e-05	2.02057	7.16341	6.57445
TMEM160	502.93	1.04417	0.250401	4.16997	3.04638e-05	0.000130035	1.10102	0.242142	4.54701	5.44136e-06	2.99206e-05	243.707	523.069	502.843
SMPDL3B	493.324	1.7587	0.386291	4.55278	5.29428e-06	2.71876e-05	1.85781	0.373543	4.97349	6.57581e-07	4.40521e-06	143.778	521.833	487.159
CLIP1	4828.67	-1.14532	0.173203	-6.61259	3.77664e-11	5.19876e-10	-1.02309	0.167458	-6.10952	9.99284e-10	1.19474e-08	9592.74	4719.84	4336.43
DNMT1	4644.64	1.01762	0.178497	5.70105	1.19072e-08	1.04501e-07	1.0495	0.172585	6.08105	1.19397e-09	1.40686e-08	2313.56	4788.21	4683.53
DUSP9	476.607	2.35943	0.504257	4.67902	2.8825e-06	1.57815e-05	2.31709	0.487616	4.75187	2.01543e-06	1.21786e-05	96.3123	480.402	494.719
HSD17B3	60.1561	1.48139	0.496145	2.98581	0.00282832	0.00728401	2.07031	0.480016	4.313	1.61052e-05	7.98077e-05	16.6059	77.7922	46.4811
HABP4	538.031	-1.85444	0.214268	-8.65476	4.93938e-18	1.97051e-16	-1.35638	0.20712	-6.54877	5.80127e-11	8.79446e-10	1411.04	550.988	390.031
RGN	74.4344	-2.85467	0.440031	-6.48742	8.73197e-11	1.12688e-09	-2.46836	0.42526	-5.80435	6.46163e-09	6.56166e-08	366.265	66.1486	50.6268
ULBP2	345.046	2.39553	0.346283	6.91786	4.58528e-12	7.22192e-11	2.4192	0.334963	7.2223	5.11164e-13	1.08611e-11	67.6104	361.239	355.336
AKAP12	2447.18	-2.94684	0.368274	-8.00175	1.22662e-15	3.46588e-14	-2.57941	0.356058	-7.24435	4.34505e-13	9.35503e-12	12742.6	2131.96	1652.55
SYNE1	1441.39	-2.6369	0.274465	-9.60742	7.43889e-22	5.27459e-20	-2.48784	0.265354	-9.37555	6.88133e-21	6.79375e-19	6905.42	1231.01	1110.09
BPIFA2	9.79055	3.53021	0.921571	3.83064	0.00012781	0.000468322	2.86946	0.894972	3.2062	0.00134499	0.00407879	7.31697	8.60407	13.6194
ARHGEF9	964.812	-1.56302	0.170923	-9.14458	5.98625e-20	3.26034e-18	-1.43115	0.165239	-8.6611	4.67235e-18	2.47887e-16	2482.16	920.124	839.735
GINS2	1084.75	1.43103	0.226031	6.33112	2.43381e-10	2.90173e-09	1.60631	0.218571	7.34914	1.99489e-13	4.49781e-12	381.775	1162.1	1029.18
SH3BGRL	4353.81	-1.48584	0.211253	-7.03347	2.01456e-12	3.37376e-11	-1.54176	0.204246	-7.54853	4.40183e-14	1.11604e-12	11584.7	3978.85	4136.07
PRR7	232.693	1.09623	0.269238	4.07161	4.66887e-05	0.00019163	1.20993	0.260403	4.64637	3.37825e-06	1.94573e-05	105.933	245.308	226.767
NFATC1	619.578	-1.81194	0.322687	-5.61516	1.96376e-08	1.66587e-07	-1.49572	0.311968	-4.79448	1.631e-06	1.00672e-05	1715.81	608.559	488.689
IDO1	1954.92	2.16132	0.59937	3.60599	0.000310963	0.00103709	2.07489	0.579511	3.58041	0.000343058	0.00122777	473.107	2237.11	2552.45
RAB11FIP4	2964.75	1.31805	0.292945	4.49932	6.81698e-06	3.41908e-05	1.17927	0.283241	4.16348	3.1344e-05	0.000145745	1297.01	2937.89	3234.53
GALNT15	228.091	-4.05724	0.415714	-9.75969	1.67666e-22	1.32372e-20	-2.47624	0.401737	-6.16383	7.10048e-10	8.73507e-09	1278.19	229.701	76.7412
KCNC3	453.193	1.96095	0.366941	5.34405	9.08922e-08	6.80424e-07	1.94808	0.354855	5.4898	4.02382e-08	3.46662e-07	120.78	466.664	470.83
LRRC4B	113.012	-1.6341	0.412796	-3.95862	7.53837e-05	0.000294544	-2.02673	0.399091	-5.07836	3.80701e-07	2.67408e-06	374.784	91.8955	120.614
PDLIM4	1125.84	-1.52554	0.390061	-3.91104	9.18989e-05	0.000350544	-1.15505	0.37712	-3.06281	0.00219266	0.00627189	2557.68	1148.53	888.386
TUBG1	3244.92	1.0169	0.142816	7.12038	1.07627e-12	1.87948e-11	1.01899	0.138092	7.37903	1.59447e-13	3.67989e-12	1639.62	3322.24	3317.45
AOC3	2348.93	-3.72485	0.397266	-9.37623	6.83746e-21	4.11782e-19	-3.38451	0.384087	-8.81184	1.23109e-18	7.14103e-17	18155.6	1738.53	1373.18
C1orf159	1264.04	1.42505	0.189376	7.52498	5.27295e-14	1.15611e-12	1.16355	0.183131	6.35366	2.10253e-10	2.87213e-09	543.586	1218.44	1460.57
ANO1	3548.53	1.46448	0.398382	3.67606	0.00023686	0.000810231	1.35725	0.38518	3.52368	0.000425595	0.00148457	1389.69	3560.41	3835.1
KREMEN2	181.288	3.15116	0.445599	7.07175	1.52994e-12	2.59455e-11	3.83187	0.431397	8.88246	6.53984e-19	4.07136e-17	35.4939	216.262	134.853
BARX1	200.531	4.83553	0.667965	7.2392	4.51328e-13	8.48045e-12	5.5467	0.647068	8.57205	1.01656e-17	5.03084e-16	5.06685	285.544	233.933
MAP1B	2331.32	-3.99521	0.368799	-10.833	2.40046e-27	3.92215e-25	-3.23696	0.356559	-9.07834	1.10241e-19	7.98144e-18	17663.5	1873.46	1107.58
CKMT2	50.6861	-3.46115	0.335621	-10.3127	6.17675e-25	7.25383e-23	-2.55075	0.323875	-7.87573	3.38757e-15	1.0412e-13	276.869	47.2491	25.1052
KRT34	21.1661	1.79037	0.715514	2.50221	0.0123419	0.0264701	2.05373	0.692594	2.96527	0.00302416	0.00832104	5.61562	110.614	24.1681
KRT33B	37.6358	2.17239	0.652838	3.3276	0.000875968	0.00260064	2.30624	0.631915	3.6496	0.000262648	0.000970924	7.61036	80.54	34.1073
TOP2A	8249.15	1.9849	0.257171	7.71821	1.17978e-14	2.86409e-13	2.04019	0.248651	8.20503	2.30533e-16	8.83753e-15	2094.79	8615.13	8291.23
RAI2	342.345	-2.89764	0.339109	-8.54487	1.2868e-17	4.78792e-16	-2.68782	0.327822	-8.19901	2.42378e-16	9.20001e-15	1843.32	286.096	247.345
NR0B2	2.82157	1.48643	0.654208	2.2721	0.0230802	0.0455448	1.73691	0.637029	2.72658	0.0063995	0.0160865	0.854967	5.35108	5.93144
FAAP24	343.975	1.24288	0.160969	7.72127	1.15178e-14	2.81431e-13	1.38945	0.155754	8.9208	4.62932e-19	2.9286e-17	139.077	364.647	329.417
FBXW9	736.962	1.00235	0.146074	6.86195	6.79251e-12	1.04702e-10	1.05302	0.141279	7.4535	9.08938e-14	2.19628e-12	367.116	762.58	736.252
RTBDN	24.3103	2.8956	0.579058	5.00054	5.71697e-07	3.65256e-06	3.72498	0.562662	6.62028	3.58518e-11	5.69319e-10	8.77809	34.8181	20.8327
MATN3	212.384	1.77355	0.324832	5.45991	4.76389e-08	3.75949e-07	2.30978	0.314251	7.3501	1.98058e-13	4.47071e-12	49.1325	243.563	167.885
SLC6A11	497.756	1.53556	0.531722	2.88791	0.00387814	0.00960716	1.53778	0.514127	2.99105	0.00278024	0.00772321	177.173	514.528	513.753
NUP210	4463.64	1.60823	0.321916	4.99579	5.85954e-07	3.73349e-06	1.71372	0.31125	5.50592	3.67235e-08	3.19622e-07	1437.12	4713.97	4381.61
PER2	916.683	-2.25122	0.205331	-10.9639	5.69931e-28	1.10402e-25	-2.20227	0.198505	-11.0943	1.33724e-28	5.22808e-26	3672.92	798.162	771.447
RAMP1	851.931	-3.20968	0.453365	-7.07967	1.44503e-12	2.45943e-11	-2.04377	0.438303	-4.66291	3.11771e-06	1.80578e-05	3646.6	884.422	394.149
FIGNL1	756.15	1.22461	0.18993	6.44767	1.13582e-10	1.43911e-09	1.15344	0.183679	6.27965	3.3934e-10	4.46995e-09	342.966	762.714	801.288
ENAM	2.42821	-2.14135	0.505042	-4.23995	2.23571e-05	9.88912e-05	-1.93197	0.485046	-3.98307	6.80298e-05	0.000292301	8.62741	2.27178	1.89012
JCHAIN	3543	-2.01285	0.53696	-3.7486	0.000177823	0.000629718	-1.70749	0.519155	-3.28898	0.00100552	0.00316266	11129.8	3407.87	2757.78
KDM6B	3264.88	-1.27783	0.188132	-6.79217	1.10458e-11	1.64462e-10	-1.33809	0.181892	-7.35649	1.88811e-13	4.29673e-12	7626.97	3016.96	3145.68
CLEC10A	190.862	-1.94897	0.437958	-4.45013	8.58196e-06	4.18953e-05	-1.80656	0.423396	-4.26683	1.98266e-05	9.65308e-05	618.962	176.983	160.364
GUCY2D	28.7919	1.19988	0.461665	2.59902	0.00934909	0.0207967	1.15418	0.446838	2.58299	0.00979471	0.023324	13.1931	29.2839	30.2044
RGS22	16.4737	-3.81975	0.443856	-8.60584	7.57609e-18	2.9231e-16	-3.08399	0.427761	-7.20962	5.61075e-13	1.18572e-11	115.693	13.6983	8.13626
MATN2	2457.7	-2.58408	0.388664	-6.64862	2.95861e-11	4.13941e-10	-2.245	0.375773	-5.97436	2.30991e-09	2.56266e-08	10531.2	2221.59	1756.25
REEP2	225.864	-2.13691	0.396537	-5.38892	7.08827e-08	5.41858e-07	-1.71124	0.383333	-4.46412	8.03983e-06	4.24752e-05	726.826	221.905	165.133
HSPA12B	287.721	-1.72871	0.275539	-6.27391	3.52095e-10	4.0663e-09	-1.06908	0.266332	-4.0141	5.96733e-05	0.000259683	648.041	308.932	195.518
ANKEF1	658.996	1.31338	0.204237	6.43068	1.27032e-10	1.59554e-09	1.25814	0.197519	6.36969	1.89405e-10	2.60555e-09	278.605	667.613	693.553
PCNA	7843.24	1.2828	0.184403	6.9565	3.48828e-12	5.64041e-11	1.35834	0.178294	7.61856	2.56514e-14	6.80372e-13	3200.17	8205.14	7786.52
RHBG	654.512	3.20355	0.565425	5.66574	1.46389e-08	1.26642e-07	3.06477	0.546774	5.60518	2.08038e-08	1.91827e-07	76.4764	640.11	704.738
KHDC4	2567.42	1.33548	0.17716	7.53827	4.7625e-14	1.05527e-12	1.13517	0.171303	6.62669	3.43294e-11	5.46921e-10	1144.37	2513.65	2888.11
NES	2404.06	-1.89051	0.316141	-5.97996	2.23192e-09	2.25472e-08	-1.11262	0.30565	-3.64018	0.000272451	0.00100318	5657.11	2616.08	1525.78
CRP	8.31873	3.60031	0.942008	3.82195	0.000132399	0.000482689	2.14402	0.914755	2.34382	0.0190875	0.04143	1.24953	18.8747	19.3141
HAPLN2	6.11628	-1.99103	0.433334	-4.59468	4.33412e-06	2.26847e-05	-1.5947	0.417195	-3.82243	0.000132141	0.000526412	18.2638	9.6211	4.59239
SYT11	685.511	-2.09036	0.321387	-6.50418	7.81205e-11	1.01936e-09	-1.73319	0.310711	-5.57815	2.43094e-08	2.20102e-07	2209.64	664.523	518.756
TESMIN	285.598	1.87033	0.327529	5.71043	1.12691e-08	9.95988e-08	2.12536	0.31681	6.70862	1.9647e-11	3.26027e-10	71.1873	311.224	260.796
DMGDH	26.3691	-3.06459	0.273689	-11.1973	4.20169e-29	9.1802e-27	-2.74084	0.263796	-10.39	2.7528e-25	7.08048e-23	148.602	22.2185	17.7028
BHMT2	96.1482	-4.7921	0.434595	-11.0266	2.84455e-28	5.87353e-26	-3.7928	0.419807	-9.03462	1.64568e-19	1.14483e-17	942.74	68.0304	34.017
KANK4	166.608	2.05769	0.672419	3.06013	0.00221242	0.00587748	3.11076	0.650314	4.78347	1.72294e-06	1.05679e-05	24.187	209.063	100.73
WASF3	346.943	-1.28811	0.302814	-4.2538	2.10174e-05	9.356e-05	-1.03459	0.292746	-3.5341	0.000409163	0.00143365	715.54	349.126	292.865
CHRM3	332.038	-3.81985	0.500631	-7.63007	2.34623e-14	5.44267e-13	-3.08619	0.483972	-6.37679	1.8084e-10	2.49299e-09	2329.08	274.225	164.904
CHIT1	300.889	2.75019	0.592282	4.64337	3.4277e-06	1.84387e-05	3.76571	0.572866	6.57345	4.91623e-11	7.59641e-10	27.7348	377.088	231.588
LGR6	223.41	-1.62549	0.510964	-3.18122	0.00146657	0.00409706	-1.51563	0.493997	-3.0681	0.00215426	0.00618286	584.034	204.225	189.221
DCLK1	271.158	-2.74856	0.481526	-5.70803	1.14293e-08	1.0073e-07	-2.2951	0.465513	-4.93026	8.21193e-07	5.41771e-06	1225.72	249.737	182.284
CCNA1	89.1772	1.69717	0.720078	2.35693	0.0184269	0.0375126	2.2281	0.69639	3.1995	0.00137664	0.00416637	21.9773	160.383	132.603
SPART	2242.66	-1.37905	0.178646	-7.7195	1.16788e-14	2.84254e-13	-1.13195	0.172715	-6.55389	5.60564e-11	8.54084e-10	4901.33	2236.21	1884.18
EPSTI1	1774.62	1.39737	0.366469	3.81306	0.000137259	0.00049876	1.50883	0.354332	4.25823	2.0605e-05	9.99968e-05	660.209	1879.15	1739.44
TRPC4	48.6126	-2.24629	0.309911	-7.24819	4.22367e-13	7.96016e-12	-1.89283	0.29931	-6.32398	2.54915e-10	3.44373e-09	172.038	46.2614	36.1918
STOML3	7.73702	1.82229	0.689678	2.64223	0.00823627	0.018648	2.61822	0.66953	3.91054	9.20909e-05	0.00038172	1.4992	9.33224	5.38878
RFC3	871.889	1.12145	0.204043	5.49614	3.88186e-08	3.10913e-07	1.18407	0.197312	6.00101	1.9609e-09	2.21314e-08	399.97	908.505	869.819
STARD13	654.633	-2.36721	0.265702	-8.90928	5.13663e-19	2.44347e-17	-1.8881	0.256859	-7.35071	1.9716e-13	4.46052e-12	2354.53	636.071	456.305
BEX1	15.0333	-1.7963	0.536016	-3.35121	0.00080458	0.0024081	-1.84647	0.517939	-3.56503	0.000363812	0.00129494	48.1416	70.7577	71.5031
SLC39A11	2807	1.00306	0.175717	5.7084	1.14043e-08	1.00651e-07	1.03247	0.169901	6.07689	1.22537e-09	1.43951e-08	1414.47	2894.69	2836.24
EPHB2	1842.04	1.4851	0.318945	4.6563	3.21944e-06	1.74232e-05	1.75662	0.308386	5.69617	1.22532e-08	1.18459e-07	595.607	2012.95	1667.66
KMT5C	788.787	1.19193	0.187376	6.36116	2.00233e-10	2.41954e-09	1.0045	0.181206	5.5434	2.96657e-08	2.63115e-07	385.54	774.05	881.403
MYH11	64059.9	-6.49146	0.595273	-10.905	1.09081e-27	1.95203e-25	-5.03355	0.575536	-8.74584	2.21359e-18	1.22235e-16	948675	28964.4	10543.6
LARGE1	1198.09	-1.11008	0.281332	-3.94582	7.95289e-05	0.000308622	-1.47725	0.272003	-5.43099	5.60408e-08	4.6676e-07	2851.87	1024.2	1321
MYO18B	81.7734	-2.89798	0.580456	-4.99259	5.95743e-07	3.78688e-06	-2.48706	0.561081	-4.43262	9.30943e-06	4.83348e-05	406.002	72.3737	54.4085
C1QTNF6	2865.08	2.09571	0.311172	6.73489	1.64054e-11	2.38959e-10	2.68977	0.300876	8.93981	3.8985e-19	2.52269e-17	517.891	3341.65	2213.73
GGT2	29.7689	4.6001	0.771118	5.96549	2.43895e-09	2.43895e-08	3.95972	0.748978	5.28683	1.24454e-07	9.70028e-07	1.61377	25.6542	39.9306
SEC14L4	54.5871	2.48777	0.63844	3.89663	9.75388e-05	0.000369507	2.44564	0.617855	3.95828	7.54918e-05	0.000320459	10.2278	56.0976	57.7548
TMTC1	752.146	-1.99169	0.40016	-4.97724	6.44976e-07	4.06954e-06	-1.87396	0.386882	-4.84375	1.27409e-06	8.07582e-06	2528.58	689.841	635.768
SPINK5	705.438	1.60852	0.474441	3.39036	0.000698021	0.00212988	1.43666	0.45874	3.13176	0.00173763	0.0051232	22566.7	957.428	1018.16
LYVE1	366.954	-4.23824	0.472313	-8.97336	2.876e-19	1.4221e-17	-2.49543	0.456533	-5.46606	4.60159e-08	3.91095e-07	2099.9	372.475	111.247
RNF122	535.796	-2.26852	0.221967	-10.2201	1.61192e-24	1.75075e-22	-2.04497	0.214572	-9.53048	1.56557e-21	1.85477e-19	2019.17	489.439	419.103
DUSP26	18.7209	-2.16034	0.497763	-4.34009	1.42425e-05	6.59315e-05	-1.11973	0.480318	-2.33122	0.0197416	0.0426513	45.757	21.0536	10.2524
MEN1	2893.01	1.2541	0.114366	10.9657	5.58958e-28	1.09404e-25	1.19358	0.110595	10.7924	3.73991e-27	1.14231e-24	1278.72	2926.55	3052.07
CATSPERB	119.783	1.50133	0.370675	4.05026	5.11602e-05	0.000207939	1.33559	0.358578	3.72467	0.00019557	0.000746095	46.728	118.375	132.766
PEBP4	6.54821	-1.82232	0.424636	-4.29147	1.77492e-05	8.04216e-05	-1.15048	0.408452	-2.81668	0.00485228	0.0126167	15.5385	6.98395	4.41143
CTIF	1610.92	-1.25256	0.163722	-7.65053	2.00158e-14	4.71299e-13	-1.10912	0.158285	-7.00714	2.43245e-12	4.71722e-11	3396.95	1574.44	1425.36
CCNB1	3444.86	1.98275	0.234868	8.442	3.11961e-17	1.10599e-15	1.96705	0.227097	8.66169	4.64819e-18	2.47583e-16	908.438	3551.11	3590.05
CAMK1	180.366	-1.27418	0.24318	-5.23967	1.60866e-07	1.14582e-06	-1.06152	0.235053	-4.51609	6.29917e-06	3.40814e-05	375.188	179.609	154.962
MEIS2	936.192	-2.00693	0.256349	-7.82889	4.92198e-15	1.27213e-13	-1.78922	0.247834	-7.21942	5.2209e-13	1.10812e-11	3040.35	879.523	756.406
TSPAN2	629.154	-3.27848	0.380442	-8.61756	6.83981e-18	2.6499e-16	-2.19503	0.367781	-5.96832	2.39711e-09	2.65188e-08	2904.55	634.332	299.324
TSHB	0.954453	-3.77206	0.594574	-6.34414	2.23664e-10	2.68197e-09	-3.06041	0.561345	-5.45193	4.98272e-08	4.18897e-07	6.78475	0.798414	0.453605
GSTM5	293.919	-2.82469	0.484379	-5.83157	5.49073e-09	5.13799e-08	-1.99289	0.468259	-4.25595	2.0816e-05	0.000100846	1176.38	295.54	166.039
PSRC1	641.197	1.57028	0.22022	7.13052	9.99875e-13	1.75586e-11	1.54957	0.212984	7.27551	3.45102e-13	7.55438e-12	225.292	658.315	667.908
WNT2B	226.002	-1.94648	0.256999	-7.57387	3.62262e-14	8.18138e-13	-1.72352	0.248412	-6.93816	3.97226e-12	7.42349e-11	706.325	213.802	183.228
NGF	51.7615	-1.59864	0.441275	-3.62279	0.000291447	0.000979308	-1.2143	0.426465	-2.84735	0.00440848	0.0115736	122.15	52.7259	40.3119
ROCK2	2894.97	-1.44643	0.136887	-10.5666	4.25537e-26	5.92284e-24	-1.34322	0.132341	-10.1497	3.32419e-24	6.43378e-22	6995.34	2756.36	2566.08
RSAD2	1398.07	2.44891	0.431751	5.67205	1.41098e-08	1.22346e-07	1.96744	0.417465	4.71282	2.4431e-06	1.4516e-05	329.299	1287.82	1798.03
MYCN	454.946	1.63706	0.584379	2.80137	0.0050886	0.0121663	2.0599	0.565046	3.64555	0.000266823	0.000984125	120.642	503.075	375.283
CMPK2	895.864	1.77517	0.322861	5.49823	3.83616e-08	3.07777e-07	1.55131	0.312194	4.96905	6.72824e-07	4.49961e-06	299.738	878.931	1026.46
SAA2	265.338	3.40268	0.645084	5.27478	1.32914e-07	9.5908e-07	2.97276	0.623905	4.76477	1.89068e-06	1.14886e-05	50.8845	340.332	469.217
IL6ST	4065.71	-1.89898	0.219665	-8.64491	5.38458e-18	2.12555e-16	-1.72869	0.212378	-8.13967	3.96352e-16	1.45091e-14	12643	3814.62	3389.88
CFHR4	10.2805	2.2207	0.716709	3.09846	0.00194526	0.00525013	2.62114	0.695452	3.76897	0.00016392	0.000638435	1.82881	11.6374	8.8152
GRP	28.7768	2.67127	0.753859	3.54346	0.00039491	0.00128136	3.93371	0.730756	5.38307	7.32272e-08	5.96187e-07	13.3926	37.2131	42.0951
EMP1	9137.77	-3.22073	0.339078	-9.49851	2.12918e-21	1.39886e-19	-2.75634	0.327833	-8.40776	4.17916e-17	1.83582e-15	52879.7	7826.22	5672.19
SOX5	55.6854	-2.60632	0.328914	-7.924	2.29988e-15	6.25394e-14	-2.36242	0.317745	-7.43496	1.04603e-13	2.50893e-12	253.033	49.1415	41.4975
RERG	260.492	-3.24725	0.354178	-9.1684	4.80087e-20	2.63767e-18	-2.52804	0.342341	-7.38457	1.52948e-13	3.54664e-12	1383.11	239.765	145.612
SLCO1B1	7.76408	3.37365	0.846996	3.98308	6.80288e-05	0.000269107	3.77386	0.825227	4.57312	4.80513e-06	2.67457e-05	0.576109	10.7777	6.69414
MTNR1B	9.97159	4.4754	0.951599	4.70303	2.56331e-06	1.42078e-05	4.50747	0.927083	4.86199	1.16212e-06	7.42148e-06	0.408557	10.0947	9.896
CDCA8	1531.86	2.23282	0.228992	9.75066	1.83275e-22	1.42303e-20	2.3746	0.22145	10.723	7.94108e-27	2.28283e-24	315.547	1635.77	1482.68
DSG1	148.716	2.85647	0.681613	4.19075	2.78038e-05	0.000119797	3.95961	0.659466	6.00427	1.92193e-09	2.17544e-08	595.471	487.555	1339.84
DSC1	24.2707	1.75617	0.638373	2.75102	0.00594107	0.0139698	2.87944	0.618221	4.65763	3.19871e-06	1.8494e-05	20.0721	62.3807	85.7259
DTNA	544.796	-4.47779	0.455832	-9.82332	8.93509e-23	7.49511e-21	-3.79915	0.440672	-8.62127	6.62134e-18	3.38832e-16	5211.56	374.353	233.831
TCN1	1240.07	2.25209	0.729368	3.08772	0.00201695	0.00541949	1.68127	0.705202	2.38409	0.0171213	0.037822	345.755	1108.64	1646.69
PDGFRA	1353.44	-2.62242	0.346668	-7.56465	3.88911e-14	8.76215e-13	-1.80938	0.335157	-5.39862	6.71572e-08	5.51129e-07	4866.24	1388.49	790.31
DZIP1	586.306	-1.45105	0.306867	-4.72859	2.26085e-06	1.26924e-05	-1.02665	0.29667	-3.46058	0.000539017	0.00182264	1240.39	608.776	453.537
ADAMTS8	149.7	-3.54184	0.474882	-7.45834	8.76184e-14	1.84983e-12	-2.9152	0.459015	-6.35098	2.13946e-10	2.9185e-09	957.936	127.048	82.2492
ACRV1	22.6722	1.28268	0.300175	4.27311	1.92769e-05	8.65914e-05	1.25478	0.291223	4.30866	1.64249e-05	8.12638e-05	9.80324	23.1519	23.5295
ANXA1	22324.2	-1.62602	0.385149	-4.22179	2.4237e-05	0.000106281	-1.4933	0.372379	-4.01017	6.06739e-05	0.000263743	59327	21072.8	19220.8
FAM189A2	173.185	-2.56609	0.360119	-7.12568	1.03568e-12	1.81364e-11	-2.89173	0.348146	-8.30608	9.89162e-17	4.02836e-15	941.27	126.858	158.96
PSAT1	1759.71	1.19624	0.271955	4.39867	1.08916e-05	5.18925e-05	1.43238	0.262952	5.44732	5.11347e-08	4.28821e-07	706.879	1908.24	1620.13
MSI1	251.995	2.58561	0.521643	4.95667	7.17115e-07	4.48107e-06	2.81555	0.504533	5.58051	2.39818e-08	2.17539e-07	38.8791	274.189	233.777
RNFT2	269.474	2.21509	0.30445	7.2757	3.44619e-13	6.60754e-12	2.16138	0.294555	7.33776	2.17192e-13	4.86889e-12	61.0058	273.36	283.721
UGT2A3	71.3241	4.07747	1.27311	3.20276	0.00136116	0.00382871	5.48788	1.2346	4.44508	8.78573e-06	4.59819e-05	5.36809	241.579	88.0772
HILPDA	2506.79	1.58662	0.31318	5.06616	4.05916e-07	2.66871e-06	1.69603	0.302809	5.60097	2.13154e-08	1.95987e-07	814.975	2640.32	2447.57
KCP	386.658	1.68859	0.361785	4.66739	3.05046e-06	1.65803e-05	1.54408	0.349862	4.41339	1.01766e-05	5.24662e-05	132.094	385.224	425.81
TES	4997.76	-1.45773	0.199262	-7.31564	2.56157e-13	5.01898e-12	-1.30075	0.192653	-6.7518	1.46017e-11	2.47043e-10	11922.9	4839.37	4340.42
ADGRB3	48.3923	-3.90013	0.56196	-6.94022	3.91492e-12	6.26586e-11	-3.02707	0.542912	-5.57562	2.46652e-08	2.22807e-07	336.308	41.2651	22.4675
HTR1B	13.7417	-2.59671	0.501911	-5.17365	2.29564e-07	1.58526e-06	-2.80712	0.48489	-5.78919	7.07249e-09	7.12644e-08	73.6148	10.4795	12.1034
EPHA7	291.155	-3.25263	0.506835	-6.41754	1.38493e-10	1.72909e-09	-3.28958	0.490002	-6.7134	1.90139e-11	3.16596e-10	2040.96	208.682	214.119
LCA5	257.88	-1.19784	0.196163	-6.10636	1.0193e-09	1.09319e-08	-1.00661	0.189608	-5.30889	1.10294e-07	8.67966e-07	513.287	255.339	223.596
PRPH	12.359	-1.82145	0.574385	-3.17113	0.00151847	0.0042207	-1.83101	0.554967	-3.29932	0.000969199	0.00306568	39.5118	11.1431	11.1545
AMHR2	2.61363	-1.24016	0.430138	-2.88316	0.00393702	0.00972991	-1.11522	0.413756	-2.69536	0.00703124	0.0174624	5.55686	2.57935	2.29709
ITGA7	1313.95	-3.4389	0.374319	-9.18708	4.03635e-20	2.24388e-18	-2.71662	0.36189	-7.50674	6.06163e-14	1.50946e-12	7696.86	1170.94	709.694
RDH5	36.4325	-1.54508	0.283584	-5.4484	5.08247e-08	3.99413e-07	-1.52891	0.273948	-5.58102	2.39106e-08	2.17095e-07	97.612	33.7687	33.2906
PPP1R1A	75.2116	-4.19452	0.586334	-7.1538	8.44093e-13	1.50622e-11	-2.97598	0.566549	-5.25283	1.49783e-07	1.14777e-06	525.637	66.8726	28.7028
TROAP	1413.73	2.65275	0.246033	10.7821	4.18402e-27	6.67033e-25	2.62797	0.237943	11.0445	2.33011e-28	8.75943e-26	236.06	1457.94	1483.2
FAIM2	107.487	-4.06241	0.510913	-7.95129	1.84586e-15	5.09305e-14	-3.22794	0.493763	-6.53743	6.25856e-11	9.43271e-10	817.459	87.2515	48.8726
ESPL1	1373.83	1.54131	0.250098	6.16281	7.14636e-10	7.84346e-09	1.59993	0.241833	6.61583	3.69478e-11	5.85296e-10	879.294	1430.38	1373.45
KRT7	106433	1.82942	0.452039	4.04703	5.18705e-05	0.000210689	1.49729	0.437052	3.42589	0.000612778	0.00204134	35834	101164	127352
PKIB	328.382	1.72845	0.369846	4.67342	2.96227e-06	1.61524e-05	1.45592	0.357669	4.07056	4.68998e-05	0.000208552	114.954	392.026	381.33
MICAL1	2834.25	-1.14156	0.220946	-5.16667	2.383e-07	1.63956e-06	-1.14702	0.213618	-5.36952	7.89474e-08	6.39827e-07	5952.38	2687.82	2698.02
SEMA4F	676.675	1.17158	0.204063	5.74125	9.39788e-09	8.46936e-08	1.315	0.197343	6.66353	2.67333e-11	4.32602e-10	288.132	717.268	649.338
DYSF	1368.95	-2.10564	0.271072	-7.76785	7.98292e-15	1.99202e-13	-1.70198	0.262071	-6.49437	8.33818e-11	1.23574e-09	4358.31	1339.48	1012.62
EMX1	66.9351	1.9487	0.608742	3.20119	0.00136861	0.00384455	2.72324	0.588973	4.62371	3.76932e-06	2.14843e-05	12.2386	80.37	47.0214
KIAA0513	914.348	-1.60689	0.252028	-6.37584	1.81959e-10	2.21295e-09	-1.72574	0.243664	-7.08247	1.41607e-12	2.84495e-11	2685.99	811.976	881.705
FBXL8	339.934	1.13452	0.19842	5.71778	1.07924e-08	9.60178e-08	1.13076	0.19193	5.89152	3.82651e-09	4.08078e-08	159.087	348.452	349.337
CCDC102A	360.618	-1.41548	0.249171	-5.68077	1.3409e-08	1.167e-07	-1.08009	0.24087	-4.48409	7.32241e-06	3.90236e-05	776.656	367.246	290.973
ZNF670-ZNF695	17.1442	2.26142	0.319591	7.07598	1.48401e-12	2.51892e-11	2.44905	0.312143	7.84592	4.2978e-15	1.2945e-13	3.31969	18.485	16.2639
KIAA1614	178.718	-1.90467	0.230774	-8.25337	1.53987e-16	4.99728e-15	-1.65681	0.223028	-7.42869	1.09675e-13	2.62093e-12	539.889	171.058	143.97
FAM129A	3690.14	-4.29828	0.347182	-12.3805	3.33409e-35	1.84258e-32	-3.62096	0.335663	-10.7875	3.9441e-27	1.18614e-24	32806.8	2666.49	1667.4
GPR55	22.3385	-1.37923	0.388296	-3.55201	0.000382299	0.00124539	-1.61513	0.375282	-4.30376	1.67923e-05	8.28509e-05	59.813	19.5465	23.0248
CYP27A1	858.708	-1.50663	0.355967	-4.23249	2.31119e-05	0.000101918	-1.14145	0.344153	-3.31669	0.000910894	0.00290097	1932.47	876.092	680.126
STAB2	19.5307	-3.33272	0.400956	-8.31194	9.4147e-17	3.13656e-15	-2.57911	0.386499	-6.673	2.50629e-11	4.09297e-10	106.26	17.7882	10.5117
CKAP2	2006.91	1.19932	0.194173	6.17657	6.5508e-10	7.22356e-09	1.19401	0.187752	6.35952	2.02388e-10	2.7705e-09	898.575	2055.33	2063
BORA	381.256	1.6673	0.194451	8.57437	9.96335e-18	3.77442e-16	1.61717	0.18814	8.59554	8.28712e-18	4.14314e-16	126.628	388.908	402.761
LRCH1	1001.35	-1.40145	0.157973	-8.87146	7.21911e-19	3.34931e-17	-1.22119	0.152717	-7.99644	1.28067e-15	4.27404e-14	2284.49	979.51	864.391
SPRY2	798.604	-1.10766	0.297923	-3.71796	0.000200839	0.000700532	-1.24143	0.28804	-4.30992	1.63313e-05	8.0862e-05	1723.11	728.848	799.558
EDNRB	617.277	-2.14366	0.356265	-6.01703	1.77649e-09	1.82706e-08	-1.88916	0.344434	-5.48483	4.13869e-08	3.55305e-07	2142.75	578.499	484.962
RCBTB2	564.527	-1.00311	0.199915	-5.01767	5.23017e-07	3.36673e-06	-1.14684	0.193278	-5.93362	2.96326e-09	3.23066e-08	1150.88	519.829	574.146
IGF2BP3	316.472	4.05962	0.60071	6.75804	1.3987e-11	2.05324e-10	4.47368	0.581224	7.69701	1.39285e-14	3.86755e-13	16.2493	360.319	270.397
IL6	757.334	-4.35059	0.568339	-7.65491	1.93442e-14	4.57205e-13	-3.21844	0.549461	-5.85745	4.70031e-09	4.91572e-08	5888.32	632.66	288.622
DGKB	39.5215	-4.19652	0.648208	-6.47402	9.54264e-11	1.22226e-09	-3.82125	0.62638	-6.10053	1.05714e-09	1.26083e-08	370.286	26.2065	20.1491
NACAD	190.449	-1.78606	0.369854	-4.82909	1.37157e-06	8.05651e-06	-1.55285	0.357539	-4.34317	1.40441e-05	7.03211e-05	539.404	183.784	156.379
TTYH3	6710.03	1.48771	0.171194	8.69019	3.61821e-18	1.47475e-16	1.54503	0.165526	9.33403	1.01917e-20	9.52987e-19	2402.66	7011.88	6738.81
CIDEB	16.3136	-1.06	0.354155	-2.99305	0.00276205	0.00713192	-1.0211	0.342108	-2.98474	0.00283817	0.00785843	32.0657	15.7418	15.3067
NKX2-8	43.9558	2.89381	0.696924	4.15225	3.29218e-05	0.000139477	2.73914	0.674693	4.05983	4.91081e-05	0.000217285	6.63809	44.1085	49.1031
NKX2-1	35.0031	6.05934	1.08837	5.56734	2.58662e-08	2.14014e-07	4.68462	1.05676	4.43299	9.29348e-06	4.82649e-05	2.65566	32.8766	150.803
ADAMTS7	1051.91	1.19037	0.286814	4.15032	3.32009e-05	0.000140537	1.3952	0.277326	5.03091	4.88158e-07	3.36241e-06	429.302	1129.26	979.821
ALPK3	487.796	-1.52555	0.305387	-4.99546	5.86952e-07	3.73858e-06	-1.23834	0.295238	-4.19439	2.73606e-05	0.000129065	1144.5	485.028	397.393
BRIP1	568.413	2.00678	0.238746	8.40552	4.25985e-17	1.48502e-15	1.99831	0.230932	8.65326	5.00501e-18	2.63714e-16	146.952	586.674	590.132
ACTL6A	3382.98	1.12924	0.135168	8.35436	6.57883e-17	2.22581e-15	1.13726	0.1307	8.70128	3.2815e-18	1.78185e-16	1579.05	3473.72	3454.52
TBR1	12.3049	2.88104	0.731953	3.9361	8.28181e-05	0.000320592	2.97525	0.710843	4.18552	2.84518e-05	0.000133504	1.6814	15.9194	12.3051
SCN7A	89.8414	-5.61199	0.633877	-8.85343	8.48717e-19	3.89912e-17	-3.62634	0.612207	-5.92339	3.15378e-09	3.41362e-08	789.259	64.0008	16.147
IL36G	64.3329	3.58282	0.688814	5.20144	1.97754e-07	1.38291e-06	3.26327	0.666925	4.89301	9.93066e-07	6.4579e-06	17.7318	124.088	274.874
IL1RN	5182.98	-1.20386	0.36963	-3.25693	0.00112622	0.00324865	-1.4927	0.357374	-4.17685	2.95569e-05	0.000138224	12665.7	4500.75	5498.34
IL36RN	226.097	3.06444	0.678905	4.5138	6.36758e-06	3.21545e-05	2.21736	0.656559	3.37725	0.000732148	0.00239132	87.4548	186.726	418.323
BIN1	1638.64	-2.54782	0.34085	-7.47488	7.72735e-14	1.64996e-12	-2.05166	0.329539	-6.22586	4.78927e-10	6.12674e-09	6495.12	1566.66	1110.73
GYPC	771.891	-2.52213	0.367789	-6.85754	7.00582e-12	1.07725e-10	-1.94084	0.355572	-5.45834	4.80599e-08	4.06699e-07	2906.73	757.172	506.064
KLF4	2527.69	-2.39361	0.305709	-7.8297	4.89023e-15	1.26741e-13	-2.4649	0.295569	-8.33949	7.46143e-17	3.09673e-15	11460	2075.85	2180.89
TMOD1	228.92	-4.38353	0.422822	-10.3673	3.49117e-25	4.25968e-23	-3.3579	0.408656	-8.21693	2.08786e-16	8.03416e-15	1877.54	183.083	89.9287
ANGPTL2	2575.79	-2.24033	0.333832	-6.71095	1.93365e-11	2.7863e-10	-1.32506	0.322755	-4.10547	4.03491e-05	0.000182495	7033.67	2807.31	1488.51
ALDOB	18.9788	1.73242	0.620043	2.79404	0.00520547	0.012411	1.46178	0.600354	2.43487	0.0148971	0.0334801	6.7222	46.964	44.5332
BAAT	9.29629	3.34136	0.697128	4.79304	1.64274e-06	9.49754e-06	2.3762	0.678451	3.50239	0.000461101	0.00159279	1.47803	15.8916	163.931
KIF12	147.967	2.7508	0.558415	4.92608	8.38952e-07	5.16511e-06	2.6657	0.540203	4.93463	8.03012e-07	5.31286e-06	23.5038	149.356	158.333
GARNL3	274.421	-1.49106	0.280777	-5.31047	1.0934e-07	8.0474e-07	-1.84258	0.271456	-6.78777	1.13884e-11	1.95969e-10	817.559	227.908	290.873
GABBR2	1060.26	2.18403	0.683216	3.19669	0.00139013	0.00390092	2.84381	0.660592	4.30494	1.67033e-05	8.24742e-05	174.96	1256.54	795.338
CTSV	856.406	1.94177	0.469362	4.13704	3.51815e-05	0.000148054	2.40225	0.453837	5.29321	1.2019e-07	9.39791e-07	185.043	978.275	1142.45
LMX1B	42.7669	2.52792	0.708776	3.5666	0.000361648	0.00118407	3.35829	0.686248	4.8937	9.89587e-07	6.43742e-06	5.15624	52.1497	29.2955
DSCC1	496.162	1.39016	0.227115	6.12097	9.3005e-10	1.00492e-08	1.5154	0.219655	6.89899	5.23743e-12	9.56834e-11	183.683	524.423	480.892
MYC	5568.71	-1.76089	0.337458	-5.21811	1.80758e-07	1.27447e-06	-1.64432	0.326268	-5.03979	4.66054e-07	3.21469e-06	16308.7	5217.14	4812.17
IL33	1034.5	-1.5582	0.513339	-3.03543	0.00240195	0.00632198	-1.54263	0.496315	-3.10818	0.00188246	0.00549803	2797.03	960.117	949.781
IL11RA	428.905	-1.31733	0.227588	-5.78821	7.11404e-09	6.53657e-08	-1.24559	0.220018	-5.66132	1.50212e-08	1.42541e-07	972.827	410.3	390.189
RNF38	1578.64	-1.15933	0.144524	-8.02171	1.04285e-15	2.978e-14	-1.10547	0.139723	-7.91184	2.53621e-15	8.02231e-14	3266.16	1517.27	1461.66
TLN1	16030.2	-2.28692	0.1803	-12.6839	7.25844e-37	5.24562e-34	-2.0223	0.174321	-11.601	4.07114e-31	2.65276e-28	60140.5	14804.1	12323.2
DNAJB5	723.565	-3.25992	0.313309	-10.4048	2.35686e-25	2.99226e-23	-2.74683	0.302888	-9.06877	1.20371e-19	8.55639e-18	4196.28	625.103	437.957
ALDH1B1	2959.38	-3.02754	0.26686	-11.345	7.84816e-30	1.91515e-27	-2.49404	0.258004	-9.6667	4.17637e-22	5.47917e-20	15041.9	2669.99	1844.58
ARHGEF39	524.989	1.73678	0.212447	8.17513	2.95537e-16	9.20919e-15	1.64325	0.205499	7.99639	1.28125e-15	4.27404e-14	169.925	529.853	565.439
KIF13A	2821.38	-1.23897	0.191774	-6.46054	1.04329e-10	1.32456e-09	-1.26744	0.185413	-6.83575	8.15762e-12	1.44837e-10	6335.28	2631.36	2683.7
PIM1	9458.07	-1.07816	0.253214	-4.25789	2.06361e-05	9.2081e-05	-1.09288	0.244818	-4.46405	8.04239e-06	4.24752e-05	19140.2	8973.55	9065.63
TFAP2A	2324.44	1.26245	0.338181	3.73306	0.000189167	0.000664632	1.37198	0.326977	4.19595	2.71726e-05	0.000128302	946.192	2449.33	2270.31
IRF4	187.4	-1.28483	0.435605	-2.94954	0.00318252	0.00807775	-1.33226	0.42114	-3.16345	0.00155909	0.00465086	439.02	174.417	180.212
HMGA1	17699.9	1.04844	0.239635	4.37517	1.21338e-05	5.71268e-05	1.19909	0.231691	5.17538	2.27442e-07	1.67839e-06	8169.65	18757.5	16897.6
TCF19	2232.69	1.44074	0.252952	5.6957	1.22868e-08	1.07581e-07	1.48086	0.24458	6.0547	1.40681e-09	1.63401e-08	832.261	2322.63	2258.97
IER3	4637.24	-2.69852	0.304375	-8.86578	7.59676e-19	3.5072e-17	-2.36677	0.29428	-8.04259	8.79591e-16	3.09249e-14	21348.2	4139	3288.72
C6orf52	53.4954	1.54927	0.343452	4.51089	6.45564e-06	3.25554e-05	1.53764	0.332557	4.62369	3.76976e-06	2.14843e-05	18.8503	54.9034	55.4806
FGFBP2	16.9548	-1.4412	0.541041	-2.66375	0.00772746	0.0176277	-1.20418	0.522757	-2.30351	0.02125	0.0455178	38.8753	53.5012	19.5472
CPEB2	672.998	-1.77631	0.226454	-7.84403	4.36328e-15	1.13554e-13	-1.9305	0.218933	-8.81778	1.16747e-18	6.85336e-17	2213.14	580.43	645.911
MGARP	13.1794	-2.79207	0.369285	-7.56073	4.00802e-14	9.01924e-13	-2.18302	0.355579	-6.13934	8.28627e-10	1.00671e-08	57.2771	12.5998	8.18184
RAB30	479.603	-1.57599	0.235549	-6.69073	2.22056e-11	3.15616e-10	-1.56588	0.227717	-6.8764	6.13854e-12	1.11107e-10	1307.6	441.58	438.458
PI15	263.492	-2.2842	0.442973	-5.15652	2.51579e-07	1.72462e-06	-1.69173	0.428233	-3.95049	7.79924e-05	0.000330142	859.297	266	176.422
GGH	2252.05	1.1078	0.275683	4.01839	5.85979e-05	0.000235218	1.43351	0.266553	5.37796	7.53366e-08	6.12086e-07	915.957	3263.56	1974.42
NEK1	571.141	-1.30204	0.149245	-8.72418	2.68106e-18	1.11454e-16	-1.18545	0.144268	-8.21696	2.08719e-16	8.03416e-15	1258.54	553.062	510.098
MMP27	1.24035	-4.44692	0.834966	-5.32586	1.00474e-07	7.44737e-07	-4.39401	0.800583	-5.48852	4.0532e-08	3.48578e-07	13.5492	0.694536	0.616759
SLC37A4	1597.95	1.35692	0.166517	8.14885	3.6741e-16	1.12804e-14	1.25324	0.161025	7.78294	7.0858e-15	2.07355e-13	671.404	1601.43	1720.78
FXYD6	1025.05	-4.26567	0.431547	-9.8846	4.85498e-23	4.25904e-21	-3.14295	0.417206	-7.53334	4.94601e-14	1.24594e-12	7694.24	871.04	399.959
ARHGAP20	93.1844	-3.79772	0.378089	-10.0445	9.71353e-24	9.55587e-22	-3.09174	0.365274	-8.46415	2.58021e-17	1.18957e-15	656.132	76.9503	47.1272
MMP13	1354	3.87887	0.62022	6.25402	4.00012e-10	4.57192e-09	3.87048	0.599727	6.45374	1.09125e-10	1.58247e-09	147.732	2674.83	1677.51
CASP5	16.8185	2.33964	0.552356	4.23575	2.27793e-05	0.000100688	2.27439	0.535929	4.24382	2.19743e-05	0.000105876	3.52552	17.2673	18.055
UNC13C	61.966	3.3819	0.890927	3.79593	0.000147088	0.000530986	4.11076	0.862448	4.76639	1.87557e-06	1.1411e-05	10.1845	122.072	43.6481
THBS1	19914.7	-3.43718	0.350525	-9.80582	1.06278e-22	8.8361e-21	-2.59911	0.338902	-7.66921	1.73061e-14	4.73414e-13	111116	18338.7	10258.4
NUSAP1	2510.96	1.81611	0.238636	7.61037	2.73307e-14	6.27038e-13	1.86334	0.230744	8.07536	6.72802e-16	2.39619e-14	720.661	2621.31	2536.92
KIF23	1565.2	1.75323	0.227142	7.71865	1.17567e-14	2.8578e-13	1.83551	0.219643	8.35681	6.44382e-17	2.73834e-15	461.264	1644.96	1553.81
KNL1	890.731	1.63977	0.237281	6.91067	4.82377e-12	7.58483e-11	1.67233	0.229462	7.28804	3.14507e-13	6.90785e-12	290.246	924.367	903.771
ITPKA	85.6735	1.03393	0.384627	2.68815	0.00718498	0.0165413	1.48365	0.372035	3.98793	6.66517e-05	0.000286921	34.7033	142.799	70.8563
SLC28A2	23.0602	1.63109	0.581762	2.80371	0.00505181	0.0120919	2.46847	0.563389	4.38147	1.1788e-05	5.99615e-05	39.8986	218.722	27.1713
GCOM1	63.2235	-1.28667	0.387956	-3.31654	0.000911392	0.00269644	-1.60024	0.37506	-4.26661	1.98464e-05	9.6555e-05	163.715	53.9819	67.1311
TTLL7	439.473	-2.60078	0.339624	-7.6578	1.89143e-14	4.4817e-13	-2.21651	0.328327	-6.75094	1.46894e-11	2.48184e-10	1880.64	404.52	309.93
IFI44L	2209.66	1.58324	0.435157	3.63833	0.00027441	0.000926869	1.44497	0.420739	3.43437	0.000593932	0.00198567	812.253	2211.71	2434.14
IFI44	2381.05	1.63557	0.367165	4.4546	8.405e-06	4.11276e-05	1.3827	0.355002	3.89489	9.82418e-05	0.000403962	888.312	2316.7	2760.52
DNASE2B	5.60531	1.99302	0.603003	3.30515	0.000949247	0.00279523	2.17451	0.587087	3.70391	0.000212303	0.000803817	1.26589	6.02861	5.33561
CGREF1	446.51	1.60762	0.46031	3.49246	0.000478584	0.00152056	2.89323	0.445118	6.49992	8.03606e-11	1.19459e-09	77.295	574.16	235.499
LHCGR	2.048	-2.26728	0.733182	-3.09239	0.00198552	0.00534038	-1.63993	0.704646	-2.32731	0.0199485	0.0430602	6.521	2.07932	4.29357
CYP1B1	1428.12	-1.5769	0.529304	-2.9792	0.00289005	0.00742162	-1.57324	0.511752	-3.07422	0.00211056	0.00607081	3922.31	1318.18	1314.82
SLC5A6	3754.79	1.53965	0.21659	7.1086	1.17222e-12	2.03379e-11	1.86925	0.209421	8.9258	4.42472e-19	2.80826e-17	1132.5	4137.88	3292.8
ABCG5	8.69364	1.28524	0.445169	2.88707	0.00388843	0.00963011	1.13121	0.432175	2.61747	0.00885833	0.0214125	3.88397	8.62792	9.51377
EMILIN1	4830.08	-2.90979	0.380369	-7.6499	2.01142e-14	4.73024e-13	-1.64037	0.367752	-4.46053	8.17568e-06	4.31358e-05	16566.3	5314.08	2204.39
SIX3	126.604	2.21187	0.675727	3.27332	0.00106293	0.00308931	1.83559	0.653497	2.80887	0.00497153	0.0128993	33.5285	119.935	155.708
CENPO	753.51	1.35875	0.171173	7.93787	2.05688e-15	5.63393e-14	1.40929	0.165557	8.5124	1.70377e-17	8.1831e-16	294.423	781.772	754.791
TRIM54	29.1091	1.30106	0.577875	2.25146	0.0243565	0.0477075	1.61439	0.559151	2.88722	0.00388665	0.0103566	10.4114	39.2932	25.9117
CYP2C9	52.6531	3.88828	0.737377	5.27313	1.3412e-07	9.67414e-07	1.92866	0.714	2.7012	0.00690891	0.0172045	6.39126	98.0484	94.1974
MFSD13A	495.834	1.2062	0.192791	6.2565	3.93703e-10	4.51077e-09	1.35057	0.186467	7.24294	4.39067e-13	9.42138e-12	206.183	525.549	475.64
CYP2C8	43.5627	2.01947	0.49187	4.10569	4.0311e-05	0.000167836	1.25853	0.476141	2.64318	0.00821319	0.0200489	14.8947	35.8416	60.7067
CH25H	228.992	-3.73573	0.384506	-9.71565	2.586e-22	1.97524e-20	-3.0924	0.371653	-8.32066	8.74782e-17	3.59249e-15	1600.58	187.707	120.193
KIF11	1953.85	1.51978	0.220397	6.89564	5.36213e-12	8.38223e-11	1.67413	0.213111	7.85567	3.97652e-15	1.20891e-13	651.833	2079.06	1868.16
TACC2	2815.36	-1.86309	0.230945	-8.06726	7.18904e-16	2.11396e-14	-2.00705	0.223285	-8.98874	2.50075e-19	1.66842e-17	9687.84	2410.04	2662.96
DUSP5	4532.15	-2.32261	0.332018	-6.99544	2.64426e-12	4.33936e-11	-2.18479	0.321007	-6.80604	1.00323e-11	1.74476e-10	18269.8	4018.49	3652.38
CEP55	1637.77	1.65868	0.246714	6.72308	1.77926e-11	2.57568e-10	1.78597	0.23856	7.48646	7.07563e-14	1.74639e-12	504.254	1737.59	1590.92
KIF20B	862.283	1.03573	0.205981	5.0283	4.94849e-07	3.19856e-06	1.2134	0.199181	6.09195	1.11547e-09	1.32313e-08	395.425	916.186	810.088
ENTPD1	2300.95	-1.71472	0.193738	-8.8507	8.69747e-19	3.98553e-17	-1.292	0.187305	-6.89785	5.27952e-12	9.62724e-11	5727.6	2338.86	1744.82
ZNF365	288.75	1.40793	0.470463	2.99265	0.0027657	0.00714036	1.76361	0.454926	3.8767	0.000105883	0.000432559	94.7528	321.956	251.601
OIT3	11.0623	1.28956	0.459499	2.80645	0.00500907	0.0120064	1.63882	0.445659	3.67731	0.00023571	0.000882525	3.88912	12.2714	9.69486
DNA2	446.392	1.66526	0.186761	8.91653	4.81146e-19	2.30044e-17	1.6278	0.18069	9.0088	2.08318e-19	1.40421e-17	147.208	455.011	467.017
AOX1	230.831	-4.09341	0.505751	-8.09373	5.78661e-16	1.72436e-14	-3.41214	0.488893	-6.97933	2.96601e-12	5.68373e-11	1877.6	176.415	109.956
CDK15	18.4372	-2.39267	0.335183	-7.13839	9.44301e-13	1.66761e-11	-1.69477	0.322939	-5.24796	1.5379e-07	1.17479e-06	60.9707	18.8787	11.6332
CHRNA1	48.8489	3.03218	0.522	5.80876	6.29363e-09	5.83123e-08	4.44138	0.507041	8.7594	1.96284e-18	1.09005e-16	2.92921	64.251	24.1627
GUCA1C	4.44413	-8.12687	1.49916	-5.42095	5.92842e-08	4.5993e-07	-7.0032	1.44319	-4.85257	1.21871e-06	7.74996e-06	146.012	1.6183	0.320819
CILP	1208.14	-4.562	0.608255	-7.50014	6.37508e-14	1.37846e-12	-2.77766	0.588057	-4.72346	2.3187e-06	1.384e-05	7992.04	1165.51	338.309
HCN4	12.4932	1.76835	0.684819	2.58221	0.00981693	0.0216844	1.86174	0.663428	2.80624	0.00501239	0.0129915	3.64397	13.2337	12.412
ARHGAP24	327.559	-2.33211	0.293727	-7.93973	2.02628e-15	5.55822e-14	-1.84672	0.283929	-6.50416	7.81283e-11	1.16318e-09	1152.04	320.221	228.692
ZGRF1	347.347	1.43319	0.198693	7.21308	5.47015e-13	1.01766e-11	1.34416	0.192223	6.99274	2.69562e-12	5.18131e-11	137.62	349.181	371.308
GPAT3	196.615	-2.0777	0.396145	-5.24481	1.56446e-07	1.11645e-06	-1.79241	0.382955	-4.68047	2.86222e-06	1.67517e-05	648.264	187.122	153.512
FGF2	283.253	-3.01284	0.415238	-7.2557	3.99589e-13	7.56884e-12	-2.75527	0.401424	-6.86373	6.70875e-12	1.20869e-10	1590.92	235.616	197.008
MMRN1	183.752	-3.41408	0.476531	-7.16444	7.81043e-13	1.40708e-11	-2.95192	0.460648	-6.40819	1.47256e-10	2.06941e-09	1169.9	151.192	109.762
PDE5A	811.683	-3.11063	0.285635	-10.8902	1.28319e-27	2.23251e-25	-2.49364	0.276132	-9.03061	1.70711e-19	1.17917e-17	4175.83	741.318	483.357
PRDM5	124.611	-1.69974	0.342894	-4.95706	7.15688e-07	4.47513e-06	-1.24676	0.331418	-3.76189	0.000168633	0.000654186	304.039	128.053	93.4608
TRPC3	40.6872	-3.14328	0.411853	-7.63204	2.31074e-14	5.37362e-13	-2.72304	0.397803	-6.84521	7.63639e-12	1.36201e-10	230.166	34.8377	25.9954
CXCL9	2948.79	2.16261	0.573777	3.76908	0.000163851	0.000585539	2.45619	0.554763	4.42746	9.53505e-06	4.94538e-05	595.53	3268.53	2666.71
FRAS1	925.711	1.68481	0.428999	3.9273	8.59037e-05	0.000330968	1.50567	0.414801	3.62985	0.000283583	0.0010385	318.008	903.265	1022.66
SHROOM3	1329.86	-1.42038	0.332048	-4.27763	1.88894e-05	8.49932e-05	-1.2392	0.321033	-3.86005	0.000113364	0.000459865	3073.26	1301.74	1148.08
CENPE	1159.6	1.74831	0.228929	7.63691	2.2249e-14	5.18682e-13	1.80355	0.221381	8.14683	3.73586e-16	1.37272e-14	346.818	1209.77	1164.33
CASP6	1241.38	1.09689	0.153709	7.13613	9.59921e-13	1.69361e-11	1.00723	0.148643	6.77619	1.23389e-11	2.10655e-10	618.359	1243.25	1323.06
MTTP	19.0203	-3.4252	0.478178	-7.16302	7.89213e-13	1.42043e-11	-2.91469	0.46148	-6.31597	2.68477e-10	3.60453e-09	120.216	15.9152	11.1226
FBN2	1460.17	2.75265	0.53406	5.1542	2.54714e-07	1.74483e-06	3.1576	0.516392	6.11473	9.6719e-10	1.1592e-08	185.687	1984.24	1251.91
KIAA1644	305.169	-4.94982	0.471956	-10.4879	9.82174e-26	1.29056e-23	-4.14285	0.456205	-9.08112	1.07462e-19	7.86766e-18	3359.65	190.174	108.689
GABARAPL1	2638.14	-1.38243	0.190616	-7.25244	4.09322e-13	7.72981e-12	-1.11159	0.184289	-6.03175	1.62198e-09	1.86618e-08	5695.96	2636	2184.78
SLCO1C1	11.3391	-1.09412	0.344235	-3.1784	0.0014809	0.00412969	-1.0186	0.33232	-3.06513	0.00217572	0.00623165	22.3657	11.0706	10.4465
CLSTN3	4321.28	1.29683	0.19789	6.55327	5.6292e-11	7.51227e-10	1.12014	0.191338	5.85426	4.79129e-09	5.00054e-08	1948.5	4236.3	4788.22
AMIGO2	5534.83	1.34506	0.320996	4.19028	2.78613e-05	0.000119962	1.14646	0.310358	3.69398	0.000220768	0.000832077	2450.4	5424.34	6224.9
COL2A1	48.1072	5.16525	0.631763	8.17593	2.93583e-16	9.1635e-15	3.32241	0.613511	5.41541	6.11497e-08	5.05435e-07	2.69305	55.6501	545.255
PPFIA2	28.5079	-2.223	0.468053	-4.74946	2.03964e-06	1.15645e-05	-1.46371	0.452003	-3.23827	0.00120256	0.00370256	83.1859	30.1266	17.6859
PHLDA1	6990.21	-1.5555	0.321774	-4.83412	1.33734e-06	7.86744e-06	-1.59534	0.311105	-5.12797	2.92884e-07	2.11343e-06	19209.4	6357.36	6535.3
LGR5	135.545	3.37357	0.641384	5.25983	1.44189e-07	1.03448e-06	2.87978	0.620517	4.64094	3.46832e-06	1.9935e-05	16.7591	123.474	173.866
TMEM132B	29.2854	-1.51229	0.427272	-3.5394	0.00040104	0.00129945	-1.01366	0.412748	-2.45589	0.0140537	0.0318112	62.2801	30.7413	21.8036
PDX1	54.0281	3.19083	0.730693	4.36686	1.26046e-05	5.90772e-05	3.80978	0.70764	5.38379	7.29354e-08	5.94306e-07	4.50082	63.6802	41.4702
SLC39A5	17.779	1.46145	0.426909	3.42333	0.000618585	0.00191455	2.05305	0.413966	4.95946	7.06906e-07	4.70982e-06	4.90457	66.024	116.84
TARBP2	1808.95	1.25222	0.138921	9.01386	1.98932e-19	1.00482e-17	1.03046	0.134343	7.67039	1.71478e-14	4.70132e-13	859.361	1756.06	2047.83
RDH16	150.004	2.1065	0.422896	4.98113	6.32153e-07	3.99132e-06	2.08916	0.40911	5.10658	3.28039e-07	2.33436e-06	36.4154	155.196	156.946
DHH	13.906	-1.72265	0.358582	-4.80406	1.55481e-06	9.02811e-06	-1.25426	0.345754	-3.62762	0.000286046	0.00104712	33.9757	14.2903	10.356
GPR84	86.1392	1.09924	0.400658	2.74358	0.00607724	0.0142472	1.57457	0.387541	4.06296	4.8454e-05	0.000214828	32.827	97.8967	70.4306
BRCA2	622.857	1.60037	0.22373	7.15313	8.48243e-13	1.51219e-11	1.69568	0.216382	7.83653	4.6318e-15	1.39296e-13	202.838	656.657	614.661
GALNT6	1430.34	1.90423	0.331937	5.73671	9.65359e-09	8.67484e-08	2.02024	0.320959	6.29439	3.08614e-10	4.09836e-09	375.624	1523.89	1406.2
MORN3	146.645	1.48864	0.381798	3.89903	9.65779e-05	0.000366458	1.7329	0.369299	4.69241	2.70001e-06	1.58832e-05	47.9015	159.383	134.584
ZIC5	63.9667	4.59199	0.786256	5.84032	5.21007e-09	4.90221e-08	4.92227	0.762464	6.45574	1.07693e-10	1.56287e-09	2.41435	71.9142	57.1799
SSTR1	48.5042	-2.27286	0.581588	-3.90802	9.30545e-05	0.000354376	-2.37413	0.562207	-4.22287	2.41212e-05	0.000115033	209.025	40.2753	43.194
CDH24	807.093	1.45933	0.233792	6.24199	4.32043e-10	4.9141e-09	1.44904	0.226085	6.40928	1.46208e-10	2.05986e-09	303.349	828.303	834.201
NOVA1	99.3882	-2.86576	0.471126	-6.0828	1.18103e-09	1.25506e-08	-2.73465	0.455407	-6.00485	1.91513e-09	2.169e-08	541.894	81.4095	74.3141
PELI2	421.161	-2.45595	0.331187	-7.41561	1.21067e-13	2.49984e-12	-2.31408	0.320177	-7.2275	4.91973e-13	1.05015e-11	1831.98	368.342	333.842
SYT16	161.065	1.92612	0.500262	3.85021	0.000118016	0.000437124	1.7583	0.483832	3.63412	0.00027893	0.00102453	46.6962	158.454	178.014
RDH12	80.4473	1.27561	0.496727	2.56802	0.010228	0.0224541	1.15824	0.480431	2.41083	0.0159161	0.0354643	530.592	80.5584	122.255
JDP2	1178.29	-1.57637	0.250444	-6.2943	3.08791e-10	3.59714e-09	-1.17621	0.242127	-4.85781	1.18688e-06	7.56726e-06	2724.52	1205.78	913.709
FAM181A	11.7109	2.94277	0.781435	3.76586	0.000165979	0.00059258	2.38691	0.758192	3.14815	0.00164305	0.00487381	8.45966	18.2124	18.9916
SLC24A4	16.261	-1.38809	0.315239	-4.40329	1.06622e-05	5.09649e-05	-1.37236	0.304361	-4.50901	6.5132e-06	3.51518e-05	39.4593	15.286	15.0873
FBLN5	1252.78	-2.88671	0.327161	-8.82352	1.10919e-18	4.97415e-17	-2.26303	0.316296	-7.15479	8.38036e-13	1.72441e-11	5691.79	1185.87	769.613
SERPINA10	4.98197	3.58539	0.84732	4.23145	2.32187e-05	0.000102341	3.18466	0.826762	3.85197	0.000117172	0.000472749	0.473614	16.3615	6.21167
WARS	14989	1.52087	0.393509	3.86489	0.000111141	0.00041501	1.41378	0.380464	3.71594	0.000202451	0.000769943	5669.34	15105.2	16269
FGF7	613.782	-3.52527	0.507962	-6.94002	3.92045e-12	6.26939e-11	-2.22976	0.491077	-4.54056	5.61044e-06	3.07465e-05	2948.35	628.584	256.057
HDC	76.9394	-2.89443	0.422552	-6.84987	7.39178e-12	1.13381e-10	-2.19099	0.408298	-5.36616	8.0432e-08	6.5132e-07	338.853	74.2981	45.6231
GCNT3	289.245	-2.79604	0.605348	-4.61889	3.85793e-06	2.04776e-05	-2.40295	0.585244	-4.10589	4.02764e-05	0.000182209	1373.14	364.664	197.719
DISP2	236.547	1.15926	0.403113	2.87578	0.00403035	0.00992533	1.45401	0.389813	3.73002	0.000191467	0.000731871	94.5237	259.235	211.174
TPM1	14017.1	-4.09869	0.300379	-13.6451	2.15962e-42	5.79702e-39	-3.24863	0.290417	-11.1861	4.77032e-29	2.02718e-26	107679	11329.1	6284.79
ARRDC4	954.145	-1.34611	0.265809	-5.06421	4.10089e-07	2.69143e-06	-1.51452	0.25699	-5.8933	3.7855e-09	4.04145e-08	2433.44	851.669	957.115
PIF1	469.188	2.0051	0.229077	8.75295	2.07847e-18	8.8159e-17	1.85857	0.221606	8.38681	4.99501e-17	2.16023e-15	129.304	468.263	518.356
CYP11A1	231.078	1.81815	0.582101	3.12343	0.00178759	0.00488209	2.44269	0.562906	4.33942	1.42859e-05	7.14038e-05	49.6123	369.375	213.614
CYP1A1	4798.99	2.46317	0.963943	2.55531	0.0106093	0.0232072	2.62108	0.931988	2.81236	0.004918	0.0127723	1147.64	8029.48	10256.2
CYP1A2	113.517	5.05478	1.08633	4.65308	3.27007e-06	1.76463e-05	4.18104	1.05111	3.97775	6.95705e-05	0.000298172	22.8067	524.259	1391.3
RLBP1	7.61671	2.07837	0.796672	2.60881	0.0090858	0.0202897	3.31531	0.774031	4.28318	1.84245e-05	9.0221e-05	0.95173	14.0177	7.52989
FANCI	2528.27	1.49386	0.178464	8.37064	5.73044e-17	1.95417e-15	1.56664	0.172567	9.07848	1.101e-19	7.98144e-18	893.697	2646.85	2516.62
WDR93	23.9873	1.67161	0.352848	4.7375	2.16372e-06	1.22018e-05	1.70058	0.342336	4.96757	6.77986e-07	4.53103e-06	7.5605	24.9675	24.4053
TICRR	593.418	1.83942	0.219179	8.39231	4.76701e-17	1.64353e-15	1.80278	0.212004	8.50355	1.83887e-17	8.68265e-16	174.117	607.104	622.693
NTRK3	74.7014	-4.8035	0.505351	-9.50529	1.99487e-21	1.32699e-19	-3.62069	0.488129	-7.41749	1.19364e-13	2.83172e-12	693.015	56.3739	24.8342
ST8SIA2	29.0692	2.03864	0.622337	3.27578	0.00105372	0.00306446	2.5134	0.602604	4.1709	3.03399e-05	0.00014148	5.79904	49.161	23.9207
TGFB1I1	1904.52	-2.89134	0.291702	-9.91197	3.69305e-23	3.27323e-21	-2.0894	0.282015	-7.40883	1.27414e-13	2.99632e-12	8027.93	1886.39	1081.92
MARVELD3	1060	1.34684	0.263686	5.10773	3.26044e-07	2.18565e-06	1.3413	0.25497	5.26062	1.43574e-07	1.10365e-06	429.03	1087.75	1091.98
CLEC18B	15.8168	1.39032	0.403998	3.44141	0.000578686	0.00180085	1.24269	0.391784	3.17188	0.00151453	0.00453802	15.2086	35.9326	17.3751
NUDT7	67.16	-1.36646	0.305532	-4.4724	7.73469e-06	3.81456e-05	-1.12236	0.295252	-3.80135	0.000143909	0.000568079	146.376	67.1544	56.6823
MYOCD	469.363	-5.34984	0.511457	-10.46	1.31851e-25	1.70861e-23	-4.63706	0.494431	-9.37858	6.68678e-21	6.63519e-19	6022.46	242.043	147.659
LRRC46	80.679	1.78015	0.236339	7.53219	4.98968e-14	1.10042e-12	1.80707	0.229092	7.88797	3.07136e-15	9.49982e-14	23.9269	83.816	82.2526
ABCA8	255.741	-3.34976	0.472145	-7.09476	1.29579e-12	2.22559e-11	-3.46486	0.456459	-7.59073	3.181e-14	8.29095e-13	1922.73	174.21	188.561
IMPA2	1858.71	-1.30661	0.296825	-4.40197	1.07272e-05	5.11974e-05	-1.16094	0.286979	-4.04538	5.22376e-05	0.00022978	4064.84	1817.7	1643.15
GNAL	392.961	-3.14682	0.326093	-9.65007	4.91229e-22	3.56378e-20	-2.8451	0.315235	-9.02534	1.79133e-19	1.22437e-17	2327.91	323.904	262.79
ASXL3	57.241	-1.92756	0.494811	-3.89554	9.79784e-05	0.000370873	-2.31306	0.478362	-4.83538	1.32893e-06	8.37455e-06	222.254	44.654	58.2706
ADCYAP1	57.9031	-3.20028	0.523339	-6.11511	9.64877e-10	1.03957e-08	-2.65564	0.505741	-5.251	1.51279e-07	1.15697e-06	321.403	51.0844	34.9555
OSBPL1A	1442.64	-1.35075	0.238933	-5.65327	1.57421e-08	1.3581e-07	-1.21007	0.231004	-5.23833	1.62037e-07	1.23297e-06	3246.63	1403.19	1272.79
GATA6	365.055	-3.40793	0.364201	-9.35727	8.18267e-21	4.91222e-19	-2.64885	0.352056	-7.52393	5.31527e-14	1.33723e-12	2074.55	330.838	195.4
GREB1L	101.3	2.64478	0.547358	4.8319	1.35237e-06	7.95087e-06	2.78262	0.529652	5.25368	1.49087e-07	1.14333e-06	15.8344	130.005	98.8853
SLC13A5	24.0256	1.95272	0.528511	3.69476	0.000220092	0.000758953	2.03836	0.512034	3.98091	6.86524e-05	0.000294561	6.17887	49.9507	47.6708
TMC6	5514.58	1.44918	0.202339	7.16213	7.94352e-13	1.42831e-11	1.30546	0.195638	6.67281	2.50953e-11	4.09484e-10	2216.34	5478.71	6052.76
SLC16A3	8091.1	1.07777	0.282188	3.81934	0.000133811	0.000487459	1.26416	0.272835	4.63341	3.59691e-06	2.05832e-05	3606.14	8662.03	7612.2
CBX8	617.325	1.60682	0.182464	8.80623	1.29426e-18	5.72213e-17	1.55595	0.176499	8.81565	1.18997e-18	6.94375e-17	213.482	628.287	650.77
CEP131	1820.67	1.37855	0.194644	7.08245	1.41631e-12	2.41493e-11	1.27985	0.188212	6.80005	1.04583e-11	1.81079e-10	752.447	1827.27	1956.67
MAPK4	165.464	-2.91257	0.626544	-4.64863	3.34151e-06	1.80198e-05	-2.27444	0.605698	-3.75507	0.000173293	0.000669737	756.147	156.249	100.372
P3H4	2029.24	1.23858	0.235356	5.26259	1.42037e-07	1.01982e-06	1.60274	0.227568	7.04293	1.88234e-12	3.7018e-11	744.318	2260.65	1756.24
ERBB2	27583.1	1.13499	0.350179	3.24118	0.00119036	0.00341209	1.36834	0.338569	4.04153	5.31033e-05	0.000233273	11555.3	29833	29865.6
GRB7	4368.8	1.59924	0.338012	4.73132	2.2306e-06	1.25451e-05	1.61267	0.326812	4.93456	8.03328e-07	5.31286e-06	1475.33	4512.41	5278.73
MIEN1	3833.79	1.47437	0.24737	5.96019	2.51938e-09	2.50499e-08	1.15479	0.239177	4.82816	1.37798e-06	8.66131e-06	1636.42	3968.3	4547.03
PNMT	314.404	2.36323	0.5671	4.16721	3.08351e-05	0.000131411	2.9741	0.548429	5.42295	5.86242e-08	4.86205e-07	68.1283	840.611	282.106
CACNA1A	105.643	1.15113	0.37845	3.0417	0.00235247	0.00620565	1.21863	0.366055	3.32908	0.000871326	0.00279224	47.2607	110.231	195.877
NFIC	4125.83	-1.66623	0.186353	-8.94129	3.84657e-19	1.87732e-17	-1.32695	0.180169	-7.36502	1.77123e-13	4.05909e-12	10361.5	4130.02	3264.46
PGGHG	3048.61	1.8555	0.351629	5.27688	1.31405e-07	9.48561e-07	1.56183	0.339981	4.59388	4.35071e-06	2.4432e-05	1841.75	3784.22	3579.18
HUNK	251.514	-1.94972	0.454618	-4.2887	1.79721e-05	8.12942e-05	-1.03918	0.439479	-2.36457	0.0180509	0.0395228	573.341	278.896	148.32
COL6A2	34303.8	-2.28734	0.379208	-6.0319	1.62044e-09	1.67666e-08	-1.06816	0.366634	-2.91341	0.00357499	0.00962191	82869.4	39522.6	16975.9
SIK1	370.698	-2.07601	0.569768	-3.6436	0.000268847	0.000910369	-1.45505	0.550849	-2.64147	0.00825466	0.020135	1052.01	383.742	249.546
TRPM2	1092.95	1.3034	0.32335	4.03091	5.55614e-05	0.000224275	1.52378	0.312651	4.87374	1.09507e-06	7.04394e-06	409.961	1178.95	1011.94
TM4SF5	3.97673	3.25817	0.83245	3.91395	9.07982e-05	0.000346768	2.54111	0.812275	3.12839	0.00175766	0.00517452	0.565978	5.26333	5.67174
FAM71E1	129.772	1.23124	0.296346	4.15474	3.25665e-05	0.000138132	1.02952	0.286693	3.59104	0.000329363	0.00118658	61.8891	126.803	145.793
CTU1	269.59	1.34096	0.206518	6.49318	8.40442e-11	1.0906e-09	1.2131	0.199803	6.07149	1.26729e-09	1.48163e-08	115.781	268.61	293.473
CFAP74	34.5567	1.69211	0.469135	3.60687	0.000309907	0.00103423	2.22279	0.454314	4.89264	9.94917e-07	6.46666e-06	8.38493	39.5382	27.3868
FHAD1	250.107	1.71055	0.368024	4.64794	3.35263e-06	1.80659e-05	1.22253	0.35593	3.43477	0.000593067	0.00198379	97.5326	227.778	319.405
EPHA2	8479.52	-1.33534	0.290611	-4.59494	4.3288e-06	2.26695e-05	-1.23166	0.280975	-4.38351	1.16781e-05	5.94642e-05	19213.2	8181.62	7614.31
MYOM3	81.88	1.82376	0.42811	4.26003	2.04399e-05	9.1314e-05	2.28264	0.414294	5.5097	3.59452e-08	3.13546e-07	19.186	93.3059	87.9421
CNKSR1	2348.76	1.49829	0.239605	6.25315	4.02268e-10	4.59211e-09	1.11937	0.231676	4.83159	1.35444e-06	8.52157e-06	1008.11	2191.09	2849.26
IL22RA1	325.984	1.1857	0.361728	3.27788	0.00104588	0.0030459	1.12149	0.349788	3.2062	0.00134499	0.00407879	151.621	329.612	344.617
DMRTA2	149.54	4.2243	0.61515	6.8671	6.55198e-12	1.01243e-10	3.35847	0.595364	5.64104	1.69029e-08	1.59085e-07	11.8394	121.955	222.252
PLK4	675.839	1.70877	0.1944	8.78995	1.49628e-18	6.48208e-17	1.77045	0.188037	9.41547	4.70984e-21	4.7952e-19	207.203	706.577	677.004
HSPG2	9845.73	-2.47663	0.269593	-9.18654	4.05668e-20	2.24414e-18	-2.01707	0.260652	-7.73853	1.00576e-14	2.87016e-13	38013.9	9391.51	6829.55
BCL10	1389.36	-1.04249	0.157905	-6.602	4.05636e-11	5.55532e-10	-1.12863	0.152664	-7.3929	1.43657e-13	3.34311e-12	2828.23	1293.76	1373.39
CYR61	10386.6	-3.62899	0.348924	-10.4005	2.46594e-25	3.07941e-23	-2.75236	0.337353	-8.15868	3.38696e-16	1.25394e-14	63015.5	9352.07	5093.42
PRKACB	2068.25	-1.33681	0.217572	-6.14421	8.0363e-10	8.7335e-09	-1.16833	0.210353	-5.55413	2.78998e-08	2.48694e-07	4558.57	2028	1804.47
TINAGL1	20959.2	1.75245	0.328407	5.33621	9.49083e-08	7.07389e-07	1.69813	0.31752	5.34808	8.88909e-08	7.14196e-07	6576.57	21339.5	22158.4
KIF2C	2231.92	2.28622	0.228717	9.99588	1.58877e-23	1.49265e-21	2.37453	0.221169	10.7363	6.87702e-27	2.00645e-24	454.645	2357.12	2217.18
BEST4	56.3325	1.06935	0.318062	3.36207	0.000773596	0.00232909	1.08599	0.307825	3.52794	0.000418815	0.001464	27.1901	57.9296	57.2455
SYPL2	68.2924	-3.45011	0.405107	-8.51654	1.64384e-17	6.0093e-16	-2.38044	0.391253	-6.08414	1.17118e-09	1.38166e-08	348.656	66.8544	31.8518
RXRG	13.6305	-3.91751	0.594017	-6.59495	4.25391e-11	5.81316e-10	-3.34799	0.573186	-5.84102	5.18819e-09	5.36324e-08	106.164	10.4888	7.03567
UCK2	2503.88	1.04359	0.186176	5.60537	2.07811e-08	1.75574e-07	1.09968	0.180015	6.10884	1.00358e-09	1.19914e-08	1211.58	2596.42	2497.45
XCL1	125.185	1.43259	0.422944	3.38718	0.000706153	0.00215016	1.65885	0.409081	4.05506	5.01212e-05	0.000221467	42.5442	134.401	114.953
DPT	794.872	-4.99892	0.607005	-8.23538	1.78994e-16	5.74922e-15	-3.02502	0.586821	-5.15493	2.53724e-07	1.85344e-06	5975.81	734.211	186.864
NECTIN4	10857.1	1.17002	0.350659	3.33662	0.000848051	0.00252374	1.04283	0.339035	3.07587	0.00209889	0.00604614	5225.2	10765.6	11757.9
NUF2	1103.1	2.54931	0.267057	9.54594	1.34873e-21	9.24914e-20	2.53668	0.258276	9.82156	9.09223e-23	1.37779e-20	196.941	1142.01	1152.17
RGS5	5361.12	-2.50415	0.347272	-7.21093	5.55724e-13	1.03182e-11	-2.57471	0.335756	-7.66838	1.74183e-14	4.75549e-13	25898.4	4347.21	4565.09
PFDN2	4283.43	1.1058	0.207585	5.32698	9.98607e-08	7.41361e-07	1.15344	0.200709	5.74683	9.0931e-09	8.99555e-08	1997.04	4442.4	4298.29
TOR1AIP1	2563.23	-1.21569	0.127039	-9.56938	1.07548e-21	7.51236e-20	-1.18737	0.122821	-9.66746	4.14554e-22	5.47548e-20	5558.07	2439.97	2392.5
RGL1	876.412	-1.3891	0.261774	-5.3065	1.1175e-07	8.20288e-07	-1.18538	0.253082	-4.6838	2.81608e-06	1.65113e-05	1964.99	864.024	750.147
LHX9	18.4213	2.8646	0.649204	4.41248	1.02195e-05	4.90234e-05	3.07756	0.630144	4.88391	1.04005e-06	6.72537e-06	2.43312	26.7726	20.4597
ECM1	2212.69	-2.16818	0.361899	-5.9911	2.08423e-09	2.1169e-08	-1.47068	0.349892	-4.20325	2.63114e-05	0.000124476	6400.16	2309.31	1804.39
SYT14	95.5066	1.41945	0.597197	2.37685	0.017461	0.0358242	1.98906	0.577555	3.44394	0.000573306	0.00192428	27.5228	109.483	99.3761
DTL	929.105	1.58898	0.235168	6.75678	1.41096e-11	2.06962e-10	1.81652	0.227417	7.98761	1.37577e-15	4.58152e-14	286.237	1007.09	860.14
DYRK3	223.427	-1.33853	0.24641	-5.43214	5.56829e-08	4.33962e-07	-1.0941	0.238185	-4.59348	4.35922e-06	2.44727e-05	476.641	223.345	188.508
SMYD2	2384.42	1.00018	0.158102	6.3262	2.51276e-10	2.98286e-09	1.1335	0.152874	7.4146	1.21991e-13	2.88006e-12	1145.27	2513.33	2291.38
ATP8B2	1005.39	-2.0266	0.31157	-6.50447	7.79668e-11	1.01877e-09	-1.35591	0.30122	-4.5014	6.75075e-06	3.62737e-05	2707.22	1057.57	664.301
S100A8	23698.3	3.61806	0.666634	5.42735	5.71961e-08	4.45016e-07	4.1854	0.644536	6.49367	8.37706e-11	1.24057e-09	72237.9	32836.1	24311.8
NUP210L	7.20888	-1.54331	0.308031	-5.01023	5.43638e-07	3.48871e-06	-1.29001	0.296291	-4.35386	1.33761e-05	6.72522e-05	17.2023	7.12382	5.9494
S100A7	3621.98	2.29653	0.861719	2.66506	0.0076974	0.0175676	3.29061	0.833157	3.94957	7.82918e-05	0.000331194	1525.34	8809.57	4270.29
CREB3L4	1062.8	1.04595	0.216184	4.83821	1.31016e-06	7.72033e-06	1.01406	0.209041	4.85103	1.22824e-06	7.80293e-06	534.888	1080.64	1104.84
KCNN3	195.95	-2.29516	0.331581	-6.92186	4.45746e-12	7.05014e-11	-1.7473	0.320495	-5.45187	4.98442e-08	4.18897e-07	655.386	195.206	133.554
PKLR	5.30254	2.66662	0.65547	4.06826	4.73656e-05	0.000194196	2.20667	0.63946	3.45083	0.000558867	0.00187969	1.04059	10.3034	6.73962
HCN3	496.558	1.69848	0.233116	7.28596	3.19379e-13	6.16765e-12	1.485	0.225475	6.58609	4.51555e-11	7.02787e-10	173.629	486.245	563.791
ACTA1	47.475	-2.70215	0.390752	-6.91525	4.67028e-12	7.34963e-11	-2.12691	0.377429	-5.63526	1.74792e-08	1.64113e-07	198.449	45.4333	30.3653
MAP3K21	371.466	1.1902	0.288617	4.12381	3.72663e-05	0.000155989	1.15675	0.279107	4.14449	3.40576e-05	0.00015676	169.447	378.174	387.104
ITPKB	2041.01	-2.16343	0.174865	-12.372	3.70417e-35	1.97199e-32	-2.16759	0.169059	-12.8215	1.24263e-37	2.69899e-34	7920.98	1762.87	1767.99
CDC42BPA	2322.24	-1.81994	0.201569	-9.02888	1.73435e-19	8.78393e-18	-1.6018	0.194878	-8.21951	2.04339e-16	7.8941e-15	6741.83	2220.84	1909.19
C1orf35	1471.33	1.12503	0.145931	7.70929	1.2652e-14	3.05176e-13	1.04181	0.141121	7.38241	1.55453e-13	3.59802e-12	717.344	1477.03	1564.84
WNT9A	414.039	-1.79581	0.341525	-5.2582	1.45473e-07	1.0429e-06	-1.39419	0.33017	-4.22265	2.41446e-05	0.000115089	1094.71	416.567	315.324
PPFIA4	191.225	2.56735	0.382755	6.70755	1.97922e-11	2.84107e-10	2.25198	0.37034	6.08083	1.1956e-09	1.40793e-08	38.0039	181.327	225.602
RHOB	12726.3	-2.2518	0.236905	-9.5051	1.9986e-21	1.32699e-19	-2.18244	0.229049	-9.52826	1.59934e-21	1.87209e-19	50381.9	11099.3	10578.3
MEIS1	991.639	-1.8744	0.23461	-7.98946	1.35532e-15	3.81233e-14	-1.76385	0.226817	-7.77654	7.45326e-15	2.17133e-13	3102.88	913.612	846.184
ANKRD53	27.7435	-1.87026	0.2961	-6.3163	2.67907e-10	3.15979e-09	-1.42922	0.285701	-5.00251	5.65881e-07	3.84626e-06	75.3814	28.0012	20.5303
NAT8	11.3324	2.8071	0.582028	4.82297	1.41436e-06	8.29198e-06	1.84938	0.56576	3.26885	0.00107986	0.00336509	2.45199	9.02017	17.5528
DQX1	390.103	1.52197	0.407151	3.7381	0.000185416	0.000653898	1.01213	0.393705	2.57077	0.0101472	0.0240156	174.302	351.637	500.677
MALL	373.898	-1.96095	0.452226	-4.33621	1.44962e-05	6.7007e-05	-1.37991	0.437199	-3.15625	0.00159814	0.00475428	1008.28	387.401	258.986
NT5DC4	18.4224	2.66572	0.393202	6.77951	1.2058e-11	1.78542e-10	2.53452	0.383201	6.61408	3.73868e-11	5.91771e-10	3.19131	18.5314	20.3507
CNGA3	9.2894	-3.80004	0.567582	-6.69513	2.15475e-11	3.07423e-10	-4.03108	0.548018	-7.35575	1.89859e-13	4.31555e-12	87.9398	5.34816	6.28666
LYG1	57.4691	1.4605	0.27507	5.30956	1.09888e-07	8.0814e-07	1.07991	0.266458	4.05285	5.05972e-05	0.000223267	25.4309	53.8198	70.1013
AFF3	200.494	-4.73778	0.485714	-9.75426	1.76893e-22	1.37918e-20	-3.55769	0.469433	-7.57869	3.49069e-14	9.03789e-13	1812.27	153.927	67.8918
GPR17	14.0037	-2.88572	0.40607	-7.10646	1.19056e-12	2.05991e-11	-2.30699	0.391358	-5.89482	3.75089e-09	4.00669e-08	64.7411	13.0805	8.77169
TMEFF2	14.5101	-3.19699	0.69809	-4.57963	4.65808e-06	2.42385e-05	-1.91828	0.673682	-2.84745	0.00440707	0.0115734	58.6014	24.2305	15.7118
CDCA7	1079.18	1.76193	0.292462	6.02449	1.69644e-09	1.7524e-08	1.9005	0.282802	6.72025	1.8141e-11	3.03094e-10	307.964	1149.68	1044.4
DLX1	29.9762	2.20987	0.568766	3.88538	0.000102171	0.000384804	2.18757	0.550854	3.97123	7.15035e-05	0.000305853	6.82426	37.3931	38.111
GULP1	346.179	-2.43605	0.339845	-7.16813	7.60288e-13	1.37232e-11	-1.57742	0.328508	-4.80178	1.57264e-06	9.74701e-06	1092.81	366.148	201.896
CCDC150	163.048	2.10437	0.253218	8.31049	9.53057e-17	3.16955e-15	2.23516	0.245198	9.11574	7.81384e-20	5.89749e-18	37.06	173.867	158.784
UNC80	18.5644	-1.40267	0.597103	-2.34912	0.0188177	0.0381634	-1.33375	0.577086	-2.31118	0.0208231	0.0447405	44.4743	17.5774	16.7413
PTH2R	179.915	2.77194	0.733678	3.77815	0.000157998	0.000566778	2.48126	0.709533	3.49704	0.000470451	0.00162222	30.7896	172.323	210.792
ABCA12	478.034	1.32572	0.521858	2.54038	0.0110732	0.024076	1.35218	0.504586	2.67979	0.00736694	0.0182151	193.564	493.917	484.926
HES6	406.497	1.2367	0.317749	3.89208	9.93876e-05	0.000375753	1.41173	0.307266	4.59449	4.33814e-06	2.43824e-05	163.337	773.256	571.799
CPNE9	11.3853	1.27751	0.386168	3.30817	0.000939084	0.00276834	1.20875	0.374898	3.2242	0.00126324	0.00386202	4.88646	11.5401	12.0598
FANCD2	1467.24	1.6071	0.193125	8.32153	8.6837e-17	2.89817e-15	1.70702	0.186757	9.14031	6.2275e-20	4.75528e-18	473.54	1546.5	1442.97
2018-03-04	61.6007	4.07156	0.646745	6.29547	3.06477e-10	3.57461e-09	5.55204	0.628894	8.82826	1.0632e-18	6.31716e-17	1.66584	116.443	54.8683
CNTN4	98.2111	-2.36568	0.382503	-6.18472	6.22126e-10	6.88847e-09	-2.1108	0.3697	-5.7095	1.13312e-08	1.10475e-07	387.586	89.7259	75.1901
RBMS3	378.943	-2.82039	0.331597	-8.50549	1.80824e-17	6.57194e-16	-2.14832	0.320542	-6.70214	2.05386e-11	3.40244e-10	1625.44	366.64	230.089
OSBPL10	1283.17	-2.40835	0.244479	-9.85094	6.79076e-23	5.79992e-21	-1.87936	0.236354	-7.95145	1.84342e-15	6.01589e-14	4625.24	1257.03	871.076
ACKR2	625.626	1.97221	0.537501	3.66923	0.000243282	0.00083021	2.87081	0.519734	5.52362	3.32088e-08	2.92023e-07	104.712	765.469	410.651
CSRNP1	2378.91	-2.94996	0.238469	-12.3704	3.77816e-35	1.97199e-32	-2.71477	0.230553	-11.775	5.24901e-32	4.10431e-29	12996	1979.7	1681.91
ITGA9	545.411	-2.30292	0.292643	-7.86939	3.56383e-15	9.40512e-14	-2.39404	0.282923	-8.4618	2.63275e-17	1.20527e-15	2376.8	452.139	481.59
STAC	106.088	-1.99034	0.476718	-4.1751	2.97853e-05	0.000127487	-2.07463	0.460862	-4.50163	6.74344e-06	3.62543e-05	386.44	91.6907	97.1562
CAND2	242.857	-1.72269	0.382599	-4.50261	6.71245e-06	3.37328e-05	-1.41099	0.369872	-3.81481	0.00013629	0.000541833	639.591	240.378	193.615
IL17RD	478.777	-2.11726	0.326736	-6.48003	9.17014e-11	1.17938e-09	-1.333	0.315858	-4.22026	2.44019e-05	0.000116202	1289.63	511.832	297.124
LRIG1	1118.54	-1.93675	0.374575	-5.17051	2.33454e-07	1.60858e-06	-1.06425	0.362139	-2.9388	0.00329485	0.00896408	2588.07	1237.54	675.943
NFKBIZ	1788.4	-1.47823	0.27272	-5.42033	5.94886e-08	4.61135e-07	-1.54862	0.263674	-5.87324	4.27369e-09	4.51335e-08	4746.32	1622.39	1703.47
PHLDB2	2389.85	-1.34953	0.285538	-4.72627	2.28687e-06	1.28346e-05	-1.23498	0.276067	-4.47346	7.69631e-06	4.08166e-05	5434.4	2308.72	2132.42
TAGLN3	26.9828	2.71636	0.639127	4.25011	2.13663e-05	9.5023e-05	2.02959	0.619102	3.27828	0.00104442	0.00326976	5.66233	66.4955	48.644
BOC	638.471	-3.33573	0.42195	-7.90551	2.66837e-15	7.17292e-14	-2.24	0.407918	-5.4913	3.9898e-08	3.44034e-07	3025.86	640.582	299.653
TMEM108	162	-2.53097	0.482342	-5.24725	1.54388e-07	1.1026e-06	-2.50856	0.466303	-5.37967	7.46234e-08	6.07302e-07	768.435	134.994	132.877
AGTR1	104.89	-3.95417	0.534065	-7.40392	1.32226e-13	2.72425e-12	-3.2058	0.516169	-6.21076	5.27302e-10	6.67598e-09	782.669	84.8738	50.442
TRPC1	217.84	-1.8999	0.273512	-6.94632	3.74929e-12	6.02645e-11	-1.33275	0.264352	-5.04159	4.61685e-07	3.18897e-06	568.668	225.669	152.202
LPP	7904.38	-3.12417	0.230765	-13.5383	9.29109e-42	1.7458e-38	-2.82235	0.223111	-12.65	1.11936e-36	1.98921e-33	46155.3	6525.32	5293.45
TMEM44	1027.38	1.21056	0.189621	6.38409	1.72417e-10	2.10644e-09	1.23414	0.183368	6.73042	1.69172e-11	2.84105e-10	449.369	1057.68	1040.57
UCN2	168.521	2.28206	0.423219	5.39215	6.96204e-08	5.33076e-07	2.6267	0.409461	6.41502	1.40806e-10	1.99599e-09	30.4738	188.112	148.148
STXBP5L	51.6861	-1.54509	0.642524	-2.40472	0.0161847	0.0335109	-1.98059	0.621201	-3.18832	0.00143103	0.00431161	165.286	41.8187	56.5791
TM4SF19	81.8531	3.24137	0.59629	5.4359	5.45194e-08	4.2654e-07	4.11829	0.577636	7.12956	1.00693e-12	2.05679e-11	5.90864	100.708	72.1768
SLIT2	401.452	-3.57733	0.437506	-8.17664	2.91866e-16	9.12506e-15	-2.56853	0.422935	-6.0731	1.25462e-09	1.46771e-08	2248.07	378.986	188.24
AHSG	10.5881	5.69963	1.15683	4.92694	8.35263e-07	5.14577e-06	4.98742	1.12478	4.43413	9.24453e-06	4.80489e-05	0.190221	16.5364	40.5051
ECE2	769.88	1.61192	0.204488	7.88273	3.20317e-15	8.52515e-14	1.70934	0.19777	8.64304	5.47368e-18	2.85332e-16	248.466	813.162	760.056
EPHA5	9.11613	-2.54781	0.745026	-3.41977	0.000626747	0.00193726	-2.59003	0.719831	-3.59811	0.000320537	0.00115949	44.7772	7.44067	7.59178
OCIAD2	3773.2	1.42213	0.189981	7.48564	7.1201e-14	1.52899e-12	1.11826	0.183693	6.08766	1.14574e-09	1.3541e-08	1656.22	3596.32	4439.5
SLC10A4	45.9888	1.445	0.546713	2.64306	0.00821604	0.0186066	2.54688	0.52901	4.81443	1.47622e-06	9.20187e-06	9.88009	57.9044	35.0861
GC	25.3369	7.26268	1.58341	4.58673	4.50253e-06	2.35072e-05	8.29525	1.53534	5.40289	6.55775e-08	5.39297e-07	0.092018	222.741	28.7777
SNCA	184.039	-1.1493	0.401094	-2.8654	0.00416479	0.0102122	-1.06845	0.387768	-2.75539	0.00586215	0.0148649	374.68	178.67	168.863
ANK2	371.363	-3.57172	0.47354	-7.54259	4.60733e-14	1.0221e-12	-2.80237	0.457785	-6.12158	9.26495e-10	1.11522e-08	2279.85	326.921	191.655
CCNA2	1701.53	1.74762	0.237828	7.34825	2.00816e-13	3.98031e-12	1.82404	0.22997	7.93166	2.16237e-15	6.94088e-14	505.081	1787.42	1695.2
SETD7	2902.59	-1.55027	0.170166	-9.11032	8.21391e-20	4.34759e-18	-1.27131	0.164517	-7.72753	1.09657e-14	3.12019e-13	6966.76	2885.71	2378.33
GLRA3	29.4446	2.12985	0.564565	3.77255	0.000161588	0.00057855	1.87935	0.546704	3.4376	0.000586896	0.00196517	7.76001	28.7607	42.9369
ADAMTS16	188.028	-2.53979	0.505711	-5.02221	5.1079e-07	3.29706e-06	-1.36898	0.488833	-2.80051	0.00510216	0.0131945	543.176	210.323	93.3601
SRD5A1	1206.15	1.13807	0.248428	4.58108	4.62578e-06	2.40838e-05	1.15728	0.240211	4.81775	1.4519e-06	9.06763e-06	558.462	1245.08	1228.63
MYO10	3341.08	1.28584	0.295003	4.35875	1.30807e-05	6.10736e-05	1.474	0.285229	5.16777	2.36907e-07	1.741e-06	1289.05	3581.03	3143.17
SKP2	2259.26	1.80559	0.215374	8.38348	5.13853e-17	1.76514e-15	1.77877	0.208258	8.54121	1.32829e-17	6.44301e-16	674.65	2315.2	2358.64
PIK3R1	2536.61	-1.19256	0.246143	-4.84497	1.26632e-06	7.50132e-06	-1.12683	0.237979	-4.73498	2.19081e-06	1.31287e-05	5335	2442.76	2334.03
HAPLN1	198.572	2.33457	0.517179	4.51404	6.36038e-06	3.21354e-05	2.01624	0.500195	4.0309	5.5563e-05	0.000242986	47.0452	190.712	237.74
SSBP2	733.506	-1.64998	0.241562	-6.83044	8.46549e-12	1.28176e-10	-1.50053	0.233536	-6.42527	1.31639e-10	1.88105e-09	1979.39	699.385	630.579
CRHBP	9.73302	-2.9281	0.423119	-6.92027	4.50769e-12	7.11761e-11	-2.3732	0.407385	-5.82544	5.69619e-09	5.84204e-08	46.419	19.0286	6.11411
PAM	4065.85	-1.58776	0.240435	-6.6037	4.01016e-11	5.49605e-10	-1.08603	0.232459	-4.67193	2.98386e-06	1.73959e-05	9034.82	4255.81	3005.62
TSLP	102.66	-2.37999	0.375185	-6.3435	2.24598e-10	2.68973e-09	-2.06849	0.362619	-5.7043	1.1682e-08	1.13668e-07	399.309	95.1507	76.7272
C1QTNF2	75.7165	-2.4709	0.320367	-7.71271	1.23171e-14	2.98245e-13	-2.04682	0.309515	-6.613	3.76613e-11	5.95151e-10	296.16	71.7056	53.3822
SPINK7	26.1976	-2.1988	0.72573	-3.02978	0.00244732	0.00642698	-3.10585	0.701708	-4.42612	9.59423e-06	4.97343e-05	690.408	41.4239	57.7571
ZNF300	505.622	1.07959	0.389653	2.77066	0.00559431	0.0132389	1.04167	0.376763	2.76478	0.00569616	0.0145023	246.966	508.505	522.014
TENM2	796.265	2.55263	0.773846	3.29863	0.000971584	0.00284984	2.98603	0.748231	3.99079	6.58525e-05	0.000283856	114.692	908.632	814.336
KCNMB1	694.686	-4.67958	0.430394	-10.8728	1.55398e-27	2.65448e-25	-3.64889	0.416072	-8.76984	1.78926e-18	1.01381e-16	6448.12	514.066	251.601
FAM50B	259.111	-1.34375	0.379484	-3.54098	0.00039864	0.00129235	-1.14501	0.366873	-3.12099	0.00180243	0.00529036	566.719	256.238	223.244
MYLK4	223.505	1.5307	0.468541	3.26694	0.00108716	0.00315	1.50178	0.453092	3.3145	0.000918059	0.00292093	80.6091	335.349	303.797
TBC1D7	1015.48	1.18019	0.16078	7.34039	2.12978e-13	4.20363e-12	1.16829	0.155488	7.5137	5.74786e-14	1.43682e-12	459.942	1034.1	1042.57
PSD2	54.5982	2.13836	0.568544	3.76112	0.000169157	0.000602779	2.4581	0.550241	4.46731	7.92099e-06	4.19278e-05	19.7761	60.7741	65.2704
GFRA3	110.952	-2.55724	0.499938	-5.11511	3.13552e-07	2.11246e-06	-1.65028	0.483207	-3.41527	0.000637192	0.00211331	367.212	116.974	62.3438
PLA2G7	391.948	1.01903	0.347981	2.92842	0.0034069	0.00855595	1.269	0.336482	3.77139	0.00016234	0.000633165	175.07	422.164	355.012
RASGEF1C	13.9317	-3.15426	0.595372	-5.29797	1.171e-07	8.53702e-07	-1.39935	0.573525	-2.4399	0.0146912	0.0330741	43.1552	16.3523	4.83268
DAAM2	396.533	-2.77034	0.31648	-8.7536	2.06648e-18	8.78487e-17	-2.16939	0.305931	-7.09111	1.33043e-12	2.68115e-11	1701.77	378.258	249.329
MLIP	19.3666	-2.33939	0.557894	-4.19325	2.74986e-05	0.000118645	-1.99263	0.538934	-3.69736	0.000217855	0.000822765	72.6464	18.2428	14.2998
HMGCLL1	13.4898	-3.21679	0.561235	-5.73162	9.94762e-09	8.90499e-08	-2.94455	0.541849	-5.43427	5.5021e-08	4.59244e-07	83.4942	10.8877	8.9807
LGSN	28.5459	3.28548	0.921691	3.56462	0.000364382	0.00119156	3.73045	0.892946	4.17769	2.94484e-05	0.000137816	14.9821	31.4074	28.7784
SCUBE3	314.516	-2.73124	0.45253	-6.03548	1.58486e-09	1.64437e-08	-1.85267	0.437465	-4.23502	2.28532e-05	0.000109728	1168.7	323.738	175.897
ANO7	116.866	1.05472	0.253263	4.16454	3.11986e-05	0.00013281	1.4365	0.245049	5.86208	4.57105e-09	4.79629e-08	47.798	129.871	99.6797
PRSS35	28.4825	-3.0705	0.461379	-6.65505	2.83207e-11	3.96827e-10	-1.75343	0.445099	-3.93941	8.16839e-05	0.000343684	104.414	30.9869	12.4059
FAXC	236.295	-2.4149	0.361536	-6.67955	2.39679e-11	3.39636e-10	-2.00401	0.349486	-5.73416	9.79959e-09	9.64564e-08	900.677	224.423	168.773
PNRC1	3612.96	-1.57656	0.187587	-8.40443	4.29955e-17	1.49608e-15	-1.51285	0.181363	-8.34155	7.33249e-17	3.04969e-15	9668.27	3387.99	3241.57
RSPO3	165.547	-2.8553	0.557238	-5.12401	2.99097e-07	2.02232e-06	-2.07729	0.538673	-3.85631	0.00011511	0.000465297	691.865	163.939	95.5914
MTFR2	330.08	2.00803	0.221718	9.05667	1.34499e-19	6.88622e-18	2.06646	0.214559	9.6312	5.90367e-22	7.51561e-20	82.6154	345.826	332.116
SLC2A12	138.85	-1.51617	0.466421	-3.25065	0.00115142	0.00330966	-1.53842	0.450922	-3.41173	0.000645531	0.00213697	371.701	127.873	129.812
TIAM2	293.148	-1.29687	0.189919	-6.82854	8.57816e-12	1.29777e-10	-1.03903	0.183568	-5.66019	1.51207e-08	1.43416e-07	606.518	295.013	246.525
SLC22A3	237.324	-2.04667	0.504584	-4.05616	4.98869e-05	0.000203467	-1.39992	0.487803	-2.86984	0.00410673	0.0108808	654.726	248.079	158.469
VWDE	135.413	1.47757	0.534643	2.76365	0.00571584	0.0134959	1.80954	0.517042	3.4998	0.00046561	0.00160666	42.5905	149.613	118.841
CREB5	233.226	-2.57575	0.39871	-6.46022	1.04554e-10	1.32652e-09	-1.92649	0.385415	-4.99848	5.77832e-07	3.91524e-06	878.696	231.17	147.353
CDCA5	1992.86	1.79614	0.253232	7.09285	1.31376e-12	2.25439e-11	1.9672	0.24486	8.034	9.43473e-16	3.29929e-14	547.461	2139.72	1900.44
IGFBP3	55398.3	1.44028	0.395545	3.64124	0.000271327	0.00091761	1.5101	0.382432	3.94869	7.858e-05	0.000332126	20404.2	58117.8	55371.8
IGFBP1	17.5044	1.62327	0.590839	2.7474	0.00600696	0.0141106	2.38986	0.572383	4.17528	2.97625e-05	0.00013902	9.9067	28.6422	20.1538
SSC4D	87.3608	1.68665	0.309315	5.45287	4.95647e-08	3.9e-07	1.85787	0.299454	6.20417	5.49847e-10	6.92106e-09	26.0029	93.932	99.6736
TRIM50	3.27569	-1.53503	0.434922	-3.52943	0.00041645	0.00134267	-1.28612	0.418168	-3.0756	0.00210076	0.0060491	7.93484	3.24476	2.70797
ZNF92	504.813	1.29018	0.189624	6.80388	1.01837e-11	1.52716e-10	1.23817	0.183411	6.7508	1.47028e-11	2.48196e-10	216.717	511.48	530.188
STRA8	6.34021	2.81794	1.03142	2.7321	0.00629316	0.0147057	3.99158	1.00224	3.98266	6.81474e-05	0.00029265	0.532435	21.0132	29.1063
NCAPG2	1677.15	1.23637	0.209896	5.89038	3.85306e-09	3.69383e-08	1.39427	0.202956	6.86982	6.42847e-12	1.16033e-10	679.393	1785.24	1600.15
DENND2A	443.127	-2.27639	0.308813	-7.37143	1.68808e-13	3.39605e-12	-1.98288	0.29854	-6.64192	3.09628e-11	4.96523e-10	1635.94	413.823	337.658
TMEM47	2371.28	-1.25605	0.353903	-3.54913	0.000386507	0.00125822	-1.01297	0.342166	-2.96046	0.00307179	0.0084277	4815.89	2386.23	2016.24
SYTL5	537.939	1.56191	0.535608	2.91615	0.00354378	0.00885356	1.18425	0.517881	2.28672	0.0222124	0.0472838	218.819	497.479	646.332
CXorf36	569.057	-1.46914	0.257378	-5.7081	1.14244e-08	1.0073e-07	-1.23584	0.248823	-4.96675	6.80852e-07	4.54708e-06	1325.65	562.982	478.92
EBP	3448.26	1.00792	0.178815	5.63664	1.73403e-08	1.48102e-07	1.05637	0.172895	6.10991	9.96874e-10	1.19259e-08	1712.64	3561.96	3444.44
ITGB1BP2	85.1632	-2.90483	0.28207	-10.2983	7.17535e-25	8.27146e-23	-2.63169	0.272492	-9.65787	4.55215e-22	5.93236e-20	448.877	72.4252	59.9349
CXorf57	984.174	1.54246	0.39594	3.89569	9.79199e-05	0.000370726	1.16885	0.382835	3.05314	0.00226458	0.00645307	408.506	918.76	1190.33
HTR2C	97.4891	2.01015	0.593437	3.3873	0.000705833	0.00214953	2.18564	0.574015	3.80764	0.000140301	0.000555558	22.8552	104.119	92.1836
DOCK11	539.832	-1.93723	0.309678	-6.25563	3.95907e-10	4.5305e-09	-1.43075	0.299379	-4.77904	1.76131e-06	1.07796e-05	1485.05	550.772	387.642
MAGEA4	1176.92	5.41154	1.01593	5.32669	1.00017e-07	7.41936e-07	6.06641	0.982452	6.17477	6.62601e-10	8.19262e-09	58.2697	1400.15	1126.09
CSGALNACT1	616.252	-2.39417	0.243123	-9.84756	7.02309e-23	5.97121e-21	-2.01437	0.235027	-8.57078	1.02789e-17	5.07403e-16	2346.01	580.674	446.281
CHRNA6	5.07345	1.22135	0.501183	2.43694	0.0148123	0.0310801	1.34007	0.487129	2.75095	0.00594222	0.0150425	1.99058	6.09558	34.3924
SNTG1	113.883	2.05588	0.747502	2.75033	0.00595353	0.0139974	1.68573	0.722874	2.33198	0.0197016	0.0425743	33.4776	107.857	139.446
RGS20	167.036	2.72906	0.471818	5.78414	7.28859e-09	6.68714e-08	3.09919	0.456539	6.78845	1.13345e-11	1.95213e-10	21.998	188.27	145.618
TACC1	5863.44	-1.89587	0.287252	-6.60003	4.11072e-11	5.62567e-10	-1.55211	0.277725	-5.58864	2.2886e-08	2.08761e-07	16840.4	5742.69	4525.1
GINS4	382.452	1.39718	0.247559	5.6438	1.66333e-08	1.42843e-07	1.52795	0.239436	6.38147	1.75393e-10	2.43162e-09	140.61	405.156	370.045
CRH	1884.21	3.40789	1.06669	3.19484	0.0013991	0.00392316	2.69056	1.03134	2.6088	0.00908591	0.0218792	728.089	1628.03	4021.38
ADHFE1	187.698	-1.0208	0.372069	-2.74359	0.00607713	0.0142472	-1.53922	0.359736	-4.27874	1.87955e-05	9.18994e-05	446.544	153.594	220.04
PMP2	14.0895	-4.43491	0.637542	-6.95627	3.49411e-12	5.64041e-11	-4.04905	0.615353	-6.58004	4.70314e-11	7.29658e-10	143.948	8.7153	6.6545
ATP6V0D2	24.1819	2.22314	0.466186	4.76877	1.85353e-06	1.0586e-05	2.51342	0.452311	5.55684	2.74703e-08	2.45313e-07	4.64419	55.4943	21.9165
SYBU	198.964	-1.05896	0.442271	-2.39438	0.0166486	0.0343728	-1.0705	0.42759	-2.50357	0.0122947	0.0283148	399.017	189.998	191.521
RSPO2	50.9776	-3.4918	0.729294	-4.78791	1.68528e-06	9.7196e-06	-2.38392	0.704789	-3.38247	0.000718381	0.00235028	261.523	50.116	23.229
FAM135B	10.6311	-3.75599	0.682505	-5.50324	3.72876e-08	3.00572e-07	-4.5099	0.659777	-6.8355	8.17212e-12	1.44962e-10	111.205	4.89105	8.22344
ARHGAP39	808.457	1.72518	0.169325	10.1886	2.23005e-24	2.38083e-22	1.67861	0.163789	10.2486	1.2007e-24	2.63722e-22	257.275	824.304	851.407
SLC39A4	2418.52	1.95567	0.259488	7.53664	4.8223e-14	1.06718e-12	2.05198	0.250906	8.17825	2.87997e-16	1.08265e-14	615.85	2554.45	2389.41
VLDLR	882.524	-1.53306	0.301167	-5.0904	3.57309e-07	2.37322e-06	-1.29084	0.291169	-4.43329	9.28054e-06	4.82233e-05	2128	869.58	735.141
NFIB	1929.53	-1.64791	0.269281	-6.11968	9.37626e-10	1.01195e-08	-1.51233	0.260347	-5.80888	6.28913e-09	6.40312e-08	5232.3	1834.05	1669.45
CDKN2A	2971.65	3.93675	0.572974	6.87074	6.38712e-12	9.89398e-11	4.1051	0.554017	7.40971	1.26573e-13	2.98102e-12	187.668	3230.87	2875.04
UGCG	3524.56	-1.49345	0.195877	-7.62447	2.45046e-14	5.64958e-13	-1.50568	0.189379	-7.95062	1.85581e-15	6.04623e-14	9227.63	3249.73	3277.39
STOM	7651.74	-1.44191	0.297846	-4.84111	1.29116e-06	7.62684e-06	-1.16674	0.28797	-4.0516	5.08691e-05	0.000224315	17211	7666.24	6335.03
GSN	23009.5	-2.70313	0.240208	-11.2533	2.2317e-29	4.9921e-27	-2.32265	0.232243	-10.001	1.50919e-23	2.65781e-21	104237	20836.9	16006.6
CRB2	12.1793	-1.74382	0.466139	-3.74099	0.000183298	0.000647279	-2.14986	0.450512	-4.77204	1.82368e-06	1.11195e-05	43.0731	9.77624	12.8368
SLC25A25	1161.16	-2.90935	0.219665	-13.2445	4.85572e-40	6.0826e-37	-2.65706	0.212361	-12.512	6.42051e-36	8.96486e-33	6179.85	979.788	822.552
HMCN2	280.796	-4.12348	0.419882	-9.82058	9.18107e-23	7.66721e-21	-3.52259	0.405876	-8.67899	3.99301e-18	2.1385e-16	2377.54	206.856	136.377
CACNA1B	27.1855	1.81399	0.689588	2.63054	0.00852497	0.0192021	2.41105	0.667457	3.61229	0.000303506	0.00110421	5.94624	55.1331	36.2997
NACC2	1374.1	-2.65984	0.227406	-11.6964	1.32956e-31	4.16374e-29	-2.48761	0.219852	-11.3149	1.10736e-29	5.41167e-27	6595.88	1175.98	1043.59
PROSER2	1146.04	1.636	0.308305	5.30644	1.11787e-07	8.20288e-07	1.7255	0.298112	5.7881	7.11879e-09	7.16571e-08	365.05	1208.04	1135.32
ST8SIA6	8.04021	-2.08279	0.513285	-4.05776	4.95462e-05	0.000202262	-1.36519	0.494666	-2.75982	0.00578324	0.0146953	21.8683	8.54952	5.09622
ZEB1	1061.2	-3.53527	0.298449	-11.8455	2.27128e-32	8.05232e-30	-2.81689	0.288524	-9.76311	1.62107e-22	2.3473e-20	6536.3	927.563	563.746
FAM13C	72.7279	-1.34234	0.351949	-3.81402	0.000136725	0.000497109	-1.41639	0.340211	-4.16328	3.1371e-05	0.000145801	178.295	66.7904	70.309
A1CF	8.94804	2.17084	0.712595	3.04639	0.00231609	0.00611913	2.7432	0.692485	3.96139	7.45137e-05	0.000317133	1.28271	33.8861	44.4203
HABP2	29.8011	5.00993	0.783711	6.39258	1.63114e-10	2.00846e-09	3.18139	0.761547	4.17754	2.94684e-05	0.000137877	1.55168	30.3399	63.709
VAX1	15.3354	3.90557	1.01097	3.86319	0.000111917	0.000417329	4.39334	0.982091	4.47346	7.69643e-06	4.08166e-05	0.824115	17.7208	19.9955
NPFFR1	18.1235	-1.58744	0.432027	-3.6744	0.000238413	0.000814653	-1.09181	0.417117	-2.61752	0.00885711	0.0214122	40.2684	18.9193	13.4427
MKI67	5971.03	1.83209	0.248089	7.38483	1.52653e-13	3.09088e-12	2.00919	0.239872	8.37608	5.47186e-17	2.33546e-15	1589.05	6395.91	5657.14
INA	2095.95	1.97344	0.576691	3.422	0.000621619	0.00192299	2.15724	0.557583	3.86891	0.000109321	0.000445211	506.607	2260.14	1989.79
MTG1	495.688	1.44678	0.18623	7.76875	7.92614e-15	1.98048e-13	1.2217	0.180143	6.7818	1.18688e-11	2.03518e-10	206.395	481.915	563.33
ITPRIP	2299.32	-1.60459	0.240907	-6.66064	2.7264e-11	3.82878e-10	-1.16356	0.232911	-4.99571	5.86191e-07	3.96912e-06	5310.79	2370.86	1746.41
SAA4	8.28488	3.48324	0.810332	4.29854	1.71927e-05	7.80504e-05	3.01829	0.788828	3.8263	0.000130082	0.000519371	0.976571	7.70957	10.6429
ZNF215	130.616	1.06361	0.343049	3.10044	0.00193231	0.00521967	1.00949	0.331799	3.04247	0.00234646	0.0066621	65.7705	132.649	137.66
PAMR1	519.832	-2.80764	0.314685	-8.92205	4.57722e-19	2.19964e-17	-2.88727	0.304231	-9.49039	2.30177e-21	2.55654e-19	2959.27	400.01	422.698
SLC43A1	416.483	-1.38191	0.30751	-4.49389	6.99351e-06	3.49768e-05	-1.01893	0.297286	-3.42744	0.000609304	0.0020315	867.733	428.267	332.989
KLHL35	141.862	1.86305	0.344027	5.41542	6.11464e-08	4.72949e-07	2.27434	0.332898	6.83193	8.37815e-12	1.48348e-10	33.0274	160.352	120.558
ZC3H12C	610.78	-1.10251	0.23997	-4.59437	4.34057e-06	2.27058e-05	-1.23982	0.232006	-5.34391	9.09627e-08	7.29643e-07	1323.98	560.518	616.473
NCAM1	745.807	-4.9049	0.572977	-8.56037	1.12506e-17	4.21111e-16	-3.32649	0.553928	-6.00528	1.90999e-09	2.16568e-08	6278.71	625.873	209.554
ADAM33	380.658	-3.91844	0.433237	-9.04456	1.5027e-19	7.63127e-18	-2.90359	0.418797	-6.93318	4.11486e-12	7.67531e-11	2524.81	337.454	166.946
TMC2	5.83326	-1.90164	0.403974	-4.70733	2.50982e-06	1.39443e-05	-1.59473	0.388821	-4.10146	4.10558e-05	0.000185434	17.2258	5.66016	4.57073
ZP1	40.1013	2.1052	0.511425	4.11634	3.84937e-05	0.000160875	1.87852	0.495164	3.79374	0.000148396	0.000583154	10.5659	46.7577	45.6391
MS4A2	68.4363	-2.68694	0.41583	-6.46164	1.03576e-10	1.31589e-09	-2.30476	0.401843	-5.73547	9.72447e-09	9.58135e-08	307.142	62.2028	47.6843
CHEK1	1133.77	1.43702	0.191656	7.49792	6.4837e-14	1.40033e-12	1.53501	0.18534	8.28213	1.20989e-16	4.79734e-15	412.148	1194	1115.57
KIRREL3	34.9566	-1.02066	0.398751	-2.55964	0.0104781	0.0229414	-1.24905	0.385477	-3.24028	0.00119414	0.0036807	74.7566	31.4679	36.7599
SCN2B	17.6631	-2.934	0.589003	-4.9813	6.31576e-07	3.98901e-06	-2.93033	0.569086	-5.14918	2.61624e-07	1.90687e-06	104.403	13.7413	13.5861
TAGLN	24444.8	-4.32171	0.416744	-10.3702	3.38901e-25	4.16206e-23	-2.9817	0.402926	-7.40012	1.36059e-13	3.17763e-12	173107	21914.6	8656.59
JPH2	833.212	-4.27087	0.449213	-9.50744	1.95407e-21	1.30666e-19	-3.29572	0.434284	-7.58885	3.22747e-14	8.38971e-13	6615.99	673.738	342.713
C20orf144	19.7871	1.94939	0.263737	7.39143	1.45261e-13	2.95715e-12	2.07896	0.257446	8.07533	6.72964e-16	2.39619e-14	4.94352	21.1622	19.2479
KIAA1755	214.264	-2.31273	0.432984	-5.34138	9.2242e-08	6.89156e-07	-1.08945	0.418515	-2.60313	0.00923781	0.0221883	524.67	246.545	105.592
DSN1	1414.95	1.1247	0.161123	6.98037	2.94412e-12	4.79377e-11	1.21631	0.155807	7.80647	5.88102e-15	1.74714e-13	638.031	1482.7	1391.34
CDC42EP2	901.598	-1.36309	0.264585	-5.1518	2.57996e-07	1.76539e-06	-1.13883	0.255801	-4.45202	8.50674e-06	4.47256e-05	1969.47	894.458	765.627
FAM57B	15.9562	1.86798	0.461037	4.05168	5.0851e-05	0.000206867	2.33811	0.447584	5.22383	1.75257e-07	1.32531e-06	3.60814	52.2393	28.7275
DOC2A	73.0099	1.91618	0.500608	3.82771	0.000129339	0.000473	2.1236	0.484377	4.38418	1.16421e-05	5.92964e-05	18.1511	106.469	87.8624
HMGA2	870.419	5.28156	0.732797	7.20739	5.70325e-13	1.05476e-11	6.0511	0.708873	8.53622	1.38682e-17	6.71029e-16	15.9162	1056.52	797.305
CNKSR2	32.9464	-1.60482	0.568512	-2.82284	0.00476003	0.011483	-1.90436	0.549597	-3.46502	0.000530196	0.00179499	103.913	27.6942	34.082
CNTN5	27.8172	2.233	0.703272	3.17516	0.00149752	0.00416927	1.99773	0.680751	2.9346	0.00333976	0.00906745	6.82305	57.7237	32.1856
MKX	78.2274	-3.53065	0.529967	-6.66201	2.701e-11	3.79878e-10	-3.08499	0.512215	-6.02283	1.71389e-09	1.96269e-08	532.94	62.7799	45.9848
MPP7	1260.55	-1.36893	0.284036	-4.81957	1.4387e-06	8.41109e-06	-1.3416	0.274613	-4.88543	1.03204e-06	6.67804e-06	3004.35	1185.36	1163.13
FXYD4	481.818	2.63159	0.730945	3.60025	0.000317906	0.00105819	3.17473	0.706792	4.49174	7.06433e-06	3.77305e-05	62.0275	902.258	530.754
FCGR1A	183.173	1.29319	0.422008	3.06437	0.0021813	0.00580219	1.95172	0.408116	4.78226	1.73336e-06	1.06185e-05	55.6903	215.667	136.614
ARID5B	3252.14	-2.13221	0.212957	-10.0124	1.34437e-23	1.28227e-21	-2.01959	0.205891	-9.80903	1.02955e-22	1.53632e-20	11841.4	2920.4	2700.99
LATS2	1017.93	-1.99013	0.210104	-9.47213	2.74189e-21	1.76439e-19	-1.57931	0.203116	-7.77543	7.51924e-15	2.18729e-13	3015.97	1009.13	759.027
FAM124A	130.558	-2.32684	0.339087	-6.86205	6.78782e-12	1.04702e-10	-1.63922	0.32769	-5.00236	5.6632e-07	3.8479e-06	417.596	134.034	83.1962
LYPD1	117.456	2.04527	0.434982	4.70196	2.57671e-06	1.42569e-05	1.99006	0.420835	4.72884	2.25809e-06	1.3503e-05	30.3387	120.41	125.113
ADRA2A	241.097	-2.57974	0.394468	-6.53979	6.16033e-11	8.19777e-10	-1.48925	0.381284	-3.90588	9.38822e-05	0.00038824	741.772	264.302	124.105
GPM6A	32.117	-3.63386	0.551737	-6.58622	4.51176e-11	6.12544e-10	-2.77909	0.532853	-5.21549	1.83327e-07	1.38259e-06	197.461	28.7083	15.8689
WDR17	38.6383	-2.30458	0.573315	-4.01975	5.82605e-05	0.000234114	-1.79111	0.554044	-3.23279	0.00122588	0.0037637	132.319	38.1768	26.6972
SPATA4	2.3173	-2.81067	0.472253	-5.95162	2.65503e-09	2.62707e-08	-2.3456	0.450963	-5.20131	1.97889e-07	1.47986e-06	10.9894	2.12825	1.4893
DLG2	82.2558	-2.7733	0.338057	-8.20366	2.33184e-16	7.36391e-15	-2.47079	0.326655	-7.56392	3.91091e-14	1.00346e-12	400.022	72.1541	58.4696
PRSS23	6119.79	-1.45611	0.29956	-4.86082	1.16899e-06	6.98642e-06	-1.05014	0.289626	-3.62584	0.000288027	0.00105358	13076.8	6315.07	4766.07
PPP1R1C	85.2739	1.2451	0.368781	3.37625	0.000734814	0.0022284	1.33472	0.356769	3.74114	0.000183191	0.000704389	35.3535	89.4271	84.0772
DIXDC1	692.476	-3.72537	0.303691	-12.267	1.36263e-34	6.24483e-32	-3.03367	0.293577	-10.3335	4.97262e-25	1.21506e-22	4732.57	577.876	357.709
ABCB9	443.446	1.08487	0.182875	5.93232	2.98689e-09	2.92616e-08	1.20817	0.176881	6.83043	8.46583e-12	1.49494e-10	201.719	466.285	428.019
ITPR1	1286.76	-3.03132	0.278793	-10.873	1.55006e-27	2.65448e-25	-2.80538	0.269535	-10.4082	2.27461e-25	6.09097e-23	7349.66	1051.28	898.888
PRSS53	82.3053	1.04511	0.237418	4.40198	1.0727e-05	5.11974e-05	1.06895	0.22982	4.65125	3.29921e-06	1.90189e-05	40.5397	84.7295	83.2282
ENKUR	25.3111	1.79212	0.422086	4.24587	2.17742e-05	9.65632e-05	2.39479	0.409326	5.85057	4.89893e-09	5.09384e-08	5.58943	29.6226	19.4798
GPR158	128.614	1.99246	0.535052	3.72386	0.000196199	0.000686385	2.51357	0.517545	4.85671	1.1935e-06	7.60449e-06	26.0476	148.613	103.553
CACNA1C	639.86	-3.56	0.357513	-9.95768	2.33452e-23	2.11911e-21	-2.86137	0.34562	-8.27897	1.24248e-16	4.9166e-15	4011.18	551.951	340.049
SLC2A13	276.3	-1.29119	0.261167	-4.9439	7.65739e-07	4.75487e-06	-1.17867	0.252475	-4.66848	3.0344e-06	1.76327e-05	607.077	268.011	247.854
DIP2C	1323.61	-1.51611	0.198454	-7.63964	2.17825e-14	5.09704e-13	-1.37393	0.191863	-7.16098	8.01018e-13	1.65521e-11	3301	1273.42	1153.78
AKAP6	252.664	-4.50352	0.388922	-11.5795	5.23503e-31	1.51333e-28	-3.71936	0.375898	-9.89459	4.39386e-23	6.92671e-21	2364.59	179.499	104.156
KCTD14	159.951	1.60978	0.404313	3.98151	6.84792e-05	0.000270827	1.15625	0.391049	2.9568	0.00310849	0.00851762	65.9506	147.337	201.792
FER	702.283	-1.17555	0.183493	-6.40651	1.48888e-10	1.8466e-09	-1.0002	0.17739	-5.63841	1.71629e-08	1.61453e-07	1394.75	696.871	617.082
CCDC3	950.389	-1.40767	0.297625	-4.72967	2.2488e-06	1.26323e-05	-1.38049	0.28775	-4.79753	1.60631e-06	9.92734e-06	2329.57	894.814	878.052
ANO4	33.2032	-2.04389	0.480949	-4.2497	2.14061e-05	9.51774e-05	-1.78998	0.464745	-3.85154	0.000117379	0.000473256	108.807	31.4753	26.3348
EDNRA	616.602	-2.6752	0.312911	-8.54938	1.23755e-17	4.62298e-16	-1.8305	0.302493	-6.05138	1.43613e-09	1.66609e-08	2255.01	634.015	353.014
NR3C2	260.748	-3.58664	0.411048	-8.72558	2.64818e-18	1.10331e-16	-3.00561	0.397341	-7.56432	3.8989e-14	1.00284e-12	1735.52	216.041	144.42
ADAM8	3336.83	1.46738	0.301983	4.85917	1.1788e-06	7.03834e-06	1.54627	0.291979	5.29583	1.18476e-07	9.27501e-07	1199.08	3502.58	3316.22
ITIH2	32.5428	2.05984	0.524051	3.93061	8.47295e-05	0.000327115	1.35883	0.50741	2.67798	0.00740674	0.0183054	10.936	33.7301	72.9833
CENPU	1204.67	1.44518	0.224931	6.425	1.31872e-10	1.65302e-09	1.65328	0.217505	7.60111	2.9361e-14	7.70401e-13	413.415	1299.68	1125.18
SLC25A4	1392.23	-1.71017	0.187202	-9.13543	6.51487e-20	3.52779e-18	-1.70891	0.180986	-9.44223	3.64915e-21	3.79434e-19	4144.16	1267.46	1266.33
SERP2	76.5894	-1.18625	0.347703	-3.41167	0.000645658	0.0019902	-1.08938	0.336092	-3.24131	0.00118981	0.00366853	158.72	74.6261	69.7859
ZNF385D	87.0014	-2.3942	0.469984	-5.09421	3.50194e-07	2.33091e-06	-1.39046	0.454181	-3.06147	0.00220253	0.00629456	249.585	95.2896	47.5025
TDO2	272.261	2.00722	0.377309	5.31983	1.03863e-07	7.66533e-07	2.40017	0.364951	6.57669	4.81038e-11	7.45114e-10	58.0876	306.61	233.519
SACS	763.468	-1.90133	0.33618	-5.65568	1.55227e-08	1.34041e-07	-1.44383	0.325014	-4.44236	8.89776e-06	4.64845e-05	2096.58	770.532	561.135
GFRA1	197.501	-3.11699	0.540953	-5.76204	8.31014e-09	7.55066e-08	-3.22807	0.522983	-6.17243	6.72503e-10	8.30454e-09	1328.35	141.805	153.164
BAG3	4221.44	-1.52049	0.194352	-7.8234	5.14168e-15	1.32345e-13	-1.43536	0.187905	-7.63877	2.19312e-14	5.92142e-13	10763.6	3979.65	3751.61
TMEM132D	0.734412	-2.74585	0.786735	-3.49018	0.000482687	0.00153211	-2.18431	0.75195	-2.90486	0.00367414	0.00984674	7.11654	0.690685	1.60591
SCHIP1	42.3592	-1.68842	0.291038	-5.80139	6.57685e-09	6.07566e-08	-1.30152	0.281043	-4.63104	3.63832e-06	2.08141e-05	105.283	42.5986	32.5715
KCNE4	471.785	-4.6495	0.377416	-12.3193	7.13107e-35	3.43571e-32	-3.2844	0.364798	-9.00334	2.18957e-19	1.47085e-17	3844.3	394.69	153.175
TMEM56	542.674	-1.32176	0.351552	-3.75979	0.000170054	0.000605748	-1.40951	0.339888	-4.147	3.36861e-05	0.000155269	1319.38	496.544	527.698
TUBA3E	21.6127	5.58153	1.10617	5.0458	4.51622e-07	2.94039e-06	6.09103	1.07583	5.66171	1.49871e-08	1.42356e-07	3.04793	47.3882	38.1695
FAM168B	4348.74	-1.15226	0.147578	-7.80778	5.82027e-15	1.48389e-13	-1.154	0.142683	-8.08787	6.07147e-16	2.17771e-14	9146.37	4109.6	4114.45
HSPB8	3938.85	-3.6622	0.437115	-8.37812	5.37784e-17	1.84061e-15	-3.00561	0.422617	-7.11189	1.14463e-12	2.32833e-11	26152.3	3256.38	2065.73
POU4F1	35.8886	3.06559	0.654502	4.68384	2.81544e-06	1.54278e-05	3.09043	0.634179	4.87312	1.09847e-06	7.06113e-06	4.42161	37.7184	78.3879
SETBP1	518.206	-2.43236	0.338495	-7.1858	6.68143e-13	1.21769e-11	-2.0054	0.327241	-6.1282	8.88761e-10	1.07244e-08	1979.03	492.809	366.519
SPC25	421.191	1.77185	0.241751	7.32922	2.31493e-13	4.55472e-12	1.78646	0.233846	7.63947	2.18112e-14	5.89718e-13	126.65	436.19	431.801
PDE3B	607.487	-1.66812	0.322103	-5.17883	2.23277e-07	1.54469e-06	-1.47917	0.311407	-4.74996	2.03459e-06	1.2283e-05	1623.06	582.055	510.651
KCNK13	107.969	1.61173	0.456112	3.53363	0.000409889	0.00132447	2.7074	0.441257	6.13565	8.48091e-10	1.02908e-08	20.748	164.004	63.6806
JMY	1055.6	-1.14419	0.158939	-7.19892	6.06911e-13	1.11693e-11	-1.14399	0.153658	-7.44503	9.69188e-14	2.33034e-12	2214.09	1001.46	1001.28
USP12	1396.9	-1.66136	0.145573	-11.4126	3.61922e-30	9.71503e-28	-1.54216	0.140732	-10.9582	6.07236e-28	2.0825e-25	3841.91	1318.69	1214.19
TRIM36	68.5073	1.80017	0.425089	4.23482	2.28735e-05	0.000101033	1.48597	0.411365	3.61229	0.000303504	0.00110421	23.4074	65.7207	81.6863
PLEKHH2	258.1	-1.29188	0.321863	-4.01376	5.97579e-05	0.000239159	-1.17006	0.311162	-3.76031	0.000169705	0.00065756	564.481	250.874	230.493
IGSF10	147.581	-3.74015	0.594629	-6.2899	3.17681e-10	3.69382e-09	-3.57274	0.574843	-6.21516	5.12736e-10	6.50842e-09	1212.07	101.848	90.6764
SPARCL1	7682.98	-3.68015	0.337784	-10.895	1.2181e-27	2.15925e-25	-2.94717	0.326581	-9.02431	1.80831e-19	1.23167e-17	50559.6	6555.69	3944.25
DMP1	5.93959	1.27594	0.518873	2.45906	0.0139301	0.0294461	1.17533	0.503872	2.33259	0.0196695	0.042518	2.58491	5.90631	10.0972
MBNL1	5468.2	-1.4184	0.142306	-9.96731	2.11891e-23	1.9656e-21	-1.28938	0.137584	-9.37158	7.14551e-21	7.01912e-19	12874.7	5266.81	4816.16
CCNO	500.413	1.40905	0.306077	4.6036	4.1525e-06	2.18436e-05	1.09147	0.29598	3.68765	0.000226338	0.000850857	222.02	473.881	590.541
PRDM8	202.966	-2.15666	0.358735	-6.01184	1.83432e-09	1.87728e-08	-1.77957	0.346774	-5.13178	2.87013e-07	2.07337e-06	674.854	196.489	151.247
UTRN	1841.39	-1.45709	0.242191	-6.01628	1.78468e-09	1.83346e-08	-1.5059	0.234156	-6.43117	1.26627e-10	1.81474e-09	4787.91	1685.81	1743.74
ZNF117	2310.35	1.50355	0.371095	4.05167	5.08526e-05	0.000206867	1.87759	0.358802	5.23294	1.66835e-07	1.26505e-06	703.21	2584.2	1994.04
RAB3C	38.0904	-1.74636	0.543393	-3.2138	0.00130989	0.00369951	-1.35057	0.525165	-2.5717	0.01012	0.0239615	98.1023	38.4775	29.1667
STK32B	74.4617	-2.79285	0.358892	-7.78186	7.14637e-15	1.80242e-13	-1.85846	0.346646	-5.36127	8.2638e-08	6.678e-07	279.865	77.1334	40.3628
ZIC1	49.8213	3.80334	1.0381	3.66376	0.000248537	0.000846478	4.86577	1.00548	4.83926	1.30325e-06	8.21914e-06	5.98842	62.9366	30.1113
CENPH	685.704	1.30686	0.190661	6.85438	7.16218e-12	1.10039e-10	1.47735	0.184395	8.01188	1.12972e-15	3.86078e-14	263.187	732.885	651.167
RASSF3	1920.31	-2.54441	0.208195	-12.2213	2.39221e-34	1.02158e-31	-2.3392	0.201281	-11.6216	3.20192e-31	2.15832e-28	8543.33	1688.1	1464.29
PTPRR	839.556	2.74945	0.56881	4.83368	1.34033e-06	7.88256e-06	2.25092	0.549997	4.0926	4.26558e-05	0.000191775	161.615	769.738	1087.44
NR4A2	1108.38	-3.19932	0.327339	-9.77373	1.45972e-22	1.17214e-20	-2.73467	0.316467	-8.64125	5.56028e-18	2.88863e-16	6342.06	952.865	690.515
LPCAT1	6759.84	1.29348	0.276554	4.67713	2.90921e-06	1.58999e-05	1.42381	0.267388	5.32489	1.01015e-07	8.02049e-07	2671.25	7166.71	6547.67
PLEKHG4B	490.685	3.61991	0.603305	6.00013	1.97165e-09	2.00908e-08	4.08424	0.583506	6.99947	2.56924e-12	4.97035e-11	33.2514	564.818	409.344
C16orf89	131.06	-4.86158	0.534014	-9.10385	8.71889e-20	4.5762e-18	-4.0865	0.516105	-7.91796	2.41436e-15	7.67413e-14	1409.67	83.1147	48.4944
TEX29	27.4186	1.4165	0.35799	3.9568	7.59601e-05	0.000296672	1.52507	0.346936	4.39583	1.1035e-05	5.64543e-05	9.95642	29.0076	32.0071
PTPRD	208.635	-2.37076	0.51908	-4.56722	4.94226e-06	2.55404e-05	-1.74912	0.50181	-3.48563	0.000490987	0.00168176	706.862	210.265	136.635
CNKSR3	691.561	-1.60769	0.275212	-5.84166	5.16826e-09	4.86775e-08	-1.69525	0.266076	-6.37128	1.87457e-10	2.58239e-09	2005.78	619.304	658.003
JAZF1	518.531	-2.46075	0.261646	-9.40492	5.20714e-21	3.22911e-19	-1.94928	0.252926	-7.70692	1.28886e-14	3.61993e-13	1940.06	502.283	352.328
PID1	228.099	-3.37616	0.383804	-8.79658	1.41047e-18	6.16342e-17	-2.9957	0.371001	-8.07464	6.76784e-16	2.40541e-14	1473.55	184.761	141.86
LGI4	238.356	-2.47639	0.332774	-7.44164	9.94435e-14	2.07616e-12	-2.10627	0.321674	-6.54783	5.83806e-11	8.83985e-10	953.731	221.691	171.458
CACNA2D1	506.954	-2.95277	0.412881	-7.15161	8.57651e-13	1.52751e-11	-2.27188	0.399155	-5.69173	1.25755e-08	1.21336e-07	2332.9	482.969	301.175
ANKRD29	158.841	-2.58462	0.461083	-5.60556	2.07588e-08	1.75465e-07	-1.96941	0.445702	-4.41868	9.93056e-06	5.12874e-05	611.038	156.035	101.856
UBASH3B	1180.65	1.1013	0.305936	3.59976	0.00031851	0.00106001	1.1926	0.295809	4.03166	5.53853e-05	0.000242263	538.851	1232.19	1156.49
GPR15	22.9217	-2.58171	0.616502	-4.18767	2.81837e-05	0.000121239	-2.59324	0.595808	-4.35247	1.34613e-05	6.76454e-05	111.696	18.4853	18.6632
ABI3BP	759.749	-3.88616	0.411028	-9.45473	3.23871e-21	2.05592e-19	-3.16529	0.397368	-7.96565	1.64357e-15	5.40884e-14	5545.35	618.16	375.036
ANGPT1	223.84	-1.86787	0.413404	-4.51828	6.23442e-06	3.15499e-05	-1.1754	0.399631	-2.9412	0.00326938	0.00890606	540.457	239.315	148.017
PRKCA	1349.47	-1.0869	0.264164	-4.1145	3.8802e-05	0.00016202	-1.21229	0.255402	-4.7466	2.06862e-06	1.24614e-05	2879.61	1242.55	1355.4
ABCA9	221.986	-1.97391	0.470483	-4.19551	2.72263e-05	0.000117659	-2.12785	0.454863	-4.67801	2.89666e-06	1.69178e-05	817.224	187.082	207.994
ENPP3	11.8644	-2.37163	0.420481	-5.64028	1.69777e-08	1.45336e-07	-2.02808	0.405538	-5.00097	5.70424e-07	3.87444e-06	45.3813	11.1205	8.73115
DISP1	320.068	-1.57485	0.22151	-7.10962	1.16365e-12	2.02079e-11	-1.80603	0.214145	-8.43367	3.35004e-17	1.49855e-15	963.078	275.333	323.108
TNIK	523.678	-1.33921	0.348143	-3.84672	0.00011971	0.000442873	-1.01555	0.336582	-3.01726	0.0025507	0.00717426	1077.63	532.939	425.907
PGM5	2011.87	-5.44864	0.548416	-9.93523	2.92497e-23	2.64231e-21	-4.58162	0.530217	-8.64103	5.57098e-18	2.88863e-16	25655.7	1071.48	587.432
LONRF1	886.659	-1.05125	0.202264	-5.19742	2.02075e-07	1.40786e-06	-1.14182	0.195551	-5.83896	5.25273e-09	5.41849e-08	1817.05	823.559	876.816
CCSAP	819.365	1.05983	0.172133	6.15703	7.41203e-10	8.11136e-09	1.20764	0.166465	7.25461	4.0282e-13	8.72018e-12	375.772	867.464	783.091
GBP5	1984.01	2.59827	0.561579	4.62672	3.71506e-06	1.982e-05	2.53852	0.54298	4.67515	2.93733e-06	1.71451e-05	351.392	2041.7	2128.05
GPR26	1.84514	-3.37343	0.731715	-4.61031	4.02072e-06	2.12337e-05	-2.12059	0.698157	-3.03742	0.00238615	0.00675714	8.45282	1.89645	0.815478
CCDC173	14.8636	-1.38428	0.301336	-4.5938	4.35254e-06	2.27576e-05	-1.61181	0.291066	-5.5376	3.06649e-08	2.71239e-07	39.7544	13.0087	15.1976
FAM69A	568.151	-1.19071	0.23287	-5.11319	3.16761e-07	2.12949e-06	-1.02194	0.22513	-4.53932	5.64357e-06	3.09021e-05	1143.1	562.7	500.6
PDLIM3	2528.72	-4.14451	0.42926	-9.65501	4.6811e-22	3.40922e-20	-2.9048	0.415014	-6.99928	2.57278e-12	4.97035e-11	17123.1	2286.39	968.166
SORBS2	1367	-4.10972	0.390328	-10.5289	6.35873e-26	8.53432e-24	-3.46687	0.377368	-9.18697	4.04072e-20	3.23722e-18	11349.5	1026.43	657.347
TMPRSS15	5.09179	3.086	0.971512	3.17649	0.00149068	0.0041533	4.19955	0.94481	4.44486	8.79508e-06	4.59819e-05	2.83827	14.8137	16.2675
PDE1C	166.362	-4.16008	0.415187	-10.0198	1.24793e-23	1.2025e-21	-3.68086	0.401288	-9.17262	4.61676e-20	3.66863e-18	1486.93	115.963	83.1459
JAM2	363.957	-3.11891	0.310788	-10.0355	1.06429e-23	1.04157e-21	-2.50751	0.300415	-8.34681	7.01342e-17	2.9675e-15	1884.64	331.508	216.967
ADAMTS1	4138.13	-3.65411	0.346429	-10.5479	5.19311e-26	7.12252e-24	-3.31249	0.334938	-9.88985	4.60707e-23	7.20472e-21	30884.3	3108.73	2453.24
ADAMTS5	276.708	-2.21406	0.31584	-7.01007	2.38204e-12	3.94456e-11	-1.76688	0.305307	-5.78723	7.15567e-09	7.19172e-08	922.617	271.067	198.827
SLFN13	1106.96	1.60701	0.401424	4.00329	6.24685e-05	0.000249052	1.66017	0.388137	4.27727	1.89196e-05	9.24138e-05	366.803	1159.57	1117.63
WNT7A	454.762	2.61326	0.626736	4.16963	3.05092e-05	0.00013014	3.27164	0.60606	5.39822	6.73071e-08	5.52127e-07	55.6567	538.068	340.892
SKA1	663.321	2.058	0.242702	8.47954	2.2608e-17	8.13801e-16	2.08424	0.234746	8.87871	6.7643e-19	4.19773e-17	162.817	689.219	676.835
PIEZO2	260.977	-1.35403	0.383398	-3.53167	0.000412943	0.00133343	-1.45731	0.370669	-3.93157	8.43928e-05	0.000353636	645.121	234.956	252.297
EME1	285.729	2.43936	0.237244	10.2821	8.48825e-25	9.60809e-23	2.64797	0.22969	11.5284	9.48673e-31	5.45431e-28	49.6414	310.614	268.731
EPHB1	112.097	-2.73571	0.43404	-6.3029	2.92132e-10	3.41365e-09	-3.08726	0.419606	-7.35751	1.87373e-13	4.27567e-12	673.923	79.2234	101.102
DKK2	121.839	1.63153	0.439296	3.71397	0.000204032	0.000710349	2.58374	0.42497	6.07982	1.20319e-09	1.41601e-08	25.0581	150.627	77.8093
CYP2U1	328.26	-1.14602	0.236617	-4.84337	1.27655e-06	7.5524e-06	-1.27148	0.228755	-5.55826	2.7247e-08	2.43541e-07	728.135	301.501	328.724
KLF10	3140.1	-1.32807	0.233162	-5.69593	1.22702e-08	1.07536e-07	-1.12172	0.225428	-4.97598	6.49186e-07	4.35643e-06	6763.91	3108.22	2693.94
PTPRN2	277.214	-1.53917	0.387708	-3.96991	7.18984e-05	0.000282393	-1.92149	0.374845	-5.12609	2.95814e-07	2.13143e-06	865.227	228.41	297.754
PIP4P2	362.454	-1.63175	0.212529	-7.67779	1.61862e-14	3.85963e-13	-1.31615	0.205433	-6.40671	1.48695e-10	2.08664e-09	901.15	361.748	290.555
GPR78	490.067	2.53098	0.550733	4.59565	4.31407e-06	2.25986e-05	2.36197	0.532549	4.43521	9.19823e-06	4.78847e-05	94.8047	487.143	547.63
MAGEC1	32.5892	3.37741	1.28305	2.63233	0.00848006	0.0191124	6.9157	1.24473	5.55597	2.76075e-08	2.46313e-07	2.01449	137.298	14.6201
LRGUK	35.0197	2.08466	0.354234	5.88499	3.98075e-09	3.80652e-08	1.82397	0.343597	5.30845	1.10563e-07	8.69029e-07	9.41144	33.7592	40.4516
PDIA4	15812	1.23736	0.155606	7.9519	1.83667e-15	5.07514e-14	1.43333	0.150449	9.52696	1.6195e-21	1.87326e-19	6282.32	16967.4	14812.3
PDZD9	3.29025	-1.18633	0.299903	-3.95572	7.63057e-05	0.000297925	-1.41618	0.288931	-4.90146	9.51284e-07	6.20891e-06	7.90336	2.91792	3.38324
FZD7	1276.81	-2.08602	0.269351	-7.74462	9.5866e-15	2.36394e-13	-2.02944	0.260411	-7.79322	6.5322e-15	1.92307e-13	4636.57	1135.66	1091.94
PPARGC1B	504.684	-1.16956	0.251255	-4.65488	3.24162e-06	1.7518e-05	-1.65289	0.242925	-6.80414	1.01658e-11	1.76484e-10	1301.34	413.726	578.369
LSM11	471.197	-1.94188	0.171603	-11.3161	1.09198e-29	2.53313e-27	-1.72093	0.165866	-10.3755	3.20658e-25	8.03619e-23	1469.3	445.438	382.177
SLC24A2	47.5595	2.25514	0.445387	5.06334	4.11982e-07	2.70291e-06	3.17646	0.431743	7.3573	1.87669e-13	4.27571e-12	6.49518	58.6319	30.9737
PXYLP1	1351.49	1.2969	0.242374	5.35084	8.75486e-08	6.5907e-07	1.29709	0.23436	5.53461	3.11916e-08	2.75648e-07	563.354	1384.76	1384.59
RAET1L	64.5578	3.85612	0.611652	6.30444	2.8924e-10	3.38197e-09	3.65176	0.592722	6.161	7.22886e-10	8.86372e-09	165.171	76.252	74.2551
CLIC2	416.848	-1.15535	0.289763	-3.98723	6.68492e-05	0.000265223	-1.01568	0.280137	-3.62563	0.000288253	0.00105421	832.121	411.558	373.58
MICU3	65.4355	-3.68223	0.350386	-10.509	7.84811e-26	1.04301e-23	-3.15295	0.338405	-9.31709	1.19574e-20	1.08717e-18	464.896	52.2638	36.1632
MAGEA8	31.1743	2.27667	0.742317	3.06698	0.00216237	0.00575509	3.71941	0.719065	5.17256	2.30911e-07	1.69959e-06	171.995	97.349	81.4852
ELMSAN1	1710.28	-1.30771	0.158937	-8.22788	1.90552e-16	6.09962e-15	-1.35623	0.15366	-8.82612	1.08371e-18	6.41952e-17	4052.37	1582.79	1636.89
GNA14	272.621	-1.28152	0.404148	-3.17093	0.00151953	0.00422305	-1.08446	0.390723	-2.77551	0.00551154	0.0141039	573.843	270.667	236.067
UGT2B4	7.361	3.76972	0.943356	3.99608	6.44004e-05	0.000256103	2.676	0.917361	2.91707	0.00353342	0.00952051	0.894775	5.6331	11.9718
MMP16	144.123	-1.80735	0.387954	-4.65867	3.18255e-06	1.72484e-05	-1.04759	0.374977	-2.79374	0.00521021	0.0134259	325.075	157.298	92.782
KCNMA1	757.65	-4.70404	0.407961	-11.5306	9.24997e-31	2.63344e-28	-3.94864	0.394392	-10.012	1.35038e-23	2.42176e-21	7733.67	500.876	296.677
ADAMTSL3	159.701	-4.4204	0.468618	-9.43283	3.99163e-21	2.50845e-19	-4.25247	0.452977	-9.38782	6.12541e-21	6.14049e-19	1724.77	90.4806	80.4687
SLC28A1	12.156	1.28786	0.496251	2.59518	0.00945406	0.0210003	1.81108	0.481015	3.76512	0.00016647	0.000647334	3.93539	13.9061	9.63279
CXCL13	1186.41	-2.83879	0.589256	-4.81758	1.45309e-06	8.48729e-06	-2.3079	0.56971	-4.05101	5.0996e-05	0.000224773	5458.16	1102.5	1707.33
NAA11	41.7941	2.62633	1.13254	2.31899	0.0203958	0.0409091	6.15761	1.09813	5.60738	2.05412e-08	1.89763e-07	0.905367	83.1631	15.0516
TSPAN7	814.872	-1.91475	0.496544	-3.85615	0.000115186	0.000428076	-1.33751	0.480067	-2.78609	0.00533477	0.0137126	2118.64	838.329	561.916
PPP2R2B	562.305	-1.08789	0.467399	-2.32753	0.0199368	0.0401128	-1.06933	0.451896	-2.36632	0.0179661	0.0393857	1126.97	537.01	530.171
KCNS2	9.99726	-3.34928	0.445138	-7.52413	5.30713e-14	1.16107e-12	-2.04996	0.427405	-4.7963	1.61626e-06	9.98564e-06	43.4567	10.4907	4.25635
HKDC1	143.454	2.53036	0.602604	4.19905	2.6804e-05	0.000116128	3.32355	0.582962	5.70114	1.19011e-08	1.15455e-07	89.2401	173.778	100.294
LRFN2	74.4276	2.62058	0.610573	4.29201	1.77067e-05	8.02481e-05	2.44108	0.590805	4.13178	3.5997e-05	0.000164794	13.6026	74.0518	83.8275
MS4A1	284.942	-2.31021	0.70638	-3.27049	0.0010736	0.00311454	-1.6828	0.682928	-2.4641	0.0137358	0.0312072	928.753	427.042	875.387
ATAD2	2787.63	1.29862	0.21025	6.17657	6.55079e-10	7.22356e-09	1.44805	0.203291	7.123	1.056e-12	2.15478e-11	1084.68	2959.05	2667.94
FBXO32	3490	-2.60056	0.303659	-8.5641	1.08925e-17	4.09342e-16	-1.80919	0.293583	-6.16244	7.16319e-10	8.80667e-09	12508.4	3569.14	2062.2
SASS6	481.306	1.17102	0.172334	6.79508	1.0825e-11	1.6143e-10	1.19159	0.166695	7.14832	8.78432e-13	1.79996e-11	217.348	495.317	488.372
ADGRG4	1.89201	-5.59555	0.694156	-8.06094	7.57088e-16	2.22276e-14	-5.08405	0.660262	-7.70005	1.36015e-14	3.80374e-13	27.2553	0.799219	0.538275
MPV17L	234.809	-1.16967	0.446814	-2.6178	0.00884987	0.0198317	-1.35422	0.43199	-3.13485	0.0017194	0.00507716	541.547	211.761	240.699
BUB1B	1134.6	1.95628	0.236689	8.26523	1.3943e-16	4.5484e-15	2.01586	0.228891	8.80708	1.28445e-18	7.40659e-17	294.024	1188.11	1140.04
RBPMS	3925.11	-1.7248	0.258241	-6.67904	2.4051e-11	3.40557e-10	-1.78714	0.249676	-7.15781	8.19736e-13	1.68854e-11	12064	3495.49	3649.86
TMEM171	104.666	1.30466	0.44099	2.95849	0.0030915	0.00786692	1.144	0.426522	2.68216	0.00731483	0.0181046	46.9308	103.775	116.001
LRP8	816.827	1.42386	0.305108	4.66674	3.06013e-06	1.66184e-05	1.84329	0.295027	6.24787	4.16094e-10	5.40452e-09	256.603	920.18	688.04
CLEC18A	10.0188	1.60762	0.398273	4.03648	5.42582e-05	0.000219486	1.49841	0.387369	3.86818	0.000109652	0.000445999	3.50245	25.4733	13.0072
IL34	238.413	-1.76576	0.355044	-4.97335	6.58069e-07	4.1438e-06	-1.11346	0.343205	-3.24429	0.00117743	0.00363704	551.575	254.938	162.214
CCNB2	1981.37	1.95867	0.231257	8.46967	2.46097e-17	8.7912e-16	2.07574	0.22362	9.28244	1.65635e-20	1.45848e-18	498.982	2103.22	1939.3
TSC22D3	5138.57	-1.80603	0.252188	-7.16145	7.98261e-13	1.4326e-11	-1.22351	0.243822	-5.01803	5.22042e-07	3.57564e-06	12576.5	5385.91	3596.7
KCNJ6	13.374	1.7115	0.543761	3.14752	0.00164663	0.00453336	2.54677	0.527535	4.82768	1.3813e-06	8.67944e-06	2.77945	16.2063	9.12185
ERG	436.815	-1.12932	0.265531	-4.25305	2.10877e-05	9.38284e-05	-1.06833	0.256711	-4.1616	3.16032e-05	0.000146706	886.699	422.937	405.433
ETS2	12200.9	-1.4188	0.240568	-5.8977	3.68604e-09	3.54638e-08	-1.49397	0.232591	-6.42316	1.33475e-10	1.90495e-09	31358.2	11133.3	11728.8
TSPAN18	790.498	-2.72421	0.345435	-7.88631	3.1125e-15	8.29557e-14	-2.57352	0.333966	-7.70595	1.29873e-14	3.64239e-13	3957.93	664.898	598.9
MX1	7920.13	1.24313	0.347468	3.57769	0.00034664	0.00114109	1.06846	0.33595	3.18042	0.0014706	0.00441993	3727.67	7817.9	8824.08
SVOPL	83.8955	1.15189	0.411339	2.80035	0.00510471	0.0122001	1.13829	0.397878	2.8609	0.00422436	0.0111411	38.6193	85.3239	86.158
SLC34A2	114.165	1.86588	0.790278	2.36104	0.018224	0.037172	4.11857	0.764427	5.38778	7.13321e-08	5.81727e-07	29.8927	528.537	86.628
ACAN	247.929	1.32109	0.391299	3.37616	0.000735056	0.00222877	1.42412	0.378402	3.76352	0.000167541	0.000650853	97.5655	261.929	243.867
PSMG3	2652.34	1.37483	0.170805	8.04912	8.3392e-16	2.43313e-14	1.44699	0.165159	8.7612	1.93176e-18	1.07584e-16	1018.52	2777.5	2642
CABP1	73.7381	-1.57847	0.399298	-3.95313	7.71369e-05	0.000300602	-1.54732	0.385973	-4.00888	6.10067e-05	0.000265013	200.185	68.5284	67.0873
DRC1	10.8308	1.61782	0.494608	3.27092	0.001072	0.00311086	2.088	0.480164	4.34852	1.37062e-05	6.87702e-05	2.86426	16.4465	8.90618
RADIL	71.445	-2.13448	0.394934	-5.40466	6.49308e-08	4.99202e-07	-1.2208	0.381559	-3.19951	0.0013766	0.00416637	182.868	78.4447	41.5759
ANKRD61	16.153	1.11602	0.272577	4.09433	4.23384e-05	0.000175461	1.10358	0.264818	4.16733	3.08195e-05	0.000143481	7.66153	16.476	16.518
SLC30A2	845.061	2.02996	0.62957	3.22437	0.00126252	0.00358728	2.25042	0.608725	3.69694	0.000218217	0.000823973	192.834	917.886	787.799
TRIM63	60.6394	-3.87996	0.601864	-6.44657	1.14408e-10	1.44666e-09	-3.16729	0.581631	-5.44553	5.1652e-08	4.32602e-07	441.922	49.198	30.0449
WDR66	557.775	2.84786	0.457817	6.22051	4.95535e-10	5.57218e-09	3.10487	0.442758	7.01256	2.33999e-12	4.55146e-11	70.6875	607.7	508.511
DUSP2	2274.06	-1.98438	0.417295	-4.75535	1.98108e-06	1.12597e-05	-2.90056	0.403461	-7.18918	6.51793e-13	1.37003e-11	10832.5	1450.72	2737.66
UBXN11	1396.02	1.06299	0.20248	5.24983	1.52236e-07	1.08765e-06	1.03946	0.195787	5.30916	1.10133e-07	8.67051e-07	690.821	1420.37	1443.63
GALNT14	1216.1	1.9318	0.404762	4.77268	1.81787e-06	1.04044e-05	1.78301	0.391367	4.55584	5.21759e-06	2.88199e-05	353.046	1215.26	1347.36
HPD	54.6171	-2.57513	0.406229	-6.33911	2.31098e-10	2.76229e-09	-1.83106	0.392417	-4.66612	3.06941e-06	1.78203e-05	197.142	55.4596	33.0842
RHPN1	1991.14	2.42051	0.340354	7.11172	1.14604e-12	1.9939e-11	1.98148	0.329095	6.02098	1.73369e-09	1.9842e-08	469.06	1852.84	2511.89
LRRC43	40.5346	1.44867	0.322405	4.49332	7.01219e-06	3.50423e-05	1.6374	0.312357	5.24208	1.58777e-07	1.20958e-06	14.0369	43.5072	38.1691
TMSB15A	129.455	2.2287	0.530244	4.20316	2.63215e-05	0.000114301	2.40087	0.51292	4.68079	2.85776e-06	1.67306e-05	26.5329	139.974	124.177
MRAS	942.846	-1.89674	0.275102	-6.89468	5.3985e-12	8.42884e-11	-1.47691	0.265963	-5.55306	2.80706e-08	2.50102e-07	2629.52	944.491	706.005
FAM46B	576.243	-3.36611	0.4524	-7.44057	1.00252e-13	2.09071e-12	-3.01734	0.437375	-6.89875	5.24639e-12	9.57576e-11	3745.47	462.567	363.213
COLEC12	746.261	-2.95018	0.448733	-6.57447	4.88281e-11	6.56316e-10	-1.87805	0.433823	-4.32907	1.49738e-05	7.45562e-05	2880.38	783.609	372.625
GPRASP2	388.265	-1.52127	0.208818	-7.28515	3.21302e-13	6.19843e-12	-1.42494	0.201861	-7.059	1.67709e-12	3.33056e-11	990.715	368.854	344.795
HIST1H2BD	995.351	2.17811	0.3048	7.14603	8.93208e-13	1.58483e-11	2.41097	0.294752	8.17965	2.84674e-16	1.07222e-14	202.697	1079.18	918.356
CDC25C	367.003	2.07552	0.23693	8.76005	1.95163e-18	8.35332e-17	2.12379	0.229245	9.26428	1.96406e-20	1.67657e-18	88.2669	383.758	371.154
HIST1H4H	106.506	1.60415	0.417664	3.84078	0.000122646	0.000451867	1.65763	0.404035	4.1027	4.08363e-05	0.000184528	35.1626	110.585	106.541
KCNB1	72.7875	-5.79621	0.546552	-10.605	2.82352e-26	4.08107e-24	-4.44346	0.52775	-8.41963	3.77676e-17	1.67032e-15	915.018	42.0524	16.4198
NRG2	96.1991	-1.68697	0.489254	-3.44804	0.000564677	0.00176456	-1.98354	0.473005	-4.1935	2.74688e-05	0.000129513	317.197	80.2298	98.5206
CD1C	72.5449	-1.72521	0.413693	-4.17026	3.04257e-05	0.000129902	-1.60524	0.399874	-4.01438	5.9603e-05	0.000259434	207.022	68.0732	155.678
DNAH3	101.223	1.31664	0.329049	4.00134	6.29841e-05	0.000250895	1.59196	0.318363	5.00044	5.71991e-07	3.88239e-06	36.3368	110.037	90.9755
CD1E	42.2062	-1.15172	0.443816	-2.59505	0.00945777	0.0210061	-1.13577	0.429004	-2.64746	0.00810994	0.0198365	88.414	40.279	39.8661
CPA5	18.7705	1.59529	0.42338	3.76798	0.000164573	0.000587894	1.2217	0.410472	2.97632	0.00291732	0.00804907	7.4344	21.5404	22.8352
DYNC1I1	386.043	-2.5738	0.391124	-6.58053	4.68778e-11	6.33238e-10	-2.41144	0.378127	-6.37733	1.80203e-10	2.48947e-09	1760.06	330.776	295.564
PKD1L1	205.002	1.46417	0.467864	3.12948	0.00175114	0.00479229	1.77553	0.452444	3.9243	8.6982e-05	0.000363162	65.7342	225.387	181.656
SLAMF8	660.445	1.14647	0.397838	2.88174	0.00395481	0.00976617	1.59834	0.384671	4.15508	3.2518e-05	0.000150488	247.055	748.256	547.042
SLC45A3	864.191	1.4648	0.293817	4.98541	6.18311e-07	3.91181e-06	1.08178	0.284108	3.80762	0.00014031	0.000555558	377.011	798.271	1041.07
PLA2G2F	5131.79	2.8094	0.60976	4.60738	4.07774e-06	2.15045e-05	2.44778	0.589551	4.15195	3.29659e-05	0.000152381	887.495	4842.37	6221.72
EDA	164.185	-1.11077	0.379351	-2.92808	0.00341064	0.00856191	-1.08498	0.366744	-2.9584	0.00309242	0.00847953	332.094	156.479	153.686
B4GALT3	4162.89	1.09775	0.197597	5.5555	2.76815e-08	2.28029e-07	1.15554	0.191052	6.04827	1.46412e-09	1.69353e-08	1941.03	4324.42	4154.84
ADAMTS4	1980.36	-3.64911	0.369339	-9.88011	5.07756e-23	4.41701e-21	-2.73992	0.357079	-7.67316	1.67805e-14	4.6071e-13	11971.6	1792.13	954.301
APOA2	102.725	6.52037	0.995078	6.55262	5.65349e-11	7.53933e-10	5.97568	0.965059	6.19204	5.9392e-10	7.41376e-09	6.03821	611.96	2720.72
MPZ	118.247	-2.41437	0.294831	-8.18899	2.63419e-16	8.27701e-15	-2.32702	0.284946	-8.16655	3.17324e-16	1.17929e-14	511.471	101.997	96.0448
CACHD1	444.343	-1.09489	0.314128	-3.4855	0.000491227	0.00155652	-1.20623	0.303704	-3.97172	7.13553e-05	0.000305286	946.611	410.195	443.143
MIS18A	1029.66	1.23659	0.164582	7.51352	5.75563e-14	1.25027e-12	1.31428	0.159165	8.25734	1.48949e-16	5.84668e-15	432.639	1076.05	1019.6
DONSON	1132.8	1.31656	0.18747	7.02276	2.17525e-12	3.62993e-11	1.45013	0.181289	7.99902	1.25415e-15	4.21239e-14	439.764	1201.49	1095.25
STC1	1843.79	-2.08124	0.35878	-5.80088	6.59697e-09	6.08827e-08	-1.66078	0.346877	-4.78782	1.68604e-06	1.03643e-05	5741.04	1815.77	1356.68
CSRP1	18092.3	-3.82706	0.265241	-14.4286	3.41747e-47	3.21071e-43	-3.22165	0.256445	-12.5628	3.38339e-36	5.08758e-33	133719	14334.4	9421.77
RCAN1	2831.83	-3.06444	0.279775	-10.9532	6.41239e-28	1.22948e-25	-2.51468	0.27049	-9.29675	1.44801e-20	1.28662e-18	14600.9	2554.96	1745.28
IGF2BP1	401.177	6.1641	0.771864	7.986	1.39387e-15	3.90326e-14	6.88308	0.747709	9.20556	3.39883e-20	2.81147e-18	17.0578	466.345	283.288
ACTC1	4213.62	-6.57396	0.759336	-8.65752	4.8215e-18	1.93168e-16	-4.94064	0.734147	-6.72977	1.69929e-11	2.85131e-10	61389.7	1999.11	644.361
CHAF1B	939.541	1.54912	0.215491	7.1888	6.53614e-13	1.19469e-11	1.74845	0.208393	8.39014	4.85545e-17	2.11391e-15	301.714	1013.32	882.581
SIM2	713.922	2.34215	0.320949	7.29758	2.92989e-13	5.67554e-12	1.91656	0.310379	6.17491	6.62031e-10	8.19074e-09	175.434	662.264	889.543
SCUBE1	100.7	-2.38778	0.406218	-5.87808	4.15048e-09	3.95273e-08	-2.70284	0.392702	-6.88268	5.87352e-12	1.06409e-10	497.156	76.3135	95.0732
M1AP	57.3088	1.94998	0.557743	3.4962	0.000471929	0.00150119	1.93611	0.539659	3.58765	0.000333667	0.00120054	15.4286	59.3284	59.9009
BTG2	15412.9	-2.04263	0.31572	-6.46976	9.81605e-11	1.25131e-09	-2.32784	0.305252	-7.62595	2.42243e-14	6.49571e-13	61983.3	12346	15044.7
STARD9	316.12	-2.64027	0.260673	-10.1286	4.12378e-24	4.30476e-22	-2.33777	0.251968	-9.27805	1.72604e-20	1.49294e-18	1429.16	282.66	229.119
SPRR2G	50.9279	6.83269	1.20358	5.67696	1.37107e-08	1.1916e-07	6.54746	1.16922	5.59983	2.1456e-08	1.97097e-07	34.8725	199.139	338.169
ISL2	96.9418	2.09538	0.311914	6.71782	1.84462e-11	2.66414e-10	1.77106	0.302024	5.86397	4.51942e-09	4.74976e-08	26.757	92.8563	116.244
DRC7	8.70212	2.16842	0.562926	3.85205	0.000117134	0.000434112	2.3067	0.54751	4.21307	2.5192e-05	0.000119729	1.87526	9.32816	8.45154
TPPP3	802.679	-1.58789	0.370925	-4.28088	1.86154e-05	8.38006e-05	-1.02579	0.358611	-2.86045	0.00423044	0.0111541	1731.99	1020.97	576.167
PIP	23.3994	2.36847	0.847801	2.79366	0.0052115	0.0124222	3.86186	0.821465	4.70118	2.58661e-06	1.52851e-05	2.12136	76.8924	22.7336
NPR2	330.981	-1.71585	0.240457	-7.13579	9.6235e-13	1.6963e-11	-1.69149	0.232451	-7.27676	3.41942e-13	7.49358e-12	977.78	302.722	297.457
ANKLE1	72.4415	1.13844	0.339424	3.35403	0.000796425	0.00238864	1.48974	0.328415	4.53615	5.72892e-06	3.13168e-05	28.6329	80.3766	62.9503
CCDC58	958.108	1.09733	0.138312	7.93371	2.12689e-15	5.80033e-14	1.00999	0.13377	7.5502	4.34602e-14	1.10333e-12	476.627	960.508	1020.43
TFF2	188.69	4.24315	0.775636	5.47054	4.48677e-08	3.55273e-07	3.26831	0.750293	4.35605	1.32429e-05	6.67198e-05	37.3049	216.257	413.892
TMPRSS3	370.706	1.846	0.522974	3.52981	0.000415855	0.00134121	2.59817	0.505712	5.13765	2.78199e-07	2.01565e-06	73.4167	445.194	328.969
WDR4	1048.29	1.12594	0.160619	7.01003	2.38269e-12	3.94456e-11	1.08719	0.155329	6.99926	2.57315e-12	4.97035e-11	498.949	1060.91	1089.85
CBS	61.302	1.78306	0.503458	3.54163	0.000397658	0.00128938	2.12119	0.487164	4.35416	1.33578e-05	6.71945e-05	15.6689	68.1468	53.9467
HSF2BP	52.4132	1.34102	0.28118	4.76925	1.84913e-06	1.05672e-05	1.6972	0.272376	6.2311	4.63182e-10	5.96069e-09	17.9265	58.1871	45.4304
PDXK	9708.12	1.17428	0.175019	6.70943	1.95392e-11	2.81119e-10	1.10658	0.16922	6.5393	6.18058e-11	9.32957e-10	4554.18	9807.01	10278.2
ZNF66	185.652	1.38491	0.408334	3.39161	0.000694831	0.00212153	1.19595	0.394897	3.02851	0.0024576	0.00693705	79.302	182.053	207.497
RALGDS	4423.12	-1.14573	0.158811	-7.21443	5.41603e-13	1.0096e-11	-1.1123	0.153543	-7.24427	4.34784e-13	9.35503e-12	9149.85	4232.55	4135.68
VAV2	3149.54	1.02715	0.236114	4.35025	1.35985e-05	6.32308e-05	1.03854	0.228292	4.54916	5.38598e-06	2.96411e-05	1566.63	3218.34	3193.05
C21orf58	586.953	2.37847	0.24444	9.73029	2.23961e-22	1.72469e-20	2.49708	0.236472	10.5597	4.5804e-26	1.26109e-23	110.747	624.886	575.656
S100B	199.247	-1.53142	0.413012	-3.70792	0.000208965	0.000725611	-1.11784	0.399269	-2.79973	0.00511451	0.0132223	444.543	204.856	153.835
SLC2A6	1152.48	1.59031	0.325197	4.8903	1.00681e-06	6.10456e-06	1.53924	0.31444	4.89518	9.82178e-07	6.39561e-06	404.767	1176.71	1219.18
ZNF761	1263.08	1.21671	0.264206	4.60516	4.12157e-06	2.16992e-05	1.48229	0.255467	5.80226	6.54253e-09	6.63348e-08	489.129	1366.7	1136.94
FCN2	1.33099	-3.62932	0.762025	-4.76273	1.90991e-06	1.08782e-05	-2.07891	0.723573	-2.87312	0.00406436	0.0107831	6.01284	1.41918	0.474101
C9orf116	229.294	1.39623	0.261065	5.34822	8.88247e-08	6.6734e-07	1.31101	0.25254	5.19132	2.08805e-07	1.55591e-06	92.8667	231.022	245.169
HIPK4	11.6432	-2.73923	0.296501	-9.23852	2.49935e-20	1.42312e-18	-1.98275	0.284388	-6.97198	3.12507e-12	5.93861e-11	46.1004	11.5616	6.85569
ST6GALNAC6	1930.54	-1.24186	0.179278	-6.92701	4.29824e-12	6.82127e-11	-1.11369	0.173327	-6.42536	1.31559e-10	1.88105e-09	4085.75	1888.1	1727.6
ZDHHC12	3082.1	1.12873	0.185085	6.09844	1.07111e-09	1.14483e-08	1.08635	0.178959	6.07039	1.27597e-09	1.49e-08	1471.74	3125.47	3218.81
SPTBN4	105.669	-1.77285	0.433216	-4.09231	4.27095e-05	0.000176743	-1.188	0.418735	-2.8371	0.00455248	0.01191	253.808	111.235	74.1776
TMEM190	8.44833	1.32229	0.410634	3.22011	0.00128139	0.00363268	1.32137	0.399042	3.31136	0.000928451	0.00294824	3.43353	8.67654	8.7067
PLPP7	96.6188	-2.48699	0.383677	-6.48199	9.0519e-11	1.16497e-09	-1.56	0.370723	-4.208	2.57642e-05	0.000122213	304.573	103.293	54.2394
JAML	478.385	-1.22169	0.361606	-3.37852	0.000728771	0.00221253	-1.02874	0.349602	-2.94261	0.00325454	0.00886972	971.156	476.105	416.558
TLCD1	1071.64	1.43343	0.263699	5.43588	5.45263e-08	4.2654e-07	1.52901	0.254985	5.99648	2.01641e-09	2.27055e-08	390.468	1127.69	1055.38
PCSK7	1367.78	-2.17663	0.17986	-12.1018	1.03261e-33	4.12824e-31	-1.92664	0.173879	-11.0803	1.56269e-28	5.9897e-26	4843.87	1273.91	1071.07
FLAD1	3037.12	1.07492	0.1397	7.69444	1.42118e-14	3.40179e-13	1.08586	0.135082	8.03855	9.09082e-16	3.19044e-14	1469.56	3119.61	3096.29
IL6R	601.062	-1.11777	0.318377	-3.51085	0.000446678	0.00143031	-1.42408	0.307818	-4.62636	3.72143e-06	2.12501e-05	1405.82	523.872	647.792
CHRNB2	12.4137	1.40904	0.447518	3.14858	0.00164068	0.00452095	1.3915	0.434084	3.2056	0.00134782	0.00408673	4.75565	36.5509	38.6684
PAQR6	316.99	1.46531	0.325667	4.49939	6.81483e-06	3.41908e-05	1.35447	0.314951	4.30059	1.70343e-05	8.39391e-05	123.987	317.281	342.692
PTH1R	70.5626	-2.7153	0.370203	-7.33462	2.2235e-13	4.38401e-12	-2.26401	0.357695	-6.32946	2.46025e-10	3.33284e-09	312.936	65.2391	47.6243
MYL3	10.6956	-3.01453	0.458059	-6.5811	4.66966e-11	6.31245e-10	-2.32696	0.441238	-5.2737	1.33697e-07	1.03423e-06	50.5577	10.1588	6.23426
PPP1R35	1160.87	1.20532	0.187809	6.41777	1.38285e-10	1.72764e-09	1.07697	0.181612	5.93008	3.02782e-09	3.29187e-08	547.787	1156.11	1263.65
CYP3A7	48.254	1.37037	0.441266	3.10554	0.00189929	0.00514233	1.50989	0.427003	3.53601	0.00040622	0.00142527	17.6758	88.6898	64.7711
LY6K	825.913	1.57864	0.422319	3.73804	0.000185463	0.00065394	1.37088	0.408343	3.35717	0.000787451	0.00255148	313.224	810.267	935.8
IER2	7381.02	-1.05391	0.195213	-5.39875	6.71058e-08	5.1487e-07	-1.125	0.18874	-5.96058	2.51346e-09	2.77431e-08	15058.7	6904.61	7253.51
[truncated: 1,665 more rows]

## Sheet: BRCA
DEGs	baseMean	log2FoldChange.early	lfcSE.early	stat.early	pvalue.early	padj.early	log2FoldChange.advanced	lfcSE.advanced	stat.advanced	pvalue.advanced	padj.advanced	Mean.HC	Mean.Early	Mean.Advanced
TNMD	140.845	-3.71586	0.240353	-15.46	6.46002e-54	8.01239e-53	-4.44946	0.26693	-16.669	2.20093e-62	4.97421e-61	905.842	41.4846	69.2726
C1orf112	785.799	1.3181	0.0729683	18.064	6.12718e-73	1.28947e-71	1.23571	0.0809146	15.2718	1.17889e-52	1.87434e-51	337.568	795.08	841.926
CFH	3476.34	-1.49033	0.102723	-14.5083	1.07394e-47	1.0976e-46	-1.35999	0.11398	-11.9318	8.07811e-33	6.02304e-32	8179.97	3186.74	2911.52
SEMA3F	6189.92	1.09866	0.0823388	13.3432	1.29782e-40	1.03508e-39	1.23118	0.0913546	13.477	2.13746e-41	2.27732e-40	2982.25	7001.13	6386.62
AOC1	137.838	2.73785	0.21044	13.0102	1.07117e-38	8.048e-38	2.86432	0.23311	12.2874	1.05855e-34	8.5576e-34	22.0643	272.368	254.765
KLHL13	739.958	-2.66771	0.156181	-17.0809	2.06021e-65	3.45818e-64	-2.47722	0.173308	-14.2938	2.39329e-46	3.07359e-45	3066.04	550.608	482.578
CYP26B1	466.421	-2.02341	0.139652	-14.489	1.42282e-47	1.45038e-46	-2.50159	0.155004	-16.1389	1.3599e-58	2.69939e-57	1548.82	273.514	381.052
DBNDD1	2590.49	1.88271	0.104201	18.0681	5.68199e-73	1.19707e-71	1.92558	0.115597	16.6577	2.66175e-62	5.98803e-61	749.273	2846.42	2763.01
TFPI	1592.92	-1.87082	0.125909	-14.8585	6.13122e-50	6.73024e-49	-1.59233	0.139709	-11.3975	4.3034e-30	2.86581e-29	4497.43	1491.55	1229.8
SLC7A2	14452.1	1.17533	0.202324	5.80915	6.27904e-09	1.34619e-08	1.29839	0.224489	5.78377	7.30434e-09	1.68585e-08	6535.67	16074.8	14760.4
FKBP4	23401.8	1.41273	0.0792483	17.8266	4.39124e-71	8.77889e-70	1.61202	0.0879286	18.3332	4.49397e-75	1.6228e-73	9032.5	27610.7	24048.4
HSPB6	1930.03	-4.69063	0.164342	-28.5418	3.55244e-179	8.80105e-177	-4.29718	0.182359	-23.5645	8.92216e-123	1.21267e-120	14663.4	745.887	567.841
PDK4	6020.18	-3.69197	0.156769	-23.5504	1.2423e-122	8.50148e-121	-3.42077	0.173947	-19.6656	4.25123e-86	2.06464e-84	35918.4	3354	2779.22
ZMYND10	844.407	2.50969	0.153113	16.3911	2.2156e-60	3.27768e-59	2.5408	0.169819	14.9618	1.30388e-50	1.92166e-49	159.955	931.127	911.21
ABCB5	58.3487	-3.82948	0.199948	-19.1524	9.23664e-82	2.37917e-80	-3.05538	0.221924	-13.7677	3.9882e-43	4.54878e-42	344.969	41.4915	24.3059
ARX	67.7877	1.75181	0.271639	6.44904	1.12564e-10	2.6659e-10	2.04654	0.301101	6.79685	1.06933e-11	2.92139e-11	32.3568	84.1825	68.6301
SLC4A1	5.45013	-2.24376	0.214907	-10.4406	1.61763e-25	7.45475e-25	-1.78834	0.239126	-7.47867	7.50798e-14	2.3163e-13	18.0309	5.17645	3.80561
CALCR	32.9597	-1.57771	0.167842	-9.39999	5.45691e-21	2.06302e-20	-1.76529	0.186585	-9.46104	3.04892e-21	1.35406e-20	85.3184	38.2871	38.3202
PRSS22	818.982	1.46432	0.11041	13.2625	3.8193e-40	3.00086e-39	1.39524	0.122471	11.3925	4.55971e-30	3.0334e-29	319.13	839.653	880.803
SKAP2	2013.58	-1.20439	0.0823528	-14.6248	1.95276e-48	2.04711e-47	-1.20038	0.0913823	-13.1358	2.05359e-39	2.01266e-38	4134.12	1798.91	1793.91
MEOX1	477.914	-2.70279	0.16742	-16.1438	1.25604e-58	1.77753e-57	-2.57329	0.185787	-13.8508	1.25857e-43	1.47237e-42	2028.75	340.882	311.658
THSD7A	389.083	-1.31272	0.110445	-11.8858	1.4031e-32	8.47838e-32	-1.18656	0.122567	-9.68091	3.63472e-22	1.69136e-21	834.081	366.413	335.779
ACSM3	303.889	-1.82548	0.127202	-14.351	1.04998e-46	1.03476e-45	-1.52627	0.141162	-10.8122	3.01206e-27	1.76556e-26	832.738	289.098	234.983
PRKAR2B	4678.15	-2.50126	0.118716	-21.0692	1.52444e-98	6.1773e-97	-2.50765	0.131727	-19.0368	8.46163e-81	3.53115e-79	18454.1	3244.91	3259.34
WDR54	848.56	1.00692	0.0829733	12.1354	6.85579e-34	4.36931e-33	1.06396	0.0920323	11.5608	6.51306e-31	4.48535e-30	439.16	918.337	882.641
MYCBP2	5403.19	-1.20324	0.0787452	-15.2802	1.03695e-52	1.23751e-51	-1.31145	0.0873759	-15.0093	6.38301e-51	9.49303e-50	11251.5	4533.19	4886.51
ASB4	16.4316	-1.31348	0.198946	-6.60216	4.05204e-11	9.8261e-11	-1.60459	0.221363	-7.24867	4.20872e-13	1.246e-12	84.9892	12.2631	14.9984
TMEM132A	6075.98	2.15641	0.113368	19.0213	1.1365e-80	2.87014e-79	2.24652	0.125779	17.8609	2.37913e-71	7.67124e-70	1448.29	6872.82	6456.69
TAC1	43.0108	-1.52899	0.248239	-6.15936	7.30405e-10	1.65399e-09	-1.32735	0.275521	-4.81758	1.45306e-06	2.8811e-06	103.002	41.0516	35.7115
CX3CL1	5808.96	-2.32185	0.143	-16.2367	2.77389e-59	3.97733e-58	-2.5702	0.158671	-16.1983	5.17993e-59	1.04195e-57	21745.7	3661.61	4349.37
TNFRSF12A	2895.59	1.04358	0.111926	9.32385	1.12191e-20	4.18886e-20	1.00753	0.124182	8.11335	4.92417e-16	1.70396e-15	1487.57	2990.86	3066.48
BAIAP2L1	2490.97	1.11531	0.077826	14.3308	1.40506e-46	1.37706e-45	1.04073	0.0863414	12.0536	1.85569e-33	1.41929e-32	1224.26	2518.98	2652.54
GGCT	4803.6	1.37553	0.0822718	16.7193	9.48498e-63	1.48989e-61	1.42758	0.0912771	15.6401	3.88421e-55	6.73355e-54	1951.65	5249.84	5063.7
DBF4	903.252	1.2177	0.072637	16.7642	4.46242e-63	7.0491e-62	1.12669	0.0805582	13.986	1.89753e-44	2.27008e-43	415.787	908.183	967.291
GTF2IRD1	2251.48	1.08236	0.0528285	20.4881	2.74989e-93	9.71495e-92	1.09936	0.0585969	18.7613	1.56455e-78	6.06365e-77	1116.57	2392.17	2364.13
DNAH9	63.4754	-1.54057	0.18643	-8.26352	1.41439e-16	4.44842e-16	-1.78291	0.207032	-8.61174	7.19574e-18	2.7204e-17	162.054	47.0745	55.6993
SLC13A2	419.638	-1.95744	0.240606	-8.13544	4.10436e-16	1.26167e-15	-1.37732	0.26697	-5.15909	2.4815e-07	5.17726e-07	1182.38	455.122	304.433
GAS7	3027.89	-1.12376	0.103632	-10.8438	2.13485e-27	1.0613e-26	-1.05834	0.114988	-9.20391	3.45159e-20	1.45372e-19	5879.55	2823.15	2698.1
CEACAM7	54.6605	1.79214	0.229715	7.80157	6.11411e-15	1.79193e-14	1.78514	0.2545	7.01431	2.31089e-12	6.58161e-12	16.7482	57.7935	69.818
SCN4A	256.383	-3.62505	0.154819	-23.4147	3.02748e-121	2.02924e-119	-3.44953	0.171853	-20.0726	1.28035e-89	6.82808e-88	1514.17	138.616	122.759
TKTL1	6.75443	-1.06365	0.207286	-5.13132	2.87718e-07	5.59541e-07	-1.90117	0.232538	-8.17573	2.94082e-16	1.0291e-15	14.1857	22.3922	9.9042
RPUSD1	1740.8	1.36308	0.0748925	18.2005	5.11282e-74	1.10329e-72	1.44997	0.0830719	17.4543	3.19027e-68	9.12866e-67	708.97	1937.03	1823.63
CACNA2D2	1239.16	1.21818	0.151468	8.04249	8.80327e-16	2.67087e-15	1.2333	0.168048	7.33899	2.15214e-13	6.48425e-13	564.483	1327.18	1313.35
BAIAP3	1193.02	1.00693	0.163711	6.15065	7.71674e-10	1.74563e-09	1.36636	0.181632	7.52268	5.36637e-14	1.66927e-13	584.845	1507.92	1175.37
PIGQ	4682.45	1.2078	0.0800841	15.0816	2.14041e-51	2.45414e-50	1.3059	0.0888503	14.6977	6.66648e-49	9.29318e-48	2112.28	5222.44	4879.03
SELE	692.12	-1.51961	0.169049	-8.98918	2.49089e-19	8.7936e-19	-1.43077	0.18758	-7.62751	2.39329e-14	7.58689e-14	1673.2	620.613	583.544
E2F2	621.068	2.61053	0.124444	20.9775	1.05258e-97	4.18723e-96	2.43239	0.137962	17.6309	1.42742e-69	4.31799e-68	113.66	613.63	694.261
SYN1	181.195	2.11174	0.174766	12.0832	1.29528e-33	8.13841e-33	1.89139	0.193737	9.7627	1.62761e-22	7.69645e-22	47.1931	192.265	203.752
CYB561	12233	1.27695	0.0838923	15.2213	2.55285e-52	3.01717e-51	1.40738	0.0930804	15.12	1.19552e-51	1.82375e-50	5238.19	13894.7	12693.7
CELSR3	914.989	2.4683	0.141343	17.4631	2.73533e-68	5.01272e-67	2.5352	0.15676	16.1725	7.88698e-59	1.57514e-57	177.597	1029.53	982.87
AASS	403.365	-1.82063	0.100913	-18.0416	9.19106e-73	1.92187e-71	-1.93211	0.112017	-17.2484	1.15127e-66	3.08245e-65	1164.03	304.93	329.591
MGST1	11240.4	-1.17908	0.123122	-9.57653	1.00365e-21	3.93655e-21	-1.17278	0.136612	-8.58477	9.10217e-18	3.42789e-17	22737.4	10085.5	10041.5
MMP25	349.885	1.37392	0.152639	9.00111	2.23448e-19	7.90837e-19	1.2585	0.16931	7.43315	1.06045e-13	3.24501e-13	146.715	351.125	380.361
MAPK8IP2	1937.26	2.66596	0.1471	18.1235	2.07812e-73	4.43061e-72	2.87686	0.163177	17.6302	1.4435e-69	4.3599e-68	320.119	2351.59	2031.69
REV3L	1998.03	-1.04232	0.0776077	-13.4307	3.99755e-41	3.23707e-40	-1.14975	0.0861187	-13.3508	1.17208e-40	1.21311e-39	3791.17	1708.44	1840.75
TENM1	89.9103	-1.93166	0.178208	-10.8394	2.23928e-27	1.11208e-26	-1.55376	0.19778	-7.856	3.96585e-15	1.3114e-14	257.793	87.8345	86.4612
PAX7	168.422	5.74957	0.421334	13.6461	2.12931e-42	1.80645e-41	5.73926	0.466136	12.3124	7.76672e-35	6.3101e-34	23.2728	207.311	187.515
MASP2	73.1055	-1.34404	0.109186	-12.3097	8.03292e-35	5.32408e-34	-1.50938	0.121361	-12.437	1.64484e-35	1.38285e-34	165.801	58.2153	65.558
IYD	193.518	1.31079	0.255621	5.12787	2.93046e-07	5.69449e-07	1.69492	0.283547	5.97756	2.26509e-09	5.39784e-09	116.343	250.211	191.735
MLXIPL	344.872	-3.5776	0.168018	-21.2929	1.32016e-100	5.52098e-99	-3.40994	0.186475	-18.2864	1.06295e-74	3.77568e-73	2004.47	188.647	167.928
ETV7	401.416	2.0683	0.132728	15.5831	9.48734e-55	1.20889e-53	1.71065	0.147176	11.6231	3.14432e-31	2.19162e-30	108.886	356.566	456.827
HHATL	11.3126	-2.83441	0.238474	-11.8856	1.40589e-32	8.49261e-32	-3.68648	0.266957	-13.8093	2.2408e-43	2.59355e-42	310.731	6.90834	9.19271
SEMA3G	2306.95	-2.88634	0.119547	-24.1441	8.62033e-129	7.05929e-127	-2.74692	0.132652	-20.7077	2.95157e-95	1.93853e-93	10525.8	1568.04	1423.57
NME1-NME2	63.4003	1.5853	0.130952	12.1059	9.82631e-34	6.21592e-33	1.46835	0.14487	10.1357	3.83616e-24	1.95067e-23	23.0797	63.7632	69.1331
DPF1	48.009	1.31633	0.119702	10.9968	3.96144e-28	2.03499e-27	1.20874	0.132352	9.13272	6.68015e-20	2.7747e-19	20.7095	48.1052	51.7739
SYT7	6358.93	1.07935	0.114766	9.40483	5.21167e-21	1.97297e-20	1.2039	0.127336	9.45449	3.24596e-21	1.43994e-20	3109.18	7162.51	6570.14
PLAUR	2248.74	1.73049	0.0992423	17.437	4.32324e-68	7.88578e-67	1.57687	0.110097	14.3226	1.58142e-46	2.04436e-45	741.579	2212.29	2460.76
ANLN	2599.4	3.32938	0.122476	27.1839	1.00734e-162	1.52834e-160	3.35086	0.135841	24.6675	2.38956e-134	4.49697e-132	280.844	2865.09	2822.71
DCN	46717.5	-2.04262	0.121862	-16.7618	4.64423e-63	7.32449e-62	-1.93096	0.135213	-14.2809	2.8789e-46	3.69238e-45	146368	38385.6	35526.9
CEP68	2363.37	-1.23766	0.0474713	-26.0717	7.63277e-150	8.73618e-148	-1.2179	0.0526823	-23.1177	3.07011e-118	3.57667e-116	4931.75	2119.98	2091.25
GABRA3	55.4721	4.36022	0.364113	11.9749	4.80956e-33	2.9518e-32	4.26757	0.402266	10.6088	2.7118e-26	1.52209e-25	3.03667	79.237	68.2009
BRCA1	1202.92	1.05786	0.0919503	11.5047	1.24941e-30	7.02486e-30	1.087	0.102004	10.6565	1.62654e-26	9.21943e-26	602.335	1279.5	1253.94
CALCOCO1	4873.93	-1.08405	0.0579841	-18.6956	5.37498e-78	1.25836e-76	-1.04144	0.0643401	-16.1864	6.28802e-59	1.26225e-57	9300.38	4518.32	4386.98
SLC7A14	6.99638	-2.69909	0.217218	-12.4258	1.89437e-35	1.28604e-34	-2.7078	0.242609	-11.1611	6.31759e-29	4.01976e-28	29.9924	4.60217	4.65828
CLDN11	696.055	-2.54014	0.142121	-17.8731	1.91049e-71	3.84693e-70	-2.2117	0.157705	-14.0243	1.1067e-44	1.33623e-43	2684.22	579.476	461.505
SLC25A39	8990	1.13936	0.0675848	16.8582	9.13549e-64	1.47768e-62	1.23027	0.0749849	16.4069	1.70644e-60	3.62632e-59	4244.54	9958.25	9349.83
GPRC5A	19668.1	2.31299	0.127326	18.1658	9.62219e-74	2.06497e-72	2.44835	0.141273	17.3306	2.76211e-67	7.60964e-66	4175	22786.9	20746.2
CD6	620.268	1.1914	0.135507	8.7922	1.46658e-18	5.0094e-18	1.02862	0.150327	6.84252	7.78144e-12	2.14716e-11	294.819	601.545	673.43
TACC3	2756.22	2.33168	0.0918843	25.3763	4.60447e-142	4.57456e-140	2.34855	0.10192	23.0429	1.73156e-117	1.97035e-115	591.762	3013.65	2978.47
DPEP1	90.279	2.40719	0.147111	16.3631	3.50754e-60	5.13075e-59	2.56999	0.162568	15.8087	2.71104e-56	4.90846e-55	17.9202	106.31	95.0115
CLCA4	45.0719	-3.20628	0.248995	-12.8769	6.07534e-38	4.45343e-37	-3.55918	0.276679	-12.864	7.18053e-38	6.57946e-37	242.373	20.5703	26.255
IGF1	243.965	-2.5541	0.143099	-17.8484	2.97322e-71	5.96839e-70	-2.4426	0.158832	-15.3785	2.28161e-53	3.70279e-52	972.941	178.939	165.666
SLC38A5	527.541	1.76382	0.130173	13.5498	7.94647e-42	6.59577e-41	1.69802	0.144369	11.7616	6.15377e-32	4.40372e-31	167.234	542.726	568.056
SLC11A1	434.809	1.33999	0.113902	11.7645	5.951e-32	3.51989e-31	1.30701	0.12632	10.3468	4.32812e-25	2.29194e-24	182.183	450.466	460.846
ATP1A2	899.534	-4.67287	0.212992	-21.9392	1.09716e-106	5.31526e-105	-4.10171	0.236339	-17.3552	1.80258e-67	4.99717e-66	6734.66	392.179	264.008
PHLDB1	5009.07	-1.34887	0.0708568	-19.0366	8.48571e-81	2.15133e-79	-1.30661	0.0786231	-16.6186	5.11115e-62	1.14065e-60	11076.5	4477.75	4348.59
MARCO	474.068	-1.41494	0.232601	-6.08311	1.17872e-09	2.63686e-09	-2.27506	0.258122	-8.81388	1.20884e-18	4.7215e-18	1193.37	246.568	447.521
PRDM11	674.318	-1.05493	0.067268	-15.6826	1.99043e-55	2.58677e-54	-1.10101	0.074663	-14.7464	3.24685e-49	4.58825e-48	1278.34	595.879	615.316
SYT13	3836.48	4.9363	0.255925	19.2881	6.75836e-83	1.81696e-81	5.04535	0.283905	17.7712	1.18034e-70	3.73208e-69	132.864	4388.43	4068.96
HGF	406.937	-1.13368	0.112148	-10.1087	5.05314e-24	2.18274e-23	-1.041	0.124454	-8.36452	6.03618e-17	2.18495e-16	791.748	384.762	360.979
ADGRA2	2462.46	-1.50368	0.0912644	-16.4761	5.45295e-61	8.19072e-60	-1.32189	0.101267	-13.0534	6.0736e-39	5.83566e-38	5803.66	2321.44	2046.67
SAMD4A	1144.12	-1.66865	0.0940188	-17.748	1.78557e-70	3.50172e-69	-1.82451	0.104338	-17.4865	1.81444e-68	5.24552e-67	3076.82	868.63	967.842
CPS1	361.038	-1.0054	0.150472	-6.68163	2.36304e-11	5.79421e-11	-1.63963	0.167009	-9.81758	9.45883e-23	4.52194e-22	718.532	230.615	357.906
FHL1	9299.6	-5.08639	0.142263	-35.7534	5.85237e-280	1.90904e-276	-4.85183	0.157854	-30.7363	1.86665e-207	4.56675e-204	76387.6	2645.32	2248.35
NLRP2	1888.57	1.36113	0.218004	6.24361	4.27592e-10	9.8122e-10	1.00788	0.241883	4.16679	3.08921e-05	5.54392e-05	819.339	1647.68	2104.84
EHD2	7429.12	-1.99904	0.0868786	-23.0096	3.7334e-117	2.26926e-115	-1.84437	0.0963991	-19.1327	1.34907e-81	5.75251e-80	22736.3	6331.54	5687.85
DEPDC1	786.257	3.27203	0.128545	25.4544	6.3153e-143	6.50542e-141	3.07154	0.142476	21.5583	4.42853e-103	3.6883e-101	91.2581	767.059	881.402
RRAGD	1091.93	-1.2471	0.115566	-10.7912	3.78666e-27	1.86494e-26	-1.33785	0.128238	-10.4326	1.76085e-25	9.49404e-25	2307.04	912.634	971.881
HSD17B6	304.889	2.96322	0.0974296	30.414	3.58855e-203	1.67226e-200	2.9972	0.107667	27.8376	1.52015e-170	1.29358e-167	42.2237	336.614	328.88
TYMP	6003.09	1.82371	0.107972	16.8906	5.27835e-64	8.58039e-63	1.80915	0.119794	15.1021	1.56762e-51	2.37841e-50	1827.47	6404.11	6469.01
VIM	62316.4	-1.4215	0.0885232	-16.058	5.02718e-58	6.99303e-57	-1.43174	0.098222	-14.5766	3.95626e-48	5.38469e-47	144412	53531.1	53912.4
KCNG1	334.305	2.40585	0.244944	9.82202	9.05142e-23	3.70151e-22	2.19481	0.27169	8.07837	6.5636e-16	2.25769e-15	70.8477	324.426	375.557
SH2D2A	262.465	1.75122	0.133704	13.0978	3.38938e-39	2.58523e-38	1.39581	0.148252	9.41511	4.72582e-21	2.07991e-20	88.3912	232.746	297.722
IBSP	159.799	6.98683	0.220966	31.6194	1.99697e-219	1.62853e-216	6.61141	0.23907	27.6548	2.44602e-168	1.70977e-165	1.4653	144.504	518.705
HMGB3	4673.63	2.38393	0.107711	22.1327	1.53057e-108	7.60314e-107	2.4954	0.119495	20.8829	7.65281e-97	5.23709e-95	946.58	5337.91	4940.99
BAK1	1395.32	1.00296	0.0630081	15.918	4.75273e-57	6.4285e-56	1.01515	0.0698874	14.5255	8.3551e-48	1.12081e-46	728.443	1472.29	1459.76
ARHGAP31	2412.66	-1.167	0.0774771	-15.0625	2.8557e-51	3.26852e-50	-1.18559	0.0859717	-13.7904	2.91035e-43	3.35067e-42	4859.11	2136.17	2163.92
EFCAB1	74.4946	-2.37125	0.19233	-12.329	6.31946e-35	4.20695e-34	-2.32103	0.213539	-10.8693	1.61356e-27	9.57859e-27	275.013	55.0428	53.1911
MYOC	194.118	-6.67375	0.292964	-22.7802	7.21309e-115	4.12791e-113	-7.43878	0.325843	-22.8293	2.34575e-115	2.52258e-113	1907.08	10.9853	182.741
DEPDC1B	364.42	2.96293	0.114089	25.9703	1.07206e-148	1.20588e-146	2.78447	0.126299	22.0466	1.0287e-107	9.36454e-106	52.3167	360.583	408.049
MYOM2	136.177	-2.7221	0.140498	-19.3746	1.26432e-83	3.45605e-82	-2.34151	0.155958	-15.0137	5.97292e-51	8.89665e-50	2781.62	264.037	291.654
OTC	2.54157	-3.44798	0.279086	-12.3545	4.60538e-35	3.07843e-34	-3.18667	0.312837	-10.1864	2.28092e-24	1.1714e-23	14.0678	1.54046	1.28426
CYP46A1	75.3228	-1.30245	0.104149	-12.5057	6.94714e-36	4.78092e-35	-1.05785	0.115642	-9.14761	5.82077e-20	2.42443e-19	157.383	75.683	63.898
SLC18A1	7.57115	1.38119	0.233411	5.91742	3.27033e-09	7.12931e-09	1.54179	0.256944	6.0005	1.96711e-09	4.70662e-09	3.08896	17.5976	23.0888
FLT4	940.507	-1.21856	0.0797115	-15.2871	9.32222e-53	1.11525e-51	-1.05815	0.088455	-11.9626	5.58183e-33	4.18573e-32	1904.26	914.571	818.293
TLL1	335.303	-1.42324	0.133353	-10.6727	1.36634e-26	6.57699e-26	-1.24046	0.147983	-8.38244	5.18432e-17	1.88321e-16	753.936	319.1	281.157
VCAN	24828.3	1.5204	0.119534	12.7195	4.61039e-37	3.28843e-36	1.57653	0.132628	11.8868	1.38591e-32	1.02089e-31	9095.78	27128.1	26093.1
C6	214.318	-3.24125	0.23388	-13.8586	1.12811e-43	9.95915e-43	-3.14507	0.259557	-12.1171	8.57615e-34	6.65817e-33	1122.81	126.898	118.729
RTN4R	319.565	1.31615	0.106774	12.3265	6.52292e-35	4.33798e-34	1.25491	0.11839	10.5998	2.9869e-26	1.67267e-25	137.251	327.606	341.748
MYO16	99.9987	-1.66145	0.176426	-9.41727	4.62986e-21	1.75816e-20	-1.67068	0.195843	-8.53073	1.45431e-17	5.41444e-17	263.038	82.5207	83.1563
AIFM2	1573.09	-1.80286	0.0843827	-21.3653	2.80836e-101	1.18715e-99	-1.86278	0.0936412	-19.8927	4.70534e-88	2.39202e-86	4488.2	1234.03	1286.35
RETSAT	7647.53	-1.72574	0.0727747	-23.7135	2.61506e-124	1.90267e-122	-1.65744	0.0807503	-20.5255	1.27377e-93	7.76642e-92	20615.6	6535.03	6232.83
CAPG	11198.9	1.11993	0.0858351	13.0474	6.57278e-39	4.96881e-38	1.10427	0.0952367	11.595	4.36925e-31	3.02494e-30	5457.82	11733.9	11861.9
ZIC2	140.189	2.99518	0.262662	11.4032	4.03017e-30	2.2213e-29	2.75547	0.291112	9.46533	2.92645e-21	1.30144e-20	19.9924	135.051	159.472
ADRB1	112.154	-1.1922	0.231443	-5.15117	2.5887e-07	5.04943e-07	-1.87136	0.256922	-7.28379	3.24574e-13	9.66758e-13	249.475	68.254	109.198
GPM6B	1189.62	-1.6478	0.130329	-12.6434	1.21724e-36	8.56663e-36	-1.88034	0.144622	-13.0018	1.19512e-38	1.13328e-37	3193.2	867.376	1019.07
MAGEC2	27.2205	5.68914	0.58162	9.78154	1.35142e-22	5.48868e-22	5.12976	0.64027	8.01186	1.12984e-15	3.83844e-15	0.635691	40.5227	89.06
PREX2	753.38	-2.38697	0.115547	-20.658	8.27504e-95	3.02162e-93	-2.22544	0.128225	-17.3557	1.78584e-67	4.95781e-66	2770.15	592.299	529.697
ARHGAP6	278.212	-1.35783	0.108141	-12.5561	3.6803e-36	2.54886e-35	-1.25694	0.120024	-10.4725	1.15596e-25	6.30207e-25	612.79	256.325	239.172
ROS1	24.6813	2.81943	0.277258	10.169	2.7271e-24	1.19193e-23	1.24656	0.307009	4.06032	4.90051e-05	8.66656e-05	5.85837	16.9932	106.773
LMO3	566.993	-1.34815	0.196467	-6.86198	6.79146e-12	1.70939e-11	-1.99179	0.21802	-9.1358	6.49228e-20	2.70011e-19	1359.85	341.885	534.112
GUCA1A	5.75766	1.81022	0.200903	9.01044	2.05231e-19	7.27149e-19	1.68461	0.219094	7.68899	1.48304e-14	4.75914e-14	1.7979	7.31602	6.31385
CELF2	2347.95	-1.92512	0.104044	-18.5029	1.95537e-76	4.47084e-75	-2.02943	0.115452	-17.5782	3.61966e-69	1.07994e-67	7145.02	1750.11	1881.38
ADAMTS6	214.616	1.16544	0.105057	11.0935	1.34957e-28	7.0644e-28	1.05355	0.116469	9.04574	1.48649e-19	6.08144e-19	102.838	213.27	230.693
UTS2	15.7174	2.23895	0.215404	10.3942	2.63458e-25	1.20561e-24	1.91077	0.237259	8.05351	8.04538e-16	2.75335e-15	3.77929	14.3813	18.0039
TNFRSF9	195.206	2.73219	0.148877	18.352	3.18096e-75	7.09086e-74	2.48741	0.164853	15.0886	1.92359e-51	2.90947e-50	33.071	185.631	219.993
EPN3	2763.86	2.14027	0.122799	17.429	4.96701e-68	9.03479e-67	2.31617	0.136232	17.0016	7.98786e-65	1.97397e-63	656.158	3267.97	2892.88
RFC2	2232.3	1.04233	0.0610213	17.0814	2.04244e-65	3.43129e-64	1.00654	0.0676916	14.8695	5.20137e-50	7.55202e-49	1147.33	2305.24	2362.95
FOXP3	350.674	2.17306	0.115134	18.8742	1.8584e-79	4.496e-78	2.039	0.127593	15.9805	1.74615e-57	3.3084e-56	85.7258	352.542	386.877
DKK3	3908.83	-1.24801	0.102522	-12.1731	4.32554e-34	2.77572e-33	-1.16638	0.113757	-10.2533	1.14424e-24	5.9498e-24	8122.22	3618.76	3419.72
NFE2L3	1829.68	1.2853	0.112564	11.4184	3.38521e-30	1.87374e-29	1.05148	0.124886	8.41947	3.78192e-17	1.38251e-16	822.178	1704.31	2004.05
SLC4A8	1686.85	1.63404	0.155978	10.4761	1.11187e-25	5.15311e-25	1.65804	0.173051	9.58124	9.58913e-22	4.36462e-21	578.307	1825.3	1795.2
PTGER3	2635.35	-1.3763	0.159585	-8.62425	6.45125e-18	2.14589e-17	-1.6676	0.177074	-9.41753	4.61828e-21	2.03395e-20	6175.07	1943.71	2378.62
TNIP3	46.9372	2.31003	0.195937	11.7896	4.4147e-32	2.61991e-31	1.68064	0.216831	7.75093	9.12248e-15	2.95995e-14	11.2228	36.1275	55.7813
HOMER3	1946.81	1.222	0.102425	11.9306	8.19705e-33	5.00102e-32	1.31305	0.113632	11.5552	6.94456e-31	4.77244e-30	870.108	2161.99	2029.58
RAD51	567.759	2.55422	0.0991597	25.7586	2.58079e-146	2.79067e-144	2.59412	0.109857	23.6137	2.78983e-123	3.92824e-121	104.106	628.721	611.504
POLQ	483.301	2.61109	0.110691	23.5889	5.01135e-123	3.47809e-121	2.44399	0.122649	19.9267	2.38774e-88	1.22018e-86	87.8885	478.278	537.055
PRSS8	12537.8	1.48516	0.103998	14.2806	2.89056e-46	2.79792e-45	1.59756	0.115389	13.845	1.36436e-43	1.59422e-42	4676.43	14152.6	13091.8
ALX4	241.997	-2.26976	0.200419	-11.325	9.86449e-30	5.36002e-29	-2.64644	0.222445	-11.897	1.22662e-32	9.06627e-32	888.368	141.863	184.24
FSTL4	285.114	1.75254	0.163768	10.7014	1.00288e-26	4.85611e-26	1.89578	0.181602	10.4392	1.64169e-25	8.87112e-25	88.4041	329.181	298.025
FOXN3	3540.6	-1.64558	0.0726739	-22.6433	1.62355e-113	9.10488e-112	-1.68886	0.0806424	-20.9426	2.19201e-97	1.55442e-95	9270.81	2875.34	2963.11
METTL24	26.706	-1.19998	0.126114	-9.51504	1.81643e-21	7.0287e-21	-1.20228	0.140272	-8.57101	1.02578e-17	3.85053e-17	54.582	23.6585	23.7625
NNAT	227.953	-3.59705	0.171496	-20.9746	1.11926e-97	4.44343e-96	-3.47214	0.190362	-18.2397	2.49756e-74	8.74459e-73	1339.07	120.666	110.732
LAMA3	3892.8	-1.7798	0.151373	-11.7577	6.44517e-32	3.80527e-31	-1.90618	0.167961	-11.349	7.50217e-30	4.95386e-29	11086.9	2957.97	3228.75
CBLN4	73.2757	-1.64541	0.155295	-10.5954	3.12972e-26	1.48353e-25	-1.34656	0.172377	-7.81169	5.64259e-15	1.8511e-14	183.523	72.1395	58.6653
RELT	487.677	1.53816	0.0849994	18.0961	3.41888e-73	7.26539e-72	1.40074	0.0942313	14.8649	5.56653e-50	8.07023e-49	183.357	483.907	532.207
KCNH2	323.311	2.31476	0.197635	11.7123	1.10235e-31	6.45386e-31	2.28458	0.21917	10.4238	1.9317e-25	1.04009e-24	70.5028	343.433	350.676
CYFIP2	2693.37	1.32519	0.116871	11.3389	8.4185e-30	4.58705e-29	1.4077	0.129665	10.8564	1.85939e-27	1.09912e-26	1120.25	2972.18	2807.04
CCDC85A	76.2886	-2.05819	0.154815	-13.2945	2.49099e-40	1.97064e-39	-2.04583	0.171929	-11.8993	1.19397e-32	8.83495e-32	245.172	59.3361	58.8519
NPFFR2	35.4956	1.65272	0.247528	6.67692	2.44015e-11	5.98104e-11	1.04777	0.274387	3.81858	0.000134222	0.000228673	13.2745	27.444	41.742
PHF21B	102.105	1.63148	0.255021	6.39744	1.58007e-10	3.71205e-10	1.63961	0.282804	5.7977	6.72291e-09	1.55441e-08	35.4238	110.433	117.801
GYG2	2310.19	-4.09862	0.131323	-31.2102	7.74764e-214	5.22886e-211	-4.21955	0.145728	-28.955	2.43078e-184	2.79855e-181	15876.2	852.203	926.704
F7	476.537	2.76494	0.203629	13.5783	5.38471e-42	4.50191e-41	2.87149	0.225822	12.7157	4.8356e-37	4.25933e-36	75.0403	549.576	510.424
LAMC2	5144.04	-1.25051	0.164554	-7.59937	2.97565e-14	8.42461e-14	-1.47595	0.182585	-8.08365	6.28588e-16	2.16559e-15	11143.1	4005.97	4683.41
RASGRF1	238.69	1.26509	0.175819	7.1954	6.22793e-13	1.64988e-12	1.53248	0.194996	7.85904	3.87094e-15	1.28171e-14	98.9068	286.248	237.816
ATP2B4	10458.6	-1.09053	0.0774091	-14.0879	4.50811e-45	4.17373e-44	-1.13681	0.0858915	-13.2355	5.47608e-40	5.51043e-39	20220.5	9195.34	9495.16
YBX3	8119.14	-1.04512	0.107396	-9.73144	2.21437e-22	8.8975e-22	-1.254	0.119164	-10.5233	6.74462e-26	3.70802e-25	15666.7	6568.81	7592.1
COL11A1	12007.3	6.14384	0.178194	34.4783	1.69643e-260	4.15031e-257	6.11452	0.197657	30.935	4.03806e-210	1.12904e-206	185.633	12863.4	13127.5
SPAG4	323.249	1.54454	0.117774	13.1144	2.72224e-39	2.08449e-38	1.72233	0.130565	13.1913	9.8412e-40	9.7872e-39	114.548	378.204	334.432
DGAT2	3925.1	-3.37996	0.153658	-21.9967	3.09934e-107	1.52413e-105	-3.20648	0.170497	-18.8067	6.65969e-79	2.6121e-77	21364.7	2314.65	2052.23
SEZ6	56.3961	2.92254	0.279413	10.4596	1.3245e-25	6.11826e-25	1.28202	0.309729	4.13915	3.48598e-05	6.23426e-05	13.5422	166.047	175.071
LIMCH1	5352.44	-1.18312	0.108502	-10.9041	1.10172e-27	5.54741e-27	-1.2626	0.120392	-10.4874	9.86708e-26	5.39437e-25	10976.9	4574.98	4834.14
DLX3	300.244	1.48831	0.162433	9.16257	5.06771e-20	1.84085e-19	1.57864	0.180151	8.76286	1.90366e-18	7.3706e-18	112.193	335.22	314.898
WISP2	2100.65	-1.7295	0.164104	-10.5391	5.70513e-26	2.67451e-25	-1.34067	0.182085	-7.36291	1.79939e-13	5.4462e-13	5391.8	2128.97	1625.95
DMRT3	68.1731	-1.17044	0.144289	-8.11176	4.98919e-16	1.52671e-15	-1.62566	0.160341	-10.1388	3.7166e-24	1.89233e-23	146.07	47.3166	64.9506
ATP2C2	1146.97	1.21925	0.128197	9.51079	1.89227e-21	7.30771e-21	1.37652	0.142221	9.67874	3.71269e-22	1.726e-21	506.566	1315.41	1179.56
NGFR	1140.73	-2.00539	0.164222	-12.2115	2.69953e-34	1.74835e-33	-1.84671	0.182221	-10.1345	3.88553e-24	1.97526e-23	3503.28	974.029	872.575
LPAR2	1296.11	1.16528	0.0752586	15.4836	4.4741e-54	5.57752e-53	1.07609	0.0834806	12.8902	5.10819e-38	4.71148e-37	618.547	1304.51	1387.6
SNCAIP	284.371	-1.12853	0.138524	-8.1468	3.73692e-16	1.15089e-15	-1.00446	0.153721	-6.53428	6.39167e-11	1.67512e-10	548.413	273.375	250.957
BCAS1	2495.47	2.37363	0.191656	12.3848	3.15841e-35	2.12866e-34	2.59118	0.212636	12.186	3.69148e-34	2.90626e-33	502.907	3030.67	2606.45
CALCRL	2049.42	-1.1194	0.101928	-10.9822	4.65654e-28	2.38706e-27	-1.00154	0.1131	-8.85541	8.33756e-19	3.28666e-18	3949.86	1972.61	1817.88
NTHL1	1092.66	1.18392	0.0976032	12.1299	7.33036e-34	4.65962e-33	1.41621	0.108267	13.0807	4.24404e-39	4.106e-38	488.206	1302.94	1109.06
GLP2R	36.6536	-3.22186	0.214531	-15.0181	5.58513e-51	6.33693e-50	-4.21651	0.239114	-17.6339	1.35266e-69	4.09817e-68	204.549	11.0069	22.1376
MCM10	802.512	3.141	0.133403	23.5452	1.40677e-122	9.59348e-121	3.01665	0.147886	20.3984	1.72697e-92	1.01199e-90	101.095	818.011	891.65
MYLK	9881.76	-2.21191	0.111456	-19.8456	1.20207e-87	3.61953e-86	-2.30804	0.123669	-18.663	9.89466e-78	3.75307e-76	34496.8	6966.05	7446.03
TMEM206	817.948	1.41928	0.0696944	20.3643	3.46906e-92	1.19536e-90	1.33696	0.077276	17.3011	4.61375e-67	1.26118e-65	329.417	832.361	881.156
COL17A1	3789.19	-3.0344	0.209876	-14.4581	2.22963e-47	2.24708e-46	-2.34735	0.232871	-10.0801	6.76846e-24	3.39673e-23	17107.9	3361.88	2088.09
ME1	1525.33	-1.65721	0.145614	-11.3809	5.20807e-30	2.85845e-29	-1.49763	0.161572	-9.26912	1.87689e-20	8.01713e-20	3907.15	1383.59	1238.75
MTHFD2	6074.91	1.47451	0.0752309	19.5998	1.55137e-85	4.44559e-84	1.39785	0.0834659	16.7476	5.89702e-63	1.35944e-61	2353.51	6201.76	6540.23
CTNNA2	25.7023	2.30714	0.280769	8.21723	2.08252e-16	6.49651e-16	1.4643	0.310918	4.70961	2.48189e-06	4.84448e-06	7.45848	46.4473	78.0735
ASPM	1843.48	3.52683	0.124995	28.2159	3.73633e-175	8.03599e-173	3.37353	0.138607	24.3388	7.62523e-131	1.33251e-128	179.185	1857.24	2065.47
CLDN18	14.7383	-1.00425	0.139239	-7.21239	5.49782e-13	1.45982e-12	-1.45197	0.155572	-9.33309	1.02828e-20	4.44861e-20	28.2433	33.7703	14.3731
KIF26A	376.601	-1.30032	0.114952	-11.3118	1.14647e-29	6.21744e-29	-1.21123	0.12757	-9.49464	2.20978e-21	9.87665e-21	805.22	347.766	326.958
ACSM2B	2.97875	-2.98168	0.21091	-14.1372	2.23932e-45	2.09009e-44	-2.74032	0.237028	-11.5611	6.48378e-31	4.4699e-30	13.7986	2.06584	2.93547
KLF6	12783.1	-1.35435	0.0757044	-17.8899	1.41325e-71	2.86932e-70	-1.38105	0.0839999	-16.4411	9.70725e-61	2.08551e-59	28537.2	10956.4	11161.3
PLPP1	2114.39	-1.81218	0.0766099	-23.6546	1.05748e-123	7.52619e-122	-1.66705	0.085011	-19.6098	1.27533e-85	6.11784e-84	5906.01	1859.81	1681.82
SYT1	2069.23	2.9151	0.228948	12.7326	3.89767e-37	2.78413e-36	2.87228	0.254006	11.308	1.19855e-29	7.85071e-29	300.654	2201.63	2267.91
ROGDI	2598.5	1.46949	0.0828133	17.7447	1.89541e-70	3.7134e-69	1.61051	0.0918683	17.5307	8.3578e-69	2.43421e-67	976.665	2982.48	2704.69
ATP2B3	7.68304	1.73028	0.272083	6.35941	2.02533e-10	4.72803e-10	1.56109	0.299987	5.20386	1.95195e-07	4.10483e-07	2.58213	9.12596	14.9768
FGFR3	1835.94	2.45107	0.170899	14.3422	1.19156e-46	1.17074e-45	2.18981	0.189599	11.5497	7.40572e-31	5.084e-30	380.91	1738.02	2082.99
ACSL4	2510.08	-1.21721	0.0920324	-13.2259	6.21911e-40	4.85135e-39	-1.33755	0.102122	-13.0976	3.39878e-39	3.30128e-38	5268.71	2084.7	2266.07
PRR11	1112.06	2.60526	0.127673	20.4058	1.48481e-92	5.1435e-91	2.48319	0.141596	17.5371	7.45759e-69	2.18503e-67	202.272	1736.01	1230.74
REEP1	1245.54	1.15421	0.146592	7.87362	3.44528e-15	1.01998e-14	1.27306	0.162637	7.8276	4.97267e-15	1.63682e-14	576.598	1393.49	1283.27
STON1-GTF2A1L	5.93722	-2.32615	0.163595	-14.2189	6.99491e-46	6.64585e-45	-2.38106	0.18378	-12.956	2.17256e-38	2.03646e-37	21.7731	4.16956	4.34907
PYGM	112.527	-3.4171	0.114453	-29.8559	7.36592e-196	2.94216e-193	-3.21159	0.127183	-25.2517	1.0836e-140	2.61831e-138	9206.47	115.909	58.0614
PAGE1	1.51071	2.65172	0.786059	3.37344	0.000742356	0.00114612	3.02442	0.868221	3.48347	0.000494963	0.000804603	0.135609	17.8777	35.157
PITX1	1929.29	3.77268	0.165542	22.79	5.76786e-115	3.3399e-113	3.91767	0.183601	21.3379	5.04784e-101	4.06569e-99	150.595	2274.73	2057.17
ADGRF5	2666.35	-1.99475	0.0845064	-23.6048	3.44242e-123	2.41488e-121	-1.864	0.0937712	-19.8782	6.29096e-88	3.18157e-86	8165.09	2242.99	2048.64
BCL3	3916.76	1.00001	0.0759047	13.1746	1.22954e-39	9.48545e-39	1.0759	0.0842132	12.7759	2.23405e-37	2.00481e-36	2030.1	4279.71	4060.17
ABCC9	959.089	-2.42825	0.110811	-21.9135	1.93038e-106	9.23751e-105	-2.26786	0.122967	-18.4428	5.95408e-76	2.19874e-74	3587.97	744.911	666.563
GAL	189.515	2.55024	0.221799	11.498	1.34988e-30	7.58104e-30	2.12872	0.245916	8.65632	4.87246e-18	1.85526e-17	37.1247	226.516	217.448
DRD4	48.8716	1.4214	0.132805	10.7029	9.86713e-27	4.78018e-26	1.53038	0.146797	10.4252	1.90345e-25	1.02516e-24	19.049	54.8965	50.9442
TGFBR3	4444.64	-2.46156	0.147637	-16.673	2.05945e-62	3.20664e-61	-2.53413	0.163816	-15.4694	5.58171e-54	9.31331e-53	17377.8	3000.11	3154.92
PLA2G10	35.9132	1.84234	0.159437	11.5553	6.94123e-31	3.94465e-30	1.65508	0.176133	9.39674	5.62817e-21	2.46707e-20	11.0536	34.837	39.7217
HES2	363.007	1.85344	0.192277	9.63945	5.4477e-22	2.15791e-21	2.13915	0.213258	10.0308	1.11559e-23	5.55017e-23	102.467	451.557	370.358
SCT	37.5334	3.78611	0.179024	21.1486	2.84349e-99	1.16672e-97	3.78588	0.1951	19.4048	7.03079e-84	3.16337e-82	3.10694	41.0365	41.0876
SPTB	141.665	-1.70724	0.13158	-12.9749	1.69871e-38	1.26752e-37	-1.57908	0.146062	-10.811	3.05281e-27	1.78837e-26	760.589	125.333	114.752
FRMPD1	64.4032	-1.2039	0.161444	-7.45707	8.84668e-14	2.44351e-13	-1.23852	0.179251	-6.90941	4.86664e-12	1.35916e-11	133.295	56.4706	57.8423
PTPN21	1294.93	-1.46643	0.0853138	-17.1886	3.23032e-66	5.51691e-65	-1.50325	0.094674	-15.8781	8.98107e-57	1.6693e-55	3078.86	1085.98	1114.12
CAMK2A	34.422	1.24316	0.13155	9.45012	3.38445e-21	1.29174e-20	1.11686	0.145434	7.67949	1.5972e-14	5.10959e-14	290.18	37.5872	37.1274
EPHA8	74.9898	3.64181	0.260527	13.9786	2.10535e-44	1.90768e-43	3.81989	0.287919	13.2672	3.5857e-40	3.6306e-39	6.33664	89.9253	79.4786
SLC12A3	24.9135	1.23768	0.183505	6.7447	1.53347e-11	3.79527e-11	1.0182	0.203151	5.01204	5.38566e-07	1.09983e-06	14.492	23.5082	45.4674
TRPM5	7.33459	2.53856	0.238559	10.6412	1.91589e-26	9.16592e-26	2.3215	0.260029	8.92783	4.34441e-19	1.74132e-18	1.43579	25.3749	18.1068
ARHGAP10	958.403	-1.41646	0.0879592	-16.1036	2.40877e-58	3.38195e-57	-1.33619	0.0976093	-13.6892	1.17804e-42	1.32357e-41	2190.08	867.358	820.5
TRIP13	1187.69	2.58844	0.111536	23.2071	3.85761e-119	2.43552e-117	2.42397	0.123689	19.5973	1.63045e-85	7.80223e-84	219.873	1180.13	1322.59
ATP6AP1	17412.4	1.19398	0.0613575	19.4594	2.42482e-84	6.77012e-83	1.30583	0.0680771	19.1817	5.26748e-82	2.25591e-80	7903.77	19540.4	18082.6
MYO3B	188.367	2.57852	0.219882	11.7268	9.28721e-32	5.45362e-31	1.62442	0.243836	6.66194	2.70228e-11	7.22134e-11	39.2065	281.782	424.048
CYBRD1	19968.9	-1.14985	0.126847	-9.06486	1.24765e-19	4.45927e-19	-1.1736	0.140744	-8.33855	7.52092e-17	2.70836e-16	39817.3	17651.4	17944.5
LIMS2	1422.8	-2.03788	0.0938109	-21.7232	1.23793e-104	5.66093e-103	-1.8932	0.1041	-18.1864	6.61328e-74	2.29495e-72	4443.24	1196.25	1082.09
SPEG	1167.36	-1.04409	0.129114	-8.08659	6.13561e-16	1.87079e-15	-1.12689	0.143268	-7.86565	3.67196e-15	1.21727e-14	2218.22	1015.73	1075.7
TFRC	9384.02	1.04112	0.10114	10.2938	7.5159e-25	3.37079e-24	1.10126	0.112219	9.81349	9.84977e-23	4.70654e-22	4725.31	10137.7	9723.75
SREBF1	19127.9	1.13128	0.105562	10.7167	8.49629e-27	4.12629e-26	1.30965	0.117126	11.1815	5.02383e-29	3.21223e-28	8912.55	22092.4	19523.1
HMMR	869.302	3.03254	0.106137	28.572	1.49592e-179	3.90375e-177	2.95679	0.117621	25.1383	1.89939e-139	4.22442e-137	116.58	904.899	953.666
TRHDE	64.1926	-4.11501	0.211091	-19.494	1.23503e-84	3.483e-83	-4.02719	0.234517	-17.1723	4.28026e-66	1.114e-64	437.419	26.8468	25.2456
MCM2	3909.78	1.79998	0.0909003	19.8017	2.87842e-87	8.57481e-86	1.75249	0.100846	17.3779	1.21395e-67	3.39907e-66	1214.49	4092.1	4228.97
PANX2	341.344	1.80104	0.149832	12.0204	2.77576e-33	1.71813e-32	1.72583	0.166158	10.3867	2.85062e-25	1.52396e-24	106.546	352.523	371.354
TP63	1322.06	-2.63214	0.184317	-14.2805	2.89334e-46	2.79923e-45	-2.37503	0.204517	-11.6129	3.54348e-31	2.46457e-30	5353.75	1032.1	863.596
LLGL2	5852.71	1.73413	0.0844818	20.5267	1.24407e-93	4.41105e-92	1.79886	0.093728	19.1923	4.29177e-82	1.85019e-80	1865.81	6492.4	6207.51
FERMT2	3718.6	-1.959	0.0829796	-23.6082	3.17367e-123	2.23436e-121	-2.00812	0.092077	-21.8091	1.90027e-105	1.6678e-103	11433.5	2842.18	2940.7
ABCB11	11.9034	-2.04111	0.226794	-8.99983	2.26069e-19	7.99967e-19	-2.4362	0.252782	-9.63754	5.55e-22	2.55768e-21	39.5161	7.29603	9.56525
DHRS9	132.253	-1.16938	0.161415	-7.24454	4.3392e-13	1.15925e-12	-1.31804	0.17917	-7.35635	1.89001e-13	5.71207e-13	272.083	109.121	196.323
PTGS2	573.336	-1.32132	0.218181	-6.05608	1.39481e-09	3.11031e-09	-2.39729	0.242125	-9.90107	4.11859e-23	2.00321e-22	1415.29	268.763	566.395
MRPS34	4329.31	1.36142	0.0778723	17.4828	1.93783e-68	3.58141e-67	1.49044	0.0863936	17.2517	1.08655e-66	2.92115e-65	1754.09	4928.37	4506.62
PPP2R2C	1313.95	3.44222	0.212152	16.2253	3.34155e-59	4.78776e-58	3.58713	0.235326	15.2433	1.825e-52	2.88521e-51	128.27	1541.63	1394.32
CDHR2	35.3503	1.59361	0.131421	12.126	7.69272e-34	4.8852e-33	1.64211	0.144941	11.3295	9.37143e-30	6.16737e-29	12.3561	38.5422	37.3372
SNCB	5.43226	2.14404	0.257228	8.33519	7.7372e-17	2.45792e-16	2.06729	0.280931	7.35871	1.857e-13	5.6149e-13	2.06117	6.45254	7.21079
ATP2A3	5961.37	1.54255	0.12945	11.9162	9.74557e-33	5.92361e-32	1.73057	0.143627	12.0491	1.9608e-33	1.49734e-32	2112.49	7010.52	6153.89
CA12	25703.1	1.70398	0.159803	10.663	1.51596e-26	7.28287e-26	1.78755	0.17731	10.0815	6.67104e-24	3.34955e-23	8343.08	28802.8	27181.8
MGLL	6699.94	-2.28457	0.11061	-20.6542	8.94094e-95	3.2587e-93	-2.08421	0.122731	-16.9819	1.11752e-64	2.75816e-63	23366.6	5510.46	4795.85
SLC12A1	115.77	1.13452	0.246196	4.60821	4.06157e-06	7.34143e-06	1.51127	0.27305	5.53476	3.11654e-08	6.90244e-08	52.0457	148.394	114.32
MYDGF	5038.47	1.00637	0.0695216	14.4757	1.72657e-47	1.75e-46	1.06487	0.077132	13.8059	2.34952e-43	2.71457e-42	2613.59	5467.85	5250.35
WSCD2	100.195	-1.67862	0.194682	-8.62239	6.55681e-18	2.18026e-17	-2.09482	0.216154	-9.6913	3.2832e-22	1.53143e-21	278.483	65.1562	87.0022
SEMA3A	233.985	-1.66851	0.124665	-13.384	7.50303e-41	6.02335e-40	-1.77866	0.138386	-12.8529	8.28609e-38	7.56556e-37	625.492	182.306	196.956
GTSE1	731.433	3.05035	0.113825	26.7986	3.35655e-158	4.62636e-156	2.96567	0.126136	23.5117	3.09495e-122	4.06539e-120	97.7244	763.014	809.103
CELSR1	13521.4	1.48936	0.118815	12.5351	4.79608e-36	3.31224e-35	1.64137	0.13183	12.4506	1.38717e-35	1.16923e-34	4997.27	15589.8	14030.8
CACNG4	5422.03	2.33727	0.178411	13.1005	3.27122e-39	2.49705e-38	2.57046	0.197949	12.9855	1.47908e-38	1.39646e-37	1113.9	6616.71	5629.18
PLD1	1115.03	-1.04961	0.103922	-10.0999	5.52985e-24	2.38497e-23	-1.23408	0.115321	-10.7013	1.00379e-26	5.73274e-26	2145.3	912	1036.4
WDR62	777.298	2.87776	0.100776	28.5558	2.37685e-179	6.11562e-177	2.77991	0.111669	24.8942	8.60757e-137	1.70169e-134	233.458	799.865	855.948
TUBA3D	348.418	3.28105	0.218837	14.9931	8.14163e-51	9.15793e-50	2.74239	0.242634	11.3026	1.27393e-29	8.33333e-29	57.4214	348.689	447.029
PAX2	115.414	2.52589	0.234395	10.7762	4.45859e-27	2.18815e-26	2.53732	0.259741	9.76866	1.53466e-22	7.25865e-22	21.7857	126.592	125.561
RBMS2	2600.76	-1.17158	0.0536828	-21.824	1.37187e-105	6.45439e-104	-1.20923	0.059573	-20.2983	1.33071e-91	7.57114e-90	5261.72	2275.63	2335.96
SPAG5	2090.28	2.8163	0.107068	26.3039	1.7303e-152	2.07763e-150	2.72258	0.118749	22.9272	2.48771e-116	2.79824e-114	328.622	2169.26	2314.87
TPD52	15779.1	1.81975	0.0963549	18.8859	1.49002e-79	3.61819e-78	2.02408	0.106908	18.9329	6.10938e-80	2.46542e-78	4624.54	18809.9	16326
ACACB	3805.06	-3.71182	0.122902	-30.2015	2.26422e-200	1.00717e-197	-3.55314	0.136373	-26.0545	1.19634e-149	3.71661e-147	23054	1964	1759.43
MCAM	8846.73	-2.1847	0.0862821	-25.3205	1.90151e-141	1.87962e-139	-2.19669	0.0957377	-22.9449	1.65688e-116	1.87448e-114	30257.2	6600.3	6655.27
GPC4	3724.77	1.1386	0.122437	9.29949	1.41122e-20	5.24604e-20	1.00974	0.135846	7.43293	1.06219e-13	3.24982e-13	1821.51	3667.56	4010.26
CAMSAP3	2465.93	1.09958	0.0920864	11.9407	7.2571e-33	4.43585e-32	1.14884	0.102165	11.245	2.44984e-29	1.58716e-28	1202.94	2667.72	2578.06
STXBP2	3273.31	1.43124	0.0823466	17.3807	1.15491e-67	2.06617e-66	1.5067	0.0913553	16.4927	4.1391e-61	8.98119e-60	1276.83	3628.79	3443.69
NMRK2	1.74252	-1.99432	0.269827	-7.39113	1.45591e-13	3.97809e-13	-2.27327	0.304848	-7.45706	8.84727e-14	2.71536e-13	114.412	5.87611	2.51495
CTTNBP2	315.903	-1.26811	0.159436	-7.95373	1.80979e-15	5.4219e-15	-1.22333	0.176926	-6.91434	4.70047e-12	1.31331e-11	667.254	285.704	325.573
ACTL6B	5.13064	2.11068	0.337465	6.25451	3.98772e-10	9.16805e-10	1.58735	0.371824	4.26907	1.96286e-05	3.57534e-05	1.44036	31.1359	30.6243
UBE2T	1346.53	3.21681	0.105153	30.5917	1.57742e-205	7.91622e-203	3.19927	0.116564	27.4464	7.66911e-166	5.00332e-163	158.85	1459	1476.73
PPP1R12B	3765.83	-2.13687	0.0756403	-28.2504	1.40908e-175	3.09872e-173	-2.09755	0.0839337	-24.9905	7.75398e-138	1.64958e-135	12500.8	2920.76	2842.38
PAK3	246.077	-2.49047	0.15206	-16.3782	2.73743e-60	4.02834e-59	-2.91939	0.16882	-17.2929	5.32256e-67	1.45088e-65	1006.75	133.085	179.181
SPAG6	339.6	2.3895	0.30081	7.94355	1.96473e-15	5.87796e-15	2.27816	0.333691	6.82715	8.66156e-12	2.38296e-11	71.6434	408.65	375.497
APBB1IP	1117.06	-1.27693	0.09648	-13.2352	5.49283e-40	4.29336e-39	-1.37376	0.107064	-12.8312	1.09627e-37	9.96108e-37	2418.88	933.349	998.136
ACTN2	99.5874	2.3846	0.230851	10.3296	5.17696e-25	2.33518e-24	2.51627	0.255773	9.83792	7.7291e-23	3.71315e-22	10225.5	260.724	121.896
NAALAD2	110.411	-2.96009	0.0990676	-29.8795	3.62994e-196	1.48011e-193	-2.95051	0.110164	-26.7829	5.10624e-158	2.27135e-155	525.889	67.9532	67.5785
JADE1	2377.67	-1.11399	0.0604551	-18.4267	8.0237e-76	1.81549e-74	-1.07662	0.0670854	-16.0484	5.86356e-58	1.13066e-56	4619.86	2190.38	2134.39
SMC1B	122.005	2.3516	0.195702	12.0162	2.91936e-33	1.80587e-32	2.06301	0.216859	9.51318	1.84924e-21	8.29554e-21	27.0885	113.327	138.389
LAMP3	837.876	1.94299	0.174323	11.1459	7.49901e-29	3.96463e-28	1.73631	0.193389	8.97836	2.74834e-19	1.11069e-18	240	799.828	923.001
FAP	2556.84	1.56844	0.112697	13.9173	4.97491e-44	4.45625e-43	1.71273	0.12503	13.6986	1.03565e-42	1.16493e-41	892.668	2925.88	2647.47
HOXA9	248.098	-1.34629	0.175545	-7.66918	1.73093e-14	4.9471e-14	-1.6545	0.194826	-8.4922	2.02764e-17	7.51181e-17	572.16	181.736	225.028
EDN1	854.149	-1.36176	0.13809	-9.86138	6.12009e-23	2.52068e-22	-1.35546	0.15323	-8.84589	9.07996e-19	3.57356e-18	1909.42	746.253	742.982
ADCYAP1R1	210.842	-2.6696	0.147693	-18.0753	4.98918e-73	1.05224e-71	-2.58308	0.163942	-15.7561	6.23744e-56	1.1159e-54	885.112	147.772	139.253
P2RY10	160.985	1.35733	0.162084	8.37425	5.5578e-17	1.77624e-16	1.04479	0.179757	5.81223	6.1646e-09	1.4287e-08	70.1653	144.844	179.934
ITM2A	1749.03	-2.24674	0.127884	-17.5686	4.28788e-69	8.05398e-68	-2.21551	0.141904	-15.6128	5.95941e-55	1.02494e-53	6139.5	1321.89	1293.66
BRINP1	231.344	-1.61642	0.220504	-7.3306	2.29121e-13	6.19472e-13	-2.03548	0.244716	-8.31773	8.96635e-17	3.21763e-16	624.271	152.309	203.606
BPIFB2	559.254	1.0904	0.27768	3.92684	8.60687e-05	0.000142516	1.42941	0.308082	4.63971	3.48894e-06	6.73759e-06	327.077	2204.04	992.919
RUNX1T1	475.983	-1.76901	0.11348	-15.5887	8.68314e-55	1.10786e-53	-1.73657	0.125941	-13.7888	2.97648e-43	3.42479e-42	1317.35	395.297	386.838
SLC1A3	1202.71	-1.4291	0.108305	-13.1951	9.36482e-40	7.24746e-39	-1.49087	0.120183	-12.405	2.4547e-35	2.0444e-34	2803.89	997.579	1041.24
SP140	279.727	1.35117	0.131646	10.2637	1.02678e-24	4.58086e-24	1.09745	0.146004	7.51652	5.62522e-14	1.74812e-13	121.171	259.418	309.348
TNS1	15439.7	-3.14944	0.0889848	-35.393	2.18554e-274	6.11078e-271	-3.06106	0.0987358	-31.0025	4.98761e-211	1.62696e-207	78107.4	9358.76	8802.67
RAPGEF3	1159.53	-1.77466	0.102755	-17.2708	7.80956e-67	1.35624e-65	-1.46615	0.11402	-12.8587	7.68933e-38	7.02922e-37	3102.31	1122.95	906.712
DUSP13	39.1329	3.47366	0.250316	13.8771	8.7207e-44	7.72665e-43	4.03138	0.275485	14.6338	1.71071e-48	2.35457e-47	198.061	64.8158	41.823
LIPE	3726.15	-4.58337	0.157914	-29.0244	3.23841e-185	9.46002e-183	-4.41357	0.175223	-25.1883	5.38532e-140	1.2256e-137	28078.7	1317.55	1171.24
PAFAH1B3	3589.63	2.45171	0.088242	27.7839	6.7811e-170	1.24037e-167	2.57491	0.0978816	26.3064	1.62005e-152	6.09764e-150	697.543	4156.79	3816.34
KIF22	4338.25	1.44946	0.0669525	21.6491	6.20185e-104	2.77763e-102	1.50181	0.0742755	20.2195	6.60061e-91	3.63907e-89	1676.21	4747.27	4577.87
PGM1	4522.14	-1.26064	0.0816306	-15.4432	8.38417e-54	1.03726e-52	-1.32726	0.0905777	-14.6533	1.28391e-48	1.77588e-47	9662.01	3850.44	4032.35
EPB41L2	4662.31	-1.63887	0.0882377	-18.5734	5.279e-77	1.21554e-75	-1.87557	0.0979103	-19.156	8.6189e-82	3.68317e-80	12456.4	3394.48	3999.79
RIMS1	200.765	1.28483	0.215342	5.96645	2.42476e-09	5.32272e-09	1.52881	0.238854	6.40061	1.54753e-10	3.96433e-10	84.0799	242.63	204.94
DCT	40.4044	-2.55595	0.230875	-11.0707	1.73967e-28	9.0652e-28	-3.17179	0.256668	-12.3576	4.43283e-35	3.63314e-34	173.022	31.4443	29.4313
CRYBG3	1200.2	-1.90292	0.128919	-14.7606	2.62944e-49	2.83389e-48	-1.99208	0.143056	-13.9251	4.45691e-44	5.27392e-43	3598.33	904.471	962.261
SCTR	12.0202	-3.08035	0.153564	-20.059	1.68288e-89	5.30252e-88	-3.24186	0.172244	-18.8214	5.04594e-79	1.99111e-77	60.6524	6.39903	7.22585
PIH1D3	3.99433	2.26875	0.301473	7.52557	5.24927e-14	1.46686e-13	2.17227	0.328835	6.60596	3.94944e-11	1.04726e-10	0.906941	5.05255	5.0685
NDC80	923.93	3.23473	0.116946	27.6601	2.10744e-168	3.68275e-166	3.03831	0.129621	23.44	1.67365e-121	2.12706e-119	110.828	910.455	1043.17
CXCL2	296.437	-3.38601	0.184149	-18.3873	1.66074e-75	3.7404e-74	-3.54885	0.204397	-17.3625	1.58597e-67	4.41544e-66	1667.2	142.507	159.531
CDH7	98.7706	3.41379	0.283803	12.0288	2.50926e-33	1.55612e-32	2.70576	0.314384	8.60654	7.5298e-18	2.84449e-17	11.3184	112.02	128.799
MEF2C	1942.63	-1.39391	0.0831013	-16.7737	3.80191e-63	6.0203e-62	-1.39932	0.092214	-15.1747	5.19773e-52	8.04189e-51	4433.47	1680.59	1686.97
CDC14B	886.281	-1.82229	0.0825664	-22.0706	6.06368e-108	2.99693e-106	-1.95137	0.09164	-21.2939	1.2927e-100	1.01609e-98	2562.18	662.431	724.481
PCDHB4	309.448	-1.12582	0.118571	-9.4949	2.20416e-21	8.48875e-21	-1.11	0.13159	-8.43528	3.30408e-17	1.21009e-16	608.154	281.749	278.684
PCDHGA2	204.445	-1.17198	0.148573	-7.88821	3.06549e-15	9.09608e-15	-1.11898	0.164884	-6.78648	1.14904e-11	3.13129e-11	410.312	188.903	182.095
COBLL1	2794.05	-1.36596	0.0928013	-14.7192	4.85631e-49	5.1967e-48	-1.35086	0.102973	-13.1186	2.57754e-39	2.51358e-38	6259.44	2453.9	2428.41
TRPM3	21.0225	-2.81953	0.151588	-18.6	3.21483e-77	7.44623e-76	-2.68694	0.168852	-15.913	5.15022e-57	9.64593e-56	93.0721	14.4738	13.2652
P2RX5	91.7526	1.80427	0.181856	9.92141	3.35987e-23	1.39824e-22	1.52916	0.201542	7.5873	3.26642e-14	1.027e-13	39.7824	85.0184	102.912
EPYC	232.077	6.05546	0.232835	26.0075	4.06883e-149	4.62995e-147	6.0239	0.25612	23.5198	2.5583e-122	3.38318e-120	3.86191	250.991	256.59
FAM234B	6212.67	1.53181	0.155699	9.83826	7.70352e-23	3.16086e-22	1.88648	0.172753	10.9201	9.23614e-28	5.55872e-27	2152.89	7960	6225.12
SLCO1A2	64.4922	-2.25215	0.30918	-7.28428	3.23384e-13	8.68452e-13	-3.21811	0.343348	-9.37272	7.06848e-21	3.0846e-20	248.775	26.762	52.2171
NKAIN1	2677.95	3.94023	0.207633	18.9769	2.64721e-80	6.58337e-79	4.1369	0.23033	17.9607	3.95785e-72	1.29754e-70	185.357	3260.71	2845.17
APOB	114.828	-5.4713	0.223534	-24.4764	2.63514e-132	2.27203e-130	-5.78508	0.248551	-23.2752	7.90819e-120	9.6737e-118	1013.65	18.3854	22.878
EFR3B	620.575	1.31166	0.128604	10.1993	1.99788e-24	8.79698e-24	1.03022	0.142666	7.22117	5.1542e-13	1.5197e-12	275.825	563.18	684.515
MECOM	845.456	-1.28725	0.0968162	-13.2958	2.44747e-40	1.937e-39	-1.0979	0.107433	-10.2195	1.62257e-24	8.37745e-24	1771.59	827.639	725.826
IGSF9	3159.02	1.97998	0.104122	19.016	1.25676e-80	3.16975e-79	1.94067	0.115512	16.8005	2.41916e-63	5.69085e-62	869.042	3336.52	3428.66
ABCB1	357.026	-2.11362	0.122466	-17.2588	9.61545e-67	1.65956e-65	-1.858	0.135911	-13.6707	1.51929e-42	1.70015e-41	1140.41	314.601	263.514
WNT11	443.01	-1.21982	0.194209	-6.28097	3.36469e-10	7.77013e-10	-1.48552	0.215508	-6.89309	5.45944e-12	1.52038e-11	954.874	341.025	409.947
TTC39A	7437.98	1.36336	0.122345	11.1435	7.70023e-29	4.06662e-28	1.44681	0.135746	10.6582	1.59637e-26	9.05103e-26	3023	8241.06	7777.91
ORC1	391.859	2.3245	0.115862	20.0627	1.56323e-89	4.93477e-88	2.06838	0.128407	16.1081	2.23964e-58	4.42771e-57	87.9401	368.968	440.598
RAD54L	426.72	2.82559	0.115489	24.4663	3.37219e-132	2.89476e-130	2.60133	0.127927	20.3345	6.36565e-92	3.65362e-90	67.7313	411.075	480.166
EPDR1	832.039	-1.86089	0.109027	-17.0681	2.56264e-65	4.2905e-64	-1.83473	0.12099	-15.1643	6.09536e-52	9.40839e-51	2410.35	675.641	663.564
CEACAM6	12095.1	4.82474	0.257813	18.7141	3.7997e-78	8.93843e-77	4.79649	0.286042	16.7685	4.15162e-63	9.62742e-62	686.969	12813.7	13067.1
FAT2	1004.41	-2.18781	0.196783	-11.1179	1.02658e-28	5.39678e-28	-2.20904	0.218352	-10.1169	4.65126e-24	2.35353e-23	3445.25	745.164	756.209
PPEF1	186.079	1.15987	0.14167	8.18713	2.67527e-16	8.30589e-16	1.13213	0.157099	7.20647	5.74201e-13	1.68844e-12	87.6748	192.39	196.202
PPP1R15A	3716.39	-1.2359	0.0804147	-15.369	2.64047e-53	3.2079e-52	-1.34788	0.0892298	-15.1057	1.48447e-51	2.25926e-50	7886.19	3098.32	3348.34
BAX	2476.35	1.14894	0.0692094	16.6008	6.87123e-62	1.05312e-60	1.19901	0.0767769	15.6168	5.59448e-55	9.63018e-54	1169.68	2685.65	2593.88
CETP	126.119	-2.2689	0.116478	-19.4792	1.64771e-84	4.63347e-83	-2.18849	0.129361	-16.9177	3.33016e-64	8.09664e-63	443.615	97.4529	92.0531
MT3	12.8987	2.79268	0.270919	10.3082	6.47167e-25	2.91114e-24	1.76915	0.298649	5.92386	3.14476e-09	7.4281e-09	2.36047	10.3195	17.9105
LPCAT2	1510.31	-1.26962	0.0858684	-14.7857	1.81196e-49	1.96692e-48	-1.24299	0.0952849	-13.045	6.78869e-39	6.50995e-38	3201.69	1352.72	1327.95
AURKA	1477.32	3.07451	0.111592	27.5514	4.25531e-167	7.17973e-165	3.17128	0.12373	25.6306	6.95194e-145	1.94376e-142	187.867	1692.18	1582.38
DNMT3B	548.595	1.48524	0.107132	13.8637	1.05157e-43	9.29182e-43	1.48977	0.118809	12.5392	4.55411e-36	3.90079e-35	208.693	586.266	584.392
TPX2	4495.13	3.58968	0.114613	31.3199	2.50082e-215	1.74808e-212	3.45049	0.127132	27.1411	3.22919e-162	1.6632e-159	418.407	4573.76	5036.96
PDRG1	1872.01	1.12329	0.0723892	15.5174	2.64573e-54	3.313e-53	1.18259	0.0803014	14.7269	4.33045e-49	6.09313e-48	898.63	2039.97	1957.69
SLC15A1	135.339	1.91476	0.286804	6.6762	2.45223e-11	6.0099e-11	1.64687	0.318108	5.17707	2.25401e-07	4.71924e-07	39.6584	160.357	196.176
C20orf194	1513.49	-1.24019	0.0598223	-20.7312	1.81251e-95	6.79588e-94	-1.23272	0.0663893	-18.5681	5.82247e-77	2.18309e-75	3163.89	1346.05	1339.33
TESC	203.319	-1.76501	0.156381	-11.2866	1.52811e-29	8.24597e-29	-1.74348	0.173562	-10.0453	9.63897e-24	4.81137e-23	564.065	168.521	165.98
SIRPG	149.091	1.67196	0.165877	10.0795	6.80546e-24	2.92033e-23	1.44477	0.183906	7.856	3.96595e-15	1.3114e-14	51.9372	141.5	165.65
CFAP61	114.589	1.47539	0.150097	9.82956	8.39813e-23	3.43867e-22	1.53089	0.166329	9.20397	3.44971e-20	1.45325e-19	65.9219	125.941	121.145
OAS1	4255.59	1.41948	0.123313	11.5112	1.15899e-30	6.52582e-30	1.58045	0.136816	11.5516	7.2451e-31	4.97548e-30	1637.95	4898.51	4381.34
CHGB	554.573	2.70799	0.343486	7.88383	3.17494e-15	9.41657e-15	2.32007	0.381072	6.08828	1.1413e-09	2.77622e-09	257.091	8977.95	6239.49
NOS1	14.8756	-1.9837	0.18813	-10.5443	5.39781e-26	2.53287e-25	-2.24288	0.20965	-10.6982	1.03779e-26	5.91833e-26	222.054	15.0635	40.7919
GRAMD1A	5585.06	1.0917	0.0567055	19.252	1.35788e-82	3.60604e-81	1.01749	0.0629115	16.1734	7.76658e-59	1.55268e-57	2794.11	5656.31	5954.72
FXYD3	12950.3	1.42644	0.117048	12.1868	3.65565e-34	2.35434e-33	1.38958	0.129869	10.6998	1.0199e-26	5.82137e-26	5159.9	13519.3	13869.1
BIRC5	2765.01	3.57225	0.132577	26.9447	6.58573e-160	9.34029e-158	3.5185	0.147048	23.9276	1.58118e-126	2.38053e-124	257.137	2946.9	3058.7
LAG3	345.934	2.02904	0.156587	12.9579	2.12048e-38	1.57682e-37	1.86767	0.173643	10.7558	5.56462e-27	3.2184e-26	93.4515	341.132	381.502
OTUB2	253.309	1.0487	0.0788893	13.2934	2.52948e-40	2.00028e-39	1.04109	0.087424	11.9085	1.06834e-32	7.9233e-32	128.333	264.178	265.697
LTBP4	3700	-1.99629	0.0901113	-22.1536	9.62733e-109	4.83144e-107	-1.83221	0.0999878	-18.3243	5.29655e-75	1.90559e-73	11292.3	3171.34	2830.37
IRAK3	966.811	-1.1212	0.139297	-8.04896	8.34974e-16	2.53681e-15	-1.4842	0.154574	-9.60187	7.85074e-22	3.59006e-21	1992.45	712.124	915.914
LYZ	9267.08	1.40391	0.165958	8.45941	2.68734e-17	8.69367e-17	1.23586	0.184139	6.71157	1.92545e-11	5.18076e-11	3833.63	9029.02	10144.4
P3H2	612.618	-1.4437	0.124316	-11.6132	3.53328e-31	2.03034e-30	-1.519	0.137956	-11.0107	3.39261e-28	2.08412e-27	1448.99	505.655	591.058
THPO	157.968	1.7493	0.176442	9.9143	3.6079e-23	1.49987e-22	1.91375	0.195591	9.78445	1.31302e-22	6.22993e-22	48.9845	184.429	164.572
CHRD	1624.8	1.32136	0.158121	8.35663	6.45339e-17	2.0581e-16	1.61199	0.17543	9.18881	3.97217e-20	1.66867e-19	654.98	2002.08	1636.74
CD209	348.261	-2.6546	0.148202	-17.9121	9.49323e-72	1.93745e-70	-2.60232	0.164481	-15.8214	2.21556e-56	4.03001e-55	1456.32	239.879	231.276
KIF4A	1573.22	3.83491	0.113421	33.8114	1.3388e-250	2.62031e-247	3.77316	0.12571	30.0148	6.29102e-198	1.23128e-194	121.748	1664.5	1737.27
DLL3	39.0468	2.88267	0.240087	12.0068	3.27352e-33	2.02175e-32	2.24411	0.265382	8.45615	2.76357e-17	1.01594e-16	6.2196	29.5309	45.9796
NAT14	1235.56	1.72131	0.0975476	17.6458	1.09573e-69	2.0943e-68	1.7624	0.108197	16.2889	1.18435e-59	2.43745e-58	399.367	1355.31	1317.06
POU4F3	5.16089	1.10706	0.204027	5.42605	5.7615e-08	1.16769e-07	1.17673	0.224044	5.25224	1.50259e-07	3.18276e-07	2.53006	11.6743	13.7206
NRCAM	854.844	1.12267	0.176053	6.37687	1.80746e-10	4.22951e-10	1.09872	0.195326	5.62504	1.85465e-08	4.17328e-08	413.698	885.954	900.769
SLC26A3	272.546	-1.66772	0.271525	-6.14206	8.14562e-10	1.83967e-09	-2.47004	0.30133	-8.19712	2.46218e-16	8.65324e-16	787.337	223.936	247.838
ABCC6	356.005	-1.54773	0.14447	-10.7132	8.83048e-27	4.28327e-26	-1.2547	0.160312	-7.82664	5.01077e-15	1.64908e-14	846.846	354.889	289.648
MAP3K20	5272.74	-1.53098	0.0804685	-19.0258	1.04316e-80	2.63783e-79	-1.51923	0.0892878	-17.015	6.36057e-65	1.57981e-63	12899.3	4500.06	4463.54
TF	1930.63	-1.90705	0.234977	-8.11591	4.82153e-16	1.4761e-15	-3.4247	0.26074	-13.1345	2.08754e-39	2.04491e-38	6520.17	607.178	1738.54
NLRP1	1187.53	-1.02666	0.0935621	-10.973	5.15253e-28	2.63924e-27	-1.07212	0.103823	-10.3264	5.35105e-25	2.82293e-24	2218.11	1055.03	1088.86
ORC6	455.5	2.58642	0.120671	21.4337	6.48548e-102	2.77755e-100	2.37112	0.133734	17.7301	2.45425e-70	7.67325e-69	85.2253	441.151	512.096
CPA1	19.9905	-4.18397	0.221453	-18.8933	1.2961e-79	3.15906e-78	-4.11287	0.246677	-16.6731	2.05567e-62	4.65127e-61	138.706	8.03664	7.64683
ESR1	29178.7	1.67392	0.190515	8.78626	1.54616e-18	5.27661e-18	1.68441	0.211387	7.96835	1.60802e-15	5.42529e-15	9792.46	31473.8	31245.8
CD200	860.113	-1.29232	0.0822473	-15.7126	1.24009e-55	1.6224e-54	-1.23613	0.0912736	-13.5432	8.69629e-42	9.45577e-41	1839.78	781.028	751.22
CCDC80	16181.1	-1.93066	0.124575	-15.498	3.5772e-54	4.46796e-53	-1.7389	0.138224	-12.5803	2.70876e-36	2.33139e-35	47553.9	14247	12473.8
CMA1	59.2571	-2.96671	0.194657	-15.2407	1.89831e-52	2.25311e-51	-2.81884	0.216173	-13.0397	7.27207e-39	6.95645e-38	278.765	39.4939	35.6655
JPH4	55.0063	-1.07887	0.127704	-8.44818	2.95875e-17	9.55272e-17	-1.17946	0.14188	-8.31307	9.326e-17	3.3424e-16	106.852	47.1711	50.7733
SLC7A8	8517.12	1.12074	0.122215	9.17028	4.71806e-20	1.71576e-19	1.19163	0.135602	8.78771	1.52645e-18	5.9336e-18	4076.55	9311.32	8864.83
DAZL	7.00949	2.46278	0.276375	8.91102	5.05659e-19	1.76319e-18	1.15485	0.30498	3.78664	0.0001527	0.000259004	2.48707	8.34082	9.0053
SEMA6A	1459.26	-1.27881	0.127424	-10.0359	1.05986e-23	4.50948e-23	-1.26038	0.14139	-8.91416	4.91531e-19	1.96372e-18	3124.63	1304.32	1287.85
TYRO3	921.5	-2.19022	0.095301	-22.9822	7.02896e-117	4.25916e-115	-2.15445	0.105763	-20.3705	3.05601e-92	1.76959e-90	3140.77	705.494	688.149
WDR76	875.273	1.28411	0.0762946	16.831	1.44721e-63	2.32935e-62	1.30006	0.0846096	15.3653	2.79531e-53	4.52896e-52	378.491	932.035	921.745
CAPN3	47.268	-1.2137	0.115914	-10.4707	1.17713e-25	5.45038e-25	-1.27594	0.128853	-9.90225	4.07025e-23	1.98068e-22	346.475	40.6223	42.5008
TBX15	544.488	-2.29797	0.106684	-21.54	6.56833e-103	2.89539e-101	-2.2787	0.118406	-19.2447	1.5636e-82	6.81574e-81	1952.88	402.38	397.143
COL9A3	724.27	2.235	0.212845	10.5006	8.58266e-26	3.99287e-25	1.19755	0.236143	5.0713	3.95101e-07	8.13564e-07	192.625	681.29	1170.2
EZR	23978.7	1.26186	0.067001	18.8334	4.02003e-79	9.65398e-78	1.33895	0.0743397	18.0113	1.58847e-72	5.28733e-71	10446	26425.4	25050.3
CLSPN	463.835	2.87485	0.121577	23.6463	1.28704e-123	9.12677e-122	2.70039	0.134697	20.0479	2.10558e-89	1.1078e-87	70.3303	457.102	515.868
DPYSL2	6014.18	-1.35545	0.0791988	-17.1145	1.15633e-65	1.95438e-64	-1.46426	0.087879	-16.6622	2.46714e-62	5.5566e-61	13624.1	4937.69	5324.48
CDC45	628.611	2.91455	0.118853	24.5223	8.5538e-133	7.44066e-131	2.83974	0.131714	21.5598	4.28601e-103	3.58486e-101	92.1111	659.451	694.487
ECHDC1	2459.66	-1.14989	0.0851807	-13.4994	1.57598e-41	1.29059e-40	-1.23414	0.0945194	-13.0571	5.79262e-39	5.5739e-38	4966.72	2111.33	2238.22
KRT31	49.7675	2.42661	0.302037	8.03413	9.42422e-16	2.85395e-15	3.03288	0.334425	9.06892	1.202e-19	4.93716e-19	12.8828	73.1158	60.8706
CDC6	1748.58	3.00024	0.137655	21.7954	2.56759e-105	1.19083e-103	2.98309	0.152682	19.5379	5.22577e-85	2.45273e-83	239.198	1891.71	1914.35
FMO2	2167.21	-3.2248	0.170769	-18.884	1.54449e-79	3.74581e-78	-3.27639	0.189487	-17.2908	5.51444e-67	1.49901e-65	11433	1179.95	1222.91
EPB41L4B	2067.6	-1.18781	0.0937216	-12.6739	8.25598e-37	5.83765e-36	-1.18704	0.103996	-11.4143	3.54564e-30	2.37168e-29	4195.57	1842.62	1841.6
NANS	4333.38	1.13644	0.067054	16.9481	1.98738e-64	3.26317e-63	1.30002	0.0743906	17.4756	2.19631e-68	6.31222e-67	2021.73	4978.41	4444.6
TLL2	66.2879	1.59281	0.13661	11.6595	2.05304e-31	1.18952e-30	1.59271	0.15114	10.5379	5.77473e-26	3.18734e-25	23.5208	70.4817	70.5497
TDRD1	235.281	1.34621	0.263151	5.11575	3.12496e-07	6.06282e-07	1.11213	0.291943	3.8094	0.000139302	0.000237039	102.194	244.021	259.888
SORBS1	6731.69	-3.65266	0.114287	-31.9605	3.86607e-224	3.98246e-221	-3.79989	0.126814	-29.9643	2.86482e-197	5.0973e-194	41027.8	2945.72	3262.22
CRTAC1	262.368	-1.04401	0.212385	-4.91563	8.84978e-07	1.67432e-06	-1.73474	0.235709	-7.35969	1.84343e-13	5.57473e-13	538.824	161.854	261.331
BAMBI	5044.79	1.30977	0.154856	8.45802	2.71961e-17	8.79513e-17	1.49485	0.171817	8.7002	3.31293e-18	1.27114e-17	2091.07	5893.46	5183.87
IL11	62.9667	1.64354	0.12519	13.1283	2.26573e-39	1.73902e-38	1.48551	0.13844	10.7303	7.33225e-27	4.21211e-26	22.0243	62.0518	69.1262
NUBP2	3386.28	1.02495	0.0777929	13.1754	1.21626e-39	9.38665e-39	1.15625	0.0863065	13.397	6.2936e-41	6.59479e-40	1713.28	3818.44	3486.13
CRISP3	1117.38	3.62029	0.312187	11.5965	4.29162e-31	2.45817e-30	3.76015	0.346328	10.8572	1.8431e-27	1.09048e-26	273.177	6794.66	3526.22
ACOT7	1818.35	1.36779	0.0856631	15.9671	2.16556e-57	2.95774e-56	1.48759	0.095026	15.6545	3.09343e-55	5.39613e-54	732.518	2054.06	1890.28
CDC7	743.996	1.80313	0.0997345	18.0793	4.64278e-73	9.81301e-72	1.52496	0.110608	13.7871	3.0475e-43	3.49828e-42	238.472	686.381	832.312
PCSK5	726.63	-1.76424	0.103746	-17.0053	7.49946e-65	1.24601e-63	-1.56861	0.115127	-13.625	2.84372e-42	3.14982e-41	1963.62	661.941	578.076
SCD	52938.4	-1.65841	0.149377	-11.1022	1.22422e-28	6.422e-28	-1.27615	0.165743	-7.69956	1.36534e-14	4.38649e-14	131475	54285.3	41649.5
ABLIM1	8405.2	-1.47079	0.0802182	-18.3349	4.36048e-75	9.67611e-74	-1.45776	0.0890088	-16.3777	2.76167e-60	5.8308e-59	19937.9	7258.58	7193.27
ERMP1	6973.15	1.07611	0.0819893	13.125	2.36814e-39	1.81619e-38	1.12983	0.0909678	12.4201	2.03319e-35	1.69913e-34	3423.24	7491.25	7217.43
NRP1	6791.96	-1.24609	0.0800027	-15.5757	1.06554e-54	1.35158e-53	-1.16002	0.0887696	-13.0677	5.0354e-39	4.85961e-38	14064.1	6293.66	5929.19
PALMD	2469.8	-2.92414	0.105994	-27.5877	1.56277e-167	2.6597e-165	-2.82378	0.117616	-24.0085	2.26652e-127	3.52066e-125	11494.5	1623.53	1514.4
KCNK6	3557.99	1.46809	0.106238	13.8189	1.96043e-43	1.71753e-42	1.50438	0.117868	12.7633	2.62763e-37	2.35153e-36	1360.31	3859.51	3763.52
FBXL19	1804.26	1.26684	0.06791	18.6547	1.15563e-77	2.68943e-76	1.24495	0.0753277	16.5271	2.34164e-61	5.12647e-60	797.159	1889.55	1918.28
MAGEB2	5.00291	2.51392	0.483885	5.19529	2.04401e-07	4.00977e-07	2.78729	0.532831	5.23109	1.68511e-07	3.55666e-07	1.66275	39.8531	15.9303
EFNA2	6.84615	3.56214	0.316659	11.2491	2.33866e-29	1.2561e-28	3.7419	0.342032	10.9402	7.40502e-28	4.48148e-27	0.607361	8.21917	7.25913
CBARP	69.8645	1.33902	0.112461	11.9066	1.09408e-32	6.63772e-32	1.38751	0.124379	11.1555	6.73325e-29	4.27868e-28	29.0556	76.1624	73.5401
IGFALS	258.764	2.80476	0.199353	14.0694	5.86043e-45	5.40635e-44	3.02095	0.220958	13.6721	1.49032e-42	1.66964e-41	38.8422	315.459	271.509
MISP	2423.56	3.15601	0.159091	19.8378	1.40606e-87	4.22726e-86	3.43526	0.176479	19.4655	2.15258e-84	9.88972e-83	281.299	3043.25	2507.67
HCN2	103.531	3.6878	0.177072	20.8266	2.48414e-96	9.51461e-95	3.69752	0.19527	18.9354	5.82231e-80	2.35443e-78	8.86697	114.719	113.941
RASSF7	1865.42	1.70013	0.105324	16.1418	1.29625e-58	1.83311e-57	1.7712	0.11684	15.1592	6.58785e-52	1.01286e-50	608.617	2077.81	1977.85
PALM	2286.04	-1.41718	0.113824	-12.4507	1.38651e-35	9.44872e-35	-1.25739	0.126298	-9.95576	2.37996e-23	1.1689e-22	5166.75	2161.28	1934.63
SERPIND1	10.6652	-1.39283	0.210453	-6.61824	3.63509e-11	8.83582e-11	-2.27966	0.235461	-9.68167	3.60787e-22	1.67967e-21	25.5974	5.28404	9.97353
MMP11	17384.2	6.18097	0.143849	42.9685	0	0	6.39728	0.159554	40.0949	0	0	252.427	21276.9	18314.4
P2RX6	29.1899	-2.41178	0.169478	-14.2306	5.91361e-46	5.63766e-45	-2.48299	0.188528	-13.1704	1.29868e-39	1.28308e-38	110.651	19.8513	20.8648
OSM	160.377	1.44045	0.13762	10.4668	1.22673e-25	5.67734e-25	1.27271	0.152566	8.34203	7.30245e-17	2.63114e-16	64.4976	155.764	174.944
GRK3	2267.57	-1.75652	0.0778724	-22.5563	1.16413e-112	6.36435e-111	-1.80831	0.086414	-20.9261	3.09942e-97	2.18208e-95	6310.75	1801.72	1867.68
PLA2G3	82.7619	1.98508	0.28032	7.0815	1.42598e-12	3.71432e-12	1.79101	0.310814	5.76232	8.29661e-09	1.90767e-08	23.4102	81.0673	92.7345
SEZ6L	329.796	2.70465	0.251579	10.7507	5.88074e-27	2.87601e-26	2.18429	0.279042	7.8278	4.96463e-15	1.63445e-14	60.1133	584.049	710.006
GCAT	1004.62	1.08976	0.0962009	11.328	9.54107e-30	5.18572e-29	1.14364	0.106716	10.7168	8.49308e-27	4.86897e-26	494.356	1092.3	1052.18
EIF3L	9831.35	-1.04561	0.0641954	-16.288	1.20133e-59	1.73652e-58	-1.11465	0.0712305	-15.6484	3.40452e-55	5.91769e-54	18651.5	8613.22	9035.43
TTC28	1619.17	-1.44155	0.0758129	-19.0145	1.29246e-80	3.2556e-79	-1.45727	0.0841302	-17.3216	3.23022e-67	8.87946e-66	3796.11	1382.36	1397.8
CENPM	517.003	2.77979	0.109448	25.3982	2.64002e-142	2.63625e-140	2.91671	0.121234	24.0585	6.80307e-128	1.07379e-125	80.2195	605.797	550.836
2018-09-03	1141.32	1.43507	0.159394	9.0033	2.19033e-19	7.7535e-19	1.05186	0.176845	5.9479	2.71608e-09	6.44509e-09	477.244	989.524	1290.58
SLC5A4	25.1519	-1.35831	0.115859	-11.7238	9.62415e-32	5.64809e-31	-1.26684	0.128912	-9.82721	8.59682e-23	4.1199e-22	55.3657	22.9759	21.7916
KDELR3	2443.74	1.10944	0.102041	10.8725	1.558e-27	7.79878e-27	1.04026	0.113211	9.18868	3.97701e-20	1.67034e-19	1207.15	2482.56	2604.48
MIOX	10.7134	2.23007	0.185886	11.9969	3.68658e-33	2.27256e-32	2.27761	0.202667	11.2382	2.64726e-29	1.71393e-28	2.43401	11.9637	11.5195
RHBDD3	1371.43	1.03093	0.0757373	13.6119	3.40286e-42	2.86208e-41	1.09301	0.0840129	13.01	1.07333e-38	1.02225e-37	699.482	1492.16	1429.21
RASL10A	74.2419	-1.88319	0.123054	-15.3038	7.21474e-53	8.65768e-52	-1.78256	0.136692	-13.0407	7.17755e-39	6.87275e-38	216.435	63.0981	58.7849
NEFH	496.019	1.76189	0.190515	9.24802	2.28679e-20	8.43041e-20	1.89275	0.211335	8.95618	3.36135e-19	1.35451e-18	153.346	569.521	520.182
BIK	777.821	1.56118	0.117723	13.2614	3.8738e-40	3.04245e-39	1.77244	0.130572	13.5744	5.6835e-42	6.22482e-41	271.372	927.39	801.058
TTLL12	6292.91	1.30793	0.0941792	13.8877	7.52569e-44	6.70122e-43	1.48441	0.104492	14.206	8.40565e-46	1.0573e-44	2597.78	7268.5	6431.61
CBX7	1974.54	-1.54811	0.0847074	-18.276	1.28572e-74	2.81792e-73	-1.49101	0.0939956	-15.8625	1.15177e-56	2.12264e-55	4864.94	1730.76	1663.61
CABP7	35.5572	2.12021	0.173904	12.1918	3.43542e-34	2.21469e-33	1.82926	0.192081	9.52336	1.67669e-21	7.54048e-21	9.27622	40.8562	48.8297
CACNA1I	144.81	1.4666	0.172339	8.50993	1.74035e-17	5.68132e-17	1.51263	0.191077	7.91635	2.44578e-15	8.17013e-15	55.6023	158.743	153.796
PVALB	724.46	5.18271	0.304959	16.9948	8.97841e-65	1.4892e-63	5.02391	0.338087	14.8598	6.00889e-50	8.69867e-49	28.7724	860.923	922.602
MLC1	70.6861	1.43597	0.214314	6.70032	2.07968e-11	5.11544e-11	1.62479	0.237539	6.84012	7.91272e-12	2.18216e-11	36.0351	274.717	159.487
CTSG	148.925	-1.83593	0.18821	-9.75467	1.7618e-22	7.11406e-22	-1.66842	0.208874	-7.98766	1.37528e-15	4.6569e-15	420.495	132.295	117.789
POLE2	375.954	1.52145	0.0765025	19.8876	5.208e-88	1.58278e-86	1.47839	0.0847601	17.442	3.95763e-68	1.13078e-66	139.937	390.211	402.028
PYGL	4679.32	-1.27793	0.119498	-10.6941	1.08416e-26	5.24059e-26	-1.288	0.132592	-9.71403	2.62745e-22	1.23231e-21	10011.8	4099.97	4128.66
CDKN3	589.292	2.89727	0.103888	27.8885	3.67495e-171	6.91597e-169	2.90573	0.11507	25.2518	1.08262e-140	2.61831e-138	85.9197	643.78	639.976
PLEK2	480.519	1.38829	0.0922063	15.0563	3.13663e-51	3.58587e-50	1.39647	0.102235	13.6593	1.77587e-42	1.98047e-41	194.403	663.874	509.224
LRRC74A	3.45295	-1.21493	0.169238	-7.17878	7.03347e-13	1.85925e-12	-1.77361	0.192449	-9.21602	3.08346e-20	1.30288e-19	7.45974	2.18586	3.31908
SAMD15	214.01	1.15692	0.118669	9.74915	1.86022e-22	7.4914e-22	1.0675	0.131582	8.11281	4.9464e-16	1.71135e-15	102.456	214.817	228.619
SIX4	1390.26	1.53809	0.101907	15.0931	1.79754e-51	2.0695e-50	1.69504	0.113042	14.9948	7.93718e-51	1.17865e-49	495.435	1603.69	1438.42
SLC8A3	15.8343	-1.03263	0.149874	-6.88993	5.58192e-12	1.40985e-11	-1.11506	0.166801	-6.68499	2.30945e-11	6.18763e-11	62.8652	13.7541	14.6499
TCL1A	86.4894	3.01994	0.257756	11.7162	1.05236e-31	6.16669e-31	2.43947	0.285515	8.5441	1.29539e-17	4.8338e-17	32.9624	78.9778	128.285
PCNX1	3756.85	-1.09808	0.0609243	-18.0237	1.26862e-72	2.64424e-71	-1.16202	0.0676045	-17.1885	3.24078e-66	8.47975e-65	7315.29	3268.85	3417.24
DHRS2	9635.67	1.61196	0.29619	5.44231	5.25931e-08	1.0689e-07	2.21391	0.328638	6.73661	1.62126e-11	4.38156e-11	4056.33	13954.1	9193.86
EMC9	785.939	1.17121	0.0813307	14.4005	5.13452e-47	5.10471e-46	1.30272	0.0901964	14.4432	2.76679e-47	3.66385e-46	361.322	891.205	813.416
PSME2	8168.81	1.25736	0.0787775	15.9609	2.39068e-57	3.26065e-56	1.23608	0.0874041	14.1421	2.08985e-45	2.59534e-44	3637.74	8569.21	8696.45
PLTP	4855.65	-1.34483	0.111084	-12.1065	9.75633e-34	6.17365e-33	-1.14732	0.123255	-9.3085	1.29653e-20	5.57952e-20	10475.9	4729.65	4124.43
MMP9	5482.29	2.65103	0.169044	15.6825	1.99404e-55	2.58974e-54	2.06086	0.187556	10.988	4.3666e-28	2.66739e-27	1036.76	17104	8348.44
ABHD12	5189.37	1.09011	0.069393	15.7092	1.30843e-55	1.70951e-54	1.17498	0.0769886	15.2617	1.37581e-52	2.18388e-51	2535.13	5724.1	5396.89
GINS1	1113.23	2.46788	0.0970726	25.4231	1.4019e-142	1.42906e-140	2.49431	0.107627	23.1755	8.05137e-119	9.55039e-117	217.092	1223.64	1201.39
SGK2	152.103	-3.20058	0.144514	-22.1473	1.108e-108	5.54621e-107	-3.23022	0.160488	-20.1276	4.23341e-90	2.28254e-88	792.838	84.5923	86.2934
MYBL2	3347.96	3.85655	0.148707	25.934	2.75781e-148	3.04948e-146	3.73017	0.16495	22.614	3.1579e-113	3.28757e-111	259.15	3438.98	3753.75
RIMS4	1777.55	3.21692	0.234904	13.6946	1.09316e-42	9.33885e-42	3.51869	0.260598	13.5023	1.51491e-41	1.62733e-40	195.67	2242.49	1819.25
SALL4	116.255	2.77923	0.128651	21.6028	1.68875e-103	7.51187e-102	2.7534	0.142012	19.3885	9.65075e-84	4.3223e-82	18.4454	124.274	126.615
HRH3	6.23427	1.96625	0.297072	6.61876	3.62221e-11	8.8056e-11	1.77957	0.32696	5.44277	5.24582e-08	1.14545e-07	1.7928	12.5692	16.0331
NTSR1	26.25	2.88872	0.250299	11.5411	8.18801e-31	4.63569e-30	3.3701	0.275558	12.2301	2.14667e-34	1.7093e-33	6.95855	36.3286	26.0118
MRGBP	1365.17	1.02031	0.0666739	15.303	7.2957e-53	8.74947e-52	1.12496	0.0739526	15.2119	2.94648e-52	4.61349e-51	695.029	1515.93	1409.82
SLC17A9	626.243	1.92168	0.14774	13.0072	1.11373e-38	8.35813e-38	2.12032	0.163861	12.9397	2.6859e-38	2.50923e-37	172.013	747.975	651.797
NKAIN4	19.0852	1.891	0.192828	9.80665	1.05408e-22	4.30162e-22	1.8944	0.212524	8.9138	4.93112e-19	1.96963e-18	5.48401	38.1338	20.3913
ARFGAP1	5617.13	1.06679	0.0701015	15.2178	2.69624e-52	3.18088e-51	1.19401	0.0777753	15.352	3.43353e-53	5.54875e-52	2762.96	6321.41	5787.87
CHRNA4	8.5676	1.93305	0.341262	5.66444	1.47509e-08	3.09702e-08	1.68133	0.377081	4.4588	8.24192e-06	1.5469e-05	2.53925	18.3988	20.3029
EEF1A2	6047.93	3.30491	0.21404	15.4406	8.72537e-54	1.07675e-52	3.94873	0.237475	16.628	4.3691e-62	9.78398e-61	2595.13	9096.88	5822.17
PTK6	1248.71	1.94255	0.120189	16.1625	9.27793e-59	1.31585e-57	2.17997	0.133315	16.352	4.20617e-60	8.77646e-59	334.122	1514.37	1284.58
SPEF1	162.724	2.40436	0.15818	15.2002	3.52786e-52	4.14948e-51	2.5346	0.175175	14.469	1.90178e-47	2.52864e-46	32.5204	188.671	172.335
CDC25B	3775.55	1.13094	0.100589	11.2432	2.50235e-29	1.34254e-28	1.21645	0.111602	10.8998	1.15458e-27	6.91475e-27	1785.86	4149.93	3910.99
ISM1	862.402	-2.22902	0.125442	-17.7693	1.22139e-70	2.40011e-69	-2.11739	0.139201	-15.211	2.98805e-52	4.67484e-51	2965.06	683.332	632.457
SEL1L2	8.45249	-3.77031	0.21325	-17.6802	5.95986e-70	1.15036e-68	-3.67241	0.238469	-15.3999	1.63834e-53	2.67767e-52	52.4197	4.09494	3.8527
TRIB3	2762.35	1.59615	0.0873579	18.2714	1.39752e-74	3.05954e-73	1.85069	0.0969093	19.0971	2.66766e-81	1.12282e-79	932.425	3363.3	2819.26
SLC52A3	1395.82	1.31995	0.106114	12.4389	1.60654e-35	1.09329e-34	1.44643	0.117718	12.2872	1.0607e-34	8.57147e-34	580.067	1580.99	1448.31
ANGPT4	46.4252	-3.6566	0.138664	-26.3703	3.00125e-153	3.67128e-151	-3.17675	0.154119	-20.6123	2.12709e-94	1.35167e-92	268.452	29.73	21.327
HM13	11631.2	1.0107	0.0563243	17.9443	5.31864e-72	1.09345e-70	1.05704	0.0624918	16.9148	3.49869e-64	8.4853e-63	6022.51	12530.9	12134.7
MYLK2	24.3369	2.47792	0.144693	17.1253	9.60961e-66	1.62839e-64	2.61777	0.157954	16.573	1.09283e-61	2.4141e-60	588.258	35.638	25.7868
HAO1	4.14	2.20008	0.491832	4.47323	7.70464e-06	1.36627e-05	1.17288	0.544211	2.15519	0.0311468	0.0424901	1.12217	6.60997	13.547
CCM2L	243.067	-1.75407	0.0869221	-20.1798	1.47352e-90	4.79864e-89	-1.46515	0.0964864	-15.185	4.44346e-52	6.8967e-51	645.102	233.74	191.238
MYL9	16431.3	-1.38976	0.099724	-13.9361	3.82283e-44	3.4337e-43	-1.34599	0.11065	-12.1644	4.81168e-34	3.77301e-33	37218.4	14641.2	14203.6
PAK5	50.2961	-3.30313	0.22877	-14.4386	2.95593e-47	2.96229e-46	-2.93158	0.253987	-11.5422	8.0791e-31	5.5385e-30	260.481	34.1441	26.3975
E2F1	1331.45	2.65189	0.110649	23.9668	6.17582e-127	4.81567e-125	2.60903	0.122704	21.2628	2.51222e-100	1.94344e-98	232.269	1416.82	1459.45
CST9L	18.0304	2.90188	0.378505	7.66667	1.76515e-14	5.04122e-14	2.62564	0.418379	6.27575	3.4795e-10	8.72864e-10	2.76796	27.6507	24.5091
CST4	164.203	7.75233	0.324072	23.9217	1.82312e-126	1.38841e-124	6.90108	0.353142	19.542	4.82879e-85	2.27733e-83	0.949203	210.35	395.013
WFDC2	5645.53	1.07584	0.205086	5.2458	1.55603e-07	3.07436e-07	1.09715	0.227553	4.82149	1.42489e-06	2.82838e-06	2815.98	6024.36	5936
PPP1R16B	862.951	-1.80045	0.129461	-13.9073	5.71598e-44	5.11304e-43	-1.85579	0.14366	-12.9179	3.56649e-38	3.31765e-37	2458.23	679.122	705.714
FAM83D	1091.16	3.5002	0.130719	26.7766	6.04978e-158	8.22267e-156	3.41589	0.144908	23.5729	7.3172e-123	1.00148e-120	106.684	1138.51	1207.03
SYNDIG1	433.918	2.82212	0.149636	18.8599	2.43608e-79	5.87904e-78	2.75596	0.165857	16.6165	5.29348e-62	1.18e-60	67.1804	453.077	474.389
CDH20	25.6461	-3.25194	0.159865	-20.3418	5.48527e-92	1.88347e-90	-3.75515	0.178688	-21.0151	4.77601e-98	3.46208e-96	141.078	10.455	14.8309
MYOM1	584.083	-4.83422	0.123808	-39.0462	0	0	-4.52376	0.137431	-32.9166	1.27294e-237	4.98281e-234	4579.08	199.05	160.503
LAMA1	452.865	-1.16344	0.143597	-8.10207	5.40298e-16	1.65152e-15	-1.14857	0.159347	-7.20803	5.67687e-13	1.66954e-12	906.908	409.074	404.971
RNF125	781.652	-1.42342	0.0843943	-16.8663	7.95993e-64	1.2886e-62	-1.37931	0.0936591	-14.727	4.32781e-49	6.09313e-48	1798.72	691.241	670.495
MXRA5	21601.6	1.06592	0.108737	9.80269	1.09622e-22	4.46797e-22	1.14602	0.12065	9.49877	2.12378e-21	9.49876e-21	10635.2	23535.9	22264.9
VSIG1	63.4393	1.77559	0.159401	11.1391	8.09363e-29	4.27092e-28	1.2639	0.17656	7.15845	8.15915e-13	2.37954e-12	21.4638	60.9886	73.5189
STS	1863	-1.20477	0.100849	-11.9463	6.79135e-33	4.15429e-32	-1.10726	0.111903	-9.89482	4.38377e-23	2.12848e-22	3776.09	1752.72	1638.13
GPR143	319.94	1.67213	0.131427	12.7229	4.41266e-37	3.14855e-36	1.80482	0.145715	12.386	3.11318e-35	2.57746e-34	104.537	365.469	333.358
MID1	971.37	-1.35329	0.140349	-9.64228	5.29974e-22	2.101e-21	-1.5962	0.15574	-10.2491	1.19432e-24	6.2036e-24	2232.02	738.282	873.656
RHOXF1	11.4372	-2.6113	0.151258	-17.2639	8.79493e-67	1.52062e-65	-2.49283	0.168951	-14.7547	2.86848e-49	4.05943e-48	46.5977	8.31596	7.6321
CHRDL1	2885.95	-4.47436	0.189141	-23.6562	1.01902e-123	7.2789e-122	-4.38706	0.209872	-20.9035	4.97702e-97	3.45426e-95	21364.5	1021.05	961.125
SRPX	1404.74	-2.59435	0.115738	-22.4158	2.76314e-111	1.46957e-109	-2.30901	0.128427	-17.9792	2.83679e-72	9.33137e-71	5565.58	1123.22	921.616
SYP	433.758	1.57656	0.182396	8.64361	5.4464e-18	1.81658e-17	1.52442	0.202332	7.53424	4.9118e-14	1.5303e-13	157.761	493.176	495.207
BMX	112.861	-2.82702	0.1351	-20.9254	3.14521e-97	1.23363e-95	-2.42153	0.149986	-16.145	1.23078e-58	2.44805e-57	487.329	90.9976	68.6575
ZC3H12B	104.4	-1.35933	0.0923981	-14.7116	5.42792e-49	5.79887e-48	-1.45916	0.102681	-14.2106	7.87692e-46	9.92705e-45	236.193	85.8792	92.316
SLC35A2	3217.38	1.29544	0.0547371	23.6666	7.95826e-124	5.72643e-122	1.36037	0.0607165	22.4052	3.5002e-111	3.53124e-109	1371.02	3520.29	3365.36
PCSK1N	274.447	2.9624	0.257934	11.4851	1.5675e-30	8.78305e-30	2.87006	0.286018	10.0346	1.07447e-23	5.34828e-23	38.8788	284.26	303.043
SMS	6993.55	1.07118	0.065831	16.2716	1.56881e-59	2.26269e-58	1.17504	0.073038	16.0881	3.09039e-58	6.04248e-57	3434.55	7755.35	7216.58
TIMP1	19020.1	1.10522	0.095395	11.5858	4.86664e-31	2.77777e-30	1.2509	0.105845	11.8182	3.14325e-32	2.28189e-31	9089.19	21631.7	19553.9
KLHL4	61.9146	-2.08333	0.119805	-17.3893	9.93675e-68	1.78588e-66	-2.04438	0.133167	-15.352	3.43607e-53	5.54875e-52	200.07	48.4665	47.2105
GABRE	842.145	-2.32444	0.196761	-11.8135	3.32343e-32	1.9801e-31	-2.55272	0.218335	-11.6918	1.40384e-31	9.91553e-31	3147.2	536.435	628.387
ITIH6	431.425	1.35613	0.173298	7.8254	5.0605e-15	1.48939e-14	1.41484	0.192241	7.35974	1.84266e-13	5.57326e-13	177.095	472.278	453.479
MAGED2	44565.1	1.21128	0.102157	11.8571	1.97763e-32	1.18731e-31	1.37271	0.113348	12.1105	9.29021e-34	7.20682e-33	19809.1	51296.9	45866.6
KLF8	819.998	-1.13873	0.0991306	-11.4872	1.53032e-30	8.58209e-30	-1.202	0.110007	-10.9266	8.59932e-28	5.18024e-27	1629.75	708.389	740.245
ZDHHC15	191.801	-1.14425	0.118557	-9.65146	4.84621e-22	1.92511e-21	-1.22088	0.131604	-9.27694	1.7441e-20	7.46132e-20	385.465	165.339	174.419
CENPI	358.566	2.18318	0.102962	21.2038	8.80078e-100	3.63394e-98	2.14687	0.114061	18.8221	4.97565e-79	1.96734e-77	85.474	378.43	388.111
DRP2	66.1646	2.09952	0.120198	17.4671	2.55106e-68	4.68381e-67	2.06777	0.132591	15.5951	7.85941e-55	1.34815e-53	22.5811	70.1179	71.7483
HTR2A	46.1065	-2.50754	0.17911	-14	1.55914e-44	1.41999e-43	-2.83583	0.199142	-14.2402	5.15657e-46	6.54503e-45	188.387	26.3856	33.2107
CAB39L	2318.71	-1.24778	0.0881189	-14.1602	1.61606e-45	1.5141e-44	-1.04952	0.0977766	-10.7339	7.05727e-27	4.05891e-26	4749.2	2294.45	1999.88
SGCG	142.191	-2.74584	0.251557	-10.9154	9.73243e-28	4.91189e-27	-2.4727	0.279163	-8.85758	8.17728e-19	3.22478e-18	605.236	109.029	90.1827
RGCC	1394.12	-1.51369	0.0877909	-17.2419	1.28635e-66	2.21624e-65	-1.64211	0.0974235	-16.8553	9.58619e-64	2.29085e-62	3452.81	1106.3	1209.3
MEDAG	704.15	-2.37974	0.133783	-17.788	8.75055e-71	1.72821e-69	-2.42847	0.148465	-16.3572	3.86215e-60	8.10181e-59	2644.53	491.261	508.136
MSLN	1005.18	4.26754	0.283776	15.0384	4.11522e-51	4.68819e-50	2.74309	0.314786	8.71416	2.92912e-18	1.1263e-17	119.455	1127.94	1964.29
CORO1A	3029.87	1.10483	0.118378	9.33305	1.02868e-20	3.84739e-20	1.00004	0.131342	7.614	2.65733e-14	8.39808e-14	1512.65	3025.46	3253.4
NFAT5	2791.91	-1.1112	0.0947966	-11.7219	9.84532e-32	5.77443e-31	-1.25424	0.105188	-11.9238	8.8965e-33	6.62062e-32	5539.04	2321.92	2564.18
CBLN1	67.9697	-1.02287	0.206269	-4.95889	7.08988e-07	1.35049e-06	-1.30178	0.228991	-5.68487	1.30912e-08	2.9755e-08	131.652	53.393	64.7782
ZNF423	688.523	-1.23957	0.113409	-10.9301	8.27878e-28	4.1999e-27	-1.18454	0.125848	-9.41246	4.8468e-21	2.13124e-20	1429.33	628.775	605.297
CCL17	59.041	1.78902	0.177175	10.0974	5.66986e-24	2.44267e-23	1.91601	0.196096	9.77079	1.50277e-22	7.11127e-22	17.9464	67.8464	62.1129
NME3	3261.05	1.44865	0.10855	13.3455	1.25813e-40	1.00384e-39	1.7032	0.120431	14.1426	2.07536e-45	2.57898e-44	1217.54	3964.65	3323.25
HAS3	627.001	-2.94168	0.159198	-18.4782	3.09549e-76	7.02841e-75	-2.81551	0.176662	-15.9373	3.49363e-57	6.57474e-56	2919.92	414.994	380.066
HAGHL	731.809	3.37855	0.132928	25.4164	1.66171e-142	1.68513e-140	3.71126	0.147293	25.1965	4.37207e-140	1.00671e-137	72.421	948.808	753.311
FAM173A	840.038	1.7115	0.111762	15.3138	6.1826e-53	7.45569e-52	1.99855	0.12395	16.1238	1.73622e-58	3.44289e-57	261.368	1044.35	855.754
SLC7A5	7460.68	2.6387	0.151551	17.4113	6.77236e-68	1.22503e-66	2.44633	0.168147	14.5488	5.94691e-48	8.02709e-47	1345.27	7332.25	8378.09
METRN	3251.69	2.29785	0.135638	16.9411	2.23862e-64	3.67261e-63	2.63048	0.150479	17.4808	2.00734e-68	5.78611e-67	674.578	4177.2	3316.97
RHBDL1	261.192	2.5811	0.146224	17.6517	9.87032e-70	1.89023e-68	2.70271	0.161986	16.6849	1.68834e-62	3.83789e-61	46.5665	303.223	278.659
CRYM	188.569	1.25112	0.22593	5.53764	3.06582e-08	6.31823e-08	1.22816	0.25062	4.90049	9.55997e-07	1.92162e-06	84.5816	274.971	201.369
PRSS33	36.3276	3.34287	0.408996	8.17336	2.99907e-16	9.29058e-16	2.05014	0.453095	4.52475	6.04679e-06	1.147e-05	7.84927	173.353	92.6137
ELOB	8680.82	1.09751	0.083066	13.2125	7.42777e-40	5.76433e-39	1.23533	0.092163	13.4037	5.75115e-41	6.03547e-40	4184.36	9851.47	8953.76
TOX3	1587.8	1.47631	0.173487	8.50962	1.74511e-17	5.69539e-17	1.5422	0.192481	8.01223	1.12644e-15	3.82756e-15	601.027	1750.49	1672.35
QPRT	1563.3	1.41478	0.141116	10.0256	1.17613e-23	4.99224e-23	1.66155	0.156559	10.613	2.59402e-26	1.45765e-25	596.037	1885.79	1589.31
PYCARD	2354.51	1.89824	0.123844	15.3277	4.99078e-53	6.02588e-52	1.82546	0.137395	13.2863	2.78126e-40	2.82925e-39	688.143	2438.98	2565.1
MAZ	4314.78	1.26458	0.0561839	22.5079	3.47638e-112	1.87955e-110	1.2711	0.0623277	20.3939	1.89571e-92	1.10755e-90	1899.59	4584.11	4563.39
IL21R	292.282	2.66585	0.136956	19.4651	2.1713e-84	6.08836e-83	2.43685	0.151729	16.0605	4.82345e-58	9.35624e-57	51.6853	280.068	328.276
SYT17	1320.49	1.34445	0.143848	9.34634	9.07298e-21	3.39989e-20	1.44006	0.15959	9.02348	1.82212e-19	7.4297e-19	542.428	1471.77	1377.41
TMC5	3355.31	1.14994	0.187382	6.1369	8.41485e-10	1.89851e-09	1.14098	0.207907	5.48791	4.06711e-08	8.94601e-08	1574.1	3471.43	3493.08
SLC6A2	47.3626	-1.1231	0.287704	-3.90368	9.4742e-05	0.000156401	-1.79323	0.319453	-5.61344	1.98344e-08	4.4503e-08	99.5633	38.4381	45.7092
KNOP1	1961.82	1.052	0.0534175	19.6939	2.43421e-86	7.12144e-85	1.04043	0.0592493	17.5602	4.9716e-69	1.47431e-67	996.964	2050.77	2067.32
CORO2B	293.57	-2.44274	0.104686	-23.3341	2.00066e-120	1.31841e-118	-2.16878	0.1162	-18.6642	9.67797e-78	3.68516e-76	1091.05	242.643	200.726
RASL12	621.546	-1.07891	0.105254	-10.2505	1.1775e-24	5.23892e-24	-1.12705	0.116804	-9.64911	4.95843e-22	2.29045e-21	1200.34	549.677	568.194
CEMIP	1249.57	3.13501	0.150401	20.8444	1.71308e-96	6.5871e-95	3.16415	0.166799	18.9698	3.03014e-80	1.23554e-78	152.554	1367.64	1340.32
ZNF106	5950.69	-1.69158	0.0705486	-23.9775	4.77991e-127	3.7421e-125	-1.65631	0.0782813	-21.1585	2.3064e-99	1.72954e-97	15782.4	5006.53	4885.8
ATP8B4	300.62	-1.37554	0.101278	-13.5817	5.14006e-42	4.30287e-41	-1.56194	0.112434	-13.8921	7.07526e-44	8.33697e-43	694.245	235.023	267.555
FAM189A1	97.7485	1.68375	0.200559	8.3953	4.64705e-17	1.4898e-16	1.52376	0.222336	6.85344	7.20954e-12	1.99329e-11	33.3017	95.5836	106.824
OIP5	184.202	2.42217	0.0975659	24.826	4.69598e-136	4.31501e-134	2.40621	0.107798	22.3216	2.28076e-110	2.22085e-108	37.3464	197.676	199.853
PDGFRL	1673.73	-1.23546	0.109655	-11.2668	1.91418e-29	1.03065e-28	-1.1021	0.121673	-9.05785	1.33047e-19	5.4534e-19	3423.32	1594.7	1453.94
ZDHHC2	1130.19	-1.08073	0.110369	-9.79203	1.21822e-22	4.95697e-22	-1.1698	0.122471	-9.55168	1.2761e-21	5.76675e-21	2188.06	972.53	1034.43
RP1	47.1904	1.46619	0.228566	6.4147	1.41099e-10	3.32401e-10	1.56797	0.253261	6.19114	5.97292e-10	1.47678e-09	17.9131	53.1274	49.5827
TRPA1	329.554	4.90396	0.258751	18.9524	4.21702e-80	1.04343e-78	4.64331	0.28651	16.2065	4.5398e-59	9.15066e-58	12.752	641.207	1125.49
SFRP1	15363.3	-2.50904	0.224251	-11.1885	4.64134e-29	2.46983e-28	-2.69746	0.248821	-10.841	2.20146e-27	1.29741e-26	61889	9541.08	10872.2
LAPTM4B	13181	1.26299	0.121849	10.3652	3.57096e-25	1.62575e-24	1.36993	0.135197	10.1328	3.95031e-24	2.00767e-23	5722.77	14790.9	13734.2
JPH1	589.236	1.49772	0.141017	10.6209	2.38327e-26	1.13658e-25	1.79369	0.156413	11.4677	1.91786e-30	1.2957e-29	603.575	727.783	592.844
DKK4	10.7087	-1.12087	0.255939	-4.37943	1.18989e-05	2.08399e-05	-1.86881	0.285212	-6.55235	5.66398e-11	1.48859e-10	22.6375	6.20203	10.4618
ESRP1	9413.49	1.59727	0.0847092	18.856	2.625e-79	6.32716e-78	1.63685	0.0939847	17.4162	6.21927e-68	1.76411e-66	3299.55	10261.7	9983.98
WISP1	1143.85	3.50119	0.123732	28.2967	3.7983e-176	8.74591e-174	3.50491	0.13715	25.5552	4.80576e-144	1.25411e-141	109.942	1247.92	1244.91
TRPS1	29533.9	1.18804	0.105058	11.3084	1.19301e-29	6.46623e-29	1.22233	0.116567	10.4861	1.00106e-25	5.47129e-25	13597.5	31726.3	30981
SPAG1	1107.74	1.32174	0.0861576	15.3409	4.07288e-53	4.92368e-52	1.34972	0.0955648	14.1236	2.7164e-45	3.35852e-44	468.025	1192.97	1170.07
NCALD	2507	-1.3738	0.143851	-9.55017	1.29482e-21	5.04525e-21	-1.70031	0.159617	-10.6524	1.69851e-26	9.61344e-26	5922.32	1822.41	2285.34
TSTA3	6825.02	1.74784	0.0832933	20.9842	9.15167e-98	3.65544e-96	1.93813	0.0924098	20.9732	1.15144e-97	8.19493e-96	2108.38	8079.52	7081.06
PYCR3	1944.57	1.72512	0.0904154	19.08	3.70423e-81	9.46464e-80	2.04658	0.10029	20.4065	1.46329e-92	8.62634e-91	594.247	2455.14	1964.63
SQLE	6051.62	2.2633	0.10997	20.5812	4.04543e-94	1.45814e-92	2.41056	0.122006	19.7577	6.8887e-87	3.42197e-85	1327.7	7059.6	6374.56
ARHGEF10	1816.97	-1.00695	0.0685643	-14.6863	7.89346e-49	8.40081e-48	-1.082	0.0760856	-14.2209	6.80063e-46	8.60944e-45	3362.64	1588.31	1673.27
MCM4	8436.54	1.7892	0.0928575	19.2682	9.92959e-83	2.65132e-81	1.7815	0.103025	17.292	5.40717e-67	1.47189e-65	2618.1	9000.69	9048.83
TULP2	8.42791	-1.21611	0.131213	-9.26822	1.89276e-20	7.00153e-20	-1.25791	0.146717	-8.57369	1.00219e-17	3.76483e-17	17.447	7.32416	7.56002
DHDH	57.856	1.45463	0.145597	9.99077	1.67271e-23	7.05416e-23	1.47069	0.161134	9.12711	7.03512e-20	2.9209e-19	22.2384	61.7697	61.0198
TUBB4A	96.3924	2.31573	0.229313	10.0985	5.60755e-24	2.41689e-23	1.60138	0.254212	6.29938	2.98833e-10	7.52348e-10	23.3878	84.9603	127.657
PPP1R37	3772.77	1.1438	0.0733303	15.5979	7.5237e-55	9.62444e-54	1.27962	0.0813542	15.729	9.57203e-56	1.69695e-54	1761.73	4277.17	3892.79
SLC17A7	79.8567	-3.04163	0.12637	-24.0692	5.25255e-128	4.17898e-126	-2.88264	0.140436	-20.5264	1.25053e-93	7.64858e-92	385.509	52.2494	46.8995
RNASEH2A	1926.76	1.79565	0.0770922	23.2923	5.30602e-120	3.42737e-118	1.7828	0.0855063	20.8499	1.52749e-96	1.03806e-94	596.98	2054.26	2072.43
AMH	129.875	2.70309	0.188426	14.3456	1.13462e-46	1.11592e-45	2.75118	0.208638	13.1863	1.05161e-39	1.04425e-38	21.5381	145.204	140.416
RETN	9.90827	1.3882	0.218865	6.34271	2.25751e-10	5.25562e-10	1.21244	0.241605	5.01828	5.21363e-07	1.06559e-06	4.14542	9.6665	10.8776
CLEC4M	3.24259	-2.25305	0.235934	-9.54948	1.30346e-21	5.07686e-21	-2.19902	0.264147	-8.32499	8.43365e-17	3.03035e-16	11.3938	2.48543	4.05888
IL4I1	647.55	2.69689	0.137599	19.5997	1.55543e-85	4.45072e-84	2.61889	0.152561	17.1662	4.75335e-66	1.23222e-64	109.679	673.774	711.134
TLE6	285.904	1.5878	0.128495	12.3569	4.46946e-35	2.99474e-34	1.60635	0.142464	11.2755	1.73442e-29	1.13003e-28	101.341	308.729	304.705
NOVA2	307.533	-1.5234	0.0829401	-18.3675	2.39133e-75	5.36732e-74	-1.38999	0.0920691	-15.0972	1.68881e-51	2.55831e-50	739.762	282.372	257.327
ASF1B	1550.69	3.08045	0.0980708	31.4105	1.45632e-216	1.09627e-213	2.95804	0.108727	27.2061	5.50162e-163	3.0765e-160	204.235	1587.16	1727.59
TNNT1	1798.76	4.44002	0.213784	20.7687	8.30688e-96	3.14472e-94	4.91588	0.237095	20.7338	1.71603e-95	1.13467e-93	5195.22	2516.79	1809.65
CASP14	995.995	6.27518	0.350874	17.8844	1.55976e-71	3.1602e-70	6.40518	0.388905	16.4698	6.04931e-61	1.30537e-59	24.0454	3018.21	2407.82
SLC1A6	40.0808	3.19483	0.329225	9.70409	2.89641e-22	1.15928e-21	2.07261	0.364546	5.68547	1.3045e-08	2.96536e-08	5.58669	76.8043	104.577
CCNE1	511.031	2.9111	0.159041	18.3041	7.67927e-75	1.68875e-73	2.32687	0.176344	13.195	9.37163e-40	9.32493e-39	80.0982	401.856	602.368
CNTD2	465.463	2.94428	0.170877	17.2304	1.57126e-66	2.69997e-65	3.20296	0.189425	16.9089	3.86988e-64	9.36234e-63	62.6304	576.805	482.101
PRX	488.592	-1.22699	0.0974998	-12.5846	2.56718e-36	1.78807e-35	-1.12245	0.108201	-10.3737	3.26571e-25	1.73923e-24	997.633	458.247	426.228
SHD	5.49155	1.74599	0.235452	7.41551	1.2116e-13	3.32541e-13	1.36268	0.258649	5.26846	1.37574e-07	2.92484e-07	1.92218	5.77799	6.24604
FSD1	45.7215	3.13463	0.219128	14.305	2.03643e-46	1.98096e-45	1.58816	0.242432	6.55093	5.71812e-11	1.50222e-10	6.87352	24.1197	60.2979
TJP3	3382.4	1.68787	0.10285	16.411	1.59653e-60	2.37081e-59	1.80149	0.114105	15.7881	3.75737e-56	6.79033e-55	1102.18	3842.39	3551.33
APLP1	823.153	2.51395	0.178086	14.1165	3.00626e-45	2.79385e-44	2.56535	0.197535	12.9868	1.45385e-38	1.3733e-37	155.676	921.418	967.642
BBC3	736.729	1.35495	0.0979634	13.8312	1.65286e-43	1.45197e-42	1.37437	0.108653	12.6492	1.13052e-36	9.84281e-36	305.389	791.817	781.152
CEACAM5	2937.86	4.17887	0.288318	14.494	1.32232e-47	1.34864e-46	4.52434	0.319863	14.1446	2.01556e-45	2.50944e-44	160.497	3692.53	2906.24
ATP1A3	240.603	3.57304	0.197843	18.06	6.58118e-73	1.38205e-71	3.4315	0.219111	15.661	2.79274e-55	4.88905e-54	28.4483	246.278	271.671
MEIS3	1469.03	1.02976	0.106723	9.64893	4.9671e-22	1.97273e-21	1.06923	0.118401	9.03059	1.70748e-19	6.97242e-19	752.939	1580.06	1537.43
CNFN	279.923	1.25494	0.130315	9.63005	5.96997e-22	2.35954e-21	1.26819	0.144516	8.77543	1.70259e-18	6.60518e-18	124.12	299.113	296.292
GRIN2D	265.342	2.18242	0.13778	15.8399	1.6519e-56	2.19939e-55	2.18746	0.152687	14.3264	1.49682e-46	1.93627e-45	62.4022	284.236	283.163
SYNGR4	16.9062	2.90434	0.179115	16.215	3.95139e-59	5.64913e-58	3.38341	0.193999	17.4404	4.07204e-68	1.16178e-66	2.21281	23.3096	19.1405
CLEC11A	995.643	1.39567	0.120212	11.61	3.66432e-31	2.10379e-30	1.54491	0.133352	11.5852	4.9003e-31	3.3902e-30	392.468	1145.24	1032.75
CCDC114	117.352	1.30667	0.13536	9.6533	4.75984e-22	1.89156e-21	1.37652	0.149993	9.17722	4.42378e-20	1.85401e-19	49.7156	129.304	123.119
LIG1	2617.41	1.06089	0.0636975	16.6551	2.77851e-62	4.31254e-61	1.06949	0.0706627	15.1352	9.48894e-52	1.45319e-50	1320.22	2771.24	2754.62
HAS1	84.3436	-2.16388	0.208305	-10.388	2.81177e-25	1.28459e-24	-2.69993	0.231341	-11.6708	1.79819e-31	1.26416e-30	301.644	46.451	67.3628
CAPS	2799.6	2.13964	0.135765	15.7599	5.87221e-56	7.73424e-55	2.27583	0.150621	15.1096	1.39926e-51	2.13124e-50	670.985	3249.5	2956.8
FAM83E	740.008	1.83651	0.193954	9.46881	2.8306e-21	1.08458e-20	2.05687	0.215164	9.55958	1.18239e-21	5.35687e-21	213.805	889.78	763.707
RASIP1	842.479	-1.44647	0.0980068	-14.7589	2.69718e-49	2.90211e-48	-1.25247	0.108755	-11.5164	1.09068e-30	7.44048e-30	1927.5	809.173	707.266
LILRB5	311.206	-2.82115	0.140202	-20.122	4.73672e-90	1.51482e-88	-2.76247	0.155616	-17.7518	1.66993e-70	5.25465e-69	1393.72	205.404	197.196
KLF1	7.89465	1.71145	0.140116	12.2145	2.60178e-34	1.6884e-33	1.60152	0.151812	10.5494	5.11448e-26	2.8317e-25	2.62208	8.00913	8.58975
MAST1	119.063	2.1198	0.170135	12.4595	1.24183e-35	8.47455e-35	1.86915	0.188501	9.91589	3.55064e-23	1.73213e-22	30.8632	112.783	134.16
TFPT	1157.8	1.16075	0.0954373	12.1624	4.92787e-34	3.15603e-33	1.33955	0.105867	12.6532	1.07365e-36	9.36011e-36	531.072	1344.1	1187.35
SLC5A5	29.5811	1.91016	0.210799	9.06152	1.28646e-19	4.59379e-19	1.1907	0.233427	5.10095	3.37949e-07	6.99487e-07	9.42778	49.4275	53.4806
PIK3R2	94.603	1.28695	0.0903595	14.2426	4.98446e-46	4.77279e-45	1.33731	0.099908	13.3854	7.36137e-41	7.68819e-40	40.7219	103.314	99.5881
RAB3A	401.309	1.3918	0.0950487	14.643	1.49309e-48	1.57451e-47	1.42332	0.105376	13.5071	1.42026e-41	1.52733e-40	162.175	434.796	425.376
COMP	7698.42	4.49017	0.164661	27.2691	9.85586e-164	1.54319e-161	4.47865	0.18267	24.5177	9.56777e-133	1.73389e-130	376.688	8397.2	8464.58
UPK1A	76.1124	2.11922	0.24587	8.61925	6.7395e-18	2.24024e-17	2.17686	0.272458	7.98972	1.35251e-15	4.5814e-15	18.8475	151.171	110.869
COPE	7245.66	1.04615	0.0711456	14.7044	6.04013e-49	6.44939e-48	1.14599	0.0789356	14.5181	9.31201e-48	1.24832e-46	3634.54	8043.32	7505.31
MAG	67.8347	1.28999	0.216711	5.95259	2.6394e-09	5.78286e-09	1.67394	0.240187	6.96931	3.18499e-12	9.00949e-12	27.3063	87.163	75.9221
LSR	8845.79	1.62214	0.0840097	19.3089	4.51669e-83	1.21764e-81	1.4375	0.093209	15.4223	1.15837e-53	1.90358e-52	3158.04	8553.89	9721.62
HPN	2592.16	2.2374	0.149383	14.9776	1.02898e-50	1.15477e-49	2.15063	0.165732	12.9765	1.66302e-38	1.56634e-37	604.944	2686.3	2852.78
SIPA1L3	5556.58	1.0672	0.0673784	15.8389	1.67704e-56	2.23134e-55	1.03265	0.0747546	13.8139	2.10266e-43	2.44378e-42	2802.86	5734.25	5873.27
RUNDC3B	131.205	-1.75109	0.107	-16.3653	3.38306e-60	4.95238e-59	-1.48877	0.118789	-12.5329	4.9344e-36	4.2173e-35	348.89	124.31	103.632
RASA4	56.6187	-1.26849	0.0954547	-13.2889	2.68543e-40	2.12103e-39	-1.19034	0.106099	-11.2191	3.28435e-29	2.1194e-28	119.043	52.189	49.4424
DNAH11	144.138	1.65727	0.212009	7.81696	5.41161e-15	1.59033e-14	1.97428	0.235068	8.39879	4.51108e-17	1.64171e-16	45.8273	180.212	160.878
DLX5	141.593	2.58372	0.190738	13.5459	8.38206e-42	6.95143e-41	1.86789	0.211388	8.8363	9.89398e-19	3.88611e-18	28.5008	151.348	170.697
PTN	2666.51	-2.32347	0.194974	-11.9169	9.66816e-33	5.87838e-32	-2.44287	0.216339	-11.2918	1.44022e-29	9.41168e-29	9864.5	1814.28	1970.8
ADAP1	309.691	1.29256	0.120517	10.7251	7.75876e-27	3.77278e-26	1.4723	0.13363	11.0177	3.13874e-28	1.93241e-27	130.075	360.965	318.613
CAV2	2774.76	-2.92576	0.101421	-28.8477	5.42214e-183	1.49468e-180	-2.94517	0.112543	-26.1694	5.92354e-151	1.96501e-148	13045.6	1693.93	1716.86
CAV1	8767.47	-3.44729	0.104533	-32.9779	1.68446e-238	2.74736e-235	-3.2655	0.115989	-28.1536	2.16505e-174	2.01783e-171	48806.2	5075.37	4474.43
MET	1935.19	-1.6479	0.138428	-11.9044	1.12316e-32	6.80995e-32	-1.80649	0.153602	-11.7608	6.21137e-32	4.44169e-31	5138.93	1469.16	2065.65
HOXA2	46.4904	-2.14477	0.154236	-13.9058	5.84265e-44	5.22395e-43	-2.06199	0.171367	-12.0326	2.39606e-33	1.82473e-32	154.388	37.0416	34.9821
HOXA3	215.631	-1.81499	0.135768	-13.3684	9.25636e-41	7.41267e-40	-1.78768	0.150696	-11.8628	1.84594e-32	1.35212e-31	612.325	177.415	174.068
HOXA5	270.029	-2.43071	0.141371	-17.1939	2.95211e-66	5.04618e-65	-2.20275	0.156899	-14.0393	8.95638e-45	1.08407e-43	1003.23	218.038	186.108
HOXA6	40.289	-2.35764	0.16917	-13.9365	3.80163e-44	3.41623e-43	-2.36022	0.188013	-12.5535	3.80273e-36	3.26434e-35	148.722	28.9552	29.031
CPED1	1121.62	-2.98538	0.12887	-23.1658	1.0081e-118	6.30371e-117	-2.80716	0.143004	-19.63	8.57812e-86	4.13524e-84	5289.11	755.573	667.839
EVX1	10.8012	1.41322	0.271931	5.19699	2.02545e-07	3.97493e-07	1.21474	0.3008	4.03838	5.38226e-05	9.48853e-05	4.43303	10.3781	13.5223
ABHD11	3396.5	1.30397	0.0866954	15.0409	3.96299e-51	4.52003e-50	1.50064	0.096182	15.6021	7.04461e-55	1.20945e-53	1409.12	3987.69	3479.5
STX1A	476.574	1.51523	0.095002	15.9495	2.87403e-57	3.90358e-56	1.46507	0.105333	13.9089	5.58955e-44	6.59823e-43	179.534	495.708	513.215
CRHR2	17.5463	-1.74696	0.129387	-13.5018	1.52593e-41	1.25065e-40	-1.49072	0.143977	-10.3539	4.01957e-25	2.132e-24	46.5013	16.5442	13.8945
CCL24	14.1105	-2.20245	0.264505	-8.32669	8.3134e-17	2.63711e-16	-2.21463	0.294019	-7.53228	4.98636e-14	1.55329e-13	48.6249	10.5172	10.5589
HSPB1	32721.3	1.42041	0.124973	11.3657	6.19323e-30	3.39345e-29	1.82305	0.138664	13.1473	1.76387e-39	1.73479e-38	12108.1	42841.8	32408.6
NPTX2	209.551	2.0256	0.178356	11.3571	6.83965e-30	3.74031e-29	1.68839	0.197767	8.53723	1.37481e-17	5.12433e-17	58.317	187.795	264.348
NUDT1	924.363	1.10885	0.088973	12.4628	1.19113e-35	8.13711e-35	1.09305	0.0986929	11.0753	1.65304e-28	1.03036e-27	454.375	969.43	979.955
PTPRZ1	419.233	-1.32961	0.266597	-4.98734	6.12152e-07	1.16865e-06	-1.84681	0.29583	-6.2428	4.29795e-10	1.07172e-09	984.722	273.793	391.792
TFR2	209.137	3.2607	0.153185	21.286	1.52897e-100	6.36703e-99	3.02305	0.169502	17.835	3.78349e-71	1.21196e-69	24.7277	201.049	237.035
AP1S1	3211.27	1.21095	0.0633113	19.1269	1.50777e-81	3.86763e-80	1.28545	0.0702337	18.3025	7.89779e-75	2.81558e-73	1447.26	3528.12	3350.34
EZH2	1516.57	2.33014	0.0920743	25.3071	2.66548e-141	2.62154e-139	2.15626	0.102111	21.1168	5.57938e-99	4.12074e-97	334.955	1493.45	1684.68
MEST	3579.83	-1.61353	0.121352	-13.2963	2.43339e-40	1.92663e-39	-1.69498	0.134652	-12.5879	2.46123e-36	2.12021e-35	9279.19	2865.93	3032.42
MEOX2	420.906	-2.74115	0.150742	-18.1844	6.86094e-74	1.47725e-72	-2.68686	0.167293	-16.0608	4.80033e-58	9.32064e-57	1827.53	283.805	273.542
TSPAN13	18034.8	1.56469	0.102352	15.2873	9.29154e-53	1.11226e-51	1.6639	0.113563	14.6517	1.31292e-48	1.81472e-47	6407.07	20302.3	18953
RARRES2	3148.56	-1.51034	0.125077	-12.0753	1.42585e-33	8.94162e-33	-1.26666	0.138782	-9.12695	7.04558e-20	2.92463e-19	7370.23	3063.38	2587.23
AGR2	33934.1	2.4278	0.203761	11.9149	9.89261e-33	6.01112e-32	2.36181	0.226083	10.4466	1.51793e-25	8.22278e-25	6933.1	35637.4	37305.2
AEBP1	42903.5	1.09386	0.111033	9.8516	6.74621e-23	2.77524e-22	1.27502	0.123198	10.3494	4.20971e-25	2.22984e-24	20453.2	49497.3	43656
SLC1A1	2738.39	2.31608	0.203722	11.3688	5.97726e-30	3.27694e-29	1.9129	0.22603	8.46301	2.60563e-17	9.59681e-17	625.429	2355.15	3114.51
LHX2	49.951	4.54441	0.231504	19.63	8.57238e-86	2.47461e-84	3.97266	0.25373	15.657	2.97451e-55	5.19795e-54	2.57018	40.4344	60.097
CNTNAP3	115.769	-2.22063	0.175614	-12.645	1.19261e-36	8.39633e-36	-2.69185	0.19503	-13.8022	2.47087e-43	2.8531e-42	421.559	65.2762	90.4667
PRUNE2	692.737	-1.35012	0.141085	-9.56951	1.0741e-21	4.20446e-21	-1.67661	0.156565	-10.7087	9.26325e-27	5.30428e-26	1608.87	503.209	631.099
CORO2A	3177.54	1.34413	0.0923262	14.5585	5.15561e-48	5.33328e-47	1.51465	0.102429	14.7872	1.77085e-49	2.52066e-48	1284.89	3671.64	3262.32
OGN	2065.81	-2.35605	0.193385	-12.1832	3.82031e-34	2.45958e-33	-2.53495	0.214579	-11.8136	3.32057e-32	2.40437e-31	7808.64	1347.32	1525.22
ASPN	6728.6	1.79582	0.160235	11.2074	3.75147e-29	2.00119e-28	1.79084	0.177786	10.073	7.27222e-24	3.64393e-23	2064.32	7142.8	7167.53
ECM2	1987.28	-2.67484	0.114261	-23.4099	3.39084e-121	2.26503e-119	-2.56878	0.126789	-20.2603	2.88006e-91	1.60594e-89	8314.65	1401.31	1302.06
TLE4	901.309	-1.28481	0.0949251	-13.535	9.71454e-42	8.01572e-41	-1.37575	0.105342	-13.0598	5.5853e-39	5.37705e-38	1955.61	753.601	802.692
LHX6	427.791	-1.77726	0.111414	-15.9519	2.76375e-57	3.75901e-56	-1.64178	0.123647	-13.278	3.10641e-40	3.15346e-39	1172.29	375.676	341.969
RLN2	107.396	1.49318	0.182714	8.17227	3.0264e-16	9.36929e-16	1.03068	0.20262	5.08678	3.64201e-07	7.52152e-07	43.7116	89.4357	168.236
KANK1	3085.67	-1.83745	0.0891843	-20.6028	2.5876e-94	9.36129e-93	-2.03584	0.0989635	-20.5717	4.92579e-94	3.06056e-92	9086.79	2215.88	2542.53
ELAVL2	193.93	2.73411	0.175709	15.5604	1.35164e-54	1.70783e-53	1.98676	0.194734	10.2024	1.93409e-24	9.95635e-24	35.1607	139.285	233.88
CA9	377.583	4.88201	0.288258	16.9363	2.43002e-64	3.97662e-63	4.42837	0.319393	13.865	1.03267e-43	1.21244e-42	14.9646	322.039	440.946
TYRP1	81.9645	3.8618	0.254141	15.1955	3.78749e-52	4.44951e-51	3.6128	0.28086	12.8633	7.23856e-38	6.62953e-37	8.13532	190.753	124.09
MPDZ	2585.36	-1.19254	0.0773135	-15.4248	1.11525e-53	1.37108e-52	-1.3344	0.0857915	-15.554	1.49576e-54	2.54124e-53	5372.22	2130.17	2350.54
APBA1	522.04	-1.21392	0.117667	-10.3166	5.92827e-25	2.67038e-24	-1.42514	0.130586	-10.9134	9.95072e-28	5.98143e-27	1110.24	413.445	478.614
SH3GL2	46.7872	1.79415	0.235455	7.61991	2.5386e-14	7.20602e-14	1.39797	0.260932	5.3576	8.43359e-08	1.81686e-07	15.5151	40.8611	53.7344
PTGDS	1551.5	-1.09403	0.170726	-6.40811	1.47331e-10	3.46875e-10	-1.28534	0.189437	-6.78506	1.1604e-11	3.16138e-11	3087.67	2015.28	1446.46
SHB	1102.27	1.00498	0.072733	13.8173	2.00345e-43	1.75443e-42	1.08876	0.0806731	13.496	1.65128e-41	1.76799e-40	568.394	1209.28	1140.92
GATA3	32999.7	1.79642	0.140152	12.8177	1.30549e-37	9.43888e-37	1.89241	0.155506	12.1694	4.52541e-34	3.5528e-33	10037.7	37265.6	34866.9
ATRNL1	557.696	1.28669	0.228184	5.63883	1.71209e-08	3.5804e-08	1.11639	0.253165	4.40975	1.03492e-05	1.92652e-05	250.222	667.879	610.481
CXCL12	8929.45	-1.95116	0.103686	-18.818	5.37735e-79	1.28662e-77	-1.91047	0.115047	-16.606	6.30805e-62	1.40137e-60	26972.2	7174.69	6975.24
CUBN	158.826	-1.57424	0.0995801	-15.8088	2.70624e-56	3.58367e-55	-1.69689	0.110603	-15.3422	3.99612e-53	6.43191e-52	405.357	125.155	136.31
UNC5B	4519.5	1.96169	0.0904541	21.6872	2.71273e-104	1.22054e-102	1.92613	0.100351	19.194	4.15454e-82	1.79895e-80	1250.07	4750.72	4869.37
CDH23	494.159	-2.01409	0.1162	-17.3329	2.65538e-67	4.67366e-66	-1.84558	0.128955	-14.3119	1.8444e-46	2.37961e-45	1520.84	423.195	376.58
VSIR	2134.94	-1.61027	0.0921195	-17.4802	2.02811e-68	3.74474e-67	-1.55988	0.102219	-15.2601	1.40932e-52	2.23527e-51	5432.96	1842.83	1779.54
ACTA2	21164.3	-1.61205	0.104313	-15.4539	7.10119e-54	8.80206e-53	-1.5276	0.115742	-13.1983	8.9752e-40	8.94413e-39	53669.1	18615.4	17557.1
TLX1	117.401	6.08154	0.338911	17.9443	5.31453e-72	1.09345e-70	5.13184	0.373386	13.744	5.52953e-43	6.27385e-42	2.18053	76.0497	146.884
KAZALD1	947.552	1.49571	0.136965	10.9204	9.20939e-28	4.65632e-27	1.6115	0.15194	10.6062	2.78956e-26	1.56529e-25	349.631	1068.32	985.892
NEURL1	842.557	3.47685	0.198703	17.4978	1.49031e-68	2.75954e-67	3.46557	0.220359	15.7269	9.88837e-56	1.75145e-54	160.221	910.458	917.607
MAP3K8	873.213	-1.06194	0.104143	-10.1969	2.04612e-24	9.00125e-24	-1.01593	0.115563	-8.79114	1.4805e-18	5.75841e-18	1636	808.987	783.631
DKK1	369.379	2.13733	0.247311	8.64225	5.51144e-18	1.83733e-17	2.02648	0.274339	7.38679	1.50417e-13	4.56923e-13	91.7742	373.933	403.749
EBF3	389.175	-2.77182	0.116753	-23.7409	1.36273e-124	1.00268e-122	-2.72848	0.129596	-21.0538	2.11227e-98	1.54259e-96	1711.53	258.212	250.715
SORCS1	511.594	1.59739	0.255197	6.25944	3.86365e-10	8.89116e-10	1.16542	0.283136	4.11613	3.85286e-05	6.86902e-05	193.716	434.517	586.232
UBE2S	1356.29	2.5279	0.10722	23.5769	6.652e-123	4.58426e-121	2.52252	0.118905	21.2147	6.99246e-100	5.34596e-98	256.193	1472.11	1477.46
DNAJC12	2595.15	2.08824	0.176701	11.8179	3.15354e-32	1.88059e-31	1.9891	0.196047	10.146	3.45088e-24	1.7607e-23	672.226	2668.79	2858.62
RUNDC3A	148.042	2.37522	0.209076	11.3606	6.5723e-30	3.59611e-29	1.7642	0.231798	7.61095	2.72093e-14	8.59074e-14	34.1362	256.707	329.052
CSF3	27.8848	-3.80611	0.305337	-12.4653	1.15501e-35	7.89861e-35	-3.38154	0.33903	-9.97416	1.97764e-23	9.74236e-23	170	16.3835	12.1742
PSMD3	13627.1	1.40934	0.117475	11.9969	3.68868e-33	2.27314e-32	1.35942	0.130344	10.4295	1.81845e-25	9.79653e-25	5521.28	16004.3	14665.3
RAPGEFL1	1361.14	1.40914	0.148196	9.50863	1.93181e-21	7.45746e-21	1.12055	0.16442	6.81518	9.41463e-12	2.58325e-11	572.908	1245.79	1521.63
ASPA	155.1	-3.61089	0.135238	-26.7002	4.68336e-157	6.15187e-155	-3.60405	0.150224	-23.9912	3.43698e-127	5.29674e-125	923.226	75.9197	75.5825
KRT37	19.3111	3.34425	0.246287	13.5787	5.35851e-42	4.48191e-41	3.43343	0.269617	12.7344	3.80525e-37	3.37302e-36	2.05475	22.2665	20.9172
HOXB6	504.228	1.55725	0.189447	8.21999	2.03526e-16	6.35718e-16	1.64033	0.21016	7.80517	5.94211e-15	1.94773e-14	180.079	561.246	529.858
RASD1	1662.11	-1.61399	0.157412	-10.2532	1.14439e-24	5.09392e-24	-1.51167	0.174663	-8.65477	4.93905e-18	1.87995e-17	4199.23	1472.71	1371.89
SLC6A4	782.996	3.88324	0.263916	14.7139	5.2497e-49	5.61154e-48	3.01736	0.292733	10.3075	6.51443e-25	3.42651e-24	66.3666	594.319	1044.5
ALDH3A1	145.977	-1.0963	0.256179	-4.27941	1.87388e-05	3.23646e-05	-2.55029	0.284423	-8.96653	3.06003e-19	1.23385e-18	327.795	74.8191	262.396
ICAM2	481.903	-1.48574	0.0896068	-16.5807	9.61361e-62	1.46769e-60	-1.38109	0.09945	-13.8873	7.56565e-44	8.90409e-43	1136.97	436.581	405.977
SYNGR2	16213.4	1.15188	0.0719547	16.0084	1.11567e-57	1.53557e-56	1.27825	0.0798357	16.011	1.07053e-57	2.04016e-56	7542.14	18293	16758.8
ASIC2	61.5871	1.6652	0.263558	6.31816	2.64689e-10	6.14167e-10	1.28261	0.292245	4.38882	1.13969e-05	2.11551e-05	22.125	53.8929	75.1667
CCL7	33.3263	3.6949	0.286388	12.9017	4.40115e-38	3.24564e-37	3.59583	0.315455	11.3989	4.23573e-30	2.82266e-29	2.81875	34.0203	36.4059
CCL2	1713.69	-1.11391	0.127965	-8.70481	3.181e-18	1.06973e-17	-1.2366	0.141991	-8.70902	3.06522e-18	1.17725e-17	3391.15	1439.15	1566.83
EZH1	2508.22	-1.33659	0.0575351	-23.2308	2.22313e-119	1.4173e-117	-1.30029	0.0638467	-20.3658	3.3607e-92	1.94028e-90	5515.85	2239.53	2183.93
DLX4	111.725	2.04802	0.156726	13.0675	5.04874e-39	3.82851e-38	2.00733	0.173559	11.5657	6.14567e-31	4.23979e-30	29.1603	117.255	120.576
COL1A1	397836	2.21746	0.128796	17.2168	1.98511e-66	3.40812e-65	2.32171	0.142906	16.2464	2.36851e-59	4.82879e-58	90569.7	452781	421215
SGCA	45.8758	-1.52514	0.157813	-9.66423	4.27832e-22	1.70332e-21	-1.20825	0.175193	-6.89668	5.32305e-12	1.48387e-11	351.568	46.4264	37.2098
LRRC59	12069.3	1.29458	0.0826144	15.6702	2.4191e-55	3.12519e-54	1.27141	0.0916627	13.8705	9.55666e-44	1.12271e-42	5215.39	12589.8	12793.6
CACNG1	98.7509	2.94943	0.215283	13.7002	1.01223e-42	8.65884e-42	3.06412	0.238254	12.8607	7.4865e-38	6.85226e-37	177.394	114.651	121.2
HLF	789.669	-2.83375	0.154403	-18.3529	3.12896e-75	6.98289e-74	-2.92238	0.171343	-17.0557	3.17001e-65	7.95428e-64	3614.88	476.845	507.034
SLC16A6	2378.2	2.47804	0.179696	13.7901	2.92159e-43	2.54932e-42	2.38888	0.199364	11.9825	4.38865e-33	3.30585e-32	472.119	2472.89	2630.55
EFNB3	427.041	-1.16768	0.136526	-8.55282	1.20114e-17	3.94906e-17	-1.27659	0.151507	-8.42595	3.57835e-17	1.30932e-16	874.315	360.899	389.246
MMD	1790.59	-2.87595	0.0984644	-29.208	1.5326e-187	4.99933e-185	-2.79431	0.109265	-25.5736	2.99959e-144	7.93352e-142	8173.68	1178.26	1113.39
RCVRN	9.31688	-1.22598	0.140717	-8.71238	2.97561e-18	1.00256e-17	-1.07881	0.156749	-6.88244	5.88362e-12	1.63502e-11	18.9478	8.94063	8.12626
MYH1	39.3276	-3.15761	0.173623	-18.1866	6.58944e-74	1.42036e-72	-2.5342	0.192776	-13.1458	1.79812e-39	1.7676e-38	1116.11	176.562	25.3876
SLC9A3R1	20907.9	1.79687	0.113644	15.8113	2.59875e-56	3.44365e-55	2.03503	0.126093	16.1392	1.35282e-58	2.68806e-57	6198.39	25403.3	21537.4
MYH3	140.132	-1.35905	0.0944325	-14.3917	5.83271e-47	5.79188e-46	-1.29888	0.104864	-12.3864	3.09771e-35	2.56574e-34	311.164	126.485	121.418
TMEM97	2379.52	1.52286	0.0999741	15.2325	2.15098e-52	2.54836e-51	1.4971	0.110912	13.4981	1.60407e-41	1.72027e-40	887.502	2505.34	2550.49
ALDOC	1363.45	-1.91405	0.144775	-13.2209	6.64865e-40	5.17199e-39	-1.93982	0.160646	-12.0752	1.42871e-33	1.09916e-32	4096.13	1067.65	1086.97
GABRA4	3.96561	-3.18792	0.32428	-9.83078	8.29738e-23	3.39812e-22	-3.88536	0.364664	-10.6546	1.65925e-26	9.39666e-26	21.6225	1.46412	8.98163
UGT2B10	5.3251	1.66935	0.425804	3.92047	8.83758e-05	0.000146249	1.58943	0.470697	3.37675	0.000733471	0.00117601	2.40845	16.3816	10.1371
CWH43	84.7185	1.98729	0.288994	6.87656	6.13154e-12	1.54628e-11	1.62994	0.32047	5.08611	3.65476e-07	7.54705e-07	24.1792	74.9234	95.9418
NMU	92.7083	3.48815	0.222929	15.647	3.48509e-55	4.47868e-54	2.82669	0.246599	11.4627	2.03137e-30	1.37096e-29	10.0244	191.322	112.313
KIAA1211	380.936	2.65919	0.146949	18.096	3.42588e-73	7.27238e-72	2.59467	0.162873	15.9306	3.88477e-57	7.2898e-56	65.9841	398.855	417.155
MAPK10	564.159	-2.001	0.144092	-13.8869	7.6014e-44	6.76249e-43	-2.14697	0.159906	-13.4264	4.23448e-41	4.46297e-40	1800.94	406.669	449.944
GALNT7	6979.33	1.22486	0.112528	10.885	1.35929e-27	6.82154e-27	1.31171	0.124853	10.5061	8.09781e-26	4.442e-25	3102.03	7700.54	7250.7
SOD3	1556.34	-2.37528	0.152849	-15.54	1.8595e-54	2.34196e-53	-2.10887	0.169601	-12.4343	1.70203e-35	1.42787e-34	5612.11	1301.23	1081.72
TRIM2	2778.35	-1.14645	0.130637	-8.77581	1.69674e-18	5.77841e-18	-1.5547	0.144956	-10.7253	7.74104e-27	4.44304e-26	5797.84	1973.58	2619.08
NEIL3	200.698	3.38519	0.121446	27.874	5.51183e-171	1.0274e-168	3.34747	0.134036	24.9744	1.15912e-137	2.4394e-135	21.121	214.975	220.636
SH3D19	4480.94	-2.05373	0.0728011	-28.2101	4.39068e-175	9.3407e-173	-2.0082	0.0807824	-24.8593	2.05079e-136	4.01381e-134	14265.3	3545.93	3435.86
NKX3-2	67.3471	2.95387	0.167267	17.6596	8.5891e-70	1.65133e-68	2.87297	0.184495	15.5721	1.12722e-54	1.92512e-53	9.60566	70.0671	74.0741
BST1	332.47	-1.21436	0.0820293	-14.804	1.37951e-49	1.50333e-48	-1.17947	0.0910558	-12.9533	2.25036e-38	2.10838e-37	682.832	301.405	294.201
HGFAC	20.0612	1.61013	0.19253	8.36302	6.11317e-17	1.95055e-16	1.48224	0.212686	6.96914	3.18876e-12	9.01886e-12	7.18417	20.1135	21.9452
FAM149A	243.731	-2.15077	0.106575	-20.1808	1.44519e-90	4.71421e-89	-2.18614	0.11833	-18.475	3.28102e-76	1.21621e-74	821.647	180.528	185.031
NCAPG	1094.79	3.07334	0.113302	27.1252	4.97395e-162	7.37502e-160	2.97024	0.125607	23.6471	1.26322e-123	1.80466e-121	144.402	1131.57	1215.35
PPARGC1A	230.511	-1.04907	0.194674	-5.38885	7.09082e-08	1.42971e-07	-1.93596	0.216088	-8.95917	3.27128e-19	1.31848e-18	481.422	125.796	232.617
CRYAB	7523.38	-2.71176	0.1915	-14.1606	1.60597e-45	1.50536e-44	-3.18026	0.212484	-14.9671	1.20512e-50	1.78146e-49	33835.7	3732.72	5164.83
ZBTB16	369.547	-3.11723	0.206579	-15.0898	1.89093e-51	2.17446e-50	-3.04103	0.229246	-13.2654	3.67689e-40	3.72099e-39	1850.66	224.831	213.313
B3GAT1	180.778	-1.11544	0.223574	-4.98914	6.0649e-07	1.1583e-06	-1.37182	0.248113	-5.52902	3.22024e-08	7.12648e-08	365	141.067	168.51
MS4A4A	741.374	-1.21089	0.108649	-11.145	7.57791e-29	4.00418e-28	-1.13872	0.120565	-9.4449	3.55742e-21	1.57525e-20	1508.83	685.241	651.772
ST3GAL4	2188.99	1.03215	0.0892772	11.5612	6.47918e-31	3.68635e-30	1.024	0.0990476	10.3385	4.71874e-25	2.49407e-24	1128.58	2294.96	2307.87
CCND1	33546.3	1.32896	0.134149	9.90661	3.89658e-23	1.61747e-22	1.19141	0.148845	8.00434	1.20108e-15	4.07691e-15	14531.2	33185.6	36505.3
CCKBR	35.0856	3.48218	0.353108	9.86152	6.11175e-23	2.51777e-22	1.98304	0.39091	5.07287	3.9186e-07	8.07229e-07	4.15326	32.9438	81.8888
HPX	1338.3	1.89134	0.197465	9.57811	9.88413e-22	3.87835e-21	1.74618	0.219081	7.97048	1.58062e-15	5.33654e-15	398.268	1618.66	1477.63
UPK2	32.5133	1.40806	0.17108	8.23045	1.86511e-16	5.83595e-16	1.15087	0.18937	6.07735	1.22182e-09	2.96621e-09	13.5951	42.6149	47.162
SLC1A2	1201.27	1.35211	0.178525	7.57375	3.62605e-14	1.02231e-13	1.64871	0.198066	8.32402	8.50263e-17	3.05402e-16	475.509	1491.07	1213.97
CD5	467.717	1.29095	0.146246	8.82725	1.07282e-18	3.68306e-18	1.09486	0.162235	6.7486	1.49278e-11	4.04553e-11	209.279	447.077	512.202
SCGB2A2	63938.5	1.48762	0.313901	4.73915	2.1462e-06	3.96053e-06	1.54973	0.348292	4.44951	8.60658e-06	1.61194e-05	24163.6	91543.3	67760.6
MDK	10555.5	1.42776	0.120531	11.8456	2.26882e-32	1.35879e-31	1.51183	0.133733	11.3048	1.24262e-29	8.13397e-29	4118.42	11744.9	11079.9
SLC22A18	1490.1	1.23981	0.100381	12.351	4.81347e-35	3.21314e-34	1.28704	0.11136	11.5575	6.76733e-31	4.65227e-30	663.311	1618.77	1566.58
SLC35F2	1184.18	1.17205	0.104163	11.2521	2.26202e-29	1.2156e-28	1.03544	0.115558	8.96038	3.23566e-19	1.3044e-18	565.003	1158.34	1273.26
VWF	13732.6	-2.16506	0.0939764	-23.0383	1.92563e-117	1.1741e-115	-1.91063	0.104273	-18.3233	5.39162e-75	1.93623e-73	44976.7	11962.7	10028.5
TSPAN11	371.303	-1.09783	0.122735	-8.94472	3.72902e-19	1.30703e-18	-1.04265	0.136202	-7.65513	1.93116e-14	6.14281e-14	707.67	343.637	330.83
CYP27B1	250.576	1.55998	0.139687	11.1677	5.8709e-29	3.11397e-28	1.46567	0.15489	9.46268	3.00149e-21	1.3336e-20	92.0673	254.527	271.579
KRT18	47125.1	1.55562	0.109479	14.2093	8.02477e-46	7.61323e-45	1.95298	0.121473	16.0775	3.66869e-58	7.14463e-57	15899	61557.2	46737.1
ACSS3	1595.17	-1.24267	0.132193	-9.40044	5.43376e-21	2.05467e-20	-1.25864	0.146682	-8.58079	9.42258e-18	3.54515e-17	3361.79	1404.92	1420.61
TNS2	5665.49	-1.70608	0.0778509	-21.9147	1.87981e-106	9.03972e-105	-1.52666	0.0863826	-17.6733	6.7392e-70	2.06416e-68	14897	5170.44	4565.77
FOXM1	2657.48	3.50926	0.127705	27.4793	3.10066e-166	5.05718e-164	3.24689	0.141643	22.9229	2.74356e-116	3.0684e-114	265.41	2519.27	3021.72
PRMT8	11.8785	2.00811	0.240466	8.35094	6.77225e-17	2.15733e-16	1.48347	0.265399	5.58959	2.27611e-08	5.09352e-08	3.46811	16.4778	23.1006
MYL2	3.57524	-1.64711	0.217161	-7.58477	3.33072e-14	9.40403e-14	-1.10629	0.241275	-4.58517	4.53625e-06	8.68638e-06	10995.1	131.268	9.91872
RAD51AP1	718.366	2.32454	0.106917	21.7414	8.32851e-105	3.82642e-103	2.03769	0.118545	17.1892	3.1975e-66	8.37771e-65	161.775	664.395	810.541
KCNA1	48.1097	-2.06385	0.200282	-10.3047	6.71043e-25	3.01576e-24	-2.20905	0.222461	-9.93005	3.08111e-23	1.50683e-22	158.198	34.1901	37.853
ALDH2	7561.1	-2.32453	0.109017	-21.3227	6.98413e-101	2.93964e-99	-2.20333	0.120962	-18.215	3.92248e-74	1.36846e-72	27138.2	5892.66	5417.82
OAS3	8331.72	1.48266	0.115099	12.8816	5.71594e-38	4.19784e-37	1.59493	0.127705	12.4892	8.55269e-36	7.25274e-35	3093.49	9344.82	8645.14
OAS2	7247.51	1.58932	0.131722	12.0657	1.60253e-33	1.00206e-32	1.76875	0.146149	12.1024	1.02571e-33	7.938e-33	2468.32	8411.06	7427.4
ART4	53.0372	-1.61875	0.209985	-7.70887	1.26939e-14	3.65468e-14	-2.35976	0.233341	-10.1129	4.84201e-24	2.44751e-23	148.272	47.2745	105.565
RERGL	147.552	-2.92399	0.21857	-13.3778	8.15332e-41	6.54003e-40	-2.58848	0.242565	-10.6713	1.38672e-26	7.88063e-26	669.673	111.391	88.2511
ADGRD1	294.841	-2.61753	0.141271	-18.5285	1.21703e-76	2.78919e-75	-2.48424	0.156795	-15.8439	1.54842e-56	2.84026e-55	1197.31	213.938	195.093
TBC1D30	1178.75	1.10693	0.0947788	11.6791	1.63056e-31	9.47267e-31	1.18702	0.10514	11.2899	1.47123e-29	9.6111e-29	568.671	1294.93	1225.06
IFNG	24.4811	1.95328	0.221058	8.83606	9.91544e-19	3.40884e-18	1.25155	0.244689	5.11484	3.1401e-07	6.51176e-07	7.51818	17.9228	29.1509
TIMELESS	2983.12	1.50277	0.0700078	21.4657	3.25496e-102	1.40632e-100	1.52142	0.0776602	19.5907	1.85756e-85	8.86734e-84	1116.56	3205.23	3164.05
CDCA3	907.747	3.10157	0.115472	26.8599	6.4564e-159	9.02605e-157	2.88719	0.127996	22.5568	1.15178e-112	1.18025e-110	119.554	884.521	1026.16
ENO2	2852.69	1.52638	0.124118	12.2978	9.3069e-35	6.14972e-34	1.49698	0.137706	10.8708	1.58774e-27	9.43965e-27	1061.95	2997.42	3059.13
GYS2	23.8804	-4.82482	0.225717	-21.3755	2.25841e-101	9.58822e-100	-5.37225	0.252638	-21.2646	2.41665e-100	1.87693e-98	193.837	4.68231	6.86514
COL12A1	34157.2	1.44497	0.123428	11.707	1.17377e-31	6.85763e-31	1.4711	0.13695	10.7419	6.46971e-27	3.72756e-26	13160.4	36484.9	35830.1
NEDD9	4128.86	-1.32116	0.101202	-13.0547	5.97819e-39	4.52281e-38	-1.38985	0.112293	-12.377	3.47979e-35	2.87006e-34	9125.29	3482.18	3652.08
FAM184A	316.876	-1.16603	0.11635	-10.0217	1.22339e-23	5.18385e-23	-1.32209	0.129139	-10.2377	1.34352e-24	6.96751e-24	650.993	260.321	290.069
NCOA7	3375.4	-1.00568	0.113484	-8.86191	7.86517e-19	2.71926e-18	-1.26679	0.125922	-10.0602	8.28633e-24	4.1457e-23	6408.36	2663.2	3191.58
SASH1	4379.15	-1.32439	0.0966842	-13.6981	1.04163e-42	8.9025e-42	-1.29769	0.10728	-12.0963	1.10431e-33	8.53617e-33	9568.95	3892.35	3821.03
UST	632.063	-1.1379	0.116124	-9.79898	1.13726e-22	4.63141e-22	-1.39435	0.128871	-10.8197	2.77534e-27	1.62875e-26	1293.2	491.923	587.675
ULBP1	97.1125	3.13512	0.186257	16.8322	1.4164e-63	2.28163e-62	2.83086	0.205925	13.747	5.30797e-43	6.02946e-42	12.4982	89.0222	109.979
BMP5	144.23	-1.20792	0.258672	-4.66972	3.01609e-06	5.50456e-06	-2.30992	0.287144	-8.04446	8.66245e-16	2.95987e-15	335.495	67.6343	171.342
BACH2	388.989	-1.36	0.115854	-11.7388	8.05823e-32	4.73621e-31	-1.4928	0.128584	-11.6095	3.68646e-31	2.56219e-30	882.696	313.628	343.958
RBM24	677.573	1.76583	0.222373	7.94083	2.00828e-15	6.00274e-15	1.10002	0.24672	4.4586	8.2497e-06	1.54821e-05	628.043	506.41	803.423
FHL5	149.638	-2.75626	0.132823	-20.7513	1.19214e-95	4.48702e-94	-2.37117	0.14744	-16.0822	3.39867e-58	6.62538e-57	629.014	121.559	93.0468
SIM1	162.409	-1.58221	0.2166	-7.30476	2.77759e-13	7.48594e-13	-2.4332	0.240455	-10.1191	4.54463e-24	2.30195e-23	441.987	142.594	212.756
BVES	251.141	-1.00929	0.115182	-8.76261	1.90776e-18	6.48465e-18	-1.37633	0.127869	-10.7636	5.11446e-27	2.96417e-26	636.132	186.424	240.448
GPLD1	115.635	-2.67602	0.1279	-20.9228	3.31909e-97	1.29922e-95	-2.79505	0.142102	-19.6693	3.94876e-86	1.92251e-84	497.676	71.623	77.8943
SOBP	325.639	-1.63926	0.110929	-14.7775	2.04482e-49	2.21357e-48	-1.62202	0.123123	-13.174	1.23878e-39	1.22575e-38	841.118	273.338	270.099
EPM2A	472.074	-1.16334	0.0624994	-18.6137	2.48975e-77	5.78047e-76	-1.19317	0.0693873	-17.1957	2.85839e-66	7.50931e-65	950.306	415.212	423.94
PACRG	43.2218	-1.68863	0.132965	-12.6998	5.93137e-37	4.21375e-36	-1.70445	0.147808	-11.5315	9.1526e-31	6.25689e-30	115.571	35.4858	35.9201
QKI	5666.53	-1.26529	0.0719671	-17.5815	3.41404e-69	6.43114e-68	-1.38394	0.0798556	-17.3306	2.76438e-67	7.60964e-66	12195.5	4672.75	5073.45
C6orf118	6.53405	2.39805	0.353216	6.78919	1.12765e-11	2.81007e-11	1.9302	0.389144	4.96012	7.04498e-07	1.42708e-06	1.4172	7.23141	9.05136
DNPH1	1410.39	1.03609	0.101521	10.2057	1.86999e-24	8.24499e-24	1.13594	0.112627	10.0858	6.38141e-24	3.20989e-23	713.065	1567.04	1462.12
TTK	928.801	2.90945	0.121178	24.0097	2.20401e-127	1.73939e-125	2.63193	0.134356	19.5893	1.9077e-85	9.08457e-84	140.369	870.294	1054.85
LAMA4	7282.5	-1.55351	0.0881763	-17.6182	1.78468e-69	3.39454e-68	-1.5016	0.0978389	-15.3476	3.67346e-53	5.91744e-52	17944.2	6337.12	6113.18
CLIC5	560.503	-2.54988	0.122574	-20.8027	4.0893e-96	1.56015e-94	-2.29331	0.136026	-16.8594	8.94625e-64	2.14578e-62	2191.02	446.861	374.113
ENPP5	3349.16	1.18636	0.147597	8.03783	9.1444e-16	2.77136e-15	1.40458	0.163761	8.57698	9.73961e-18	3.66091e-17	1492.62	3951.7	3396.98
TBX18	435.465	-1.17538	0.120131	-9.78412	1.31738e-22	5.35375e-22	-1.30784	0.133321	-9.80971	1.02261e-22	4.88038e-22	894.447	361.186	396.094
SEMA5A	2884.03	-1.47731	0.116483	-12.6826	7.38196e-37	5.22909e-36	-1.45164	0.129249	-11.2313	2.86075e-29	1.8491e-28	6851.93	2505.1	2460.93
C7	1614.31	-2.02457	0.213312	-9.49112	2.28573e-21	8.79598e-21	-1.72279	0.236685	-7.27881	3.36782e-13	1.00266e-12	4917.22	1489.71	1208.54
GHR	1902.83	-3.18306	0.132981	-23.9361	1.28814e-126	9.88688e-125	-3.08251	0.147561	-20.8898	6.6321e-97	4.57054e-95	9753.25	1151.32	1073.86
KIF20A	1701.81	3.36575	0.115853	29.0518	1.45825e-185	4.32436e-183	3.3479	0.128458	26.0622	9.78077e-150	3.08757e-147	180.947	1841.68	1864.56
MRPS30	7711.85	1.6949	0.139461	12.1532	5.51522e-34	3.52182e-33	1.53973	0.154737	9.95063	2.50592e-23	1.23015e-22	2623.53	7627.58	8493.76
HBEGF	718.122	-1.11229	0.102166	-10.8871	1.32803e-27	6.66979e-27	-1.13275	0.113374	-9.9912	1.66548e-23	8.22944e-23	1405.07	640.802	649.875
GZMK	342.444	1.51738	0.172824	8.77988	1.63648e-18	5.57902e-18	1.35998	0.191705	7.09412	1.30181e-12	3.75631e-12	131.125	336.66	375.506
PDE8B	759.843	-1.38211	0.128342	-10.7689	4.82545e-27	2.36582e-26	-1.3668	0.142416	-9.59722	8.21291e-22	3.75305e-21	1721.46	667.413	660.423
PCDHB15	131.558	-1.24171	0.095469	-13.0064	1.12458e-38	8.4363e-38	-1.25288	0.106025	-11.8168	3.19577e-32	2.31915e-31	276.975	116.178	117.189
IL12B	18.9094	2.16026	0.193656	11.1551	6.75959e-29	3.57854e-28	2.02763	0.213192	9.51084	1.89132e-21	8.47649e-21	4.65158	19.0533	20.8907
RASGRF2	936.213	-1.47154	0.100729	-14.6089	2.46511e-48	2.58006e-47	-1.47558	0.11178	-13.2008	8.68557e-40	8.66432e-39	2220.52	798.348	800.682
GABRG2	6.18289	2.82825	0.580433	4.87265	1.10109e-06	2.06998e-06	2.75981	0.640921	4.30601	1.66222e-05	3.04359e-05	1.0037	17.9114	58.0139
LMNB1	3561.31	2.44117	0.0930144	26.2451	8.13647e-152	9.65133e-150	2.41598	0.10318	23.4153	2.98793e-121	3.77289e-119	712.597	3803.21	3870.19
ARRDC3	6071.45	-1.43632	0.0786817	-18.2548	1.89364e-74	4.13181e-73	-1.45278	0.0873049	-16.6403	3.55965e-62	7.98046e-61	14145.4	5167.48	5226.9
NPR3	1250.58	-2.04646	0.175775	-11.6425	2.50553e-31	1.44656e-30	-2.27133	0.195044	-11.6452	2.42686e-31	1.6988e-30	4075.65	844.203	986.638
SLC27A6	251.569	-2.07726	0.206897	-10.0401	1.01617e-23	4.32829e-23	-2.14884	0.229605	-9.35885	8.06125e-21	3.50845e-20	809.146	182.481	191.735
AGXT2	14.0979	1.22296	0.198311	6.16688	6.96512e-10	1.57816e-09	1.2266	0.219081	5.59882	2.15816e-08	4.83456e-08	6.35188	14.8757	14.9013
PRLR	14578	1.17035	0.119292	9.8108	1.0116e-22	4.12995e-22	1.17688	0.132361	8.89148	6.0299e-19	2.39629e-18	6812.5	15402.4	15332.9
FGF1	1076.12	-2.13847	0.107334	-19.9236	2.54209e-88	7.77404e-87	-1.99178	0.119106	-16.7228	8.94255e-63	2.04467e-61	3518.06	884.505	799.056
NR3C1	4082.93	-1.73069	0.0806498	-21.4593	3.7418e-102	1.6131e-100	-1.7376	0.0894906	-19.4165	5.59673e-84	2.54151e-82	11134.9	3338.85	3354.98
LIFR	3074.06	-2.58483	0.113436	-22.7866	6.22566e-115	3.59436e-113	-2.57246	0.125871	-20.4373	7.7933e-93	4.62213e-91	12547.5	2109.39	2091.47
H2AFY	15042.5	1.05656	0.0436552	24.2024	2.09874e-129	1.73318e-127	1.10769	0.0484344	22.8698	9.27767e-116	1.02013e-113	7543.11	16255.3	15689.4
UNC5A	497.521	2.12459	0.191955	11.0681	1.79128e-28	9.32667e-28	2.74018	0.212897	12.8709	6.56065e-38	6.02558e-37	109.092	729.037	475.818
EHHADH	746.654	-1.02492	0.0838433	-12.2242	2.30768e-34	1.50252e-33	-1.25214	0.0930546	-13.456	2.83982e-41	3.00926e-40	1427.87	599.316	701.572
SMC4	3728.49	1.50564	0.0931839	16.1578	1.00126e-58	1.418e-57	1.388	0.103384	13.4257	4.27435e-41	4.50256e-40	1423.35	3725.13	4041.71
BCL6	4142.63	-1.15207	0.078749	-14.6297	1.81563e-48	1.90642e-47	-1.16045	0.0873801	-13.2805	3.00541e-40	3.05251e-39	8284.61	3706.33	3727.9
HGD	619.162	1.04114	0.205581	5.06438	4.09722e-07	7.89979e-07	1.26008	0.228083	5.52465	3.30143e-08	7.3012e-08	302.599	724.834	622.782
AMOTL2	4773.5	-1.49936	0.0743738	-20.1598	2.20646e-90	7.13801e-89	-1.47975	0.082526	-17.9307	6.78992e-72	2.21119e-70	11477.6	4115.2	4059.64
RBP2	24.3837	1.81886	0.196416	9.26025	2.03957e-20	7.53605e-20	1.43875	0.217164	6.62517	3.46845e-11	9.22847e-11	7.84053	29.2415	27.851
KAT2B	1157.34	-1.46458	0.0787784	-18.5912	3.78636e-77	8.74931e-76	-1.43496	0.0874235	-16.4139	1.52134e-60	3.23649e-59	2726.11	1008.06	987.636
LRRC31	356.754	2.32451	0.276746	8.39943	4.48665e-17	1.43908e-16	2.43323	0.306984	7.92623	2.25894e-15	7.56407e-15	75.2137	406.478	376.986
PFKFB4	755.795	1.28157	0.0736274	17.4061	7.41747e-68	1.33802e-66	1.28688	0.0816421	15.7625	5.63784e-56	1.01233e-54	327.559	799.581	796.618
ECT2	3316.16	1.8606	0.0846513	21.9796	4.51465e-107	2.20351e-105	1.8388	0.0939076	19.5809	2.25029e-85	1.069e-83	980.859	3508.88	3562.32
HYAL1	203.139	-1.69313	0.12981	-13.0431	6.9583e-39	5.25619e-38	-1.20195	0.144047	-8.34419	7.17022e-17	2.58588e-16	505.829	220.094	156.452
GBE1	2193.51	-1.55456	0.0742796	-20.9285	2.94581e-97	1.15774e-95	-1.6202	0.0824276	-19.656	5.13505e-86	2.4877e-84	5483.45	1783.51	1866.59
C3orf52	954.885	1.54953	0.126777	12.2224	2.35919e-34	1.53504e-33	1.51999	0.140636	10.808	3.15619e-27	1.84562e-26	349.763	1003.31	1024.11
PODXL2	2932.73	1.704	0.118878	14.334	1.34185e-46	1.31576e-45	1.7609	0.131889	13.3514	1.16291e-40	1.20426e-39	954.863	3236.3	3111.05
CSPG5	145.642	1.06916	0.128352	8.32989	8.09206e-17	2.56898e-16	1.00743	0.142303	7.07944	1.44739e-12	4.16471e-12	73.8637	148.362	154.775
KIAA1257	162.675	1.85048	0.130788	14.1487	1.90304e-45	1.78041e-44	2.0512	0.144851	14.1607	1.60375e-45	2.00566e-44	46.7122	193.817	168.644
PLSCR4	1552.51	-2.14888	0.0915163	-23.4809	6.39343e-122	4.3149e-120	-2.13011	0.101556	-20.9747	1.11554e-97	7.9684e-96	5191.94	1185.94	1170.66
CISH	3364.48	1.044	0.102196	10.2156	1.68756e-24	7.45744e-24	1.19749	0.113386	10.5613	4.50572e-26	2.4996e-25	1668.43	3826.38	3440.18
PEX5L	186.256	2.1077	0.219741	9.59176	8.65974e-22	3.40612e-21	1.56614	0.243706	6.42634	1.30715e-10	3.36227e-10	50.9962	261.674	361.077
ABCC5	4704.86	1.03939	0.0999924	10.3947	2.62024e-25	1.19933e-24	1.30324	0.110941	11.7471	7.31218e-32	5.21362e-31	2293.13	5659.02	4713.3
AADAC	48.0517	-3.90005	0.298183	-13.0794	4.31884e-39	3.28265e-38	-4.76929	0.331559	-14.3845	6.479e-47	8.4764e-46	326.109	11.9897	21.9515
CLCN2	598.463	1.34302	0.0747368	17.9701	3.34311e-72	6.89477e-71	1.25346	0.0828622	15.127	1.07419e-51	1.64251e-50	254.134	606.198	644.956
CCL20	73.5383	2.47335	0.197872	12.4998	7.48589e-36	5.14445e-35	1.70363	0.219155	7.7736	7.62881e-15	2.48603e-14	15.933	60.3364	97.4327
CENPA	437.463	3.31121	0.129608	25.5479	5.7933e-144	6.09605e-142	3.07663	0.143533	21.435	6.30038e-102	5.18114e-100	49.9688	421.264	495.548
FNDC4	461.334	-1.49483	0.108821	-13.7367	6.12327e-43	5.27718e-42	-1.45953	0.120769	-12.0853	1.26238e-33	9.7465e-33	1104.26	401.587	391.832
PDE1A	282.944	-1.28185	0.0982607	-13.0454	6.74753e-39	5.09895e-38	-1.07953	0.109052	-9.8992	4.19604e-23	2.03936e-22	589.793	279.023	242.569
REEP6	4105.86	1.19016	0.157768	7.54376	4.56605e-14	1.27922e-13	1.25597	0.175048	7.17497	7.23248e-13	2.11432e-12	1886.44	4505.51	4304.53
PCSK4	312.137	1.51158	0.134636	11.2272	2.99786e-29	1.604e-28	1.53462	0.149298	10.2789	8.77196e-25	4.58193e-24	116.479	337.656	332.202
GRB14	698.231	1.80137	0.231181	7.79201	6.59495e-15	1.92968e-14	1.09867	0.256493	4.28341	1.84053e-05	3.35909e-05	239.736	579.234	898.286
CLIP4	1212.87	-1.73822	0.117648	-14.7748	2.13127e-49	2.30587e-48	-1.9766	0.130554	-15.1401	8.80779e-52	1.35311e-50	3403.04	864.635	1020.01
TLX2	9.36985	2.13158	0.211539	10.0766	7.01457e-24	3.00941e-23	2.13705	0.231463	9.23279	2.63678e-20	1.118e-19	2.29817	10.1623	10.112
SPTBN1	22751.5	-2.04986	0.0675639	-30.3396	3.45001e-202	1.57032e-199	-2.13765	0.0749676	-28.5143	7.78587e-179	8.46583e-176	73555.5	16715.3	17764
TACR1	282.239	-2.60886	0.173565	-15.031	4.5986e-51	5.23278e-50	-2.64939	0.192631	-13.7537	4.83669e-43	5.5005e-42	1173.63	187.089	192.432
ACADL	131.051	-3.2914	0.237385	-13.8652	1.0288e-43	9.0947e-43	-3.57208	0.263533	-13.5546	7.44229e-42	8.12838e-41	716.664	60.2485	73.242
EFEMP1	7733.66	-1.91227	0.134955	-14.1697	1.41173e-45	1.32647e-44	-2.02463	0.149743	-13.5207	1.18071e-41	1.27321e-40	23439.5	5760.72	6227.22
FN1	273103	2.82887	0.123489	22.9079	3.87828e-116	2.3142e-114	2.81714	0.137018	20.5603	6.21837e-94	3.85145e-92	41668.3	293663	296060
STAT1	22080.6	1.22071	0.101821	11.9888	4.06859e-33	2.50174e-32	1.05309	0.112976	9.32141	1.14802e-20	4.95227e-20	10235.8	21239	23855.7
DNAH6	131.561	-1.04086	0.133842	-7.7768	7.43797e-15	2.17051e-14	-1.31196	0.148604	-8.82856	1.06035e-18	4.15646e-18	255.503	102.878	124.262
PECR	689.345	-1.39219	0.0827596	-16.8221	1.6804e-63	2.70245e-62	-1.34563	0.0918475	-14.6507	1.33311e-48	1.84132e-47	1562.57	614.69	595.145
ELMOD3	1561.51	-1.44899	0.0585263	-24.7579	2.54847e-135	2.30919e-133	-1.4271	0.0649526	-21.9715	5.40004e-107	4.82601e-105	3661.09	1361.45	1341
EHBP1	2675.94	-1.27909	0.0601229	-21.2746	1.95289e-100	8.11508e-99	-1.39341	0.0667194	-20.8846	7.39061e-97	5.0754e-95	5810.48	2211.68	2394.13
OTX1	234.952	2.59658	0.166461	15.5987	7.43233e-55	9.51377e-54	2.26953	0.184487	12.3019	8.848e-35	7.16776e-34	44.4797	214.501	269.035
HSPE1	5467.83	1.16364	0.0711218	16.3613	3.61462e-60	5.28344e-59	1.10931	0.0789078	14.0582	6.85725e-45	8.3464e-44	2603.39	5616.76	5832.23
SMYD1	251.73	-4.92492	0.285678	-17.2394	1.34423e-66	2.31391e-65	-4.93715	0.317074	-15.5709	1.14714e-54	1.95573e-53	2038.23	66.5211	67.0674
MLPH	19258.4	1.4929	0.147821	10.0993	5.56262e-24	2.39858e-23	1.65308	0.164015	10.0788	6.85246e-24	3.43712e-23	7098.81	22326.3	19980
PASK	1080.2	1.12133	0.0663122	16.9098	3.80952e-64	6.21333e-63	1.07189	0.0735459	14.5744	4.08489e-48	5.55205e-47	527.491	1109.18	1147.88
TPO	162.397	-1.59768	0.128288	-12.4539	1.33168e-35	9.08141e-35	-1.36158	0.142385	-9.56266	1.14773e-21	5.20346e-21	399.021	155.268	131.894
PROC	50.63	2.52825	0.120331	21.0108	5.22417e-98	2.09523e-96	2.41114	0.132108	18.2512	2.02234e-74	7.10613e-73	9.64308	51.6129	55.9416
DLX2	185.145	2.16327	0.266245	8.12511	4.46956e-16	1.37049e-15	1.77243	0.295307	6.002	1.94901e-09	4.66446e-09	47.6835	185.396	213.648
SDC1	22859.2	1.86674	0.115057	16.2245	3.38551e-59	4.84719e-58	2.01392	0.127661	15.7756	4.58325e-56	8.25999e-55	6538.34	26407.2	23846.1
RND3	3207.1	-1.33264	0.108676	-12.2625	1.43932e-34	9.44678e-34	-1.51191	0.120587	-12.5379	4.63232e-36	3.96605e-35	7244.65	2540.38	2876.46
PCYOX1	9219.02	-1.0927	0.0652687	-16.7415	6.5307e-63	1.02831e-61	-1.1235	0.0724214	-15.5134	2.81731e-54	4.74122e-53	17851.8	8193.34	8370.2
KISS1R	76.0152	3.99974	0.238532	16.7682	4.1729e-63	6.60243e-62	4.65935	0.26283	17.7276	2.56656e-70	7.99885e-69	4.53735	114.791	72.6564
EPAS1	11558.9	-2.01374	0.0834611	-24.1279	1.27522e-128	1.03994e-126	-1.85958	0.0926065	-20.0805	1.0933e-89	5.84649e-88	35616.6	9814.37	8819.71
VAX2	136.668	1.15244	0.15418	7.47466	7.74009e-14	2.14452e-13	1.0946	0.170962	6.40261	1.52742e-10	3.91343e-10	65.7282	140.425	146.12
PARD3B	1248.21	-1.17713	0.0708997	-16.6027	6.66139e-62	1.02176e-60	-1.20273	0.078681	-15.2861	9.45817e-53	1.505e-51	2528.27	1098.24	1117.98
BCL9	3865.92	1.23193	0.0667944	18.4436	5.86682e-76	1.329e-74	1.18701	0.0741024	16.0185	9.49494e-58	1.81302e-56	1750.38	3985.34	4111.55
MARK1	527.687	-1.15576	0.12824	-9.01247	2.01458e-19	7.1417e-19	-1.16799	0.142307	-8.20756	2.25721e-16	7.94856e-16	1057.05	470.341	474.391
TNR	61.8264	2.49144	0.187196	13.3093	2.04476e-40	1.62156e-39	1.78881	0.207181	8.63406	5.92119e-18	2.24549e-17	13.2857	55.0001	113.744
TPSG1	210.724	2.41156	0.250104	9.64221	5.30344e-22	2.10204e-21	2.54031	0.277342	9.15947	5.2154e-20	2.17831e-19	42.2544	245.885	224.897
PAPPA2	76.3204	-2.54156	0.174491	-14.5656	4.6522e-48	4.82016e-47	-2.60287	0.193793	-13.4312	3.96991e-41	4.18637e-40	308.87	50.8893	53.0677
RALGPS2	4524.18	1.14721	0.108667	10.5571	4.70824e-26	2.21673e-25	1.13344	0.120567	9.40087	5.41119e-21	2.37355e-20	2158.88	4736.35	4781.82
ANGPTL1	333.593	-3.2057	0.14743	-21.7439	7.89296e-105	3.63485e-103	-3.06239	0.163632	-18.7151	3.73209e-78	1.43506e-76	1715.35	205.304	186.071
OPRD1	184.094	2.86974	0.204403	14.0396	8.91791e-45	8.18674e-44	2.57927	0.226515	11.3868	4.8675e-30	3.23596e-29	28.831	172.178	210.651
KCNC4	905.888	-1.33388	0.101987	-13.0788	4.35023e-39	3.30523e-38	-1.50773	0.11318	-13.3216	1.73354e-40	1.78104e-39	2048.58	720.487	812.764
SCAMP3	6254.13	1.01006	0.0561955	17.974	3.11494e-72	6.43098e-71	1.09438	0.0623457	17.5534	5.5997e-69	1.65805e-67	3218.46	6871.97	6481.62
DLGAP3	62.293	1.59542	0.161589	9.87334	5.43255e-23	2.24127e-22	1.51491	0.178924	8.46678	2.52261e-17	9.29801e-17	22.4004	64.0192	67.6073
RHOU	1792.33	-1.59093	0.114583	-13.8846	7.85501e-44	6.97859e-43	-1.24833	0.127139	-9.81862	9.36127e-23	4.47639e-22	4314.74	1816.24	1432.37
[truncated: 3,252 more rows]

## Sheet: HNSC
DEGs	baseMean	log2FoldChange.early	lfcSE.early	stat.early	pvalue.early	padj.early	log2FoldChange.advanced	lfcSE.advanced	stat.advanced	pvalue.advanced	padj.advanced	Mean.HC	Mean.Early	Mean.Advanced
[truncated: 3,812 more rows]

[truncated: 8 more sheets: KICH, KIRC, KIRP, LIHC, LUAD, LUSC, STAD, THCA]
