# Supplementary material for: Integrated Analysis of MicroRNA (miRNA) and mRNA Profiles Reveals Reduced Correlation between MicroRNA and Target Gene in Cancer
Source: Biomed Res Int. 2018 Dec 6;2018:1972606. doi: 10.1155/2018/1972606 (PMC6304515; doi:10.1155/2018/1972606)
Supplement: Supplementary Materials — Figure S1. Expression density distribution of mRNAs and miRNAs before and after filtering. Figure S2. Distribution of the PCC values of critical miRNA-target gene pairs in healthy controls and 4 clinically staged tumors. Figure S3: Simple correlations coefficients (Cor) and partial correlation coefficients (Pcor) of critical pairs in normal and tumor samples of LIHC. Figure S4: Simple correlations coefficients (Cor) and partial correlation coefficients (Pcor) of critical pairs in normal and tumor samples of LUAD. Figure S5: Simple correlations coefficients (Cor) and partial correlation coefficients (Pcor) of critical pairs in tumor samples of LIHC. Figure S6: Simple correlations coefficients (Pearson correlation coefficient) and partial correlation coefficients (given CNAs effects) of critical pairs in cancer samples of LUAD. Table S1: Sample sizes for each cancer type. Table S2. Sample clinical and grouping information for each cancer type. Table S3. List of DEMs for each cancer type. Table S4. List of DEGs for each cancer type. Table S5. Frequency of DEMs and DEGs in 11 cancer types. Table S6. List of critical miRNA-target gene pairs for each cancer type. Table S7: Interactional references and gene functional references for some critical miRNA-target pairs. Table S8. Frequency of critical miRNA-target pairs in 11 cancer types. Table S9. List of the significantly GO annotation terms (p < 0.05) for the critical target genes in each cancer type. Table S10. List of the significantly KEGG pathway terms (p < 0.05) for the critical target genes in each cancer type. Table S11. Partial and simple correlation coefficients for each critical pair in normal and tumor samples of LUAD and LIHC when controlling methylation or CNAs effect. [file 1972606.f1.zip › 1972606.f1/Table S5_BMRI_2598514.xlsx]

## Sheet: Total DEGs
DEGs	BLCA	BRCA	HNSC	KICH	KIRC	KIRP	LIHC	LUAD	LUSC	STAD	THCA	Frequency
IBSP	up	up	up	up	up	up	up	up	up	up	up	11
TGFBR3	down	down	down	down	down	down	down	down	down	down	down	11
MIOX	up	up	up	down	down	down	up	up	up	up	down	11
MYBL2	up	up	up	up	up	up	up	up	up	up	down	11
E2F1	up	up	up	up	up	up	up	up	up	up	up	11
ASF1B	up	up	up	up	up	up	up	up	up	up	up	11
CNTD2	up	up	up	down	down	down	up	up	up	up	up	11
CXCL12	down	down	down	down	down	down	down	down	down	down	down	11
C7	down	down	down	down	down	down	down	down	down	down	down	11
KREMEN2	up	up	up	up	up	up	up	up	up	up	up	11
ADGRB3	down	down	down	down	down	down	down	down	down	down	up	11
DPT	down	down	down	down	down	down	down	down	down	down	down	11
DTL	up	up	up	up	up	up	up	up	up	up	up	11
CDKN2A	up	up	up	up	up	up	up	up	up	up	up	11
PI16	down	down	down	down	down	down	down	down	down	down	down	11
E2F7	up	up	up	up	up	up	up	up	up	up	up	11
CDT1	up	up	up	up	up	up	up	up	up	up	up	11
TNXB	down	down	down	down	down	down	down	down	down	down	down	11
DES	down	down	down	down	down	down	down	down	down	down	down	11
NXPH4	up	up	up	up	up	up	up	up	up	up	up	11
C14orf180	down	down	down	down	up	down	down	down	down	down	down	11
TCEAL2	down	down	down	down	down	down	down	down	down	down	down	11
ADH1B	down	down	down	down	down	down	down	down	down	down	down	11
GPC2	up	up	up	up	up	up	up	up	up	up	up	11
TUBB3	up	up	up	up	up	up	up	up	up	up	up	11
FXYD1	down	down	down	down	up	down	down	down	down	down	down	11
CELSR3	up	up	up	up	up	up	up	up	up	up		10
ANLN	up	up	up	up	up	up	up	up	up	up		10
DCN	down	down		down	down	down	down	down	down	down	down	10
FHL1	down	down	down	down	up	up		down	down	down	down	10
DEPDC1	up	up	up	up	up	up	up	up	up	up		10
ROS1	up	up	up	down	down	down	up		down	up	up	10
POLQ	up	up	up	up	up	up	up	up	up	up		10
MCM10	up	up	up	up	up	up	up	up	up	up		10
ASPM	up	up	up	up	up	up	up	up	up	up		10
PITX1	down	up	down	up	up	up	up	up	up	down		10
CAMK2A	down	up	down	down	down	down	up	down	down	down		10
HMMR	up	up	up	up	up	up	up	up	up	up		10
GTSE1	up	up	up	up	up	up	up	up	up	up		10
SMC1B	up	up	up	up	up	up	up	up	up	up		10
NDC80	up	up	up	up	up	up	up	up	up	up		10
TPX2	up	up	up	up	up	up	up	up	up	up		10
BIRC5	up	up	up	up	up	up	up	up	up	up		10
KIF4A	up	up	up	up	up	up	up	up	up	up		10
ORC6	up	up	up	up	up	up	up	up	up	up		10
CLSPN	up	up	up	up	up	up	up	up	up	up		10
CDC45	up	up	up	up	up	up	up	up	up	up		10
SMIM24	up		up	up	down	down	down	up	up	down	up	10
MMP11	up	up	up		up	up	up	up	up	up	up	10
43346	up	up	up	up		up	up	up	up	up	up	10
CDKN3	up	up	up	up	up	up	up	up	up	up		10
MMP9	up	up	up	up	up	up	up	up	up	up		10
SALL4	up	up	up	up	up		up	up	up	up	down	10
EEF1A2	up	up	down	up	up	up	up	up	up		up	10
VSIG1	down	up	up	down	up	up	up	up		down	up	10
CHRDL1	down	down	down	down	down	down		down	down	down	down	10
OIP5	up	up	up	up	up	up	up	up	up	up		10
AMH	up	up	up	up	up	up	up	up	up	up		10
TNNT1	up	up	down		up	up	up	up	up	up	up	10
MAST1	up	up	up	up	up	up	up	up	up		up	10
NEIL3	up	up	up	up	up	up	up	up	up	up		10
NCAPG	up	up	up	up	up	up	up	up	up	up		10
FOXM1	up	up	up	up	up	up	up	up	up	up		10
TTK	up	up	up	up	up	up	up	up	up	up		10
KIF20A	up	up	up	up	up	up	up	up	up	up		10
HRG	up		up	down	down	down	down	up	up	up	up	10
CENPA	up	up	up	up	up	up	up	up	up	up		10
KISS1R	up	up	up		up	up	up	up	up	up	up	10
VAX2	up	up	up	up	up		up	up	up	up	up	10
CDC20	up	up	up	up	up	up	up	up	up	up		10
NEK2	up	up	up	up	up	up	up	up	up	up		10
CENPF	up	up	up	up	up	up	up	up	up	up		10
KIF14	up	up	up	up	up	up	up	up	up	up		10
TCF21	down	down	down	down	down	down	down	down	down	down		10
C2orf40	down	down	down	down	down	down	down	down	down	down		10
NR4A3	down	down	down		down	down	down	down	down	down	down	10
EGR1	down	down	down	down		down	down	down	down	down	down	10
NCAPH	up	up	up	up	up	up	up	up	up	up		10
MND1	up	up	up	up	up	up	up	up	up	up		10
PTGFR	down	down	down		down	down	up	down	down	down	down	10
PLAU	up	up	up	down	down	down		up	up	up	up	10
CENPK	up	up	up		up	up	up	up	up	up	up	10
HJURP	up	up	up	up	up	up	up	up	up	up		10
HIST1H2BJ	up	up	up	up	up	up	up	up	up	up		10
FOSB	down	down	down	down		down	down	down	down	down	down	10
DLGAP5	up	up	up	up	up	up	up	up	up	up		10
PKMYT1	up	up	up	up	up	up	up	up	up	up		10
GNGT1	up	up	up	up	up	up	up	up	up	up		10
PIMREG	up	up	up		up	up	up	up	up	up	up	10
TNNI3	up	up		up	up	up	up	up	up	up	up	10
APOC1	up	up	up	up	up	up		down	down	up	up	10
DPP6	down	down	down	down	down	down		down	down	down	down	10
TOP2A	up	up	up	up	up	up	up	up	up	up		10
GSTM5	down	down	down		down	down	down	down	down	down	down	10
ACRV1	up	up	up	up	up	up	up	up	up	up		10
TROAP	up	up	up	up	up	up	up	up	up	up		10
IGF2BP3	up	up	up	up	up	up	up	up	up	up		10
BRIP1	up	up		up	up	up	up	up	up	up	up	10
MMP13	up	up	up	up	up		up	up	up	up	up	10
GCOM1	down	down	down	up	down	down		down	down	down	down	10
AOX1	down	down	down	down	down	down	down		down	down	down	10
CENPE	up	up	up	up	up	up	up	up	up	up		10
NTRK3	down	down	down	down		down	down	down	down	down	up	10
KIF2C	up	up	up	up	up	up	up	up	up	up		10
CCNA2	up	up	up	up	up	up	up	up	up	up		10
CDCA5	up	up	up	up	up	up	up	up	up	up		10
STRA8	up	up	up	down	up	up	up	up	up	up		10
MKI67	up	up	up	up	up	up	up	up	up	up		10
FAM57B	up	up	down	up	up	up	up	up	up		up	10
IGSF10	down	down	down	down	down	down		down	down	down	down	10
SPARCL1	down	down	down	up	up	down	up	down	down	down		10
PDE1C	down	down	down	up		down	up	down	down	down	up	10
SKA1	up	up	up	up	up	up	up	up	up	up		10
BUB1B	up	up	up	up	up	up	up	up	up	up		10
CCNB2	up	up	up	up	up	up	up	up	up	up		10
CDC25C	up	up	up	up	up	up	up	up	up	up		10
DRC7	up	up	down	down		up	up	down	down	up	down	10
SPC24	up	up	up	up	up	up	up	up	up	up		10
TEDC2	up	up	up	up		up	up	up	up	up	up	10
PAQR4	up	up		up	up	up	up	up	up	up	up	10
EN1	up	up	up	up	up	up	up		up	up	up	10
C1QTNF7	down	down	down	down	down	down		down	down	down	down	10
DNASE1L3	down	down	down	down	down	down	down	down	down	down		10
CAMK2N2	up	up	up		up	up	up	up	up	up	up	10
TERT	up	up	up	up	up	up	up	up	up	up		10
EN2	up	up	up	down		up	up	up	up	up	down	10
SVEP1	down	down	down	up	down	down	down	down	down		down	10
MELK	up	up	up	up	up	up	up	up	up	up		10
PKNOX2	down	down	down	down	down	down		down	down	down	down	10
PDZRN4	down		down	up	down	down	down	down	down	down	up	10
PCLAF	up	up	up	up	up	up	up	up	up	up		10
PLK1	up	up	up	up	up	up	up	up	up	up		10
B4GALNT2	up	up	up		down	down	up	up	up	down	down	10
TMEM145	up	up		up	up	up	up	up	up	up	up	10
SCARA5	down	down	down		down	down	down	down	down	down	down	10
RSPO1	down	down	down	down	down	down		down	down	down	up	10
CKAP2L	up	up	up	up	up	up	up	up	up	up		10
BUB1	up	up	up	up	up	up	up	up	up	up		10
FOS	down	down	down	down		down	down	down	down	down	down	10
CST1	up	up		up	up	up	up	up	up	up	up	10
HPSE2	down	down	down	down	down	down		down	down	down	up	10
UBE2C	up	up	up	up	up	up	up	up	up	up		10
PRIMA1	down	down		down	up	down	down	down	up	down	down	10
SOX11	up	up	up	up	up	up	up	up	up		up	10
TYMS	up	up	up		up	up	up	up	up	up	up	10
LRRN4CL	down	down	down	down	up		up	down	down	down	down	10
C5orf46	up	up	down		up	up	up	up	up	up	up	10
AURKB	up	up	up	up	up	up	up	up	up	up		10
EGR3	down	down	down	down		down	down	down	down	down	down	10
LBX2	up	up	up	down	up	up		up	up	up	up	10
TMEM132C	down	down	down		down	down	down	down	down	down	down	10
B4GALNT4	up	up	up	down	up	up	up	up	up	up		10
IQGAP3	up	up	up		up	up	up	up	up	up	up	10
KNTC1	up	up	up	up	up	up	up	up	up	up		10
CDCA2	up	up	up	up	up	up	up	up	up	up		10
KIF18B	up	up	up	up	up	up	up	up	up	up		10
ERCC6L	up	up	up	up	up	up	up	up	up	up		10
C1QL4	up		up	down	up	up	up	up	up	up	up	10
GABRD	up	up	up	up	up	up	up	up		up	up	10
ARHGAP11B	up	up	up	up	up	up	up	up	up	up		10
FAM111B	up	up		up	up	up	up	up	up	up	up	10
XRCC2	up	up	up	up	up	up	up	up	up	up		10
COL4A6	down	down	up	down	down	down	up		up	down	down	10
ARHGAP11A	up	up	up	up	up	up	up	up	up	up		10
PLPP4	up	up	up		down	down	down	up	up	up	up	10
PKHD1L1	down	down	down	down	down	down		down	down	down	down	10
VIT	down	down	down	down	down	down		down	up	down	down	10
MYZAP	down	down	down	up	down	down		down	down	down	down	10
UHRF1	up	up	up	up	up	up	up	up	up	up		10
RDM1	up	up	up		up	up	up	up	up	up	up	10
IL11		up	up	down	down	down	up	up	up	up	up	10
STRA6		up	up	down	down	down	up	up	up	up	up	10
CREG2		up	up	up	up	up	up	up	up	up	up	10
MMP12		up	up	up	up	up	up	up	up	up	up	10
HSPB6	down	down	down	down		down		down	down	down	down	9
PDK4	down	down	down	down		down	down	down	down	down		9
TMEM132A	up	up	up			up	up	up	up	up	up	9
SEMA3G	down	down	down	down	down	down	up	down	down			9
TACC3	up	up	up		up	up	up	up	up	up		9
MYOC	down	down	down	down		down		down	down	down	down	9
NFE2L3	up	up	up		up	up		up	up	up	up	9
RAD51	up	up	up		up	up	up	up	up	up		9
COL11A1	up	up	up		up		up	up	up	up	up	9
SPAG4	up	up		up	up	up	up	up	up	down		9
WISP2	down	down	down		up	up	down	down	down	down		9
PRR11	up	up	up		up	up	up	up	up	up		9
TRIP13	up	up	up		up	up	up	up	up	up		9
CDH19	down		down	up	down	down	down	down	down	down		9
SPAG5	up	up	up			down	up	up	up	up	down	9
ACACB	down	down	down			down	down	down	down	down	down	9
RAD54L	up	up	up		up	up	up	up	up	up		9
AURKA	up	up	up	up		up	up	up	up	up		9
DLL3	up	up	up		up	up	up	up	up	up		9
IL5RA	down		down	down	down	down	down	down	down		down	9
CDC6	up	up	up		up	up	up	up	up	up		9
TREM2	up		up	up	up	up	up		down	up	up	9
POLE2	up	up		up	up	up	up	up	up	up		9
CENPI	up	up	up		up	up	up	up	up	up		9
MSLN	up	up		down	up	up		up	down	up	up	9
IL4I1	up	up	up		up	up	up	up	up	up		9
CCNE1	up	up	up	up		up	up	up	up	up		9
CNFN	down	up	down			up	up	up	up	down	up	9
SYNGR4	up	up	up		up	up	up	up	up	up		9
SLC5A5	up	up	down		up		up	up	up	down	down	9
CPED1	down	down	down	down		down	down	down	down	down		9
CA9	up	up	up	down	up	up	up	up	up			9
PTGDS	down	down	down	down	down		up	down	down	down		9
DKK1	down	up	up	down			up	up	up	up	up	9
CCL2	down	down	down	down			down	down	down	down	down	9
DLX4	up	up			up	up	up	up	up	up	up	9
CYP27B1	up	up	up		down	down	up	up	up	up		9
RAD51AP1	up	up	up		up	up	up	up	up	up		9
BMP5	down	down	down		down	down	down		down	down	down	9
LIFR	down	down	down			down	down	down	down	down	down	9
TNNC1	up		down	down	down	down	up	down	down	up		9
REEP6	up	up	down	down	down	down		up	up	down		9
PROC	up	up	up	down	down			up	up	up	up	9
ATP6V1B1	up		down	up	down	down	up		up	up	up	9
ANGPTL1	down	down	down		down	down		down	down	down	down	9
SLC8A2	down	up	up	up		up		up	up	down	up	9
SPP1	up	up	up			up	up	up	up	up	up	9
DUSP1	down	down	down	down			down	down	down	down	down	9
LRAT	up		up	up	up	up	down	up	up	down		9
GJA3	up	up		down	down	down	up	up	up	up		9
SLITRK3	down	down	down	down	down	down	down			down	down	9
EGR2	down	down		down	down	down	down	down	down		down	9
NR4A1	down	down	down			down	down	down	down	down	down	9
HOXC13	up	up	up		up	up	up	up	up	up		9
COL10A1	up	up	up			down	up	up	up	up	up	9
GRM4	up	up	up		up		up	up	up	up	up	9
TMEM74B	up			up	up	up	up	down	down	up	up	9
SSX1	up	up	up		up		up	up	up	up	up	9
SIX1	up		down	up	up	up	up	up	up	up		9
AVPR2	down	down	down	down	down	down	up	down	down			9
MASP1	down	down			up	up	down	down	down	down	down	9
CHTF18	up	up	up		up	up	up	up	up	up		9
GAD1	up	up	up	up		down	up	up	up	up		9
FOXJ1	up	up	down	down	down		up		down	up	down	9
SULT4A1	up	up	up		up	up	up	up	up		up	9
MNX1	up	up	up		up	up	up	up	up	up		9
DUSP9	up		up	down	down	down	up	up	up	up		9
GINS2	up	up	up	up	up	up	up	up	up			9
RTBDN	up	up	up	up	up		up	up	up		up	9
MYH11	down	down	down	down		down		down	down	down	down	9
MYO18B	down	up	down	down	down	down	up	up	up			9
C1QTNF6	up	up	up		up	up	up	up	up	up		9
LYVE1	down	down	down			down	down	down	down	down	down	9
SAA2	up	down	down	up		up	down	up		up	up	9
CDCA8	up	up	up		up	up	up	up	up	up		9
RNFT2	up	up	up			up	up	up	up	up	up	9
EMX1	up	up	up		down	down	up	up	up	up		9
STAB2	down	down	down	up	up		down	down	down		down	9
IL6	down	down	down	down			down	down	down	down	down	9
SCN7A	down	down	down		down	down	down	down	down	down		9
GYPC	down	down	down	down	up	up		down	down	down		9
NUSAP1	up	up	up		up	up	up	up	up	up		9
ITPKA	up	up		up	up	up	up	up	up		up	9
TRIM54	up		down	down	up	up	up	up	up		up	9
CEP55	up	up	up		up	up	up	up	up	up		9
DNA2	up	up	up		up	up	up	up	up	up		9
MMRN1	down	down	down			down	down	down	down	down	down	9
PIF1	up	up	up		up	up	up	up	up	up		9
CYP1A1	up	down	down	up	down	down		down	down	down		9
FANCI	up	up	up		up	up	up	up	up	up		9
TICRR	up	up		up	up	up	up	up	up	up		9
P3H4	up	up	up	down		up	up	up	up	up		9
PNMT	up	up	down		down	down	up	down	down		up	9
TRPM2	up	up	up	up	up	up		up	up	up		9
RXRG	down	down	down			down	up	down	down	down	up	9
NUF2	up	up	up		up	up	up	up	up	up		9
DLX1	up	up	up	up	up	up	up	up	up			9
ABCA12	up	up			up	up	up	up	up	up	up	9
ANK2	down	down	down	down	down	down			down	down	down	9
CRHBP	down	down	down	down	down	down	down	down		down		9
SCUBE3	down	up	up	down		down	up	up	up		down	9
FAXC	down			up	down	up	up	up	up	down	up	9
MTFR2	up	up	up		up	up	up	up	up	up		9
IGFBP3	up		up		up	up	down	up	up	up	up	9
SYTL5	up		down		down	down	down	up	up	down	up	9
JPH2	down	down	down	up	up	up		down	down	down		9
HMGA2	up	up	up			up	up	up	up	up	up	9
FAM124A	down	down	down	down	down			down	down	down	down	9
GPM6A	down		down	down		down	down	down	down	down	down	9
NR3C2	down	down	down	up	down	down	down		down	down		9
CENPU	up	up		up	up	up	up	up	up	up		9
SPC25	up	up	up		up	up	up	up	up	up		9
ABCA9	down	down	down	down		down		down	down	down	down	9
PGM5	down	down	down		down	down		down	down	down	down	9
EME1	up	up	up		up	up	up	up	up	up		9
SLC24A2	up	up	up	up	down	down		up	up	up		9
ACAN	up	up	up	up	up		up	up		up	up	9
DRC1	up		down	down		up	up	down	down	up	down	9
SLC30A2	up	up	down		down	down	up	up		up	up	9
PTH1R	down	down		down	down	down	down	down	down	down		9
CCDC78	up	up		up	up	up	up	down	down	up		9
NTNG1	down	up		down	down	down		down	down	down	down	9
ATF3	down	down		down	down	down	down	down	down	down		9
FBXO41	up	up	up		up	up		up	up	up	up	9
LMOD1	down	down	down	down		down		down	down	down	down	9
PCOLCE2	down	down	down	down		down		down	down	down	down	9
MELTF	up			down	down	down	up	up	up	up	up	9
RANBP3L	down			down	down	down	down	down	down	down	down	9
ESM1	up	up	up	up	up		up		down	up	up	9
ENPP6	down	down		down	down	down	up	down		down	down	9
DCSTAMP	up		up	up	up	up		down	down	up	up	9
MAMDC2	down	down	down	down	down			down	down	down	down	9
VEGFD	down	down	down	down			up	down	down	down	down	9
SKA3	up	up		up	up	up	up	up	up	up		9
CMTM5	down	down	down	down		down		down	down	down	down	9
TMEM100	down	down	down	down	up			down	down	down	up	9
MFAP4	down	down	down			down	down	down	down	down	down	9
C15orf48	up	up	down		up	up	up	up	up		up	9
KLK4	up	up		up	up	up	up		up	up	down	9
RCOR2	up	up	up	up			up	up	up	up	up	9
PBK	up	up		up	up	up	up	up	up	up		9
HIST1H1E	up	up	up	down	down	down	up	up	up			9
FAM107A	down	down	down	down	down	down		down	down	down		9
RAB3B	up		up	up	down	up	up	up	up		up	9
GPRIN1	up	up	up		up	up	up	up	up		up	9
CST2	up	up	down		up	up	up	up		up	up	9
FRMD3	down	down	down	down		down	up	down	down		up	9
NEGR1	down	down		down		down	down	down	down	down	down	9
SYNPO2	down	down	down	down		down	down	down	down	down		9
C11orf86	up	up	up	down	up	down		up		down	up	9
NDNF	down	down	down	down	down	down		down	down		down	9
SPERT	up	up	up	down	down		up	up	up	up		9
EXO1	up	up	up		up	up	up	up	up	up		9
RMI2	up	up	up	up			up	up	up	up	up	9
DIRAS1	down		down	up	down		up	up	up	down	up	9
HASPIN	up	up	up		up	up	up	up	up	up		9
KCNJ10	up	up	up	down	down	down	down	up	up			9
ERFE	up	up	up			up	up	up	up	up	up	9
C2orf71	down	down	down	down	down	down		down	down	down		9
ITLN1	up	down	down	down	down	down	down	down	down			9
NRXN1	down	down	down	down	down		down	down		down	down	9
TH	up	up	up	down	down		down	up	up		up	9
MTURN	down	down	down	down	down	down		down	down	down		9
HIST3H2A	up	up		up	up	up	up	up	up		up	9
DDN	up	up		down	down	down	up	up	up	up		9
ODF3L1	down	down			up	up	down	down	down	down	down	9
RIPPLY3	up	up		down	down		up	up	up	up	up	9
CHST6	up	up	down	down	down	down	up	up			up	9
KLHL33	down	down	down	down	down	down		down	down		down	9
AHNAK2	down			up	up	up	up	up	up	down	up	9
PDIA2	up		up	down		up	up	up	up	down	up	9
PRAME	up	up	up		up	up	up	up	up	up		9
SLITRK2	down	down	down	down	up		down	down		down	down	9
FANCA	up	up	up	up	up	up		up	up	up		9
CFAP77	up	up	down	down	down	up		down	down		down	9
LRRK2	down		down	down		up	down	down	down	down	up	9
ALKAL2	down	down	down	down	up			down	down	down	up	9
KIAA0408	down	down	down		up	up		down	down	down	up	9
SH2D5	up	up	up		up	up	up	up	up	up		9
MMP1	up	up	up		up		up	up	up	up	up	9
HIST1H2AG	up	up	up	up	up	up	up	up	up			9
HIST3H2BB	up	up		up	up	up	up		up	up	up	9
HCAR1	up		down	up	down	down	up	up	up	up		9
DMBX1	up	up	up		up		up	up	up	up	up	9
CFD	down	down	down	down	up			down	down	down	down	9
PRC1	up	up	up	up	up		up	up	up	up		9
CSAG1	up	up	up	up	up		up	up	up	up		9
FCGR3A	up	up	up	up	up	up		down	down	up		9
DISP3	up	up	up	up	up		up	up	up		up	9
IGFL2	up	up	up		up	up		up	up	up	up	9
MT1M	down	down	down	down			down	down	down	down	down	9
FAM72D	up	up	up		up	up	up	up	up	up		9
C10orf55	up		up	down	down	down	up	up	up		up	9
ERVMER34-1	up		up	down	down	down	up	up	up	up		9
KIFC1	up	up	up		up	up	up	up	up	up		9
INMT	down	down	down	down			down	down	down	down	up	9
AC083902.2	down	up	down	down	down	down	up	up	up			9
C19orf84	up	up	up	up	up	up			up	up	up	9
LCN6	down	down	down	down		down		down	down	down	up	9
HIST1H3G	up	up	up	up	up	up	up	up	up			9
CCL23	down	down	down	down	down	down	down	down	down			9
HIST1H2AE	up	up	up	up	up	up	up	up	up			9
NEFL	up	up	up			up	up	up	up	down	up	9
AC007906.2	down	down	down	down	down		down	down	down		up	9
HIST1H2AM	up	up	up	up	up		up	up	up	up		9
HIST1H3H	up	up	up	up	up	up	up	up	up			9
C6		down	down	up	up	up	down	down	down		down	9
TRPM5		up		down	down	down	up	up	up	up	down	9
CFAP61		up	down	down	down		up	down	down	up	down	9
CHGB		up	up		down	down	up	up	up	down	up	9
TBX15		down	down	up	up	up	down	up	up	up		9
SYNDIG1		up	up	down		down	up	up	up	up	down	9
HAGHL		up	up	up	up	up	up	up		up	up	9
TYRP1		up	down	down	down	down	up	down	down	up		9
PNCK		up	up	up	up	up	up	up	up	down		9
ADAMTS14		up	up		up	up	up	up	up	up	up	9
EGF		down	down	down	down	down	up	up	up	up		9
SLC5A2		up	up	down	down	down	up		down	up	up	9
PADI1		up	down		up	up	up	up	up	down	up	9
ETNK2		up	down	down	down	down		up	up	down	up	9
SLC5A12		up	up	down	down	down		up	up	down	up	9
AKR1C2		down	up	down		up	up	up	up	down	down	9
CTHRC1		up	up		up	up	up	up	up	up	up	9
GPR182		down		down	down	down	down	down	down	down	down	9
GPD1		down	down	down	down	down	down	down	down	down		9
SAA1		down	down		up	up	down	up	up	up	up	9
LPL		down	down	down	down	down	up	down	down		up	9
ZNF781		down	down	down		down	up	down	down	down	down	9
SAA2-SAA4		down	down		up	up	down	up	up	up	up	9
GABRP			down	down	down	down	down	up	up	up	up	9
ZMYND10	up	up	down	down		up	up	down	down			8
CEACAM7	down	up	down	up	down		up	up	up			8
SELE	down	down	down	down	down	down		down	down			8
E2F2	up	up		up	up	up	up	up	up			8
IYD	up	up	down		down	down	down	up	down			8
SYT7	up	up		up	down	down		up	up	up		8
ATP1A2	down	down	down	down		down		down	down	down		8
HSD17B6	down	up	up	down			down	down	down	down		8
HMGB3	up	up	up	up		up		up	up	up		8
DEPDC1B	up	up	up				up	up	up	up	up	8
MYOM2	down	down	down	down		down	down	down		down		8
OTC	down	down	down	up				down	down	down	down	8
ZIC2	up	up	up		up		up	up	up	up		8
MAGEC2	up	up	up			up	up	up	up	up		8
LMO3	down	down	down		down	down			down	down	up	8
ENTPD2	up			up	up	up	up	up	up		up	8
KCNH2	down	up		up		up	up	up	up	down		8
LAMC2	up	down	up	down	down				up	up	up	8
RASGRF1	up	up	up	down			up	down	down		up	8
CDH3	up		up		down	down		up	up	up	up	8
FGF10	down		down		down	down		down	down	down	down	8
CACNG4	up	up		down		down	up		down	up	up	8
WDR62	up	up		up	up		up	up	up	up		8
NMRK2	down	down	down	up		up		down	down	down		8
UBE2T	up	up	up			up	up	up	up	up		8
SPAG6	up	up	down	down		up	up	down	down			8
ACTN2	down	up	down		up		up	down	down	down		8
ADCYAP1R1	down	down	down	up	up			down	down	down		8
CXCL2	down	down	down	down	up		down	down	down			8
ARG2	down			down	down	down	up	up	up	down		8
EPYC	up	up	up		up			up	up	up	up	8
DNMT3B	up	up	up			up	up	up	up	up		8
SLC4A11	up			down	down	down	up	up	up	up		8
FMO2	down	down	down	down				down	down	down	down	8
CYP26A1	up			up	up		down	up	up	up	up	8
MAGEB2	up	up	up		up		up	up	up	up		8
PALM	down	down	down	down	down	down				down	up	8
CENPM	up	up		up	up	up	up	up	up			8
COCH	up		up	up	down		up	up	up	up		8
SIX4	up	up		up	down		up	up	up	up		8
PABPC1L	up		up		up	up	up	up	up	up		8
NKAIN4	up	up	up	down				up	up	up	up	8
TRIB3	up	up		up	up	up		up	up	up		8
FERMT1	up		up		down		up	up	up	up	down	8
CST4	up	up	down			up	up	up	up	up		8
PCSK1N	up	up		down	down		up	up	up		up	8
RASL12	down	down	down		up		up	down	down	down		8
CA2	up		up	up	down		down	down		down	up	8
TRPA1	down	up	up	down	up	up		up	up			8
CALB1	up		up	down	down	down		up	up	up		8
SFRP1	down	down	down	down	down	down	down			down		8
LHB	up		up	up		up		up	up	up	up	8
GRIN2D	up	up	up		up	up		up	up	up		8
CAV1	down	down	up	up	up			down	down	down		8
EZH2	up	up			up	up	up	up	up	up		8
MEST	up	down	up	down	down			up	up	up		8
PRUNE2	down	down	down	down	up	up			down	down		8
OGN	down	down	down	down				down	down	down	down	8
NEURL1	down	up	down	up		down		up	up		up	8
UBE2S	up	up	up	up			up	up	up	up		8
RUNDC3A	up	up	up	up		up	up	up	up			8
CSF3	down	down		down		down	down	down	down		down	8
ASPA	down	down	down	down			down	down	down	down		8
RASD1	down	down	down	down	down	down	down	up				8
SGCA	down	down	down			down	down	down	down	down		8
SOD3	down	down	down	down	down				down	down	down	8
MDK	up	up			up	up	up	up	up		up	8
RERGL	down	down	down	down	down	down				down	down	8
CDCA3	up	up	up		up	up	up	up	up			8
FAM184A	down	down	down	down	down	down		down	down			8
KHDRBS2	down		down	down	down	down		down	down		down	8
EPM2A	down	down	down		down	down	down	down		down		8
COL7A1	up		up	down			up	up	up	up	up	8
CCL20	up	up		down	up		up	up		up	up	8
OTX1	up	up				up	up	up	up	up	up	8
IL1RL1	down		up	down	down	down	down	down	down			8
KMO	up	up	up	down		down	down	down	down			8
MFAP2	up	up	up				up	up	up	up	up	8
ACTL8	up	up	up		up	up	up	up		up		8
TREH	down	down	down	down	down	down			down	down		8
CASQ2	down	down	down	down		down		down	down	down		8
ONECUT2	up	up	up	up		up		up	up	up		8
TEK	down	down		down	down	down	down	down	down			8
SMAD9	down	down	down	down				down	down	down	down	8
ADRA1A	down	down	down	down			down	down	down	down		8
TBX4	down		up		up	up	up	down	down	up		8
PDZRN3	down	down	down	down	down			down	down	down		8
KIF18A	up	up	up		up		up	up	up	up		8
XPNPEP2	down	down	down	down	down	down			down	down		8
LDB3	down	down	down	down		down		down	down	down		8
DNAI1	up	up	down	down		up		down	down	up		8
NECAB1	down	down		down			up	down	down	down	down	8
HOXC11	up	up	up	down		up		up	up	up		8
PLP1	down	down	down		down	down	down	down		down		8
SLC12A5	up	up	up	up	up	up	up				up	8
APOBEC2	down		down	down			up	up	down	down	up	8
TREM1	up	up	up		up	up			down	up	up	8
C17orf53	up		up		up	up	up	up	up	up		8
PCSK2	down	up	down		down		down	up		down	up	8
BPIFB1	up	up	down	up	up		up		down		up	8
F10	down	down	down			up		down	down	down	down	8
PROZ	up	up			down	down	down		up	up	down	8
WNK4	up	up	down	down	down	down	up		up			8
PLA2G5	down	down		up	up			down	down	down	up	8
ZFP36	down	down	down	down			down	down	down	down		8
E2F8	up	up		up	up	up	up	up	up			8
CDO1	down	down	down	down	down			down	down	down		8
PLPPR3	up	up			up	up		down	down	up	up	8
KCNA5	down	down	down	down		down		down	down	down		8
CNN1	down	down	down	down		down		down	down	down		8
TNNI2	up		down		up	up	up	down	down	up		8
ULBP2	up	up	up			up	up		up	up	up	8
SYNE1	down	down		down		down	down	down	down		down	8
PRR7	up	up			up	up	up	up	up	up		8
AOC3	down	down	down	down		down		down	down	down		8
MATN3	up	up	up				up	down	down	up	up	8
RHBG	up	up	down	up		down	up	up	up			8
DMGDH	down	down	down	down		down	down	up		down		8
SPINK5	up		down	up	up		up	up	up	down		8
DUSP26	down		down	down	down	down		down	down	down		8
TCN1	up		down		up	up		up	up	down	up	8
ADAMTS8	down	down	down	down	down			down	down	down		8
KCP	up			down		up	up	up	up	up	up	8
RDH5	down	down		down	up	up	down			down	up	8
PPP1R1A	down	down	down	down	down	down	down			down		8
FAIM2	down	up	down	down	down	down			down	down		8
DGKB	down	down	down	down	down	down			up	down		8
CTSV	up		up	down	down	down	up	up	up			8
LMX1B	up			down	down	down	up	up	up	up		8
ARHGEF39	up	up	up		up	up	up	up	up			8
GGH	up	up		down	down	down		up	up	up		8
UNC13C	up	down	down		down	down			up	down	down	8
DNASE2B	up		down	up	up	up		down	down	up		8
CGREF1	up	up		down	up	up	up	up	up			8
CYP2C9	up		down	down		up	down	up	up	down		8
MTTP	down		down	down	down	down	down			down	down	8
COL2A1	up	up	up	up			up	up	up		up	8
GPR84	up	up	up		up	up		up		up	up	8
BRCA2	up	up	up		up	up	up		up	up		8
ZIC5	up	up	up		up		up	up	up	up		8
CDH24	up		up		up		up	up	up	up	up	8
FBLN5	down	down		down	down	down		down	down		down	8
CYP1A2	up	down	down	up		down	down	down	down			8
MYOCD	down	down	down	down		down		down	down	down		8
ABCA8	down	down	down		down		down	down	down	down		8
MAPK4	down		down		down	down		down	down	down	down	8
CFAP74	up			up	up	up		down	down	up	up	8
MYOM3	up		down	down			up	up	up	up	up	8
CYR61	down	down		down		down	down	down	down		down	8
NECTIN4	up	up		down	down	down		up	up		up	8
LHX9	up	up	up	up	up	up			down	up		8
PPFIA4	up	up	down	down	up		up	up	up			8
CNGA3	down	up	down	down	down			up		down	up	8
CDCA7	up	up			up	up	up	up	up	up		8
CCDC150	up	up	up	down	up			up	up	up		8
CSRNP1	down	down	down			down	down	down	down	down		8
AGTR1	down		down	down		down	down	down	down	down		8
HAPLN1	up	up	up		up		up		up	down	up	8
HMGCLL1	down		down	down			down	down	down	down	down	8
LGSN	up	up		down	down	down		up	up	up		8
RSPO3	down	down	down		down	down	down		down		down	8
TMEM47	down	down	down	down			down	down	down	down		8
CHRNA6	up	up	up		up	up		up	up	up		8
ATP6V0D2	up		up	up		down	up	down	down	up		8
SLC25A25	down	down	down		down	down		down	down		down	8
HMCN2	down	down	down	down		down		down	down		down	8
SAA4	up	down	down		up	up	down	up		up		8
SCN2B	down	down	down		down	down		down	down	down		8
CNTN5	up	up	up	down	down	down			up		down	8
DLG2	down	down	down	up		down	down			down	down	8
ZNF385D	down		down	down	down	down	up		down	down		8
TDO2	up	up	up	up	up		down	up			up	8
HSPB8	down		down		up	up	up	down	down	down		8
DMP1	up	up	up		up			up	up	up	up	8
LPCAT1	up	up	up		up	up	up		down	up		8
PLEKHG4B	up		up	down	down		up	up	up		down	8
PID1	down	down		down		down		down	down	down	down	8
ANKRD29	down	down		up		up	up	down	down		down	8
ABI3BP	down	down	down	down				down	down	down	down	8
ANGPT1	down	down	down	up		down		down	down	down		8
ENPP3	down		down	down	up	up		up		down	up	8
JAM2	down	down	down	down		down		down	down	down		8
ADAMTS1	down	down	down	down			down	down	down	down		8
WNT7A	up		up	down	down		down	down	down		up	8
RAET1L	up	up		down	down			up	up	down	up	8
ATAD2	up	up	up	up			up	up	up	up		8
RCAN1	down	down		down		down	down	down	down		down	8
IGF2BP1	up	up	up	down			up	up	up	up		8
SIM2	up	up	down	down	down	down		up	up			8
SCUBE1	down		down		down	down	up	down	down	down		8
BTG2	down		down	down	down	down		down	down	down		8
TFF2	up			down	up	down		up	up	down	down	8
PAQR6	up	up			up	up	up	up	up		up	8
LY6K	up		up		down	down	up	up	up		down	8
LY6E	up	up	up	down	up		down			up	up	8
FOXH1	up	up	up		up	up		up	up	up		8
CELF5	up			up	up	up	up	up	up		up	8
CD300LG	down	down	down			down		down	down	down	down	8
AKR7A3	up	up		down	down		down	up	up	down		8
TDRD5	up		up		down	down	up	up	up	up		8
KIF26B	up	up	up		down		up	up	up	up		8
PKDCC	down	down		up		up	up		down	up	down	8
ACTG2	down	down	down		up		up	down	down	down		8
CCDC141	down	down	down		up		down	down	down		down	8
AIM2	up	up	up		up	up		up	up		down	8
ALB	up		up	down	down	down	down	up		up		8
MAD2L1	up	up	up	up			up	up	up	up		8
SLC45A2	up	up			up	up	up		up	up	up	8
IL31RA	up		up		up	up	up	up	up		up	8
RAET1E	down		down	down	down	down	up			down	up	8
PTTG1	up	up		up	up	up	up	up	up			8
SOX17	down	down	down	down		down		down	down	down		8
DLC1	down	down		down		down	down	down	down	down		8
CFAP47	up	up	down	down			up	down		up	down	8
C9orf84	up		up	up	down	down	up	up	up			8
CFL2	down	down	down	up			down	down	down	down		8
WDR72	up	up			down	down		up	up	up	down	8
SCNN1G	up		down	down	down	down		down	down	down		8
CCDC178	down	down	down		down	down		down	down	down		8
TMEM92	up	up	up		up	up		up		down	up	8
JSRP1	up	up	down		up	up		up	up	down		8
RHEBL1	up	up	up		up	up	up		up	up		8
KIFC2	up	up		up	up	up	up	up	up			8
PHYHIP	down	down	down	down	down				down	down	up	8
CAVIN2	down	down	down	down				down	down	down	down	8
KCNK9	up	up	up		up		up	up	up	up		8
BNC1	up	down	up			up	down		up	down	up	8
CHRNA5	up			up	up	up	up	up	up	up		8
NLGN1	down	down		down	up	up	up			down	down	8
ZPLD1	up	up	up			up	up	up	up		up	8
FABP6	up	up		up	up	up	up			up	up	8
HSPB2	down	down	down		up	up		down	down	down		8
HOXB9	up	up	up		down		up	up	up	up		8
ESCO2	up	up	up		up	up	up	up	up			8
APLN	up		up		up		up	down	down	up	up	8
KRT20	up	up			up	up	up	up	up	down		8
ANGPTL7	down	down	down	down	down			down	down	down		8
RRM2	up	up			up	up	up	up	up	up		8
LRRC15	up	up	up	up				up	up	up	down	8
MYOZ2	down	down	down	down	down	down			down	down		8
SYT12	up		up	down	up	up		up	up		up	8
HSPB7	down	down	down		down	down		down	down	down		8
CBX2	up	up	up				up	up	up	up	up	8
SELP	down	down		down	down	down	down	down	down			8
ADGRE1	up		up	up	up	up	down	down	down			8
CADM2	down	down	down	down	down				down	down	down	8
CCNE2	up	up			up	up	up	up	up	up		8
JUN	down	down		down			down	down	down	down	down	8
APOBEC3B	up	up	up				up	up	up	up	down	8
C1orf194	down	up	down	down		up		down	down		down	8
HOXC10	up	up	up				up	up	up	up	up	8
GREM2	down	down	down	down	down	down			down	down		8
TMEM252	down	down	down	down		up		down	down	down		8
SYNM	down	down	down	up	up			down	down	down		8
CACNB4	down		down	up	down	down	up	down	down			8
CAPN12	up			down	up	up	up	up	up	up		8
RNASE10	up	up	up		up			up	up	up	up	8
C2orf82	up				up	up	up	up	up	up	up	8
PYCR1	up	up		up	up	up	up	up	up			8
NEB	up		down	down		down	up	up	up	up		8
GPR19	up	up	up		up		up	up	up	up		8
PRR36	up	up			down	up	up	up		up	up	8
ACSM5	down	down	down	down			down	down	down	down		8
BMP8A	up	up	up		up			up	up	up	down	8
PCDH9	down	down			down	down	down	down	down	down		8
SLIT3	down	down	down	down		down		down	down	down		8
MAP7D2	up		up	down	up		up	up	up		up	8
PROS1	down	down		down	up		down	down	down		up	8
CEND1	down	up	up	up			up	up	up	down		8
SRL	down	down	down	down	down			down	down		up	8
KCNQ5	down	up		up	up	up		up	up	down		8
LEMD1	up		up	down		up		up	up	up	up	8
FOXD2	up	up	up	down			up	up		up	up	8
PDE2A	down	down		down		down	down	down	down	down		8
FOXE3	up		up	down	down	down		up	up	up		8
TMEM220	down	down	down				down	down	down	down	down	8
LCN10	down	down	down	up		down			down	down	up	8
IGFL1	up	up		down		down		up	up	down	up	8
IER5L	up	up	up	down				up	up	up	up	8
HBA2	down	down	down				down	down	down	down	down	8
FAM72B	up	up	up		up		up	up	up	up		8
PRELP	down	down	down	down			down	down	down	down		8
SHISA6	down		down	down	down	down	up		up		up	8
HMX2	up	up	up	down	down	down		up	up			8
ENTPD8	up	up	down	down	down			up	up		up	8
RELN	down	down	down	down	down	up				down	down	8
PLEKHG4	up			down	up		up	up	up	up	up	8
CTSE	up	up	up	down	up	up			down	down		8
CPNE4	up		down	down	down	up		up	up		up	8
C20orf204	up	up	up		up		up	up	up	up		8
FAM72A	up	up	up		up		up	up	up	up		8
FAM180B	down	down	down		down			down	down	down	down	8
COL27A1	up		up	down	up	up			up	up	down	8
HIST1H2AI	up	up	up	up	up		up	up	up			8
MAGEA6	up	up	up		up		up	up	up	up		8
IL27	up	up	up	up	up			down	down	up		8
BLM	up	up			up	up	up	up	up	up		8
ZNF695	up	up	up				up	up	up	up	up	8
SLC28A3	up	down	up			up		up	up	up	up	8
ELOVL2	down	up	up	up	up	up		up	up			8
DLGAP2	down	down	down	down	down	down	down				down	8
CACNA1E	up	up		down		down	up	up	up	up		8
PEG3	down		down		down	down	up	down		down	down	8
SLC34A3	up	up	down	down	down	down	up	up				8
ARC	down			down	down	down		down	down	down	down	8
ABCA4	up		up	down	down	down		up	up	down		8
TEX45	up	up		up		up	up	up	up	up		8
TCEAL6	down	down	down	down	down	down				down	down	8
MSH5	up		up		up	up	up	up	up	up		8
PSORS1C2	up	up	down		up	up		up	up		up	8
PRSS1	up	up	down	up			up	up	up		up	8
MT1H	up	up		down	down	down	down	up	up			8
C15orf59	down	up	down	up		down	up	down		down		8
CPT1B	up			up	up	up	up	up	up	up		8
PRSS50	up		up		up	up	up	up	up		up	8
DIO1	up	up	down	down	down	down			down		down	8
TRIM59	up	up	up		up		up	up	up	up		8
UBD	up	up			up		up	up	up	up	down	8
FER1L6	up	up	down		down	down	up		up		down	8
EBF2	down	down	down	up	up	down	up		down			8
MAGEA3	up	up	up		up		up	up	up	up		8
TINCR	up	up		down	down			down	up	down	up	8
SAPCD1	up		up		up	up	up	up	up	up		8
C19orf81	up	up	up	up		up	up		up	up		8
CD302	down	down	down	down		down	down	down	down			8
AKAP2	down	down		up		down		down	down	down	down	8
STRC	up			up	up	up	up	up	up	up		8
C4orf48	up	up	up			up	up	up		up	up	8
HBB	down	down	down				down	down	down	down	down	8
FOXD1	up	up	up	up			up	up	up	up		8
MEX3A	up	up				up	up	up	up	up	up	8
AL096711.2	down	down			up	up		down	down	down	up	8
TMEM249	up	up	up	up			up	up	up	up		8
FAM72C	up	up	up		up		up	up	up	up		8
GDF10	down	down	down				up	down	down	down	down	8
GABRQ	up	up		down	up		up	up	up		up	8
ERVV-2	up	up	up	down		up		up		up	up	8
ERVV-1	up	up	up	down				up	up	up	up	8
LHX1	up	up	up		down	down		up	up	up		8
HIST1H2BE	up	up	up	down	up		up	up	up			8
HIST1H2BO	up	up	up		up		up	up	up	up		8
CCL18	up			up	up	up		down	down	up	up	8
HIST1H2BH	up	up	up		up	up		up	up	up		8
PRSS2	up	up		up	up		up	up	up		up	8
CCL14	down	down	down			down	down	down	down	down		8
DACH1	down		down	down	down	down	down	down	down			8
GPIHBP1	down	down	down	down		down		down	down	down		8
VCAN		up	up		up	up	up	up		up	up	8
ADRB1		down	down	up	down	down	down	down	down			8
SYT1		up	up	down	down	down		up	up		up	8
MYO3B		up	up	down	down	down		up	up		up	8
LAMP3		up	up	up	up			down	down	up	up	8
CEACAM6		up	down			up	down	up	down	up	up	8
PPEF1		up	up		up		up	up	up	up	up	8
CPA1		down		down	down	down	up	down	down	down		8
CLEC4M		down		down	down	down	down	down	down		down	8
MET		down	up	up	up	up		up		up	up	8
SLC6A4		up	down	up	down	down		down	down	down		8
COL1A1		up	up		up		up	up	up	up	up	8
CLIC5		down	down	down	down	down	up	down	down			8
RBP2		up		down	down	down	up	down	down	down		8
DNAH6		down	down	down			down	down	down	up	down	8
TPO		down	down		up	up		up	up	down	down	8
PCDH17		up	up	up	up		up	down	down		up	8
TEX11		up	up	down	up	up	up	up	up			8
PCK1		down	down	down	down	down	down	up		down		8
KIRREL2		up	up	down	down	down	up	up	up			8
MGAT3		down		down	up	down	up	down	down		up	8
KRT17		down	up			up	up	up	up	up	up	8
SLC7A10		down	down	down		down	up	up	up	up		8
KL		down		down	down	down		down	down	down	up	8
ADAMDEC1		up	up	up	up	up	up	up	up			8
FKBP10		up	up		up	up	up	up	up	up		8
SUSD4		up		down	down	down	up		up	down	up	8
HHIPL2		up	up		up	up	up	up	up	up		8
TRPM8		up			up	up	down	up	up	up	up	8
DCDC2		down	down	down	down		up	down	down	up		8
VIP		down	down	down	up	down		down	down	down		8
GSDMC		up		up	up	up	up	up	up	down		8
ADAM12		up	up		up		up	up	up	up	up	8
SLC7A11		up	up	up	up	up	up	up	up			8
ADGRF4		up		down	up	up	up	up	up		up	8
WIF1		down		down	down		up	down	down	down	up	8
FBXO43		up	up		up	up	up	up	up	up		8
DGKI		down	up	up		down	up	up	up		down	8
CLDN14		up	up	down	down	down		up		up	up	8
NPHS1		up	up	down	down	down	up	up			down	8
SIGLEC11		down		down		down	down	down	down	down	down	8
ZG16B		up	down	up	up	up	up	up	up			8
SLC1A7		down	down		up		up	up	down	down	down	8
AXDND1		up	up	down	down	down	up		up	down		8
BNIPL		up	down	down	down	down	up			down	up	8
UCN		up	up		up	up	up	up		up	up	8
FBP1		up		down	down	down	down	down	down	down		8
ARMC3		up	down	down		up		down	down	up	down	8
GLYATL1		up	down	down	down	down	down	up	up			8
CA4		down	down	down	down	down	up	down	down			8
GDNF		up	up	down	down	down		up	up		up	8
PLA2G4F		up		up	down	down	up	down	down		down	8
MUC15		down	down	down	down	down	up		down	down		8
CLIC3		up	down		up	up	up	down	down	down		8
OSCAR		up	up		up	up		down	down	up	up	8
SOSTDC1		down		down	down	up	up	down		down	down	8
KRT15		down		down	up	up		up	up	down	up	8
RXFP1		up	up	down		down	down	down	down		down	8
AQP4		down	down	down	down	down		down	down	down		8
C2orf54		up	down	down	down	down			down	down	up	8
ASPHD1		up			up	up	up	up	up	up	up	8
ISX		up		down	down	down	up	up	up	up		8
RIMS2		up	up	up		up	up	up	up		up	8
CPNE7		up	up		up	up	up	up	up	up		8
HTR1D		up	up	down		up	up	up	up		up	8
CFAP65		up	down	down		up	up	down	down	up		8
PLCXD3		down	down	up	down	down	down		down	down		8
MCEMP1		up	up		up	up		down	down	up	up	8
CCBE1		down		up	down	down	down	down	down		down	8
WT1		up	up	down	down	down	up			up	up	8
NAT8L		down	down		down	down	up	up	up		up	8
CD300LF		up	up	up	up	up		down	down	up		8
FAM183A		up	down	down	up	up	up	down	down			8
PLEKHN1		up	down		up	up	up	up	up		up	8
PERM1		up	down		up	up	up	up	up		up	8
P2RX2		up	down		down		up	down	down	down	down	8
RUFY4		up	up		up	up	up	up	up	up		8
SPTSSB		up	down	down	down		up	up	up	down		8
C6orf141		up	up	down	up	up		up	up		down	8
CYP2B6		up	down	down	down	down	down	up		up		8
ADAMTSL2		up	up	down	down	down	down		down	up		8
CNGA1		down	down		down	down	down	up	up	down		8
LRRC10B		up	down	down		down	up	down	down	down		8
GPX3		down	down	down	down	down		down	down	down		8
CERS1		up		up	up	up	up	up	up		up	8
ADH1C		down			down	down	down	up	up	down	down	8
CDH10			down	down	down	down	up	down	down	down		8
SLC9A3			down	down	down	down	up	up	up	down		8
NOX4			up		down	down	up	up	up	up	up	8
ISM2			up	up	down	down	up	up	up	up		8
HOXA13			up	up	up	up	up	up	up	up		8
KRT23			down	down	down	up	up	up	up	up		8
SLPI			down	down	down	up		down	down	down	up	8
HOXD10			up	down	down	down	up		up	up	up	8
RHCG			down	up	down	down		up	up	down	up	8
SH3GL3			down	down	down	down	up	down	down	down		8
SLC2A5			down	down	up	down	up	up	up	down		8
GOLGA7B			up	up	up	up	up	up	up		up	8
SLC5A11			up	down	down	down	up	up	up	down		8
COX6B2			up	down		up	up	up	up	up	up	8
KLHDC8A			down		up	down	up	up	up	down	up	8
MOGAT2			down	down	down	down	down	up	up	down		8
CHRM1			down	up	down	down		down	down	down	down	8
MFSD4A			down	down	down	down		up	down	down	up	8
ATP2A1			down	up	up	up	up	up	up	up		8
RFX8			up	up	up		up	up	up	up	up	8
CAPN8			down	down	down	down	up	up	down		up	8
FLRT1				down	down	down	up	up	up	down	down	8
CYP17A1				down	down	down	up	down	down	up	down	8
CHODL				down	down	down	up	up	up	down	down	8
AOC1	up	up		down			down	up	up		up	7
DBNDD1	up	up	down			up	up	up	up			7
ARX	up	up	down		up	up		up			up	7
PRKAR2B	down	down	down	down	down		down			down		7
DLX6	up		up		up		up	up	up	up		7
DPF1	up	up	up				up	up	up	up		7
BRCA1	up	up	up			up		up	up	up		7
DDX11	up				up	up	up	up	up	up		7
CNTN1	down		up	down	down	down			up	down		7
SYT13	up	up		up			up	up	up	up		7
SLC7A9	up			down	down	down		up	up	down		7
KCNG1	up	up		up		down	up	up	up			7
USP2	down		down		down	down		down	down	down		7
HOXC8	up		up	down			up	up	up	up		7
RTN4R	up	up	up	up		up			up		up	7
GPM6B	down	down		down	down			down	down	down		7
ARHGAP6	down	down	down	up				down	down		down	7
PTPRN	up		up		up	up		up	up	down		7
ARSF	down		down	down		down		down		down	up	7
MYLK	down	down		down		down		down	down	down		7
MPPED2	down				down	down	up		up	down	down	7
CLDN18	up	down	up	down			up	down	down			7
RASGRP2	down			down	up			down	down	down	down	7
ABCC9	down	down	down	down			down		down	down		7
LIMS2	down	down		down		down		down	down	down		7
MCM2	up	up	up				up	up	up	up		7
IGF2BP2	up		up			up	up		up	up	up	7
FRY	down		down	down	down	down		down	down			7
CDHR2	up	up	up	down			down	up		down		7
ATP12A	up		down	down	down	down				down	up	7
MCAM	down	down			up		up		down	down	up	7
PPP1R12B	down	down	down	up		down			down	down		7
FBLN1	down			down	down		up	down		down	down	7
ADCY2	down		down	down	up	up			up	down		7
ITM2A	down	down	down			down		down	down	down		7
BPIFB2	up	up	down	up			up	up		down		7
TNS1	down	down	down			down		down	down	down		7
PGR	down		down	up		down		down	down	down		7
IGSF9	up	up			down	down		up	up		up	7
ORC1	up	up	up				up	up	up	up		7
TMPRSS11E	down		down	up				up	up	down	up	7
PTHLH	up		up	up	up		up	up	up			7
SMPX	down		down	up			up	up	up	down		7
TPSD1	down				up	up		down	down	down	up	7
CDC7	up	up				up	up	up	up	up		7
HCN2	up	up		up			up	up	up		up	7
GADD45B	down		down			down	down	down	down	down		7
CBX7	down	down	down			down		down	down	down		7
CABP7	up	up	up				up	up	up	down		7
CACNA1I	up	up		up	up		up	up	up			7
CTSG	down	down	down					down	down	down	up	7
VSX1	down			up	up	up	up	up	up			7
GINS1	up	up	up				up	up	up	up		7
SLC17A9	up	up	up		up	up		up		up		7
SPEF1	up	up		down		up	up	down	down			7
RSPO4	up				up	up		down	down	up	up	7
PPP1R16B	down	down		down		down		down	down		down	7
MYOM1	down	down	down	down		down			down	down		7
SRPX	down	down					down	down	down	down	down	7
SGCG	down	down	down		down			down	down	down		7
CEMIP	up	up					up	up	up	up	up	7
TGM5	down		down	down	up			up	up	down		7
EYA1	down		down	down	up		up		up		down	7
MCM4	up	up	up				up	up	up	up		7
DHDH	up	up		down		down	up			down	up	7
CKM	down		down	down	down	down		up		down		7
BBC3	up	up		up	up	up				up	up	7
ICAM5	up		up	up			up		down	up	up	7
ATP1A3	up	up	down	up	up	up		up				7
CCDC114	up	up	down	up			up	down	down			7
DLX5	up	up			up		up	up	up		up	7
ATP6V0A4	up		down	up	down	down		up			up	7
TFR2	up	up	up		up	up		up	up			7
MEOX2	down	down	down		up		up		down		down	7
LHX2	up	up				up	down	up	up	up		7
TLX1	up	up	down				up	up	up	up		7
HLF	down	down	down					down	down	down	down	7
HGFAC	up	up		down		up	down	up	up			7
FAM149A	down	down	down	down			down		down	down		7
PPARGC1A	down	down	down	up	down				down		down	7
CRYAB	down	down	down			up		down		down	down	7
ZBTB16	down	down	down					down	down	down	down	7
VWF	down	down		up	up		up	down	down			7
TNS2	down	down	down			down		down	down	down		7
SLC6A12	up		up	down	down		down	down	down			7
KCNA1	down	down		down	down	down				down	down	7
ADGRD1	down	down	down	down	down			down	down			7
IFNG	up	up	up		up	up		up		up		7
GYS2	down	down	down			up	down			down	down	7
NCOA7	down	down	down		down	down	down		down			7
RBM24	down	up	down	down			up			down	down	7
FHL5	down	down	down	down		down		down	down			7
SIM1	up	down	down		down	down	up	up				7
SOBP	down	down	down	down				down	down	down		7
NR2E1	up		up		up			up	up	up	up	7
WISP3	up		up	down			down	up	up	up		7
LAMA4	down	down		up	up	up	up		down			7
GHR	down	down				down	down	down		down	down	7
HAVCR1	up			down	up	up	up	up		up		7
LMNB1	up	up			up		up	up	up	up		7
C9	up		up	up		down	down		up	up		7
KNG1	up			down	down	down		up		up	up	7
BCHE	down		up	down		up	down	down		down		7
LRRC31	up	up	down	up		up		up	down			7
ECT2	up	up	up				up	up	up	up		7
PLSCR4	down	down		down			down	down	down		down	7
ARHGEF26	down				down	down	down	down	down	down		7
GRB14	up	up	down	up	down	down		up				7
TACR1	down	down	down	down	down	down	up					7
EFEMP1	down	down		down		down		down	down		down	7
REG1A	up		up	down	up		up	up	up			7
GNLY	up		up	up	up	up			down		up	7
DLX2	up	up	up		up		up	up	up			7
PLCL1	down		down		down	down		down	down	down		7
TPSG1	down	up		down	up		up		down	down		7
LEPR	down	down	down	down				down	down	down		7
AGMAT	up	up		down	down	down		up	up			7
ST6GALNAC5	down			down		up	up	down	down		up	7
PROX1	down	down		down	down	down				up	down	7
APOA1	up	up		down			down	down	down	down		7
TTR	up		down	up		down	down	up			up	7
FILIP1	down	down	down		up			down	down	down		7
CTGF	down			down	down	down		down	down		down	7
SLC16A7	down	down	down	up	down	down				down		7
PPL	down	down	down	down	down					down	up	7
KLF9	down	down	down			down		down	down	down		7
HELLS	up	up	up				up	up	up	up		7
C10orf95	up	up	down		down		up		down		up	7
CENPL	up	up	up				up	up	up	up		7
MYOT	down		down	up	up		down			down	down	7
CRY2	down	down	down	up				down	down	down		7
PILRB	up		up		up	up		up	up	up		7
PAEP	up		up		up	up	up	up		up		7
NUDT10	down			down	down	down	down		up	down		7
ITIH5	down	down				down	up	down	down	down		7
HOXC12	up	up	up		up			up	up	up		7
STIL	up	up	up				up	up	up	up		7
CKS2	up	up	up	up			up		up	up		7
PI3	up				up	up	up	up	up		up	7
ARHGAP40	up			down		up	up	up	up		up	7
PTGIS	down	down	down	down			down		down	down		7
MAGEA10	up	up	up				up	up	up	up		7
HIF3A	down	down	down	down					down	down	down	7
OR2B6	up	up	up				up	up	up	up		7
MT1G	up	up		down	down	down	down			down		7
C3	down	down	down		up	up			down		up	7
LRRN4	up		up	down		up			down	up	up	7
XRCC3	up		up	up	up	up	up		up			7
CFP	down	down	down		up		down	down	down			7
RHOJ	down	down		down		down		down	down	down		7
CTAG2	up	up	up				up	up	up	up		7
ATP13A4	down	down	down				down	down	down	down		7
BEST3	up		down	down		up		up	up	up		7
KLF2	down	down	down	down				down	down	down		7
SYNGR3	up	up	up	up			up	up	up			7
FGL2	down	down		down			down		down	down	down	7
RASL11B	up	up	up	down	down	down			up			7
VGF	up	up				up	up	up	up		up	7
STRIP2	up	up		up			up	up	up	up		7
FLNC	down	down	down			up	up			down	down	7
LRRC4	down			up		down	down	down		down	up	7
FEZF1	up	up	up				up	up	up	up		7
CGNL1	down		down		down	down		down	down	down		7
CHAC1	up	up		up	down	down		up	up			7
ATP1B2	down	down		down		down		down	down	down		7
SGO1	up	up		up			up	up	up	up		7
CDH15	up	up	down	up		down		up			up	7
LBP	up		down	down	up			up	up	up		7
FAM155B	up	up		up		up	up	up	up			7
EPO	up	up	up	down	up	down			up			7
KLHDC7B	up	up	up	up				up	up		up	7
GATA5	down	up		down	down	down		down	down			7
PRDM12	up	up				up	up	up	up	up		7
HSD17B3	up				up	up	up		up	up	down	7
RGN	down	down	down		down	down			down	down		7
BPIFA2	up	up	down	up			up	up		up		7
CKMT2	down	down	down	up		down			down	down		7
FAAP24	up	up	up			up	up	up	up			7
ENAM	down	down	down		down				down	down	down	7
TESMIN	up	up		up			up	up	up	up		7
BHMT2	down	down	down	down		down		up		down		7
CHIT1	up		up	up	up	up				up	up	7
SEC14L4	up	up		down				down	down	up	up	7
CCNB1	up	up	up				up	up	up	up		7
PSRC1	up	up	up				up	up	up	up		7
MYCN	up	up			down	down	up	up	up			7
EMP1	down	down	down	down				down	down	down		7
ANXA1	down	down	down		up	up				down	up	7
FAM189A2	down	down	down	up				down	down	down		7
PKIB	up	up		up		up	up	up	up			7
TTYH3	up	up	up		up			up	up	up		7
KLF4	down	down	down	down				down	down	down		7
TMOD1	down	down	down					down	down	down	down	7
ALDOB	up	down		down	down	down	down			down		7
GABBR2	up	up			up	up	up	up			up	7
DSCC1	up	up	up				up	up	up	up		7
IL33	down	down	down				down	down	down		down	7
KIF23	up	up	up				up	up	up	up		7
CH25H	down	down	down	down		down			down	down		7
OIT3	up	up		down		down	down		down		up	7
CILP	down		down		down		down	up	up	down		7
ARHGAP24	down	down		down	down	down		down			down	7
CXCL9	up	up	up		up			up	up	up		7
KIAA1644	down	up	up	up	up			up		down		7
LGR5	up			down	down	down	up		up	up		7
GALNT6	up	up	up	down	down			up	up			7
SSTR1	down	down	down	down				down	down	down		7
SYT16	up		up			up		up	up	down	down	7
RDH12	up			down	down	down			up	down	down	7
FGF7	down	down	down	up		down			down		down	7
GCNT3	down		down	down	down		up	up	up			7
ST8SIA2	up	down	up	down				up	up		up	7
LRRC46	up	up	down			up		down	down	up		7
SLC13A5	up		up	down	down	down		up	up			7
GRB7	up	up		down	down			up		up	up	7
PGGHG	up		up		up	up	up	up		up		7
PLK4	up	up	up				up	up	up	up		7
ECM1	down	up	down				down	up		down	up	7
SYT14	up	up	up	up		up		up	up			7
DQX1	up	up			up	up	up	up	up			7
NT5DC4	up	up	up	up				up	up	up		7
LYG1	up			down		up	up	up	up	up		7
AFF3	down		down	down	up			down	down	down		7
HES6	up	up				up	up	up	up		up	7
EPHA5	down	down	down		down		up			down	down	7
OCIAD2	up	up	up	down		up		up	up			7
GLRA3	up		up	up	down	down		up	up			7
PLA2G7	up		up	up	up	up				up	down	7
RASGEF1C	down			down	up	up		up	up	down		7
MLIP	down	down	down	up	up				up	down		7
IGFBP1	up	down			up		down	up		up	up	7
SSC4D	up			down	down		up	up	up	up		7
MAGEA4	up	up	up				up	up	up	up		7
RGS20	up		up		up	up	up	up	up			7
GINS4	up	up	up				up	up	up	up		7
PMP2	down	down	down		down				up	down	down	7
FAM135B	down	up	down			up	up			down	down	7
FAM13C	down	down	down	up				down	down	down		7
HABP2	up			down	up	up	down	up	down			7
CHEK1	up	up	up				up	up	up	up		7
C20orf144	up	up	up				up	up	up	up		7
FXYD4	up		down	down	down	down		up	down			7
FCGR1A	up	up		up	up	up			down	up		7
LYPD1	up	up	up				up	up	up		up	7
SPATA4	down		down	down				down	down	down	down	7
ITPR1	down		down	up		down			down	down	down	7
ENKUR	up	up		down	up			down	down		down	7
GPR158	up	up	up				up	up	up	up		7
ADAM8	up	up	up		up	up		up		up		7
GFRA1	down	up	down					down	down	down	down	7
TUBA3E	up	up	up		up	up	up		up			7
CENPH	up				up	up	up	up	up	up		7
PDLIM3	down	down	down	down					down	down	down	7
PIEZO2	down		up		up		up	down	down		up	7
KLF10	down	down		down			down	down	down	down		7
GNA14	down		down	down		down	down		down		down	7
SLC28A1	up		down	down	up		down	up		down		7
CXCL13	down		up	up	up			up	up		down	7
PPP2R2B	down	down		down	down	down			up	down		7
LRFN2	up	up	down	up			up	up	up			7
LRP8	up	up	up				up	up	up	up		7
FAM46B	down				down	down		down	down	down	down	7
KCNB1	down	down	down	down	up				down	down		7
NRG2	down	down	down	up			up		down	down		7
DNAH3	up	up	down			up	up		down	up		7
STARD9	down	down		up	up			down	down	down		7
ANKLE1	up		up		up	up	up	up	up			7
TONSL	up	up	up				up	up	up	up		7
RECQL4	up	up		up			up	up	up	up		7
COX7A1	down	down	down	up				down	down	down		7
FAM171A2	up	up			down		up	up	up		up	7
RACGAP1	up	up		up			up	up	up	up		7
CCNF	up	up	up				up	up	up	up		7
FGF19	up		up				up	up	up	up	up	7
PLPP3	down	down	down			down	down	down	down			7
NEXN	down	down	down					down	down	down	down	7
KCNT2	down	down	down	down		up		down	down			7
CADM3	down	down			up	up			down	down	up	7
SLAMF9	up		up		up	up		up	up	up		7
PM20D1	up	down		down	down	down			down	down		7
LRRTM1	down		down	up		down		up	up	down		7
EIF4E3	down	down	down				down	down	down	down		7
CIP2A	up	up	up				up	up	up	up		7
DPPA2	up		up	down	down			up	up	up		7
NFASC	down			down	down	down		down	down	down		7
NKX6-1	up	up	up	up				up	up	down		7
PTX3	down		down			down		down	down	down	down	7
C3orf67	up	up			up	up		up	up	down		7
CXCL5	up				up	up	up		down	up	up	7
KIF15	up	up				up	up	up	up	up		7
CLEC3B	down	down	down			down		down	down	down		7
LRRC2	down	down	down		down	down		down	down			7
GRIK3	down		down	up	up		down			down	up	7
RFC4	up	up	up				up	up	up	up		7
EMCN	down	down	down	down		down		down	down			7
PITX2	down		down		up	up	up	up	up			7
HHIP	down	down		down			down	down	down		down	7
CDC20B	up	up		up	down	down	up			up		7
CAGE1	up		up	down			up	up	up	up		7
SBSPON	down			down			up	down	down	down	down	7
CPA6	down	up	up	up	up		up		up			7
RNF183	up		down	down			up	up	up		up	7
CLDN2	up	down		down				up	down	up	up	7
GJB2	up	up			up		down	up	up	down		7
TMEM63C	up	up		up			up	up	up	down		7
SOHLH1	up	up	up				up	up	up	up		7
TMEM52B	up	up	up		down	down	up			up		7
LARGE2	up		up		down		up	up	up	up		7
SMCO2	up	up			up	up	up	up	up			7
AVPR1A	down	down		up		down	down			down	down	7
CLEC3A	down	up		down	down	down			up	down		7
PLIN1	down	down	down	down		down	down			down		7
SCG5	up		up		up	up		up	up		up	7
MS4A15	up	up	up					down	down	down	up	7
AQP2	down		down	down	down	down			down	up		7
PPP1R14A	down	down		down		down		down	down	down		7
DNAAF3	up	up		down		up		down	down	up		7
C19orf48	up	up		up			up	up	up	up		7
KLK2	up	down		up	up		up			up	down	7
KLK6	up			down	down			up	up	up	up	7
KLK13	up		down	up	up				up	down	up	7
DNASE1L2	up	up					up	up	up	up	up	7
ACOX2	down		down		down	down	down		down	down		7
SCN11A	down	down	down	down				down	down		down	7
FEN1	up	up	up				up	up	up	up		7
GFRA2	down	down		down		down		down	down	down		7
CA7	up		down	up				up	up	down	up	7
SHOX2	up		up		up		up	up	up	up		7
STXBP6	down	down	down	up			up	down	down			7
PARM1	down	down	down		down	down	up		down			7
GSG1L	down		down		down	down		down	down	down		7
CXCL10	up	up	up	up	up				up	up		7
P2RY12	down	down			up	up	down	down	down			7
NPR1	down	down	down	down				down	down	down		7
BOLA2B	up	up		up		up	up	up	up			7
MYRIP	down	down	down	up				down	down	down		7
RNF150	down	down	down		down	down				down	down	7
FAXDC2	down	down	down				down		down	down	down	7
CNGB3	up		up	up			up	up	up	up		7
CDK1	up	up	up				up	up	up	up		7
CST5	up	up	down					down	down	up	up	7
KRT78	down	up	down					up	up	down	up	7
SLC23A1	up	up		down	down	down			down	down		7
SHCBP1	up	up	up				up	up	up	up		7
PDE7B	down	down		down		down	down		down	down		7
CDK5R2	up	up	up		up	up		up	up			7
MAP6	down		down		down	down		down	down	down		7
FGB	up			down	up		down	up	up	up		7
NMUR1	down	down			up		down	down	down	down		7
ANO5	down		down	up	down				down	down	down	7
FRMD5	up		up			up		up	up	up	up	7
ZNF556	up			up	down		up	up	up	up		7
MTBP	up	up	up				up	up	up	up		7
TPSAB1	down				up	up		down	down	down	up	7
CLEC12A	up		up		up	up	down	down	down			7
RCAN2	down	down	down	up		down			down	down		7
SNTG2	down	down	down			up		down		down	down	7
COL6A5	down	up			down			down	down	down	up	7
MYEOV	up	down			up	up		up	up		up	7
MRGPRF	down	down			down	down		down	down	down		7
ADAMTS20	up	up	up		up			up	up	up		7
OLR1	up	up	up				up	down	down	up		7
CSPG4	down		up	up	up		up			down	up	7
WFIKKN2	down	down	down		down			down	down	down		7
HAP1	up	down	up		down			up	up		down	7
43169	up	up		up	down	down			down		up	7
SLCO4C1	up		down	down			down	down	down		up	7
CNIH2	up	up		up	up	up	up		up			7
GOLGA8A	up	down			up	up	up		up		up	7
CATSPER1	up	up			up	up	up		down		up	7
ETV4	up			up			up	up	up	up	up	7
C11orf16	up	up			down	down		down	down	up		7
ATAD5	up				up	up	up	up	up	up		7
B3GNT4	up		up		up		up	up	up	up		7
GNG7	down	down	down		down	down			down	down		7
GRIN1	up			up		up	up	up	up		up	7
TCIM	down			down	down	down	down		down		up	7
C8G	up	up		up	up			up	up	down		7
SCN4B	down	down			up		up	down	down	down		7
ZBED2	up	up				up	up	down	down	down		7
RPRM	down		down	down	down	down			up	down		7
GLDC	up	up		down	down			up	up		down	7
RNF186	up	down	down	down		down		up		down		7
APOLD1	down	down	down		up	down		down	down			7
FAM133A	up		up	down			up	up	up	up		7
LSMEM2	down		down	down	down	down		down			down	7
ALOX15B	down				up	up	up		down	down	up	7
WDR97	up	up			up		up	up	up	up		7
GPBAR1	down	down		down	down	down		down	down			7
F2	up		up		up	up		up	up	up		7
CYP8B1	up			down	down	down	down	up			down	7
SERTM1	down	down			down			down	down	down	down	7
SLC47A2	up	down	up	down	down		up		up			7
HOXC9	up		up				up	up	up	up	up	7
CXCR2	down	down	down				down	down	down	down		7
FANCB	up	up	up				up	up	up	up		7
ATG9B	up	up		up	up			up	up	down		7
RGMA	down	down	down			down	up		up	down		7
KPNA2	up	up	up				up	up	up	up		7
MAGEB17	up	up		up	up		up	up	up			7
TCEAL7	down	down	down	down				down		down	down	7
PCP4	down		down	up	down		up	up		down		7
FREM3	down	down			down	down		down	down		up	7
TNFAIP8L3	down		down	up				down	down	down	down	7
NPBWR1	up		up			up	down	up	up		up	7
TRAIP	up	up				up	up	up	up	up		7
AIFM3	up	up		up		up	up		up	up		7
SLC35F3	up	down		up	up			up	up		up	7
NPW	up	up	up			up		up	up		up	7
ST6GALNAC3	down	down		down	down	down		down	down			7
CLDN5	down	down		down		down		down	down	down		7
C1QTNF12	up		up	down			up	up	up		up	7
SOCS3	down	down		down			down	down	down	down		7
ANKS1B	down		down	down			up		down	down	down	7
MAGEA11	up	up	up				up	up	up	up		7
PARPBP	up	up		up			up	up	up	up		7
MORN5	down		down	down		up		down	down	down		7
DNAH14	up	up	up				up	up	up	up		7
SAPCD2	up	up		up			up	up	up	up		7
SLC51B	down	down	down		down		up		down	down		7
KRT16	up	up			up			up	up	down	up	7
QRFPR	up		up		up	up		down	up		up	7
ESPN	up	up		down		down		up	up		up	7
TMPRSS6	up	up			up	up		up		down	up	7
FOXD3	down	up	up					up	up	down	down	7
ANGPTL5	down	down	down					down	down	down	down	7
C11orf96	down	down				down	down	down	down	down		7
LIN28B	up	up	up				up	up	up	up		7
COL14A1	down	down	down	down	down	down			down			7
MESP2	up	up				up	up	up	up	up		7
SMTNL2	down		down	down	down		up	down	down			7
SBK1	up	up			down	up		up	up	up		7
PLAC9	down	down	down		up			down	down	down		7
NKAPL	down	down	down			down		down	down	down		7
SYCP2	up	up	up	up				up	up	up		7
MYT1	up	up	up	down			up	up	up			7
FAT4	down	down		down			down	down	down		down	7
KIF19	down		down		up		down	down	down		down	7
GIMAP5	down	down		down	up	down		down	down			7
STK31	up	up	up				up	up	up	up		7
CGB7	up	down	up		up			up	up		up	7
S100A5	up				down	down		up	up	up	up	7
FAM110D	down	down	down			down		down	down	down		7
SERPINA1	up			down	up	up	down		down		up	7
TPSB2	down				up	up		down	down	down	up	7
RAD54B	up	up	up				up	up	up	up		7
CFAP43	up		down	down				down	down	up	down	7
STPG3	up		up		up		up	up	up	up		7
FAM212B	down	down				down	up	down	down	down		7
SULT1C4	down	down		down		up		down	down		down	7
PLN	down	down	down	down		down			down	down		7
WDHD1	up	up	up				up	up	up	up		7
MAGEA1	up	up	up				up	up	up	up		7
EPS8L3	up		down	down	up	up	up	up				7
RASGEF1A	up		up	down			up	up	up	up		7
HIST2H2BF	up	up	up				up	up	up	up		7
ZYG11A	up	up		down	down	down		up	up			7
CDSN	up	up				up		up	up	up	up	7
SPDYC	up	up	up		down			up	up	up		7
MROH6	up	up				up	up	up	up		up	7
IGFL4	up			down		up		up	up	up	up	7
AARD	down	up	down	down				down	down	down		7
MT1A	down		down	down			down		down	down	down	7
KRT81	up	up		up	up	up	up	up				7
ACKR1	down	down	down	down				down	down	down		7
MXD3	up	up			up	up	up	up	up			7
TMEM213	up	down	down	up	down	down			down			7
PLXNA4	down	down		down	down	down			down		up	7
LINC00694	down	down		down	down	down		down	down			7
CYP21A2	down	up	down	down	up	up		up				7
ASCL5	up	up			up	up		up		up	up	7
CLEC2L	up		up	up			up	up	up	up		7
ARHGEF38	up		down		down		up		down	up	up	7
NME1	up	up				up	up	up	up	up		7
AQP1	down	down	down	down				down	down		up	7
C1QTNF9	down	down	down	down		down			down	down		7
SPRR2A	up		down	down	down			up	up	down		7
APELA	up		up	down	down			up	up	up		7
ECSCR	down	down	down		up	down		down	down			7
PCDHGB7	down	down		down	up			down	down	down		7
AL163636.2	down	down	down	down	up		down		down			7
LYPD8	up	up	up				up	up	up	up		7
TCF24	up	up	up		down	down		up	up			7
CSAG2	up	up	up				up	up	up	up		7
CSAG3	up	up	up				up	up	up	up		7
ZNF728	down	down	down		down	down	up		down			7
AC025594.2	up				up	up	up	up	up		up	7
ZBTB8B	up			down	down			up	up	up	up	7
EPOP	up	up				up		up	up	up	up	7
HIST1H3B	up	up	up				up	up	up	up		7
HIST1H4I	up	up	up		up	up		up	up			7
HIST1H4E	up	up	up		up		up	up	up			7
SRCIN1	up	up		up		up		up		up	up	7
SRD5A2	down	up	down	down	down		down		down			7
SLC4A1		down		up	down	down	down	down	down			7
TENM1		down	up		up	up		up		down	up	7
HHATL		down	down	up	up	up			down		up	7
SLC11A1		up	up		up	up		down	down	up		7
MARCO		down			up	up	down	down	down		up	7
UTS2		up	up		up	up	up			up	up	7
TNFRSF9		up	up		up	up	up	up		up		7
FSTL4		up			down	down	up	up	up		up	7
BCAS1		up	down	down	down		up	up		down		7
COL17A1		down	up	down		up		up	up	down		7
PLA2G10		up		up	up			up	down	down	up	7
PPP2R2C		up			up	up	up	up	up	down		7
SNCB		up		up	up	up		up	up	down		7
CA12		up		up		down	up	up	up		up	7
FAP		up	up				up	up	up	up	up	7
DUSP13		up	down				up	up	up	down	up	7
WNT11		down			down	down	down		up	up	down	7
MT3		up	down	up	up		up		up	down		7
TESC		down	down	down		up	up	up			up	7
NOS1		down	down	down	down	down		down		down		7
JPH4		down		down	down	down		down	down	down		7
SLC7A8		up	up		down	down	down		up	down		7
TYRO3		down	down	down	down	down	up				up	7
CBARP		up		up	down	down		up	up		up	7
SLC5A4		down			up	down	up	down	down	down		7
DHRS2		up	up	up			up	up		up	up	7
SLC52A3		up			down	down	up	up	up		up	7
PAK5		down		up		down	down	down	up		down	7
CAB39L		down	down		down	down		down	down	down		7
UPK1A		up	down	down	down		up	up		down		7
NPTX2		up		up	up	up	up	up			up	7
AGR2		up	down	down	down		up	up			up	7
ALDH3A1		down	down			up	up	up	up	down		7
CWH43		up		up	down		down	down		down	down	7
NMU		up	down		up	up		up	up		up	7
TRIM2		down	down	up	down	down		up	up			7
PRMT8		up	up	up	down	down			down		up	7
ART4		down	down	down			down	down	down		down	7
PACRG		down	down	up		down		down	down	down		7
UNC5A		up		up	up	up	up			up	down	7
FNDC4		down	down			up	down	up		down	up	7
NT5C1A		down	down		down	down		up		down	up	7
CHRNB4		up	up				up	up	up	down	up	7
MUC5B		up	down	up	up		up	up		up		7
CNR1		down			up	up	up	down	down	down		7
SOCS2		down		down		down	down	down	down	down		7
CSMD2		up	up				up	up	up	up	up	7
KLHL31		down	down	up	up	up	up		up			7
LAMP5		up	up				up	up	up	up	up	7
PZP		down	down	down	up		down	down	down			7
SYT5		up	up		up	up	up	up	up			7
ATP8B3		up	up		up	up	up	up	up			7
COL5A1		up	up		up			up	up	up	up	7
FIBCD1		up	up		up	up	up			up	up	7
CCL25		up		up	up		up	up	up	down		7
TNS4		down		up	down	down		up	up	up		7
POSTN		up	up		up		up	up	up		up	7
SPOCD1		up	up		up	up	up			up	up	7
WDR38		up	down	down		up		down	down		down	7
DMRT1		up	up	up				up	up	up	up	7
IGFBPL1		up	up	down			up	up	up		down	7
TTPA		down	down	down	down	down		down	down			7
TMPRSS4		up		down	down	down		up	up		up	7
GIPC2		down	down	down		down	down	down	down			7
BMPR1B		up	up	up	down	down	down			down		7
ERP27		up		up	down	down	up		down		up	7
PIK3C2G		down	down		down	down	down		up		down	7
PTPRQ		down		down	down	down		down	down		down	7
ASCL1		up	down	up	up	up		up	up			7
SORD		up		down	down	down	down	up	up			7
ADAMTS18		down			up		up	up	up	up	up	7
PADI3		up	up		up	up	up	up	up			7
CRABP2		up		down		down		up	up	down	up	7
HORMAD1		up	up		up	up		up	up	up		7
EFNA3		up			up	up	up	up	up		up	7
OSR1		down	down	down		up	up		down		down	7
NKD2		up	up	up	up			down		up	up	7
DNAJC5B		up		up	up	up		down	down	up		7
DPYS		down		down	down	down	down		down	up		7
SHC3		down			down	down	up	down	down		up	7
GRIK4		up		down	up		up	down	down		down	7
CDH8		down		up	up		up		up	down	up	7
THRSP		down	down	up		down	down			down	up	7
TMEM178A		down	down	down	down	down		down	down			7
SLC16A12		down	down	down	down	down			down	down		7
CLGN		up		up	up	up	up	up	up			7
GAL3ST2		up		down	down		up	up	up	up		7
AFF2		down	up	down	up	up	up				up	7
MMP14		up	up		up	up	up	up	up			7
LAD1		up		down	down	down		up	up		up	7
HOXB13		up	up		up	up	up	up	up			7
CLIC6		up	down	up		up	down	up		down		7
PLA2G4D		up		up	up	up		up	up	down		7
CPAMD8		down	down	down	down	down		down	down			7
TFF3		up	down	down		down	up	up			down	7
TFF1		up	down	down				up	up	down	down	7
ALPL		down		down		down	down	down	down		up	7
C1orf115		down	down	down				down	down	down	up	7
PIGR		down	down	down	down	up			down	down		7
CAPN13		up	down	up		down	up	up		down		7
CFAP221		up	down	down	down				down	down	down	7
CLDN19		down	up	down	down	down	up	down				7
NPY1R		up	down	down	down	down	down		down			7
F2RL2		up	up	down				up	up	up	up	7
NDRG2		down	down		down	down	down	down		down		7
NELL1		up	down	down	down	down		up	up			7
NETO1		up	up	up	up			up	up		up	7
LMO1		up	down	down		down		up	up	down		7
MMP10		up	up				up	up	up	up	up	7
ELFN2		up	up			up	up		down	up	up	7
MS4A14		up	up	up	up	up		down	down			7
LOXHD1		down		up		down	up	down	down	up		7
CORO6		up	down		up	up	up		up	down		7
PSCA		up	down		down		up	up		down	up	7
ANGPTL4		down		down	up	up		up		down	up	7
EVPL		up	down	down	down		up			down	up	7
SLC22A11		down	up	down			up	up	up	up		7
GBX2		up	up		up			up	up	up	up	7
COL3A1		up	up		up			up	up	up	up	7
NPNT		up	up		down	down	up	down	down			7
ATOH8		down	down	down			down	down	down	down		7
ZBBX		up	down	down		up		down	down	up		7
GP2		up	down	down	down	down	up	up				7
LINGO1		up			up		up	up	up	up	up	7
FABP4		down				down	up	down	down	down	down	7
IRX1		down		down	down	down		down		down	up	7
CDH2		up	up	down	up	up		up			up	7
CEL		up		up	down	down	up	up	up			7
FUT3		up	down	down	down			up	up		up	7
PAH		up		down	down	down		up	up	up		7
SCG2		up			up	up	up	up	up	down		7
ID4		down	down	down				down	down	down	down	7
IL17D		down	down	up			up	down	down	down		7
ABLIM3		down	down		up		down	down	down	down		7
PC		down		down	down	down		up	up		up	7
MUC13		up	down	down	down	down	up	up				7
SLC16A11		down	down	up		down	up	down	down			7
BRSK2		up	up		up		up	up	up		down	7
SEZ6L2		up			up	up	up	up		up	up	7
TMEM270		up		down		up	up	up	up	up		7
DOK7		up	down		down		up	down	down		up	7
PLEKHD1		up	down	up	down	down				up	down	7
CRYBG2		up	down	down			up		up	down	up	7
CDK5R1		up		up	up	up	up	up	up			7
FUT2		up	down		down		up	up	up		up	7
TUBAL3		up		down	down	down		up	up	down		7
PLD5		down	down	down	down			up		down	down	7
USH1G		up		down		up	up	up	up	down		7
IDH2		up	down	up	down	down		up	up			7
PTGDR2		down	down	down			up	down	down	down		7
EMILIN3		down		down	down	down			up	down	up	7
TMPRSS2		down	down	up	down	down	down		down			7
CLCNKB		down	down	up	down	down			down		down	7
DLK1		down	down	down	down		up	up	up			7
MYBL1		up	up	up	up	up	up	up				7
THBS2		up	up		up	up		up	up	up		7
GLDN		down		up		up	up	down	down		up	7
TNFRSF18		up	up		up	up	up	up	up			7
AKR1C1		down	up			up		up	up	down	down	7
TPRG1		up	down	up	up			down		down	up	7
GJB3		up		down		up	down	up	up		up	7
S100A14		up	down	down	down		up		up	down		7
CXCL17		up	down		down		up		down	down	up	7
SPOCK3		down		down	down	down			up	down	up	7
AKR1C3		down	up	down			up	up	up	down		7
SLC6A17		up		up	down	down	up	up	up			7
OGDHL		up		up	down		down	up	up		down	7
MAP1LC3C		down	down			up		down	down	down	down	7
PRB3		up	down	up				up	up	up	up	7
PAX9		up	down			up		up	up	down	up	7
SOWAHA		up	down		down	down	up		up	down		7
CR1		down		down	down	down	down		down		down	7
ERICH4		down		down	down	down		down	down	down		7
CCNI2		up			down	down	up	up	up	up		7
KRTAP5-1		up		up	up	up	up	up		up		7
HBA1		down	down				down	down	down	down	down	7
MAGEA12		up	up		up		up	up	up	up		7
RNF223		up	down	down	down	down				down	up	7
TDGF1		down	down		down	down	up		down		down	7
HP		down	down		up		down		down	up	up	7
MGAM2		down	down	down	up		up		up		down	7
AC010616.1		up	up		up	up	up	up			down	7
HOXA11			up		down		up	up	up	up	up	7
CCL26			up	down			up	up	up	up	up	7
FMO1			down	down			up	up	up	up	down	7
EYA2			down	down	down		down	up	up	down		7
NTN4			down	down	down	down	down	down	down			7
RBFOX1			down		down	down		up	up	up	up	7
CLUL1			down	down	down	down	up			down	down	7
CACNA1S			down	down	down	down	up	down	down			7
SEMA5B			up	down	up	up	up		up	up		7
SULT2B1			down	down	down	down	up			down	up	7
DOCK3			down	up	down		up	up	up	down		7
TMEM40			down		down		up	up	up	down	up	7
MYH7			down	down	down	down			up	down	down	7
RASD2			up	up	up		up		up	down	up	7
AQP9			up		up	up		down	down	up	up	7
PDE4C			down	down		down	up		down	down	up	7
PKD2L1			up	up	up	up		down		up	up	7
CYP2C18			down	down	down		down	up	up	down		7
KIAA1549L			up		down	down		up	up	up	up	7
ELOVL4			down	up			up	up	up	down	up	7
PIWIL1			up	down		down		up	up	up	up	7
C1orf61			up	up	up	up	up	up		up		7
AIF1L			down	down	down	down	up			down	down	7
TSPAN8			down	down	down	down	up	up			down	7
C1QL1			up		up		up	up	up	down	up	7
PPP1R1B			down		down	down	up		down	up	up	7
ITGB4			up	down		up	up	up	up		up	7
LOXL2			up		up		up	up	up	up	up	7
MRO			down	down	down	down	down			down	down	7
CLDN10			down	down	down	down		up	up		up	7
ELF5			down	down	down	down			down	up	up	7
SERPINE2			up	down	up	up	up	up	up			7
SCEL			down	down		up		down	down	down	up	7
MMP7			down	down		up		up	up	up	up	7
BTBD16			up	down	up	up		up	up	up		7
CYP4B1			down		down	down		down	down	down	up	7
MUC4			down	up		down		up	up	up	up	7
BHMT			up	down	down	down	down	up	up			7
CXCL14			up	down			down	up	up	down	up	7
LCN2			down	up	down	up	up	up			up	7
SERPINH1			up		up	up	up	up	up	up		7
OLAH			down	down	down	down	up		down		up	7
CABYR			up		up	up	up	up	up		up	7
DNAAF1			down	down		up	up	down	down		down	7
GAREM2			up	up	up	up	up	up	up			7
FTCD			up	down	down	down	down	up	up			7
AZGP1			down		down	down	down	up	down		down	7
HK3			up		up	up	down	down	down	up		7
COL26A1			up	down	down	down			up	up	up	7
SLITRK5			down	down	up	up	up			down	down	7
SLC16A9			down	down		down	up	up	up	down		7
RRAD			down		up	up		down	down	down	down	7
GPT			down	down		down		up	up	down	up	7
SOST			up	down	down	down		down	up		down	7
NETO2			up	up	up		up	up	up	up		7
MYOZ1			down	down	down	down		down	down	down		7
ALX1			up	down	down		up	up	up	up		7
TNFSF15			down	up	down		up		down	up	up	7
NRG3			down	up	up	up		down	down	down		7
VSIG10L			down	up		up	up	up	up	down		7
TRABD2A			up		up	up	up		down	up	up	7
HRCT1			down	down		up	up	down	down	down		7
NUDT11			up	down		down	up		up	down	up	7
TRIM31			down	down		up	up	up	up	up		7
KRT40			down	down	down	down		up	up	up		7
UGT2B11			down	down		up	up	up		down	down	7
UBE2QL1			down	up		down		up	up	down	up	7
PCP4L1			down	down	down	down		up		down	up	7
MC1R			up	up	up	up	up	up		up		7
CD5L				up	up	up	down	down	down		up	7
F11				down	down	down	down	down	down	down		7
SLC16A8				up	up	up	up	up	up	up		7
OLFM3				down	down	down	up		up	down	down	7
ANGPTL3				down	down	down	down	up	up	down		7
CCDC146				down	up	up		down	down	down	down	7
FBN3				up		down	up	down	down	up	up	7
TIMD4				up	up	up	down		down	down	down	7
CBR3				up	up		up	up	up	down	up	7
LRRC36				down	up	up	up	down	down	up		7
GRIK2				down	down	down	up	up	up	down		7
KCNV1				down	up	up		up	up	up	up	7
HS6ST2				down	down	down	up	up	up		up	7
SRRM3				up	up	up	up	up	up		up	7
CALML3				down	down		down	up	up	down	up	7
S100A2				down	down	down		up	up	down	up	7
XDH					up	up	down	up	up	down	up	7
C1orf112	up	up	up					up	up	up		6
DBF4	up	up		up				up	up	up		6
PRSS21	up		up		up	up			up	up		6
MAPK8IP2	up	up					up	up	up	up		6
GABRA3	up	up					up	up	up	up		6
CHDH	up		down	down	down				down	up		6
HGF	down	down		down		down	down		down			6
EHD2	down	down			up	up		down	down			6
PREX2	down	down	down		up			down	down			6
CELF2	down	down		up				down	down	down		6
PTGER3	down	down	down		down	down				down		6
HOMER3	up	up	up			up	up		up			6
CCDC85A	down	down	down					down	down		down	6
CAMK2B	up		down	up			down	up	up			6
DLX3	up	up		down	down			up	up			6
NTN1	down			up		down			up	down	down	6
GLP2R	down	down					down		down	down	down	6
KLF6	down	down					down	down	down		down	6
ATP2B3	down	up		down	down	down				down		6
STON1-GTF2A1L	down	down						down	down	down	down	6
PYGM	down	down	down			down			down	down		6
MAOB	down		down	down				down	down	down		6
HES2	up	up	up				up		up		up	6
CNGB1	up		up	up				up	up		up	6
FERMT2	down	down					down	down	down	down		6
PTGS2	down	down	up		down	down	down					6
WNT8B	up			down	down	down			up	up		6
ITGA8	down			down		down		down	down	down		6
RUNX1T1	down	down				down		down	down		down	6
EPHA6	down				up			up	up	down	down	6
SCTR	up	down		down	down	down			down			6
IL12RB2	up		up		up	up		up	up			6
COL19A1	down			down		down			up	down	up	6
KCNK2	down			down			up	up	up		down	6
SLCO1A2	up	down		down	down			down		up		6
GCKR	up		down			up	down	up			up	6
ABCB1	down	down		down	down			down	down			6
PHACTR3	up		up				down		down	up	up	6
SLC15A1	up	up		down				up	up	down		6
LTBP4	down	down		down				down	down	down		6
NRCAM	up	up					up		up	up	up	6
SLC26A3	down	down		up			up	down		down		6
APOH	up			down	down	down			down		up	6
PITPNM3	down			down	down	down	down			down		6
CMA1	down	down	down					down	down	down		6
TLL2	up	up				up	up	up	up			6
SORBS1	down	down	down					down	down	down		6
SYDE2	down		down	down		down	down		down			6
SCD	up	down		up	up	up					up	6
EFNA2	up	up			up	up		up	up			6
KDELR3	up	up				up		up	up		up	6
PVALB	up	up		up		down	down	down				6
CDKL1	down				down	down		down	down		down	6
PLEK2	up	up	up	up				up	up			6
SERPINA4	up				down	down	down	up	up			6
CPNE6	down			down	down	down	down			down		6
PCK2	up			down	down	down	down			down		6
SGK2	up	down	down		down			up			up	6
BIRC7	up			up	up	up				up	up	6
CCM2L	down	down		down		down		down	down			6
BMX	down	down	down		up			down	down			6
VGLL1	up			down	down	down				up	up	6
ITIH6	up	up		up				up	up	up		6
ZDHHC15	down	down	down		down				down	down		6
RGCC	down	down			up	down		down	down			6
WFDC1	down			down			down	down	down	down		6
FOXF1	down				up		down	down	down	down		6
RHBDL1	up	up	up				up	up	up			6
CRYM	down	up	down	down	down				down			6
CORO2B	down	down			down			down	down	down		6
IGDCC4	down		down		up	up	up	up				6
NCALD	down	down	down	up					down	down		6
FGL1	up		up	down			down	up		up		6
RNASEH2A	up	up	up				up	up	up			6
KLC3	up				down		up	up	up		up	6
SLC1A6	up	up			up	up		up	up			6
FSD1	up	up	up	up				up	up			6
LIG1	up	up				up	up		up	up		6
LILRB5	down	down			up		down		down	down		6
ISYNA1	up			down				up	up	up	up	6
SCN1B	down		down	up	up	up					up	6
RUNDC3B	down	down	down	down				down	down			6
STEAP1B	up		up		up		up	up	up			6
ECM2	down	down		down		down		down	down			6
ELAVL2	up	up	up	up				up	up			6
SORCS1	down	up	down	down	down					down		6
HOXB6	up	up	up		down	down					up	6
KAT2A	up				up	up	up	up	up			6
GABRA4	down	down	down		down	down		down				6
PF4V1	up			down	up	up			up	up		6
NKX3-2	up	up	up				up	up	up			6
CCDC34	up			up			up	up	up	up		6
SLC35F2	up	up		up				up	up		up	6
CD69	down				up		down	down	down		down	6
ALDH2	down	down	down				down	down	down			6
TIMELESS	up	up	up					up	up	up		6
SLCO1B3	up		up				down	up	up	up		6
ULBP1	up	up	up				up			up	up	6
BVES	down	down		down	down	down				down		6
MDFI	up						up	up	up	up	up	6
TBX18	down	down	up	down				up	up			6
HBEGF	down	down		down		down		down	down			6
GABRG2	up	up	up				up	up	up			6
PFKFB4	up	up			up	up	up		up			6
PODXL2	up	up					up	up	up	up		6
ZBTB47	down		down	up				down	down	down		6
SLC30A3	up		up				up		up	up	up	6
EVA1A	up		up	down					down	up	up	6
PARD3B	down	down	down		down			down	down			6
RGS2	down	down		down					down	down	down	6
ARTN	up	up	up				up	up	up			6
STMN1	up	up					up	up	up	up		6
TNNT2	down			down	down	down	up				up	6
SGK1	down	down		down			down	down		down		6
EPCAM	up	up			down	down	up	up				6
ELOVL3	up	down	up		down		up			up		6
MTHFD1L	up		up			up	up			up	up	6
PCDHB8	up		up				up	up	up	up		6
DUSP4	down			up	up	up		up			up	6
CLU	down		down			up			down	down	up	6
EPHX2	down		down		down	down	down			down		6
CSTA	down		down		up	up			up	down		6
CD80	up	up	up		up	up				up		6
RECK	down	down	down					down	down	down		6
ZWINT	up	up					up	up	up	up		6
INHA	up	up					up	up	up	up		6
SEMG2	up		down	down	down	down				up		6
F13A1	down	down				down	up		down	down		6
HIST1H1D	up	up	up	down				up	up			6
SOX4	up						up	up	up	up	up	6
MYRF	up		down	down				down	down		up	6
TMEM255A	down	down		up				down		down	up	6
SOX9	up					up	up	up	up	up		6
NKX2-2	up	up	up			up		up	up			6
TMEM35A	down	down	down	up		down				down		6
RGS13	down				up	up		down	down		down	6
AUNIP	up	up	up					up	up	up		6
VIL1	up	up	up	down		down		up				6
ADM2	up	up		up			up	up	up			6
VPREB3	down	up		up				up		down	down	6
BAIAP2L2	up			down	up		up	up	up			6
FOXP2	down	down				up	down			down	down	6
BBOX1	up	down		down			down		up	down		6
ADCY4	down	down		down		down		down	down			6
STARD8	down	down		down		down		down	down			6
LDLR	down				down	down	down	down	down			6
LRCH2	down	down		up				down	down	down		6
KIF1A	up	up			down		up	up	up			6
RBBP8NL	up	up	down		down			up	up			6
AKAP12	down	down		down					down	down	down	6
GALNT15	down	down		down		down			down	down		6
PDLIM4	down	down						up	up	down	up	6
BARX1	up				up	up		up	up	down		6
MAP1B	down	down		up			up		up	down		6
NR0B2	up			up	down	down			down	down		6
SLC6A11	up	up					up	up	up	down		6
RAMP1	down	up		down		down		up			up	6
JCHAIN	down	down	down	down			down			down		6
MATN2	down	down		down	down					down	down	6
REEP2	down			up			up		up	down	up	6
PCNA	up	up					up	up	up	up		6
NES	down			down		down	up	down	down			6
WASF3	down	down			down			down	down		down	6
DCLK1	down		down		up	up		up		down		6
TRPC4	down		up				up	down		down	up	6
STOML3	up		down		up			down	down	up		6
EPHB2	up		up				up	up	up	up		6
KMT5C	up	up			up	up	up		up			6
PEBP4	down		down			down		down	down	down		6
TSPAN2	down			down		down			down	down	down	6
RSAD2	up	up	up	down			down		down			6
SOX5	down	down				down		down		down	down	6
DSC1	up	down	up	down					up	down		6
DTNA	down		down	up		up	up			down		6
PDGFRA	down	down		down	down	down	down					6
PSAT1	up				down		down	up	up	up		6
MSI1	up		up				up	up	up		up	6
ITGA7	down	down	down						down	down	up	6
KRT7	up		down	up	down				down	up		6
ZNF670-ZNF695	up	up	up					up	up	up		6
CKAP2	up	up					up	up	up	up		6
EDNRB	down	down	down				down	down	down			6
ADAMTS7	up		up		up	up				up	up	6
ALPK3	down	down	down	up			up		down			6
IL36RN	up	up						up	up	down	up	6
TCF19	up	up			up		up	up	up			6
ARHGAP20	down	down	down				down		down	down		6
KNL1	up	up	up					up	up	up		6
SLC28A2	up			down	down	down		up		down		6
SIX3	up	up		down				up	up	up		6
CENPO	up	up	up				up		up	up		6
KIF11	up	up					up	up	up	up		6
CHRNA1	up	up		up	up	up				up		6
HCN4	up	up	down		down				down		up	6
ZGRF1	up		up		up		up		up	up		6
GPAT3	down	down			down	down	down			down		6
FGF2	down	down		down				down	down	down		6
FRAS1	up			down	down		up	down			down	6
RDH16	up	up	up				down		up	up		6
HDC	down				up	up			down	down	up	6
DISP2	up		up	up	up	up	up					6
CYP11A1	up	down	down	up		up				down		6
CLEC18B	up			down	up	down		up	up			6
ASXL3	down	down	down				down			down	down	6
GREB1L	up	up	down	down				up	up			6
SLC16A3	up	up			up	up	up	up				6
TM4SF5	up			down		down		up	up	down		6
BEST4	up				up	up	up	up		down		6
SYPL2	down	down	down		down				down	down		6
RGS5	down				up		up	down	down	down		6
S100A8	up	up	down		up				up	down		6
GPR17	down	down		down				down	down	down		6
GULP1	down	down	down	up		up	up					6
PTH2R	up			down			up	up	up	up		6
FANCD2	up	up					up	up	up	up		6
43163	up	up	up		up		up				up	6
RBMS3	down	down		down			down	down	down			6
ITGA9	down	down				down	down		down	down		6
IL17RD	down	down	down					up	up		up	6
TAGLN3	up	up		down	down					down	up	6
TMEM108	down					down	up		down	down	up	6
UCN2	up		up				up	up	up	up		6
STXBP5L	down	up		up				up	up		down	6
TM4SF19	up		up		up	up	up		up			6
SLIT2	down	down		up				down	down	down		6
AHSG	up			down				up	up	up	up	6
TSLP	down	down		down			down	down		down		6
SPINK7	down		down	up		down			up	down		6
TENM2	up	down	up			down			up	down		6
KCNMB1	down	down	down		up				down	down		6
PSD2	up	down	down	up	up						up	6
GFRA3	down				down	down		up		down	down	6
DAAM2	down	down		down		down			down	down		6
PRSS35	down			down	down	down		down	down			6
SLC2A12	down	down			down	down			up	down		6
TRIM50	down	down		up		down	up			down		6
NCAPG2	up	up					up	up	up	up		6
DENND2A	down	down		down		down		down	down			6
CXorf36	down	down			up		up	down	down			6
HTR2C	up	up	up					up	up	up		6
DOCK11	down	down		down		up		down	down			6
ADHFE1	down	down	down		down				down	down		6
CACNA1B	up	up	up					up	up		down	6
VAX1	up	up	up					up	up	up		6
INA	up	up						up	up	down	up	6
KLHL35	up	up	up				up	up		up		6
NCAM1	down	down			up		down			down	down	6
ADAM33	down	down	down						down	down	down	6
ZP1	up				up	up		up	up	down		6
MS4A2	down					up		down	down	down	up	6
DSN1	up	up					up	up	up	up		6
DOC2A	up	up		up	up	up				up		6
CNKSR2	down	down	down					down	down	down		6
PRSS53	up		up		up	up		up	up			6
AKAP6	down	down	down	up					down	down		6
ANO4	down			up	up	up	up				down	6
ITIH2	up	down		down	down				down	up		6
TMEM132D	down			down	up				down	down	up	6
POU4F1	up	up	up		up			up	up			6
PLEKHH2	down	down		down		up		down	down			6
CCNO	up	up				up	up	up	up			6
UTRN	down	down		down		down		down	down			6
ZIC1	up	up	up			up		up	up			6
NR4A2	down		down		down	down	down		down			6
C16orf89	down		down		down	down			down	down		6
LGI4	down	down			up			down	down	down		6
GPR15	down	down			up		down			down	down	6
GBP5	up	up	up		up	up				up		6
CCDC173	down		down	down				down	down		down	6
EPHB1	down	down					down	up	up		down	6
MAGEC1	up	up	up				up	up		up		6
MICU3	down	down	down					down	down	down		6
NAA11	up		up				up	up	up	up		6
TSPAN7	down	down		up		down		down		down		6
FBXO32	down			up			up	up	up	down		6
ADGRG4	down	down		down				down	down	down		6
KCNJ6	up	up	up				up	up	up			6
ERG	down	down		down		down		down	down			6
SVOPL	up			up	down	down			up		up	6
SLC34A2	up		down	down		up			down		up	6
WDR66	up		up	down			down		up	up		6
GALNT14	up	up		down	up			up	up			6
RHPN1	up	up				up	up	up		up		6
TMSB15A	up	up	up				up	down		up		6
COLEC12	down			up			up	down	down	down		6
HIST1H2BD	up	up	up	down				up	up			6
HIST1H4H	up	up	up				up	up	up			6
CPA5	up		up	down			up	up			down	6
SLAMF8	up	up	up		up	up				up		6
PLA2G2F	up	up	up	down				up		up		6
CHAF1B	up	up					up	up	up	up		6
ISL2	up	up			up		up	up	up			6
HSF2BP	up	up	up				up	up	up			6
C9orf116	up	up	down	down		up			down			6
TLCD1	up	up					up	up	up		up	6
MYL3	down	down	down	down				down	down			6
PPP1R35	up	up				up	up	up	up			6
CCDC155	up	up	up		up		up			up		6
GRASP	down	down		down		down		down	down			6
MSLNL	up	up			up	up		up		up		6
PRKAA2	down		down			down	up	up		down		6
AK4	down	down		down		down		up	up			6
RBP7	down	down	down			down	up			down		6
DRAXIN	up	up		up					up	up	up	6
B3GALT2	down			down	down	down			down		down	6
HFM1	down	down	down	down						down	down	6
DDR2	down	down				down		down	down	down		6
SPATA17	up	up			down		up			up	down	6
TEKT4	up	up			up	up		down	down			6
HPGDS	down					up		down	down	down	up	6
ALPP	up		up					down	down	up	up	6
DAPL1	down		down	up					up	down	up	6
DCST2	up				up	up	up	up	up			6
DCST1	up				up	up	up	up	up			6
TSACC	up	up					up	up	up	up		6
SGO2	up	up					up	up	up	up		6
PPM1L	down	down	down	up		down				down		6
PRICKLE2	down	down		down				down	down	down		6
PPM1K	down				down	down	down		down	down		6
CPA3	down					up		down	down	down	up	6
FBXO40	down	down	down	up		down					down	6
CDC25A	up	up					up	up	up	up		6
SPRY1	down	down	down		up				down		up	6
ASB5	down	down	down	up		down				down		6
RNF180	down	down	down				down		down	down		6
ANKRD55	down		down	down			down		down		down	6
TBX20	down	up	up				down		up	up		6
BMPER	down	down					down	down	down	down		6
SP8	up		up				up	up	up	up		6
GPR146	down	down				down	down	down	down			6
CA3	down	down	down	down				down	down			6
FREM1	down	down	down		down	down			down			6
TMEM71	down	down	down	down			down			down		6
LRFN5	down	down		up		up				down	down	6
ZCCHC24	down	down					down	down	down	down		6
DDIAS	up	up	up				up		up	up		6
NGB	up	up	up					up	up	down		6
RNASE7	up	down		up				up	up	down		6
ADAMTS15	down		up	down	down			down		down		6
AMN	up			down			down	up	up		down	6
CYYR1	down	down		down		down		down	down			6
RIC3	down	down	down				down	down		down		6
A2ML1	down	up	down					up	up	down		6
NAT16	up	up				up	up	up	up			6
PRR15L	up	up	down		down		up		down			6
CACNB3	up	up		up		up	up	up				6
TUBA1A	down				up	up		down	down	down		6
MFSD3	up	up		up	down			up	up			6
KLK5	up		up	down	down	down					up	6
TMEM88	down	down		down		down		down	down			6
TK1	up	up	up				up	up	up			6
GNG4	up	up		down			up	up	up			6
CX3CR1	down	down	down		up			down	down			6
KLHL30	down	down	down				up		down		up	6
WFDC12	up		up	down		up		down		down		6
AR	down		down			up	down		down	down		6
ARMC4	down		down	up		up		down	down			6
PCSK9	up		up		down	down				up	up	6
GCSAML	down					up	up	down	down	down		6
CXCL11	up	up	up	up	up					up		6
ADRB2	down	down		up				down	down	down		6
KCNAB1	down	down	down		up			down	down			6
TACR3	down	up		down	down	down					down	6
PCDH7	down		up		down	down		up	up			6
CALML6	up		down		up		up	up	up			6
MUC3A	up	down	up		up	up		up				6
PYDC1	up	up			up				up	up	up	6
ZFPM2	down	down					down		down	down	down	6
KRT86	up	up			up	up	up	up				6
LONRF2	down		down		down	down				down	up	6
COX7B2	up	up	up				up	up		up		6
FOXA3	up	up		down	down			up			up	6
GTSF1	up	up	up			up	up		up			6
CDCA4	up	up	up				up	up	up			6
DCDC1	up	up		down				down		up	down	6
PLAC1	up	up	up					up	up	up		6
[truncated: 10,038 more rows]

## Sheet: disconcordant DEGs
DEGs	BLCA	BRCA	HNSC	KICH	KIRC	KIRP	LIHC	LUAD	LUSC	STAD	THCA	Frequency
MIOX	up	up	up	down	down	down	up	up	up	up	down	11
MYBL2	up	up	up	up	up	up	up	up	up	up	down	11
CNTD2	up	up	up	down	down	down	up	up	up	up	up	11
ADGRB3	down	down	down	down	down	down	down	down	down	down	up	11
C14orf180	down	down	down	down	up	down	down	down	down	down	down	11
FXYD1	down	down	down	down	up	down	down	down	down	down	down	11
FHL1	down	down	down	down	up	up		down	down	down	down	10
ROS1	up	up	up	down	down	down	up		down	up	up	10
PITX1	down	up	down	up	up	up	up	up	up	down		10
CAMK2A	down	up	down	down	down	down	up	down	down	down		10
SMIM24	up		up	up	down	down	down	up	up	down	up	10
SALL4	up	up	up	up	up		up	up	up	up	down	10
EEF1A2	up	up	down	up	up	up	up	up	up		up	10
VSIG1	down	up	up	down	up	up	up	up		down	up	10
TNNT1	up	up	down		up	up	up	up	up	up	up	10
HRG	up		up	down	down	down	down	up	up	up	up	10
PTGFR	down	down	down		down	down	up	down	down	down	down	10
PLAU	up	up	up	down	down	down		up	up	up	up	10
APOC1	up	up	up	up	up	up		down	down	up	up	10
GCOM1	down	down	down	up	down	down		down	down	down	down	10
NTRK3	down	down	down	down		down	down	down	down	down	up	10
STRA8	up	up	up	down	up	up	up	up	up	up		10
FAM57B	up	up	down	up	up	up	up	up	up		up	10
SPARCL1	down	down	down	up	up	down	up	down	down	down		10
PDE1C	down	down	down	up		down	up	down	down	down	up	10
DRC7	up	up	down	down		up	up	down	down	up	down	10
EN2	up	up	up	down		up	up	up	up	up	down	10
SVEP1	down	down	down	up	down	down	down	down	down		down	10
PDZRN4	down		down	up	down	down	down	down	down	down	up	10
B4GALNT2	up	up	up		down	down	up	up	up	down	down	10
RSPO1	down	down	down	down	down	down		down	down	down	up	10
HPSE2	down	down	down	down	down	down		down	down	down	up	10
PRIMA1	down	down		down	up	down	down	down	up	down	down	10
LRRN4CL	down	down	down	down	up		up	down	down	down	down	10
C5orf46	up	up	down		up	up	up	up	up	up	up	10
LBX2	up	up	up	down	up	up		up	up	up	up	10
B4GALNT4	up	up	up	down	up	up	up	up	up	up		10
C1QL4	up		up	down	up	up	up	up	up	up	up	10
COL4A6	down	down	up	down	down	down	up		up	down	down	10
PLPP4	up	up	up		down	down	down	up	up	up	up	10
VIT	down	down	down	down	down	down		down	up	down	down	10
MYZAP	down	down	down	up	down	down		down	down	down	down	10
IL11		up	up	down	down	down	up	up	up	up	up	10
STRA6		up	up	down	down	down	up	up	up	up	up	10
SEMA3G	down	down	down	down	down	down	up	down	down			9
SPAG4	up	up		up	up	up	up	up	up	down		9
WISP2	down	down	down		up	up	down	down	down	down		9
CDH19	down		down	up	down	down	down	down	down	down		9
SPAG5	up	up	up			down	up	up	up	up	down	9
TREM2	up		up	up	up	up	up		down	up	up	9
MSLN	up	up		down	up	up		up	down	up	up	9
CNFN	down	up	down			up	up	up	up	down	up	9
SLC5A5	up	up	down		up		up	up	up	down	down	9
CA9	up	up	up	down	up	up	up	up	up			9
PTGDS	down	down	down	down	down		up	down	down	down		9
DKK1	down	up	up	down			up	up	up	up	up	9
CYP27B1	up	up	up		down	down	up	up	up	up		9
TNNC1	up		down	down	down	down	up	down	down	up		9
REEP6	up	up	down	down	down	down		up	up	down		9
PROC	up	up	up	down	down			up	up	up	up	9
ATP6V1B1	up		down	up	down	down	up		up	up	up	9
SLC8A2	down	up	up	up		up		up	up	down	up	9
LRAT	up		up	up	up	up	down	up	up	down		9
GJA3	up	up		down	down	down	up	up	up	up		9
COL10A1	up	up	up			down	up	up	up	up	up	9
TMEM74B	up			up	up	up	up	down	down	up	up	9
SIX1	up		down	up	up	up	up	up	up	up		9
AVPR2	down	down	down	down	down	down	up	down	down			9
MASP1	down	down			up	up	down	down	down	down	down	9
GAD1	up	up	up	up		down	up	up	up	up		9
FOXJ1	up	up	down	down	down		up		down	up	down	9
DUSP9	up		up	down	down	down	up	up	up	up		9
MYO18B	down	up	down	down	down	down	up	up	up			9
SAA2	up	down	down	up		up	down	up		up	up	9
EMX1	up	up	up		down	down	up	up	up	up		9
STAB2	down	down	down	up	up		down	down	down		down	9
GYPC	down	down	down	down	up	up		down	down	down		9
TRIM54	up		down	down	up	up	up	up	up		up	9
CYP1A1	up	down	down	up	down	down		down	down	down		9
P3H4	up	up	up	down		up	up	up	up	up		9
PNMT	up	up	down		down	down	up	down	down		up	9
RXRG	down	down	down			down	up	down	down	down	up	9
SCUBE3	down	up	up	down		down	up	up	up		down	9
FAXC	down			up	down	up	up	up	up	down	up	9
IGFBP3	up		up		up	up	down	up	up	up	up	9
SYTL5	up		down		down	down	down	up	up	down	up	9
JPH2	down	down	down	up	up	up		down	down	down		9
NR3C2	down	down	down	up	down	down	down		down	down		9
SLC24A2	up	up	up	up	down	down		up	up	up		9
DRC1	up		down	down		up	up	down	down	up	down	9
SLC30A2	up	up	down		down	down	up	up		up	up	9
CCDC78	up	up		up	up	up	up	down	down	up		9
NTNG1	down	up		down	down	down		down	down	down	down	9
MELTF	up			down	down	down	up	up	up	up	up	9
ESM1	up	up	up	up	up		up		down	up	up	9
ENPP6	down	down		down	down	down	up	down		down	down	9
DCSTAMP	up		up	up	up	up		down	down	up	up	9
VEGFD	down	down	down	down			up	down	down	down	down	9
TMEM100	down	down	down	down	up			down	down	down	up	9
C15orf48	up	up	down		up	up	up	up	up		up	9
KLK4	up	up		up	up	up	up		up	up	down	9
HIST1H1E	up	up	up	down	down	down	up	up	up			9
RAB3B	up		up	up	down	up	up	up	up		up	9
CST2	up	up	down		up	up	up	up		up	up	9
FRMD3	down	down	down	down		down	up	down	down		up	9
C11orf86	up	up	up	down	up	down		up		down	up	9
SPERT	up	up	up	down	down		up	up	up	up		9
DIRAS1	down		down	up	down		up	up	up	down	up	9
KCNJ10	up	up	up	down	down	down	down	up	up			9
ITLN1	up	down	down	down	down	down	down	down	down			9
TH	up	up	up	down	down		down	up	up		up	9
DDN	up	up		down	down	down	up	up	up	up		9
ODF3L1	down	down			up	up	down	down	down	down	down	9
RIPPLY3	up	up		down	down		up	up	up	up	up	9
CHST6	up	up	down	down	down	down	up	up			up	9
AHNAK2	down			up	up	up	up	up	up	down	up	9
PDIA2	up		up	down		up	up	up	up	down	up	9
SLITRK2	down	down	down	down	up		down	down		down	down	9
CFAP77	up	up	down	down	down	up		down	down		down	9
LRRK2	down		down	down		up	down	down	down	down	up	9
ALKAL2	down	down	down	down	up			down	down	down	up	9
KIAA0408	down	down	down		up	up		down	down	down	up	9
HCAR1	up		down	up	down	down	up	up	up	up		9
CFD	down	down	down	down	up			down	down	down	down	9
FCGR3A	up	up	up	up	up	up		down	down	up		9
C10orf55	up		up	down	down	down	up	up	up		up	9
ERVMER34-1	up		up	down	down	down	up	up	up	up		9
INMT	down	down	down	down			down	down	down	down	up	9
AC083902.2	down	up	down	down	down	down	up	up	up			9
LCN6	down	down	down	down		down		down	down	down	up	9
NEFL	up	up	up			up	up	up	up	down	up	9
AC007906.2	down	down	down	down	down		down	down	down		up	9
C6		down	down	up	up	up	down	down	down		down	9
TRPM5		up		down	down	down	up	up	up	up	down	9
CFAP61		up	down	down	down		up	down	down	up	down	9
CHGB		up	up		down	down	up	up	up	down	up	9
TBX15		down	down	up	up	up	down	up	up	up		9
SYNDIG1		up	up	down		down	up	up	up	up	down	9
TYRP1		up	down	down	down	down	up	down	down	up		9
PNCK		up	up	up	up	up	up	up	up	down		9
EGF		down	down	down	down	down	up	up	up	up		9
SLC5A2		up	up	down	down	down	up		down	up	up	9
PADI1		up	down		up	up	up	up	up	down	up	9
ETNK2		up	down	down	down	down		up	up	down	up	9
SLC5A12		up	up	down	down	down		up	up	down	up	9
AKR1C2		down	up	down		up	up	up	up	down	down	9
SAA1		down	down		up	up	down	up	up	up	up	9
LPL		down	down	down	down	down	up	down	down		up	9
ZNF781		down	down	down		down	up	down	down	down	down	9
SAA2-SAA4		down	down		up	up	down	up	up	up	up	9
GABRP			down	down	down	down	down	up	up	up	up	9
ZMYND10	up	up	down	down		up	up	down	down			8
CEACAM7	down	up	down	up	down		up	up	up			8
IYD	up	up	down		down	down	down	up	down			8
SYT7	up	up		up	down	down		up	up	up		8
HSD17B6	down	up	up	down			down	down	down	down		8
OTC	down	down	down	up				down	down	down	down	8
LMO3	down	down	down		down	down			down	down	up	8
KCNH2	down	up		up		up	up	up	up	down		8
LAMC2	up	down	up	down	down				up	up	up	8
RASGRF1	up	up	up	down			up	down	down		up	8
CDH3	up		up		down	down		up	up	up	up	8
CACNG4	up	up		down		down	up		down	up	up	8
NMRK2	down	down	down	up		up		down	down	down		8
SPAG6	up	up	down	down		up	up	down	down			8
ACTN2	down	up	down		up		up	down	down	down		8
ADCYAP1R1	down	down	down	up	up			down	down	down		8
CXCL2	down	down	down	down	up		down	down	down			8
ARG2	down			down	down	down	up	up	up	down		8
SLC4A11	up			down	down	down	up	up	up	up		8
CYP26A1	up			up	up		down	up	up	up	up	8
PALM	down	down	down	down	down	down				down	up	8
COCH	up		up	up	down		up	up	up	up		8
SIX4	up	up		up	down		up	up	up	up		8
NKAIN4	up	up	up	down				up	up	up	up	8
FERMT1	up		up		down		up	up	up	up	down	8
CST4	up	up	down			up	up	up	up	up		8
PCSK1N	up	up		down	down		up	up	up		up	8
RASL12	down	down	down		up		up	down	down	down		8
CA2	up		up	up	down		down	down		down	up	8
TRPA1	down	up	up	down	up	up		up	up			8
CALB1	up		up	down	down	down		up	up	up		8
CAV1	down	down	up	up	up			down	down	down		8
MEST	up	down	up	down	down			up	up	up		8
PRUNE2	down	down	down	down	up	up			down	down		8
NEURL1	down	up	down	up		down		up	up		up	8
RASD1	down	down	down	down	down	down	down	up				8
COL7A1	up		up	down			up	up	up	up	up	8
CCL20	up	up		down	up		up	up		up	up	8
IL1RL1	down		up	down	down	down	down	down	down			8
KMO	up	up	up	down		down	down	down	down			8
TBX4	down		up		up	up	up	down	down	up		8
DNAI1	up	up	down	down		up		down	down	up		8
NECAB1	down	down		down			up	down	down	down	down	8
HOXC11	up	up	up	down		up		up	up	up		8
APOBEC2	down		down	down			up	up	down	down	up	8
TREM1	up	up	up		up	up			down	up	up	8
PCSK2	down	up	down		down		down	up		down	up	8
BPIFB1	up	up	down	up	up		up		down		up	8
F10	down	down	down			up		down	down	down	down	8
PROZ	up	up			down	down	down		up	up	down	8
WNK4	up	up	down	down	down	down	up		up			8
PLA2G5	down	down		up	up			down	down	down	up	8
PLPPR3	up	up			up	up		down	down	up	up	8
TNNI2	up		down		up	up	up	down	down	up		8
MATN3	up	up	up				up	down	down	up	up	8
RHBG	up	up	down	up		down	up	up	up			8
DMGDH	down	down	down	down		down	down	up		down		8
SPINK5	up		down	up	up		up	up	up	down		8
TCN1	up		down		up	up		up	up	down	up	8
KCP	up			down		up	up	up	up	up	up	8
RDH5	down	down		down	up	up	down			down	up	8
FAIM2	down	up	down	down	down	down			down	down		8
DGKB	down	down	down	down	down	down			up	down		8
CTSV	up		up	down	down	down	up	up	up			8
LMX1B	up			down	down	down	up	up	up	up		8
GGH	up	up		down	down	down		up	up	up		8
UNC13C	up	down	down		down	down			up	down	down	8
DNASE2B	up		down	up	up	up		down	down	up		8
CGREF1	up	up		down	up	up	up	up	up			8
CYP2C9	up		down	down		up	down	up	up	down		8
CYP1A2	up	down	down	up		down	down	down	down			8
CFAP74	up			up	up	up		down	down	up	up	8
MYOM3	up		down	down			up	up	up	up	up	8
NECTIN4	up	up		down	down	down		up	up		up	8
LHX9	up	up	up	up	up	up			down	up		8
PPFIA4	up	up	down	down	up		up	up	up			8
CNGA3	down	up	down	down	down			up		down	up	8
CCDC150	up	up	up	down	up			up	up	up		8
HAPLN1	up	up	up		up		up		up	down	up	8
LGSN	up	up		down	down	down		up	up	up		8
ATP6V0D2	up		up	up		down	up	down	down	up		8
SAA4	up	down	down		up	up	down	up		up		8
CNTN5	up	up	up	down	down	down			up		down	8
DLG2	down	down	down	up		down	down			down	down	8
ZNF385D	down		down	down	down	down	up		down	down		8
TDO2	up	up	up	up	up		down	up			up	8
HSPB8	down		down		up	up	up	down	down	down		8
LPCAT1	up	up	up		up	up	up		down	up		8
PLEKHG4B	up		up	down	down		up	up	up		down	8
ANKRD29	down	down		up		up	up	down	down		down	8
ANGPT1	down	down	down	up		down		down	down	down		8
ENPP3	down		down	down	up	up		up		down	up	8
WNT7A	up		up	down	down		down	down	down		up	8
RAET1L	up	up		down	down			up	up	down	up	8
IGF2BP1	up	up	up	down			up	up	up	up		8
SIM2	up	up	down	down	down	down		up	up			8
SCUBE1	down		down		down	down	up	down	down	down		8
TFF2	up			down	up	down		up	up	down	down	8
LY6K	up		up		down	down	up	up	up		down	8
LY6E	up	up	up	down	up		down			up	up	8
AKR7A3	up	up		down	down		down	up	up	down		8
TDRD5	up		up		down	down	up	up	up	up		8
KIF26B	up	up	up		down		up	up	up	up		8
PKDCC	down	down		up		up	up		down	up	down	8
ACTG2	down	down	down		up		up	down	down	down		8
CCDC141	down	down	down		up		down	down	down		down	8
AIM2	up	up	up		up	up		up	up		down	8
ALB	up		up	down	down	down	down	up		up		8
RAET1E	down		down	down	down	down	up			down	up	8
CFAP47	up	up	down	down			up	down		up	down	8
C9orf84	up		up	up	down	down	up	up	up			8
CFL2	down	down	down	up			down	down	down	down		8
WDR72	up	up			down	down		up	up	up	down	8
SCNN1G	up		down	down	down	down		down	down	down		8
TMEM92	up	up	up		up	up		up		down	up	8
JSRP1	up	up	down		up	up		up	up	down		8
PHYHIP	down	down	down	down	down				down	down	up	8
BNC1	up	down	up			up	down		up	down	up	8
NLGN1	down	down		down	up	up	up			down	down	8
HSPB2	down	down	down		up	up		down	down	down		8
HOXB9	up	up	up		down		up	up	up	up		8
APLN	up		up		up		up	down	down	up	up	8
KRT20	up	up			up	up	up	up	up	down		8
LRRC15	up	up	up	up				up	up	up	down	8
SYT12	up		up	down	up	up		up	up		up	8
ADGRE1	up		up	up	up	up	down	down	down			8
APOBEC3B	up	up	up				up	up	up	up	down	8
C1orf194	down	up	down	down		up		down	down		down	8
TMEM252	down	down	down	down		up		down	down	down		8
SYNM	down	down	down	up	up			down	down	down		8
CACNB4	down		down	up	down	down	up	down	down			8
CAPN12	up			down	up	up	up	up	up	up		8
NEB	up		down	down		down	up	up	up	up		8
PRR36	up	up			down	up	up	up		up	up	8
BMP8A	up	up	up		up			up	up	up	down	8
MAP7D2	up		up	down	up		up	up	up		up	8
PROS1	down	down		down	up		down	down	down		up	8
CEND1	down	up	up	up			up	up	up	down		8
SRL	down	down	down	down	down			down	down		up	8
KCNQ5	down	up		up	up	up		up	up	down		8
LEMD1	up		up	down		up		up	up	up	up	8
FOXD2	up	up	up	down			up	up		up	up	8
FOXE3	up		up	down	down	down		up	up	up		8
LCN10	down	down	down	up		down			down	down	up	8
IGFL1	up	up		down		down		up	up	down	up	8
IER5L	up	up	up	down				up	up	up	up	8
SHISA6	down		down	down	down	down	up		up		up	8
HMX2	up	up	up	down	down	down		up	up			8
ENTPD8	up	up	down	down	down			up	up		up	8
RELN	down	down	down	down	down	up				down	down	8
PLEKHG4	up			down	up		up	up	up	up	up	8
CTSE	up	up	up	down	up	up			down	down		8
CPNE4	up		down	down	down	up		up	up		up	8
COL27A1	up		up	down	up	up			up	up	down	8
IL27	up	up	up	up	up			down	down	up		8
SLC28A3	up	down	up			up		up	up	up	up	8
ELOVL2	down	up	up	up	up	up		up	up			8
CACNA1E	up	up		down		down	up	up	up	up		8
PEG3	down		down		down	down	up	down		down	down	8
SLC34A3	up	up	down	down	down	down	up	up				8
ABCA4	up		up	down	down	down		up	up	down		8
PSORS1C2	up	up	down		up	up		up	up		up	8
PRSS1	up	up	down	up			up	up	up		up	8
MT1H	up	up		down	down	down	down	up	up			8
C15orf59	down	up	down	up		down	up	down		down		8
DIO1	up	up	down	down	down	down			down		down	8
UBD	up	up			up		up	up	up	up	down	8
FER1L6	up	up	down		down	down	up		up		down	8
EBF2	down	down	down	up	up	down	up		down			8
TINCR	up	up		down	down			down	up	down	up	8
AKAP2	down	down		up		down		down	down	down	down	8
AL096711.2	down	down			up	up		down	down	down	up	8
GDF10	down	down	down				up	down	down	down	down	8
GABRQ	up	up		down	up		up	up	up		up	8
ERVV-2	up	up	up	down		up		up		up	up	8
ERVV-1	up	up	up	down				up	up	up	up	8
LHX1	up	up	up		down	down		up	up	up		8
HIST1H2BE	up	up	up	down	up		up	up	up			8
CCL18	up			up	up	up		down	down	up	up	8
ADRB1		down	down	up	down	down	down	down	down			8
SYT1		up	up	down	down	down		up	up		up	8
MYO3B		up	up	down	down	down		up	up		up	8
LAMP3		up	up	up	up			down	down	up	up	8
CEACAM6		up	down			up	down	up	down	up	up	8
CPA1		down		down	down	down	up	down	down	down		8
MET		down	up	up	up	up		up		up	up	8
SLC6A4		up	down	up	down	down		down	down	down		8
CLIC5		down	down	down	down	down	up	down	down			8
RBP2		up		down	down	down	up	down	down	down		8
DNAH6		down	down	down			down	down	down	up	down	8
TPO		down	down		up	up		up	up	down	down	8
PCDH17		up	up	up	up		up	down	down		up	8
TEX11		up	up	down	up	up	up	up	up			8
PCK1		down	down	down	down	down	down	up		down		8
KIRREL2		up	up	down	down	down	up	up	up			8
MGAT3		down		down	up	down	up	down	down		up	8
KRT17		down	up			up	up	up	up	up	up	8
SLC7A10		down	down	down		down	up	up	up	up		8
KL		down		down	down	down		down	down	down	up	8
SUSD4		up		down	down	down	up		up	down	up	8
TRPM8		up			up	up	down	up	up	up	up	8
DCDC2		down	down	down	down		up	down	down	up		8
VIP		down	down	down	up	down		down	down	down		8
GSDMC		up		up	up	up	up	up	up	down		8
ADGRF4		up		down	up	up	up	up	up		up	8
WIF1		down		down	down		up	down	down	down	up	8
DGKI		down	up	up		down	up	up	up		down	8
CLDN14		up	up	down	down	down		up		up	up	8
NPHS1		up	up	down	down	down	up	up			down	8
ZG16B		up	down	up	up	up	up	up	up			8
SLC1A7		down	down		up		up	up	down	down	down	8
AXDND1		up	up	down	down	down	up		up	down		8
BNIPL		up	down	down	down	down	up			down	up	8
FBP1		up		down	down	down	down	down	down	down		8
ARMC3		up	down	down		up		down	down	up	down	8
GLYATL1		up	down	down	down	down	down	up	up			8
CA4		down	down	down	down	down	up	down	down			8
GDNF		up	up	down	down	down		up	up		up	8
PLA2G4F		up		up	down	down	up	down	down		down	8
MUC15		down	down	down	down	down	up		down	down		8
CLIC3		up	down		up	up	up	down	down	down		8
OSCAR		up	up		up	up		down	down	up	up	8
SOSTDC1		down		down	down	up	up	down		down	down	8
KRT15		down		down	up	up		up	up	down	up	8
RXFP1		up	up	down		down	down	down	down		down	8
C2orf54		up	down	down	down	down			down	down	up	8
ISX		up		down	down	down	up	up	up	up		8
HTR1D		up	up	down		up	up	up	up		up	8
CFAP65		up	down	down		up	up	down	down	up		8
PLCXD3		down	down	up	down	down	down		down	down		8
MCEMP1		up	up		up	up		down	down	up	up	8
CCBE1		down		up	down	down	down	down	down		down	8
WT1		up	up	down	down	down	up			up	up	8
NAT8L		down	down		down	down	up	up	up		up	8
CD300LF		up	up	up	up	up		down	down	up		8
FAM183A		up	down	down	up	up	up	down	down			8
PLEKHN1		up	down		up	up	up	up	up		up	8
PERM1		up	down		up	up	up	up	up		up	8
P2RX2		up	down		down		up	down	down	down	down	8
SPTSSB		up	down	down	down		up	up	up	down		8
C6orf141		up	up	down	up	up		up	up		down	8
CYP2B6		up	down	down	down	down	down	up		up		8
ADAMTSL2		up	up	down	down	down	down		down	up		8
CNGA1		down	down		down	down	down	up	up	down		8
LRRC10B		up	down	down		down	up	down	down	down		8
ADH1C		down			down	down	down	up	up	down	down	8
CDH10			down	down	down	down	up	down	down	down		8
SLC9A3			down	down	down	down	up	up	up	down		8
NOX4			up		down	down	up	up	up	up	up	8
ISM2			up	up	down	down	up	up	up	up		8
KRT23			down	down	down	up	up	up	up	up		8
SLPI			down	down	down	up		down	down	down	up	8
HOXD10			up	down	down	down	up		up	up	up	8
RHCG			down	up	down	down		up	up	down	up	8
SH3GL3			down	down	down	down	up	down	down	down		8
SLC2A5			down	down	up	down	up	up	up	down		8
SLC5A11			up	down	down	down	up	up	up	down		8
COX6B2			up	down		up	up	up	up	up	up	8
KLHDC8A			down		up	down	up	up	up	down	up	8
MOGAT2			down	down	down	down	down	up	up	down		8
CHRM1			down	up	down	down		down	down	down	down	8
MFSD4A			down	down	down	down		up	down	down	up	8
ATP2A1			down	up	up	up	up	up	up	up		8
CAPN8			down	down	down	down	up	up	down		up	8
FLRT1				down	down	down	up	up	up	down	down	8
CYP17A1				down	down	down	up	down	down	up	down	8
CHODL				down	down	down	up	up	up	down	down	8
AOC1	up	up		down			down	up	up		up	7
DBNDD1	up	up	down			up	up	up	up			7
ARX	up	up	down		up	up		up			up	7
CNTN1	down		up	down	down	down			up	down		7
SLC7A9	up			down	down	down		up	up	down		7
KCNG1	up	up		up		down	up	up	up			7
HOXC8	up		up	down			up	up	up	up		7
ARHGAP6	down	down	down	up				down	down		down	7
PTPRN	up		up		up	up		up	up	down		7
ARSF	down		down	down		down		down		down	up	7
MPPED2	down				down	down	up		up	down	down	7
CLDN18	up	down	up	down			up	down	down			7
RASGRP2	down			down	up			down	down	down	down	7
CDHR2	up	up	up	down			down	up		down		7
ATP12A	up		down	down	down	down				down	up	7
MCAM	down	down			up		up		down	down	up	7
PPP1R12B	down	down	down	up		down			down	down		7
FBLN1	down			down	down		up	down		down	down	7
ADCY2	down		down	down	up	up			up	down		7
BPIFB2	up	up	down	up			up	up		down		7
PGR	down		down	up		down		down	down	down		7
IGSF9	up	up			down	down		up	up		up	7
TMPRSS11E	down		down	up				up	up	down	up	7
SMPX	down		down	up			up	up	up	down		7
TPSD1	down				up	up		down	down	down	up	7
CABP7	up	up	up				up	up	up	down		7
CTSG	down	down	down					down	down	down	up	7
VSX1	down			up	up	up	up	up	up			7
SPEF1	up	up		down		up	up	down	down			7
RSPO4	up				up	up		down	down	up	up	7
TGM5	down		down	down	up			up	up	down		7
EYA1	down		down	down	up		up		up		down	7
DHDH	up	up		down		down	up			down	up	7
CKM	down		down	down	down	down		up		down		7
ICAM5	up		up	up			up		down	up	up	7
ATP1A3	up	up	down	up	up	up		up				7
CCDC114	up	up	down	up			up	down	down			7
ATP6V0A4	up		down	up	down	down		up			up	7
MEOX2	down	down	down		up		up		down		down	7
LHX2	up	up				up	down	up	up	up		7
TLX1	up	up	down				up	up	up	up		7
HGFAC	up	up		down		up	down	up	up			7
PPARGC1A	down	down	down	up	down				down		down	7
CRYAB	down	down	down			up		down		down	down	7
VWF	down	down		up	up		up	down	down			7
SLC6A12	up		up	down	down		down	down	down			7
GYS2	down	down	down			up	down			down	down	7
RBM24	down	up	down	down			up			down	down	7
SIM1	up	down	down		down	down	up	up				7
WISP3	up		up	down			down	up	up	up		7
LAMA4	down	down		up	up	up	up		down			7
HAVCR1	up			down	up	up	up	up		up		7
C9	up		up	up		down	down		up	up		7
KNG1	up			down	down	down		up		up	up	7
BCHE	down		up	down		up	down	down		down		7
LRRC31	up	up	down	up		up		up	down			7
GRB14	up	up	down	up	down	down		up				7
TACR1	down	down	down	down	down	down	up					7
REG1A	up		up	down	up		up	up	up			7
GNLY	up		up	up	up	up			down		up	7
TPSG1	down	up		down	up		up		down	down		7
AGMAT	up	up		down	down	down		up	up			7
ST6GALNAC5	down			down		up	up	down	down		up	7
PROX1	down	down		down	down	down				up	down	7
APOA1	up	up		down			down	down	down	down		7
TTR	up		down	up		down	down	up			up	7
FILIP1	down	down	down		up			down	down	down		7
SLC16A7	down	down	down	up	down	down				down		7
PPL	down	down	down	down	down					down	up	7
C10orf95	up	up	down		down		up		down		up	7
MYOT	down		down	up	up		down			down	down	7
CRY2	down	down	down	up				down	down	down		7
NUDT10	down			down	down	down	down		up	down		7
ITIH5	down	down				down	up	down	down	down		7
ARHGAP40	up			down		up	up	up	up		up	7
MT1G	up	up		down	down	down	down			down		7
C3	down	down	down		up	up			down		up	7
LRRN4	up		up	down		up			down	up	up	7
CFP	down	down	down		up		down	down	down			7
BEST3	up		down	down		up		up	up	up		7
RASL11B	up	up	up	down	down	down			up			7
FLNC	down	down	down			up	up			down	down	7
LRRC4	down			up		down	down	down		down	up	7
CHAC1	up	up		up	down	down		up	up			7
CDH15	up	up	down	up		down		up			up	7
LBP	up		down	down	up			up	up	up		7
EPO	up	up	up	down	up	down			up			7
GATA5	down	up		down	down	down		down	down			7
HSD17B3	up				up	up	up		up	up	down	7
BPIFA2	up	up	down	up			up	up		up		7
CKMT2	down	down	down	up		down			down	down		7
BHMT2	down	down	down	down		down		up		down		7
SEC14L4	up	up		down				down	down	up	up	7
MYCN	up	up			down	down	up	up	up			7
ANXA1	down	down	down		up	up				down	up	7
FAM189A2	down	down	down	up				down	down	down		7
ALDOB	up	down		down	down	down	down			down		7
OIT3	up	up		down		down	down		down		up	7
CILP	down		down		down		down	up	up	down		7
KIAA1644	down	up	up	up	up			up		down		7
LGR5	up			down	down	down	up		up	up		7
GALNT6	up	up	up	down	down			up	up			7
SYT16	up		up			up		up	up	down	down	7
RDH12	up			down	down	down			up	down	down	7
FGF7	down	down	down	up		down			down		down	7
GCNT3	down		down	down	down		up	up	up			7
ST8SIA2	up	down	up	down				up	up		up	7
LRRC46	up	up	down			up		down	down	up		7
SLC13A5	up		up	down	down	down		up	up			7
GRB7	up	up		down	down			up		up	up	7
ECM1	down	up	down				down	up		down	up	7
LYG1	up			down		up	up	up	up	up		7
AFF3	down		down	down	up			down	down	down		7
EPHA5	down	down	down		down		up			down	down	7
OCIAD2	up	up	up	down		up		up	up			7
GLRA3	up		up	up	down	down		up	up			7
PLA2G7	up		up	up	up	up				up	down	7
RASGEF1C	down			down	up	up		up	up	down		7
MLIP	down	down	down	up	up				up	down		7
IGFBP1	up	down			up		down	up		up	up	7
SSC4D	up			down	down		up	up	up	up		7
PMP2	down	down	down		down				up	down	down	7
FAM135B	down	up	down			up	up			down	down	7
FAM13C	down	down	down	up				down	down	down		7
HABP2	up			down	up	up	down	up	down			7
FXYD4	up		down	down	down	down		up	down			7
FCGR1A	up	up		up	up	up			down	up		7
ITPR1	down		down	up		down			down	down	down	7
ENKUR	up	up		down	up			down	down		down	7
GFRA1	down	up	down					down	down	down	down	7
PIEZO2	down		up		up		up	down	down		up	7
SLC28A1	up		down	down	up		down	up		down		7
CXCL13	down		up	up	up			up	up		down	7
PPP2R2B	down	down		down	down	down			up	down		7
LRFN2	up	up	down	up			up	up	up			7
KCNB1	down	down	down	down	up				down	down		7
NRG2	down	down	down	up			up		down	down		7
DNAH3	up	up	down			up	up		down	up		7
STARD9	down	down		up	up			down	down	down		7
COX7A1	down	down	down	up				down	down	down		7
FAM171A2	up	up			down		up	up	up		up	7
KCNT2	down	down	down	down		up		down	down			7
CADM3	down	down			up	up			down	down	up	7
PM20D1	up	down		down	down	down			down	down		7
LRRTM1	down		down	up		down		up	up	down		7
DPPA2	up		up	down	down			up	up	up		7
NKX6-1	up	up	up	up				up	up	down		7
C3orf67	up	up			up	up		up	up	down		7
CXCL5	up				up	up	up		down	up	up	7
GRIK3	down		down	up	up		down			down	up	7
PITX2	down		down		up	up	up	up	up			7
CDC20B	up	up		up	down	down	up			up		7
CAGE1	up		up	down			up	up	up	up		7
SBSPON	down			down			up	down	down	down	down	7
CPA6	down	up	up	up	up		up		up			7
RNF183	up		down	down			up	up	up		up	7
CLDN2	up	down		down				up	down	up	up	7
GJB2	up	up			up		down	up	up	down		7
TMEM63C	up	up		up			up	up	up	down		7
TMEM52B	up	up	up		down	down	up			up		7
LARGE2	up		up		down		up	up	up	up		7
AVPR1A	down	down		up		down	down			down	down	7
CLEC3A	down	up		down	down	down			up	down		7
MS4A15	up	up	up					down	down	down	up	7
AQP2	down		down	down	down	down			down	up		7
DNAAF3	up	up		down		up		down	down	up		7
KLK2	up	down		up	up		up			up	down	7
KLK6	up			down	down			up	up	up	up	7
KLK13	up		down	up	up				up	down	up	7
CA7	up		down	up				up	up	down	up	7
STXBP6	down	down	down	up			up	down	down			7
PARM1	down	down	down		down	down	up		down			7
P2RY12	down	down			up	up	down	down	down			7
MYRIP	down	down	down	up				down	down	down		7
CST5	up	up	down					down	down	up	up	7
KRT78	down	up	down					up	up	down	up	7
SLC23A1	up	up		down	down	down			down	down		7
FGB	up			down	up		down	up	up	up		7
NMUR1	down	down			up		down	down	down	down		7
ANO5	down		down	up	down				down	down	down	7
ZNF556	up			up	down		up	up	up	up		7
TPSAB1	down				up	up		down	down	down	up	7
CLEC12A	up		up		up	up	down	down	down			7
RCAN2	down	down	down	up		down			down	down		7
SNTG2	down	down	down			up		down		down	down	7
COL6A5	down	up			down			down	down	down	up	7
MYEOV	up	down			up	up		up	up		up	7
OLR1	up	up	up				up	down	down	up		7
CSPG4	down		up	up	up		up			down	up	7
HAP1	up	down	up		down			up	up		down	7
2018-03-10	up	up		up	down	down			down		up	7
SLCO4C1	up		down	down			down	down	down		up	7
GOLGA8A	up	down			up	up	up		up		up	7
CATSPER1	up	up			up	up	up		down		up	7
C11orf16	up	up			down	down		down	down	up		7
TCIM	down			down	down	down	down		down		up	7
C8G	up	up		up	up			up	up	down		7
SCN4B	down	down			up		up	down	down	down		7
ZBED2	up	up				up	up	down	down	down		7
RPRM	down		down	down	down	down			up	down		7
GLDC	up	up		down	down			up	up		down	7
RNF186	up	down	down	down		down		up		down		7
APOLD1	down	down	down		up	down		down	down			7
FAM133A	up		up	down			up	up	up	up		7
ALOX15B	down				up	up	up		down	down	up	7
CYP8B1	up			down	down	down	down	up			down	7
SLC47A2	up	down	up	down	down		up		up			7
ATG9B	up	up		up	up			up	up	down		7
RGMA	down	down	down			down	up		up	down		7
PCP4	down		down	up	down		up	up		down		7
FREM3	down	down			down	down		down	down		up	7
TNFAIP8L3	down		down	up				down	down	down	down	7
NPBWR1	up		up			up	down	up	up		up	7
SLC35F3	up	down		up	up			up	up		up	7
C1QTNF12	up		up	down			up	up	up		up	7
ANKS1B	down		down	down			up		down	down	down	7
MORN5	down		down	down		up		down	down	down		7
SLC51B	down	down	down		down		up		down	down		7
KRT16	up	up			up			up	up	down	up	7
QRFPR	up		up		up	up		down	up		up	7
ESPN	up	up		down		down		up	up		up	7
TMPRSS6	up	up			up	up		up		down	up	7
FOXD3	down	up	up					up	up	down	down	7
SMTNL2	down		down	down	down		up	down	down			7
SBK1	up	up			down	up		up	up	up		7
PLAC9	down	down	down		up			down	down	down		7
MYT1	up	up	up	down			up	up	up			7
KIF19	down		down		up		down	down	down		down	7
GIMAP5	down	down		down	up	down		down	down			7
CGB7	up	down	up		up			up	up		up	7
S100A5	up				down	down		up	up	up	up	7
SERPINA1	up			down	up	up	down		down		up	7
TPSB2	down				up	up		down	down	down	up	7
CFAP43	up		down	down				down	down	up	down	7
FAM212B	down	down				down	up	down	down	down		7
SULT1C4	down	down		down		up		down	down		down	7
EPS8L3	up		down	down	up	up	up	up				7
RASGEF1A	up		up	down			up	up	up	up		7
ZYG11A	up	up		down	down	down		up	up			7
SPDYC	up	up	up		down			up	up	up		7
IGFL4	up			down		up		up	up	up	up	7
AARD	down	up	down	down				down	down	down		7
TMEM213	up	down	down	up	down	down			down			7
PLXNA4	down	down		down	down	down			down		up	7
CYP21A2	down	up	down	down	up	up		up				7
ARHGEF38	up		down		down		up		down	up	up	7
AQP1	down	down	down	down				down	down		up	7
SPRR2A	up		down	down	down			up	up	down		7
APELA	up		up	down	down			up	up	up		7
ECSCR	down	down	down		up	down		down	down			7
PCDHGB7	down	down		down	up			down	down	down		7
AL163636.2	down	down	down	down	up		down		down			7
TCF24	up	up	up		down	down		up	up			7
ZNF728	down	down	down		down	down	up		down			7
ZBTB8B	up			down	down			up	up	up	up	7
SRD5A2	down	up	down	down	down		down		down			7
SLC4A1		down		up	down	down	down	down	down			7
TENM1		down	up		up	up		up		down	up	7
HHATL		down	down	up	up	up			down		up	7
SLC11A1		up	up		up	up		down	down	up		7
MARCO		down			up	up	down	down	down		up	7
FSTL4		up			down	down	up	up	up		up	7
BCAS1		up	down	down	down		up	up		down		7
COL17A1		down	up	down		up		up	up	down		7
PLA2G10		up		up	up			up	down	down	up	7
PPP2R2C		up			up	up	up	up	up	down		7
SNCB		up		up	up	up		up	up	down		7
CA12		up		up		down	up	up	up		up	7
DUSP13		up	down				up	up	up	down	up	7
WNT11		down			down	down	down		up	up	down	7
MT3		up	down	up	up		up		up	down		7
TESC		down	down	down		up	up	up			up	7
SLC7A8		up	up		down	down	down		up	down		7
TYRO3		down	down	down	down	down	up				up	7
CBARP		up		up	down	down		up	up		up	7
SLC5A4		down			up	down	up	down	down	down		7
SLC52A3		up			down	down	up	up	up		up	7
PAK5		down		up		down	down	down	up		down	7
UPK1A		up	down	down	down		up	up		down		7
AGR2		up	down	down	down		up	up			up	7
ALDH3A1		down	down			up	up	up	up	down		7
CWH43		up		up	down		down	down		down	down	7
NMU		up	down		up	up		up	up		up	7
TRIM2		down	down	up	down	down		up	up			7
PRMT8		up	up	up	down	down			down		up	7
PACRG		down	down	up		down		down	down	down		7
UNC5A		up		up	up	up	up			up	down	7
FNDC4		down	down			up	down	up		down	up	7
NT5C1A		down	down		down	down		up		down	up	7
CHRNB4		up	up				up	up	up	down	up	7
MUC5B		up	down	up	up		up	up		up		7
CNR1		down			up	up	up	down	down	down		7
KLHL31		down	down	up	up	up	up		up			7
PZP		down	down	down	up		down	down	down			7
CCL25		up		up	up		up	up	up	down		7
TNS4		down		up	down	down		up	up	up		7
WDR38		up	down	down		up		down	down		down	7
IGFBPL1		up	up	down			up	up	up		down	7
TMPRSS4		up		down	down	down		up	up		up	7
BMPR1B		up	up	up	down	down	down			down		7
ERP27		up		up	down	down	up		down		up	7
PIK3C2G		down	down		down	down	down		up		down	7
ASCL1		up	down	up	up	up		up	up			7
SORD		up		down	down	down	down	up	up			7
ADAMTS18		down			up		up	up	up	up	up	7
CRABP2		up		down		down		up	up	down	up	7
OSR1		down	down	down		up	up		down		down	7
NKD2		up	up	up	up			down		up	up	7
DNAJC5B		up		up	up	up		down	down	up		7
DPYS		down		down	down	down	down		down	up		7
SHC3		down			down	down	up	down	down		up	7
GRIK4		up		down	up		up	down	down		down	7
CDH8		down		up	up		up		up	down	up	7
THRSP		down	down	up		down	down			down	up	7
GAL3ST2		up		down	down		up	up	up	up		7
AFF2		down	up	down	up	up	up				up	7
LAD1		up		down	down	down		up	up		up	7
CLIC6		up	down	up		up	down	up		down		7
PLA2G4D		up		up	up	up		up	up	down		7
TFF3		up	down	down		down	up	up			down	7
TFF1		up	down	down				up	up	down	down	7
ALPL		down		down		down	down	down	down		up	7
C1orf115		down	down	down				down	down	down	up	7
PIGR		down	down	down	down	up			down	down		7
CAPN13		up	down	up		down	up	up		down		7
CFAP221		up	down	down	down				down	down	down	7
CLDN19		down	up	down	down	down	up	down				7
NPY1R		up	down	down	down	down	down		down			7
F2RL2		up	up	down				up	up	up	up	7
NELL1		up	down	down	down	down		up	up			7
LMO1		up	down	down		down		up	up	down		7
ELFN2		up	up			up	up		down	up	up	7
MS4A14		up	up	up	up	up		down	down			7
LOXHD1		down		up		down	up	down	down	up		7
CORO6		up	down		up	up	up		up	down		7
PSCA		up	down		down		up	up		down	up	7
ANGPTL4		down		down	up	up		up		down	up	7
EVPL		up	down	down	down		up			down	up	7
SLC22A11		down	up	down			up	up	up	up		7
NPNT		up	up		down	down	up	down	down			7
ZBBX		up	down	down		up		down	down	up		7
GP2		up	down	down	down	down	up	up				7
FABP4		down				down	up	down	down	down	down	7
IRX1		down		down	down	down		down		down	up	7
CDH2		up	up	down	up	up		up			up	7
CEL		up		up	down	down	up	up	up			7
FUT3		up	down	down	down			up	up		up	7
PAH		up		down	down	down		up	up	up		7
SCG2		up			up	up	up	up	up	down		7
IL17D		down	down	up			up	down	down	down		7
ABLIM3		down	down		up		down	down	down	down		7
PC		down		down	down	down		up	up		up	7
MUC13		up	down	down	down	down	up	up				7
SLC16A11		down	down	up		down	up	down	down			7
BRSK2		up	up		up		up	up	up		down	7
TMEM270		up		down		up	up	up	up	up		7
DOK7		up	down		down		up	down	down		up	7
PLEKHD1		up	down	up	down	down				up	down	7
CRYBG2		up	down	down			up		up	down	up	7
FUT2		up	down		down		up	up	up		up	7
TUBAL3		up		down	down	down		up	up	down		7
PLD5		down	down	down	down			up		down	down	7
USH1G		up		down		up	up	up	up	down		7
IDH2		up	down	up	down	down		up	up			7
PTGDR2		down	down	down			up	down	down	down		7
EMILIN3		down		down	down	down			up	down	up	7
TMPRSS2		down	down	up	down	down	down		down			7
CLCNKB		down	down	up	down	down			down		down	7
DLK1		down	down	down	down		up	up	up			7
GLDN		down		up		up	up	down	down		up	7
AKR1C1		down	up			up		up	up	down	down	7
TPRG1		up	down	up	up			down		down	up	7
GJB3		up		down		up	down	up	up		up	7
S100A14		up	down	down	down		up		up	down		7
CXCL17		up	down		down		up		down	down	up	7
SPOCK3		down		down	down	down			up	down	up	7
AKR1C3		down	up	down			up	up	up	down		7
SLC6A17		up		up	down	down	up	up	up			7
OGDHL		up		up	down		down	up	up		down	7
MAP1LC3C		down	down			up		down	down	down	down	7
PRB3		up	down	up				up	up	up	up	7
PAX9		up	down			up		up	up	down	up	7
SOWAHA		up	down		down	down	up		up	down		7
CCNI2		up			down	down	up	up	up	up		7
RNF223		up	down	down	down	down				down	up	7
TDGF1		down	down		down	down	up		down		down	7
HP		down	down		up		down		down	up	up	7
MGAM2		down	down	down	up		up		up		down	7
AC010616.1		up	up		up	up	up	up			down	7
HOXA11			up		down		up	up	up	up	up	7
CCL26			up	down			up	up	up	up	up	7
FMO1			down	down			up	up	up	up	down	7
EYA2			down	down	down		down	up	up	down		7
RBFOX1			down		down	down		up	up	up	up	7
CLUL1			down	down	down	down	up			down	down	7
CACNA1S			down	down	down	down	up	down	down			7
SEMA5B			up	down	up	up	up		up	up		7
SULT2B1			down	down	down	down	up			down	up	7
DOCK3			down	up	down		up	up	up	down		7
TMEM40			down		down		up	up	up	down	up	7
MYH7			down	down	down	down			up	down	down	7
RASD2			up	up	up		up		up	down	up	7
AQP9			up		up	up		down	down	up	up	7
PDE4C			down	down		down	up		down	down	up	7
PKD2L1			up	up	up	up		down		up	up	7
CYP2C18			down	down	down		down	up	up	down		7
KIAA1549L			up		down	down		up	up	up	up	7
ELOVL4			down	up			up	up	up	down	up	7
PIWIL1			up	down		down		up	up	up	up	7
AIF1L			down	down	down	down	up			down	down	7
TSPAN8			down	down	down	down	up	up			down	7
C1QL1			up		up		up	up	up	down	up	7
PPP1R1B			down		down	down	up		down	up	up	7
ITGB4			up	down		up	up	up	up		up	7
CLDN10			down	down	down	down		up	up		up	7
ELF5			down	down	down	down			down	up	up	7
SERPINE2			up	down	up	up	up	up	up			7
SCEL			down	down		up		down	down	down	up	7
MMP7			down	down		up		up	up	up	up	7
BTBD16			up	down	up	up		up	up	up		7
CYP4B1			down		down	down		down	down	down	up	7
MUC4			down	up		down		up	up	up	up	7
BHMT			up	down	down	down	down	up	up			7
CXCL14			up	down			down	up	up	down	up	7
LCN2			down	up	down	up	up	up			up	7
OLAH			down	down	down	down	up		down		up	7
DNAAF1			down	down		up	up	down	down		down	7
FTCD			up	down	down	down	down	up	up			7
AZGP1			down		down	down	down	up	down		down	7
HK3			up		up	up	down	down	down	up		7
COL26A1			up	down	down	down			up	up	up	7
SLITRK5			down	down	up	up	up			down	down	7
SLC16A9			down	down		down	up	up	up	down		7
RRAD			down		up	up		down	down	down	down	7
GPT			down	down		down		up	up	down	up	7
SOST			up	down	down	down		down	up		down	7
ALX1			up	down	down		up	up	up	up		7
TNFSF15			down	up	down		up		down	up	up	7
NRG3			down	up	up	up		down	down	down		7
VSIG10L			down	up		up	up	up	up	down		7
TRABD2A			up		up	up	up		down	up	up	7
HRCT1			down	down		up	up	down	down	down		7
NUDT11			up	down		down	up		up	down	up	7
TRIM31			down	down		up	up	up	up	up		7
KRT40			down	down	down	down		up	up	up		7
UGT2B11			down	down		up	up	up		down	down	7
UBE2QL1			down	up		down		up	up	down	up	7
PCP4L1			down	down	down	down		up		down	up	7
CD5L				up	up	up	down	down	down		up	7
OLFM3				down	down	down	up		up	down	down	7
ANGPTL3				down	down	down	down	up	up	down		7
CCDC146				down	up	up		down	down	down	down	7
FBN3				up		down	up	down	down	up	up	7
TIMD4				up	up	up	down		down	down	down	7
CBR3				up	up		up	up	up	down	up	7
LRRC36				down	up	up	up	down	down	up		7
GRIK2				down	down	down	up	up	up	down		7
KCNV1				down	up	up		up	up	up	up	7
HS6ST2				down	down	down	up	up	up		up	7
CALML3				down	down		down	up	up	down	up	7
S100A2				down	down	down		up	up	down	up	7
XDH					up	up	down	up	up	down	up	7
CHDH	up		down	down	down				down	up		6
EHD2	down	down			up	up		down	down			6
PREX2	down	down	down		up			down	down			6
CELF2	down	down		up				down	down	down		6
CAMK2B	up		down	up			down	up	up			6
DLX3	up	up		down	down			up	up			6
NTN1	down			up		down			up	down	down	6
ATP2B3	down	up		down	down	down				down		6
PTGS2	down	down	up		down	down	down					6
WNT8B	up			down	down	down			up	up		6
EPHA6	down				up			up	up	down	down	6
SCTR	up	down		down	down	down			down			6
COL19A1	down			down		down			up	down	up	6
KCNK2	down			down			up	up	up		down	6
SLCO1A2	up	down		down	down			down		up		6
GCKR	up		down			up	down	up			up	6
PHACTR3	up		up				down		down	up	up	6
SLC15A1	up	up		down				up	up	down		6
SLC26A3	down	down		up			up	down		down		6
APOH	up			down	down	down			down		up	6
SCD	up	down		up	up	up					up	6
PVALB	up	up		up		down	down	down				6
SERPINA4	up				down	down	down	up	up			6
PCK2	up			down	down	down	down			down		6
SGK2	up	down	down		down			up			up	6
BMX	down	down	down		up			down	down			6
VGLL1	up			down	down	down				up	up	6
RGCC	down	down			up	down		down	down			6
FOXF1	down				up		down	down	down	down		6
CRYM	down	up	down	down	down				down			6
IGDCC4	down		down		up	up	up	up				6
NCALD	down	down	down	up					down	down		6
FGL1	up		up	down			down	up		up		6
KLC3	up				down		up	up	up		up	6
LILRB5	down	down			up		down		down	down		6
ISYNA1	up			down				up	up	up	up	6
SCN1B	down		down	up	up	up					up	6
SORCS1	down	up	down	down	down					down		6
HOXB6	up	up	up		down	down					up	6
PF4V1	up			down	up	up			up	up		6
CD69	down				up		down	down	down		down	6
SLCO1B3	up		up				down	up	up	up		6
TBX18	down	down	up	down				up	up			6
ZBTB47	down		down	up				down	down	down		6
EVA1A	up		up	down					down	up	up	6
TNNT2	down			down	down	down	up				up	6
EPCAM	up	up			down	down	up	up				6
ELOVL3	up	down	up		down		up			up		6
DUSP4	down			up	up	up		up			up	6
CLU	down		down			up			down	down	up	6
CSTA	down		down		up	up			up	down		6
SEMG2	up		down	down	down	down				up		6
F13A1	down	down				down	up		down	down		6
HIST1H1D	up	up	up	down				up	up			6
MYRF	up		down	down				down	down		up	6
TMEM255A	down	down		up				down		down	up	6
TMEM35A	down	down	down	up		down				down		6
RGS13	down				up	up		down	down		down	6
VIL1	up	up	up	down		down		up				6
VPREB3	down	up		up				up		down	down	6
BAIAP2L2	up			down	up		up	up	up			6
FOXP2	down	down				up	down			down	down	6
BBOX1	up	down		down			down		up	down		6
LRCH2	down	down		up				down	down	down		6
KIF1A	up	up			down		up	up	up			6
RBBP8NL	up	up	down		down			up	up			6
PDLIM4	down	down						up	up	down	up	6
BARX1	up				up	up		up	up	down		6
MAP1B	down	down		up			up		up	down		6
NR0B2	up			up	down	down			down	down		6
SLC6A11	up	up					up	up	up	down		6
RAMP1	down	up		down		down		up			up	6
REEP2	down			up			up		up	down	up	6
NES	down			down		down	up	down	down			6
DCLK1	down		down		up	up		up		down		6
TRPC4	down		up				up	down		down	up	6
STOML3	up		down		up			down	down	up		6
RSAD2	up	up	up	down			down		down			6
DSC1	up	down	up	down					up	down		6
DTNA	down		down	up		up	up			down		6
PSAT1	up				down		down	up	up	up		6
ITGA7	down	down	down						down	down	up	6
KRT7	up		down	up	down				down	up		6
ALPK3	down	down	down	up			up		down			6
IL36RN	up	up						up	up	down	up	6
SLC28A2	up			down	down	down		up		down		6
SIX3	up	up		down				up	up	up		6
HCN4	up	up	down		down				down		up	6
FRAS1	up			down	down		up	down			down	6
RDH16	up	up	up				down		up	up		6
HDC	down				up	up			down	down	up	6
CYP11A1	up	down	down	up		up				down		6
CLEC18B	up			down	up	down		up	up			6
GREB1L	up	up	down	down				up	up			6
TM4SF5	up			down		down		up	up	down		6
BEST4	up				up	up	up	up		down		6
RGS5	down				up		up	down	down	down		6
S100A8	up	up	down		up				up	down		6
GULP1	down	down	down	up		up	up					6
PTH2R	up			down			up	up	up	up		6
IL17RD	down	down	down					up	up		up	6
TAGLN3	up	up		down	down					down	up	6
TMEM108	down					down	up		down	down	up	6
STXBP5L	down	up		up				up	up		down	6
SLIT2	down	down		up				down	down	down		6
AHSG	up			down				up	up	up	up	6
SPINK7	down		down	up		down			up	down		6
TENM2	up	down	up			down			up	down		6
KCNMB1	down	down	down		up				down	down		6
PSD2	up	down	down	up	up						up	6
GFRA3	down				down	down		up		down	down	6
SLC2A12	down	down			down	down			up	down		6
TRIM50	down	down		up		down	up			down		6
CXorf36	down	down			up		up	down	down			6
DOCK11	down	down		down		up		down	down			6
CACNA1B	up	up	up					up	up		down	6
INA	up	up						up	up	down	up	6
NCAM1	down	down			up		down			down	down	6
ZP1	up				up	up		up	up	down		6
MS4A2	down					up		down	down	down	up	6
AKAP6	down	down	down	up					down	down		6
ANO4	down			up	up	up	up				down	6
ITIH2	up	down		down	down				down	up		6
TMEM132D	down			down	up				down	down	up	6
PLEKHH2	down	down		down		up		down	down			6
LGI4	down	down			up			down	down	down		6
GPR15	down	down			up		down			down	down	6
EPHB1	down	down					down	up	up		down	6
TSPAN7	down	down		up		down		down		down		6
FBXO32	down			up			up	up	up	down		6
SVOPL	up			up	down	down			up		up	6
SLC34A2	up		down	down		up			down		up	6
WDR66	up		up	down			down		up	up		6
GALNT14	up	up		down	up			up	up			6
TMSB15A	up	up	up				up	down		up		6
COLEC12	down			up			up	down	down	down		6
HIST1H2BD	up	up	up	down				up	up			6
CPA5	up		up	down			up	up			down	6
PLA2G2F	up	up	up	down				up		up		6
C9orf116	up	up	down	down		up			down			6
PRKAA2	down		down			down	up	up		down		6
AK4	down	down		down		down		up	up			6
RBP7	down	down	down			down	up			down		6
SPATA17	up	up			down		up			up	down	6
TEKT4	up	up			up	up		down	down			6
HPGDS	down					up		down	down	down	up	6
ALPP	up		up					down	down	up	up	6
DAPL1	down		down	up					up	down	up	6
PPM1L	down	down	down	up		down				down		6
CPA3	down					up		down	down	down	up	6
FBXO40	down	down	down	up		down					down	6
SPRY1	down	down	down		up				down		up	6
ASB5	down	down	down	up		down				down		6
TBX20	down	up	up				down		up	up		6
LRFN5	down	down		up		up				down	down	6
NGB	up	up	up					up	up	down		6
RNASE7	up	down		up				up	up	down		6
ADAMTS15	down		up	down	down			down		down		6
AMN	up			down			down	up	up		down	6
A2ML1	down	up	down					up	up	down		6
PRR15L	up	up	down		down		up		down			6
TUBA1A	down				up	up		down	down	down		6
MFSD3	up	up		up	down			up	up			6
KLK5	up		up	down	down	down					up	6
GNG4	up	up		down			up	up	up			6
CX3CR1	down	down	down		up			down	down			6
KLHL30	down	down	down				up		down		up	6
WFDC12	up		up	down		up		down		down		6
AR	down		down			up	down		down	down		6
ARMC4	down		down	up		up		down	down			6
PCSK9	up		up		down	down				up	up	6
GCSAML	down					up	up	down	down	down		6
ADRB2	down	down		up				down	down	down		6
KCNAB1	down	down	down		up			down	down			6
TACR3	down	up		down	down	down					down	6
PCDH7	down		up		down	down		up	up			6
CALML6	up		down		up		up	up	up			6
MUC3A	up	down	up		up	up		up				6
LONRF2	down		down		down	down				down	up	6
FOXA3	up	up		down	down			up			up	6
DCDC1	up	up		down				down		up	down	6
KCNK3	down			down	up			down	down	down		6
TPPP	down	down		up				down	down		down	6
KRT13	down		down	down					up	down	up	6
ECEL1	up			down		down	up	up		up		6
FGG	up			down	up	up	down	up				6
SYNPO	down	down			up	down		down	down			6
RAB37	down				up	up			down	down	down	6
DMRT2	up	down		up	down	down			up			6
CCDC36	down	down			up		up		down		down	6
TDRD12	up			down			up	up	up	up		6
CD34	down	down				down	up	down	down			6
GALNTL6	down		down	up				up		up	up	6
NLRP6	down	up		down	up					down	down	6
P2RY14	down	down			up			down	down	down		6
CST6	up	up			down				down	down	up	6
LRRTM4	down	down	down		up	up		down				6
CLEC14A	down	down			up	down		down	down			6
TRIM72	up	up	down					up	up	up		6
TMEM151B	up		up	up				up	up	down		6
DNAJC22	up	up		down	up			up	up			6
TPPP2	up	down	down		down	down	down					6
PIPOX	down		up	down	down	down			up			6
SHISA2	up	up	up		down		up		up			6
CHST13	up			down	up	up				up	up	6
MAPK15	up	up		down	up	up				up		6
MUC16	up		down		up	up		up		up		6
C6orf223	up		up		up	down	up			up		6
RTKN2	up	up					up	down	down	up		6
SATB1	down	down	down	up			down			down		6
NXPH3	down		down				up	down	down	down		6
GJC1	down		up		up		up			down	up	6
CCDC60	down	up	down		up			down	down			6
OPCML	down			down		down		up		down	up	6
KCTD16	up	down		down				down	down		down	6
FAM162B	down	down				down	up	down	down			6
TBX1	up	up		up		down			up		down	6
HIST2H2AC	up	up		down			up	up	up			6
GALNT17	down		down	up		down			down	down		6
KRT6B	up				up			up	up	down	up	6
ROR1	down		down				up	down	down		up	6
MUC1	up	up	down		down				down		up	6
NTF3	down		down	down		down	down		up			6
KLK12	up	up	down					up		down	up	6
KRT14	up	down			up			up	up		up	6
AMTN	up	up	up	up						down	up	6
C2orf88	down	down	down	up		down				down		6
DNAJB13	up			down	up	up	up			up		6
HIST1H1C	up	up		down			up	up	up			6
PALM3	up			down	down	down			down		up	6
PLA2G2C	up			up	up			up		down	up	6
HES4	up	up		down	up		up				up	6
ANKRD34B	up	up	up		down			up	up			6
SFTA2	up		down	down	down				down		up	6
MME	up	down			down	down		down		down		6
CACNA1H	down	up		down		down			down	down		6
SERPINB2	down		down				down		up	down	up	6
NMB	up	down	up		up		up		up			6
CLEC9A	down				up		down	down	down	down		6
MT1F	up			down	down	down	down			down		6
ZNF536	down		down	up				down		down	down	6
AKR1C4	up			down		up		up	up	up		6
RYR2	down				up		up		down	down	down	6
DMD	down	down	down				down			down	up	6
STUM	down		down				up	up	down	down		6
PNLIPRP3	up			up		up		up	up	down		6
FOXO6	up	up		down			up	up	up			6
SYT15	down	down		down			up	down	down			6
MUC21	down	up	down					up		down	up	6
TRIM15	up		up	down	up			up	up			6
ARID3C	up			up	up		down		up	up		6
C2CD4B	down	down	down				down		down		up	6
CRLF2	down				up		up	up	down		up	6
TRIM71	up						up	down	down	up	down	6
XKR4	down	down		down	down	up				down		6
KRT222	down		down	down		up		down			up	6
CLDN9	up	up			down			up		up	up	6
ZNF726	up				down	down	up	up	up			6
CPEB1	down	down		up		up		down		down		6
SMTNL1	up		down	up	up			up		up		6
C4B	down	up	down	down	up				down			6
MKRN2OS	up		down		down		up	up			up	6
AKR1B15	up					up	up	up	up	down		6
ORM1	up	up			up		down	up	down			6
DIRC3	down		up	down	up				up	down		6
MCIDAS	up	up			down			up	up	up		6
ANKRD65	up	down		down			up			down	up	6
ACY1	up			down	down	down		up		down		6
GSTA2	up		down	down		down	down			down		6
C4A	down	up	down	down	up				down			6
RAB44	down				up	up		down	down		up	6
RNASE4	down	down	down	down	up				down			6
SLC22A31	up	up					up		down	up	up	6
PECAM1	down	down			up	down		down	down			6
ZNF488	up			down	down	down		up	up			6
RNF225	down		down					up	up	down	up	6
PRSS22		up			down	down		up	up		up	6
SCN4A		down	down		up	down	up	up				6
CACNA2D2		up	down		down	down		down	down			6
SLC7A14		down	down		down	down	up			down		6
DPEP1		up		down	down	down	up	up				6
EFCAB1		down	down	down		up		down	down			6
TLL1		down	up	down	up			down	down			6
CBLN4		down			up		up	down	down		up	6
LIMCH1		down	down	up		down		down	down			6
ATP2C2		up		up	down	down			down		down	6
NGFR		down		up	up		down		up		up	6
SPTB		down	down	down	down	down		up				6
FRMPD1		down	down	up			up	down			down	6
WSCD2		down			down	down			up	down	down	6
PAK3		down	down	down			up	up			down	6
TTC39A		up	down		up	up	up				up	6
FAT2		down			down			up	up	down	up	6
LYZ		up	down		up	up	up		down			6
COL9A3		up		down	down			up	up	up		6
CRTAC1		down	down	up				down	down	down		6
SEZ6L		up	down	up	up	up				down		6
CHRNA4		up		down	down	down		down			down	6
GABRE		down	up	down	up		up		up			6
TMC5		up	down	up		up	up		down			6
SLC6A2		down	up	up	down	down			up			6
FAM189A1		up				up		down	down	down	down	6
DKK4		down	down	up			up	up	up			6
TUBB4A		up				up	up	up	up	down		6
RETN		up			up	up		down	down		up	6
COMP		up		down			up	up		up	up	6
MAG		up		up			down	down	down		up	6
CAV2		down		up	up	up		down	down			6
CRHR2		down	down		up		up		up		up	6
SLC1A1		up	down	down			down	down	down			6
CNTNAP3		down		down			up		up	down	down	6
SLC16A6		up	down		up	up			down	down		6
MYH1		down	down		up		up		down	up		6
HPX		up			up	up	down	up		up		6
C6orf118		up	down	down				down	down		down	6
SLC27A6		down	down		down			down		down	up	6
AADAC		down	down		up			down		down	down	6
PLA2G2D		up	up		up	up		up			down	6
PLPPR5		up	up		up	up		down		down		6
NKX2-3		up	down		up		up		up	down		6
TP53AIP1		down		down	down	down			up	down		6
IQSEC3		down		down		down		down	down		up	6
ACVR1C		down	up	up		down	down		up			6
SPDEF		up	down		up		up	up			up	6
SCGB2A1		up	down		down		up		down	down		6
TGM3		up	down		up		up			down	up	6
PDE11A		down	down	up				up	up		down	6
KCNC1		up	down	up	up		up		up			6
CALY		up			up	up	up	up		down		6
EPS8L1		up	down	down	down			up		down		6
GFAP		down		up	up			up	up		up	6
EMILIN2		down			up	up		down	down		up	6
SLC52A1		up	up			up			up	down	up	6
SLC14A2		down	down	down	down	down		up				6
MYBPH		up			down	down		up		up	up	6
OASL		up	up		up	up	down		down			6
BICDL1		up		down	down		up	up	up			6
CD36		down	down		up			down	down	down		6
AGT		up	down	down				up		up	up	6
SLC19A3		down	down				down	down	down	up		6
MYO1G		up	up		up	up			down		up	6
GALNT5		up	down		up	up			down		up	6
BLK		up	up	down			down			down	down	6
GATA4		up	up		up			up	up		down	6
FGFBP1		down		down	down				up	down	up	6
SLCO5A1		up	down			up	up	up	up			6
PAQR5		up			down	down	up	down	down			6
RBP4		down	down	down				down	down	up		6
PLCZ1		down			down	down	down	up	up			6
FAM222A		up		up	down	down	up		up			6
CBLN2		up		down	down		down		up		down	6
IL19		up	down	down	down	down			up			6
NTN5		down		up	up	up	up		up			6
PRDM16		down			down	down	up		down		down	6
ADAMTSL4		down			up	up		down	down	down		6
SCN1A		up		down	up		up	down	down			6
ROPN1L		up	down	down	up			down	down			6
LIX1		up		down	down		up		up	down		6
GPC3		down			down	down	up	down			down	6
FAM83A		up		down				up	up	down	up	6
NTRK2		down		down	down	down		down	up			6
PLPPR1		down			down	down	up			up	up	6
ADM		down		up	up		down		up		up	6
PLCH2		down		down		down	up	up	up			6
KLRF1		down		up			down	down	down	down		6
MAT1A		up		down			down	up	up	up		6
GABRA2		down		down	down	down	up				down	6
CCL28		down	down	down	up	up		up				6
CCDC74B		up		down	up	up	up	down				6
CAPSL		up	down	down	down			down	down			6
PLA2R1		down		down	down	down			up		down	6
SCN3A		down		down	down	down		up			down	6
FAM92B		up	down		up			down	down	down		6
CHST9		down	down	down	up			down		down		6
VSIG4		down			up	up	down	down	down			6
ART3		up	down	up		down			up	down		6
CLDN8		down	down		down	down			up	down		6
SORCS3		up		down	up			up	up	down		6
SYN2		down	down		down	down	up	down				6
C1orf158		up	down					down	down	up	down	6
KIT		down	down	up		down				down	down	6
GRHL3		up	down					up	up	down	up	6
CD1A		up			up	up		up		down	up	6
ALAS2		down				up	down	down	down		down	6
FGFR4		up	up	down				down	down	up		6
SCGB3A1		down	down		up		down		down		up	6
TTLL10		down	down					down	down	up	up	6
BRINP3		up		down	down		up		down		down	6
KCNF1		up	up	down	up		up	up				6
INAVA		up		down			up	up	up		up	6
TMEM79		up					up	up	up	down	up	6
ICOS		up	up		up	up			down		down	6
PPBP		down	up				down	down	down	up		6
PF4		down		down		up		down	down		down	6
MST1R		up		down		up	up	up			up	6
TLR3		down		down	up		down		down	down		6
SLC29A4		down		up	up		up	up	up			6
ZMAT4		up			up			up	up	down	down	6
OXGR1		down	down	up	down	down			up			6
RET		up				down	down	up	up		up	6
BTNL9		down		up	up	down		down	down			6
TCP11L2		down	down	up				down	down	down		6
LDHD		down	down	up	down		down			down		6
MS4A8		up	down				up	down	down	down		6
GPRC5B		down	down	up	down	down					up	6
IGFBP6		down	up	down		up				down	up	6
TEKT1		up	down					down	down	up	down	6
CYP7A1		down		down			up	down	down	down		6
KRT24		up	down	down	down			up	up			6
SFTPB		down		up		down			down	up	up	6
STK32A		down	down	up	down			up			up	6
GPR37L1		up		up		up	up	up			down	6
FRMPD2		down	down	up					down	up	up	6
SIX2		up		down			up	up	up	down		6
SYT9		up		down		down	down		up		down	6
BFSP2		up		up			up		up	down	down	6
ALK		down		up	up	up				down	up	6
KRT19		up		down		up		up	up		up	6
PTCRA		up		up	up	up		down	down			6
KNDC1		up	down	up	up	up			down			6
LGALS9C		up			up	up		up	up	down		6
PRSS27		up	down		up			up	up	down		6
NIPAL4		up			up	up		up	up	down		6
FADS6		up	down	down				up	up	down		6
OVOL1		up			down	down	up	up	up			6
SNCG		down				up	up	up		down	up	6
AGR3		up	down	down	down				down		down	6
SLC26A9		up	down			down	up		down		down	6
VWA3A		up	down	down		up		down	down			6
PCSK1		up				down	up	up	up		down	6
DPP10		up		up	down			up		down	up	6
CIDEA		down	down			down			up	down	down	6
PLA2G16		down	down	up	up	up			down			6
PRR15		up	down		down	down	up				up	6
LY6H		up		up	up	up	up			down		6
CLVS1		down	down		up	up	up				down	6
UMODL1		up		up	down	down		up	up			6
KCNG2		up			down	down	up	up			down	6
CLRN3		down		down	up		down	up			up	6
ABAT		up		down	down	down	down			down		6
2018-03-11		up		up		down		up	up		up	6
KCNH8		down			up	up		up	up	up		6
SRPK3		up	down	up			up	up	up			6
COLEC10		up				up	down	down	down		down	6
PTP4A3		up	down	up	up		up				up	6
NELL2		up	up		up			down	up		up	6
APOBR		up		up	up	up		down	down			6
IFNE		down	up			up		up	up		up	6
NOTUM		up	up		down		up			up	up	6
HS6ST3		up		up		down			up	down	down	6
FFAR4		down			up	up		down	down		up	6
CIDEC		down	down	down		down		up		down		6
ATP13A5		down		up	down	down			up	down		6
NCCRP1		up	down		down			up	up	down		6
COL25A1		down	down	down		down	down	up				6
NKAIN2		down		down	down		up	up	up			6
PAQR9		down	down		up	up			up	up		6
SBSN		up	down		up			up	up	down		6
LAMB3		down	up	down			up		up		up	6
SMIM10L2B		down		up	down	down				down	down	6
CYSRT1		up	down					up	up	down	up	6
FAM177B		up	down		up	up		up		down		6
DPP4		down		down				up	down	down	up	6
FCGR1B		up			up	up		down	down	up		6
ADH4		down	down			down	down	up		down		6
MB		up	down	up			up	up	up			6
EGFL6		down	up			down	up			up	up	6
RASSF9		down		down	down	down			up		down	6
LDLRAD1		up	down	down			up	down	down			6
NEU4		up	down	down	down	down				down		6
KRT6A		up			up			up	up	down	up	6
GMNC		down		down	down	down			up		up	6
CLEC6A		up	up	down				down	down	up		6
PPP1R3G		down			up	up		up	up	down		6
CROCC2		up	down	down		down			down	up		6
STMND1		up	down				up	down	down	up		6
SHISA8		up		up	down	down			up		down	6
SHISA9		up	down					up	up	down	up	6
CFB		up		down	up	up		up			up	6
KIAA1456		down	down	up				down	down		down	6
HOXA10		down	up				up	up	up	up		6
SALL3		up	up		down	down		up	up			6
SLC5A8		up	down	down	up				down		down	6
CCDC187		up		down	down		up		down	up		6
FRRS1L		down		up	down		up		up	down		6
SERTM2		down		up			down	down	down	down		6
MYMX		down		up	down	down	up			down		6
GAS2L2		down	down	down				down	down		up	6
CBSL		up			down	up	down	up	up			6
C10orf142		down			up		down		down	down	up	6
CFTR			down	up		down	down	down	down			6
SCIN			down	up	down		up	up		down		6
PRSS3			down			down	up	up	up		up	6
INSRR			up		down	down	up	up	up			6
SOX30			up	down	down	down		up	up			6
CHI3L2			down		up	up	up	down	down			6
CHAT			up		up			up	up	down	up	6
FGF20			down		up	up		up		up	up	6
LAMB4			down	up	down	down	up			down		6
TGM1			down	down				down	up	down	up	6
UPK3A			down			up	up	up		up	down	6
TAF7L			up	up		down		up	up	up		6
TSNAXIP1			down	down		up		down	down		down	6
STMN2			down		up		up		up	down	up	6
ANXA13			up	down	up	up	up	up				6
WNT2			up	up			down	down	down	up		6
POU6F2			up	down			down	up	up	up		6
FOLR3			up		down	down		down	down		down	6
CALCA			down		down	down	up	up			down	6
RASAL1			down	down	down		up	up	up			6
HAO2			down	down	down	down	down			up		6
ATP10B			down		down	down		up	up		up	6
CCDC170			down	down			up	down	down		down	6
TNFSF11			up		up		down	up	up	up		6
HPCA			up	down	up	up		up	up			6
SCGB1D2			down	down	down		up		up		down	6
TEKT3			down	down		up		down	down		down	6
OMG			down		up	up	down	down	down			6
MYH10			up	down	down			down	down		up	6
CA1			down		up	up		down	down	down		6
VTCN1			down	down	down			up	up		up	6
WNT10A			up	down	down			up	up		up	6
FOXF2			up		up	up	up	down		down		6
ITGAX			up	up	up	up			down	up		6
ATP6V1C2			down	up	down	down		up	up			6
GADL1			down	down	down	down			down	up		6
MYH15			down	up	up	up			down		down	6
GABRB2			down	down	down	down			down		up	6
SYT8			down	down	up		up			up	up	6
HTR3B			down	up	down	down		up		down		6
THY1			up	down		down	up	up		up		6
DEPTOR			down	down	down	down		up			down	6
HYDIN			down	down		up		down	down	up		6
CACNA2D3			down	down	down		up		up	down		6
VWA5B1			down	up	down	down			down	up		6
NLRP4			up				up	up	up	up	down	6
AQP5			down		down	down	up		down		up	6
SPATA18			down		up	up		down	down		up	6
EFHB			down	down		up		down	down		down	6
EDIL3			up	down	up	up	up				up	6
SPINK1			up	up		down	up	up	up			6
DEFB1			down	up	down			up	up		up	6
C9orf24			down	up		down		down	down		down	6
WNK2			down	down		up	up	up	up			6
TMEM130			up	down	up	up			down		up	6
CLEC4E			up	down	up	up		down	down			6
MESP1			down		up	up	up	up	up			6
IL7R			up	down	up			down	down		down	6
LRP1B			down		down			up	up	down	down	6
PKHD1			up	down	down			up	up	up		6
AGXT			down	down	down	down	down		up			6
CES3			down	down	up	down	down			down		6
MAB21L3			down	up				up	up	down	down	6
UGT2A1			down	down	down	down	down		up			6
LINGO2			up		down	down		up	up		down	6
MUC20			down	up		down		up	up		up	6
B3GNT8			down	up	down				down	down	up	6
AC024940.1			up		up		up	up	up		down	6
CRACR2B			down	up	up		up	up			up	6
SH2D4B			up	down				down	down	up	down	6
SLC9A4			down		down	down		up	up	down		6
FDCSP			down	up			up	up	up		down	6
NTM			up		up		up	down	down		up	6
IGSF5			down	down	down			up	up		down	6
B3GALT5			down	down		up		up	up		down	6
FAM3B			down		down	down	up			down	down	6
INPP5J			down	up	down	down	up			down		6
SFTPA2			down			down		down	down	up	up	6
LSAMP			up	up	down	down		down	down			6
FCAR			up	down	up		down	down	down			6
CYP27C1			up	down		up	up	up	up			6
CLCN1			down	down	down		up	up	up			6
COL4A5			up	down	down		up		up	down		6
NCR1			up	up	up		down	down	down			6
SH2D1B			down	up	up		down	down	down			6
TOX			up	down		down			down	down	down	6
CCDC160			down	down	down			up		down	down	6
C2orf91			up	up		up		down	down	up		6
DIO2			down			down	up	up	up		down	6
TM6SF2			up	down			down	up		down	up	6
ANG			down	down	up		down		down	down		6
TSPAN19			down	down		up		down	down		down	6
GSTA1			down	down		down			up	down	up	6
CCDC13			down		down		up	down	down	down		6
NHLRC4			down		down	down		down	down		up	6
CTXND1			down		down			down	down	down	up	6
MUC22			down		up	up		up	down	down		6
C1orf186			up	down	up	up	up		down			6
FCGBP			down		down		up	up		down	down	6
SSTR3			up	down		down	up			down	up	6
HECW1				down	down	down		up	up		down	6
CYP24A1				down			up	up	up	up	up	6
CP				down	up		down	up	up	up		6
COL9A2				down	down	down	up	up	up			6
RIMBP2				down	down	down		up	up		up	6
AFP				down	down		up	up	up	up		6
FETUB				down	down		down	up	up	down		6
CHGA				down	down		up		up	down	down	6
HAMP				up	up	up	down	up		up		6
ODAM				up	down	down	up	down			down	6
CLDN16				down	down	down			up	up	up	6
HHLA2				down	up	up		up	down	down		6
IGFBP2				down	down	down		up	up		up	6
IL18R1				down	up		down	down	down		up	6
SLC5A7				down	down			down	up	down	down	6
GJB6				down			up	up	up	down	down	6
LYPD3				down	down	down		up	up	down		6
DACH2				down	down	down	up		up		up	6
CDHR3				down	up			down	down	down	down	6
PODXL				down	down	down	up		down	up		6
EDA2R				up	up	up	up		down		up	6
ACY3				down		down		up	up	down	down	6
NTS				down		down	up	up	up		down	6
KLRD1				up	up	up	down	down	down			6
EGR4				down	down	down		up	up	up		6
BCO1				down	up	up		up		down	down	6
GCM1				down	down		up	up	up	up		6
NKD1				down	down	down	up	down	down			6
SLC6A3				down	up		up	up		up	down	6
IGSF11				down	down	down		up	up	down		6
SLC22A8				down	down	down	up	down		up		6
CNDP1				down	down	down	down	up	up			6
PTPRO				down	down	down		down	down	up		6
LGI2				down	down	down	up	up	up			6
GRIA1				up	up			down	down	down	down	6
CDA				up		down	down	up		down	up	6
FAM151A				down	down	down	down		up		down	6
FAM19A4				down	down	down	up		up	down		6
FOXQ1				down	down		up	up	up		up	6
CHP2				down	down	down	up		up	down		6
ENTPD3				down	down	down	up		up	down		6
LGI3				up		up	up	down	down	down		6
UGT3A2				down	down		up	up	up		up	6
SFN				down		up	up		up	down	up	6
C9orf50				down	up	up		up		up	up	6
GPC5				down	down	down	up	down	down			6
GABRG3				down	down		up	up	up		up	6
CYP4F2				down	down	down	down		up	down		6
EDARADD				up		down	up	up	up		down	6
NANOS1				down	down	down	up	up	up			6
GJB4				down		up		up	up	up	up	6
AKR1B10				down		up	up	up	up	down		6
LPA				down	down	down	down	down	up			6
PLXNB3				down	up		up	up	up	down		6
GCGR				up	down	down	down	up	up			6
TUNAR				down		up		up	up	down	up	6
GJA5				down		down	up	down	down		up	6
ADTRP					down	down		down	down	down	up	6
BTNL8					up		up	down	down	down	down	6
ALDH3B2					down	down		up	up	down	up	6
SNX22					up	up	up	down	down		up	6
ITLN2					down	down	up	down	down	down		6
FABP5					up	up	up	down	up	down		6
MYO1A					up	up	up		down	down	up	6
GAP43					up		up	up	up	down	up	6
SPTBN2					down	down	down	up	up		up	6
UGT8					down	down	up	up	up		down	6
GCNT4					down	down		down	down	down	up	6
SLC6A15						up	up	up	up	down	down	6
HS3ST1	down		down			up		up	up			5
ABCB5	down	down				up	up			down		5
ABCB4	down		down		up	up		up				5
ITGA3	up		up	down		up					up	5
ASB4	down	down	down						down	up		5
CX3CL1	down	down						down	down		up	5
SLC6A13	up			down				down	down	down		5
CD22	down			up	up	up			down			5
CLCA4	down	down	down						up	down		5
SLC38A5	up	up	up	down	up							5
SAMD4A	down	down		up					down		up	5
NLRP2	up	up			down			up	up			5
DMRT3	up	down			up			up	up			5
CDON	down		down		up					down	down	5
SPEG	down	down	down				up			down		5
MRVI1	down			up		down			down	down		5
DHRS9	up	down	down		up	up						5
RAP1GAP	up				down	down			down		down	5
AMPH	down			down	down	down		up				5
CDH17	down					up	up	up	up			5
RIMS1	down	up	down	up						down		5
CPB2	up				up			down	down	up		5
MEF2C	down	down	down		up				down			5
LRP2	up			down					down	up	down	5
PCDHGA2	down	down	down				up		down			5
SMARCD3	down		down			up	up			down		5
C3orf18	down		down	up					down	down		5
TBX5	down		up					down	down	down		5
ESR1	down	up		down			down				up	5
CD200	down	down			up	up	up					5
TEKT2	up		down	down				down	down			5
KRT31	up	up	down			up				down		5
SEC14L2	up							up	up	down	up	5
LGALS2	down			down					down	up	down	5
PNPLA3	up				down	down			up	up		5
BDKRB1	down			up		down	up			down		5
MYLK2	up	up	down				up			up		5
PLCB4	down		down	up		up	up					5
LIPG	up			down	down		down			up		5
RS1	up			down	down			down	down			5
CD40LG	down			down	up				down		down	5
FGF9	down			up	down	down			down			5
CBLN1	down	down			up		up				up	5
SEC14L5	down		down	up		down	up					5
SALL1	down		up	down				up	up			5
TOX3	up	up	down		down			up				5
ACSBG1	up		down	up	up			down				5
TLE6	up	up	down			down	up					5
PLA2G4C	down		down		up		up		down			5
HPN	up	up	down						down		up	5
GRIK5	down				down	down		up		down		5
GHRHR	up			down	down		up			up		5
AMBP	up			down	down			up			down	5
ATRNL1	down	up			down				up	down		5
MYH3	down	down		down	up	up						5
FOLR1	up		down	down			up		down			5
APOC3	up			down		down	down			down		5
OAS2	up	up	up		up		down					5
MGP	down		down	down			up		down			5
TPD52L1	down				down				up	down	up	5
GLP1R	up		down			up	up				up	5
MEP1A	up				up	up	up			down		5
IRX4	up		up					up	up	down		5
CPEB4	down		down	up		down			down			5
ODC1	down		up	down				up	up			5
GRIN3B	up					up	up	down		up		5
FBXO2	up		up		down			up			up	5
PTCH2	down	down	down		up						down	5
PLPPR4	down	down					up		down	up		5
SERPINC1	up	up		down	down	down						5
COLEC11	down		up	down		down	down					5
RARRES1	up		down			up	up			up		5
CCND2	down				up	up		down			up	5
PPP4R4	up		up	up	down			down				5
CNNM1	down			down			up	up	up			5
TTLL2	down			down		up		up		up		5
ENOX1	down			down	down	down	up					5
CPXM2	down	down		up		down				down		5
SSPN	down	down	down	down	up							5
NCKAP1L	down				up	up		down	down			5
TNFAIP6	down				up	up	up				up	5
DAW1	up					up			down	up	up	5
KCNS1	up		up	down		up				up		5
SLURP1	up	up	down						up	down		5
APOBEC3A	down	up			up		down	down				5
AP1M2	up	up			down	down	up					5
PRRG3	down	down					up	down			down	5
PNPLA7	down		down		up		down		down			5
SMPDL3B	up			down		up	up	up				5
GGT2	up	down			up	up					up	5
SLCO1B1	up						down	up	up	up		5
EPHA7	down			down					up	down	down	5
PRPH	down				up			down		down	up	5
AMHR2	down		down			up	down		down			5
IL1RN	down		down				down			down	up	5
KIF12	up	up	up	down				up				5
TFAP2A	up				down		up	up	up			5
FGFBP2	down	down			up			down		down		5
MGARP	down	down		down	up				down			5
PI15	down		up				up	up	up			5
CASP5	up				up	up		down	down			5
LHCGR	down	down						up		down	down	5
DUSP5	down		down				down			down	up	5
ZNF365	up					up	up	down		down		5
PDE5A	down							down	down	down	up	5
TRPC3	down			up		up		down	down			5
FBN2	up	up	up	down					up			5
SLCO1C1	down	down			up		up		down			5
SLC39A5	up			down			down	up		down		5
NOVA1	down		down				up			down	up	5
SLC24A4	down	down			up			down	down			5
WDR93	up		down	down					down	up		5
FHAD1	up			down			up	down	down			5
IL22RA1	up			down	up			up	up			5
KCNN3	down					down	up		down	down		5
ACTA1	down	up	down	down			up					5
MALL	down		down		up				down	down		5
STAC	down			up				down	down		up	5
NFKBIZ	down			down		up		down	down			5
PHLDB2	down	down	up					down			up	5
ADAMTS16	down		up		down		up	up				5
SRD5A1	up			up			down	up	up			5
ZNF300	up			down			up	up	up			5
CREB5	down	down			up	up					up	5
CSGALNACT1	down			up		down			down		down	5
CRH	up				down	down		down	down			5
RSPO2	down							down	down	down	up	5
SLC39A4	up	up			down		up	up				5
VLDLR	down	down		up			up			down		5
A1CF	up			down		down		up	up			5
NPFFR1	down				up				down	up	up	5
TMC2	down	down	down		up			down				5
MKX	down	up		up						down	up	5
CACNA1C	down					down	up		down	down		5
KCNE4	down	up			up			up		down		5
RAB3C	down	down	down	up	up							5
GPR26	down	up	down	up				up				5
TMPRSS15	up		up				up		up	down		5
DKK2	up						up	down	down	up		5
PTPRN2	down	up	down	down					down			5
LRGUK	up					up	up			up	down	5
MMP16	down		up	up	up						up	5
HKDC1	up		up				up	up			down	5
TMEM171	up	up						up	up		down	5
TRIM63	down		down			up			down		up	5
LRRC43	up		down	down	down				down			5
MRAS	down	down					up	down	down			5
DYNC1I1	down			down			up		up	down		5
MPZ	down		down	down			up			down		5
M1AP	up		up	down	down					up		5
PIP	up		down	up		up				up		5
CYP3A7	up			up		down		down	down			5
PGLYRP2	up	up			up		down		up			5
CYGB	down	down			up			down	down			5
ALOX15	up		down	down				down		up		5
FGF11	up				up			up	up		down	5
PDZK1IP1	up			down			up	up			up	5
DIRAS3	down				down		down		down		up	5
KCNJ3	down	up	down	down		down						5
IHH	up						up	down	down		down	5
FABP1	up			down	down	down				down		5
ADAMTS9	down	down		down					down		up	5
SLC6A20	up		down			up			down		up	5
FYCO1	down		down	up					down	down		5
HAND2	down						down		up	down	down	5
EBF1	down	down				down	up		down			5
CSF2	up		up						down	up	up	5
TXLNB	down		down		up	up				down		5
SHH	down	up		down		up					up	5
TRPV6	up		down	down	down	down						5
JCAD	down					down	up	down	down			5
PRAP1	up		up	down				up		down		5
OTOGL	down			down	down	down		up				5
CACNB2	down		down	up					down	down		5
LIPC	up	down		down		up				up		5
PPP1R14D	up				up		up	up		down		5
MYRFL	up	up			up		up			down		5
GALR1	down	down		up		down				down		5
CFAP52	up			down		up		down	down			5
C16orf45	down		down						down	down	up	5
TAC3	up						up	up	up	down		5
PRRT2	down	up			up	up	up					5
LPO	up		down	down				up	up			5
AXL	down				up	up	down		down			5
HRASLS5	down	down	down	up					down			5
SFTPC	down			up		down		down	down			5
SPRR1B	up							up	up	down	up	5
P2RY1	down				up			down	up	down		5
SEMA3E	down		down	down					down		up	5
VSTM2A	down	up				up				down	down	5
SGCD	down		down	up					down		down	5
CYTL1	down	down			up		up			down		5
PDGFD	down	down	down		up					down		5
NPTX1	down		up				up	up		down		5
KSR2	up			down	down	down	up					5
ADRA1D	down					down	up	down		down		5
CFAP53	up			down			up	down	down			5
PLK3	down			down			down		down		up	5
IGDCC3	up				down	down	up	up				5
SLC29A2	up			up	down	down				up		5
SLC22A1	up		up	down		down	down					5
GAL3ST3	up			down	down	down			up			5
GRAMD2A	up			down				down	down		down	5
DENND2C	down	down						down	up	down		5
TUBB6	down	down			up			down		down		5
BDNF	down				up	up		down	down			5
TMEM52	up		down	up				up	up			5
TMEM139	up			down				down	down		down	5
C10orf67	up	up						down	down		up	5
LRRC3B	down	down			up		up			down		5
FAM216B	down	up	down					down	down			5
ADGRD2	up	down	up						up	up		5
PNPLA1	up			down	down	down					down	5
RNF182	up			down	down			down		up		5
HIST1H2BC	up	up		down				up	up			5
S1PR5	up		up		up				up	down		5
OR52N4	down	down		down	up				down			5
PENK	down	down							up	down	up	5
PLAG1	up			up	down		up				up	5
SLC9A9	down	down			up		down			down		5
SLC2A4	down	down	down	up						down		5
HCAR2	up	down		up						down	up	5
GAS6	down			up		down		down	down			5
PGPEP1L	down		down	up		down					down	5
EFHC2	down		down	down			up			down		5
TUBA8	up		down		up	up					down	5
DNAH2	up			down		up			down	up		5
ALDH1A3	down	down	down		down						up	5
HIST2H2BE	up	up			down			up	up			5
LRRC26	up	up	down				up	up				5
SMIM10	down	down			up				down	down		5
FLRT2	down	down	up			down					down	5
IFIT1	up	up	up	down			down					5
CARMIL3	up				up		down	up	up			5
MAGEE2	down				down	down				down	up	5
PDZD7	up		up	down			up				up	5
CCK	up			down	down				down	down		5
AGRN	up		up	down						up	up	5
JAKMIP3	down						up	up	up		down	5
RNF222	down		down					up	up	down		5
MYBPC1	up		down				up	up	up			5
AJAP1	down		up	down				down			up	5
SLC30A10	up				up			up	up	down		5
ARID5A	down	down			up			down	down			5
VEPH1	up				down			down	down		down	5
BCO2	down			up		up	down	down				5
CCDC151	up	up		up				down	down			5
NUP62CL	up			down				up	up	up		5
DCAF12L2	down			up				up	up	down		5
TXNRD1	down					up	up	up	up			5
SUCNR1	up				down		down			up	down	5
RYR3	down	down	down	up						down		5
GRK5	down	down			up			down	down			5
RBM20	down		down			up	up			down		5
NHSL2	down					down		down	down		up	5
C10orf128	down	down			up			down	down			5
NCR3	down				up				down	down	down	5
KRTAP2-3	up			down		up		up			up	5
PPM1N	up			down		up				up	up	5
SLC23A3	up			down		down		up	up			5
LINGO3	down	up			up	up					down	5
TMEM233	down		down	up	up				down			5
ZNF492	up		down				up	up	up			5
PCDHGC3	down			down	up			down	down			5
PNMA2	down			down	up	up			down			5
SPRR2F	up	down	down					up	up			5
ACTN3	down	down	down		up						down	5
PRSS51	up	down			up			up		up		5
CARD17	up	up						up	up	down		5
CLEC12B	up				up			down	down		up	5
AC005726.2	up			down		down			up		down	5
SPON1	down			down		up			down	down		5
SMIM22	up	up			down			up			up	5
MUSTN1	down		down				up		down	down		5
ADRA2B	down	down				down	down		up			5
DGKK	up						up	down	down	down		5
TNMD		down	down	down		down		up				5
TFPI		down		down		up			down		down	5
CALCR		down				down	up	up		up		5
GPRC5A		up			down			down	down	up		5
VIM		down			up	up		down	down			5
ADAMTS6		up	up	down		down	up					5
EPN3		up			down	down		up	up			5
SLC4A8		up		down	down	down			down			5
LAMA3		down	up	up		up	up					5
CYFIP2		up		down	down	down			down			5
CTNNA2		up	down	up			up	up				5
ADGRF5		down		up		down		down	down			5
SLC12A3		up		down	down	down					down	5
TP63		down				down			up	down	up	5
ABCB11		down	down		up			up		up		5
SLC12A1		up		down	down	down	up					5
HOXA9		down	up				up		up	up		5
EDN1		down		down	up			down	down			5
SLC1A3		down		up	up	up	up					5
PIH1D3		up	down					down	down		down	5
TRPM3		down		down		down	up				down	5
APOB		down	down		up					down	up	5
CETP		down			up		down	down	down			5
FXYD3		up				down	up		up		up	5
P3H2		down	up				down	down		down		5
CAPN3		down	down	down					down		up	5
IGFALS		up	down		down		down		down			5
MISP		up		down	down		up				up	5
PLA2G3		up		up	down	down		down				5
NEFH		up	up		down			up	up			5
BIK		up			down		up	up	up			5
PTK6		up	down	down				up	up			5
HAO1		up		down	down	down	down					5
SYP		up			down	down	up				down	5
CCL17		up		down		up			down		up	5
SLC7A5		up	up	down				up	up			5
RP1		up			down				down	up	up	5
LAPTM4B		up			down		up	up	up			5
ESRP1		up			down		up	up	up			5
CEACAM5		up	down					up	up	up		5
CAPS		up	down		down			down	down			5
SH3GL2		up			down			down	down	down		5
VSIR		down			up			down	down	down		5
DNAJC12		up		down	down		down	up				5
EFNB3		down		down		up	down				up	5
MS4A4A		down			up	up		down	down			5
CCKBR		up			up	up			up	down		5
SLC1A2		up	down	up		down					down	5
ACSS3		down	down	up				down	down			5
AGXT2		up		down	down	down	down					5
PRLR		up		up	down	down			up			5
FGF1		down		down	down	down					up	5
RHOU		down	down			up			down	down		5
RPE65		down	up		up			up	up			5
GRIA2		up					up		up	down	up	5
ACADS		down	down	up			down			down		5
PDE1B		down			up			down	down	down		5
G0S2		down		up			down		down		up	5
C4BPA		down		down		up			down	up		5
MOGAT1		down	down			up		down	down			5
C20orf85		up	down					down	down	up		5
XG		down		down		down	down		up			5
DNAH8		up		down		down	up				down	5
EDN2		up		down				up	up	down		5
FOXA1		up	down	down				up			up	5
ARHGEF6		down		up	up			down	down			5
GDPD2		up	up			down			up	down		5
GADD45G		up	down	up			down			down		5
CACNG6		up	down					down	down	up		5
GDF15		up			down			up		up	up	5
PYY		up		up		down				down	down	5
RAB25		up	down		down	down		up				5
SYT4		up				down		down		down	down	5
RNF17		down					up		up	up	down	5
LGALS12		down	down		up	up			down			5
RARRES3		up		up	up	up			down			5
HRASLS2		up		down	down	down				down		5
DYDC2		up	down				up	down	down			5
CHL1		down	down		down			up		down		5
REG4		up	down		down			up	up			5
C5AR2		up		up		down			down		up	5
UGT2B28		down	down	up				up	up			5
CGA		up			down	down		up	up			5
CAPN9		up	down				up		down	down		5
EDAR		down	down	down					up	up		5
SCN2A		down	up		down				up	up		5
CAPN11		down			up		up	down			up	5
TRIM29		down		down					up	down	up	5
MSTN		down	down	down	up					down		5
PCDH10		up		down	up			down		down		5
FGF5		up	up	down				up		down		5
B4GALNT3		up		up	down	down					up	5
N4BP2L1		down			up		down	down	down			5
SLC27A2		up	down	down		down	down					5
CDH13		down			up		up	down			up	5
ADAD2		down		down	down				up	down		5
STAC2		down	down	up		down					up	5
KLK3		down		up			up	down		up		5
CORIN		up			down		up		down	up		5
CDH18		up			down	down	up	up				5
SLC25A48		up		down				up	up		up	5
N4BP3		up	down	up			up			down		5
LRRTM2		down	up	down		down					down	5
TTBK1		up	up	down				up	up			5
TMEM140		down		up	up	up			down			5
FRMPD3		up			up			up		down	down	5
ARHGAP36		down	down		up				up		up	5
TMEM236		down						down	down	down	up	5
DRD2		down	down	up					up		up	5
FEZ1		down	up				down	down		down		5
CDH22		down	down	up			up				up	5
CLEC1A		down			up	down		down	down			5
C11orf53		down		up		down		up	up			5
C2orf50		up	down						down	up	down	5
BTBD11		down			down			up	up	down		5
GRIA4		down	down	down	up					down		5
CPB1		up	down	up	up					down		5
FAM81B		up	down	down				down	down			5
HS3ST3A1		up				down	down	up	up			5
CDH12		down		up			up		up	up		5
CNTNAP3B		down		down			up	down		down		5
NAT2		up		down	down		down			down		5
CACNA1D		up	down	up					down	up		5
AFAP1L1		down		up	up			down	down			5
PALM2-AKAP2		down					down	down	down	up		5
SHROOM4		down		down				down	down		up	5
CATIP		up	down	down				down	down			5
CPA2		down	up				up		up	down		5
FGF17		down			up	up	up			up		5
CELF3		up			down	down		up			down	5
RSPH1		up	down	down				down	down			5
ASB16		up	down	up			up			down		5
SSTR5		up			down		up		up	up		5
HS3ST6		up		down	down					down	up	5
TMEM82		up		down			down	up		down		5
FCAMR		up		down	down			up			down	5
IVL		up						up	up	down	up	5
CRYBA2		up	up					up	up	down		5
FCRL4		up						up	up	down	down	5
NUAK2		up		down	down	down					down	5
CTLA4		up	up		up	up					down	5
ABHD6		down		up			down	down		down		5
CAMP		up			up	up		down	down			5
DACT2		down		down	down				up	up		5
HCN1		down	down			up		up		down		5
C7orf57		up	down	up		up			down			5
SLC30A8		up		down	down	down	up					5
ASB11		down	down	up					down	down		5
CLDN3		up	down	down		up		up				5
SLC7A3		down		down	down				up	down		5
PHYHIPL		down		down			up	up	up			5
C10orf10		down	down		up			down	down			5
EML5		down	up		down					down	down	5
GLB1L3		down			up	down	up	up				5
C16orf71		up	down					down	down		down	5
IQCD		up	down	down			up		down			5
YPEL4		down		up	up	up					up	5
NYAP1		down		down	down	down			up			5
TBX10		up	down					up	up	down		5
NSG1		down			down				up	down	up	5
PXDC1		down			up		down	down	down			5
RASSF6		down			up			up	up		down	5
PROKR1		down	down				up	up	up			5
WNT10B		down			up	up		up	up			5
MYO7B		down	up	down				down	down			5
SERPINA9		up	up					down	down		down	5
ANKK1		down			up	up			up		down	5
LRRN2		up		up	down	down	up					5
MZB1		up		down	up			up		down		5
KCNG3		up	up		down				up	up		5
LRG1		up	down	down			down				up	5
HOPX		up	down				up		down	down		5
CALB2		down			up	up			up		up	5
CCL11		up	up		down	down				down		5
AZU1		up			up	up			down		up	5
KCNH6		up		down	down		up		down			5
GSTA3		up		up				down	down	down		5
ZG16		up			down		down	up		down		5
C1orf127		up	down	up	up	up						5
CALCB		up			down		up	up	up			5
HSD11B2		up	down	up	down	down						5
C10orf71		down	down	up		down		up				5
CCDC185		up		down	down			up	up			5
LMO7DN		down	down			up		down	down			5
[truncated: 2,738 more rows]

## Sheet: Total DEMs
DEMs	BLCA	BRCA	HNSC	KICH	KIRC	KIRP	LIHC	LUAD	LUSC	STAD	THCA	Frequency
miR-183	up	up	up	up		up	up	up	up	up	up	10
miR-96	up	up	up	up		up	up	up	up	up	up	10
miR-1-1	down	down	down	down	down	down		down	down	down		9
miR-1-2	down	down	down	down	down	down		down	down	down		9
miR-1258	down	down	down	up			down	down	down	down	down	9
miR-133a-1	down	down	down	down	down	down		down	down	down		9
miR-133a-2	down	down	down	down	down	down		down	down	down		9
miR-135b	up	up	up	down		up	up	up	up	up		9
miR-182	up	up		up		up	up	up	up	up	up	9
miR-195	down	down	down	down		down	down	down	down	down		9
miR-21	up	up	up		up	up	up	up		up	up	9
miR-144		down	down	up	up	up		down	down	down	down	9
miR-133b	down	down	down	down		down		down	down	down		8
miR-139	down	down	down			down	down	down	down	down		8
miR-204	down	down	down	down	down		up		up	down		8
miR-205	up	down		down			up	up	up	down	up	8
miR-210	up	up	up		up	up		up	up	up		8
miR-551b	up	down				up	up	up	up	down	up	8
miR-675	up	down		down	down	down		up	up	up		8
miR-93	up	up	up			up	up	up	up	up		8
miR-937	up	up	up				up	up	up	up	up	8
miR-1269a		up	up	down	up		up	up	up	up		8
miR-1269b		up	up	down	up		up	up	up	up		8
miR-184		up		down	down	down	up	down		up	up	8
miR-196a-1		up	up	down			up	up	up	up	up	8
miR-196a-2		up	up	down			up	up	up	up	up	8
miR-206		down	down	down	down	down		down	down		down	8
miR-451a		down	down	up	up			down	down	down	down	8
miR-105-1	up	up	up				up	up	up	up		7
miR-105-2	up	up	up				up	up	up	up		7
miR-1247	down	down	down	down		down		down			down	7
miR-141	up	up		up	down	down		up	up			7
miR-145	down	down		down		down		down	down	down		7
miR-187	up	up	up	up				up	up		up	7
miR-188	up	up			down	down		up	up	up		7
miR-19a	up	up	up				up	up	up	up		7
miR-203b	up	up			down	down	up	up	up			7
miR-323b	up		up		down	down	up	up	up			7
miR-4746	up	up	up			up	up		up	up		7
miR-483	up	down		down		down	up	down		up		7
miR-503	up	up	up					up	up	up	up	7
miR-615	up	up	up	down				up	up	up		7
miR-767	up	up	up				up	up	up	up		7
miR-486-1		down	down	up				down	down	down	down	7
miR-486-2		down	down	up				down	down	down	down	7
miR-891a		down		up		down	up	up	up		up	7
miR-217			down	down	down	down	up	up		up		7
hsa-let-7c	down	down	down				down	down		down		6
miR-1251	up			down	down	down	up	up				6
miR-1301	up	up	up				up		up	up		6
miR-130b	up	up	up					up	up	up		6
miR-143	down	down	down					down	down	down		6
miR-200a	up	up			down			up	up	up		6
miR-203a	up	up			down	down			up	down		6
miR-218-1	down		down	up				down	down	down		6
miR-218-2	down		down	up				down	down	down		6
miR-224	up		up		up		up	up	up			6
miR-301a	up	up	up				up	up	up			6
miR-301b	up		up				up	up	up	up		6
miR-3065	up	up		down	down				down		up	6
miR-31	up		up			up		up	up		up	6
miR-33a	up	up			down	down		up	up			6
miR-33b	up	up			up		down	up	up			6
miR-4326	up	up	up				up		up	up		6
miR-584	up	down		up	up	up				up		6
miR-616	up			up	up	up		up	up			6
miR-877	up	up	up				up		up	up		6
miR-944	up	down	up				up		up	down		6
miR-592		up	up		up	up		up		up		6
miR-9-1		up	up				up	up	up		down	6
miR-9-2		up	up				up	up	up		down	6
miR-9-3		up	up				up	up	up		down	6
miR-135a-1			down	down	down	down	up		down			6
miR-135a-2			down	down	down	down	up		down			6
miR-196b			up			up	up	up	up	up		6
miR-539			down	down		down	up	up	up			6
miR-508				down	down	down	up			up	up	6
miR-100	down	down	down						down	down		5
miR-127	down		down	down	down	down						5
miR-1270	up				up	up	up		up			5
miR-140	down	down	down					down	down			5
miR-142	up	up			up			up	up			5
miR-181b-1	up	up			up					up	up	5
miR-181b-2	up	up			up					up	up	5
miR-18a	up	up	up				up			up		5
miR-192	up	up		down				up	up			5
miR-200c	up	up		up	down				up			5
miR-215	up	down		down	up			up				5
miR-26a-1	down		down					down	down	down		5
miR-299	down	down	down	down		down						5
miR-30a	down		down					down	down	down		5
miR-3200	up	up					up		up	up		5
miR-335	up	down		down	down					up		5
miR-337	down	down	down	down		down						5
miR-345	up	up			down			up	up			5
miR-34c	up					up	up	down	down			5
miR-377	down	down	down	down		down						5
miR-378a	down	down	down					down		down		5
miR-379	down	down	down	down		down						5
miR-429	up	up			down			up	up			5
miR-433	down	down	down			down			up			5
miR-454	up	up	up				up		up			5
miR-4652	up		up				up	up	up			5
miR-4668	up	up				up		up	up			5
miR-490	down						down	down	down	down		5
miR-519a-1	up	up	up				up			up		5
miR-585	down	down	down	down	down							5
miR-654	down	down	down	down		down						5
miR-6892	down	down				up		down	down			5
miR-760	up	up		up		up			up			5
miR-7706	up	up				up	up		up			5
miR-934	up			down	down					up	up	5
miR-375		up	down					up	down		up	5
miR-4732		down		up				down	down		down	5
miR-493		up		down			up	up	up			5
miR-497		down	down	down		down			down			5
miR-5586		up			up	up	up			up		5
miR-6510		down	down					up	up	down		5
miR-136			down	down	down	down		up				5
miR-190a			down	down		down		down	down			5
miR-216a			down	down	down	down	up					5
miR-199a-1				down	down	down	down	up				5
miR-199a-2				down	down	down	down	up				5
miR-4661				up		up	up		up	up		5
miR-509-2				down	down	down		up			up	5
miR-514a-1				down	down	down	up				up	5
miR-514a-2				down	down	down	up				up	5
miR-514a-3				down	down	down	up				up	5
miR-106a	up	up						up	up			4
miR-10b	down	down				down	up					4
miR-125b-1	down	down	down		down							4
miR-125b-2	down	down	down		down							4
miR-138-2	up				down				down		down	4
miR-149	up				down				up	down		4
miR-200b	up	up			down				up			4
miR-202	down		down					down		down		4
miR-20a	up						up	up		up		4
miR-26a-2	down		down					down	down			4
miR-29a	down		down	up					down			4
miR-3199-2	down	down						down		down		4
miR-3614	up	up				up	down					4
miR-3651	up		up						up	up		4
miR-378c	down	down	down					down				4
miR-383	down	down	down							down		4
miR-411	down		down	down		down						4
miR-431	down		down			down	up					4
miR-432	down	down	down			down						4
miR-455	up		up	down					up			4
miR-526b	up						up	down	up			4
miR-5683	down	down	down							down		4
miR-577	up					down		up	up			4
miR-590	up	up						up	up			4
miR-651	up			up		up			up			4
miR-671	up			up		up			up			4
miR-708	up							up	up	up		4
miR-99a	down	down	down						down			4
miR-129-2		down			down	down			up			4
miR-3127		up				up	up			up		4
miR-326		down		down				down	down			4
miR-3677		up					up	up	up			4
miR-376c		down	down	down		down						4
miR-452		down			up		up		up			4
miR-101-1			down				down	down	down			4
miR-29c			down			down			down	down		4
miR-338			down			down	up		down			4
miR-369			down	down		down			up			4
miR-376a-1			down			down		up	up			4
miR-424			up				down	up	up			4
miR-487b			down	down		down		up				4
miR-496			down			down		up	up			4
miR-885			down	up	up	up						4
miR-134				down		down		up	up			4
miR-154				down		down		up	up			4
miR-214				down	down	down	down					4
miR-216b				down	down	down	up					4
miR-3607				up			down	up	up			4
miR-485				down		down	up		up			4
miR-509-1				down	down	down					up	4
miR-509-3				down	down	down					up	4
miR-561				up		up		up	up			4
miR-129-1					down	down			up	down		4
miR-146b					up	up				up	up	4
miR-323a					down	down		up	up			4
miR-500b					down	down	up			up		4
miR-412						down	up	up	up			4
miR-552							up	up	down	up		4
miR-1277	up							up	up			3
miR-1293	up		up						up			3
miR-1304	up		up							up		3
miR-1307	up					up			up			3
miR-137	up							up	up			3
miR-138-1	up				down						down	3
miR-147b	up							up	up			3
miR-17	up						up			up		3
miR-185	up			up		up						3
miR-20b	up				down			up				3
miR-34b	up					up			down			3
miR-365a	down	down								down		3
miR-365b	down	down								down		3
miR-3934	up		up			up						3
miR-4728	up	up								up		3
miR-504	down							down		down		3
miR-516a-2	up		up				up					3
miR-517a	up						up	down				3
miR-517b	up						up	down				3
miR-518b	up						up	down				3
miR-518c	up						up	down				3
miR-518e	up						up	down				3
miR-520a	up						up	down				3
miR-522	up						up			up		3
miR-525	up						up	down				3
miR-550a-1	up		up					up				3
miR-653	up						up	up				3
miR-7-3	up		up							up		3
miR-7705	up		up					up				3
miR-940	up	up							up			3
miR-155		up			up	up						3
miR-193a		down						down		down		3
miR-3170		up				up		up				3
miR-381		down	down	down								3
miR-494		down				down			up			3
miR-495		down	down	down								3
miR-511		down					down		down			3
miR-7-1		up						up	up			3
miR-101-2			down					down	down			3
miR-2355			up		up			up				3
miR-450a-1			up				down	up				3
miR-450a-2			up				down	up				3
miR-450b			up					up	up			3
miR-548b			down			down			down			3
miR-550a-2			up	up						up		3
miR-7-2			up							up	down	3
miR-889			down				up	up				3
miR-181c				down		up			down			3
miR-181d				down		up					up	3
miR-194-1				down				up		up		3
miR-194-2				down				up		up		3
miR-199b				down		down	down					3
miR-221				up			up				up	3
miR-222				up			up				up	3
miR-30d				up			up		down			3
miR-506				down	down	down						3
miR-514b				down	down	down						3
miR-30b					down	down			down			3
miR-362					down	down	up					3
miR-363					down					down	down	3
miR-4677					up	up				up		3
miR-500a					down		up			up		3
miR-501					down		up			up		3
miR-223						up			down	up		3
miR-34a						up	up				up	3
miR-376b						down		up	up			3
miR-1911							up	up	up			3
miR-372							up	up		up		3
miR-409							up	up	up			3
miR-548v								up	up	up		3
miR-1262	down	down										2
miR-1283-2	up						up					2
miR-1323	up						up					2
miR-150	down										down	2
miR-191	up	up										2
miR-1910	up		up									2
miR-19b-2	up						up					2
miR-23b	down									down		2
miR-27b	down									down		2
miR-28	down									down		2
miR-32	up	up										2
miR-3613	up				up							2
miR-378d-2	down		down									2
miR-425	up							up				2
miR-4724	up	up										2
miR-498	up						up					2
miR-512-1	up						up					2
miR-512-2	up						up					2
miR-515-1	up						up					2
miR-515-2	up						up					2
miR-516a-1	up						up					2
miR-516b-1	up						up					2
miR-517c	up						up					2
miR-518a-1	up						up					2
miR-518a-2	up						up					2
miR-518f	up						up					2
miR-519a-2	up						up					2
miR-519b	up						up					2
miR-519c	up						up					2
miR-519d	up						up					2
miR-520b	up						up					2
miR-520c	up						up					2
miR-520d	up						up					2
miR-520f	up						up					2
miR-520g	up						up					2
miR-520h	up						up					2
miR-521-1	up						up					2
miR-524	up						up					2
miR-527	up						up					2
miR-5698	down							up				2
miR-576	up			up								2
miR-642a	up								up			2
miR-6499	up								up			2
miR-6854	up										up	2
miR-7156	down										up	2
miR-942	up			up								2
miR-1295a		down					up					2
miR-1468		down		up								2
miR-190b		up					up					2
miR-3150b		up						down				2
miR-342		up			up							2
miR-449a		up						up				2
miR-676		down	down									2
miR-758		down				down						2
miR-92b		up					up					2
miR-148a			down					up				2
miR-151b			down						down			2
miR-193b			up						up			2
miR-3928			up						up			2
miR-410			down				up					2
miR-655			down					up				2
miR-7702			up						up			2
miR-95			down	down								2
miR-1180				down			up					2
miR-15b				up				down				2
miR-29b-1				up				up				2
miR-3653				up					up			2
miR-382				down				up				2
miR-4484				up		down						2
miR-4662a				up		down						2
miR-598				up				down				2
miR-6842				up							up	2
miR-7641-1				up				down				2
miR-7641-2				up				down				2
miR-874				up		down						2
hsa-let-7e					down			down				2
miR-106b					up	up						2
miR-1271					up				up			2
miR-4772					up	up						2
miR-532					down		up					2
miR-599					up	up						2
miR-660					down		up					2
miR-126						down			down			2
miR-219a-1						up			up			2
miR-489						down		up				2
miR-589						up	up					2
miR-935						up				up		2
miR-1226							up	down				2
miR-421							up		up			2
hsa-let-7a-1								down	down			2
hsa-let-7a-2								down	down			2
hsa-let-7a-3								down	down			2
miR-1306								down	up			2
miR-153-2								up	up			2
miR-1976								down	down			2
miR-628								up	up			2
miR-6720								down		down		2
miR-1224									up		up	2
miR-181a-1									down		up	2
miR-181a-2									down		up	2
miR-4709									down		up	2
miR-1298	down											1
miR-132	down											1
miR-1912	down											1
miR-19b-1	up											1
miR-23c	down											1
miR-3074	up											1
miR-324	up											1
miR-339	up											1
miR-340	down											1
miR-374b	down											1
miR-3913-1	up											1
miR-3913-2	up											1
miR-4636	up											1
miR-4786	down											1
miR-548ba	down											1
miR-6507	down											1
miR-6761	down											1
miR-148b		up										1
miR-370		down										1
miR-449b		up										1
miR-6716		down										1
miR-1245a			up									1
miR-208b			down									1
miR-211			down									1
miR-30e			down									1
miR-3652			up									1
miR-3662			up									1
miR-376a-2			down									1
miR-378d-1			down									1
miR-378i			down									1
miR-3922			up									1
miR-3940			up									1
miR-4791			down									1
miR-499a			down									1
miR-656			down									1
miR-1287				down								1
miR-130a				down								1
miR-22				up								1
miR-3117				down								1
miR-3152				up								1
miR-3191				up								1
miR-4461				up								1
miR-4501				up								1
miR-4999				up								1
miR-550a-3				up								1
miR-582				up								1
miR-618				up								1
miR-659				up								1
miR-6715a				up								1
miR-766				up								1
miR-887				down								1
miR-888				up								1
miR-890				up								1
miR-891b				up								1
miR-892a				up								1
miR-892b				up								1
miR-892c				up								1
miR-122					up							1
miR-15a					up							1
miR-16-1					up							1
miR-16-2					up							1
miR-3130-1					up							1
miR-3130-2					up							1
miR-374c					up							1
miR-629					up							1
miR-146a						up						1
miR-513c						down						1
miR-625						up						1
miR-6509						up						1
miR-6718						up						1
miR-103a-1							up					1
miR-103a-2							up					1
miR-1266							up					1
miR-2114							up					1
miR-3591							up					1
miR-3682							up					1
miR-373							up					1
miR-380							up					1
miR-3923							up					1
miR-466							up					1
miR-516b-2							up					1
miR-520e							up					1
miR-523							up					1
miR-541							up					1
miR-5589							down					1
miR-6715b							up					1
hsa-let-7b								down				1
hsa-let-7d								down				1
hsa-let-7f-1								down				1
hsa-let-7f-2								down				1
miR-125a								down				1
miR-1296								down				1
miR-1343								down				1
miR-197								down				1
miR-2110								down				1
miR-29b-2								up				1
miR-3154								down				1
miR-328								down				1
miR-3615								down				1
miR-3917								down				1
miR-423								down				1
miR-4521								down				1
miR-4788								up				1
miR-5187								down				1
miR-574								down				1
miR-605								down				1
miR-6502								down				1
miR-6511b-1								down				1
miR-6511b-2								down				1
miR-6788								down				1
miR-6802								down				1
miR-6803								down				1
miR-6820								down				1
miR-99b								down				1
miR-1248									up			1
miR-1249									up			1
miR-2277									up			1
miR-296									up			1
miR-320b-1									up			1
miR-320b-2									up			1
miR-3605									up			1
miR-3926-2									down			1
miR-4449									up			1
miR-4491									up			1
miR-4777									down			1
miR-487a									up			1
miR-543									up			1
miR-627									up			1
miR-652									down			1
miR-744									up			1
miR-769									up			1
miR-153-1										down		1
miR-3131										up		1
miR-1179											down	1
miR-4787											up	1
miR-6730											up	1
miR-6843											up	1
miR-873											down	1
miR-876											down	1

## Sheet: disconcordant DEMs
DEMs	BLCA	BRCA	HNSC	KICH	KIRC	KIRP	LIHC	LUAD	LUSC	STAD	THCA	Frequency
miR-1258	down	down	down	up			down	down	down	down	down	9
miR-135b	up	up	up	down		up	up	up	up	up		9
miR-144		down	down	up	up	up		down	down	down	down	9
miR-204	down	down	down	down	down		up		up	down		8
miR-205	up	down		down			up	up	up	down	up	8
miR-551b	up	down				up	up	up	up	down	up	8
miR-675	up	down		down	down	down		up	up	up		8
miR-1269a		up	up	down	up		up	up	up	up		8
miR-1269b		up	up	down	up		up	up	up	up		8
miR-184		up		down	down	down	up	down		up	up	8
miR-196a-1		up	up	down			up	up	up	up	up	8
miR-196a-2		up	up	down			up	up	up	up	up	8
miR-451a		down	down	up	up			down	down	down	down	8
miR-141	up	up		up	down	down		up	up			7
miR-188	up	up			down	down		up	up	up		7
miR-203b	up	up			down	down	up	up	up			7
miR-323b	up		up		down	down	up	up	up			7
miR-483	up	down		down		down	up	down		up		7
miR-615	up	up	up	down				up	up	up		7
miR-486-1		down	down	up				down	down	down	down	7
miR-486-2		down	down	up				down	down	down	down	7
miR-891a		down		up		down	up	up	up		up	7
miR-217			down	down	down	down	up	up		up		7
miR-1251	up			down	down	down	up	up				6
miR-200a	up	up			down			up	up	up		6
miR-203a	up	up			down	down			up	down		6
miR-218-1	down		down	up				down	down	down		6
miR-218-2	down		down	up				down	down	down		6
miR-3065	up	up		down	down				down		up	6
miR-33a	up	up			down	down		up	up			6
miR-33b	up	up			up		down	up	up			6
miR-584	up	down		up	up	up				up		6
miR-944	up	down	up				up		up	down		6
miR-9-1		up	up				up	up	up		down	6
miR-9-2		up	up				up	up	up		down	6
miR-9-3		up	up				up	up	up		down	6
miR-135a-1			down	down	down	down	up		down			6
miR-135a-2			down	down	down	down	up		down			6
miR-539			down	down		down	up	up	up			6
miR-508				down	down	down	up			up	up	6
miR-192	up	up		down				up	up			5
miR-200c	up	up		up	down				up			5
miR-215	up	down		down	up			up				5
miR-335	up	down		down	down					up		5
miR-345	up	up			down			up	up			5
miR-34c	up					up	up	down	down			5
miR-429	up	up			down			up	up			5
miR-433	down	down	down			down			up			5
miR-6892	down	down				up		down	down			5
miR-934	up			down	down					up	up	5
miR-375		up	down					up	down		up	5
miR-4732		down		up				down	down		down	5
miR-493		up		down			up	up	up			5
miR-6510		down	down					up	up	down		5
miR-136			down	down	down	down		up				5
miR-216a			down	down	down	down	up					5
miR-199a-1				down	down	down	down	up				5
miR-199a-2				down	down	down	down	up				5
miR-509-2				down	down	down		up			up	5
miR-514a-1				down	down	down	up				up	5
miR-514a-2				down	down	down	up				up	5
miR-514a-3				down	down	down	up				up	5
miR-10b	down	down				down	up					4
miR-138-2	up				down				down		down	4
miR-149	up				down				up	down		4
miR-200b	up	up			down				up			4
miR-29a	down		down	up					down			4
miR-3614	up	up				up	down					4
miR-431	down		down			down	up					4
miR-455	up		up	down					up			4
miR-526b	up						up	down	up			4
miR-577	up					down		up	up			4
miR-129-2		down			down	down			up			4
miR-452		down			up		up		up			4
miR-338			down			down	up		down			4
miR-369			down	down		down			up			4
miR-376a-1			down			down		up	up			4
miR-424			up				down	up	up			4
miR-487b			down	down		down		up				4
miR-496			down			down		up	up			4
miR-885			down	up	up	up						4
miR-134				down		down		up	up			4
miR-154				down		down		up	up			4
miR-216b				down	down	down	up					4
miR-3607				up			down	up	up			4
miR-485				down		down	up		up			4
miR-509-1				down	down	down					up	4
miR-509-3				down	down	down					up	4
miR-129-1					down	down			up	down		4
miR-323a					down	down		up	up			4
miR-500b					down	down	up			up		4
miR-412						down	up	up	up			4
miR-552							up	up	down	up		4
miR-138-1	up				down						down	3
miR-20b	up				down			up				3
miR-34b	up					up			down			3
miR-517a	up						up	down				3
miR-517b	up						up	down				3
miR-518b	up						up	down				3
miR-518c	up						up	down				3
miR-518e	up						up	down				3
miR-520a	up						up	down				3
miR-525	up						up	down				3
miR-494		down				down			up			3
miR-450a-1			up				down	up				3
miR-450a-2			up				down	up				3
miR-7-2			up							up	down	3
miR-889			down				up	up				3
miR-181c				down		up			down			3
miR-181d				down		up					up	3
miR-194-1				down				up		up		3
miR-194-2				down				up		up		3
miR-30d				up			up		down			3
miR-362					down	down	up					3
miR-500a					down		up			up		3
miR-501					down		up			up		3
miR-223						up			down	up		3
miR-376b						down		up	up			3
miR-5698	down							up				2
miR-7156	down										up	2
miR-1295a		down					up					2
miR-1468		down		up								2
miR-3150b		up						down				2
miR-148a			down					up				2
miR-410			down				up					2
miR-655			down					up				2
miR-1180				down			up					2
miR-15b				up				down				2
miR-382				down				up				2
miR-4484				up		down						2
miR-4662a				up		down						2
miR-598				up				down				2
miR-7641-1				up				down				2
miR-7641-2				up				down				2
miR-874				up		down						2
miR-532					down		up					2
miR-660					down		up					2
miR-489						down		up				2
miR-1226							up	down				2
miR-1306								down	up			2
miR-181a-1									down		up	2
miR-181a-2									down		up	2
miR-4709									down		up	2
