# Supplementary material for: Integrated Analysis of MicroRNA (miRNA) and mRNA Profiles Reveals Reduced Correlation between MicroRNA and Target Gene in Cancer
Source: Biomed Res Int. 2018 Dec 6;2018:1972606. doi: 10.1155/2018/1972606 (PMC6304515; doi:10.1155/2018/1972606)
Supplement: Supplementary Materials — Figure S1. Expression density distribution of mRNAs and miRNAs before and after filtering. Figure S2. Distribution of the PCC values of critical miRNA-target gene pairs in healthy controls and 4 clinically staged tumors. Figure S3: Simple correlations coefficients (Cor) and partial correlation coefficients (Pcor) of critical pairs in normal and tumor samples of LIHC. Figure S4: Simple correlations coefficients (Cor) and partial correlation coefficients (Pcor) of critical pairs in normal and tumor samples of LUAD. Figure S5: Simple correlations coefficients (Cor) and partial correlation coefficients (Pcor) of critical pairs in tumor samples of LIHC. Figure S6: Simple correlations coefficients (Pearson correlation coefficient) and partial correlation coefficients (given CNAs effects) of critical pairs in cancer samples of LUAD. Table S1: Sample sizes for each cancer type. Table S2. Sample clinical and grouping information for each cancer type. Table S3. List of DEMs for each cancer type. Table S4. List of DEGs for each cancer type. Table S5. Frequency of DEMs and DEGs in 11 cancer types. Table S6. List of critical miRNA-target gene pairs for each cancer type. Table S7: Interactional references and gene functional references for some critical miRNA-target pairs. Table S8. Frequency of critical miRNA-target pairs in 11 cancer types. Table S9. List of the significantly GO annotation terms (p < 0.05) for the critical target genes in each cancer type. Table S10. List of the significantly KEGG pathway terms (p < 0.05) for the critical target genes in each cancer type. Table S11. Partial and simple correlation coefficients for each critical pair in normal and tumor samples of LUAD and LIHC when controlling methylation or CNAs effect. [file 1972606.f1.zip › 1972606.f1/Table S6_BMRI_2598515.xlsx]

## Sheet: BLCA
miRNA	miRNA regulated status	Target gene	Gene regulate status	r_hc	p_hc	r_early	p_early	r_advanced	p_advanced	r_normal	p_normal	r_tumor	p_tumor
miR-429	up	KLHL42	down	-0.912226	5.3386e-08	-0.200562	0.0211189	-0.158651	0.00889039	-0.912226	5.3386e-08	0.0085967	0.972137
miR-200c	up	KLHL42	down	-0.911444	5.74058e-08	-0.216157	0.0127981	-0.141305	0.0199596	-0.911444	5.74058e-08	0.090471	0.712621
miR-200a	up	WWTR1	down	-0.905956	9.38952e-08	-0.589565	1.02714e-13	-0.443631	1.70417e-14	-0.905956	9.38952e-08	0.107599	0.661061
miR-205	up	KLHL5	down	-0.901283	1.39494e-07	-0.19587	0.0243968	-0.0784449	0.197962	-0.901283	1.39494e-07	0.0854135	0.728089
miR-200b	up	KLHL42	down	-0.900178	1.52743e-07	-0.220582	0.0110353	-0.145161	0.0167895	-0.900178	1.52743e-07	-0.0637438	0.79544
miR-429	up	SEC23A	down	-0.900132	1.53322e-07	-0.51901	1.8228e-10	-0.344308	5.85775e-09	-0.900132	1.53322e-07	0.031906	0.896831
miR-141	up	MKX	down	-0.900118	1.535e-07	-0.624812	1.17964e-15	-0.321418	6.26678e-08	-0.900118	1.535e-07	-0.20073	0.409942
miR-378a	down	MOGS	up	-0.897885	1.83793e-07	-0.0667382	0.447064	0.0433548	0.477242	-0.897885	1.83793e-07	-0.0798436	0.74524
miR-141	up	ZEB1	down	-0.896729	2.01429e-07	-0.570367	9.39338e-13	-0.566435	2.13629e-24	-0.896729	2.01429e-07	-0.113213	0.644461
miR-200b	up	WWTR1	down	-0.894152	2.4613e-07	-0.553448	5.88676e-12	-0.437841	4.04567e-14	-0.894152	2.4613e-07	0.0251493	0.918601
miR-200c	up	FLNA	down	-0.893851	2.51891e-07	-0.579376	3.38483e-13	-0.51062	2.12783e-19	-0.893851	2.51891e-07	0.146549	0.549392
miR-429	up	ZEB1	down	-0.892603	2.76969e-07	-0.489949	2.48394e-09	-0.37551	1.67624e-10	-0.892603	2.76969e-07	0.0293678	0.905002
miR-200c	up	PKD1	down	-0.885764	4.56968e-07	-0.0590397	0.501297	-0.268112	7.62353e-06	-0.885764	4.56968e-07	0.203818	0.402624
miR-141	up	ANGPTL7	down	-0.884899	4.85763e-07	-0.264844	0.00214862	-0.366919	4.63479e-10	-0.884899	4.85763e-07	-0.0231918	0.924919
miR-200c	up	ZEB1	down	-0.884605	4.95911e-07	-0.494024	1.74747e-09	-0.508094	3.41216e-19	-0.884605	4.95911e-07	-0.125751	0.607974
miR-141	up	ZFPM2	down	-0.881735	6.04913e-07	-0.397724	2.33146e-06	-0.391066	2.45979e-11	-0.881735	6.04913e-07	-0.682476	0.00128397
miR-429	up	ZFPM2	down	-0.879625	6.97823e-07	-0.411561	9.46017e-07	-0.292541	9.52469e-07	-0.879625	6.97823e-07	-0.670343	0.00168511
miR-205	up	KATNAL1	down	-0.879211	7.17423e-07	-0.269208	0.00180007	-0.114262	0.0603203	-0.879211	7.17423e-07	-0.167704	0.492548
miR-200a	up	ZEB1	down	-0.87556	9.12234e-07	-0.525395	9.92818e-11	-0.423815	3.07266e-13	-0.87556	9.12234e-07	-0.0515766	0.833907
miR-141	up	EPHA7	down	-0.873881	1.01619e-06	0.0152553	0.86217	-0.152315	0.0120561	-0.873881	1.01619e-06	-0.513454	0.0245453
miR-200b	up	SEC23A	down	-0.873455	1.04419e-06	-0.507664	5.20391e-10	-0.371101	2.83548e-10	-0.873455	1.04419e-06	0.00356612	0.98844
miR-141	up	COL19A1	down	-0.871833	1.15693e-06	-0.313923	0.000246855	-0.203614	0.000746793	-0.871833	1.15693e-06	-0.571614	0.0105634
miR-200b	up	ZEB1	down	-0.869386	1.34694e-06	-0.46018	2.83346e-08	-0.378168	1.21626e-10	-0.869386	1.34694e-06	-0.0653109	0.790516
miR-141	up	MYOCD	down	-0.869006	1.37874e-06	-0.172763	0.0475977	-0.239686	6.72692e-05	-0.869006	1.37874e-06	0.331979	0.16496
miR-205	up	ZEB1	down	-0.868636	1.41038e-06	-0.326302	0.000134362	-0.370219	3.14691e-10	-0.868636	1.41038e-06	-0.251543	0.298881
miR-141	up	LPP	down	-0.867819	1.48237e-06	-0.00556501	0.949504	-0.119635	0.0491356	-0.867819	1.48237e-06	0.487421	0.0342768
miR-200c	up	SEC23A	down	-0.867409	1.51969e-06	-0.5206	1.56867e-10	-0.32181	6.02743e-08	-0.867409	1.51969e-06	0.178805	0.463915
miR-200c	up	CFL2	down	-0.865385	1.71616e-06	-0.684917	1.34919e-19	-0.562699	4.94539e-24	-0.865385	1.71616e-06	-0.61037	0.00551273
miR-96	up	SSC5D	down	-0.864969	1.75916e-06	-0.426778	3.34489e-07	-0.248041	3.6419e-05	-0.864969	1.75916e-06	-0.262751	0.27713
miR-200c	up	NCAM1	down	-0.862871	1.99068e-06	-0.482938	4.50077e-09	-0.413608	1.26805e-12	-0.862871	1.99068e-06	-0.479788	0.0376327
miR-200a	up	LPP	down	-0.862654	2.016e-06	0.0221187	0.801244	-0.0228349	0.708239	-0.862654	2.016e-06	0.296713	0.21737
miR-200c	up	ZFPM2	down	-0.86052	2.28086e-06	-0.300084	0.000472568	-0.331631	2.22953e-08	-0.86052	2.28086e-06	-0.722963	0.000470042
miR-205	up	ANGPTL7	down	-0.860148	2.33005e-06	-0.289938	0.000745728	-0.282502	2.29353e-06	-0.860148	2.33005e-06	-0.021323	0.930954
miR-96	up	JAZF1	down	-0.860045	2.34377e-06	-0.468368	1.48425e-08	-0.492234	6.05932e-18	-0.860045	2.34377e-06	0.115857	0.636697
miR-200c	up	ROCK2	down	-0.858914	2.49969e-06	-0.106505	0.224188	-0.0276107	0.650898	-0.858914	2.49969e-06	0.254798	0.29246
miR-205	up	SYT11	down	-0.858487	2.56083e-06	-0.415553	7.2373e-07	-0.455604	2.70429e-15	-0.858487	2.56083e-06	-0.536526	0.0178706
miR-142	up	FYCO1	down	-0.85809	2.6188e-06	-0.231896	0.00746136	-0.158193	0.00909161	-0.85809	2.6188e-06	0.184998	0.448317
miR-181b-2	up	CLIC4	down	-0.858088	2.61917e-06	0.00142693	0.987044	0.154093	0.0110801	-0.858088	2.61917e-06	0.00960064	0.968884
miR-182	up	CBX6	down	-0.855456	3.03329e-06	0.0616231	0.482723	-0.131496	0.0304572	-0.855456	3.03329e-06	-0.129028	0.598576
miR-96	up	MITF	down	-0.855016	3.10778e-06	-0.414462	7.78994e-07	-0.390462	2.65533e-11	-0.855016	3.10778e-06	-0.378454	0.110101
miR-200b	up	ZFPM2	down	-0.854149	3.25929e-06	-0.387256	4.49224e-06	-0.258993	1.57629e-05	-0.854149	3.25929e-06	-0.682716	0.00127694
miR-200b	up	ROCK2	down	-0.852599	3.54616e-06	-0.0917878	0.295218	-0.0385158	0.52781	-0.852599	3.54616e-06	0.326476	0.172507
miR-200a	up	ZFPM2	down	-0.852538	3.55768e-06	-0.419364	5.58626e-07	-0.30567	2.86579e-07	-0.852538	3.55768e-06	-0.676698	0.00146368
miR-200b	up	FERMT2	down	-0.851841	3.6941e-06	-0.598309	3.56795e-14	-0.477585	7.58964e-17	-0.851841	3.6941e-06	-0.402911	0.0871926
miR-96	up	SYNM	down	-0.851585	3.74514e-06	-0.527257	8.29603e-11	-0.391316	2.38306e-11	-0.851585	3.74514e-06	-0.338989	0.155679
miR-182	up	PPP1R12A	down	-0.85127	3.80911e-06	-0.217425	0.0122694	-0.190563	0.00162435	-0.85127	3.80911e-06	-0.106501	0.664325
miR-200a	up	ANGPTL7	down	-0.851035	3.8572e-06	-0.294456	0.000609892	-0.269537	6.78938e-06	-0.851035	3.8572e-06	-0.184849	0.448689
miR-145	down	RTKN	up	-0.85052	3.96488e-06	0.0454809	0.604574	-0.0323218	0.596276	-0.85052	3.96488e-06	-0.0572902	0.815793
miR-141	up	GATA6	down	-0.846746	4.83507e-06	-0.421022	4.98625e-07	-0.41389	1.22019e-12	-0.846746	4.83507e-06	-0.128919	0.598888
miR-96	up	PPP1R12A	down	-0.845863	5.06089e-06	-0.211073	0.0151233	-0.270583	6.23279e-06	-0.845863	5.06089e-06	-0.0505935	0.837032
miR-365b	down	RAB17	up	-0.845754	5.08955e-06	-0.191404	0.0279127	-0.0599502	0.325496	-0.845754	5.08955e-06	-0.301482	0.209715
miR-365a	down	RAB17	up	-0.845568	5.13835e-06	-0.189396	0.0296282	-0.0577899	0.343264	-0.845568	5.13835e-06	-0.303736	0.206159
miR-142	up	RNF38	down	-0.844356	5.46789e-06	0.152575	0.0807208	0.0348938	0.56736	-0.844356	5.46789e-06	-0.138209	0.572578
miR-27b	down	UBXN11	up	-0.844283	5.48801e-06	-0.250294	0.00379732	-0.0571356	0.348764	-0.844283	5.48801e-06	-0.00449695	0.985423
miR-182	up	SYNM	down	-0.843509	5.70857e-06	-0.469559	1.3492e-08	-0.323123	5.28781e-08	-0.843509	5.70857e-06	-0.221781	0.361491
miR-200a	up	EPHA7	down	-0.840563	6.6189e-06	0.115549	0.18705	0.109541	0.0718044	-0.840563	6.6189e-06	-0.319651	0.182185
miR-141	up	PRKAA2	down	-0.839834	6.86252e-06	-0.163828	0.0605127	-0.141568	0.0197276	-0.839834	6.86252e-06	-0.424056	0.0703851
miR-200a	up	RAB30	down	-0.837282	7.77768e-06	-0.489045	2.68384e-09	-0.237136	8.07784e-05	-0.837282	7.77768e-06	-0.438796	0.0601848
miR-181b-2	up	LONRF2	down	-0.83714	7.83165e-06	0.0140145	0.873282	-0.243254	5.18968e-05	-0.83714	7.83165e-06	-0.192066	0.430852
miR-584	up	FYN	down	-0.835376	8.52851e-06	-0.348379	4.24917e-05	-0.287716	1.45919e-06	-0.835376	8.52851e-06	-0.195094	0.42348
miR-200a	up	PRKAA2	down	-0.833241	9.44253e-06	-0.126723	0.147634	-0.11862	0.0511042	-0.833241	9.44253e-06	-0.512008	0.0250209
miR-141	up	KLF11	down	-0.833162	9.47823e-06	-0.17122	0.0496482	-0.178681	0.00316075	-0.833162	9.47823e-06	-0.566855	0.0113814
miR-141	up	PRSS23	down	-0.830196	1.08925e-05	-0.321177	0.000173393	-0.344571	5.69419e-09	-0.830196	1.08925e-05	0.364088	0.125415
miR-133b	down	FSCN1	up	-0.829693	1.11493e-05	0.14425	0.0989051	-0.135431	0.0257842	-0.829693	1.11493e-05	-0.495565	0.0309572
miR-141	up	HSPA2	down	-0.829422	1.12902e-05	0.0506663	0.563976	-0.121065	0.0464707	-0.829422	1.12902e-05	-0.236783	0.329056
miR-200c	up	KLF11	down	-0.829098	1.14606e-05	-0.149278	0.087573	-0.13222	0.029547	-0.829098	1.14606e-05	-0.47363	0.0405201
miR-378a	down	CHTF18	up	-0.826913	1.26672e-05	-0.12246	0.161857	0.0842785	0.166527	-0.826913	1.26672e-05	0.145111	0.553359
miR-96	up	ZEB1	down	-0.825257	1.36531e-05	-0.370148	1.25148e-05	-0.456837	2.22786e-15	-0.825257	1.36531e-05	-0.299957	0.212144
miR-365a	down	RAB11FIP4	up	-0.824535	1.41027e-05	-0.172812	0.0475344	-0.0504191	0.408411	-0.824535	1.41027e-05	-0.229819	0.343893
miR-365b	down	RAB11FIP4	up	-0.823554	1.47351e-05	-0.176568	0.0428403	-0.0516184	0.397339	-0.823554	1.47351e-05	-0.229906	0.343705
miR-31	up	RAB27A	down	-0.822301	1.55775e-05	0.0682252	0.436983	0.142354	0.0190495	-0.822301	1.55775e-05	0.321008	0.180233
miR-143	down	PROSER2	up	-0.820698	1.67163e-05	0.0970818	0.268123	-0.0586735	0.335923	-0.820698	1.67163e-05	-0.133202	0.586696
miR-200a	up	GATA6	down	-0.818687	1.82449e-05	-0.469904	1.31225e-08	-0.324083	4.80319e-08	-0.818687	1.82449e-05	-0.147713	0.546189
miR-200c	up	RASSF2	down	-0.81744	1.92524e-05	-0.0619628	0.480309	-0.198279	0.00103208	-0.81744	1.92524e-05	-0.0980232	0.689724
miR-141	up	ZEB2	down	-0.817269	1.93943e-05	-0.681987	2.20802e-19	-0.648245	1.07507e-33	-0.817269	1.93943e-05	-0.21921	0.367225
miR-96	up	CCND2	down	-0.816103	2.03853e-05	-0.374309	9.80644e-06	-0.245576	4.37434e-05	-0.816103	2.03853e-05	0.314076	0.190359
miR-142	up	LPP	down	-0.815895	2.05665e-05	-0.199825	0.0216078	-0.103574	0.0888041	-0.815895	2.05665e-05	0.117612	0.631566
miR-429	up	GATA6	down	-0.812608	2.36215e-05	-0.467503	1.59044e-08	-0.32587	4.01257e-08	-0.812608	2.36215e-05	-0.209965	0.388269
miR-28	down	PRSS16	up	-0.812437	2.37898e-05	-0.0574936	0.51259	-0.0215987	0.723371	-0.812437	2.37898e-05	-0.317549	0.18524
miR-182	up	CCND2	down	-0.810943	2.53118e-05	-0.367623	1.44881e-05	-0.216094	0.000339218	-0.810943	2.53118e-05	0.0709694	0.772802
miR-142	up	ROCK2	down	-0.810935	2.53202e-05	0.100665	0.250774	-0.156559	0.00984254	-0.810935	2.53202e-05	-0.0597784	0.807932
miR-183	up	FNBP1	down	-0.81093	2.53256e-05	-0.317908	0.000203538	-0.324093	4.79818e-08	-0.81093	2.53256e-05	-0.153234	0.531117
miR-205	up	STARD8	down	-0.808953	2.74688e-05	-0.468607	1.45614e-08	-0.492117	6.18599e-18	-0.808953	2.74688e-05	-0.390851	0.0980053
miR-182	up	MITF	down	-0.806969	2.97741e-05	-0.337898	7.41942e-05	-0.278393	3.25444e-06	-0.806969	2.97741e-05	-0.290358	0.227852
miR-200a	up	KLF11	down	-0.805937	3.10375e-05	-0.214189	0.0136581	-0.113997	0.0609206	-0.805937	3.10375e-05	-0.471891	0.0413658
miR-182	up	TTC28	down	-0.801189	3.74614e-05	0.112829	0.197713	0.0571165	0.348926	-0.801189	3.74614e-05	0.514818	0.0241028
miR-143	down	FSCN1	up	-0.800961	3.77975e-05	0.202834	0.0196733	-0.0445088	0.465585	-0.800961	3.77975e-05	-0.563678	0.0119554
miR-205	up	WDR17	down	-0.800753	3.81056e-05	-0.176474	0.0429538	-0.179138	0.00308317	-0.800753	3.81056e-05	-0.525327	0.020902
miR-141	up	RASSF2	down	-0.799287	4.03391e-05	-0.0462374	0.598571	-0.22899	0.000143026	-0.799287	4.03391e-05	-0.0869141	0.723488
miR-200b	up	RASSF2	down	-0.798835	4.10486e-05	-0.0440711	0.615832	-0.0460454	0.450309	-0.798835	4.10486e-05	0.0900321	0.713959
miR-200c	up	GATA6	down	-0.798302	4.19005e-05	-0.400117	2.00042e-06	-0.39174	2.25833e-11	-0.798302	4.19005e-05	-0.23594	0.330831
miR-708	up	ASXL3	down	-0.797531	4.31606e-05	0.109468	0.211485	0.133421	0.0280872	-0.797531	4.31606e-05	-0.24266	0.316832
miR-32	up	ITPR1	down	-0.796124	4.5542e-05	0.112538	0.198877	-0.00856984	0.888322	-0.796124	4.5542e-05	0.0841064	0.732103
miR-96	up	ALPK3	down	-0.795504	4.66269e-05	0.0549525	0.53143	-0.130919	0.0312001	-0.795504	4.66269e-05	-0.0625601	0.799164
miR-429	up	KLF11	down	-0.795101	4.73443e-05	-0.214272	0.0136209	-0.137702	0.0233783	-0.795101	4.73443e-05	-0.393077	0.09594
miR-429	up	KIF13A	down	-0.792955	5.13219e-05	-0.197329	0.0233337	-0.211975	0.000442363	-0.792955	5.13219e-05	0.223782	0.357063
miR-183	up	C16orf45	down	-0.791256	5.4673e-05	-0.0712818	0.416671	-0.220624	0.000251873	-0.791256	5.4673e-05	-0.404954	0.0854516
miR-142	up	CC2D2A	down	-0.790589	5.60375e-05	-0.0681203	0.437689	-0.114126	0.0606272	-0.790589	5.60375e-05	-0.531479	0.0191903
miR-708	up	KLHL15	down	-0.789846	5.75942e-05	0.088534	0.312741	-0.0928738	0.127227	-0.789846	5.75942e-05	-0.04081	0.868252
miR-200b	up	GATA6	down	-0.789286	5.87908e-05	-0.456237	3.84511e-08	-0.298229	5.70208e-07	-0.789286	5.87908e-05	-0.202615	0.405464
miR-32	up	SETBP1	down	-0.789142	5.91022e-05	-0.234495	0.00680255	-0.121824	0.0451042	-0.789142	5.91022e-05	-0.309909	0.196626
miR-200c	up	KIF13A	down	-0.788962	5.9492e-05	-0.0844148	0.335875	-0.0497256	0.414896	-0.788962	5.9492e-05	0.457144	0.0490922
miR-429	up	ZEB2	down	-0.788343	6.08541e-05	-0.69005	5.61202e-20	-0.543495	3.14152e-22	-0.788343	6.08541e-05	-0.100122	0.683404
miR-200c	up	ZEB2	down	-0.787612	6.24952e-05	-0.62365	1.37931e-15	-0.624302	1.09475e-30	-0.787612	6.24952e-05	-0.247358	0.307261
miR-429	up	ZFHX4	down	-0.78755	6.26355e-05	-0.282328	0.00103867	-0.287939	1.43099e-06	-0.78755	6.26355e-05	-0.346712	0.145879
miR-200a	up	RASSF2	down	-0.787414	6.29472e-05	-0.0563815	0.520793	-0.0753862	0.216073	-0.787414	6.29472e-05	0.0835976	0.733667
miR-183	up	ITPKB	down	-0.786626	6.47702e-05	-0.0460274	0.600235	-0.296546	6.64465e-07	-0.786626	6.47702e-05	-0.272271	0.259447
miR-32	up	TACC1	down	-0.784837	6.90771e-05	0.107789	0.218619	-0.063282	0.29928	-0.784837	6.90771e-05	0.00803766	0.973948
miR-183	up	TMEM108	down	-0.784543	6.98093e-05	-0.130393	0.136166	-0.16539	0.00635474	-0.784543	6.98093e-05	0.115691	0.637184
miR-200c	up	ZFHX4	down	-0.783551	7.23218e-05	-0.422581	4.47848e-07	-0.339366	9.93436e-09	-0.783551	7.23218e-05	-0.432772	0.0642096
miR-142	up	ATXN1	down	-0.782886	7.40518e-05	0.256773	0.00295828	0.311175	1.70145e-07	-0.782886	7.40518e-05	0.0906064	0.712208
miR-32	up	ATXN1	down	-0.781752	7.70824e-05	-0.149103	0.0879471	-0.1696	0.00512032	-0.781752	7.70824e-05	-0.453843	0.0509628
miR-200b	up	KLF11	down	-0.780914	7.93883e-05	-0.189282	0.0297284	-0.110622	0.0690285	-0.780914	7.93883e-05	-0.461263	0.0468319
miR-183	up	KY	down	-0.780153	8.15351e-05	-0.205044	0.0183499	-0.222006	0.000229724	-0.780153	8.15351e-05	-0.187256	0.442699
miR-142	up	ZEB1	down	-0.780111	8.1655e-05	0.35425	3.08267e-05	0.154424	0.0109063	-0.780111	8.1655e-05	0.0363301	0.882614
miR-183	up	STK33	down	-0.778541	8.62427e-05	-0.162539	0.0625933	-0.0255386	0.675549	-0.778541	8.62427e-05	0.174734	0.474316
miR-944	up	PDE5A	down	-0.778274	8.70472e-05	-0.363599	1.82483e-05	-0.30923	2.04815e-07	-0.778274	8.70472e-05	0.047904	0.845593
miR-1262	down	AGMAT	up	-0.778033	8.77745e-05	-0.167407	0.0550313	-0.0516656	0.396907	-0.778033	8.77745e-05	-0.241017	0.320221
miR-205	up	ITGA5	down	-0.775882	9.45192e-05	-0.17211	0.0484568	-0.173558	0.00416099	-0.775882	9.45192e-05	0.0809624	0.741786
miR-32	up	MYZAP	down	-0.775718	9.50515e-05	0.0379232	0.665948	-0.025932	0.670842	-0.775718	9.50515e-05	0.370684	0.118207
miR-200b	up	RAB23	down	-0.77547	9.58614e-05	-0.453505	4.74058e-08	-0.217478	0.00030992	-0.77547	9.58614e-05	0.0527444	0.830198
miR-96	up	ATXN1	down	-0.774955	9.75596e-05	-0.30773	0.000331405	-0.363342	7.01644e-10	-0.774955	9.75596e-05	0.114584	0.640432
miR-32	up	CC2D2A	down	-0.774835	9.79594e-05	0.024342	0.781742	-0.130032	0.0323711	-0.774835	9.79594e-05	-0.193644	0.427001
miR-200a	up	ZEB2	down	-0.774459	9.9222e-05	-0.712977	8.83812e-22	-0.577337	1.73433e-25	-0.774459	9.9222e-05	-0.229253	0.345114
miR-142	up	CLIC4	down	-0.772533	0.000105903	0.504335	7.02889e-10	0.321185	6.41389e-08	-0.772533	0.000105903	0.0280063	0.909388
miR-6892	down	FAM110A	up	-0.772149	0.000107277	-0.127031	0.146645	-0.111583	0.0666343	-0.772149	0.000107277	-0.0632256	0.79707
miR-32	up	ATP2B4	down	-0.771576	0.00010936	-0.324601	0.000146306	-0.203631	0.000746006	-0.771576	0.00010936	-0.0219435	0.92895
miR-200c	up	KCNE4	down	-0.771544	0.000109479	-0.410693	1.00226e-06	-0.445472	1.28995e-14	-0.771544	0.000109479	-0.371841	0.116973
miR-181b-2	up	FSTL1	down	-0.770386	0.000113795	0.141862	0.104677	0.0736094	0.227124	-0.770386	0.000113795	-0.367526	0.12162
miR-145	down	MMP1	up	-0.77019	0.000114542	0.2209	0.0109173	-0.00719354	0.906167	-0.77019	0.000114542	-0.168779	0.489737
miR-145	down	RAB3IP	up	-0.769992	0.000115297	-0.058632	0.504263	-0.145654	0.0164174	-0.769992	0.000115297	-0.143841	0.556875
miR-200b	up	ZEB2	down	-0.769195	0.000118391	-0.67703	5.01649e-19	-0.544394	2.60162e-22	-0.769195	0.000118391	-0.217373	0.371355
miR-642a	up	FER	down	-0.768284	0.000122007	-0.00948949	0.914003	-0.141504	0.0197836	-0.768284	0.000122007	0.176623	0.469475
miR-195	down	TMC6	up	-0.767567	0.000124922	-0.0600363	0.494088	-0.0260608	0.669303	-0.767567	0.000124922	0.253932	0.294159
miR-182	up	PRKAA2	down	-0.766848	0.000127904	-0.181448	0.0373275	-0.0131056	0.829956	-0.766848	0.000127904	-0.132703	0.588112
miR-183	up	FBXO32	down	-0.766368	0.000129928	-0.370254	1.24377e-05	-0.434539	6.57595e-14	-0.766368	0.000129928	-0.294494	0.220994
miR-32	up	BMPR1A	down	-0.766326	0.000130105	-0.111901	0.201451	-0.132373	0.0293573	-0.766326	0.000130105	-0.101773	0.678448
miR-142	up	RCAN2	down	-0.76608	0.000131157	0.0907335	0.300823	-0.00643818	0.915981	-0.76608	0.000131157	0.00938692	0.969576
miR-142	up	TMEM245	down	-0.765286	0.000134589	-0.0863504	0.324873	0.0277868	0.64882	-0.765286	0.000134589	0.344093	0.149154
miR-142	up	CREBRF	down	-0.764392	0.000138548	-0.17921	0.0397767	-0.0111833	0.854599	-0.764392	0.000138548	0.0405006	0.869243
miR-141	up	DOK6	down	-0.764193	0.000139443	-0.201619	0.0204355	-0.30618	2.73203e-07	-0.764193	0.000139443	0.145774	0.551528
miR-335	up	TCEAL7	down	-0.763345	0.000143314	-0.0578297	0.510124	-0.0346158	0.570453	-0.763345	0.000143314	0.173889	0.476489
miR-6892	down	MTG1	up	-0.763066	0.000144606	-0.191812	0.0275742	-0.144974	0.0169325	-0.763066	0.000144606	-0.0432019	0.860601
miR-32	up	KIAA1614	down	-0.762252	0.000148433	-0.0648197	0.460262	-0.116518	0.0553924	-0.762252	0.000148433	-0.22871	0.34629
miR-708	up	ZEB2	down	-0.760784	0.000155555	0.0842045	0.337085	0.234623	9.65522e-05	-0.760784	0.000155555	-0.228413	0.346935
miR-205	up	ZEB2	down	-0.759753	0.000160729	-0.403863	1.57037e-06	-0.379153	1.0791e-10	-0.759753	0.000160729	-0.415917	0.0765407
miR-200b	up	KIF13A	down	-0.759499	0.000162028	-0.165612	0.0577269	-0.197184	0.00110181	-0.759499	0.000162028	0.26821	0.2669
miR-6499	up	C3	down	-0.75897	0.000164758	-0.0185177	0.833085	-0.0626921	0.303816	-0.75897	0.000164758	0.311141	0.194759
miR-429	up	RASSF2	down	-0.758844	0.000165412	-0.0333847	0.703932	-0.0469187	0.441755	-0.758844	0.000165412	0.150031	0.539837
miR-32	up	MAP1B	down	-0.758774	0.000165779	-0.0810281	0.35569	-0.215861	0.0003444	-0.758774	0.000165779	-0.113784	0.642782
miR-205	up	TMEM245	down	-0.756995	0.000175298	-0.10607	0.226096	-0.108443	0.074715	-0.756995	0.000175298	-0.0635775	0.795963
miR-142	up	BAG2	down	-0.756858	0.000176047	0.474948	8.71896e-09	0.200325	0.000912527	-0.756858	0.000176047	-0.38908	0.0996713
miR-200b	up	ZFHX4	down	-0.756806	0.000176333	-0.301622	0.000440365	-0.275035	4.31411e-06	-0.756806	0.000176333	-0.341136	0.15291
miR-429	up	FKBP5	down	-0.755435	0.000184023	-0.683192	1.80453e-19	-0.573815	3.94409e-25	-0.755435	0.000184023	-0.181699	0.456593
miR-23b	down	OCIAD2	up	-0.754971	0.00018669	0.0697961	0.426474	-0.160553	0.00809636	-0.754971	0.00018669	0.380697	0.107836
miR-584	up	GSN	down	-0.754911	0.000187036	0.035238	0.688326	0.00981774	0.87219	-0.754911	0.000187036	0.218978	0.367745
miR-28	down	YDJC	up	-0.754604	0.000188818	-0.105686	0.227789	-0.0359734	0.555425	-0.754604	0.000188818	0.476958	0.0389391
miR-182	up	CTNNA3	down	-0.752383	0.000202168	0.011754	0.89359	-0.0231768	0.704075	-0.752383	0.000202168	0.0610445	0.803938
miR-183	up	TMEM245	down	-0.752163	0.000203529	-0.0962503	0.272263	0.0512985	0.400275	-0.752163	0.000203529	-0.277611	0.249845
miR-205	up	ALPK3	down	-0.748881	0.000224836	-0.0246851	0.778745	-0.22871	0.000145805	-0.748881	0.000224836	0.0801995	0.744141
miR-139	down	TMPRSS12	up	-0.748228	0.000229296	-0.0728474	0.406484	0.0113432	0.852543	-0.748228	0.000229296	0.328382	0.169867
miR-183	up	ZEB1	down	-0.747948	0.00023123	-0.406263	1.34268e-06	-0.400906	6.92923e-12	-0.747948	0.00023123	-0.184221	0.450258
miR-142	up	PDZRN4	down	-0.746998	0.000237897	0.247604	0.00420428	-0.0395754	0.516509	-0.746998	0.000237897	-0.251686	0.298597
miR-32	up	KLHL42	down	-0.746327	0.000242701	-0.153156	0.0795594	-0.181437	0.0027181	-0.746327	0.000242701	-0.302339	0.208358
miR-142	up	INPP5A	down	-0.744355	0.000257309	-0.433028	2.14993e-07	-0.207155	0.000599709	-0.744355	0.000257309	-0.0769342	0.754246
miR-141	up	WASF3	down	-0.744299	0.000257733	-0.0995354	0.256157	-0.0878687	0.149131	-0.744299	0.000257733	-0.406922	0.0837985
miR-183	up	ERC1	down	-0.744158	0.000258809	-0.270559	0.00170307	-0.240377	6.39943e-05	-0.744158	0.000258809	-0.127537	0.602845
miR-182	up	PPM1L	down	-0.74408	0.000259407	0.239806	0.00561442	0.259418	1.52471e-05	-0.74408	0.000259407	-0.189388	0.437426
miR-205	up	RCAN2	down	-0.743817	0.000261421	-0.289451	0.000761921	-0.369909	3.26411e-10	-0.743817	0.000261421	-0.413099	0.0787629
miR-429	up	TPD52L1	down	-0.74345	0.000264257	-0.341552	6.12276e-05	-0.121156	0.0463044	-0.74345	0.000264257	-0.277275	0.250443
miR-6892	down	UNC13D	up	-0.742926	0.000268353	0.00707755	0.935806	-0.0493596	0.418343	-0.742926	0.000268353	0.113507	0.643595
miR-32	up	LONRF3	down	-0.740501	0.000288013	-0.0750492	0.39241	-0.108933	0.0734037	-0.740501	0.000288013	0.21933	0.366958
miR-23b	down	CATSPERB	up	-0.740219	0.000290378	0.0750204	0.392592	0.112601	0.0641747	-0.740219	0.000290378	0.385342	0.103255
miR-32	up	NCALD	down	-0.736226	0.000325654	-0.158385	0.069699	-0.221646	0.000235314	-0.736226	0.000325654	-0.138313	0.572286
miR-642a	up	CHRM2	down	-0.735056	0.000336661	-0.22076	0.010969	-0.252269	2.64757e-05	-0.735056	0.000336661	-0.512173	0.0249664
miR-944	up	DPYSL2	down	-0.734088	0.000345996	-0.439811	1.31727e-07	-0.506208	4.8419e-19	-0.734088	0.000345996	-0.696899	0.000914101
miR-200c	up	FBLN5	down	-0.73355	0.000351273	-0.268163	0.00187847	-0.333114	1.91259e-08	-0.73355	0.000351273	0.244436	0.313194
miR-23b	down	CENPM	up	-0.731076	0.000376467	-0.261485	0.00245745	-0.279302	3.01332e-06	-0.731076	0.000376467	-0.29361	0.222447
miR-200c	up	RASSF8	down	-0.730952	0.000377763	-0.389033	4.02526e-06	-0.315824	1.08631e-07	-0.730952	0.000377763	-0.0246599	0.92018
miR-183	up	NEGR1	down	-0.728853	0.000400378	-0.37913	7.36079e-06	-0.272634	5.26508e-06	-0.728853	0.000400378	-0.0933246	0.70394
miR-142	up	RPS6KA5	down	-0.72818	0.000407866	-0.120147	0.169992	-0.145532	0.0165092	-0.72818	0.000407866	0.0451094	0.854507
miR-17	up	KATNAL1	down	-0.727876	0.00041129	0.069504	0.428417	0.00550055	0.928182	-0.727876	0.00041129	0.297397	0.216261
miR-145	down	FSCN1	up	-0.727681	0.000413496	0.0808644	0.356667	-0.0557761	0.360371	-0.727681	0.000413496	-0.350052	0.141776
miR-182	up	PCOLCE2	down	-0.727531	0.000415204	-0.35443	3.05207e-05	-0.315681	1.10155e-07	-0.727531	0.000415204	-0.218631	0.368524
miR-708	up	AKT3	down	-0.727462	0.000415986	-0.0780528	0.373688	0.16968	0.00509893	-0.727462	0.000415986	-0.435941	0.062068
miR-149	up	PGM2L1	down	-0.727418	0.000416485	-0.140383	0.108384	-0.123769	0.0417592	-0.727418	0.000416485	0.335803	0.159852
miR-182	up	SYDE2	down	-0.727316	0.000417657	0.257177	0.00291202	0.159918	0.0083541	-0.727316	0.000417657	0.235833	0.331056
miR-135b	up	MBNL1	down	-0.727246	0.000418458	0.0262297	0.76529	-0.0124674	0.838121	-0.727246	0.000418458	-0.120872	0.622073
miR-183	up	SH3D19	down	-0.727218	0.000418783	-0.027156	0.757255	-0.066377	0.276218	-0.727218	0.000418783	-0.273141	0.257866
miR-195	down	KRT7	up	-0.727098	0.000420152	-0.0905899	0.301592	0.0230319	0.705839	-0.727098	0.000420152	0.0898294	0.714577
miR-6892	down	KCNC3	up	-0.726938	0.000422004	-0.120432	0.168972	-0.0850077	0.162877	-0.726938	0.000422004	-0.156818	0.521437
miR-200b	up	FKBP5	down	-0.726782	0.000423798	-0.686112	1.10183e-19	-0.565597	2.58141e-24	-0.726782	0.000423798	-0.230224	0.343019
miR-224	up	MITF	down	-0.726197	0.000430623	-0.220385	0.0111092	-0.0177865	0.77069	-0.726197	0.000430623	0.51365	0.0244812
miR-195	down	AGMAT	up	-0.726031	0.000432586	-0.0187957	0.830616	-0.085261	0.161623	-0.726031	0.000432586	-0.165008	0.499628
miR-17	up	FER	down	-0.725818	0.000435101	0.0782078	0.372736	-0.0507276	0.405546	-0.725818	0.000435101	-0.0431116	0.860889
miR-429	up	RASSF8	down	-0.725803	0.000435273	-0.527128	8.40035e-11	-0.367082	4.54753e-10	-0.725803	0.000435273	-0.213278	0.380654
miR-96	up	HTR1B	down	-0.725721	0.000436251	-0.190279	0.0288633	-0.317198	9.50078e-08	-0.725721	0.000436251	-0.0818662	0.738998
miR-335	up	COLEC12	down	-0.724195	0.000454684	-0.202386	0.0199516	-0.121939	0.0449003	-0.724195	0.000454684	0.0308273	0.900302
miR-142	up	TBX4	down	-0.723495	0.000463356	0.0515026	0.557552	-0.0732023	0.229711	-0.723495	0.000463356	-0.361527	0.128295
miR-181b-2	up	FAM124A	down	-0.720886	0.00049693	0.0294471	0.737492	-0.183508	0.00242332	-0.720886	0.00049693	-0.110193	0.653371
miR-182	up	SMARCD3	down	-0.719796	0.000511559	0.0108857	0.901409	-0.0312677	0.608317	-0.719796	0.000511559	0.10736	0.661772
miR-142	up	STX2	down	-0.719375	0.000517297	0.509463	4.41769e-10	0.273289	4.98747e-06	-0.719375	0.000517297	-0.133527	0.585774
miR-378c	down	RCC2	up	-0.719214	0.000519512	-0.224243	0.00974204	-0.122318	0.0442348	-0.719214	0.000519512	-0.287491	0.232685
miR-1262	down	XRCC3	up	-0.718762	0.000525761	0.148177	0.0899604	-0.0270857	0.657109	-0.718762	0.000525761	-0.0395998	0.872129
let-7c	down	OLR1	up	-0.718735	0.000526133	0.269788	0.00175781	0.1856	0.00215544	-0.718735	0.000526133	-0.335672	0.160026
miR-17	up	FAXC	down	-0.716874	0.000552557	0.165837	0.0573834	0.0921418	0.130266	-0.716874	0.000552557	0.303438	0.206627
miR-6499	up	CCDC80	down	-0.716303	0.000560882	-0.0703927	0.422522	-0.202853	0.000782449	-0.716303	0.000560882	-0.168513	0.490433
miR-142	up	NAP1L2	down	-0.71605	0.000564617	0.110763	0.2061	-0.106906	0.0789529	-0.71605	0.000564617	-0.161752	0.508244
miR-335	up	OLFML3	down	-0.715964	0.000565887	-0.231995	0.00743543	-0.196886	0.00112153	-0.715964	0.000565887	-0.241767	0.318673
miR-100	down	PLK1	up	-0.715912	0.000566649	0.121471	0.165301	-0.192713	0.00143401	-0.715912	0.000566649	-0.431666	0.0649695
miR-143	down	C2orf15	up	-0.715756	0.000568968	-0.359931	2.24598e-05	-0.132215	0.0295528	-0.715756	0.000568968	0.00673727	0.978162
miR-203b	up	RAB30	down	-0.715533	0.000572291	-0.22214	0.0104675	-0.0999306	0.100679	-0.715533	0.000572291	0.203432	0.403532
miR-32	up	SETD7	down	-0.715493	0.000572887	0.0592034	0.50011	-0.175708	0.00371076	-0.715493	0.000572887	-0.0959265	0.696056
miR-149	up	AQP2	down	-0.715366	0.000574788	-0.126404	0.148665	-0.114768	0.0591826	-0.715366	0.000574788	-0.0102829	0.966674
miR-142	up	ABCC9	down	-0.715232	0.000576792	0.330949	0.000106205	0.175756	0.00370133	-0.715232	0.000576792	-0.253044	0.295909
miR-183	up	FAM110B	down	-0.715005	0.000580214	-0.27771	0.00126431	-0.259817	1.4777e-05	-0.715005	0.000580214	0.106913	0.663101
miR-32	up	SMTN	down	-0.714942	0.000581176	-0.127632	0.144731	-0.193606	0.00136105	-0.714942	0.000581176	-0.0743165	0.762374
miR-642a	up	DOK6	down	-0.714793	0.000583417	-0.285099	0.000921607	-0.317158	9.53734e-08	-0.714793	0.000583417	-0.192013	0.43098
miR-335	up	FREM1	down	-0.714478	0.000588214	0.0807838	0.357148	0.1558	0.0102097	-0.714478	0.000588214	-0.0213114	0.930992
miR-205	up	LRRK2	down	-0.714033	0.000595055	-0.327305	0.000127755	-0.223684	0.000205284	-0.714033	0.000595055	0.143534	0.557726
miR-200a	up	WASF3	down	-0.71402	0.000595254	0.00580749	0.947307	-0.0339035	0.578414	-0.71402	0.000595254	-0.241954	0.318286
miR-183	up	NHSL2	down	-0.713052	0.000610342	-0.0566029	0.519154	-0.19649	0.00114821	-0.713052	0.000610342	0.0591842	0.809808
miR-203a	up	EDNRA	down	-0.712817	0.000614068	-0.0883735	0.313622	-0.157046	0.00961325	-0.712817	0.000614068	0.536667	0.0178348
miR-429	up	WASF3	down	-0.712583	0.000617773	0.0787581	0.369372	-0.0206026	0.735642	-0.712583	0.000617773	-0.230248	0.342967
miR-365b	down	SIX4	up	-0.712279	0.000622644	-0.416551	6.76518e-07	-0.148362	0.0145012	-0.712279	0.000622644	0.0740516	0.763198
miR-365a	down	SIX4	up	-0.712197	0.000623958	-0.416114	6.96805e-07	-0.147046	0.0154067	-0.712197	0.000623958	0.0695194	0.777332
miR-96	up	CDON	down	-0.71163	0.000633112	-0.311277	0.000280183	-0.192114	0.00148482	-0.71163	0.000633112	-0.1352	0.581047
miR-200b	up	TPD52L1	down	-0.710964	0.000644018	-0.32028	0.000181216	-0.117866	0.0526086	-0.710964	0.000644018	-0.183992	0.450831
miR-142	up	PDE4D	down	-0.705122	0.000746634	-0.0537239	0.540662	0.127351	0.0361442	-0.705122	0.000746634	0.16869	0.489969
miR-195	down	TARBP2	up	-0.705088	0.000747261	-0.222794	0.010237	-0.141837	0.0194935	-0.705088	0.000747261	-0.0569111	0.816992
miR-6499	up	GPR155	down	-0.704763	0.000753361	-0.0988339	0.259541	-0.0473657	0.437413	-0.704763	0.000753361	0.27776	0.249581
miR-32	up	FAM129A	down	-0.704398	0.000760247	-0.223878	0.0098647	-0.156811	0.00972333	-0.704398	0.000760247	-0.327085	0.17166
miR-32	up	VLDLR	down	-0.704275	0.00076259	-0.192664	0.0268791	-0.066706	0.27384	-0.704275	0.00076259	-0.0320244	0.89645
miR-142	up	ALG9	down	-0.703639	0.000774753	0.0256047	0.770726	-0.11308	0.0630418	-0.703639	0.000774753	0.00115825	0.996245
miR-203a	up	NCALD	down	-0.703028	0.000786612	-0.180557	0.0382873	-0.202895	0.000780404	-0.703028	0.000786612	-0.360918	0.128987
miR-96	up	CLIP4	down	-0.702867	0.000789755	-0.3785	7.64423e-06	-0.164441	0.00666725	-0.702867	0.000789755	-0.0689917	0.778982
miR-200b	up	RASSF8	down	-0.701437	0.000818175	-0.518611	1.89253e-10	-0.374948	1.79305e-10	-0.701437	0.000818175	-0.297227	0.216536
miR-142	up	AK4	down	-0.701019	0.000826637	0.17014	0.0511266	0.212698	0.000422378	-0.701019	0.000826637	-0.329444	0.168408
miR-32	up	FAT3	down	-0.700851	0.00083006	0.132337	0.130373	0.00164852	0.97845	-0.700851	0.00083006	0.217367	0.371368
miR-28	down	C15orf48	up	-0.700459	0.000838086	0.00889947	0.919331	0.068482	0.261241	-0.700459	0.000838086	-0.0463727	0.850476
miR-708	up	FGF2	down	-0.699766	0.00085246	0.0250018	0.77598	0.021851	0.720273	-0.699766	0.00085246	0.022409	0.927446
miR-335	up	RECK	down	-0.699306	0.000862116	-0.322667	0.000161078	-0.161618	0.00767998	-0.699306	0.000862116	0.063887	0.79499
miR-205	up	PDLIM5	down	-0.69924	0.000863501	0.131628	0.132464	0.0118217	0.846398	-0.69924	0.000863501	0.284835	0.237222
miR-135b	up	THRA	down	-0.699169	0.000865004	-0.0841486	0.337407	0.0311829	0.60929	-0.699169	0.000865004	0.488704	0.0337365
miR-17	up	PRKACB	down	-0.69916	0.000865182	-0.0771528	0.379239	-0.216034	0.000340559	-0.69916	0.000865182	-0.141607	0.563081
miR-378a	down	HCAR1	up	-0.696832	0.000915594	0.183451	0.0352436	0.211113	0.000467354	-0.696832	0.000915594	0.296229	0.218158
miR-455	up	NT5DC3	down	-0.696614	0.000920437	-0.0536344	0.541338	-0.0387682	0.525106	-0.696614	0.000920437	-0.293561	0.222528
miR-224	up	DPYSL2	down	-0.69655	0.000921866	-0.214672	0.0134425	-0.178991	0.00310796	-0.69655	0.000921866	-0.0569688	0.816809
miR-642a	up	ATP2B4	down	-0.696184	0.000930045	0.103057	0.239633	0.108048	0.0757876	-0.696184	0.000930045	0.205925	0.397671
miR-142	up	MCAM	down	-0.695631	0.000942529	0.121492	0.165225	0.168065	0.00554292	-0.695631	0.000942529	0.1398	0.568122
let-7c	down	ITGA3	up	-0.695276	0.000950639	-0.128666	0.141476	-0.160198	0.00823966	-0.695276	0.000950639	-0.481875	0.0366909
miR-224	up	CREBRF	down	-0.694646	0.000965139	-0.0493525	0.574139	-0.0789344	0.195168	-0.694646	0.000965139	0.244071	0.313939
miR-203a	up	PRKCA	down	-0.694585	0.000966559	-0.0100333	0.909094	-0.0698022	0.252136	-0.694585	0.000966559	0.123193	0.615351
miR-584	up	CAV1	down	-0.693808	0.000984708	-0.0359399	0.682449	0.00725113	0.905419	-0.693808	0.000984708	0.309128	0.197816
miR-17	up	SEC23A	down	-0.693197	0.000999188	-0.071497	0.415262	-0.127903	0.0353381	-0.693197	0.000999188	0.134532	0.582931
miR-200c	up	EDNRA	down	-0.692833	0.0010079	-0.377684	8.02615e-06	-0.400618	7.19558e-12	-0.692833	0.0010079	0.0751929	0.75965
miR-139	down	LRRC45	up	-0.692009	0.00102787	-0.0901775	0.303807	-0.116148	0.0561751	-0.692009	0.00102787	-0.275641	0.25336
miR-135b	up	DNAJB4	down	-0.691681	0.00103591	0.0239683	0.785011	0.059055	0.332784	-0.691681	0.00103591	-0.200458	0.410589
miR-425	up	PLSCR4	down	-0.691308	0.00104512	-0.250397	0.00378242	-0.358674	1.19626e-09	-0.691308	0.00104512	-0.415482	0.0768813
miR-32	up	MOAP1	down	-0.690262	0.00107128	0.0965734	0.27065	-0.0659656	0.279213	-0.690262	0.00107128	-0.0220308	0.928668
miR-32	up	MYADM	down	-0.689769	0.00108381	-0.080034	0.361643	-0.127555	0.0358441	-0.689769	0.00108381	0.491708	0.0324966
miR-203a	up	MXRA7	down	-0.689321	0.0010953	0.0902907	0.303198	-0.191327	0.00155426	-0.689321	0.0010953	-0.475077	0.0398268
miR-32	up	CCSER2	down	-0.689221	0.00109788	-0.197093	0.0235034	-0.2155	0.000352575	-0.689221	0.00109788	-0.0116104	0.962375
miR-142	up	MEF2D	down	-0.689171	0.00109919	0.241483	0.0052799	0.276472	3.82556e-06	-0.689171	0.00109919	0.372842	0.115914
miR-142	up	IL6ST	down	-0.688272	0.00112261	0.399039	2.14357e-06	0.311427	1.66083e-07	-0.688272	0.00112261	0.204892	0.400095
miR-32	up	FGF2	down	-0.688005	0.00112966	0.00327761	0.970247	-0.102728	0.0914564	-0.688005	0.00112966	0.172766	0.479387
miR-4724	up	GNG12	down	-0.687718	0.00113726	-0.25642	0.00299937	-0.317283	9.42131e-08	-0.687718	0.00113726	-0.506001	0.0270757
miR-455	up	MAPRE2	down	-0.68636	0.00117384	0.00679442	0.938369	-0.149833	0.0135445	-0.68636	0.00117384	-0.516015	0.0237202
miR-135b	up	LATS2	down	-0.686052	0.00118228	-0.134036	0.125466	0.0603027	0.322654	-0.686052	0.00118228	0.0622594	0.800111
miR-642a	up	SCUBE3	down	-0.685381	0.00120083	-0.150823	0.0843057	-0.176386	0.00357823	-0.685381	0.00120083	0.34712	0.145374
miR-708	up	THRA	down	-0.685157	0.00120707	-0.0172525	0.84434	0.100501	0.0987421	-0.685157	0.00120707	-0.364723	0.124708
miR-455	up	FKBP5	down	-0.684817	0.0012166	0.105107	0.230361	0.113926	0.0610827	-0.684817	0.0012166	-0.425352	0.0694396
miR-139	down	SLC5A6	up	-0.684673	0.00122068	-0.0470765	0.591944	-0.05401	0.375804	-0.684673	0.00122068	-0.0921962	0.707369
miR-425	up	PPARGC1A	down	-0.684283	0.00123171	-0.141159	0.106427	-0.224399	0.000195618	-0.684283	0.00123171	-0.0664331	0.786995
miR-200b	up	WASF3	down	-0.683523	0.00125346	0.0551629	0.529857	-0.00759588	0.900945	-0.683523	0.00125346	-0.221938	0.361142
miR-142	up	RAB30	down	-0.682656	0.00127869	0.363166	1.87033e-05	0.209076	0.000531667	-0.682656	0.00127869	-0.241846	0.31851
miR-183	up	KCTD12	down	-0.682456	0.00128454	-0.445669	8.55482e-08	-0.390174	2.75366e-11	-0.682456	0.00128454	-0.423252	0.0709761
miR-200c	up	FKBP5	down	-0.682397	0.00128629	-0.548407	9.97169e-12	-0.472348	1.82033e-16	-0.682397	0.00128629	-0.0770504	0.753885
miR-100	down	MMP13	up	-0.681709	0.00130671	0.0857277	0.328387	0.0913458	0.133633	-0.681709	0.00130671	0.188114	0.440571
miR-6507	down	WDR66	up	-0.681555	0.00131132	0.246527	0.00437803	-0.154673	0.0107777	-0.681555	0.00131132	0.201679	0.407684
miR-17	up	FAM129A	down	-0.681246	0.00132057	-0.269742	0.00176115	-0.344662	5.6383e-09	-0.681246	0.00132057	-0.140939	0.56494
miR-455	up	FNBP1	down	-0.681056	0.00132632	-0.0661369	0.451178	-0.233331	0.00010575	-0.681056	0.00132632	-0.198677	0.414847
miR-142	up	KCTD12	down	-0.68097	0.00132894	0.444236	9.51439e-08	0.362078	8.11411e-10	-0.68097	0.00132894	0.214506	0.37785
miR-584	up	SOBP	down	-0.679559	0.00137222	-0.271001	0.00167237	-0.174768	0.0039019	-0.679559	0.00137222	-0.0174501	0.943474
miR-17	up	FYCO1	down	-0.677776	0.00142865	-0.360733	2.14667e-05	-0.373121	2.2309e-10	-0.677776	0.00142865	-0.542778	0.0163373
miR-335	up	ANKRD53	down	-0.677281	0.00144463	-0.126836	0.147273	0.0449046	0.461623	-0.677281	0.00144463	0.167924	0.491973
miR-335	up	SMOC2	down	-0.676592	0.00146715	-0.162082	0.0633444	-0.035058	0.565537	-0.676592	0.00146715	-0.297569	0.215983
miR-142	up	RGS5	down	-0.676313	0.00147636	-0.248862	0.00400932	-0.189837	0.00169375	-0.676313	0.00147636	-0.0967231	0.693648
miR-6892	down	PLEKHG4B	up	-0.676212	0.0014797	-0.144283	0.0988265	-0.118489	0.0513645	-0.676212	0.0014797	-0.123343	0.614916
miR-27b	down	SLC5A6	up	-0.675752	0.001495	-0.215651	0.0130148	-0.0833038	0.171502	-0.675752	0.001495	-0.229363	0.344876
miR-205	up	KLHL15	down	-0.673956	0.00155602	-0.263651	0.00225406	-0.238007	7.58996e-05	-0.673956	0.00155602	-0.32593	0.173268
miR-224	up	JMY	down	-0.673359	0.00157677	-0.0668142	0.446546	0.027949	0.646908	-0.673359	0.00157677	0.379795	0.108743
miR-335	up	IL33	down	-0.672284	0.00161469	-0.220715	0.0109859	-0.103282	0.0897118	-0.672284	0.00161469	-0.308877	0.1982
miR-203a	up	CELF2	down	-0.671981	0.00162554	-0.25375	0.00332641	-0.258921	1.58516e-05	-0.671981	0.00162554	0.0510412	0.835609
miR-142	up	ENTPD1	down	-0.671876	0.00162929	0.388645	4.12293e-06	0.265364	9.5162e-06	-0.671876	0.00162929	0.126349	0.606255
miR-183	up	ZFHX4	down	-0.671787	0.00163249	-0.358264	2.46616e-05	-0.294735	7.82456e-07	-0.671787	0.00163249	-0.31144	0.194308
miR-23b	down	CDT1	up	-0.671486	0.00164335	-0.319109	0.000191933	-0.289056	1.29715e-06	-0.671486	0.00164335	-0.560122	0.0126253
miR-182	up	TCEAL7	down	-0.671081	0.00165803	-0.215022	0.0132882	-0.159645	0.00846736	-0.671081	0.00165803	0.0248859	0.919451
miR-183	up	LAMA2	down	-0.67036	0.00168449	-0.250062	0.00383089	-0.210332	0.00049109	-0.67036	0.00168449	0.00211727	0.993136
miR-203b	up	KCNN3	down	-0.670219	0.00168971	-0.0642771	0.464034	-0.226513	0.000169482	-0.670219	0.00168971	-0.26471	0.273432
miR-96	up	RECK	down	-0.670199	0.00169045	-0.452531	5.10539e-08	-0.34784	3.99318e-09	-0.670199	0.00169045	-0.0373891	0.879216
miR-203a	up	SMAD9	down	-0.669766	0.00170653	-0.0207711	0.813124	-0.0233961	0.701408	-0.669766	0.00170653	-0.188766	0.438961
miR-17	up	JPH2	down	-0.669653	0.00171073	-0.244353	0.00474829	-0.28091	2.62812e-06	-0.669653	0.00171073	-0.190554	0.434556
miR-642a	up	RGS5	down	-0.669484	0.00171707	-0.0942792	0.282249	-0.315067	1.16928e-07	-0.669484	0.00171707	-0.331542	0.165552
miR-944	up	GATA6	down	-0.667925	0.00177638	-0.232667	0.00726035	-0.395348	1.42461e-11	-0.667925	0.00177638	-0.454027	0.0508573
miR-345	up	SAMD4A	down	-0.667795	0.0017814	-0.300512	0.0004634	-0.419625	5.53063e-13	-0.667795	0.0017814	-0.0837895	0.733077
miR-142	up	ZBTB20	down	-0.667762	0.00178269	0.0202385	0.817832	-0.144578	0.0172382	-0.667762	0.00178269	-0.129351	0.597653
miR-200c	up	TPD52L1	down	-0.666742	0.00182251	-0.213074	0.0141677	-0.019526	0.748981	-0.666742	0.00182251	-0.0794766	0.746375
miR-203a	up	PTBP2	down	-0.666306	0.00183975	-0.157403	0.0714699	-0.136159	0.0249902	-0.666306	0.00183975	-0.170422	0.485459
miR-139	down	KSR2	up	-0.66559	0.0018684	-0.0145184	0.868766	-0.0702874	0.248847	-0.66559	0.0018684	-0.0608349	0.804599
let-7c	down	ARID3A	up	-0.664875	0.00189734	-0.0193447	0.825746	-0.033583	0.582014	-0.664875	0.00189734	-0.320308	0.181239
miR-23b	down	PRAP1	up	-0.66485	0.00189837	-0.146695	0.0932584	0.0119544	0.844695	-0.66485	0.00189837	-0.263249	0.276187
miR-378a	down	DDX39A	up	-0.664678	0.00190541	-0.0216857	0.805056	0.0563545	0.355404	-0.664678	0.00190541	-0.0751403	0.759814
miR-142	up	FZD7	down	-0.664421	0.00191592	0.00134142	0.987821	-0.0198958	0.744391	-0.664421	0.00191592	0.267994	0.2673
miR-203a	up	PRICKLE2	down	-0.664242	0.00192331	-0.0364456	0.678227	-0.0570308	0.34965	-0.664242	0.00192331	0.375468	0.113168
miR-23b	down	TIMELESS	up	-0.664182	0.00192577	-0.348943	4.12129e-05	-0.223848	0.000203029	-0.664182	0.00192577	-0.219538	0.366492
miR-149	up	GLP2R	down	-0.662623	0.001991	-0.187889	0.0309743	-0.140321	0.0208475	-0.662623	0.001991	-0.0371672	0.879927
miR-142	up	PCDHGA2	down	-0.662583	0.00199268	0.0538395	0.53979	0.127449	0.0359998	-0.662583	0.00199268	-0.0310456	0.899599
miR-31	up	GYG1	down	-0.662526	0.00199511	-0.083481	0.341267	-0.129451	0.0331596	-0.662526	0.00199511	-0.185314	0.447529
miR-944	up	NR3C2	down	-0.662389	0.00200094	-0.271513	0.00163745	-0.360979	9.2019e-10	-0.662389	0.00200094	-0.459791	0.0476302
miR-6854	up	LAMA4	down	-0.662359	0.00200224	0.0385846	0.66048	-0.162196	0.00746231	-0.662359	0.00200224	0.282634	0.241024
miR-490	down	RAB11FIP4	up	-0.661539	0.00203742	-0.120471	0.168834	-0.0378903	0.534538	-0.661539	0.00203742	-0.00588915	0.98091
miR-203b	up	CNKSR2	down	-0.661532	0.00203774	-0.173753	0.0463201	-0.00548565	0.928376	-0.661532	0.00203774	0.217881	0.37021
miR-149	up	PKNOX2	down	-0.661207	0.00205181	0.0314907	0.720008	-0.026518	0.663853	-0.661207	0.00205181	0.40887	0.0821854
miR-340	down	ZBTB8B	up	-0.660482	0.00208356	-0.242888	0.00501334	-0.126367	0.0376184	-0.660482	0.00208356	-0.15668	0.521808
miR-200a	up	SRF	down	-0.659523	0.00212617	-0.392677	3.20742e-06	-0.479197	5.781e-17	-0.659523	0.00212617	0.0227577	0.92632
miR-4724	up	AKAP2	down	-0.659513	0.00212664	-0.218625	0.0117869	-0.144893	0.0169948	-0.659513	0.00212664	0.122591	0.61709
miR-4724	up	TBX4	down	-0.659142	0.00214331	-0.17871	0.0403421	-0.189969	0.00168089	-0.659142	0.00214331	-0.30488	0.20437
miR-27b	down	OLR1	up	-0.659108	0.00214486	0.0458908	0.601318	0.0557644	0.360472	-0.659108	0.00214486	0.0612948	0.80315
miR-517b	up	NACC2	down	-0.658983	0.00215051	-0.0211431	0.80984	-0.107286	0.0778869	-0.658983	0.00215051	-0.0451805	0.85428
miR-517a	up	NACC2	down	-0.658983	0.00215051	-0.0194722	0.824616	-0.108819	0.0737083	-0.658983	0.00215051	-0.0495211	0.840444
miR-17	up	KCNB1	down	-0.658121	0.00218975	-0.283449	0.000989767	-0.30589	2.80746e-07	-0.658121	0.00218975	0.104333	0.670788
miR-642a	up	AKAP2	down	-0.657723	0.00220812	-0.0555047	0.527307	-0.0900508	0.139254	-0.657723	0.00220812	0.0631172	0.797411
miR-17	up	CCSER2	down	-0.657222	0.00223135	-0.258771	0.0027357	-0.338868	1.04725e-08	-0.657222	0.00223135	-0.362008	0.127751
miR-32	up	MEF2D	down	-0.656749	0.0022535	-0.0272913	0.756083	-0.18115	0.0027613	-0.656749	0.0022535	0.240717	0.320844
miR-142	up	DNAJB4	down	-0.656144	0.0022821	0.34047	6.48266e-05	0.195277	0.00123373	-0.656144	0.0022821	0.110576	0.652239
miR-17	up	ARHGAP1	down	-0.655229	0.00232593	-0.233038	0.00716529	-0.341823	7.64905e-09	-0.655229	0.00232593	0.0435777	0.859399
miR-17	up	MBNL1	down	-0.655223	0.00232623	-0.0823442	0.347905	-0.260819	1.36581e-05	-0.655223	0.00232623	-0.327762	0.170722
miR-192	up	LRRFIP1	down	-0.655129	0.00233075	-0.0433957	0.621257	-0.106549	0.0799638	-0.655129	0.00233075	-0.0334264	0.891941
miR-27b	down	LRRC61	up	-0.655007	0.00233666	-0.30249	0.000423081	-0.231302	0.000121862	-0.655007	0.00233666	-0.112212	0.647409
miR-6892	down	ZNF488	up	-0.655003	0.00233688	0.0789098	0.368447	-0.0554348	0.363322	-0.655003	0.00233688	-0.025562	0.917269
miR-32	up	GPC6	down	-0.65482	0.00234577	-0.145351	0.0963284	-0.133389	0.0281261	-0.65482	0.00234577	0.131318	0.592048
miR-204	down	MDFI	up	-0.654754	0.00234897	-0.374623	9.6259e-06	-0.0145028	0.812149	-0.654754	0.00234897	-0.442435	0.0578479
miR-143	down	OAS3	up	-0.654424	0.00236508	0.16846	0.0534986	0.061829	0.310535	-0.654424	0.00236508	0.228018	0.347792
miR-32	up	IL6ST	down	-0.65435	0.00236871	-0.089989	0.304824	-0.146036	0.0161344	-0.65435	0.00236871	0.194231	0.425574
miR-642a	up	MPP2	down	-0.653978	0.00238699	-0.100594	0.251109	-0.184195	0.00233221	-0.653978	0.00238699	0.175988	0.471099
miR-642a	up	FOXN3	down	-0.653771	0.00239722	-0.0964977	0.271027	-0.237722	7.74679e-05	-0.653771	0.00239722	-0.15311	0.531452
miR-145	down	LMNB2	up	-0.653554	0.00240796	0.108729	0.214607	-0.178315	0.00322415	-0.653554	0.00240796	-0.394185	0.0949239
miR-143	down	CASP5	up	-0.653533	0.002409	0.300177	0.000470578	0.0308015	0.613677	-0.653533	0.002409	-0.00512546	0.983386
miR-6499	up	STX2	down	-0.653467	0.0024123	-0.0523296	0.551235	-0.207199	0.000598094	-0.653467	0.0024123	-0.231571	0.340124
miR-32	up	RORA	down	-0.653151	0.00242807	0.0525059	0.549892	0.139211	0.0218896	-0.653151	0.00242807	-0.109662	0.654943
miR-17	up	RAB23	down	-0.652642	0.00245362	-0.238645	0.00585702	-0.237701	7.75815e-05	-0.652642	0.00245362	-0.435649	0.0622628
miR-203a	up	ROCK2	down	-0.65251	0.00246028	-0.107852	0.218346	0.0255337	0.675609	-0.65251	0.00246028	0.591802	0.0076029
miR-192	up	RNASE4	down	-0.652457	0.002463	0.10519	0.229993	-0.0541046	0.374967	-0.652457	0.002463	-0.204883	0.400116
miR-17	up	RAB30	down	-0.651604	0.00250646	-0.12474	0.154131	-0.255974	1.9931e-05	-0.651604	0.00250646	-0.162387	0.50656
miR-187	up	LDLR	down	-0.650498	0.00256382	-0.0730119	0.405422	-0.162519	0.00734289	-0.650498	0.00256382	-0.355955	0.134723
miR-203a	up	TCF4	down	-0.649549	0.0026139	-0.186736	0.0320392	-0.177434	0.00338173	-0.649549	0.0026139	-0.094856	0.699296
miR-143	down	GALNT6	up	-0.648823	0.00265271	0.242998	0.00499285	0.00608654	0.920555	-0.648823	0.00265271	-0.276549	0.251736
miR-210	up	SERTM1	down	-0.648793	0.00265436	-0.163166	0.0615742	-0.377321	1.34761e-10	-0.648793	0.00265436	-0.410537	0.0808239
miR-642a	up	PTGIS	down	-0.648125	0.00269054	-0.110289	0.20806	-0.141949	0.0193967	-0.648125	0.00269054	-0.525668	0.0208038
miR-378a	down	HIC2	up	-0.647864	0.00270479	0.242342	0.00511545	0.224358	0.000196166	-0.647864	0.00270479	0.419149	0.0740503
miR-378a	down	ERVMER34-1	up	-0.647405	0.00272999	0.0164407	0.851578	-0.024353	0.689815	-0.647405	0.00272999	-0.141047	0.564641
miR-335	up	PELI2	down	-0.646882	0.00275894	-0.00472638	0.957106	-0.153689	0.0112958	-0.646882	0.00275894	-0.313171	0.191709
miR-182	up	RECK	down	-0.646799	0.00276352	-0.447699	7.35184e-08	-0.275379	4.19195e-06	-0.646799	0.00276352	0.0672051	0.784575
miR-28	down	HIC2	up	-0.645705	0.00282505	-0.00242744	0.977962	-0.199357	0.000967353	-0.645705	0.00282505	-0.0916964	0.708889
miR-335	up	ADAMTS8	down	-0.645653	0.00282797	-0.057164	0.515014	-0.060952	0.317462	-0.645653	0.00282797	-0.23206	0.339075
miR-138-1	up	FREM1	down	-0.645469	0.00283843	-0.0215832	0.805959	-0.192681	0.00143666	-0.645469	0.00283843	-0.063471	0.796298
miR-21	up	SPRY2	down	-0.645467	0.00283853	0.0435912	0.619684	0.0591724	0.331823	-0.645467	0.00283853	-0.397054	0.0923287
miR-135b	up	CNKSR3	down	-0.645446	0.00283972	0.0422848	0.630225	0.0917332	0.131986	-0.645446	0.00283972	-0.0474501	0.84704
miR-4786	down	FANCA	up	-0.645364	0.00284443	-0.00715137	0.935138	0.0341176	0.576016	-0.645364	0.00284443	0.0507973	0.836384
miR-195	down	TFAP2A	up	-0.644667	0.00288439	-0.00208563	0.981065	-0.1847	0.00226722	-0.644667	0.00288439	-0.349828	0.142048
miR-584	up	KCTD10	down	-0.644621	0.00288703	-0.0926268	0.290807	-0.193164	0.00139674	-0.644621	0.00288703	0.548719	0.0149789
miR-143	down	GLRA3	up	-0.644581	0.00288938	-0.145125	0.0968527	-0.0169102	0.781696	-0.644581	0.00288938	0.0554493	0.82162
miR-378a	down	ZBTB8B	up	-0.644293	0.00290607	-0.00143544	0.986967	0.196546	0.0011444	-0.644293	0.00290607	-0.269019	0.265405
miR-642a	up	ANTXR2	down	-0.643599	0.00294655	0.0435165	0.620285	-0.0799469	0.189483	-0.643599	0.00294655	-0.268382	0.266583
miR-365a	down	TONSL	up	-0.642835	0.0029917	-0.103327	0.238396	-0.0498586	0.413648	-0.642835	0.0029917	-0.224298	0.355926
miR-17	up	CFL2	down	-0.641913	0.00304698	-0.104688	0.232235	-0.197089	0.00110808	-0.641913	0.00304698	0.284625	0.237582
miR-195	down	BID	up	-0.641535	0.00306984	-0.1157	0.18647	-0.124614	0.040372	-0.641535	0.00306984	0.149127	0.542311
miR-378a	down	GALNT6	up	-0.641413	0.00307727	-0.106942	0.222278	-0.217299	0.000313575	-0.641413	0.00307727	0.23259	0.337944
miR-23b	down	E2F2	up	-0.640865	0.00311078	-0.187383	0.0314383	-0.17137	0.00466912	-0.640865	0.00311078	-0.336542	0.158877
miR-200c	up	KLF9	down	-0.640519	0.00313209	-0.371778	1.13789e-05	-0.392379	2.08231e-11	-0.640519	0.00313209	-0.167698	0.492564
miR-17	up	PTGIS	down	-0.64041	0.0031388	-0.261206	0.00248482	-0.400303	7.49752e-12	-0.64041	0.0031388	-0.318719	0.183535
miR-365b	down	TONSL	up	-0.640169	0.00315377	-0.10606	0.226139	-0.051899	0.394775	-0.640169	0.00315377	-0.221219	0.362741
miR-192	up	FGF7	down	-0.640063	0.00316034	-0.36967	1.28676e-05	-0.333138	1.90799e-08	-0.640063	0.00316034	-0.194006	0.426121
miR-32	up	TPPP	down	-0.639678	0.00318437	-0.0901712	0.303841	-0.103669	0.0885084	-0.639678	0.00318437	0.173347	0.477886
miR-335	up	CEP85L	down	-0.639328	0.00320637	-0.138725	0.112659	-0.12399	0.0413932	-0.639328	0.00320637	0.128452	0.600225
miR-642a	up	OTUD7A	down	-0.638896	0.00323361	-0.0611326	0.486221	-0.221718	0.000234184	-0.638896	0.00323361	0.0599804	0.807294
miR-224	up	FAT3	down	-0.638607	0.00325201	-0.103119	0.239346	-0.141861	0.0194729	-0.638607	0.00325201	-0.0933407	0.703891
miR-335	up	CSGALNACT1	down	-0.637976	0.00329245	-0.183428	0.0352673	-0.13359	0.0278876	-0.637976	0.00329245	-0.0164231	0.946796
miR-642a	up	CELF2	down	-0.637405	0.00332937	0.0987311	0.260039	-0.0883349	0.146978	-0.637405	0.00332937	-0.432422	0.0644492
miR-455	up	SNX9	down	-0.637086	0.00335013	0.0519952	0.553785	-0.0646282	0.289096	-0.637086	0.00335013	0.025855	0.916324
miR-203b	up	PDLIM3	down	-0.636833	0.00336668	-0.0920004	0.294096	-0.0942552	0.121643	-0.636833	0.00336668	0.112465	0.646664
miR-17	up	KCNMB1	down	-0.636829	0.00336694	-0.351436	3.59806e-05	-0.382511	7.15624e-11	-0.636829	0.00336694	-0.110836	0.651471
miR-142	up	TPSG1	down	-0.636088	0.00341579	0.0965082	0.270975	-0.0141495	0.816643	-0.636088	0.00341579	-0.145831	0.551371
miR-17	up	CLIC4	down	-0.635644	0.00344536	-0.0337222	0.70108	-0.137192	0.0239005	-0.635644	0.00344536	-0.0595959	0.808508
miR-203a	up	ZEB1	down	-0.635104	0.00348161	-0.272741	0.0015564	-0.266396	8.75798e-06	-0.635104	0.00348161	0.27207	0.259812
miR-32	up	PPARGC1A	down	-0.634979	0.00349002	-0.145427	0.0961526	-0.231181	0.000122895	-0.634979	0.00349002	-0.108349	0.658835
miR-224	up	SYNM	down	-0.634833	0.0034999	-0.108457	0.21576	-0.107715	0.0766996	-0.634833	0.0034999	0.376829	0.111762
miR-100	down	KPNA2	up	-0.634826	0.0035004	0.121463	0.165326	-0.173104	0.0042621	-0.634826	0.0035004	-0.473061	0.0407955
miR-4724	up	PRICKLE2	down	-0.634823	0.0035006	-0.0927156	0.290343	-0.14043	0.0207475	-0.634823	0.0035006	0.430722	0.065624
miR-224	up	RAB9B	down	-0.634813	0.00350125	-0.259651	0.00264252	-0.157559	0.00937679	-0.634813	0.00350125	0.0846834	0.73033
miR-335	up	LDLRAD4	down	-0.634247	0.00353976	-0.166846	0.0558627	-0.0899738	0.139593	-0.634247	0.00353976	0.183698	0.451567
miR-138-1	up	MRVI1	down	-0.634208	0.00354242	0.0036236	0.967108	-0.0473763	0.43731	-0.634208	0.00354242	0.237897	0.326719
miR-335	up	NOVA1	down	-0.633779	0.00357186	0.0388959	0.657912	0.00425895	0.944363	-0.633779	0.00357186	0.00443967	0.985608
miR-335	up	SDC3	down	-0.633175	0.00361364	-0.275943	0.00136191	-0.179098	0.00308984	-0.633175	0.00361364	-0.308693	0.19848
miR-6499	up	JAM2	down	-0.633172	0.00361385	-0.188501	0.0304215	-0.369268	3.51978e-10	-0.633172	0.00361385	-0.592163	0.00755689
miR-183	up	GATA6	down	-0.633098	0.00361896	-0.307918	0.00032848	-0.397514	1.07747e-11	-0.633098	0.00361896	-0.218821	0.368097
miR-455	up	MXRA7	down	-0.63304	0.003623	0.124707	0.154241	-0.0144192	0.813211	-0.63304	0.003623	-0.151544	0.535711
miR-32	up	REV3L	down	-0.633014	0.00362485	0.0260735	0.766647	-0.0409302	0.502244	-0.633014	0.00362485	0.0477868	0.845967
miR-23b	down	CCNB2	up	-0.632938	0.00363009	-0.320648	0.00017797	-0.33329	1.87803e-08	-0.632938	0.00363009	-0.379407	0.109135
miR-335	up	RPS6KA2	down	-0.632212	0.0036811	-0.0072618	0.934138	-0.0721297	0.236628	-0.632212	0.0036811	-0.35379	0.13728
miR-23b	down	CDC20	up	-0.631826	0.00370842	-0.247334	0.00424736	-0.420356	4.99469e-13	-0.631826	0.00370842	-0.408258	0.0826897
miR-142	up	SIRT1	down	-0.631674	0.00371922	-0.089071	0.309803	-0.155531	0.0103427	-0.631674	0.00371922	-0.201728	0.407568
miR-4724	up	SEC23A	down	-0.631577	0.00372612	-0.216851	0.0125062	-0.244573	4.71059e-05	-0.631577	0.00372612	0.100063	0.683582
miR-335	up	FILIP1L	down	-0.631105	0.00375987	-0.200769	0.0209835	-0.0419239	0.491915	-0.631105	0.00375987	0.179302	0.462652
miR-1301	up	CPEB3	down	-0.630292	0.00381862	-0.176493	0.0429301	-0.0829362	0.173407	-0.630292	0.00381862	-0.424987	0.0697047
miR-149	up	ELMSAN1	down	-0.629955	0.0038432	0.019994	0.819995	-0.0705894	0.246814	-0.629955	0.0038432	0.0276788	0.910443
miR-642a	up	RUSC2	down	-0.629611	0.00386842	-0.0687248	0.433625	-0.21702	0.000319362	-0.629611	0.00386842	-0.143553	0.557671
miR-192	up	DNAJB4	down	-0.629029	0.0039114	-0.251053	0.00368902	-0.313082	1.41677e-07	-0.629029	0.0039114	-0.271951	0.260029
miR-195	down	WNT7A	up	-0.628987	0.00391448	0.0344125	0.695261	0.0308525	0.613089	-0.628987	0.00391448	-0.184197	0.45032
miR-145	down	MUC1	up	-0.628672	0.00393797	0.0100305	0.90912	0.11338	0.062342	-0.628672	0.00393797	0.396191	0.093104
miR-642a	up	MYOCD	down	-0.628387	0.00395924	-0.121197	0.166264	-0.20372	0.000741935	-0.628387	0.00395924	-0.362943	0.126697
miR-335	up	ZCWPW2	down	-0.627721	0.00400945	-0.115363	0.187764	-0.0210844	0.729698	-0.627721	0.00400945	0.0378972	0.877586
miR-27b	down	MMP13	up	-0.627603	0.00401836	0.272698	0.00155913	0.205827	0.000651417	-0.627603	0.00401836	0.387522	0.101154
miR-203a	up	CAV1	down	-0.627494	0.00402662	-0.0533444	0.543529	-0.135945	0.025222	-0.627494	0.00402662	0.205682	0.398241
miR-455	up	SCRG1	down	-0.626712	0.00408638	-0.221495	0.0106995	-0.437675	4.14631e-14	-0.626712	0.00408638	-0.486482	0.0346766
miR-32	up	GATA6	down	-0.626674	0.00408931	-0.0635077	0.46941	-0.179725	0.00298598	-0.626674	0.00408931	-0.0778275	0.751477
miR-4728	up	TMTC1	down	-0.625657	0.00416823	-0.261685	0.00243801	-0.0923393	0.12944	-0.625657	0.00416823	-0.0408441	0.868144
miR-203a	up	FOXN3	down	-0.625333	0.00419362	0.061408	0.484256	0.179247	0.00306486	-0.625333	0.00419362	0.114277	0.641332
miR-23b	down	POC1A	up	-0.625094	0.00421238	-0.352687	3.35961e-05	-0.327469	3.41299e-08	-0.625094	0.00421238	-0.458973	0.0480782
miR-335	up	DCHS2	down	-0.623705	0.0043231	-0.110647	0.20658	-0.110446	0.0694737	-0.623705	0.0043231	0.210965	0.385961
miR-143	down	C15orf48	up	-0.623626	0.00432946	0.206521	0.0175085	0.191003	0.00158364	-0.623626	0.00432946	0.216862	0.372507
miR-7156	down	DHCR7	up	-0.623548	0.00433576	0.0529468	0.546542	-0.101552	0.0952469	-0.623548	0.00433576	0.234038	0.334859
miR-6499	up	PTBP2	down	-0.623174	0.00436608	-0.19903	0.0221449	0.00059423	0.992231	-0.623174	0.00436608	0.0748661	0.760666
miR-6499	up	NT5DC3	down	-0.623148	0.00436818	-0.163312	0.061338	-0.181477	0.00271206	-0.623148	0.00436818	-0.135686	0.579673
miR-17	up	BNC2	down	-0.622852	0.00439227	-0.27917	0.00118855	-0.389357	3.05215e-11	-0.622852	0.00439227	-0.374198	0.11449
miR-204	down	RAB11FIP4	up	-0.622093	0.00445452	-0.0851326	0.331768	-0.0285733	0.639573	-0.622093	0.00445452	-0.0515567	0.83397
miR-335	up	PRICKLE2	down	-0.621955	0.00446597	-0.191692	0.0276734	-0.134084	0.0273086	-0.621955	0.00446597	0.279279	0.246893
miR-145	down	PSAT1	up	-0.621731	0.00448454	0.0996391	0.25566	-0.224263	0.000197423	-0.621731	0.00448454	-0.287391	0.232855
miR-195	down	HMGA1	up	-0.621729	0.00448471	-0.25488	0.00318428	-0.226998	0.000163965	-0.621729	0.00448471	-0.259142	0.284024
miR-335	up	SSPN	down	-0.621141	0.00453371	-0.0476508	0.587428	-0.082755	0.174351	-0.621141	0.00453371	0.198236	0.415902
miR-3074	up	DUSP3	down	-0.619273	0.0046924	0.0543875	0.535666	0.002207	0.971152	-0.619273	0.0046924	-0.243638	0.314825
miR-335	up	EVC	down	-0.618967	0.00471886	-0.221756	0.0106049	-0.105238	0.0837675	-0.618967	0.00471886	0.21879	0.368167
miR-6499	up	FNBP1	down	-0.618849	0.00472906	-0.440287	1.27231e-07	-0.339653	9.63716e-09	-0.618849	0.00472906	-0.147423	0.546988
miR-23b	down	FBN2	up	-0.618352	0.00477229	-0.0296555	0.735703	-0.00242697	0.968278	-0.618352	0.00477229	-0.192707	0.429285
miR-183	up	AKAP13	down	-0.618298	0.00477701	-0.24378	0.00485038	-0.315485	1.12277e-07	-0.618298	0.00477701	-0.10774	0.660644
miR-149	up	CRISPLD2	down	-0.618235	0.00478259	-0.226454	0.00902716	-0.0771783	0.205322	-0.618235	0.00478259	0.196279	0.420614
miR-335	up	KLHDC1	down	-0.617862	0.00481531	0.0249531	0.776405	0.0686918	0.259779	-0.617862	0.00481531	0.058064	0.813346
miR-519d	up	TGFBR2	down	-0.617705	0.0048291	0.0165351	0.850735	-0.138939	0.0221517	-0.617705	0.0048291	0.156568	0.522109
miR-149	up	ZCCHC24	down	-0.617463	0.00485054	-0.180124	0.0387601	-0.140974	0.0202542	-0.617463	0.00485054	-0.0360761	0.883429
miR-335	up	PDE7B	down	-0.615571	0.00502036	0.218612	0.0117918	0.0998271	0.101033	-0.615571	0.00502036	0.219855	0.365782
miR-17	up	RPS6KA5	down	-0.614563	0.00511284	0.098573	0.260806	0.040061	0.511372	-0.614563	0.00511284	-0.155947	0.52378
miR-642a	up	PGM2L1	down	-0.614562	0.00511299	-0.0763525	0.384218	-0.0588025	0.33486	-0.614562	0.00511299	0.196689	0.419624
miR-335	up	PCDHGA2	down	-0.613849	0.00517925	-0.167295	0.055196	-0.114429	0.059942	-0.613849	0.00517925	0.0379908	0.877286
miR-708	up	CTIF	down	-0.613784	0.00518533	0.018758	0.830951	0.140797	0.0204139	-0.613784	0.00518533	-0.201157	0.408925
miR-203b	up	CACNB2	down	-0.613448	0.00521683	0.053482	0.542489	-0.101219	0.0963439	-0.613448	0.00521683	0.00102731	0.99667
miR-335	up	ADAMTS16	down	-0.613126	0.00524709	-0.176623	0.0427747	-0.103355	0.0894841	-0.613126	0.00524709	-0.0516146	0.833786
miR-335	up	UNC5C	down	-0.612932	0.00526549	-0.0948288	0.279441	-0.0809603	0.183915	-0.612932	0.00526549	0.189888	0.436195
miR-204	down	HOXB7	up	-0.612785	0.00527936	-0.230794	0.00775741	-0.104643	0.085541	-0.612785	0.00527936	-0.231434	0.340418
miR-27b	down	RAB3B	up	-0.612453	0.00531098	-0.182831	0.0358773	-0.192873	0.00142068	-0.612453	0.00531098	-0.161781	0.508169
miR-335	up	DMGDH	down	-0.612379	0.00531806	-0.13882	0.112411	-0.0533782	0.381422	-0.612379	0.00531806	-0.36944	0.119543
miR-100	down	CKS1B	up	-0.612131	0.00534179	0.00300341	0.972735	-0.150105	0.0133741	-0.612131	0.00534179	-0.30019	0.21177
miR-671	up	CORO1C	down	-0.612121	0.00534266	-0.203727	0.0191291	-0.147882	0.0148261	-0.612121	0.00534266	-0.154178	0.528559
miR-203a	up	ZEB2	down	-0.611784	0.00537505	-0.313223	0.000255297	-0.286423	1.63375e-06	-0.611784	0.00537505	0.172999	0.478783
miR-192	up	USP12	down	-0.610839	0.00546671	0.0826332	0.34621	0.0219237	0.719383	-0.610839	0.00546671	0.295404	0.219503
miR-17	up	NFIB	down	-0.610296	0.00551992	-0.0156165	0.858939	-0.0527507	0.387053	-0.610296	0.00551992	-0.409771	0.0814472
miR-642a	up	KIAA0408	down	-0.609021	0.00564662	-0.0865814	0.323575	-0.130988	0.0311094	-0.609021	0.00564662	-0.126389	0.606139
miR-149	up	NPTX1	down	-0.608974	0.00565136	0.0910414	0.299179	0.0971172	0.110682	-0.608974	0.00565136	0.271274	0.261264
miR-6499	up	WDR17	down	-0.608927	0.00565605	-0.084581	0.334922	0.026167	0.668035	-0.608927	0.00565605	-0.213344	0.380502
miR-642a	up	TMX4	down	-0.608882	0.00566055	0.0752817	0.390941	-0.137759	0.0233208	-0.608882	0.00566055	-0.401763	0.0881825
miR-378a	down	RCC2	up	-0.608466	0.00570247	-0.0238049	0.786441	0.0894598	0.141878	-0.608466	0.00570247	0.199251	0.41347
miR-335	up	MPDZ	down	-0.608363	0.00571296	0.077356	0.377981	0.00154136	0.97985	-0.608363	0.00571296	0.472065	0.0412807
miR-149	up	MLXIP	down	-0.60836	0.00571316	-0.0223889	0.798867	-0.198492	0.00101898	-0.60836	0.00571316	-0.0278154	0.910003
miR-17	up	CAV1	down	-0.608195	0.00572994	0.0187776	0.830777	-0.143486	0.0181076	-0.608195	0.00572994	-0.09527	0.698043
miR-183	up	STARD13	down	-0.608191	0.00573029	-0.445421	8.71358e-08	-0.419577	5.56809e-13	-0.608191	0.00573029	-0.0335209	0.891638
miR-4786	down	PLEKHG4B	up	-0.60807	0.0057426	0.0561482	0.522522	0.111783	0.0661445	-0.60807	0.0057426	0.0875896	0.721421
miR-100	down	WDR4	up	-0.60798	0.00575179	-0.0261229	0.766218	-0.112268	0.06497	-0.60798	0.00575179	-0.131552	0.591382
miR-183	up	ITGA5	down	-0.607028	0.00584932	-0.45837	3.26126e-08	-0.506106	4.93392e-19	-0.607028	0.00584932	-0.196571	0.419909
miR-17	up	ADARB1	down	-0.606307	0.00592414	0.0192358	0.826711	-0.156711	0.00977052	-0.606307	0.00592414	-0.274871	0.254742
miR-32	up	PPP1R12C	down	-0.606067	0.00594923	0.1794	0.0395642	-0.00147133	0.980766	-0.606067	0.00594923	0.0804919	0.743238
miR-944	up	NPR1	down	-0.605842	0.00597278	-0.340988	6.30806e-05	-0.423047	3.42421e-13	-0.605842	0.00597278	-0.299592	0.212727
miR-203a	up	HTR2A	down	-0.60552	0.0060067	-0.109789	0.210144	-0.200435	0.000906425	-0.60552	0.0060067	0.0494067	0.840808
miR-335	up	CABP1	down	-0.605393	0.00602009	0.275094	0.00141117	0.223329	0.000210242	-0.605393	0.00602009	0.360874	0.129037
miR-335	up	PLIN4	down	-0.605283	0.00603168	0.188338	0.0305684	0.195782	0.00119748	-0.605283	0.00603168	0.193668	0.426943
miR-374b	down	TMEM44	up	-0.605135	0.00604742	-0.130805	0.134921	-0.0909666	0.13526	-0.605135	0.00604742	0.162676	0.505794
miR-200a	up	CLIP1	down	-0.604393	0.00612648	-0.0684332	0.435583	-0.0157878	0.795855	-0.604393	0.00612648	0.429019	0.0668169
miR-32	up	GULP1	down	-0.604213	0.00614587	-0.0116396	0.89462	-0.137288	0.0238022	-0.604213	0.00614587	-0.19564	0.422157
miR-455	up	PTBP2	down	-0.604172	0.00615024	-0.231509	0.00756436	-0.175065	0.00384057	-0.604172	0.00615024	-0.121105	0.621397
miR-365a	down	ZNF675	up	-0.603978	0.00617108	-0.166971	0.0556766	0.0140704	0.81765	-0.603978	0.00617108	0.0846343	0.730481
miR-365b	down	ZNF675	up	-0.603508	0.0062219	-0.169886	0.0514803	0.0157359	0.796512	-0.603508	0.0062219	0.0880192	0.720106
miR-195	down	PSAT1	up	-0.603436	0.00622974	0.0410345	0.640383	-0.183334	0.00244686	-0.603436	0.00622974	-0.240122	0.322078
miR-149	up	ITGB3	down	-0.602948	0.00628291	-0.0534388	0.542816	-0.259306	1.53818e-05	-0.602948	0.00628291	-0.10465	0.669842
miR-203a	up	MBNL1	down	-0.602873	0.00629115	-0.11066	0.206526	0.0450059	0.460611	-0.602873	0.00629115	0.252503	0.296979
miR-17	up	ZBTB4	down	-0.602494	0.00633281	-0.157451	0.0713834	-0.235272	9.2224e-05	-0.602494	0.00633281	-0.548845	0.0149512
miR-143	down	IYD	up	-0.602323	0.00635161	-0.0846178	0.33471	-0.0351416	0.56461	-0.602323	0.00635161	0.250635	0.300687
miR-17	up	CLIP4	down	-0.601814	0.00640799	-0.229122	0.0082265	-0.17388	0.0040905	-0.601814	0.00640799	-0.282361	0.241497
miR-31	up	DACT3	down	-0.601587	0.00643335	-0.178009	0.0411457	-0.177454	0.00337806	-0.601587	0.00643335	-0.316069	0.18741
miR-203a	up	ABL1	down	-0.601432	0.00645062	-0.132116	0.131021	-0.178719	0.00315424	-0.601432	0.00645062	-0.347711	0.144643
miR-6499	up	KATNAL1	down	-0.601257	0.00647024	0.0706883	0.420571	0.0595955	0.328371	-0.601257	0.00647024	0.178807	0.46391
miR-7156	down	ADAMTS20	up	-0.600467	0.00655928	0.0272091	0.756795	0.0955696	0.116509	-0.600467	0.00655928	0.366146	0.123133
miR-195	down	RAB3IP	up	-0.599803	0.00663484	0.0283379	0.747039	-0.0148078	0.808274	-0.599803	0.00663484	-0.223727	0.357183
miR-31	up	FLNA	down	-0.599763	0.00663934	0.124874	0.153685	0.0616955	0.311583	-0.599763	0.00663934	0.0272943	0.911683
miR-204	down	SIX1	up	-0.599684	0.0066484	-0.0259919	0.767357	-0.00468268	0.938838	-0.599684	0.0066484	0.190748	0.434081
miR-3074	up	GATA6	down	-0.599594	0.00665877	0.0800805	0.361363	-0.117569	0.0532125	-0.599594	0.00665877	-0.123411	0.614719
miR-100	down	RRM2	up	-0.598971	0.00673055	0.0736807	0.401123	-0.222427	0.000223354	-0.598971	0.00673055	-0.462117	0.0463733
miR-642a	up	GNAZ	down	-0.598906	0.0067381	-0.125292	0.152301	-0.313665	1.33933e-07	-0.598906	0.0067381	-0.230926	0.341508
miR-149	up	WWTR1	down	-0.597554	0.00689609	-0.16783	0.0544107	-0.222372	0.000224166	-0.597554	0.00689609	0.255212	0.29165
miR-335	up	PDE4D	down	-0.59696	0.00696658	-0.0211194	0.810049	-0.0901242	0.13893	-0.59696	0.00696658	-0.177397	0.4675
miR-203a	up	PRKACB	down	-0.596579	0.00701202	-0.0685713	0.434655	0.0342484	0.574553	-0.596579	0.00701202	0.440179	0.0592885
miR-335	up	MYOCD	down	-0.596115	0.00706769	-0.0956906	0.275074	-0.0717032	0.239418	-0.596115	0.00706769	-0.175676	0.4719
miR-455	up	RASSF2	down	-0.596104	0.00706905	-0.282295	0.00104013	-0.285209	1.81557e-06	-0.596104	0.00706905	-0.12195	0.618946
miR-17	up	PDLIM5	down	-0.59572	0.00711541	-0.153509	0.0788587	-0.226999	0.000163959	-0.59572	0.00711541	-0.573811	0.010202
miR-210	up	XKR4	down	-0.595521	0.0071395	-0.38494	5.17805e-06	-0.392601	2.02438e-11	-0.595521	0.0071395	-0.0411717	0.867095
miR-455	up	KATNAL1	down	-0.594834	0.00722333	0.227706	0.00864318	0.259414	1.52522e-05	-0.594834	0.00722333	0.18999	0.435943
miR-335	up	SCARA5	down	-0.594826	0.00722433	-0.0758678	0.387252	-0.050469	0.407947	-0.594826	0.00722433	-0.156837	0.521384
miR-335	up	ZEB2	down	-0.594767	0.00723154	-0.32028	0.000181222	-0.166737	0.00593335	-0.594767	0.00723154	0.292852	0.223699
miR-4724	up	TPD52L1	down	-0.594562	0.00725671	-0.249787	0.00387122	-0.352216	2.46733e-09	-0.594562	0.00725671	-0.694784	0.000961934
miR-17	up	PKD2	down	-0.594533	0.00726031	-0.157099	0.0720265	-0.312191	1.54352e-07	-0.594533	0.00726031	-0.359126	0.131037
miR-335	up	KCND3	down	-0.594125	0.00731072	-0.161827	0.0637669	-0.0923915	0.129223	-0.594125	0.00731072	-0.257519	0.287158
miR-335	up	PPFIA2	down	-0.593764	0.00735546	-0.00593333	0.946167	-0.0761232	0.211604	-0.593764	0.00735546	0.363938	0.125582
miR-4728	up	XKR4	down	-0.593402	0.00740057	-0.39639	2.53782e-06	-0.146474	0.0158153	-0.593402	0.00740057	-0.491594	0.0325429
miR-4724	up	ANTXR2	down	-0.593265	0.00741776	-0.194318	0.0255734	-0.247213	3.87383e-05	-0.593265	0.00741776	-0.0453773	0.853652
miR-23b	down	CHAF1B	up	-0.593186	0.00742771	-0.340259	6.55517e-05	-0.24863	3.48464e-05	-0.593186	0.00742771	-0.140708	0.565584
miR-17	up	BHMT2	down	-0.593068	0.00744251	-0.395005	2.77045e-06	-0.431996	9.52557e-14	-0.593068	0.00744251	-0.515448	0.0239009
miR-335	up	CCDC141	down	-0.592959	0.00745614	-0.197902	0.0229278	-0.10184	0.0943075	-0.592959	0.00745614	0.343024	0.150504
miR-455	up	STX2	down	-0.59285	0.00746984	0.180116	0.0387691	0.122814	0.0433758	-0.59285	0.00746984	0.13783	0.573642
miR-335	up	DIP2C	down	-0.592792	0.00747722	0.113353	0.195626	0.0229625	0.706684	-0.592792	0.00747722	0.527801	0.0201996
miR-135b	up	GATA6	down	-0.592616	0.00749939	-0.111399	0.203491	-0.102285	0.0928683	-0.592616	0.00749939	0.0664261	0.787017
miR-335	up	CD99L2	down	-0.592476	0.00751706	-0.283974	0.000967582	-0.206164	0.000637915	-0.592476	0.00751706	-0.233953	0.335038
miR-138-1	up	CCND2	down	-0.592424	0.00752364	-0.110294	0.208042	0.0197723	0.745923	-0.592424	0.00752364	-0.176141	0.47071
miR-33a	up	KLF9	down	-0.592304	0.00753894	-0.341162	6.25041e-05	-0.449625	6.84241e-15	-0.592304	0.00753894	-0.307943	0.19963
miR-335	up	FHL1	down	-0.592224	0.00754907	-0.264613	0.00216872	-0.130114	0.0322619	-0.592224	0.00754907	-0.181628	0.45677
miR-4786	down	ZNF468	up	-0.592123	0.00756193	0.0465166	0.596362	0.0546266	0.370371	-0.592123	0.00756193	0.0599916	0.807259
miR-17	up	PGM2L1	down	-0.591659	0.00762111	-0.23796	0.00600453	-0.123079	0.0429208	-0.591659	0.00762111	-0.254	0.294027
miR-142	up	KLHL15	down	-0.591566	0.00763308	0.226815	0.00891489	-0.0460921	0.449849	-0.591566	0.00763308	-0.301665	0.209424
miR-4724	up	PYGO1	down	-0.591558	0.00763404	-0.263045	0.00230939	-0.137913	0.0231655	-0.591558	0.00763404	-0.0134239	0.956502
miR-23b	down	HAPLN1	up	-0.590959	0.00771123	0.00803812	0.927116	-0.120295	0.0478908	-0.590959	0.00771123	-0.40816	0.0827709
miR-192	up	HSPA2	down	-0.590942	0.00771342	-0.0586861	0.503868	0.0274347	0.652978	-0.590942	0.00771342	0.400149	0.0895877
miR-708	up	CRISPLD2	down	-0.590838	0.00772691	-0.00113523	0.989693	0.175117	0.00382986	-0.590838	0.00772691	-0.170759	0.484582
miR-23b	down	CAMK2N2	up	-0.590794	0.00773255	-0.12108	0.166675	-0.147734	0.0149274	-0.590794	0.00773255	-0.603795	0.00619092
miR-23b	down	HIST3H2BB	up	-0.590706	0.00774392	-0.0774749	0.377247	-0.0672833	0.269699	-0.590706	0.00774392	-0.150054	0.539775
miR-4786	down	MYO10	up	-0.590577	0.00776068	0.0116212	0.894785	-0.0535048	0.380293	-0.590577	0.00776068	-0.143342	0.558256
miR-335	up	LONRF2	down	-0.59039	0.00778504	0.0299958	0.732784	0.0662993	0.276782	-0.59039	0.00778504	0.207773	0.393356
miR-374b	down	ACSBG1	up	-0.589993	0.0078369	-0.218821	0.0117097	0.0552254	0.36514	-0.589993	0.0078369	-0.0186712	0.939525
miR-135b	up	TTLL7	down	-0.589678	0.00787821	-0.120015	0.170463	0.0121479	0.842213	-0.589678	0.00787821	0.0328381	0.893833
miR-145	down	SOX9	up	-0.589372	0.00791859	0.109909	0.209641	0.0192988	0.751806	-0.589372	0.00791859	-0.165509	0.498308
miR-335	up	HIC1	down	-0.588992	0.00796888	-0.237013	0.00621392	-0.123843	0.0416357	-0.588992	0.00796888	-0.0112379	0.963581
miR-425	up	FOXN3	down	-0.588963	0.00797279	-0.122617	0.161317	-0.239388	6.87324e-05	-0.588963	0.00797279	-0.148527	0.543955
miR-17	up	FBXL7	down	-0.588866	0.00798566	-0.417021	6.55282e-07	-0.417342	7.5924e-13	-0.588866	0.00798566	0.0265653	0.914033
miR-490	down	ZNF681	up	-0.587177	0.0082128	-0.145086	0.0969454	0.0311284	0.609917	-0.587177	0.0082128	-0.0540423	0.826079
miR-671	up	HSPB8	down	-0.587074	0.00822685	-0.102739	0.241095	-0.296652	6.58131e-07	-0.587074	0.00822685	-0.296366	0.217934
miR-378a	down	TM4SF5	up	-0.586885	0.00825256	0.0391174	0.656088	-0.0161381	0.791428	-0.586885	0.00825256	-0.094681	0.699826
miR-5698	down	PGBD5	up	-0.586841	0.00825869	0.121936	0.163674	0.0334131	0.583925	-0.586841	0.00825869	0.0738873	0.763709
miR-455	up	CCSER2	down	-0.586369	0.00832333	0.0739119	0.399643	-0.0933658	0.125216	-0.586369	0.00832333	0.0991483	0.686334
miR-6892	down	E2F8	up	-0.586115	0.0083583	-0.0735354	0.402055	-0.15385	0.0112092	-0.586115	0.0083583	0.228006	0.347818
miR-6892	down	OLR1	up	-0.585928	0.00838412	0.184463	0.0342286	0.175087	0.00383594	-0.585928	0.00838412	0.375786	0.112838
miR-195	down	MYB	up	-0.585926	0.00838451	0.0254683	0.771914	-0.122561	0.0438126	-0.585926	0.00838451	0.0695288	0.777302
miR-17	up	CCND2	down	-0.585591	0.00843096	-0.378717	7.54534e-06	-0.367435	4.36357e-10	-0.585591	0.00843096	-0.0477142	0.846198
miR-340	down	APOL4	up	-0.585363	0.00846263	-0.234821	0.00672356	-0.081007	0.183661	-0.585363	0.00846263	-0.12532	0.609215
miR-335	up	FBLN2	down	-0.585361	0.00846298	-0.0554279	0.527879	-0.0419196	0.491959	-0.585361	0.00846298	-0.131519	0.591475
miR-17	up	SERINC1	down	-0.585218	0.00848289	-0.0274097	0.755058	-0.175844	0.00368375	-0.585218	0.00848289	0.0685692	0.780304
miR-23b	down	PLAU	up	-0.585009	0.0085121	0.10764	0.21926	-0.0293351	0.630668	-0.585009	0.0085121	0.0898877	0.714399
miR-335	up	ATXN1	down	-0.584808	0.0085403	-0.294181	0.000617457	-0.152632	0.011877	-0.584808	0.0085403	0.153465	0.53049
miR-671	up	ZNF853	down	-0.58462	0.00856672	0.104399	0.233535	-0.163587	0.00696042	-0.58462	0.00856672	0.143248	0.558519
miR-31	up	IL5RA	down	-0.584576	0.00857295	-0.217482	0.0122461	-0.0933007	0.125481	-0.584576	0.00857295	-0.153248	0.531078
miR-17	up	NACC2	down	-0.584545	0.00857733	-0.105947	0.226638	-0.257292	1.79963e-05	-0.584545	0.00857733	0.0116053	0.962391
miR-17	up	PPP1R12B	down	-0.584364	0.0086028	-0.380537	6.76406e-06	-0.370582	3.01504e-10	-0.584364	0.0086028	-0.508306	0.0262723
miR-100	down	ALG3	up	-0.584119	0.00863755	0.153372	0.0791303	-0.0785408	0.197412	-0.584119	0.00863755	-0.135104	0.581315
miR-335	up	PEG3	down	-0.583934	0.00866376	0.0281185	0.748932	0.029315	0.630901	-0.583934	0.00866376	-0.0846942	0.730297
miR-203a	up	LIFR	down	-0.583916	0.00866625	-0.298303	0.000512593	-0.184995	0.00222994	-0.583916	0.00866625	-0.520203	0.0224176
miR-335	up	FAM229B	down	-0.583671	0.00870117	-0.117089	0.181202	-0.171507	0.00463558	-0.583671	0.00870117	-0.0387454	0.874867
miR-21	up	LIFR	down	-0.583502	0.00872536	-0.0138251	0.874981	0.0415228	0.496071	-0.583502	0.00872536	-0.159019	0.515533
miR-23b	down	RAD51	up	-0.583227	0.00876467	-0.272269	0.0015871	-0.253014	2.50155e-05	-0.583227	0.00876467	-0.402923	0.0871824
miR-200c	up	TRPS1	down	-0.58314	0.00877712	-0.479878	5.80949e-09	-0.41356	1.2764e-12	-0.58314	0.00877712	-0.485509	0.0350949
miR-3074	up	PDLIM5	down	-0.583102	0.00878263	-0.304651	0.000382752	-0.263697	1.08732e-05	-0.583102	0.00878263	-0.504904	0.0274647
miR-183	up	REV3L	down	-0.582711	0.0088389	-0.19188	0.027518	-0.0570709	0.349312	-0.582711	0.0088389	0.113882	0.642493
miR-335	up	LILRB5	down	-0.582055	0.00893411	-0.276845	0.00131127	-0.207986	0.000569326	-0.582055	0.00893411	0.0701706	0.775297
miR-31	up	DMD	down	-0.581942	0.00895052	-0.135206	0.12217	-0.077545	0.203171	-0.581942	0.00895052	-0.0501936	0.838304
miR-455	up	C3	down	-0.581859	0.00896259	0.0201992	0.818179	-0.110508	0.0693162	-0.581859	0.00896259	-0.192599	0.42955
miR-455	up	BNC2	down	-0.58185	0.00896401	0.146783	0.0930586	-0.0911747	0.134366	-0.58185	0.00896401	-0.5068	0.026795
miR-31	up	JAZF1	down	-0.58178	0.00897427	0.0335782	0.702296	0.0396374	0.515851	-0.58178	0.00897427	-0.0493109	0.841113
miR-17	up	BCL2L2	down	-0.581775	0.00897499	0.021234	0.809038	0.0499994	0.412329	-0.581775	0.00897499	0.300875	0.210679
miR-192	up	DNAJB5	down	-0.581715	0.00898365	-0.334728	8.74784e-05	-0.323379	5.15444e-08	-0.581715	0.00898365	-0.248155	0.305652
miR-335	up	PLXNA4	down	-0.581364	0.00903512	-0.109905	0.209656	-0.0656815	0.281293	-0.581364	0.00903512	0.118673	0.62847
miR-455	up	KLHL30	down	-0.580838	0.00911279	0.0332927	0.704709	-0.105671	0.0824944	-0.580838	0.00911279	-0.101244	0.680036
miR-149	up	XKR4	down	-0.580018	0.00923485	-0.28608	0.00088315	-0.177346	0.00339779	-0.580018	0.00923485	0.264061	0.274652
miR-145	down	MEST	up	-0.579709	0.00928112	-0.024559	0.779846	0.0683817	0.261941	-0.579709	0.00928112	-0.24737	0.307236
miR-224	up	MEF2D	down	-0.579641	0.00929127	-0.0189414	0.829323	-0.05063	0.406451	-0.579641	0.00929127	-0.202333	0.406133
miR-642a	up	TXLNB	down	-0.579554	0.00930438	-0.203129	0.0194917	-0.192033	0.00149186	-0.579554	0.00930438	-0.471567	0.0415247
miR-17	up	ARHGAP10	down	-0.579527	0.0093085	-0.0575687	0.512038	-0.222254	0.000225952	-0.579527	0.0093085	-0.0753272	0.759233
miR-455	up	PTGES3L	down	-0.579304	0.00934211	-0.0925362	0.291282	-0.0947594	0.119653	-0.579304	0.00934211	-0.237863	0.326788
miR-27b	down	DPF1	up	-0.578757	0.00942504	0.0336651	0.701562	-0.187457	0.00194048	-0.578757	0.00942504	-0.442348	0.0579027
miR-181b-2	up	ELMSAN1	down	-0.578519	0.00946129	-0.159797	0.0672135	-0.073448	0.228147	-0.578519	0.00946129	0.0698199	0.776393
miR-425	up	ZHX3	down	-0.578143	0.00951875	-0.289112	0.000773387	-0.315168	1.15787e-07	-0.578143	0.00951875	-0.189964	0.436007
miR-335	up	FBLN5	down	-0.577864	0.00956163	-0.136446	0.11875	-0.0960775	0.114571	-0.577864	0.00956163	-0.252048	0.29788
miR-6499	up	KCNE4	down	-0.577794	0.00957235	0.020565	0.814945	-0.260952	1.35154e-05	-0.577794	0.00957235	-0.431389	0.0651609
miR-100	down	DCBLD1	up	-0.577576	0.00960609	0.343549	5.50701e-05	0.134789	0.0265017	-0.577576	0.00960609	-0.109688	0.654867
miR-335	up	ZCCHC24	down	-0.577501	0.00961765	-0.229183	0.00820897	-0.111132	0.0677501	-0.577501	0.00961765	0.0464741	0.850152
miR-6499	up	OSBPL10	down	-0.576605	0.00975699	-0.0837888	0.339485	-0.177937	0.00329093	-0.576605	0.00975699	-0.17798	0.466013
miR-335	up	GSN	down	-0.576529	0.00976892	-0.203454	0.0192936	-0.122319	0.044233	-0.576529	0.00976892	-0.454298	0.0507021
miR-7156	down	DRAXIN	up	-0.576525	0.00976957	0.257163	0.00291357	0.0886805	0.145396	-0.576525	0.00976957	0.289155	0.229872
miR-455	up	CLIC4	down	-0.575979	0.00985528	0.217579	0.0122067	0.142816	0.0186605	-0.575979	0.00985528	0.179338	0.462563
miR-490	down	ZNF695	up	-0.57593	0.00986296	-0.111016	0.20506	-0.156209	0.0100104	-0.57593	0.00986296	-0.322899	0.177535
miR-210	up	NFIC	down	-0.575722	0.00989595	-0.157529	0.0712402	-0.240545	6.32193e-05	-0.575722	0.00989595	-0.396129	0.0931597
miR-378c	down	KCNJ6	up	-0.575282	0.00996574	0.0211616	0.809677	-0.281053	2.59635e-06	-0.575282	0.00996574	-0.34219	0.151564
miR-192	up	FGF2	down	-0.574744	0.0100517	-0.336006	8.18743e-05	-0.24154	5.88151e-05	-0.574744	0.0100517	-0.112607	0.646245
miR-130b	up	EPHX2	down	-0.574075	0.0101593	-0.236605	0.00630613	-0.256502	1.91334e-05	-0.574075	0.0101593	-0.370737	0.11815
miR-6499	up	SCRG1	down	-0.573412	0.0102668	-0.10908	0.21312	-0.233146	0.000107129	-0.573412	0.0102668	-0.152642	0.532724
miR-642a	up	PDE4D	down	-0.573087	0.0103199	0.225968	0.00918031	0.0271696	0.656116	-0.573087	0.0103199	0.0643909	0.793406
miR-3074	up	FBXO31	down	-0.571853	0.0105235	-0.0606711	0.489525	-0.201368	0.000856591	-0.571853	0.0105235	-0.36638	0.122875
miR-335	up	ROR2	down	-0.571615	0.0105632	-0.326258	0.000134662	-0.277652	3.46434e-06	-0.571615	0.0105632	0.0786491	0.748934
miR-149	up	ABL1	down	-0.571371	0.0106039	-0.142654	0.102735	-0.172057	0.00450383	-0.571371	0.0106039	0.254621	0.292807
miR-17	up	DNAJB4	down	-0.571185	0.0106351	-0.235391	0.00658773	-0.198369	0.00102648	-0.571185	0.0106351	-0.193788	0.42665
miR-93	up	RBM20	down	-0.571101	0.0106492	-0.0552653	0.529093	-0.057096	0.349099	-0.571101	0.0106492	0.252986	0.296024
miR-671	up	GJC1	down	-0.570243	0.0107939	-0.189509	0.0295291	-0.125208	0.0394199	-0.570243	0.0107939	0.158409	0.517165
miR-100	down	SMPDL3B	up	-0.570235	0.0107954	-0.0694798	0.428578	-0.123649	0.0419593	-0.570235	0.0107954	-0.0048818	0.984175
miR-138-1	up	CYBRD1	down	-0.570207	0.0108001	0.0850868	0.332029	0.0481565	0.42979	-0.570207	0.0108001	-0.255247	0.29158
miR-17	up	ITPKB	down	-0.570014	0.010833	-0.118309	0.176667	-0.112341	0.0647961	-0.570014	0.010833	-0.223399	0.357907
miR-455	up	RIMS3	down	-0.56975	0.0108779	-0.0259028	0.768132	0.0424253	0.486746	-0.56975	0.0108779	0.0876956	0.721096
miR-455	up	MAP1B	down	-0.569731	0.0108811	0.0189441	0.829299	-0.131519	0.0304282	-0.569731	0.0108811	-0.279005	0.247377
miR-142	up	TGFBR2	down	-0.569532	0.0109152	0.137189	0.116737	0.203366	0.00075822	-0.569532	0.0109152	0.13536	0.580594
miR-203a	up	DLC1	down	-0.568774	0.0110456	-0.126136	0.149538	-0.0967776	0.111941	-0.568774	0.0110456	0.185424	0.447254
miR-671	up	MAOB	down	-0.5685	0.0110931	-0.374743	9.55791e-06	-0.385032	5.24077e-11	-0.5685	0.0110931	-0.186562	0.444421
miR-182	up	PGM2L1	down	-0.56781	0.0112133	-0.284262	0.000955634	-0.0944298	0.120951	-0.56781	0.0112133	-0.076213	0.756483
miR-335	up	SGCD	down	-0.567586	0.0112525	-0.136297	0.119158	-0.0587659	0.335161	-0.567586	0.0112525	0.379337	0.109205
miR-203a	up	KLHL15	down	-0.567434	0.0112792	-0.369816	1.27593e-05	-0.111146	0.0677157	-0.567434	0.0112792	-0.126406	0.60609
miR-6499	up	TMEM56	down	-0.566469	0.0114499	-0.470428	1.25806e-08	-0.191972	0.00149713	-0.566469	0.0114499	-0.173421	0.477697
miR-17	up	GPR155	down	-0.566444	0.0114544	-0.234368	0.00683341	-0.281372	2.52659e-06	-0.566444	0.0114544	-0.307847	0.199776
miR-142	up	PRKCB	down	-0.56644	0.0114552	0.4657	1.83584e-08	0.519121	4.21833e-20	-0.56644	0.0114552	0.431667	0.0649688
miR-203a	up	GATA6	down	-0.566429	0.011457	-0.158732	0.0690808	-0.246182	4.18237e-05	-0.566429	0.011457	-0.310664	0.195481
miR-425	up	KLHL15	down	-0.565736	0.0115809	-0.0400193	0.64868	-0.0218303	0.720527	-0.565736	0.0115809	0.306547	0.201781
miR-335	up	MLXIP	down	-0.565388	0.0116436	-0.156329	0.0734507	-0.0504022	0.408569	-0.565388	0.0116436	0.0927212	0.705773
miR-335	up	ZBTB20	down	-0.565198	0.0116779	-0.0850114	0.332459	0.0476484	0.434679	-0.565198	0.0116779	0.618905	0.00472416
miR-149	up	LRIG1	down	-0.56513	0.0116903	-0.389967	3.79848e-06	-0.223737	0.000204554	-0.56513	0.0116903	0.0688449	0.779441
miR-335	up	ATP8B2	down	-0.565126	0.011691	-0.201252	0.0206707	-0.135234	0.0260021	-0.565126	0.011691	0.0559915	0.819903
miR-149	up	LONRF2	down	-0.564876	0.0117362	-0.0541288	0.537611	0.102983	0.0906501	-0.564876	0.0117362	0.0941749	0.701361
miR-210	up	SCN1B	down	-0.564543	0.0117969	-0.366911	1.5095e-05	-0.419623	5.53218e-13	-0.564543	0.0117969	-0.0240171	0.922254
miR-6892	down	OCIAD2	up	-0.56345	0.0119975	-0.0791394	0.367051	-0.0877214	0.149817	-0.56345	0.0119975	0.0856597	0.727333
miR-17	up	ATXN1	down	-0.56317	0.0120494	-0.30364	0.000401156	-0.292494	9.56503e-07	-0.56317	0.0120494	-0.215261	0.376134
miR-335	up	TBX5	down	-0.563028	0.0120757	-0.015131	0.863281	0.0300331	0.622554	-0.563028	0.0120757	0.00129508	0.995802
miR-203a	up	KIF13A	down	-0.56248	0.0121777	0.164952	0.0587445	0.054976	0.367313	-0.56248	0.0121777	0.266975	0.269195
miR-3074	up	NECAB1	down	-0.562329	0.012206	0.276467	0.00133227	0.103522	0.0889648	-0.562329	0.012206	0.261361	0.279773
miR-203a	up	BMPR1A	down	-0.562315	0.0122086	-0.00259362	0.976454	0.202556	0.000796753	-0.562315	0.0122086	0.31361	0.191053
miR-335	up	KLHL4	down	-0.56226	0.0122191	-0.330676	0.000107696	-0.1589	0.00878254	-0.56226	0.0122191	-0.0911366	0.710593
miR-335	up	KIAA1644	down	-0.561816	0.0123026	-0.360864	2.13088e-05	-0.120822	0.0469137	-0.561816	0.0123026	-0.0435554	0.859471
miR-6499	up	DMD	down	-0.561675	0.0123291	-0.227239	0.00878469	-0.212098	0.000438888	-0.561675	0.0123291	-0.412526	0.0792203
miR-335	up	DOK6	down	-0.561512	0.0123599	-0.0225226	0.797691	-0.0836965	0.169485	-0.561512	0.0123599	0.0784587	0.749523
miR-192	up	PDLIM3	down	-0.56148	0.012366	-0.327143	0.000128798	-0.324743	4.49529e-08	-0.56148	0.012366	-0.133293	0.586438
miR-192	up	CLIP4	down	-0.561447	0.0123722	-0.322328	0.000163806	-0.266211	8.88967e-06	-0.561447	0.0123722	-0.133908	0.584697
miR-455	up	CCDC80	down	-0.561213	0.0124166	0.153081	0.0797076	-0.0444344	0.466332	-0.561213	0.0124166	-0.505196	0.027361
miR-210	up	SH3BGRL	down	-0.561193	0.0124204	-0.268951	0.00181905	-0.302355	3.90297e-07	-0.561193	0.0124204	-0.317915	0.184705
miR-149	up	BVES	down	-0.561129	0.0124326	-0.198427	0.0225602	-0.198196	0.0010372	-0.561129	0.0124326	0.184469	0.44964
miR-27b	down	LMNB2	up	-0.560449	0.0125625	-0.0152435	0.862275	-0.324725	4.50333e-08	-0.560449	0.0125625	-0.274018	0.25628
miR-149	up	OSBPL10	down	-0.559941	0.0126601	-0.0777536	0.375528	0.0445557	0.465114	-0.559941	0.0126601	0.456774	0.0492991
miR-335	up	CCND2	down	-0.559347	0.0127751	-0.24902	0.00398538	-0.124666	0.0402882	-0.559347	0.0127751	-0.0318164	0.897119
miR-203a	up	SYNM	down	-0.559149	0.0128138	-0.14339	0.100954	-0.109104	0.072951	-0.559149	0.0128138	-0.158813	0.516082
miR-142	up	CPEB2	down	-0.559093	0.0128246	0.100498	0.251566	0.0484497	0.426985	-0.559093	0.0128246	0.268578	0.266219
miR-200b	up	CLIP1	down	-0.558968	0.0128491	-0.0385551	0.660724	0.00721021	0.90595	-0.558968	0.0128491	0.407619	0.0832189
miR-4636	up	NACC2	down	-0.558691	0.0129032	-0.247069	0.00428974	-0.305153	3.00795e-07	-0.558691	0.0129032	-0.0756291	0.758295
miR-31	up	NLGN1	down	-0.558454	0.0129496	-0.141949	0.104464	-0.0369463	0.544775	-0.558454	0.0129496	0.0517504	0.833355
miR-31	up	MXRA7	down	-0.558453	0.0129499	0.204988	0.0183821	0.0467146	0.443746	-0.558453	0.0129499	-0.225903	0.352403
miR-192	up	MAPRE2	down	-0.558434	0.0129535	-0.224063	0.00980235	-0.201392	0.000855341	-0.558434	0.0129535	-0.102954	0.674911
miR-374b	down	DHCR7	up	-0.558424	0.0129555	-0.075916	0.38695	-0.170361	0.00492155	-0.558424	0.0129555	-0.0542948	0.825279
miR-3074	up	ABCD2	down	-0.558278	0.0129842	0.221889	0.0105572	-0.0178904	0.769388	-0.558278	0.0129842	-0.247806	0.306356
miR-335	up	AKAP12	down	-0.558169	0.0130057	-0.0451175	0.607468	-0.020144	0.741315	-0.558169	0.0130057	0.0507974	0.836384
miR-3065	up	FAM102B	down	-0.557879	0.0130631	0.00410883	0.962706	0.113955	0.0610183	-0.557879	0.0130631	0.362316	0.127402
miR-548ba	down	PLA2G2F	up	-0.557469	0.0131445	-0.176759	0.0426133	-0.0374615	0.539176	-0.557469	0.0131445	-0.254348	0.293342
miR-335	up	ANTXR2	down	-0.557442	0.0131497	-0.150139	0.0857386	-0.1852	0.00220443	-0.557442	0.0131497	-0.0719992	0.76959
miR-4786	down	TRIM17	up	-0.557266	0.0131849	-0.218476	0.0118458	-0.119908	0.0486169	-0.557266	0.0131849	0.0482545	0.844477
miR-335	up	LMOD1	down	-0.557227	0.0131925	-0.163759	0.0606228	-0.0785763	0.197209	-0.557227	0.0131925	-0.298974	0.213719
miR-335	up	CLEC3B	down	-0.557172	0.0132036	-0.146566	0.0935495	-0.0682733	0.2627	-0.557172	0.0132036	-0.332144	0.164738
miR-335	up	KCNH2	down	-0.557135	0.0132109	-0.0378404	0.666634	0.0323081	0.596432	-0.557135	0.0132109	-0.331686	0.165357
miR-204	down	HCAR2	up	-0.556641	0.0133099	-0.0211382	0.809884	-0.284238	1.97487e-06	-0.556641	0.0133099	-0.664064	0.00193065
miR-100	down	CDCP1	up	-0.556615	0.013315	0.220188	0.0111832	-0.0497682	0.414496	-0.556615	0.013315	-0.00258342	0.991625
miR-335	up	IGDCC4	down	-0.556571	0.0133239	-0.0640535	0.465593	-0.0260184	0.66981	-0.556571	0.0133239	0.374533	0.114139
miR-149	up	TMTC1	down	-0.556473	0.0133436	-0.142032	0.104259	-0.0877054	0.149891	-0.556473	0.0133436	0.224031	0.356513
miR-139	down	ALOX15	up	-0.556361	0.0133662	-0.0491204	0.575943	0.0158043	0.795647	-0.556361	0.0133662	0.0669874	0.785258
miR-335	up	C20orf194	down	-0.555736	0.0134926	0.123487	0.158342	0.159101	0.00869651	-0.555736	0.0134926	0.447045	0.0549857
miR-17	up	TMEM100	down	-0.555549	0.0135305	-0.250834	0.00371996	-0.386481	4.37625e-11	-0.555549	0.0135305	-0.481162	0.0370106
miR-149	up	AKAP13	down	-0.555543	0.0135317	-0.0487927	0.578495	-0.185398	0.0021801	-0.555543	0.0135317	-0.00887763	0.971226
miR-335	up	TACR2	down	-0.555534	0.0135336	-0.133531	0.12691	-0.0282423	0.643458	-0.555534	0.0135336	-0.0705445	0.774129
miR-335	up	NAALAD2	down	-0.555524	0.0135357	0.0293906	0.737977	0.116437	0.0555628	-0.555524	0.0135357	0.460549	0.0472176
miR-7156	down	ERBB2	up	-0.555459	0.0135489	-0.133677	0.12649	-0.0272505	0.655157	-0.555459	0.0135489	-0.241236	0.319769
miR-335	up	MGP	down	-0.555071	0.0136281	-0.184338	0.0343524	-0.0632717	0.299359	-0.555071	0.0136281	-0.228893	0.345894
miR-143	down	DNAJB13	up	-0.554929	0.0136572	-0.189947	0.0291491	0.0933261	0.125378	-0.554929	0.0136572	0.100077	0.68354
miR-204	down	TMPRSS3	up	-0.554653	0.013714	0.138731	0.112643	0.0808678	0.184419	-0.554653	0.013714	0.123036	0.615805
miR-6499	up	MCAM	down	-0.554613	0.0137221	-0.0685842	0.434568	-0.313091	1.41548e-07	-0.554613	0.0137221	-0.539025	0.0172446
miR-17	up	SACS	down	-0.554082	0.0138318	0.102327	0.242994	-0.00123916	0.9838	-0.554082	0.0138318	0.166971	0.494468
miR-192	up	ARHGEF10	down	-0.554073	0.0138337	-0.12114	0.166464	-0.0812714	0.18223	-0.554073	0.0138337	-0.0795819	0.746049
miR-335	up	GPR17	down	-0.553898	0.0138701	-0.207002	0.0172421	-0.0435658	0.475098	-0.553898	0.0138701	0.0472906	0.847549
miR-4724	up	PRKACB	down	-0.553796	0.0138912	-0.050717	0.563586	-0.110946	0.0682132	-0.553796	0.0138912	-0.258754	0.28477
miR-6499	up	XKR4	down	-0.553465	0.0139602	-0.285902	0.000889994	-0.211167	0.000465747	-0.553465	0.0139602	-0.437104	0.0612957
miR-6499	up	KLHL30	down	-0.553227	0.0140099	0.300952	0.000454143	-0.0541729	0.374364	-0.553227	0.0140099	0.165771	0.497619
miR-4724	up	KCNN3	down	-0.55264	0.014133	-0.228623	0.00837145	-0.131126	0.030932	-0.55264	0.014133	0.349935	0.141918
miR-335	up	ANK2	down	-0.552624	0.0141364	-0.19345	0.0262519	-0.150224	0.0133002	-0.552624	0.0141364	0.281901	0.242299
miR-335	up	MBD5	down	-0.552463	0.0141704	-0.0117961	0.893211	-0.0345963	0.57067	-0.552463	0.0141704	0.285767	0.235623
miR-142	up	MGLL	down	-0.552049	0.014258	0.277478	0.00127677	0.233992	0.000100946	-0.552049	0.014258	0.42632	0.0687398
miR-17	up	PPP1R3B	down	-0.551974	0.014274	-0.373679	1.01771e-05	-0.277584	3.48415e-06	-0.551974	0.014274	-0.506096	0.0270423
miR-224	up	EDNRA	down	-0.551948	0.0142795	-0.0701711	0.423988	-0.123187	0.042737	-0.551948	0.0142795	-0.10462	0.669933
miR-149	up	FGFR1	down	-0.551885	0.0142929	-0.259573	0.00265063	-0.118696	0.0509549	-0.551885	0.0142929	0.472221	0.0412042
miR-339	up	ZNF460	down	-0.551367	0.0144033	0.18035	0.0385132	0.0187121	0.759115	-0.551367	0.0144033	-0.148222	0.544791
miR-23b	down	LMNB1	up	-0.550766	0.0145325	-0.277218	0.00129085	-0.273162	5.04027e-06	-0.550766	0.0145325	-0.389661	0.0991221
miR-32	up	FBLN2	down	-0.550736	0.0145389	-0.0331104	0.706252	-0.150321	0.0132398	-0.550736	0.0145389	0.250231	0.301493
miR-4668	up	MKX	down	-0.550522	0.014585	-0.0202867	0.817406	-0.0711488	0.24308	-0.550522	0.014585	-0.0324443	0.895099
miR-6892	down	KSR2	up	-0.550063	0.0146846	-0.190035	0.029073	-0.151661	0.0124336	-0.550063	0.0146846	0.160117	0.512598
miR-183	up	DNAJB4	down	-0.549583	0.0147893	-0.423252	4.27548e-07	-0.289736	1.22175e-06	-0.549583	0.0147893	-0.293551	0.222545
miR-6499	up	SCN3B	down	-0.548842	0.0149518	-0.0488025	0.578419	-0.151018	0.012815	-0.548842	0.0149518	-0.390986	0.0978789
miR-335	up	HSPG2	down	-0.548797	0.0149618	-0.115774	0.186187	-0.0274841	0.652394	-0.548797	0.0149618	-0.220705	0.363885
miR-335	up	SOX5	down	-0.548658	0.0149924	0.0416874	0.63507	-0.0310348	0.610992	-0.548658	0.0149924	0.0236117	0.923563
miR-17	up	DPYSL2	down	-0.548583	0.0150091	-0.0635492	0.46912	-0.283789	2.053e-06	-0.548583	0.0150091	0.279869	0.245854
miR-577	up	CLIP4	down	-0.548463	0.0150356	0.116451	0.183609	0.0232289	0.70344	-0.548463	0.0150356	0.3044	0.205119
miR-1270	up	IGFBP5	down	-0.548387	0.0150525	-0.0166038	0.850123	-0.162867	0.00721607	-0.548387	0.0150525	-0.0264108	0.914532
miR-6507	down	ZIC5	up	-0.548158	0.0151031	0.24768	0.0041923	-0.0196254	0.747747	-0.548158	0.0151031	-0.0164192	0.946809
miR-335	up	FGL2	down	-0.54813	0.0151094	-0.243568	0.00488868	-0.219138	0.000277895	-0.54813	0.0151094	-0.0043781	0.985808
miR-339	up	CHRM3	down	-0.547479	0.0152546	-0.0956875	0.27509	-0.0825288	0.175536	-0.547479	0.0152546	0.0471838	0.847889
miR-93	up	FER	down	-0.547221	0.0153125	-0.243563	0.0048895	-0.26571	9.25551e-06	-0.547221	0.0153125	-0.310713	0.195407
miR-590	up	PRKAR2B	down	-0.547196	0.0153181	0.00839068	0.923929	-0.18876	0.00180157	-0.547196	0.0153181	-0.386924	0.101727
miR-6499	up	ZNF106	down	-0.547195	0.0153185	0.0607679	0.488831	0.166531	0.0059963	-0.547195	0.0153185	0.616476	0.00493849
miR-671	up	ZBTB4	down	-0.546357	0.0155076	-0.0283883	0.746604	-0.263318	1.12059e-05	-0.546357	0.0155076	-0.343838	0.149475
miR-145	down	KRT7	up	-0.546233	0.0155358	-0.112313	0.199785	0.00730387	0.904734	-0.546233	0.0155358	-0.114646	0.640248
miR-149	up	LONRF3	down	-0.545685	0.0156607	-0.057263	0.514285	-0.0378566	0.534902	-0.545685	0.0156607	-0.0880419	0.720037
miR-425	up	ZNF460	down	-0.545561	0.0156891	-0.0932741	0.287435	-0.0629478	0.301845	-0.545561	0.0156891	-0.0701926	0.775228
miR-138-1	up	MEOX2	down	-0.545414	0.015723	-0.0176028	0.84122	-0.0336781	0.580945	-0.545414	0.015723	0.238879	0.324664
miR-31	up	ITGA5	down	-0.545029	0.0158114	0.116378	0.183885	0.052383	0.390376	-0.545029	0.0158114	0.0644935	0.793084
miR-335	up	CLIC4	down	-0.544843	0.0158543	-0.329966	0.000111662	-0.212765	0.000420576	-0.544843	0.0158543	0.193748	0.426748
miR-490	down	RAD51	up	-0.544809	0.0158621	-0.0395915	0.65219	-0.259602	1.50291e-05	-0.544809	0.0158621	-0.392763	0.0962292
miR-4728	up	CRISPLD2	down	-0.544476	0.0159393	-0.120619	0.168309	-0.218385	0.000292019	-0.544476	0.0159393	0.131867	0.590486
miR-455	up	IGSF9B	down	-0.544383	0.0159609	-0.169074	0.0526216	-0.23876	7.19098e-05	-0.544383	0.0159609	-0.257527	0.287142
miR-23b	down	DONSON	up	-0.54419	0.0160057	-0.308176	0.000324513	-0.183199	0.00246532	-0.54419	0.0160057	-0.284937	0.237046
miR-335	up	SYNPO2	down	-0.544052	0.016038	-0.193003	0.0266067	-0.0469395	0.441553	-0.544052	0.016038	-0.131249	0.592244
miR-335	up	PREX2	down	-0.543859	0.0160831	0.0446829	0.610935	0.0882072	0.147565	-0.543859	0.0160831	0.145308	0.552814
miR-335	up	PODN	down	-0.543567	0.0161513	-0.0875017	0.318439	-0.0184211	0.762749	-0.543567	0.0161513	-0.0224238	0.927399
miR-204	down	SLC39A11	up	-0.54353	0.01616	-0.0626732	0.47528	-0.10453	0.0858816	-0.54353	0.01616	-0.170086	0.486332
miR-4728	up	DSEL	down	-0.543446	0.0161798	-0.164749	0.0590606	-0.144244	0.0175008	-0.543446	0.0161798	-0.0238056	0.922937
miR-1301	up	ZNF25	down	-0.543397	0.0161913	-0.0498123	0.570572	-0.0557042	0.360991	-0.543397	0.0161913	-0.0552536	0.82224
miR-149	up	ZNF460	down	-0.543009	0.0162825	0.0200938	0.819112	-0.0310811	0.610459	-0.543009	0.0162825	-0.0625377	0.799234
miR-335	up	TRPC1	down	-0.541735	0.0165855	-0.181545	0.0372242	-0.0304145	0.618141	-0.541735	0.0165855	0.364026	0.125484
miR-4728	up	NPR1	down	-0.541664	0.0166025	-0.245517	0.00454674	-0.218957	0.000281231	-0.541664	0.0166025	0.107584	0.661106
miR-455	up	EPHA7	down	-0.540575	0.0168651	-0.326953	0.000130038	-0.369491	3.42878e-10	-0.540575	0.0168651	-0.0464158	0.850338
miR-525	up	GPM6B	down	-0.540548	0.0168717	-0.232636	0.00726818	-0.234132	9.99549e-05	-0.540548	0.0168717	-0.0029183	0.99054
miR-335	up	TGFBR2	down	-0.540343	0.0169213	-0.119179	0.173482	-0.0664274	0.275853	-0.540343	0.0169213	0.0336764	0.891138
miR-335	up	RASSF8	down	-0.540056	0.0169913	-0.136873	0.117591	-0.170791	0.00481248	-0.540056	0.0169913	0.41466	0.0775258
miR-192	up	CCND2	down	-0.53857	0.0173572	-0.278247	0.00123596	-0.196016	0.001181	-0.53857	0.0173572	-0.0498784	0.839307
miR-335	up	CHRM2	down	-0.538089	0.017477	-0.138897	0.112211	-0.0532815	0.382287	-0.538089	0.017477	-0.173176	0.478328
miR-340	down	PLAG1	up	-0.538074	0.0174807	-0.0096374	0.912667	-0.209489	0.000517968	-0.538074	0.0174807	-0.272863	0.25837
miR-301a	up	ELL2	down	-0.537937	0.0175151	-0.232475	0.00730994	-0.16601	0.00615766	-0.537937	0.0175151	0.112643	0.646139
miR-149	up	CALD1	down	-0.537743	0.0175634	-0.203939	0.0190013	-0.182176	0.00260932	-0.537743	0.0175634	0.162837	0.505366
miR-210	up	FOXN3	down	-0.537682	0.0175787	-0.106795	0.222921	-0.341701	7.74938e-09	-0.537682	0.0175787	-0.136924	0.576187
miR-942	up	PRKD1	down	-0.537593	0.017601	-0.40618	1.34993e-06	-0.410097	2.04258e-12	-0.537593	0.017601	-0.250534	0.300887
miR-17	up	PRKCA	down	-0.537437	0.0176403	0.241638	0.00524978	-0.0636241	0.29667	-0.537437	0.0176403	0.165972	0.49709
miR-17	up	KCNJ8	down	-0.536926	0.0177693	-0.253469	0.00336267	-0.328068	3.21116e-08	-0.536926	0.0177693	-0.166008	0.496997
miR-1301	up	ADCY9	down	-0.536842	0.0177904	-0.197768	0.0230221	-0.136044	0.0251144	-0.536842	0.0177904	-0.182367	0.454911
miR-6499	up	PTGES3L	down	-0.536622	0.0178464	-0.121722	0.164423	-0.12596	0.0382431	-0.536622	0.0178464	-0.201874	0.40722
miR-30a	down	CACNA1E	up	-0.536591	0.0178542	-0.0304151	0.729193	-0.108889	0.0735215	-0.536591	0.0178542	-0.404962	0.0854447
miR-192	up	SGMS2	down	-0.536477	0.0178831	-0.122467	0.161834	-0.203512	0.000751457	-0.536477	0.0178831	-0.14035	0.566586
miR-31	up	SYDE2	down	-0.536272	0.0179353	-0.277475	0.00127691	-0.0539677	0.376178	-0.536272	0.0179353	0.326979	0.171807
miR-616	up	TMEM132B	down	-0.535965	0.0180136	-0.0565353	0.519654	-0.0818637	0.179054	-0.535965	0.0180136	-0.369503	0.119475
miR-210	up	SCN7A	down	-0.535782	0.0180604	-0.548571	9.80384e-12	-0.520343	3.33048e-20	-0.535782	0.0180604	-0.371725	0.117097
miR-335	up	NFIB	down	-0.53573	0.0180739	-0.220795	0.0109563	-0.0991849	0.103258	-0.53573	0.0180739	-0.152731	0.532481
miR-335	up	ZDHHC15	down	-0.53568	0.0180866	-0.0744222	0.396387	0.0063377	0.917288	-0.53568	0.0180866	0.142961	0.559315
miR-3074	up	CCND2	down	-0.535581	0.018112	-0.0133247	0.879471	-0.2227	0.000219297	-0.535581	0.018112	0.444979	0.0562547
miR-18a	up	DAAM2	down	-0.535124	0.0182298	-0.0118361	0.89285	-0.241377	5.95148e-05	-0.535124	0.0182298	-0.29156	0.225845
miR-335	up	GFRA1	down	-0.535037	0.0182521	-0.0141029	0.87249	0.0318281	0.601903	-0.535037	0.0182521	-0.0913651	0.709897
miR-210	up	MITF	down	-0.535007	0.0182601	-0.120713	0.167976	-0.393178	1.88067e-11	-0.535007	0.0182601	-0.354431	0.13652
miR-149	up	FLNA	down	-0.534993	0.0182636	-0.163596	0.0608831	-0.267902	7.75474e-06	-0.534993	0.0182636	-0.0370856	0.880189
miR-335	up	RGS22	down	-0.534981	0.0182666	-0.123078	0.159735	-0.11214	0.0652796	-0.534981	0.0182666	0.241895	0.318408
miR-203a	up	KIAA0408	down	-0.534149	0.0184828	-0.268551	0.00184903	-0.0558758	0.359512	-0.534149	0.0184828	-0.0427194	0.862143
miR-192	up	OSBPL10	down	-0.534012	0.0185187	-0.035684	0.68459	-0.0779347	0.200903	-0.534012	0.0185187	-0.144079	0.556215
miR-31	up	PPM1L	down	-0.53377	0.018582	-0.235611	0.00653575	-0.32989	2.66621e-08	-0.53377	0.018582	-0.213484	0.380182
miR-455	up	BMPR1A	down	-0.533588	0.0186298	-0.114218	0.192215	-0.107292	0.0778703	-0.533588	0.0186298	0.0328713	0.893726
miR-20a	up	KATNAL1	down	-0.53324	0.0187212	-0.0660158	0.452008	-0.0522801	0.391308	-0.53324	0.0187212	0.208214	0.392329
miR-23b	down	CABP4	up	-0.53295	0.0187979	-0.16464	0.0592311	-0.136985	0.0241159	-0.53295	0.0187979	0.348742	0.143376
miR-210	up	EHD2	down	-0.532864	0.0188207	-0.184326	0.0343646	-0.156533	0.00985493	-0.532864	0.0188207	-0.0548568	0.823497
miR-17	up	PDLIM7	down	-0.532723	0.018858	-0.183716	0.0349755	-0.218643	0.000287107	-0.532723	0.018858	0.000382899	0.998759
miR-335	up	PLEKHH2	down	-0.532555	0.0189026	-0.125019	0.153205	-0.104573	0.0857515	-0.532555	0.0189026	0.00298512	0.990323
miR-335	up	MAPK4	down	-0.532298	0.0189709	0.0539022	0.539317	0.039703	0.515156	-0.532298	0.0189709	-0.0469033	0.848783
miR-4728	up	PPM1L	down	-0.530829	0.0193656	0.261951	0.00241234	0.316439	1.02318e-07	-0.530829	0.0193656	-0.167807	0.492278
miR-4724	up	DPYSL2	down	-0.53059	0.0194305	-0.393044	3.13455e-06	-0.267498	8.01234e-06	-0.53059	0.0194305	-0.00119616	0.996122
miR-584	up	ROCK1	down	-0.530494	0.0194564	-0.0340673	0.698169	-0.0321958	0.59771	-0.530494	0.0194564	-0.151192	0.536668
miR-3074	up	BNC2	down	-0.530413	0.0194784	0.0459504	0.600846	-0.158184	0.00909532	-0.530413	0.0194784	-0.279977	0.245665
miR-203a	up	STOM	down	-0.53032	0.019504	-0.0204144	0.816276	-0.0224484	0.712959	-0.53032	0.019504	0.0126094	0.95914
miR-135b	up	MPL	down	-0.530216	0.0195323	-0.207476	0.0169827	-0.0795025	0.191964	-0.530216	0.0195323	-0.221445	0.362236
miR-17	up	CHIC1	down	-0.53019	0.0195393	-0.279282	0.00118291	-0.229726	0.000135941	-0.53019	0.0195393	-0.538639	0.0173402
miR-192	up	MCAM	down	-0.530025	0.0195845	-0.193503	0.02621	-0.0990029	0.103895	-0.530025	0.0195845	0.348647	0.143493
miR-17	up	TMEM245	down	-0.529694	0.019675	0.0741408	0.398181	-0.0303373	0.619033	-0.529694	0.019675	-0.0590196	0.810327
miR-4728	up	WWTR1	down	-0.529078	0.0198444	-0.294223	0.000616319	-0.364089	6.43693e-10	-0.529078	0.0198444	-0.263995	0.274776
miR-32	up	SHE	down	-0.52905	0.0198521	-0.108746	0.214535	-0.0718641	0.238363	-0.52905	0.0198521	0.237132	0.328323
miR-1262	down	FLVCR1	up	-0.529038	0.0198556	-0.12851	0.141962	-0.0155252	0.799179	-0.529038	0.0198556	0.269592	0.264349
miR-210	up	MEF2D	down	-0.528139	0.0201052	-0.189211	0.0297909	-0.302839	3.73166e-07	-0.528139	0.0201052	-0.522518	0.0217225
miR-143	down	CHDH	up	-0.52781	0.0201971	-0.149857	0.086336	-0.0283655	0.64201	-0.52781	0.0201971	-0.0954957	0.697359
miR-149	up	MICAL1	down	-0.527532	0.020275	-0.103651	0.23692	-0.125311	0.0392576	-0.527532	0.020275	-0.218943	0.367825
miR-335	up	SATB1	down	-0.527467	0.0202932	-0.0171641	0.845128	0.0544617	0.371818	-0.527467	0.0202932	0.138378	0.572103
miR-4786	down	PDXK	up	-0.527301	0.0203398	-0.101165	0.248415	0.0363811	0.550949	-0.527301	0.0203398	0.015246	0.950605
miR-708	up	MPL	down	-0.526892	0.0204554	0.108555	0.215342	0.0820428	0.178102	-0.526892	0.0204554	-0.0012261	0.996025
miR-335	up	NEGR1	down	-0.526817	0.0204766	-0.158253	0.0699351	-0.0213686	0.726199	-0.526817	0.0204766	-0.0388954	0.874386
miR-142	up	CA5B	down	-0.526308	0.020621	-0.0378227	0.66678	-0.118991	0.0503771	-0.526308	0.020621	-0.0537915	0.826875
miR-335	up	SOBP	down	-0.526178	0.0206582	0.0393955	0.6538	-0.0637141	0.295986	-0.526178	0.0206582	0.240742	0.320792
miR-195	down	CCDC14	up	-0.526172	0.0206598	-0.123176	0.159402	-0.124459	0.0406241	-0.526172	0.0206598	0.0481164	0.844917
miR-335	up	SNED1	down	-0.52616	0.0206633	-0.0837155	0.339909	-0.0838224	0.168842	-0.52616	0.0206633	0.084254	0.731649
miR-224	up	CCSER2	down	-0.525975	0.0207161	-0.0178799	0.838754	0.0658756	0.27987	-0.525975	0.0207161	0.137664	0.574107
miR-192	up	CAV1	down	-0.525901	0.0207372	-0.377218	8.25232e-06	-0.286212	1.66397e-06	-0.525901	0.0207372	-0.222635	0.359598
miR-335	up	MROH8	down	-0.525794	0.0207679	-0.073798	0.400372	-0.0145882	0.811063	-0.525794	0.0207679	-0.134601	0.582738
miR-183	up	PGM2L1	down	-0.525576	0.0208302	-0.219469	0.0114574	-0.105288	0.0836187	-0.525576	0.0208302	0.0952602	0.698072
miR-335	up	RASA3	down	-0.525521	0.0208462	-0.139856	0.10973	-0.202771	0.00078637	-0.525521	0.0208462	0.13499	0.581638
miR-33b	up	BCL2	down	-0.525492	0.0208544	-0.0940738	0.283304	-0.217949	0.000300513	-0.525492	0.0208544	-0.0295951	0.904269
miR-4728	up	NFIX	down	-0.524752	0.0210677	-0.17635	0.0431016	-0.376156	1.55081e-10	-0.524752	0.0210677	-0.12003	0.624519
miR-210	up	NACC2	down	-0.524524	0.021134	-0.348037	4.32858e-05	-0.359477	1.09196e-09	-0.524524	0.021134	-0.222373	0.360177
miR-335	up	DAAM2	down	-0.524246	0.0212146	-0.121983	0.163512	-0.0367309	0.547125	-0.524246	0.0212146	-0.113129	0.644708
miR-335	up	TBL1X	down	-0.524042	0.0212743	-0.0875459	0.318194	-0.0974316	0.109527	-0.524042	0.0212743	-0.163755	0.502936
miR-455	up	DNAJC18	down	-0.523924	0.0213085	-0.104855	0.23149	-0.0575444	0.345321	-0.523924	0.0213085	-0.0441119	0.857693
miR-210	up	NCAM1	down	-0.523633	0.0213937	-0.406326	1.33713e-06	-0.521179	2.83175e-20	-0.523633	0.0213937	-0.271846	0.26022
miR-4728	up	ZCCHC24	down	-0.523093	0.0215525	-0.296227	0.000563157	-0.235822	8.86954e-05	-0.523093	0.0215525	0.127501	0.602948
miR-205	up	CTGF	down	-0.522435	0.0217472	-0.19555	0.0246356	-0.307739	2.35878e-07	-0.522435	0.0217472	-0.434826	0.0628152
miR-335	up	NRP2	down	-0.522136	0.0218361	-0.246339	0.004409	-0.17538	0.00377639	-0.522136	0.0218361	-0.0816578	0.739641
miR-210	up	HIF3A	down	-0.521967	0.0218863	-0.289377	0.000764421	-0.382144	7.48688e-11	-0.521967	0.0218863	-0.179731	0.461566
miR-1304	up	SEMA3E	down	-0.521912	0.0219029	-0.116263	0.184323	-0.016061	0.792402	-0.521912	0.0219029	-0.0116959	0.962098
miR-17	up	C14orf28	down	-0.521708	0.0219639	-0.14973	0.0866071	-0.237435	7.90719e-05	-0.521708	0.0219639	-0.0399055	0.871149
miR-425	up	CELF2	down	-0.521588	0.0219999	-0.131195	0.133753	-0.401738	6.21316e-12	-0.521588	0.0219999	0.0954385	0.697532
miR-224	up	TCEAL1	down	-0.521534	0.0220159	-0.116164	0.1847	-0.0619389	0.309675	-0.521534	0.0220159	0.0828438	0.735987
miR-490	down	HIST1H2BD	up	-0.52133	0.0220772	0.000823456	0.992523	-0.150309	0.0132472	-0.52133	0.0220772	0.00414243	0.986572
miR-335	up	TMTC1	down	-0.521297	0.022087	-0.144579	0.0981302	-0.217974	0.000300009	-0.521297	0.022087	-0.192447	0.42992
miR-335	up	RNASE4	down	-0.521117	0.0221413	-0.0826743	0.34597	-0.0154506	0.800123	-0.521117	0.0221413	0.145476	0.552351
miR-335	up	LMOD3	down	-0.521033	0.0221664	-0.130304	0.136437	-0.0549162	0.367835	-0.521033	0.0221664	0.124896	0.610437
miR-335	up	LRCH2	down	-0.520446	0.0223441	-0.063114	0.472174	-0.0311194	0.610019	-0.520446	0.0223441	0.310896	0.195129
miR-335	up	NECAB1	down	-0.520214	0.0224144	-0.213312	0.0140573	-0.0401473	0.510462	-0.520214	0.0224144	0.290778	0.227149
miR-335	up	ZEB1	down	-0.520044	0.0224662	-0.241903	0.00519886	-0.136857	0.0242495	-0.520044	0.0224662	0.045866	0.852092
miR-335	up	CDC42BPA	down	-0.519794	0.0225423	-0.11477	0.190059	-0.0791958	0.193689	-0.519794	0.0225423	-0.0833623	0.734391
miR-149	up	DNAH9	down	-0.519288	0.0226972	0.0838403	0.339186	-0.109655	0.0715067	-0.519288	0.0226972	0.0169921	0.944955
miR-335	up	ABCA8	down	-0.519203	0.0227233	0.079136	0.367072	0.0915903	0.132592	-0.519203	0.0227233	-0.0915245	0.709412
miR-335	up	SFRP1	down	-0.519107	0.0227531	-0.143565	0.100536	-0.0582852	0.339137	-0.519107	0.0227531	-0.152215	0.533883
miR-203b	up	CORO1C	down	-0.51883	0.0228382	-0.0883652	0.313668	-0.111087	0.0678628	-0.51883	0.0228382	-0.25527	0.291536
miR-335	up	KCNN3	down	-0.51869	0.0228815	-0.137087	0.117013	-0.0722944	0.235556	-0.51869	0.0228815	-0.305885	0.202807
miR-4728	up	GATA6	down	-0.518538	0.0229284	-0.27621	0.00134671	-0.242226	5.59508e-05	-0.518538	0.0229284	-0.366974	0.122223
miR-767	up	VLDLR	down	-0.517902	0.0231262	0.00718141	0.934866	-0.102814	0.0911843	-0.517902	0.0231262	-0.0424583	0.862978
miR-149	up	TAGLN	down	-0.517325	0.0233063	-0.186198	0.0325467	-0.101695	0.0947795	-0.517325	0.0233063	0.14592	0.551126
miR-192	up	2018-09-10	down	-0.517145	0.023363	-0.184619	0.0340747	-0.09379	0.123502	-0.517145	0.023363	-0.124333	0.612059
miR-335	up	STAT5B	down	-0.517028	0.0233997	0.0793399	0.365835	-0.0583579	0.338534	-0.517028	0.0233997	-0.210863	0.386196
miR-4652	up	FSTL1	down	-0.516837	0.0234598	0.0129847	0.882524	-0.289964	1.19738e-06	-0.516837	0.0234598	0.128919	0.59889
miR-192	up	TBL1X	down	-0.516448	0.0235826	0.0512234	0.559693	-0.0531403	0.383551	-0.516448	0.0235826	-0.148131	0.545041
miR-192	up	TOR1AIP1	down	-0.516301	0.0236292	-0.0278609	0.751157	-0.137388	0.0236993	-0.516301	0.0236292	-0.0649183	0.791749
miR-21	up	ZNF460	down	-0.51623	0.0236517	-0.0273309	0.75574	0.0121722	0.841903	-0.51623	0.0236517	-0.0110045	0.964337
miR-335	up	CRISPLD2	down	-0.516117	0.0236876	-0.206299	0.0176325	-0.082895	0.173621	-0.516117	0.0236876	0.092217	0.707305
miR-1304	up	BHMT2	down	-0.515911	0.0237531	-0.130517	0.135791	-0.224333	0.000196496	-0.515911	0.0237531	0.0147033	0.952361
miR-455	up	MPL	down	-0.515887	0.0237608	-0.139092	0.111702	-0.0917342	0.131982	-0.515887	0.0237608	-0.174008	0.476183
miR-17	up	GATA6	down	-0.51585	0.0237724	-0.223283	0.0100675	-0.316425	1.02457e-07	-0.51585	0.0237724	-0.328438	0.169789
miR-335	up	RPS6KA5	down	-0.515752	0.0238037	-0.0307316	0.726486	-0.0353221	0.562611	-0.515752	0.0238037	0.0923168	0.707002
miR-335	up	ITPR1	down	-0.515686	0.0238247	-0.177202	0.0420878	-0.0781993	0.199373	-0.515686	0.0238247	0.269385	0.26473
miR-31	up	STK40	down	-0.515318	0.0239425	-0.515926	2.43362e-10	-0.37137	2.7467e-10	-0.515318	0.0239425	-0.355176	0.13564
miR-4724	up	HFM1	down	-0.51511	0.024009	-0.326369	0.000133913	-0.216106	0.000338965	-0.51511	0.024009	-0.272993	0.258134
miR-204	down	UNC13D	up	-0.514806	0.024107	-0.0593613	0.498965	-0.0643423	0.29124	-0.514806	0.024107	-0.538101	0.017474
miR-1301	up	MYLK	down	-0.514266	0.0242813	-0.204334	0.0187665	-0.300538	4.61537e-07	-0.514266	0.0242813	-0.440955	0.05879
miR-195	down	RS1	up	-0.514209	0.0242997	0.0650281	0.458818	0.0383713	0.52936	-0.514209	0.0242997	0.193932	0.426301
miR-20a	up	FAXC	down	-0.514117	0.0243294	0.137072	0.117052	0.0465821	0.445041	-0.514117	0.0243294	0.301071	0.210368
miR-335	up	IGSF21	down	-0.51396	0.0243806	-0.222692	0.0102726	-0.241365	5.95702e-05	-0.51396	0.0243806	0.0680165	0.782034
let-7c	down	DLX4	up	-0.513943	0.0243858	-0.0118941	0.892329	-0.134541	0.0267836	-0.513943	0.0243858	0.159422	0.514453
miR-224	up	LONRF2	down	-0.513918	0.0243941	-0.157069	0.0720813	-0.28926	1.27412e-06	-0.513918	0.0243941	-0.0102425	0.966805
miR-335	up	ITGA1	down	-0.513793	0.0244347	-0.13148	0.132902	-0.1323	0.0294477	-0.513793	0.0244347	0.0816226	0.739749
miR-17	up	RBM20	down	-0.51324	0.0246151	-0.213204	0.0141071	-0.0778133	0.201608	-0.51324	0.0246151	0.0751802	0.75969
miR-205	up	CLIP1	down	-0.513186	0.0246328	0.220426	0.0110938	0.283339	2.13415e-06	-0.513186	0.0246328	0.598248	0.0068146
miR-20a	up	PRKACB	down	-0.512918	0.0247209	-0.041637	0.63548	-0.214875	0.000367131	-0.512918	0.0247209	-0.126693	0.605266
miR-455	up	PIK3R1	down	-0.512718	0.0247867	-0.0604553	0.491073	-0.166041	0.00614779	-0.512718	0.0247867	-0.0117464	0.961934
miR-335	up	PJA2	down	-0.512481	0.0248647	-0.133998	0.125572	-0.146729	0.0156323	-0.512481	0.0248647	0.178817	0.463884
miR-149	up	CRTAP	down	-0.51248	0.024865	-0.0869465	0.321531	-0.144942	0.0169569	-0.51248	0.024865	0.282589	0.241101
miR-4728	up	CCDC80	down	-0.512397	0.0248925	-0.410747	9.98708e-07	-0.34941	3.36263e-09	-0.512397	0.0248925	-0.0512911	0.834814
miR-7156	down	PLEKHG4B	up	-0.512229	0.024948	0.318168	0.000200966	0.00993123	0.870726	-0.512229	0.024948	0.427826	0.0676619
miR-187	up	MIDN	down	-0.512173	0.0249662	0.00458249	0.958411	-0.0315812	0.604724	-0.512173	0.0249662	-0.103019	0.674718
miR-335	up	TNIK	down	-0.512138	0.0249781	-0.148796	0.088611	-0.0737159	0.22645	-0.512138	0.0249781	0.204087	0.401988
miR-335	up	AKAP13	down	-0.511982	0.0250297	-0.0930365	0.28867	-0.0748581	0.219316	-0.511982	0.0250297	-0.029778	0.90368
miR-4652	up	TNRC6C	down	-0.511902	0.0250563	0.0501228	0.56817	-0.176079	0.00363774	-0.511902	0.0250563	0.310504	0.195723
miR-203a	up	JMY	down	-0.511247	0.0252745	0.239081	0.00576495	0.114991	0.0586891	-0.511247	0.0252745	0.237703	0.327123
miR-708	up	C1orf21	down	-0.510671	0.0254674	0.0637474	0.467731	-0.0432167	0.478647	-0.510671	0.0254674	0.0431669	0.860713
miR-192	up	SGCB	down	-0.510266	0.0256038	-0.264904	0.00214342	-0.243508	5.0942e-05	-0.510266	0.0256038	-0.0762293	0.756432
miR-4728	up	C3	down	-0.509852	0.0257438	-0.149215	0.0877072	-0.202116	0.000818444	-0.509852	0.0257438	0.0157253	0.949054
miR-149	up	NFIC	down	-0.509569	0.02584	-0.246643	0.00435895	-0.201582	0.000845501	-0.509569	0.02584	-0.241673	0.318866
miR-192	up	PRKAA2	down	-0.509561	0.0258428	0.0495613	0.572518	0.115759	0.057011	-0.509561	0.0258428	-0.316379	0.186954
miR-195	down	PRSS21	up	-0.509548	0.0258473	0.117656	0.179085	0.00161852	0.978842	-0.509548	0.0258473	-0.100317	0.682818
miR-192	up	CELF2	down	-0.509465	0.0258753	-0.20177	0.0203392	-0.255234	2.11018e-05	-0.509465	0.0258753	0.216602	0.373096
miR-378a	down	BBC3	up	-0.508787	0.026107	0.0945324	0.280953	0.0451845	0.458832	-0.508787	0.026107	-0.0806798	0.742658
miR-335	up	ASB2	down	-0.508561	0.0261846	-0.247486	0.00422311	-0.253446	2.42041e-05	-0.508561	0.0261846	-0.38398	0.104584
miR-335	up	LRRK2	down	-0.508547	0.0261894	-0.153058	0.0797535	-0.183003	0.00249239	-0.508547	0.0261894	0.253937	0.294149
miR-145	down	BUB1	up	-0.508369	0.0262505	0.00515522	0.953218	-0.278879	3.12322e-06	-0.508369	0.0262505	-0.216995	0.372207
miR-642a	up	MEF2D	down	-0.508339	0.0262609	-0.105435	0.228902	-0.10608	0.0813071	-0.508339	0.0262609	-0.119493	0.626081
miR-335	up	BCHE	down	-0.508245	0.0262932	-0.188918	0.0300494	-0.10913	0.0728826	-0.508245	0.0262932	0.11489	0.639533
miR-335	up	GATA5	down	-0.508152	0.0263252	-0.224318	0.00971702	-0.0773682	0.204207	-0.508152	0.0263252	-0.351422	0.140117
miR-18a	up	NFIC	down	-0.5078	0.026447	-0.167295	0.0551959	-0.148039	0.0147192	-0.5078	0.026447	-0.368797	0.120238
miR-17	up	KLHL15	down	-0.507564	0.0265289	0.0833335	0.342124	0.0437637	0.473093	-0.507564	0.0265289	0.220952	0.363334
miR-23c	down	CENPM	up	-0.507457	0.026566	-0.130134	0.136953	-0.0962147	0.114052	-0.507457	0.026566	-0.130288	0.594981
miR-192	up	PDE2A	down	-0.507352	0.0266025	-0.265951	0.00205487	-0.109951	0.0707401	-0.507352	0.0266025	-0.104654	0.66983
miR-6499	up	JPH2	down	-0.506969	0.0267361	0.0259092	0.768076	-0.275698	4.08149e-06	-0.506969	0.0267361	-0.0318256	0.89709
miR-142	up	KCND3	down	-0.50682	0.0267882	0.0413911	0.637479	0.061485	0.31324	-0.50682	0.0267882	0.107877	0.660236
miR-195	down	CDCA4	up	-0.506719	0.0268233	-0.0517157	0.555921	-0.206613	0.000620332	-0.506719	0.0268233	-0.322228	0.178489
miR-183	up	LATS2	down	-0.506628	0.0268555	-0.391678	3.41435e-06	-0.308296	2.23767e-07	-0.506628	0.0268555	-0.313629	0.191024
miR-378a	down	FLVCR1	up	-0.506626	0.026856	0.044074	0.615809	0.163343	0.00704617	-0.506626	0.026856	0.105659	0.666834
miR-335	up	DIRAS1	down	-0.506216	0.0270001	-0.0827752	0.345379	0.0168566	0.782371	-0.506216	0.0270001	-0.119997	0.624617
miR-204	down	ZBTB8B	up	-0.505261	0.0273377	-0.0454032	0.605192	0.0433715	0.477072	-0.505261	0.0273377	0.0181275	0.941283
miR-192	up	SIRT1	down	-0.504817	0.0274959	0.0832549	0.342581	0.0729252	0.231484	-0.504817	0.0274959	0.299413	0.213014
miR-26a-2	down	IYD	up	-0.504436	0.0276323	-0.14291	0.102113	-0.0858727	0.158624	-0.504436	0.0276323	0.218828	0.368081
miR-21	up	UTRN	down	-0.504316	0.0276752	0.0644441	0.462871	0.0988128	0.104564	-0.504316	0.0276752	0.220678	0.363944
miR-4668	up	CLIP1	down	-0.504279	0.0276884	-0.204247	0.0188176	-0.0713894	0.241486	-0.504279	0.0276884	0.162057	0.507435
miR-335	up	GULP1	down	-0.504051	0.0277705	-0.146326	0.0940935	-0.111126	0.0677654	-0.504051	0.0277705	0.135957	0.578909
miR-335	up	PDE5A	down	-0.50388	0.0278321	-0.0626079	0.475741	-0.0451037	0.459637	-0.50388	0.0278321	0.11803	0.630345
miR-335	up	RNF150	down	-0.503601	0.0279327	-0.20299	0.0195772	-0.0245629	0.68728	-0.503601	0.0279327	0.22269	0.359475
miR-4728	up	TBX20	down	-0.503567	0.0279448	-0.048604	0.579967	-0.0312902	0.608059	-0.503567	0.0279448	-0.0373351	0.879389
miR-18a	up	RAB23	down	-0.503381	0.0280122	0.00752629	0.931745	-0.215126	0.000361218	-0.503381	0.0280122	-0.509285	0.0259368
miR-149	up	FSTL1	down	-0.50319	0.0280816	-0.0986515	0.260425	-0.0417583	0.493628	-0.50319	0.0280816	0.401836	0.0881195
miR-1304	up	BMPR1A	down	-0.503081	0.0281209	0.058479	0.505377	-0.155577	0.0103199	-0.503081	0.0281209	-0.349427	0.142538
miR-335	up	CORO2B	down	-0.502608	0.0282933	-0.145392	0.096235	-0.134654	0.0266549	-0.502608	0.0282933	-0.195818	0.421728
miR-17	up	RYR2	down	-0.502565	0.0283089	-0.255616	0.00309459	-0.422225	3.84393e-13	-0.502565	0.0283089	-0.0402225	0.870134
miR-204	down	MEX3A	up	-0.502419	0.0283623	-0.0886334	0.312196	0.0517431	0.396198	-0.502419	0.0283623	0.353728	0.137355
miR-335	up	OPN1SW	down	-0.502343	0.0283903	-0.177765	0.0414291	-0.0231297	0.704648	-0.502343	0.0283903	0.542658	0.0163655
miR-525	up	REEP2	down	-0.502252	0.0284237	-0.205936	0.0178375	-0.111189	0.0676083	-0.502252	0.0284237	-0.0701396	0.775394
miR-1262	down	ZNF107	up	-0.501608	0.0286604	-0.0655253	0.455383	-0.0187736	0.758348	-0.501608	0.0286604	-0.102345	0.676735
miR-7156	down	SIX1	up	-0.501397	0.0287384	0.170471	0.0506702	-0.0209678	0.731136	-0.501397	0.0287384	0.348393	0.143804
miR-335	up	PCDHB15	down	-0.501207	0.0288084	-0.0853968	0.330264	-0.00984052	0.871896	-0.501207	0.0288084	-0.187014	0.443299
miR-4728	up	RFTN2	down	-0.501201	0.0288106	0.0336566	0.701634	-0.0561137	0.357467	-0.501201	0.0288106	0.301536	0.209629
miR-6892	down	CASP2	up	-0.500468	0.029083	-0.0529736	0.546339	-0.0732079	0.229675	-0.500468	0.029083	-0.100555	0.682105
miR-877	up	USP2	down	-0.500364	0.029122	-0.0570266	0.516027	-0.094182	0.121935	-0.500364	0.029122	0.382496	0.106045
miR-642a	up	RHOB	down	-0.500248	0.0291651	-0.0216825	0.805084	-0.0860764	0.157635	-0.500248	0.0291651	0.311769	0.193813
miR-17	up	TCF4	down	-0.499942	0.0292797	-0.322078	0.000165841	-0.304048	3.33506e-07	-0.499942	0.0292797	-0.306876	0.201272
miR-192	up	CSRP1	down	-0.499811	0.029329	-0.261682	0.00243829	-0.391068	2.45928e-11	-0.499811	0.029329	-0.629121	0.00390455
miR-335	up	CLIP3	down	-0.499616	0.0294021	-0.137696	0.11538	-0.0646223	0.289141	-0.499616	0.0294021	0.0637471	0.79543
miR-192	up	CFL2	down	-0.499343	0.0295049	-0.244914	0.00465004	-0.25197	2.7084e-05	-0.499343	0.0295049	0.0612089	0.80342
miR-23b	down	SNTG1	up	-0.499328	0.0295108	-0.0640355	0.465718	0.00149325	0.980479	-0.499328	0.0295108	0.0694142	0.777661
miR-335	up	MCAM	down	-0.499281	0.0295283	-0.150969	0.084002	-0.0473304	0.437755	-0.499281	0.0295283	-0.0932493	0.704169
miR-93	up	DNAJB4	down	-0.499073	0.029607	-0.434766	1.89829e-07	-0.329095	2.89212e-08	-0.499073	0.029607	-0.284646	0.237546
miR-4728	up	KCNA5	down	-0.498324	0.0298913	0.0511164	0.560514	-0.0171179	0.779083	-0.498324	0.0298913	-0.264724	0.273404
miR-18a	up	BVES	down	-0.498199	0.029939	0.240901	0.00539392	0.0462446	0.448349	-0.498199	0.029939	0.0103505	0.966455
miR-4724	up	KY	down	-0.498161	0.0299538	-0.0550672	0.530572	-0.241383	5.94907e-05	-0.498161	0.0299538	-0.411184	0.0802997
miR-527	up	KCTD10	down	-0.4978	0.0300915	0.0623089	0.477856	-0.0794041	0.192516	-0.4978	0.0300915	0.206476	0.396382
miR-192	up	FNBP1	down	-0.497769	0.0301036	0.0230888	0.792718	-0.0924546	0.128961	-0.497769	0.0301036	0.177854	0.466335
miR-519d	up	ASB1	down	-0.497463	0.030221	-0.101517	0.246766	-0.102252	0.0929761	-0.497463	0.030221	-0.122197	0.618232
miR-192	up	IL6ST	down	-0.497222	0.0303135	-0.270686	0.00169418	-0.150808	0.012942	-0.497222	0.0303135	-0.00987325	0.968001
miR-519d	up	ITGA9	down	-0.496904	0.0304362	0.0596065	0.497191	0.0252376	0.679161	-0.496904	0.0304362	0.240693	0.320893
miR-335	up	IL6ST	down	-0.49686	0.0304532	-0.380296	6.86309e-06	-0.194784	0.00127014	-0.49686	0.0304532	-0.237489	0.327572
miR-23b	down	CDCA8	up	-0.496846	0.0304586	-0.321632	0.000169541	-0.331553	2.24739e-08	-0.496846	0.0304586	-0.50313	0.0281032
miR-6499	up	ANKRD53	down	-0.496727	0.0305047	-0.186355	0.0323979	-0.263224	1.12899e-05	-0.496727	0.0305047	-0.490623	0.0329403
miR-26a-1	down	IYD	up	-0.4967	0.0305152	-0.144493	0.0983316	-0.0849987	0.162921	-0.4967	0.0305152	0.220787	0.363702
miR-335	up	SLC2A4	down	-0.496306	0.0306681	-0.129461	0.139011	-0.0441622	0.469069	-0.496306	0.0306681	-0.223593	0.357478
miR-192	up	PCDH7	down	-0.496218	0.0307024	-0.340743	6.39e-05	-0.304115	3.31413e-07	-0.496218	0.0307024	-0.429725	0.06632
miR-335	up	GPBAR1	down	-0.49617	0.0307211	-0.202431	0.0199233	-0.119206	0.0499603	-0.49617	0.0307211	0.294821	0.220456
miR-192	up	RAB23	down	-0.496156	0.0307265	-0.181054	0.0377493	-0.225558	0.000180857	-0.496156	0.0307265	-0.219323	0.366974
miR-584	up	GNG12	down	-0.495996	0.0307887	0.0940929	0.283205	-0.172224	0.00446441	-0.495996	0.0307887	-0.0350519	0.886718
miR-23b	down	PRR11	up	-0.495802	0.0308644	-0.257573	0.00286727	-0.345932	4.91448e-09	-0.495802	0.0308644	-0.12631	0.606368
miR-17	up	EPB41L2	down	-0.495632	0.0309308	-0.202616	0.0198081	-0.183624	0.00240772	-0.495632	0.0309308	0.0822905	0.737691
miR-4668	up	FAXC	down	-0.495597	0.0309449	-0.11121	0.204265	0.0266279	0.662545	-0.495597	0.0309449	-0.106361	0.664743
miR-20a	up	RBM20	down	-0.495355	0.0310396	-0.143036	0.101808	-0.0812328	0.182439	-0.495355	0.0310396	-0.00130506	0.995769
miR-335	up	TNS1	down	-0.49517	0.0311121	-0.192701	0.0268497	-0.0740156	0.224563	-0.49517	0.0311121	-0.231458	0.340367
miR-192	up	FZD7	down	-0.495162	0.0311154	0.0135868	0.877119	-0.209832	0.000506878	-0.495162	0.0311154	-0.335834	0.159811
miR-335	up	GEM	down	-0.495001	0.031179	-0.217606	0.0121957	-0.126209	0.0378593	-0.495001	0.031179	0.132314	0.589216
miR-145	down	CCNA2	up	-0.494643	0.0313199	0.100344	0.252294	-0.26558	9.35228e-06	-0.494643	0.0313199	-0.237081	0.32843
miR-577	up	CLIC4	down	-0.494427	0.0314055	0.340857	6.35181e-05	0.136131	0.0250206	-0.494427	0.0314055	0.300367	0.211488
miR-335	up	MAOB	down	-0.494164	0.0315099	-0.280383	0.00112878	-0.150618	0.0130572	-0.494164	0.0315099	-0.340594	0.153606
miR-10b	down	CENPL	up	-0.49399	0.0315788	-0.308395	0.000321183	-0.293472	8.76439e-07	-0.49399	0.0315788	0.0310668	0.899531
miR-6499	up	BVES	down	-0.493843	0.0316373	-0.166919	0.0557533	-0.222909	0.00021625	-0.493843	0.0316373	-0.114926	0.639429
miR-642a	up	ADAM33	down	-0.493771	0.031666	-0.15476	0.0764214	-0.190716	0.00161009	-0.493771	0.031666	-0.451636	0.0522436
miR-519d	up	CYBRD1	down	-0.493421	0.031806	-0.297392	0.000534246	-0.104467	0.0860725	-0.493421	0.031806	-0.133861	0.584831
miR-301b	up	KLHL21	down	-0.49329	0.0318582	-0.204523	0.0186543	-0.183888	0.00237249	-0.49329	0.0318582	-0.241009	0.320238
miR-335	up	AOC3	down	-0.493207	0.0318915	0.00878526	0.920363	-0.00675536	0.911859	-0.493207	0.0318915	-0.0955782	0.69711
let-7c	down	CCNF	up	-0.493106	0.0319321	0.0309177	0.724896	-0.239944	6.60273e-05	-0.493106	0.0319321	-0.380027	0.10851
miR-96	up	KLHL15	down	-0.492814	0.0320493	-0.0731054	0.40482	-0.122366	0.0441508	-0.492814	0.0320493	0.189202	0.437885
miR-335	up	GNAL	down	-0.492479	0.0321842	-0.0495116	0.572904	-0.140305	0.0208614	-0.492479	0.0321842	-0.208219	0.392317
miR-455	up	FAM229B	down	-0.492472	0.0321873	-0.112465	0.199172	-0.171508	0.00463539	-0.492472	0.0321873	-0.39002	0.0987847
miR-149	up	CCDC80	down	-0.492015	0.0323722	-0.25356	0.00335082	-0.124812	0.0400532	-0.492015	0.0323722	0.219478	0.366626
miR-4728	up	CRTAP	down	-0.491933	0.0324054	-0.213866	0.0138039	-0.323853	4.9151e-08	-0.491933	0.0324054	0.00501126	0.983756
miR-335	up	COL21A1	down	-0.491861	0.0324346	-0.0338948	0.699624	-0.0257843	0.672608	-0.491861	0.0324346	-0.100242	0.683045
miR-21	up	SOX5	down	-0.491846	0.0324404	-0.17488	0.0448996	0.020893	0.732058	-0.491846	0.0324404	-0.328344	0.169919
miR-616	up	SHE	down	-0.491706	0.0324975	-0.0495161	0.572869	-0.289155	1.28591e-06	-0.491706	0.0324975	-0.0038638	0.987475
miR-335	up	GLIPR1L2	down	-0.491482	0.0325887	-0.140357	0.10845	-0.102359	0.0926333	-0.491482	0.0325887	-0.306675	0.201583
miR-335	up	APBB1	down	-0.491327	0.0326519	-0.191224	0.0280628	-0.0712655	0.242306	-0.491327	0.0326519	0.0720866	0.769317
miR-335	up	GSG1L	down	-0.491148	0.0327252	0.0567732	0.517896	-0.142212	0.0191704	-0.491148	0.0327252	0.139678	0.568463
miR-1304	up	DIRAS1	down	-0.491135	0.0327304	-0.000759714	0.993102	-0.0489826	0.421911	-0.491135	0.0327304	-0.136124	0.578438
miR-577	up	FGF2	down	-0.491048	0.0327658	0.142965	0.101978	-0.0123084	0.840157	-0.491048	0.0327658	0.121278	0.620895
miR-335	up	NBEA	down	-0.490918	0.0328192	0.132717	0.129262	-0.128536	0.0344326	-0.490918	0.0328192	-0.0666019	0.786466
miR-33a	up	TGFBR2	down	-0.490852	0.0328462	-0.257966	0.00282344	-0.394485	1.59143e-11	-0.490852	0.0328462	0.100902	0.681063
miR-335	up	FAM149A	down	-0.490543	0.032973	0.0526212	0.549015	-0.0393605	0.518791	-0.490543	0.032973	-0.148707	0.543462
miR-31	up	PDE4D	down	-0.490038	0.0331813	-0.050515	0.565142	-0.0290017	0.634558	-0.490038	0.0331813	0.322821	0.177646
miR-3074	up	CREBRF	down	-0.490029	0.0331849	-0.137071	0.117054	-0.259894	1.46878e-05	-0.490029	0.0331849	-0.119699	0.625481
miR-335	up	SLC2A13	down	-0.489639	0.0333467	-0.201857	0.0202842	-0.185667	0.00214725	-0.489639	0.0333467	0.119181	0.62699
miR-4668	up	KCNB1	down	-0.489574	0.0333734	-0.0873727	0.319155	-0.0680253	0.264442	-0.489574	0.0333734	-0.00691325	0.977592
miR-20a	up	FYCO1	down	-0.489346	0.0334682	-0.367712	1.44139e-05	-0.376295	1.52511e-10	-0.489346	0.0334682	-0.492453	0.0321947
miR-671	up	ENTPD1	down	-0.489302	0.0334868	-0.250976	0.00369982	-0.376811	1.43309e-10	-0.489302	0.0334868	-0.420608	0.0729462
miR-651	up	UNC5C	down	-0.489253	0.033507	-0.275935	0.00136235	-0.211369	0.0004598	-0.489253	0.033507	-0.113754	0.64287
miR-335	up	CCDC69	down	-0.489252	0.0335074	-0.162638	0.062431	-0.11875	0.0508499	-0.489252	0.0335074	-0.540458	0.0168935
miR-577	up	SDC2	down	-0.488934	0.0336402	0.021418	0.807415	0.0022974	0.96997	-0.488934	0.0336402	0.00414394	0.986567
miR-19a	up	MBNL3	down	-0.488906	0.0336518	-0.157871	0.0706206	-0.245605	4.36489e-05	-0.488906	0.0336518	-0.112562	0.646378
miR-1262	down	DSN1	up	-0.488876	0.0336643	0.0781385	0.373161	-0.0189892	0.75566	-0.488876	0.0336643	0.107118	0.66249
miR-6499	up	THRA	down	-0.488872	0.0336661	-0.0870856	0.320754	-0.19768	0.00106967	-0.488872	0.0336661	-0.0193303	0.937394
miR-1301	up	MBNL1	down	-0.488671	0.0337503	-0.19296	0.0266412	-0.152316	0.0120556	-0.488671	0.0337503	-0.196294	0.420577
miR-942	up	GPR146	down	-0.488505	0.0338195	-0.162421	0.0627855	-0.264508	1.01915e-05	-0.488505	0.0338195	-0.512735	0.0247809
miR-149	up	PLEKHO1	down	-0.488401	0.0338636	-0.363065	1.88109e-05	-0.29266	9.42448e-07	-0.488401	0.0338636	0.0409982	0.86765
miR-203a	up	FYCO1	down	-0.488185	0.0339542	-0.00233264	0.978823	0.0295229	0.628481	-0.488185	0.0339542	0.530632	0.0194189
miR-335	up	ATP1B2	down	-0.48813	0.0339774	-0.00307355	0.972098	0.0207277	0.734098	-0.48813	0.0339774	-0.0766302	0.755188
miR-23c	down	HAPLN1	up	-0.487646	0.0341814	-0.0577971	0.510363	-0.0898669	0.140066	-0.487646	0.0341814	-0.272317	0.259363
let-7c	down	SLC5A6	up	-0.487344	0.0343096	0.119242	0.173253	0.0499638	0.412662	-0.487344	0.0343096	-0.0276645	0.910489
miR-4668	up	PPM1K	down	-0.487207	0.0343677	-0.0779347	0.374413	0.14875	0.0142436	-0.487207	0.0343677	0.0696219	0.777011
miR-455	up	SSBP2	down	-0.486965	0.0344704	-0.0469143	0.593223	-0.147042	0.0154094	-0.486965	0.0344704	-0.145444	0.55244
miR-942	up	NUDT7	down	-0.486818	0.0345334	-0.0912118	0.298272	-0.0604821	0.321213	-0.486818	0.0345334	-0.123098	0.615624
miR-335	up	PYGM	down	-0.486462	0.0346854	-0.16128	0.0646816	-0.0289352	0.635335	-0.486462	0.0346854	-0.199961	0.411774
miR-17	up	MEF2D	down	-0.486387	0.0347173	-0.139524	0.110582	-0.244567	4.71252e-05	-0.486387	0.0347173	-0.303966	0.205798
let-7c	down	EN2	up	-0.486385	0.0347183	0.0154205	0.860692	-0.0520738	0.393183	-0.486385	0.0347183	-0.278026	0.249109
miR-34c	up	CPEB3	down	-0.486232	0.0347839	0.200153	0.021389	0.0515481	0.397983	-0.486232	0.0347839	0.138026	0.573091
miR-1262	down	MELK	up	-0.486215	0.0347909	0.0828288	0.345066	-0.0857529	0.159208	-0.486215	0.0347909	-0.161189	0.509743
miR-3074	up	TNRC6C	down	-0.485977	0.0348931	0.0574808	0.512683	0.0401093	0.510862	-0.485977	0.0348931	0.392161	0.0967862
miR-335	up	MEF2A	down	-0.48587	0.0349393	-0.207927	0.0167391	-0.121921	0.0449332	-0.48587	0.0349393	-0.10088	0.681129
miR-7156	down	CDCA4	up	-0.485194	0.0352309	0.315893	0.000224467	0.0528899	0.385799	-0.485194	0.0352309	-0.227088	0.349814
miR-4668	up	SETBP1	down	-0.485176	0.0352386	-0.271299	0.00165193	-0.00686544	0.910428	-0.485176	0.0352386	0.201518	0.408067
miR-145	down	MYRF	up	-0.484959	0.0353328	-0.208565	0.0163998	-0.10573	0.0823242	-0.484959	0.0353328	0.214238	0.378461
miR-519d	up	DPYSL2	down	-0.484435	0.0355609	-0.0650273	0.458823	-0.0340586	0.576676	-0.484435	0.0355609	0.401913	0.0880532
miR-577	up	CTGF	down	-0.484198	0.0356644	-0.0770696	0.379755	-0.115846	0.0568223	-0.484198	0.0356644	-0.202604	0.405492
miR-335	up	ATP2B4	down	-0.483981	0.0357592	-0.158412	0.0696502	-0.0993217	0.102781	-0.483981	0.0357592	-0.209676	0.388938
miR-195	down	CCNE1	up	-0.483685	0.035889	0.048681	0.579366	-0.0772123	0.205122	-0.483685	0.035889	-0.320616	0.180796
miR-4652	up	GLIPR1L2	down	-0.483629	0.0359138	-0.0960712	0.27316	-0.0956915	0.116041	-0.483629	0.0359138	0.0825021	0.737039
miR-93	up	SCN7A	down	-0.483549	0.035949	-0.349502	3.99807e-05	-0.24197	5.70035e-05	-0.483549	0.035949	-0.357623	0.132776
miR-335	up	GABARAPL1	down	-0.482876	0.0362458	-0.0995288	0.256189	-0.112765	0.0637848	-0.482876	0.0362458	0.00489647	0.984128
miR-192	up	PTBP2	down	-0.482811	0.0362744	-0.0478622	0.585769	-0.102406	0.0924811	-0.482811	0.0362744	-0.13383	0.584918
miR-4728	up	FERMT2	down	-0.482761	0.0362968	-0.366151	1.57691e-05	-0.319925	7.26619e-08	-0.482761	0.0362968	-0.221261	0.362645
miR-4728	up	SSBP2	down	-0.482171	0.036559	-0.121667	0.164612	-0.22757	0.000157675	-0.482171	0.036559	-0.462778	0.0460204
miR-942	up	ATXN1	down	-0.482031	0.0366213	0.0956435	0.275312	-0.166619	0.0059694	-0.482031	0.0366213	-0.0698548	0.776284
miR-4724	up	ABCD2	down	-0.481609	0.0368101	-0.232803	0.00722521	-0.222584	0.000221018	-0.481609	0.0368101	0.348829	0.143269
miR-149	up	NFIX	down	-0.481471	0.0368719	-0.319998	0.000183747	-0.248406	3.54379e-05	-0.481471	0.0368719	-0.119671	0.625564
miR-4728	up	SMTNL2	down	-0.481315	0.0369417	0.193666	0.0260811	0.201912	0.000828681	-0.481315	0.0369417	0.166863	0.49475
miR-335	up	GALNT16	down	-0.48126	0.0369663	-0.084085	0.337773	-0.122984	0.0430832	-0.48126	0.0369663	0.111781	0.648682
miR-203a	up	IGFBP5	down	-0.480852	0.0371501	0.00950561	0.913857	-0.136233	0.024911	-0.480852	0.0371501	-0.40031	0.089447
miR-17	up	TNFSF12	down	-0.480657	0.0372381	-0.230548	0.0078251	-0.287501	1.48689e-06	-0.480657	0.0372381	-0.129122	0.598309
miR-455	up	SCN3B	down	-0.480245	0.0374247	-0.0829379	0.344429	-0.0784552	0.197903	-0.480245	0.0374247	-0.0662132	0.787685
miR-455	up	DUSP19	down	-0.480215	0.0374386	-0.13682	0.117733	-0.294422	8.04789e-07	-0.480215	0.0374386	-0.55475	0.013694
miR-525	up	GLP2R	down	-0.479935	0.0375655	0.0527239	0.548234	0.0142205	0.815739	-0.479935	0.0375655	0.0392015	0.873405
miR-525	up	GNG12	down	-0.479833	0.037612	0.0190951	0.82796	-0.218275	0.000294156	-0.479833	0.037612	-0.460194	0.0474104
miR-3074	up	RBM20	down	-0.479774	0.037639	0.148831	0.0885353	-0.0626582	0.304078	-0.479774	0.037639	0.592825	0.00747306
miR-17	up	TCEAL1	down	-0.479722	0.0376626	-0.111088	0.204763	-0.263957	1.06501e-05	-0.479722	0.0376626	0.0125151	0.959445
miR-149	up	MYADM	down	-0.479716	0.0376652	-0.192945	0.0266538	-0.0926909	0.127982	-0.479716	0.0376652	0.145111	0.553358
miR-23b	down	ITPR3	up	-0.479196	0.0379029	0.0148827	0.865504	-0.173704	0.00412876	-0.479196	0.0379029	0.401338	0.0885512
miR-335	up	SLC45A1	down	-0.479183	0.0379089	0.164515	0.0594264	0.0280807	0.645358	-0.479183	0.0379089	0.0764111	0.755868
miR-335	up	CPNE6	down	-0.479156	0.0379217	0.00363371	0.967016	0.0405331	0.506404	-0.479156	0.0379217	0.194806	0.424177
miR-4668	up	AK4	down	-0.478644	0.0381565	-0.133374	0.127361	0.122112	0.0445951	-0.478644	0.0381565	-0.0900738	0.713832
miR-17	up	ZNF454	down	-0.478527	0.0382105	-0.213991	0.0137476	-0.167893	0.00559208	-0.478527	0.0382105	-0.00386633	0.987467
miR-335	up	DMPK	down	-0.478473	0.0382353	0.159668	0.0674364	-0.067087	0.271103	-0.478473	0.0382353	0.230335	0.342779
miR-17	up	HSPB2	down	-0.478217	0.0383535	-0.324586	0.000146415	-0.319049	7.92201e-08	-0.478217	0.0383535	-0.122158	0.618344
miR-141	up	PTPRD	down	-0.478196	0.0383632	-0.348094	4.31515e-05	-0.403888	4.68104e-12	-0.478196	0.0383632	-0.557238	0.0131904
miR-139	down	SYT7	up	-0.478127	0.0383955	0.0795409	0.364618	-0.0446299	0.46437	-0.478127	0.0383955	-0.175396	0.472618
miR-18a	up	PCDH9	down	-0.478086	0.0384144	0.267309	0.00194492	-0.0642061	0.292264	-0.478086	0.0384144	0.251887	0.298197
miR-93	up	C1orf21	down	-0.477794	0.0385498	-0.0487225	0.579042	-0.076896	0.20699	-0.477794	0.0385498	-0.39916	0.0904571
miR-335	up	PCDHGC3	down	-0.477738	0.0385755	-0.112458	0.1992	-0.113813	0.0613421	-0.477738	0.0385755	-0.197731	0.417115
miR-204	down	BID	up	-0.477107	0.0388695	-0.238273	0.00593672	-0.116097	0.0562853	-0.477107	0.0388695	-0.298353	0.214718
miR-942	up	WASF3	down	-0.476357	0.0392212	-0.0836579	0.340242	-0.228163	0.000151395	-0.476357	0.0392212	-0.0930234	0.704855
miR-335	up	PBXIP1	down	-0.47585	0.0394603	-0.00249067	0.977388	-0.00627923	0.918048	-0.47585	0.0394603	-0.300333	0.211542
miR-335	up	P2RX1	down	-0.475761	0.0395025	-0.282797	0.00101792	-0.13471	0.0265908	-0.475761	0.0395025	-0.401021	0.0888271
miR-425	up	ACACB	down	-0.475726	0.0395188	0.0762335	0.384961	-0.256649	1.89166e-05	-0.475726	0.0395188	-0.30158	0.20956
miR-31	up	KLHL15	down	-0.475547	0.0396035	0.104928	0.231162	0.0850179	0.162826	-0.475547	0.0396035	0.208921	0.390688
miR-4728	up	CAMK2A	down	-0.475261	0.0397392	-0.372585	1.08535e-05	-0.346556	4.59281e-09	-0.475261	0.0397392	-0.264189	0.274412
miR-383	down	CHAC1	up	-0.474729	0.0399929	-0.154795	0.0763547	-0.035229	0.563642	-0.474729	0.0399929	-0.192447	0.42992
miR-6507	down	SMUG1	up	-0.474712	0.0400007	-0.207682	0.0168709	-0.203598	0.000747519	-0.474712	0.0400007	0.0653942	0.790255
miR-20a	up	CCSER2	down	-0.474701	0.040006	-0.318829	0.000194581	-0.345672	5.05471e-09	-0.474701	0.040006	-0.461214	0.0468582
let-7c	down	RAB3IP	up	-0.474487	0.0401085	0.0248964	0.7769	-0.0738254	0.225759	-0.474487	0.0401085	0.218523	0.368767
miR-4724	up	RASSF8	down	-0.474221	0.0402359	-0.374202	9.86845e-06	-0.189387	0.00173803	-0.474221	0.0402359	-0.184278	0.450115
miR-27b	down	HIST1H1C	up	-0.474067	0.0403099	-0.106779	0.22299	-0.0152038	0.80325	-0.474067	0.0403099	0.122575	0.617137
miR-335	up	HIPK3	down	-0.473949	0.0403668	-0.266294	0.00202657	-0.0944884	0.12072	-0.473949	0.0403668	0.125027	0.610057
miR-93	up	KATNAL1	down	-0.473791	0.0404428	-0.311767	0.000273708	-0.320357	6.96216e-08	-0.473791	0.0404428	-0.0576308	0.814716
miR-224	up	MOAP1	down	-0.472863	0.0408916	-0.279299	0.00118208	-0.111841	0.0660036	-0.472863	0.0408916	-0.0749561	0.760386
miR-335	up	HECTD2	down	-0.472203	0.0412129	0.0379609	0.665636	0.0031744	0.958516	-0.472203	0.0412129	0.484257	0.0356383
miR-525	up	JPH2	down	-0.472081	0.0412727	0.00262496	0.976169	0.0504362	0.408252	-0.472081	0.0412727	-0.176345	0.470186
miR-4728	up	NFIC	down	-0.472059	0.0412835	-0.138417	0.113468	-0.228506	0.000147865	-0.472059	0.0412835	-0.0225086	0.927125
miR-335	up	SLC2A12	down	-0.471618	0.0414995	-0.0456683	0.603085	-0.169366	0.00518272	-0.471618	0.0414995	0.0638565	0.795086
miR-335	up	RFX2	down	-0.471431	0.0415916	0.0871892	0.320177	0.0996623	0.1016	-0.471431	0.0415916	0.471531	0.0415423
miR-335	up	OTOGL	down	-0.471059	0.0417751	0.0157188	0.858025	0.0485199	0.426314	-0.471059	0.0417751	0.299172	0.2134
miR-195	down	VAV2	up	-0.471015	0.041797	0.0287865	0.743174	-0.0912154	0.134191	-0.471015	0.041797	-0.0843968	0.73121
miR-17	up	ELMSAN1	down	-0.47093	0.0418388	-0.0398042	0.650444	0.0116148	0.849053	-0.47093	0.0418388	-0.0853221	0.728369
miR-17	up	CYBRD1	down	-0.47072	0.041943	-0.141019	0.106778	-0.342708	6.95708e-09	-0.47072	0.041943	-0.670534	0.00167806
miR-4724	up	KLHL15	down	-0.470347	0.042128	-0.253932	0.00330315	-0.119897	0.0486391	-0.470347	0.042128	-0.236665	0.329304
miR-4668	up	DPP6	down	-0.470154	0.0422239	-0.0252273	0.774014	0.0134249	0.825878	-0.470154	0.0422239	-0.141191	0.564238
miR-192	up	MSRB3	down	-0.469556	0.0425225	-0.39546	2.69191e-06	-0.334005	1.74383e-08	-0.469556	0.0425225	-0.300016	0.212048
miR-4728	up	GLP2R	down	-0.469497	0.042552	-0.159029	0.068555	-0.15791	0.00921778	-0.469497	0.042552	-0.0464999	0.85007
miR-19a	up	FYCO1	down	-0.469324	0.0426387	-0.423689	4.14796e-07	-0.409477	2.22065e-12	-0.469324	0.0426387	-0.601582	0.0064339
miR-4728	up	KCNK3	down	-0.469186	0.042708	-0.117536	0.17953	-0.0255135	0.675851	-0.469186	0.042708	0.137285	0.575173
miR-324	up	MYC	down	-0.469067	0.0427676	-0.218214	0.0119504	-0.122754	0.043478	-0.469067	0.0427676	0.0793182	0.746864
miR-455	up	RUNX1T1	down	-0.468712	0.0429467	-0.138387	0.113548	-0.252458	2.60985e-05	-0.468712	0.0429467	-0.363321	0.126272
miR-335	up	ZMAT1	down	-0.468631	0.0429871	-0.0476532	0.587409	-0.101936	0.0939945	-0.468631	0.0429871	0.215602	0.37536
miR-767	up	TRPS1	down	-0.468519	0.043044	0.0122384	0.889231	0.0232374	0.703338	-0.468519	0.043044	-0.0399157	0.871116
miR-135b	up	AMOTL2	down	-0.468371	0.0431186	-0.047267	0.590444	0.136483	0.0246444	-0.468371	0.0431186	0.661568	0.00203618
miR-17	up	IGFBP5	down	-0.46835	0.0431293	-0.227608	0.0086728	-0.344122	5.97669e-09	-0.46835	0.0431293	-0.330939	0.16637
miR-149	up	TES	down	-0.468315	0.043147	0.165526	0.0578582	-0.00645489	0.915764	-0.468315	0.043147	0.0495333	0.840405
miR-204	down	ZWILCH	up	-0.468247	0.0431815	-0.163399	0.0611985	-0.194428	0.00129697	-0.468247	0.0431815	0.0241576	0.921801
miR-21	up	BTG2	down	-0.468064	0.0432742	-0.280955	0.00110155	-0.245706	4.3325e-05	-0.468064	0.0432742	-0.27544	0.253721
miR-21	up	MAT2A	down	-0.467962	0.0433261	-0.0515618	0.557099	-0.128229	0.0348683	-0.467962	0.0433261	0.285333	0.236366
miR-6499	up	CRISPLD2	down	-0.46761	0.0435052	-0.0947662	0.279759	-0.30703	2.52195e-07	-0.46761	0.0435052	-0.114024	0.642077
miR-17	up	SEMA3E	down	-0.467535	0.0435436	-0.259649	0.00264264	-0.284035	2.00976e-06	-0.467535	0.0435436	0.0354871	0.88532
miR-1304	up	TNS1	down	-0.467319	0.0436533	-0.158699	0.06914	-0.152101	0.0121783	-0.467319	0.0436533	-0.100488	0.682304
miR-335	up	LTBP4	down	-0.467156	0.0437371	0.0344168	0.695225	0.02785	0.648075	-0.467156	0.0437371	-0.131635	0.591146
miR-4728	up	ITGB3	down	-0.467078	0.0437766	-0.284519	0.000945063	-0.197815	0.00106108	-0.467078	0.0437766	0.345373	0.147546
miR-335	up	PPARGC1A	down	-0.46707	0.0437811	-0.0965411	0.27081	-0.138157	0.0229205	-0.46707	0.0437811	-0.251861	0.298249
miR-192	up	RASSF8	down	-0.467026	0.0438034	-0.158098	0.070213	-0.0996213	0.101742	-0.467026	0.0438034	0.224071	0.356426
miR-4652	up	WASF3	down	-0.466969	0.0438328	0.0296508	0.735743	-0.144486	0.0173104	-0.466969	0.0438328	0.00487865	0.984186
miR-149	up	SMTNL2	down	-0.466778	0.0439308	0.0581049	0.508109	0.0806867	0.185406	-0.466778	0.0439308	0.254985	0.292093
miR-6854	up	JADE1	down	-0.466701	0.0439699	-0.349199	4.06456e-05	-0.278259	3.29153e-06	-0.466701	0.0439699	-0.377406	0.11117
miR-20a	up	TMEM100	down	-0.466543	0.0440514	-0.173886	0.0461504	-0.31727	9.43379e-08	-0.466543	0.0440514	-0.540454	0.0168945
miR-18a	up	ATP2B4	down	-0.466354	0.0441486	-0.161075	0.065027	-0.215492	0.000352749	-0.466354	0.0441486	-0.227204	0.349563
miR-21	up	NEK1	down	-0.466265	0.0441944	-0.0245363	0.780044	-0.00238926	0.96877	-0.466265	0.0441944	0.0560712	0.81965
miR-18a	up	FAXC	down	-0.466219	0.0442181	0.198219	0.022705	0.0574361	0.346231	-0.466219	0.0442181	0.242968	0.3162
miR-335	up	PGM5	down	-0.465742	0.0444648	-0.149427	0.0872519	-0.0560919	0.357654	-0.465742	0.0444648	-0.224042	0.35649
miR-335	up	LCA5	down	-0.464952	0.0448752	-0.0599349	0.494819	0.131313	0.0306908	-0.464952	0.0448752	0.350797	0.140871
miR-29a	down	COL10A1	up	-0.464946	0.0448786	0.476347	7.77498e-09	0.405228	3.91943e-12	-0.464946	0.0448786	0.429035	0.0668052
miR-20a	up	RGS5	down	-0.464879	0.0449133	-0.244511	0.00472042	-0.301997	4.03459e-07	-0.464879	0.0449133	-0.279756	0.246054
miR-20a	up	SLC16A7	down	-0.4644	0.0451641	-0.0890619	0.309853	-0.181409	0.00272225	-0.4644	0.0451641	-0.087824	0.720703
miR-425	up	GATA6	down	-0.464309	0.0452121	-0.262994	0.00231409	-0.344395	5.80302e-09	-0.464309	0.0452121	-0.232038	0.339122
miR-335	up	KLHL5	down	-0.464256	0.0452398	-0.372897	1.06565e-05	-0.262205	1.22411e-05	-0.464256	0.0452398	-0.420781	0.0728162
miR-20a	up	COL19A1	down	-0.464042	0.0453519	-0.321416	0.000171353	-0.0809029	0.184227	-0.464042	0.0453519	0.0389084	0.874344
miR-335	up	PLSCR4	down	-0.463746	0.0455079	-0.291786	0.000687136	-0.201133	0.000868917	-0.463746	0.0455079	-0.228901	0.345877
miR-4668	up	AMOTL2	down	-0.463465	0.0456566	-0.0575328	0.512302	0.0706099	0.246677	-0.463465	0.0456566	0.262195	0.278185
miR-93	up	CNKSR3	down	-0.463416	0.0456823	-0.160649	0.0657481	-0.0248068	0.684341	-0.463416	0.0456823	0.218806	0.368132
miR-182	up	PITPNM3	down	-0.463299	0.0457439	-0.165123	0.0584802	0.0780344	0.200326	-0.463299	0.0457439	-0.48309	0.0361512
miR-200c	up	LPAR1	down	-0.46308	0.0458603	-0.171322	0.049511	-0.113379	0.062344	-0.46308	0.0458603	0.0881374	0.719745
miR-335	up	FGF10	down	-0.462893	0.0459594	-0.0912576	0.298028	-0.0816163	0.180376	-0.462893	0.0459594	-0.0158444	0.948668
miR-143	down	CENPM	up	-0.462265	0.0462937	0.0834138	0.341657	-0.222999	0.000214943	-0.462265	0.0462937	-0.401875	0.0880863
miR-651	up	SETBP1	down	-0.461924	0.0464767	-0.241667	0.0052443	-0.142549	0.0188842	-0.461924	0.0464767	-0.38073	0.107803
miR-192	up	CNKSR3	down	-0.461821	0.0465316	-0.0591709	0.500345	0.00083895	0.989032	-0.461821	0.0465316	0.112898	0.645389
miR-335	up	MS4A2	down	-0.461717	0.0465874	-0.148841	0.0885139	-0.0775953	0.202878	-0.461717	0.0465874	-0.10477	0.669483
miR-183	up	AKAP12	down	-0.461608	0.0466461	-0.17893	0.0400928	-0.165436	0.00634	-0.461608	0.0466461	-0.0645285	0.792974
miR-192	up	EML1	down	-0.46144	0.0467365	-0.069736	0.426874	-0.0698407	0.251875	-0.46144	0.0467365	-0.00513413	0.983357
miR-195	down	CASKIN1	up	-0.461391	0.0467628	-0.173079	0.0471866	-0.118865	0.0506238	-0.461391	0.0467628	-0.370027	0.118911
miR-6499	up	ERC1	down	-0.461281	0.0468218	0.0453088	0.605943	0.0919872	0.130914	-0.461281	0.0468218	0.24715	0.30768
miR-149	up	KLHL21	down	-0.461224	0.0468525	-0.0958129	0.274459	-0.150442	0.0131654	-0.461224	0.0468525	-0.41451	0.0776445
miR-335	up	POPDC2	down	-0.461124	0.0469068	-0.23882	0.00581997	-0.0937456	0.123681	-0.461124	0.0469068	-0.299733	0.212502
miR-205	up	MGLL	down	-0.460755	0.0471058	-0.246604	0.00436543	-0.274302	4.58532e-06	-0.460755	0.0471058	-0.120627	0.622784
miR-1301	up	CORO1C	down	-0.460332	0.0473355	-0.186277	0.032471	-0.0686044	0.260387	-0.460332	0.0473355	-0.0725735	0.7678
miR-200c	up	PTPRD	down	-0.460234	0.0473888	-0.334497	8.85273e-05	-0.368623	3.79676e-10	-0.460234	0.0473888	-0.608257	0.00572369
miR-205	up	ITM2A	down	-0.460077	0.0474743	-0.402956	1.66553e-06	-0.456712	2.27207e-15	-0.460077	0.0474743	-0.473425	0.0406192
miR-519d	up	ZNF454	down	-0.459795	0.0476278	0.120424	0.169003	0.10247	0.092278	-0.459795	0.0476278	0.433628	0.0636255
miR-21	up	APOLD1	down	-0.459693	0.0476835	-0.0713709	0.416087	-0.145824	0.016291	-0.459693	0.0476835	-0.276612	0.251623
miR-940	up	SYT15	down	-0.459623	0.0477219	-0.292141	0.00067638	-0.0854644	0.160621	-0.459623	0.0477219	-0.418808	0.0743103
miR-4668	up	RNF38	down	-0.459561	0.0477559	0.118771	0.174972	-0.0270629	0.65738	-0.459561	0.0477559	0.0805516	0.743053
let-7c	down	RAB11FIP4	up	-0.459066	0.0480273	-0.211319	0.0150026	-0.210847	0.000475296	-0.459066	0.0480273	-0.072543	0.767895
miR-192	up	ZC3H12C	down	-0.459019	0.0480532	-0.0590592	0.501156	0.0151837	0.803504	-0.459019	0.0480532	0.252511	0.296963
miR-17	up	MLXIP	down	-0.458833	0.0481555	-0.133114	0.12811	-0.12278	0.0434336	-0.458833	0.0481555	-0.247663	0.306644
miR-335	up	PITPNM2	down	-0.4587	0.0482287	0.0394393	0.65344	-0.10652	0.0800456	-0.4587	0.0482287	-0.0934773	0.703477
miR-616	up	NRXN1	down	-0.458654	0.0482539	-0.0247033	0.778586	-0.225668	0.000179508	-0.458654	0.0482539	0.252507	0.29697
miR-192	up	PPP1R12A	down	-0.458654	0.0482539	-0.100313	0.252444	-0.179792	0.00297491	-0.458654	0.0482539	0.0724358	0.768229
miR-335	up	HMGCLL1	down	-0.4585	0.0483389	0.0866969	0.322927	-0.0126865	0.835316	-0.4585	0.0483389	0.107285	0.661993
miR-4728	up	PGM2L1	down	-0.458341	0.0484269	-0.193564	0.0261618	-0.244563	4.71396e-05	-0.458341	0.0484269	-0.336619	0.158776
miR-4668	up	SLC8A1	down	-0.458279	0.0484612	0.00259361	0.976454	-0.00907638	0.881768	-0.458279	0.0484612	0.361708	0.128089
miR-877	up	DNAJB4	down	-0.458159	0.0485276	-0.207611	0.0169098	-0.195116	0.00124552	-0.458159	0.0485276	-0.364477	0.124981
miR-7156	down	LMNB1	up	-0.4577	0.0487823	0.250284	0.00379877	-0.0828764	0.173719	-0.4577	0.0487823	0.141731	0.562736
miR-20a	up	FAM129A	down	-0.457574	0.0488525	-0.362963	1.89209e-05	-0.325493	4.16838e-08	-0.457574	0.0488525	-0.118515	0.628929
miR-4668	up	PTGIS	down	-0.457325	0.048991	0.0300673	0.732171	0.0775345	0.203233	-0.457325	0.048991	-0.0971793	0.69227
miR-455	up	ATXN1	down	-0.457253	0.0490314	0.338726	7.10474e-05	0.228108	0.000151963	-0.457253	0.0490314	0.275243	0.254075
miR-20a	up	PRKG1	down	-0.457183	0.0490707	-0.37826	7.75461e-06	-0.353977	2.02858e-09	-0.457183	0.0490707	-0.25401	0.294006
miR-149	up	SERINC1	down	-0.456864	0.0492487	0.0279707	0.750208	-0.00085036	0.988883	-0.456864	0.0492487	0.00883135	0.971376
miR-335	up	SCN1B	down	-0.456777	0.0492974	-0.241521	0.00527236	-0.189204	0.00175641	-0.456777	0.0492974	-0.00366555	0.988118
miR-335	up	CEND1	down	-0.456703	0.0493393	-0.0121329	0.890181	-0.0903314	0.13802	-0.456703	0.0493393	0.213551	0.38003
miR-32	up	KLHL15	down	-0.456043	0.0497105	-0.010279	0.906879	0.0650394	0.286033	-0.456043	0.0497105	-0.351245	0.14033
miR-429	up	PTPRD	down	-0.455772	0.0498632	-0.29864	0.000504781	-0.285717	1.7373e-06	-0.455772	0.0498632	-0.580848	0.00911124
miR-203a	up	SERINC1	down	-0.4556	0.0499607	-0.101059	0.248912	0.0469475	0.441475	-0.4556	0.0499607	0.298923	0.213799

## Sheet: BRCA
miRNA	miRNA regulated status	Target gene	Gene regulate status	r_hc	p_hc	r_early	p_early	r_advanced	p_advanced	r_normal	p_normal	r_tumor	p_tumor
miR-200a	up	HHIP	down	-0.799241	2.73893e-24	-0.0852368	0.0167685	0.0433125	0.475222	-0.799241	2.73893e-24	0.0248361	0.803345
miR-200b	up	HHIP	down	-0.79836	3.34292e-24	-0.0801054	0.0246222	0.0199601	0.742216	-0.79836	3.34292e-24	0.0524568	0.598719
miR-200a	up	QKI	down	-0.760646	7.45967e-21	-0.306814	1.28769e-18	-0.193816	0.00126331	-0.760646	7.45967e-21	-0.187267	0.0582044
miR-200b	up	FERMT2	down	-0.759	1.01105e-20	-0.301718	5.00537e-18	-0.275039	3.813e-06	-0.759	1.01105e-20	-0.213569	0.030304
miR-200a	up	ZEB2	down	-0.753573	2.70748e-20	-0.293209	4.55163e-17	-0.23329	9.70316e-05	-0.753573	2.70748e-20	-0.188869	0.0560488
miR-429	up	ZEB2	down	-0.753524	2.73128e-20	-0.345376	1.81999e-23	-0.300316	4.06672e-07	-0.753524	2.73128e-20	-0.205724	0.0370922
miR-378a	down	E2F5	up	-0.752753	3.13492e-20	0.0115715	0.74585	-0.0540053	0.373192	-0.752753	3.13492e-20	-0.0502423	0.614262
miR-200b	up	QKI	down	-0.750183	4.94516e-20	-0.347197	1.03159e-23	-0.243838	4.51267e-05	-0.750183	4.94516e-20	-0.234469	0.0171308
miR-141	up	EIF4EBP2	down	-0.750029	5.08137e-20	0.0162445	0.649094	0.182896	0.00237119	-0.750029	5.08137e-20	0.159798	0.106883
miR-141	up	ZEB2	down	-0.749858	5.23667e-20	-0.450634	1.27559e-40	-0.393946	1.31695e-11	-0.749858	5.23667e-20	-0.481787	2.57162e-07
miR-429	up	QKI	down	-0.747404	8.04659e-20	-0.299773	8.34463e-18	-0.237442	7.20796e-05	-0.747404	8.04659e-20	-0.156543	0.114314
miR-200a	up	METTL7A	down	-0.747078	8.51575e-20	-0.0349251	0.327821	-0.0346148	0.56832	-0.747078	8.51575e-20	-0.161237	0.103723
miR-200b	up	ZEB2	down	-0.743502	1.57702e-19	-0.346369	1.33615e-23	-0.27289	4.56642e-06	-0.743502	1.57702e-19	-0.312832	0.00129402
miR-200a	up	ZEB1	down	-0.742612	1.83535e-19	-0.207778	4.00569e-09	-0.158951	0.00839258	-0.742612	1.83535e-19	-0.207968	0.0350317
miR-200c	up	QKI	down	-0.739705	3.00005e-19	-0.346836	1.15509e-23	-0.360446	7.89436e-10	-0.739705	3.00005e-19	-0.366937	0.000137604
miR-141	up	QKI	down	-0.738135	3.90173e-19	-0.334175	5.50718e-22	-0.362186	6.45558e-10	-0.738135	3.90173e-19	-0.341344	0.000417793
miR-141	up	ZEB1	down	-0.732795	9.40225e-19	-0.37713	5.28758e-28	-0.219086	0.000257751	-0.732795	9.40225e-19	-0.438236	3.66148e-06
miR-200a	up	ZFPM2	down	-0.732428	9.98103e-19	-0.20732	4.33926e-09	-0.171235	0.004476	-0.732428	9.98103e-19	-0.209102	0.0340278
miR-429	up	ZFPM2	down	-0.730923	1.27341e-18	-0.280703	1.02289e-15	-0.235496	8.29132e-05	-0.730923	1.27341e-18	-0.173671	0.0793589
miR-429	up	ZEB1	down	-0.729047	1.72161e-18	-0.30808	9.1508e-19	-0.278846	2.75975e-06	-0.729047	1.72161e-18	-0.21527	0.0289801
miR-200b	up	ZEB1	down	-0.728686	1.82392e-18	-0.260166	1.21585e-13	-0.198799	0.000937137	-0.728686	1.82392e-18	-0.275812	0.00480324
miR-429	up	AVPR1A	down	-0.723821	3.93602e-18	-0.241449	6.66993e-12	-0.0683712	0.259366	-0.723821	3.93602e-18	-0.131048	0.187018
miR-141	up	ZFPM2	down	-0.723048	4.44112e-18	-0.361676	9.88774e-26	-0.20363	0.00069673	-0.723048	4.44112e-18	-0.382271	6.75584e-05
miR-203a	up	ASPA	down	-0.722633	4.73777e-18	-0.113321	0.00145121	-0.0955469	0.114574	-0.722633	4.73777e-18	-0.143886	0.147053
miR-203a	up	ZEB1	down	-0.720841	6.25396e-18	-0.0244546	0.493312	0.00993714	0.869935	-0.720841	6.25396e-18	-0.128138	0.197082
miR-203a	up	DMRT2	down	-0.716786	1.16335e-17	0.125018	0.00043908	0.166788	0.0056466	-0.716786	1.16335e-17	-0.0950773	0.339416
miR-200c	up	ZEB2	down	-0.715839	1.34263e-17	-0.421598	2.93073e-35	-0.3657	4.28346e-10	-0.715839	1.34263e-17	-0.470358	5.35172e-07
miR-200b	up	AVPR1A	down	-0.714903	1.54625e-17	-0.255488	3.41167e-13	-0.0850861	0.160159	-0.714903	1.54625e-17	-0.245708	0.0123596
miR-200b	up	METTL7A	down	-0.712726	2.14237e-17	0.021604	0.545062	0.00401826	0.94721	-0.712726	2.14237e-17	-0.0896482	0.367832
miR-200b	up	ZFPM2	down	-0.712216	2.3113e-17	-0.25133	8.38892e-13	-0.224678	0.000176733	-0.712216	2.3113e-17	-0.292877	0.00268018
miR-203a	up	CAV1	down	-0.711429	2.59791e-17	-0.0439323	0.218289	0.074632	0.218155	-0.711429	2.59791e-17	-0.0483781	0.62748
miR-200c	up	ZEB1	down	-0.711175	2.69756e-17	-0.34508	1.99543e-23	-0.1781	0.00309354	-0.711175	2.69756e-17	-0.402828	2.45893e-05
miR-200b	up	ACSL4	down	-0.710418	3.01736e-17	-0.328123	3.2823e-21	-0.235901	8.05371e-05	-0.710418	3.01736e-17	-0.189466	0.0552625
miR-203a	up	FOXN3	down	-0.710275	3.08174e-17	0.11077	0.00185736	0.227344	0.000147146	-0.710275	3.08174e-17	0.11669	0.240462
miR-203a	up	ZEB2	down	-0.705384	6.29593e-17	-0.0771871	0.0303756	0.0187054	0.757899	-0.705384	6.29593e-17	-0.0690694	0.488152
miR-429	up	ACSL4	down	-0.70156	1.08955e-16	-0.29297	4.83826e-17	-0.207352	0.000551908	-0.70156	1.08955e-16	-0.111018	0.264244
miR-203a	up	CELF2	down	-0.699457	1.46767e-16	-0.0482037	0.176721	0.147533	0.0145121	-0.699457	1.46767e-16	-0.142436	0.151216
miR-200c	up	AVPR1A	down	-0.699373	1.485e-16	-0.298306	1.22381e-17	-0.233568	9.51337e-05	-0.699373	1.485e-16	-0.346405	0.000337895
miR-200a	up	WASF3	down	-0.694189	3.061e-16	-0.20857	3.48576e-09	-0.157455	0.00903464	-0.694189	3.061e-16	-0.117822	0.235899
miR-200c	up	ACSL4	down	-0.693176	3.51942e-16	-0.32516	7.75074e-21	-0.363105	5.8017e-10	-0.693176	3.51942e-16	-0.292501	0.00271584
miR-200c	up	ZFPM2	down	-0.687499	7.61427e-16	-0.343215	3.55258e-23	-0.210341	0.000456353	-0.687499	7.61427e-16	-0.426807	6.93217e-06
miR-378a	down	GALNT7	up	-0.686945	8.20172e-16	-0.271974	8.19481e-15	-0.171679	0.00437214	-0.686945	8.20172e-16	-0.0553652	0.578577
miR-203a	up	KIAA0408	down	-0.684059	1.20503e-15	-0.0309425	0.38601	-0.0244094	0.687493	-0.684059	1.20503e-15	-0.194707	0.0487415
miR-200b	up	KDR	down	-0.683513	1.2953e-15	-0.165028	3.25224e-06	-0.12909	0.0326795	-0.683513	1.2953e-15	-0.125756	0.205605
miR-200c	up	KDR	down	-0.682486	1.48332e-15	-0.172245	1.16934e-06	-0.162128	0.00716133	-0.682486	1.48332e-15	-0.127107	0.200741
miR-200c	up	CFL2	down	-0.68065	1.88749e-15	-0.274388	4.64426e-15	-0.176507	0.00337439	-0.68065	1.88749e-15	-0.104223	0.294777
miR-452	down	LEF1	up	-0.68059	1.90238e-15	-0.125766	0.000405274	-0.0674228	0.266048	-0.68059	1.90238e-15	-0.172262	0.0818658
miR-378a	down	GALNT6	up	-0.676836	3.09643e-15	-0.258444	1.78199e-13	-0.128936	0.0328894	-0.676836	3.09643e-15	0.0264189	0.791089
miR-429	up	WASF3	down	-0.675432	3.70846e-15	-0.181327	3.03476e-07	-0.131075	0.0300733	-0.675432	3.70846e-15	-0.0109924	0.912249
miR-378a	down	MANEAL	up	-0.671696	5.96469e-15	-0.111993	0.00165116	-0.135458	0.0249408	-0.671696	5.96469e-15	-0.136883	0.16797
miR-203a	up	ESR2	down	-0.670059	7.32937e-15	-0.00021793	0.99513	0.123132	0.0416872	-0.670059	7.32937e-15	0.0814546	0.413388
miR-141	up	WASF3	down	-0.667564	1.0008e-14	-0.179162	4.21159e-07	-0.200716	0.000833802	-0.667564	1.0008e-14	0.121328	0.222148
miR-200b	up	WASF3	down	-0.66488	1.39461e-14	-0.192025	5.66623e-08	-0.181829	0.00251715	-0.66488	1.39461e-14	-0.00835079	0.93328
miR-141	up	TMEM132C	down	-0.662655	1.83148e-14	-0.301345	5.52176e-18	-0.21339	0.00037491	-0.662655	1.83148e-14	-0.33166	0.000620926
miR-378a	down	SPIRE2	up	-0.660222	2.46084e-14	0.0625591	0.0794424	-0.058573	0.334068	-0.660222	2.46084e-14	0.0321326	0.747291
miR-141	up	ADRB1	down	-0.65677	3.72436e-14	-0.0331593	0.352882	-0.182422	0.00243513	-0.65677	3.72436e-14	0.0813736	0.413855
miR-203a	up	MXRA7	down	-0.655224	4.47575e-14	0.0196677	0.581686	-0.000147223	0.998065	-0.655224	4.47575e-14	0.146689	0.139255
miR-378a	down	FLVCR1	up	-0.654802	4.70527e-14	-0.202639	9.73382e-09	-0.177963	0.00311675	-0.654802	4.70527e-14	-0.184393	0.0622421
miR-375	up	TTC7B	down	-0.652882	5.90129e-14	-0.141124	7.10799e-05	-0.138627	0.0217167	-0.652882	5.90129e-14	-0.244191	0.0129269
miR-335	down	NUP210	up	-0.64449	1.55846e-13	0.0485268	0.173834	0.075096	0.215298	-0.64449	1.55846e-13	0.085306	0.391578
miR-342	up	LMX1A	down	-0.640576	2.42645e-13	0.0459923	0.197441	0.0055833	0.9267	-0.640576	2.42645e-13	0.090741	0.361999
miR-203a	up	SHMT1	down	-0.639279	2.80596e-13	0.00776923	0.827732	-0.140836	0.0196888	-0.639279	2.80596e-13	0.056209	0.572793
miR-21	up	EIF4EBP2	down	-0.639056	2.87679e-13	-0.249204	1.32055e-12	-0.237732	7.0585e-05	-0.639056	2.87679e-13	-0.242858	0.0134441
miR-375	up	CELF2	down	-0.636888	3.66109e-13	-0.289797	1.08063e-16	-0.185907	0.00200005	-0.636888	3.66109e-13	-0.199287	0.0435758
miR-342	up	FRMD3	down	-0.635313	4.35695e-13	-0.229231	7.64789e-11	-0.145636	0.015841	-0.635313	4.35695e-13	-0.115727	0.244389
miR-141	up	C10orf10	down	-0.634874	4.57267e-13	-0.259478	1.417e-13	-0.407021	2.33985e-12	-0.634874	4.57267e-13	-0.367198	0.000135987
miR-342	up	RRAGD	down	-0.633904	5.08664e-13	-0.37023	5.66042e-27	-0.223904	0.000186317	-0.633904	5.08664e-13	-0.144855	0.144321
miR-4732	down	ILDR1	up	-0.631831	6.37892e-13	-0.0536941	0.132324	0.00166329	0.978136	-0.631831	6.37892e-13	-0.141805	0.153054
miR-139	down	SYT7	up	-0.621994	1.82543e-12	0.0107716	0.762874	-0.0743377	0.21998	-0.621994	1.82543e-12	0.0627027	0.529208
miR-335	down	SLC37A1	up	-0.621212	1.98146e-12	0.0223554	0.531164	-0.0408075	0.501153	-0.621212	1.98146e-12	0.00598372	0.952166
miR-375	up	EIF4EBP2	down	-0.620214	2.19917e-12	-0.0592575	0.0966734	0.0284963	0.638615	-0.620214	2.19917e-12	0.129728	0.191535
miR-200a	up	DLC1	down	-0.619358	2.40439e-12	-0.149354	2.58932e-05	-0.150107	0.0128659	-0.619358	2.40439e-12	-0.235225	0.0167659
miR-375	up	ACSL4	down	-0.615437	3.60532e-12	-0.393014	1.80766e-30	-0.288635	1.17544e-06	-0.615437	3.60532e-12	-0.245669	0.012374
miR-335	down	PFKFB4	up	-0.613086	4.58392e-12	-0.00676096	0.849803	-0.146441	0.0152647	-0.613086	4.58392e-12	0.0107801	0.913937
miR-378a	down	B4GALNT3	up	-0.612306	4.96211e-12	-0.0380391	0.286504	-0.0745952	0.218382	-0.612306	4.96211e-12	0.115337	0.245995
miR-378a	down	ZNF239	up	-0.611558	5.35286e-12	-0.264867	4.22222e-14	-0.330753	2.04036e-08	-0.611558	5.35286e-12	-0.251812	0.0102903
miR-21	up	FAXDC2	down	-0.611162	5.57173e-12	-0.0379432	0.287722	-0.077085	0.203357	-0.611162	5.57173e-12	-0.0435275	0.662422
miR-200a	up	COBLL1	down	-0.61044	5.99306e-12	-0.0542914	0.128067	-0.0938227	0.121295	-0.61044	5.99306e-12	0.0656777	0.509811
miR-342	up	NPR1	down	-0.610402	6.01593e-12	-0.0791674	0.0263591	-0.175675	0.00353005	-0.610402	6.01593e-12	-0.00158418	0.987329
miR-203a	up	DLC1	down	-0.60808	7.59466e-12	-0.013	0.71576	-0.082161	0.175073	-0.60808	7.59466e-12	-0.195779	0.0474885
miR-21	up	PPM1L	down	-0.607978	7.67259e-12	-0.313046	2.35945e-19	-0.190788	0.00150946	-0.607978	7.67259e-12	-0.292176	0.00274705
miR-215	down	TRAIP	up	-0.60597	9.37156e-12	-0.0884584	0.0130466	0.0146039	0.809829	-0.60597	9.37156e-12	0.0238678	0.810865
miR-21	up	SGCB	down	-0.605436	9.88133e-12	-0.111866	0.00167162	-0.151022	0.0123214	-0.605436	9.88133e-12	-0.201063	0.0416997
miR-200b	up	DLC1	down	-0.602282	1.3482e-11	-0.173439	9.83096e-07	-0.160432	0.00779696	-0.602282	1.3482e-11	-0.273183	0.00523855
miR-203b	up	TCN2	down	-0.601977	1.38907e-11	0.0048465	0.892022	0.0257173	0.671696	-0.601977	1.38907e-11	0.127092	0.200793
miR-335	down	MARCKSL1	up	-0.600502	1.60414e-11	0.0417095	0.242506	-0.0284573	0.639074	-0.600502	1.60414e-11	-0.096533	0.332039
miR-342	up	FAM180B	down	-0.600382	1.62304e-11	-0.12941	0.000272703	-0.0313074	0.605863	-0.600382	1.62304e-11	-0.0846806	0.395072
miR-200b	up	COBLL1	down	-0.598233	1.99908e-11	-0.131846	0.00020802	-0.124768	0.0390272	-0.598233	1.99908e-11	0.00935099	0.925311
miR-21	up	FOXN3	down	-0.595182	2.68027e-11	0.0856105	0.0162936	0.15372	0.0108327	-0.595182	2.68027e-11	0.153673	0.121191
miR-335	down	SERINC2	up	-0.59514	2.69116e-11	-0.0105886	0.766784	-0.0997842	0.0992937	-0.59514	2.69116e-11	-0.08142	0.413588
miR-183	up	FOXN2	down	-0.59505	2.71447e-11	-0.143654	5.24161e-05	-0.11489	0.0575159	-0.59505	2.71447e-11	-0.160702	0.10489
miR-21	up	SOX5	down	-0.592754	3.37733e-11	-0.0860462	0.015755	0.0668404	0.270209	-0.592754	3.37733e-11	0.0668523	0.502254
miR-365a	down	TONSL	up	-0.590164	4.31295e-11	-0.116074	0.00110568	0.102394	0.0907169	-0.590164	4.31295e-11	-0.0834992	0.401723
miR-378a	down	WNT7B	up	-0.589928	4.40961e-11	-0.0749224	0.0356014	-0.117625	0.0517882	-0.589928	4.40961e-11	-0.103564	0.29786
miR-365b	down	TONSL	up	-0.5897	4.50476e-11	-0.113509	0.00142479	0.103317	0.0878294	-0.5897	4.50476e-11	-0.0817256	0.411831
miR-203a	up	CADM2	down	-0.586962	5.81769e-11	-0.147894	3.10991e-05	-0.0678806	0.262808	-0.586962	5.81769e-11	-0.180129	0.0686485
miR-3065	up	TGFBR2	down	-0.586854	5.87596e-11	-0.190679	7.03574e-08	-0.165436	0.0060536	-0.586854	5.87596e-11	-0.246866	0.0119412
miR-429	up	CDC14B	down	-0.586699	5.96145e-11	-0.276076	3.11129e-15	-0.222034	0.000211499	-0.586699	5.96145e-11	-0.167599	0.0906124
miR-342	up	RFTN2	down	-0.586281	6.19692e-11	-0.0274284	0.442259	-0.0957085	0.113959	-0.586281	6.19692e-11	-0.0215713	0.828771
miR-215	down	RFC4	up	-0.585128	6.89513e-11	-0.0291748	0.41374	-0.00237959	0.968724	-0.585128	6.89513e-11	0.0289969	0.771238
miR-215	down	KIF24	up	-0.583553	7.97193e-11	0.0434687	0.223191	0.0468744	0.439649	-0.583553	7.97193e-11	-0.130763	0.187984
miR-141	up	PPARA	down	-0.582063	9.13871e-11	-0.130005	0.000255355	-0.157923	0.00882938	-0.582063	9.13871e-11	-0.0135867	0.891653
miR-335	down	HMGA1	up	-0.581702	9.44479e-11	-0.094513	0.00797445	-0.0131026	0.829062	-0.581702	9.44479e-11	-0.160358	0.105645
miR-342	up	ANTXR2	down	-0.580653	1.03922e-10	-0.12024	0.000724708	-0.286415	1.43047e-06	-0.580653	1.03922e-10	-0.123301	0.214667
miR-342	up	PPM1L	down	-0.579705	1.13271e-10	-0.20257	9.84812e-09	-0.148187	0.0140774	-0.579705	1.13271e-10	-0.228927	0.0200194
miR-200c	up	DLC1	down	-0.57968	1.13526e-10	-0.267505	2.31076e-14	-0.199514	0.000897293	-0.57968	1.13526e-10	-0.261499	0.00762756
miR-375	up	RHOQ	down	-0.578088	1.31112e-10	-0.281169	9.13598e-16	-0.254801	1.96267e-05	-0.578088	1.31112e-10	-0.0902117	0.364817
miR-365a	down	STXBP2	up	-0.57799	1.32271e-10	0.164724	3.39236e-06	0.200013	0.000870428	-0.57799	1.32271e-10	0.0214531	0.829695
miR-365b	down	STXBP2	up	-0.577572	1.37353e-10	0.16282	4.40969e-06	0.201865	0.000777033	-0.577572	1.37353e-10	0.0198427	0.842307
miR-3065	up	DMRT2	down	-0.575619	1.63665e-10	-0.0396374	0.266725	0.000490391	0.993553	-0.575619	1.63665e-10	-0.0655733	0.510485
miR-3065	up	TYRO3	down	-0.57555	1.64681e-10	-0.0567015	0.111964	0.086841	0.151683	-0.57555	1.64681e-10	0.0252597	0.80006
miR-375	up	FZD4	down	-0.575066	1.71959e-10	0.224205	2.00605e-10	0.143535	0.0174354	-0.575066	1.71959e-10	0.258114	0.00847919
miR-375	up	FAM89A	down	-0.574971	1.73414e-10	-0.367513	1.4176e-26	-0.34716	3.52816e-09	-0.574971	1.73414e-10	-0.189861	0.0547479
miR-135b	up	DNAJB4	down	-0.574875	1.74911e-10	0.148475	2.89194e-05	0.205922	0.00060389	-0.574875	1.74911e-10	0.0760558	0.445125
miR-200a	up	KLF11	down	-0.573888	1.9099e-10	-0.0818964	0.0215794	-0.0874483	0.14883	-0.573888	1.9099e-10	-0.0612272	0.538964
miR-335	down	DNAAF3	up	-0.573828	1.92e-10	0.10502	0.00318114	0.074383	0.219698	-0.573828	1.92e-10	0.0852827	0.391708
miR-215	down	TRIM59	up	-0.573618	1.95628e-10	0.0138422	0.698221	0.0395395	0.514557	-0.573618	1.95628e-10	0.0655335	0.510742
miR-378a	down	ABRACL	up	-0.573086	2.05086e-10	0.290578	8.87655e-17	0.318338	7.20006e-08	-0.573086	2.05086e-10	0.273655	0.0051579
miR-3065	up	ANTXR2	down	-0.572809	2.10173e-10	-0.171907	1.22793e-06	-0.161379	0.00743636	-0.572809	2.10173e-10	-0.0941206	0.34432
miR-375	up	SH3D19	down	-0.572658	2.13018e-10	0.0458274	0.199054	0.0337056	0.578529	-0.572658	2.13018e-10	0.0833122	0.402782
miR-21	up	FERMT2	down	-0.572236	2.21111e-10	0.152665	1.69869e-05	0.188242	0.00174963	-0.572236	2.21111e-10	0.110364	0.267085
miR-200c	up	ZC3H12C	down	-0.571149	2.43393e-10	-0.110009	0.00199737	-0.262506	1.0684e-05	-0.571149	2.43393e-10	-0.0684943	0.49179
miR-215	down	2018-09-03	up	-0.570916	2.48435e-10	0.0300069	0.400544	-0.0569372	0.347766	-0.570916	2.48435e-10	0.143512	0.148118
miR-203b	up	CXorf36	down	-0.570365	2.60781e-10	-0.063234	0.0762465	-0.0292519	0.629739	-0.570365	2.60781e-10	-0.00955653	0.923674
miR-342	up	AIFM2	down	-0.567907	3.23378e-10	-0.106071	0.00288859	-0.0463612	0.444678	-0.567907	3.23378e-10	-0.0360915	0.7174
miR-3065	up	ITGA1	down	-0.567772	3.27191e-10	-0.145781	4.04105e-05	-0.143509	0.0174562	-0.567772	3.27191e-10	-0.0247803	0.803778
miR-3065	up	WASF3	down	-0.56754	3.33871e-10	-0.112184	0.00162097	-0.140161	0.0202897	-0.56754	3.33871e-10	-0.0631393	0.526338
miR-375	up	TNS1	down	-0.567371	3.38825e-10	-0.0512765	0.150676	-0.00575371	0.924469	-0.567371	3.38825e-10	0.140952	0.155563
miR-429	up	ANKRD33B	down	-0.566725	3.58382e-10	-0.232115	4.35308e-11	-0.252803	2.29075e-05	-0.566725	3.58382e-10	-0.1508	0.128388
miR-135b	up	SLC19A3	down	-0.566582	3.62854e-10	0.0496655	0.163942	0.0416303	0.492555	-0.566582	3.62854e-10	0.0589359	0.554287
miR-375	up	CFL2	down	-0.56637	3.6959e-10	-0.187787	1.11447e-07	-0.234631	8.82019e-05	-0.56637	3.6959e-10	-0.165227	0.095337
miR-378a	down	C20orf144	up	-0.566124	3.77574e-10	-0.0145074	0.684479	-0.138274	0.0220564	-0.566124	3.77574e-10	-0.0915239	0.357854
miR-200b	up	ANKRD33B	down	-0.565008	4.15814e-10	-0.215726	9.69227e-10	-0.240672	5.69927e-05	-0.565008	4.15814e-10	-0.247098	0.011859
miR-135b	up	TXNIP	down	-0.562078	5.34852e-10	-0.211754	1.98333e-09	-0.0467875	0.440497	-0.562078	5.34852e-10	-0.102495	0.302901
miR-335	down	HPDL	up	-0.559141	6.8668e-10	-0.0341726	0.338357	0.0356398	0.556913	-0.559141	6.8668e-10	-0.0977008	0.326196
miR-21	up	PPARA	down	-0.558977	6.96246e-10	-0.231451	4.95981e-11	-0.167877	0.00533716	-0.558977	6.96246e-10	-0.187645	0.0576902
miR-429	up	KLF11	down	-0.556507	8.57385e-10	-0.0975476	0.00616757	-0.0965472	0.11081	-0.556507	8.57385e-10	-0.0314305	0.752633
miR-183	up	EIF4EBP2	down	-0.555222	9.54748e-10	0.0378939	0.288349	0.109926	0.0692495	-0.555222	9.54748e-10	0.108467	0.275448
miR-190b	up	CYGB	down	-0.554887	9.81869e-10	-0.0179074	0.615944	-0.148638	0.0137838	-0.554887	9.81869e-10	0.174783	0.0774262
miR-365a	down	RAB11FIP4	up	-0.554697	9.97546e-10	0.191373	6.29449e-08	0.091721	0.129897	-0.554697	9.97546e-10	0.218732	0.0264357
miR-21	up	FOXN2	down	-0.554562	1.00891e-09	-0.125261	0.000427797	-0.138688	0.0216583	-0.554562	1.00891e-09	-0.113003	0.255746
miR-200c	up	ANKRD33B	down	-0.554318	1.0296e-09	-0.132422	0.000194981	-0.19869	0.000943318	-0.554318	1.0296e-09	-0.433176	4.87117e-06
miR-215	down	PSRC1	up	-0.554067	1.05136e-09	-0.0629954	0.0773642	-0.0566083	0.350563	-0.554067	1.05136e-09	0.0255608	0.797728
miR-365b	down	RAB11FIP4	up	-0.553844	1.07102e-09	0.195596	3.16665e-08	0.0963591	0.111511	-0.553844	1.07102e-09	0.229797	0.0195403
miR-215	down	TRIB3	up	-0.551763	1.27271e-09	0.0135607	0.704065	-0.0301125	0.619693	-0.551763	1.27271e-09	0.100422	0.312835
miR-200b	up	CDC14B	down	-0.551623	1.28755e-09	-0.227286	1.11369e-10	-0.142741	0.0180735	-0.551623	1.28755e-09	-0.0804683	0.419085
miR-342	up	ZC3H12C	down	-0.551622	1.28764e-09	-0.34166	5.72987e-23	-0.247577	3.41165e-05	-0.551622	1.28764e-09	-0.215124	0.0290913
miR-139	down	HIST1H2BN	up	-0.551069	1.34774e-09	-0.108383	0.00232933	-0.0369326	0.542687	-0.551069	1.34774e-09	-0.156528	0.114349
miR-4732	down	HID1	up	-0.549327	1.55518e-09	-0.0630214	0.077242	0.0594637	0.326756	-0.549327	1.55518e-09	0.0755746	0.448018
miR-21	up	CPM	down	-0.546791	1.91286e-09	-0.0529182	0.138015	-0.0874605	0.148773	-0.546791	1.91286e-09	-0.0851499	0.392449
miR-21	up	MYCBP2	down	-0.545778	2.07677e-09	0.00398273	0.911178	0.00669741	0.912127	-0.545778	2.07677e-09	0.0292549	0.769259
miR-335	down	TJP3	up	-0.545714	2.08756e-09	0.0546346	0.125671	-0.0934179	0.122916	-0.545714	2.08756e-09	0.166452	0.0928735
miR-183	up	TXNIP	down	-0.544824	2.24336e-09	-0.185192	1.67366e-07	-0.132166	0.0287171	-0.544824	2.24336e-09	-0.158641	0.109479
miR-335	down	ILDR1	up	-0.543909	2.41524e-09	0.0852508	0.0167505	-0.0597411	0.324501	-0.543909	2.41524e-09	-0.00746686	0.940329
miR-141	up	KLF11	down	-0.543882	2.42047e-09	-0.0584022	0.101593	-0.173723	0.00392097	-0.543882	2.42047e-09	0.00867107	0.930728
miR-21	up	CLIP4	down	-0.543332	2.52987e-09	-0.0217956	0.541502	-0.0138438	0.819554	-0.543332	2.52987e-09	-0.00154265	0.987661
miR-200c	up	FBLN5	down	-0.543244	2.54785e-09	-0.184593	1.83684e-07	-0.25345	2.17926e-05	-0.543244	2.54785e-09	-0.21665	0.0279418
miR-335	down	CRB3	up	-0.543132	2.57085e-09	0.0109031	0.760067	-0.0719471	0.235215	-0.543132	2.57085e-09	-0.0493187	0.620796
miR-335	down	RAB26	up	-0.542116	2.78916e-09	0.046763	0.190027	-0.0175811	0.772037	-0.542116	2.78916e-09	0.104496	0.293509
miR-155	up	PCCA	down	-0.540809	3.09612e-09	-0.160335	6.18171e-06	-0.0654955	0.279988	-0.540809	3.09612e-09	-0.153497	0.121623
miR-183	up	SH3D19	down	-0.540011	3.299e-09	-0.11388	0.00137389	-0.144667	0.0165598	-0.540011	3.299e-09	-0.0573943	0.564714
miR-378a	down	CHTF18	up	-0.537949	3.88441e-09	0.0853649	0.0166043	0.00890736	0.883312	-0.537949	3.88441e-09	-0.0501816	0.61469
miR-203a	up	PEAR1	down	-0.537771	3.93958e-09	-0.0521444	0.143877	-0.0687953	0.256415	-0.537771	3.93958e-09	-0.107998	0.27754
miR-200c	up	CDC14B	down	-0.537494	4.02641e-09	-0.254161	4.5543e-13	-0.276263	3.43822e-06	-0.537494	4.02641e-09	-0.102453	0.303103
miR-551b	down	SLC7A5	up	-0.536954	4.20154e-09	-0.0121904	0.732763	-0.00712929	0.906485	-0.536954	4.20154e-09	0.1078	0.278428
miR-342	up	FIGN	down	-0.536693	4.28876e-09	-0.159206	7.1948e-06	-0.173175	0.00403761	-0.536693	4.28876e-09	-0.14847	0.134464
miR-193a	down	NUP210	up	-0.535338	4.76966e-09	-0.0593972	0.0958884	-0.0432316	0.476049	-0.535338	4.76966e-09	-0.20853	0.0345312
miR-21	up	FIGN	down	-0.535182	4.82826e-09	-0.103881	0.00352865	-0.0960955	0.112498	-0.535182	4.82826e-09	-0.071047	0.475753
miR-342	up	PLXNA4	down	-0.535053	4.87752e-09	-0.143924	5.07219e-05	-0.144509	0.0166796	-0.535053	4.87752e-09	-0.108879	0.273616
miR-335	down	PPFIA4	up	-0.533652	5.44092e-09	-0.021853	0.540436	-0.00533066	0.930007	-0.533652	5.44092e-09	-0.119709	0.228425
miR-203a	up	FMNL2	down	-0.532243	6.07048e-09	-0.00741664	0.835436	0.0753321	0.213855	-0.532243	6.07048e-09	0.0118604	0.90535
miR-335	down	HSD17B7	up	-0.53176	6.30155e-09	-0.0340617	0.339928	-0.157683	0.00893401	-0.53176	6.30155e-09	-0.0756139	0.447781
miR-21	up	EPM2A	down	-0.530855	6.75815e-09	-0.232944	3.69695e-11	-0.10275	0.0895946	-0.530855	6.75815e-09	-0.189148	0.055681
miR-3065	up	ENPP2	down	-0.530555	6.9162e-09	-0.176756	6.03559e-07	-0.0654323	0.280453	-0.530555	6.9162e-09	-0.136536	0.169061
miR-200c	up	KLF11	down	-0.528517	8.08861e-09	-0.0563441	0.114246	-0.198709	0.000942287	-0.528517	8.08861e-09	-0.0882919	0.375153
miR-3065	up	FFAR4	down	-0.528287	8.23243e-09	-0.0763399	0.0322479	-0.181478	0.00256691	-0.528287	8.23243e-09	-0.0455559	0.647716
miR-200b	up	KLF11	down	-0.527643	8.64802e-09	-0.116228	0.00108883	-0.110142	0.0687015	-0.527643	8.64802e-09	-0.0236513	0.812549
miR-203b	up	CNKSR2	down	-0.527338	8.85185e-09	0.116905	0.00101746	0.198413	0.000959322	-0.527338	8.85185e-09	-0.0792035	0.426458
miR-203b	up	SLC19A3	down	-0.52733	8.8568e-09	0.0378993	0.288281	0.0571818	0.345695	-0.52733	8.8568e-09	0.0152441	0.878531
miR-144	down	RAB39B	up	-0.526936	9.12724e-09	0.115372	0.00118574	0.116051	0.0550244	-0.526936	9.12724e-09	0.12629	0.203673
miR-215	down	ORC1	up	-0.526531	9.41267e-09	0.0483758	0.175179	0.0585036	0.334641	-0.526531	9.41267e-09	0.13006	0.190391
miR-215	down	MAD2L1	up	-0.526519	9.42111e-09	0.0282011	0.429504	0.0162043	0.789454	-0.526519	9.42111e-09	0.104653	0.292778
miR-183	up	NR3C1	down	-0.525545	1.01447e-08	-0.258352	1.81852e-13	-0.275135	3.78223e-06	-0.525545	1.01447e-08	-0.259711	0.00806742
miR-378a	down	SORD	up	-0.524646	1.08595e-08	-0.155522	1.17212e-05	-0.192284	0.0013828	-0.524646	1.08595e-08	-0.0806949	0.417772
miR-183	up	FOXO1	down	-0.524599	1.08988e-08	-0.270973	1.03531e-14	-0.198114	0.000976828	-0.524599	1.08988e-08	-0.255477	0.00919991
miR-335	down	E2F5	up	-0.524024	1.13824e-08	0.0509885	0.152986	0.0206025	0.734226	-0.524024	1.13824e-08	0.0299087	0.764251
miR-139	down	KCNQ5	up	-0.523854	1.15289e-08	-0.121873	0.00061186	-0.0102132	0.866355	-0.523854	1.15289e-08	-0.152738	0.123498
miR-3065	up	IGF1	down	-0.523435	1.18991e-08	-0.105322	0.00309459	-0.0443074	0.465131	-0.523435	1.18991e-08	-0.0412426	0.679141
miR-3065	up	EIF4EBP2	down	-0.523159	1.21486e-08	-0.103579	0.00362643	-0.0876672	0.147812	-0.523159	1.21486e-08	0.05268	0.597162
miR-335	down	MUC5B	up	-0.521869	1.33851e-08	-0.114476	0.00129563	-0.135746	0.0246318	-0.521869	1.33851e-08	-0.0829742	0.4047
miR-21	up	PRICKLE2	down	-0.52168	1.35757e-08	0.214744	1.15849e-09	0.185298	0.00207057	-0.52168	1.35757e-08	0.32764	0.000729202
miR-335	down	PODXL2	up	-0.521645	1.36118e-08	0.0441766	0.215737	0.075431	0.213253	-0.521645	1.36118e-08	-0.0644891	0.517516
miR-21	up	COBLL1	down	-0.521505	1.37551e-08	0.047262	0.185338	0.0474836	0.43372	-0.521505	1.37551e-08	0.10841	0.275701
miR-21	up	TGFBR3	down	-0.521352	1.39134e-08	-0.155243	1.21576e-05	-0.0449495	0.458682	-0.521352	1.39134e-08	-0.148813	0.133556
miR-4732	down	ENTPD7	up	-0.520146	1.52244e-08	-0.0507791	0.154682	-0.0435977	0.472318	-0.520146	1.52244e-08	0.0441731	0.657728
miR-335	down	CALML5	up	-0.51973	1.57036e-08	-0.199129	1.76158e-08	-0.202493	0.000747505	-0.51973	1.57036e-08	-0.246296	0.0121456
miR-21	up	DMD	down	-0.518706	1.69457e-08	-0.148627	2.83716e-05	0.0205873	0.734415	-0.518706	1.69457e-08	-0.292906	0.00267738
miR-215	down	STIL	up	-0.518244	1.75352e-08	0.0973887	0.00625215	0.085814	0.156601	-0.518244	1.75352e-08	0.127086	0.200814
miR-335	down	SQLE	up	-0.517316	1.87819e-08	0.00889649	0.803217	-0.111572	0.06516	-0.517316	1.87819e-08	0.0589709	0.554051
miR-21	up	GPAM	down	-0.51623	2.03468e-08	-0.0333045	0.350778	-0.0193617	0.749683	-0.51623	2.03468e-08	-0.0293035	0.768887
miR-375	up	SAMD4A	down	-0.516221	2.03608e-08	-0.251079	8.85385e-13	-0.169419	0.00492467	-0.516221	2.03608e-08	-0.243605	0.0131522
miR-18a	up	STAC2	down	-0.516107	2.05323e-08	0.24148	6.62851e-12	0.145191	0.0161674	-0.516107	2.05323e-08	0.160896	0.104464
miR-335	down	GALNT5	up	-0.515528	2.14249e-08	-0.1216	0.000629461	-0.0629543	0.299109	-0.515528	2.14249e-08	-0.0410133	0.680828
miR-342	up	TACC1	down	-0.515284	2.18116e-08	-0.103328	0.0037094	-0.101484	0.0936376	-0.515284	2.18116e-08	-0.175261	0.0766064
miR-3065	up	RETSAT	down	-0.514427	2.32265e-08	0.0382963	0.283257	0.0204425	0.736214	-0.514427	2.32265e-08	0.271627	0.00551253
miR-335	down	CA14	up	-0.513522	2.48126e-08	0.0273152	0.444145	-0.0716256	0.237319	-0.513522	2.48126e-08	0.0594782	0.550641
miR-3065	up	PPP1R16B	down	-0.51309	2.56072e-08	-0.209944	2.73603e-09	-0.141193	0.0193768	-0.51309	2.56072e-08	-0.233161	0.017778
miR-335	down	GPR37L1	up	-0.512877	2.60086e-08	-0.0277378	0.437126	-0.0435605	0.472696	-0.512877	2.60086e-08	-0.00803437	0.935803
miR-335	down	CLDN7	up	-0.511858	2.80064e-08	-0.018958	0.59539	-0.0562108	0.353961	-0.511858	2.80064e-08	0.158299	0.110256
miR-203a	up	MCTP1	down	-0.5115	2.87435e-08	-0.0781787	0.0283031	0.0112156	0.85338	-0.5115	2.87435e-08	-0.155304	0.117244
miR-335	down	PRR15L	up	-0.510558	3.07713e-08	0.0367786	0.302786	-0.167949	0.00531711	-0.510558	3.07713e-08	0.0466904	0.63955
miR-335	down	PAQR6	up	-0.510107	3.17917e-08	0.0254598	0.47571	0.0579617	0.339146	-0.510107	3.17917e-08	0.0348348	0.726845
miR-335	down	LLGL2	up	-0.510009	3.20156e-08	0.031648	0.375268	0.0396982	0.51287	-0.510009	3.20156e-08	-0.0757776	0.446796
miR-335	down	RASGRP1	up	-0.509286	3.37287e-08	0.0211692	0.553185	0.0442811	0.465397	-0.509286	3.37287e-08	0.111777	0.260972
miR-183	up	ZEB1	down	-0.508042	3.68825e-08	-0.14858	2.85402e-05	-0.124391	0.0396268	-0.508042	3.68825e-08	-0.0789865	0.42773
miR-335	down	FAM102A	up	-0.507303	3.88848e-08	-0.00612371	0.863815	-0.0794962	0.189534	-0.507303	3.88848e-08	-0.152936	0.123008
miR-493	up	CRTAP	down	-0.506669	4.06864e-08	0.325748	6.54148e-21	0.312148	1.32213e-07	-0.506669	4.06864e-08	0.376571	8.8375e-05
miR-3065	up	FZD5	down	-0.505911	4.29476e-08	-0.0712135	0.045809	-0.00761279	0.900175	-0.505911	4.29476e-08	-0.113941	0.251797
miR-335	down	ZMAT4	up	-0.50464	4.70068e-08	0.0638817	0.0732791	0.0734093	0.225811	-0.50464	4.70068e-08	0.00385916	0.969139
miR-335	down	ANKRD22	up	-0.504511	4.74374e-08	0.0196095	0.582803	0.027974	0.64478	-0.504511	4.74374e-08	-0.0397651	0.690037
miR-342	up	MAPK10	down	-0.50298	5.28626e-08	-0.0868695	0.0147797	-0.133634	0.0269763	-0.50298	5.28626e-08	-0.198026	0.0449501
miR-203a	up	DGAT2	down	-0.502027	5.65316e-08	0.0431291	0.226831	0.137997	0.0223267	-0.502027	5.65316e-08	-0.00471911	0.962267
miR-215	down	CDCA4	up	-0.501559	5.84222e-08	-0.0238401	0.504242	-0.0235175	0.698343	-0.501559	5.84222e-08	0.0560053	0.574187
miR-21	up	RHOQ	down	-0.501395	5.90983e-08	-0.0643868	0.0710311	0.026538	0.661857	-0.501395	5.90983e-08	0.00756098	0.939578
miR-335	down	HID1	up	-0.500664	6.22038e-08	0.15727	9.31174e-06	0.117421	0.052198	-0.500664	6.22038e-08	0.165959	0.0938592
miR-21	up	CFL2	down	-0.500333	6.366e-08	-0.106647	0.00273901	-0.063743	0.293084	-0.500333	6.366e-08	-0.145683	0.142016
miR-215	down	RTKN2	up	-0.499925	6.55035e-08	0.0796231	0.0255024	0.0319878	0.598051	-0.499925	6.55035e-08	0.0923836	0.353337
miR-342	up	ADM	down	-0.499428	6.78172e-08	-0.32573	6.57413e-21	-0.186058	0.00198287	-0.499428	6.78172e-08	-0.116153	0.242646
miR-21	up	EGFR	down	-0.498534	7.21701e-08	-0.0670686	0.0600211	-0.00244688	0.96784	-0.498534	7.21701e-08	0.0125177	0.900131
miR-203a	up	GAS1	down	-0.497948	7.51701e-08	0.10539	0.00307519	0.191495	0.00144831	-0.497948	7.51701e-08	0.154043	0.120285
miR-21	up	C20orf194	down	-0.497903	7.54052e-08	0.0974524	0.00621813	0.157168	0.00916287	-0.497903	7.54052e-08	0.0171217	0.863706
miR-190b	up	ADCYAP1R1	down	-0.496463	8.3312e-08	-0.00279263	0.937654	-0.216023	0.000315672	-0.496463	8.3312e-08	0.185205	0.0610783
miR-190b	up	FOXN2	down	-0.496375	8.38158e-08	-0.486926	4.308e-48	-0.403218	3.89817e-12	-0.496375	8.38158e-08	-0.445003	2.48148e-06
miR-144	down	SLC39A6	up	-0.496027	8.58561e-08	0.135986	0.00012992	0.0120963	0.842011	-0.496027	8.58561e-08	0.200567	0.042216
miR-335	down	GRB7	up	-0.495901	8.66028e-08	-0.0283174	0.427604	0.0917815	0.129644	-0.495901	8.66028e-08	-0.103047	0.300292
miR-335	down	PRSS8	up	-0.493876	9.95389e-08	0.0895475	0.0119648	-0.144008	0.0170649	-0.493876	9.95389e-08	0.0512379	0.607253
miR-200a	up	YAP1	down	-0.493543	1.01832e-07	-0.0672043	0.0595039	0.000235685	0.996901	-0.493543	1.01832e-07	-0.057106	0.566674
miR-335	down	BIK	up	-0.493129	1.0476e-07	0.0118137	0.740719	-0.0582977	0.336348	-0.493129	1.0476e-07	0.0754392	0.448834
miR-183	up	NEGR1	down	-0.492752	1.07492e-07	-0.111214	0.00177999	-0.082297	0.174357	-0.492752	1.07492e-07	0.00887555	0.929098
miR-144	down	EZH2	up	-0.492744	1.07548e-07	-0.173624	9.56973e-07	-0.0478016	0.430644	-0.492744	1.07548e-07	-0.227755	0.0206817
miR-183	up	PDP2	down	-0.492031	1.12907e-07	0.0824322	0.020735	0.034231	0.572619	-0.492031	1.12907e-07	0.0618374	0.534918
miR-342	up	PTGIS	down	-0.491825	1.14503e-07	-0.246066	2.56059e-12	-0.250729	2.68585e-05	-0.491825	1.14503e-07	-0.295205	0.00246827
miR-335	down	MAT1A	up	-0.490636	1.24137e-07	0.0590354	0.0979324	0.139519	0.0208769	-0.490636	1.24137e-07	-0.0644355	0.517865
miR-215	down	LMNB1	up	-0.48981	1.3128e-07	0.0518097	0.146471	0.0441054	0.46717	-0.48981	1.3128e-07	0.165429	0.0949281
miR-335	down	SPDEF	up	-0.489437	1.34631e-07	0.108752	0.00224983	0.134113	0.0264281	-0.489437	1.34631e-07	0.180236	0.0684825
miR-335	down	MSLN	up	-0.48914	1.3736e-07	-0.154377	1.36111e-05	-0.18799	0.00177523	-0.48914	1.3736e-07	-0.143893	0.147035
miR-335	down	MAST1	up	-0.488743	1.4108e-07	-0.0105027	0.768621	0.0772028	0.202665	-0.488743	1.4108e-07	-0.150379	0.129472
miR-335	down	PAH	up	-0.487811	1.50213e-07	0.122753	0.00055804	0.163139	0.00680513	-0.487811	1.50213e-07	0.0799639	0.422017
miR-335	down	ESRP1	up	-0.486945	1.59203e-07	-0.0270962	0.447808	-0.0880677	0.145963	-0.486945	1.59203e-07	-0.00464921	0.962825
miR-365a	down	TSPAN1	up	-0.4868	1.60756e-07	0.343988	2.79846e-23	0.275479	3.67404e-06	-0.4868	1.60756e-07	0.213767	0.0301474
miR-182	up	EIF4EBP2	down	-0.486492	1.64112e-07	-0.0464961	0.192571	-0.037363	0.53799	-0.486492	1.64112e-07	0.0865883	0.384472
miR-365b	down	TSPAN1	up	-0.486153	1.67871e-07	0.340683	7.7247e-23	0.275432	3.6887e-06	-0.486153	1.67871e-07	0.213113	0.0306673
miR-3065	up	TXNIP	down	-0.485881	1.70947e-07	-0.0321233	0.368136	-0.000441627	0.994194	-0.485881	1.70947e-07	-0.086676	0.383989
miR-21	up	DDR2	down	-0.48542	1.76293e-07	0.130043	0.000254271	0.175784	0.00350935	-0.48542	1.76293e-07	-0.0241584	0.808606
miR-187	up	C19orf12	down	-0.484579	1.86452e-07	0.0604921	0.0899101	0.0253529	0.676083	-0.484579	1.86452e-07	-0.065685	0.509763
miR-335	down	CDHR2	up	-0.484276	1.90237e-07	0.0380703	0.28611	-0.0468098	0.44028	-0.484276	1.90237e-07	0.0301608	0.762323
miR-215	down	FOXA1	up	-0.483716	1.97443e-07	0.0619683	0.0823279	-0.106482	0.078487	-0.483716	1.97443e-07	-0.02099	0.833317
miR-145	down	BUB1	up	-0.482655	2.11815e-07	-0.271084	1.00891e-14	-0.0805242	0.183855	-0.482655	2.11815e-07	-0.240844	0.0142596
miR-182	up	ECHDC1	down	-0.48248	2.14274e-07	-0.159143	7.25591e-06	-0.159194	0.00829195	-0.48248	2.14274e-07	-0.0516894	0.604085
miR-335	down	TRPM8	up	-0.482457	2.14613e-07	-0.112717	0.00153929	-0.0209091	0.730423	-0.482457	2.14613e-07	-0.182505	0.065016
miR-21	up	SPRY2	down	-0.481999	2.21189e-07	-0.119525	0.000779911	0.0250796	0.679381	-0.481999	2.21189e-07	-0.123568	0.213668
miR-141	up	MYOCD	down	-0.479785	2.55841e-07	-0.239679	9.57889e-12	-0.166801	0.0056428	-0.479785	2.55841e-07	-0.425402	7.4863e-06
miR-190b	up	IGF1	down	-0.479482	2.60981e-07	0.0106589	0.765282	-0.0789187	0.192781	-0.479482	2.60981e-07	0.0940241	0.344817
miR-215	down	FAM222A	up	-0.478469	2.78825e-07	0.039783	0.264971	0.0582277	0.33693	-0.478469	2.78825e-07	0.181538	0.0664747
miR-21	up	ATP2B4	down	-0.477107	3.04673e-07	0.0352335	0.323565	0.109189	0.0711476	-0.477107	3.04673e-07	0.197377	0.0456713
miR-335	down	RALGPS2	up	-0.47656	3.15693e-07	0.088258	0.0132548	0.0148257	0.806998	-0.47656	3.15693e-07	0.357826	0.000206545
miR-215	down	BARD1	up	-0.476392	3.19136e-07	0.0780001	0.0286672	0.0323859	0.5935	-0.476392	3.19136e-07	0.192284	0.0516724
miR-183	up	TMEM170B	down	-0.47624	3.22298e-07	-0.017282	0.628324	-0.0733378	0.226265	-0.47624	3.22298e-07	-0.0899546	0.366191
miR-139	down	SLC39A6	up	-0.474309	3.65114e-07	0.247701	1.81549e-12	0.0526037	0.385742	-0.474309	3.65114e-07	0.210296	0.0329963
miR-215	down	TTK	up	-0.473425	3.86439e-07	0.0357568	0.316426	0.104781	0.0834041	-0.473425	3.86439e-07	0.136644	0.168722
miR-335	down	GRHL3	up	-0.471989	4.23676e-07	-0.0816538	0.0219714	-0.187152	0.00186269	-0.471989	4.23676e-07	0.0160944	0.871812
miR-203a	up	CREB5	down	-0.471957	4.24541e-07	0.0574121	0.107534	0.10089	0.0955856	-0.471957	4.24541e-07	0.029219	0.769534
miR-335	down	OGDHL	up	-0.47095	4.52725e-07	-0.0217574	0.54221	0.0107417	0.859509	-0.47095	4.52725e-07	0.0749878	0.451561
miR-135b	up	KLF4	down	-0.470672	4.60789e-07	-0.102034	0.00416545	-0.0498546	0.411088	-0.470672	4.60789e-07	-0.0121576	0.90299
miR-335	down	HGFAC	up	-0.47064	4.61727e-07	0.0756421	0.0338634	0.120757	0.045818	-0.47064	4.61727e-07	-0.0143929	0.885266
miR-215	down	KIFC1	up	-0.470269	4.72771e-07	-0.0222316	0.533442	0.0147764	0.807628	-0.470269	4.72771e-07	0.113484	0.253713
miR-183	up	AKAP12	down	-0.469827	4.86226e-07	-0.165911	2.87623e-06	-0.125971	0.0371638	-0.469827	4.86226e-07	-0.0412059	0.679412
miR-335	down	COL9A3	up	-0.468519	5.28217e-07	-0.147888	3.11193e-05	-0.0370586	0.54131	-0.468519	5.28217e-07	-0.270254	0.00576459
miR-335	down	NPAS1	up	-0.468476	5.2966e-07	0.0214023	0.548824	0.0139615	0.818046	-0.468476	5.2966e-07	-0.121473	0.221592
miR-378a	down	HES2	up	-0.468268	5.36659e-07	0.0783027	0.0280527	0.0878572	0.146932	-0.468268	5.36659e-07	0.180882	0.06748
miR-182	up	ANO6	down	-0.467929	5.48278e-07	0.0258792	0.468471	-0.0460459	0.447785	-0.467929	5.48278e-07	0.141763	0.153176
miR-335	down	MUC1	up	-0.467187	5.7452e-07	-0.089704	0.011816	-0.176389	0.00339611	-0.467187	5.7452e-07	0.00809431	0.935325
miR-155	up	PCYOX1	down	-0.46641	6.03258e-07	-0.248382	1.57235e-12	-0.22963	0.000125543	-0.46641	6.03258e-07	-0.249809	0.0109331
miR-342	up	FAM107A	down	-0.466378	6.04457e-07	-0.259677	1.35564e-13	-0.195622	0.00113468	-0.466378	6.04457e-07	-0.260997	0.00774886
miR-21	up	REV3L	down	-0.466006	6.1876e-07	-0.127914	0.00032127	-0.0880532	0.146029	-0.466006	6.1876e-07	-0.166854	0.0920764
miR-183	up	SLC24A4	down	-0.465471	6.39857e-07	-0.262222	7.67612e-14	-0.168301	0.0052206	-0.465471	6.39857e-07	-0.267958	0.00620935
miR-183	up	KCTD12	down	-0.465241	6.4912e-07	-0.290919	8.14359e-17	-0.180061	0.00277698	-0.465241	6.4912e-07	-0.141312	0.154499
miR-335	down	CLCN2	up	-0.464181	6.93541e-07	0.0903422	0.0112263	-0.0394065	0.515973	-0.464181	6.93541e-07	0.01755	0.860331
miR-183	up	MYCBP2	down	-0.463992	7.01769e-07	-0.141788	6.56501e-05	-0.150974	0.0123493	-0.463992	7.01769e-07	-0.262639	0.00735803
miR-215	down	MAP6D1	up	-0.462917	7.50261e-07	-0.0529289	0.137936	-0.183995	0.00222904	-0.462917	7.50261e-07	-0.029187	0.76978
miR-335	down	KCNH2	up	-0.462727	7.59171e-07	0.0117085	0.742948	0.00136394	0.98207	-0.462727	7.59171e-07	-0.0455117	0.648035
miR-503	up	RECK	down	-0.461994	7.94454e-07	0.00378381	0.915598	-0.0727227	0.230193	-0.461994	7.94454e-07	0.252667	0.0100264
miR-215	down	PASK	up	-0.461127	8.38194e-07	0.0485205	0.17389	0.0601987	0.320802	-0.461127	8.38194e-07	-0.0033992	0.972816
miR-335	down	CAPN13	up	-0.460257	8.84392e-07	0.0490846	0.168934	0.0431862	0.476513	-0.460257	8.84392e-07	0.0893126	0.369636
miR-335	down	ZG16B	up	-0.459758	9.11955e-07	0.0732971	0.0398077	-0.0297133	0.624344	-0.459758	9.11955e-07	0.232262	0.0182346
miR-335	down	DDN	up	-0.459648	9.18137e-07	-0.0130978	0.713716	-0.0073556	0.903531	-0.459648	9.18137e-07	-0.158036	0.110858
miR-200a	up	SOX17	down	-0.459483	9.27504e-07	-0.138806	9.35483e-05	-0.0234134	0.699614	-0.459483	9.27504e-07	-0.070995	0.476076
miR-215	down	CCNO	up	-0.458027	1.01405e-06	0.048939	0.170204	-0.0484647	0.42427	-0.458027	1.01405e-06	-0.0113945	0.909053
miR-193a	down	SLC7A5	up	-0.457723	1.03304e-06	-0.113324	0.00145073	0.038408	0.526673	-0.457723	1.03304e-06	-0.0529883	0.595015
miR-378a	down	ARHGEF39	up	-0.456243	1.13055e-06	0.145575	4.14498e-05	0.132604	0.0281885	-0.456243	1.13055e-06	-0.0128133	0.897786
miR-3065	up	TWIST1	down	-0.456077	1.14203e-06	-0.131547	0.000215108	-0.200876	0.000825699	-0.456077	1.14203e-06	-0.152405	0.124328
miR-378a	down	BRIP1	up	-0.45607	1.14253e-06	0.0217255	0.542802	-0.0723079	0.23287	-0.45607	1.14253e-06	-0.059462	0.55075
miR-155	up	CAT	down	-0.455975	1.14908e-06	-0.0598316	0.0934797	0.016303	0.788201	-0.455975	1.14908e-06	-0.200795	0.0419779
miR-135b	up	AMOTL2	down	-0.455092	1.21236e-06	0.0707451	0.0472579	0.102445	0.0905571	-0.455092	1.21236e-06	0.0878373	0.377626
miR-335	down	HSH2D	up	-0.454956	1.22234e-06	0.00674791	0.85009	-0.121932	0.0437327	-0.454956	1.22234e-06	0.115108	0.246941
miR-452	down	ZWINT	up	-0.454898	1.22668e-06	0.0742068	0.0374043	-0.0107591	0.859285	-0.454898	1.22668e-06	0.187374	0.0580587
miR-215	down	CENPK	up	-0.454663	1.24419e-06	0.0502017	0.159433	0.0277756	0.647129	-0.454663	1.24419e-06	0.0337594	0.73496
miR-141	up	YAP1	down	-0.454626	1.24703e-06	-0.200263	1.45604e-08	-0.116668	0.0537359	-0.454626	1.24703e-06	-0.197648	0.0453696
miR-99a	down	TUBG1	up	-0.454303	1.27157e-06	-0.357775	3.54153e-25	-0.344268	4.84356e-09	-0.454303	1.27157e-06	-0.264124	0.00701993
miR-215	down	NOD2	up	-0.453858	1.3062e-06	0.0365453	0.305866	0.117569	0.0519005	-0.453858	1.3062e-06	-0.0154822	0.876649
miR-21	up	BCL6	down	-0.453847	1.3071e-06	0.0411029	0.24943	-0.0014426	0.981036	-0.453847	1.3071e-06	0.0746745	0.453459
miR-215	down	KIF23	up	-0.453674	1.32075e-06	0.0496178	0.164347	0.071741	0.236563	-0.453674	1.32075e-06	0.216926	0.0277379
miR-182	up	FOXO1	down	-0.453646	1.32303e-06	-0.219838	4.55159e-10	-0.143441	0.0175098	-0.453646	1.32303e-06	-0.145103	0.143627
miR-96	up	SOX5	down	-0.453439	1.33968e-06	-0.106236	0.00284492	-0.115262	0.0567065	-0.453439	1.33968e-06	-0.132418	0.182409
miR-375	up	EMP1	down	-0.452931	1.38128e-06	-0.307365	1.10991e-18	-0.313536	1.15508e-07	-0.452931	1.38128e-06	-0.367484	0.00013424
miR-141	up	EPB41L4B	down	-0.452595	1.40945e-06	0.189519	8.46896e-08	0.0782696	0.196478	-0.452595	1.40945e-06	0.164385	0.0970615
miR-183	up	GAS1	down	-0.452507	1.4169e-06	-0.316008	1.03842e-19	-0.159976	0.0079762	-0.452507	1.4169e-06	-0.107117	0.2815
miR-503	up	CYP26B1	down	-0.45193	1.4668e-06	-0.0199414	0.57644	-0.0550618	0.363901	-0.45193	1.4668e-06	0.0209478	0.833648
miR-365a	down	MCOLN2	up	-0.451699	1.48725e-06	-0.285693	3.01055e-16	-0.120724	0.0458775	-0.451699	1.48725e-06	-0.270892	0.00564626
miR-378a	down	NPNT	up	-0.451529	1.50247e-06	-0.371897	3.20897e-27	-0.30853	1.87395e-07	-0.451529	1.50247e-06	-0.206586	0.0362894
miR-215	down	KIF18A	up	-0.451355	1.51822e-06	0.0831624	0.0196307	0.0459409	0.448822	-0.451355	1.51822e-06	0.0938073	0.345936
miR-365b	down	MCOLN2	up	-0.451281	1.52496e-06	-0.283913	4.67091e-16	-0.12162	0.0442786	-0.451281	1.52496e-06	-0.276841	0.00464179
miR-3065	up	PDP2	down	-0.451104	1.54121e-06	0.0190248	0.594095	0.133439	0.0272021	-0.451104	1.54121e-06	0.136487	0.169215
miR-215	down	SLC7A11	up	-0.451009	1.55001e-06	0.0272727	0.444854	0.0451789	0.456389	-0.451009	1.55001e-06	0.14444	0.145486
miR-215	down	RDM1	up	-0.450852	1.56457e-06	-0.00323496	0.927804	-0.0348222	0.566002	-0.450852	1.56457e-06	0.106565	0.284002
miR-139	down	FAM83H	up	-0.450831	1.56658e-06	-0.168599	1.97122e-06	-0.221087	0.000225431	-0.450831	1.56658e-06	-0.121323	0.22217
miR-335	down	CYB561	up	-0.45039	1.60834e-06	-0.00187911	0.958025	-0.075242	0.214405	-0.45039	1.60834e-06	-0.0153575	0.877635
miR-96	up	FOXO1	down	-0.450052	1.6411e-06	-0.352703	1.81253e-24	-0.334341	1.40215e-08	-0.450052	1.6411e-06	-0.349714	0.000293548
miR-335	down	MAGED2	up	-0.448667	1.78205e-06	0.0394951	0.268446	0.0139773	0.817844	-0.448667	1.78205e-06	0.09764	0.326499
miR-182	up	PCOLCE2	down	-0.447824	1.87329e-06	-0.248728	1.46122e-12	-0.103553	0.0871042	-0.447824	1.87329e-06	-0.143373	0.148516
miR-335	down	RUNX2	up	-0.447202	1.94349e-06	-0.123972	0.000490718	0.0403617	0.505845	-0.447202	1.94349e-06	-0.112001	0.260012
miR-365a	down	ZWINT	up	-0.444509	2.2771e-06	-0.0751089	0.035144	0.0389532	0.520817	-0.444509	2.2771e-06	-0.174364	0.0781488
miR-365b	down	ZWINT	up	-0.44425	2.31186e-06	-0.0747	0.0361536	0.0370751	0.54113	-0.44425	2.31186e-06	-0.178668	0.070964
miR-365a	down	HIST1H2AE	up	-0.444087	2.334e-06	0.114921	0.00123999	0.0549936	0.364496	-0.444087	2.334e-06	0.322278	0.000900537
miR-335	down	TRIB3	up	-0.443774	2.37716e-06	0.0229788	0.519773	-0.115834	0.0554822	-0.443774	2.37716e-06	0.00641564	0.948717
miR-182	up	NR3C1	down	-0.443168	2.46276e-06	-0.187679	1.13355e-07	-0.220603	0.000232887	-0.443168	2.46276e-06	-0.195731	0.0475447
miR-551b	down	SHISA9	up	-0.442894	2.50236e-06	-0.00666129	0.851992	0.0438703	0.46955	-0.442894	2.50236e-06	0.187377	0.0580548
miR-375	up	CYP2U1	down	-0.442729	2.52658e-06	0.0151149	0.672021	0.0413348	0.495634	-0.442729	2.52658e-06	0.0444031	0.656058
miR-944	down	GPR158	up	-0.442459	2.56655e-06	-0.0748163	0.035864	-0.117622	0.0517944	-0.442459	2.56655e-06	-0.0381987	0.701658
miR-335	down	KLHDC7B	up	-0.441966	2.64122e-06	-0.0681886	0.0558614	-0.120737	0.0458541	-0.441966	2.64122e-06	-0.154953	0.118083
miR-335	down	AGR3	up	-0.440951	2.80137e-06	0.127448	0.000337962	0.00274237	0.963958	-0.440951	2.80137e-06	0.210912	0.0324748
miR-21	up	SASH1	down	-0.440883	2.81243e-06	-0.0329526	0.355893	0.00035395	0.995347	-0.440883	2.81243e-06	-0.0579662	0.560834
miR-335	down	CST6	up	-0.440105	2.94174e-06	0.00655835	0.854253	-0.0839212	0.16598	-0.440105	2.94174e-06	-0.124957	0.208525
miR-335	down	MUC6	up	-0.439259	3.08893e-06	0.0325735	0.361458	0.0524947	0.386728	-0.439259	3.08893e-06	-0.0523182	0.599686
miR-335	down	CACNB3	up	-0.438112	3.2995e-06	0.0958703	0.00711471	0.0266423	0.66061	-0.438112	3.2995e-06	0.0348109	0.727024
miR-497	down	TPM3	up	-0.437928	3.33446e-06	-0.20213	1.06156e-08	-0.337042	1.05391e-08	-0.437928	3.33446e-06	-0.218607	0.0265246
miR-21	up	UTRN	down	-0.437335	3.44969e-06	0.0416618	0.243045	0.116073	0.0549771	-0.437335	3.44969e-06	0.0310326	0.755666
miR-193a	down	ERBB2	up	-0.436531	3.61205e-06	0.220695	3.88036e-10	0.33639	1.12942e-08	-0.436531	3.61205e-06	0.16005	0.106326
miR-215	down	TICRR	up	-0.435886	3.74751e-06	0.0446484	0.21087	0.0756265	0.212066	-0.435886	3.74751e-06	0.198539	0.0443868
miR-342	up	TAL1	down	-0.435142	3.90969e-06	-0.00136716	0.969454	-0.109115	0.0713395	-0.435142	3.90969e-06	0.0854688	0.390672
miR-342	up	PLA2G4A	down	-0.434631	4.02469e-06	-0.367523	1.41277e-26	-0.260683	1.23586e-05	-0.434631	4.02469e-06	-0.29676	0.00233527
miR-203a	up	PRICKLE2	down	-0.434335	4.09293e-06	-0.00819138	0.81853	0.00749354	0.901731	-0.434335	4.09293e-06	0.0396243	0.691079
miR-100	down	ANAPC11	up	-0.434013	4.16832e-06	-0.19774	2.22138e-08	-0.193422	0.00129313	-0.434013	4.16832e-06	-0.100788	0.311065
miR-335	down	CELSR3	up	-0.433701	4.24264e-06	0.0302612	0.396561	0.00797093	0.895505	-0.433701	4.24264e-06	-0.0876072	0.378882
miR-335	down	PCSK4	up	-0.43367	4.24999e-06	0.138658	9.51931e-05	0.00576484	0.924323	-0.43367	4.24999e-06	0.125035	0.208239
miR-335	down	SUSD3	up	-0.433528	4.28438e-06	0.0777547	0.029174	-0.0154014	0.799659	-0.433528	4.28438e-06	0.123506	0.213898
miR-200c	up	DUSP1	down	-0.432984	4.4181e-06	-0.163784	3.86245e-06	-0.185157	0.00208722	-0.432984	4.4181e-06	-0.235233	0.0167623
miR-335	down	SLC52A1	up	-0.43291	4.43666e-06	0.0213847	0.549153	0.0733799	0.225998	-0.43291	4.43666e-06	0.0731454	0.462785
miR-21	up	LIMCH1	down	-0.432688	4.4925e-06	-0.00219441	0.95099	-0.0197104	0.745328	-0.432688	4.4925e-06	0.135297	0.172998
miR-378a	down	GP2	up	-0.432256	4.60322e-06	-0.304107	2.65714e-18	-0.235809	8.10694e-05	-0.432256	4.60322e-06	-0.317508	0.001083
miR-335	down	CBX4	up	-0.431811	4.71989e-06	0.0913409	0.0103557	-0.0138393	0.819612	-0.431811	4.71989e-06	0.108376	0.275851
miR-891a	down	BAMBI	up	-0.431579	4.78201e-06	0.0498047	0.162762	-0.0164245	0.78666	-0.431579	4.78201e-06	-0.0405366	0.68434
miR-584	down	TRIB3	up	-0.430954	4.95276e-06	-0.113392	0.00144121	-0.129328	0.0323578	-0.430954	4.95276e-06	-0.171143	0.0839002
miR-215	down	BUB1B	up	-0.430859	4.9793e-06	0.0506069	0.156087	0.0878217	0.147096	-0.430859	4.9793e-06	0.160859	0.104545
miR-335	down	HGD	up	-0.430476	5.08723e-06	0.0423678	0.235145	0.0595681	0.325907	-0.430476	5.08723e-06	0.0174346	0.86124
miR-215	down	EEF1A2	up	-0.430416	5.10428e-06	-0.018568	0.602984	-0.11887	0.0493409	-0.430416	5.10428e-06	0.0891499	0.370512
miR-335	down	MISP	up	-0.430333	5.12821e-06	0.0601278	0.0918653	-0.133987	0.0265716	-0.430333	5.12821e-06	0.306745	0.00162452
miR-144	down	SPAG1	up	-0.430144	5.18261e-06	0.00956198	0.788833	-0.00198903	0.973855	-0.430144	5.18261e-06	-0.0151464	0.879304
miR-183	up	REV3L	down	-0.42931	5.42987e-06	-0.0466201	0.191386	-0.101028	0.0951286	-0.42931	5.42987e-06	-0.165631	0.0945185
miR-21	up	TCF21	down	-0.428969	5.5342e-06	0.149538	2.52993e-05	-0.0210275	0.728957	-0.428969	5.5342e-06	0.14587	0.141499
miR-106a	up	STAC2	down	-0.428968	5.53451e-06	-0.0219127	0.53933	0.0847448	0.161849	-0.428968	5.53451e-06	0.149076	0.132863
miR-335	down	KRT19	up	-0.428849	5.57149e-06	0.0203358	0.568921	-0.0184244	0.761425	-0.428849	5.57149e-06	0.0848112	0.394341
miR-335	down	ZPLD1	up	-0.428717	5.61241e-06	-0.0760324	0.0329514	-0.0418001	0.49079	-0.428717	5.61241e-06	-0.128498	0.195814
miR-106a	up	KIAA1456	down	-0.428538	5.66884e-06	-0.170141	1.58267e-06	-0.0637904	0.292724	-0.428538	5.66884e-06	-0.054094	0.587342
miR-335	down	MYO3B	up	-0.428481	5.68692e-06	-0.140723	7.45633e-05	-0.163993	0.00651631	-0.428481	5.68692e-06	-0.0637531	0.522317
miR-335	down	RAB11FIP1	up	-0.42836	5.72507e-06	0.119653	0.000769747	-0.00162186	0.97868	-0.42836	5.72507e-06	0.245938	0.0122757
miR-200b	up	SOX17	down	-0.428158	5.79009e-06	-0.0902641	0.0112971	0.0547081	0.366995	-0.428158	5.79009e-06	-0.106798	0.282945
miR-342	up	BMP2	down	-0.428041	5.82772e-06	-0.331489	1.22217e-21	-0.271549	5.10626e-06	-0.428041	5.82772e-06	-0.267294	0.00634351
miR-215	down	TYMS	up	-0.426976	6.1823e-06	-0.0391777	0.272315	0.0113125	0.852127	-0.426976	6.1823e-06	0.171424	0.0833858
miR-335	down	TERT	up	-0.426823	6.23512e-06	0.0199649	0.575991	0.0625541	0.302198	-0.426823	6.23512e-06	0.103819	0.296665
miR-375	up	RASD1	down	-0.426785	6.24816e-06	-0.0225891	0.52688	-0.0871742	0.150113	-0.426785	6.24816e-06	-0.0675673	0.497683
miR-205	down	SLC5A12	up	-0.42661	6.30899e-06	-0.11047	0.00191153	-0.116531	0.0540201	-0.42661	6.30899e-06	-0.0194836	0.845125
miR-181b-2	up	QKI	down	-0.425977	6.53374e-06	-0.0169755	0.63443	0.0351289	0.562584	-0.425977	6.53374e-06	-0.0508711	0.609831
miR-183	up	KCNT2	down	-0.425414	6.73989e-06	-0.277898	2.01307e-15	-0.243549	4.61038e-05	-0.425414	6.73989e-06	-0.321146	0.00094109
miR-365a	down	CDC25A	up	-0.42513	6.84603e-06	-0.230653	5.798e-11	-0.047934	0.429366	-0.42513	6.84603e-06	-0.28876	0.00309526
miR-145	down	SOX11	up	-0.424087	7.25033e-06	-0.12523	0.000429226	-0.00756265	0.900829	-0.424087	7.25033e-06	0.0393504	0.693107
miR-96	up	ABCA6	down	-0.424021	7.27652e-06	-0.317706	6.45972e-20	-0.224906	0.000174005	-0.424021	7.27652e-06	-0.174942	0.0771516
miR-335	down	SDR16C5	up	-0.423598	7.44748e-06	-0.107176	0.00260771	0.00329094	0.956755	-0.423598	7.44748e-06	-0.121453	0.22167
miR-215	down	BRIP1	up	-0.423495	7.48934e-06	0.0671109	0.0598596	0.116003	0.0551244	-0.423495	7.48934e-06	0.231847	0.0184492
miR-21	up	CYBRD1	down	-0.422737	7.80686e-06	0.0963061	0.00685686	0.0721319	0.234012	-0.422737	7.80686e-06	0.108471	0.275427
miR-200c	up	KLF9	down	-0.422332	7.98121e-06	-0.221488	3.34643e-10	-0.109635	0.0699935	-0.422332	7.98121e-06	-0.211652	0.0318577
miR-452	down	SLC7A2	up	-0.421413	8.39138e-06	-0.320082	3.3071e-20	-0.347073	3.56212e-09	-0.421413	8.39138e-06	-0.410307	1.67389e-05
miR-145	down	GOLM1	up	-0.421404	8.39539e-06	0.0489785	0.169858	-0.0380049	0.531024	-0.421404	8.39539e-06	0.0311197	0.755001
miR-375	up	YAP1	down	-0.421057	8.55534e-06	-0.251728	7.70273e-13	-0.217554	0.000285359	-0.421057	8.55534e-06	-0.26247	0.00739758
miR-215	down	BRCA2	up	-0.420784	8.68335e-06	0.0765857	0.0316948	0.063123	0.297814	-0.420784	8.68335e-06	0.0400691	0.68779
miR-335	down	ISG20	up	-0.420682	8.7314e-06	-0.0645757	0.0702048	0.00168678	0.977827	-0.420682	8.7314e-06	-0.10054	0.312266
miR-335	down	AGR2	up	-0.419712	9.20261e-06	0.116884	0.00101957	0.0454622	0.453568	-0.419712	9.20261e-06	0.188933	0.0559651
miR-335	down	ARX	up	-0.4197	9.20873e-06	0.0631167	0.0767943	0.0283389	0.64047	-0.4197	9.20873e-06	0.0575662	0.563546
miR-215	down	RIMKLA	up	-0.419498	9.30998e-06	0.129703	0.000264025	-0.116547	0.0539858	-0.419498	9.30998e-06	0.0135504	0.89194
miR-335	down	RIIAD1	up	-0.419235	9.44332e-06	0.12421	0.000478487	0.0436689	0.471594	-0.419235	9.44332e-06	0.251987	0.0102359
miR-378a	down	RABEP2	up	-0.418294	9.9351e-06	-0.0379963	0.287047	0.00206858	0.97281	-0.418294	9.9351e-06	-0.0339289	0.733679
miR-378a	down	HIST1H2BD	up	-0.418121	1.00284e-05	-0.258873	1.6204e-13	-0.24647	3.70783e-05	-0.418121	1.00284e-05	-0.289497	0.00301692
miR-21	up	FMOD	down	-0.418085	1.00479e-05	0.130523	0.000241104	0.156635	0.00940506	-0.418085	1.00479e-05	0.176577	0.0743855
miR-182	up	RECK	down	-0.417947	1.01227e-05	-0.2051	6.38046e-09	-0.121534	0.0444312	-0.417947	1.01227e-05	0.00786319	0.937168
miR-493	up	FZD4	down	-0.417822	1.01911e-05	0.317686	6.49481e-20	0.157299	0.00910428	-0.417822	1.01911e-05	0.374642	9.66745e-05
miR-96	up	EIF4EBP2	down	-0.417561	1.03354e-05	-0.0754167	0.0343998	0.0261674	0.666293	-0.417561	1.03354e-05	0.0629774	0.527401
miR-335	down	SLC9A3R1	up	-0.417287	1.04886e-05	0.111054	0.0018075	0.00975193	0.872338	-0.417287	1.04886e-05	0.0948353	0.340653
miR-182	up	TMEM170B	down	-0.417251	1.05086e-05	-0.00756409	0.832212	-0.118789	0.0494977	-0.417251	1.05086e-05	-0.0410824	0.68032
miR-335	down	KDM4B	up	-0.416978	1.06638e-05	0.0968137	0.00656708	0.0126669	0.834664	-0.416978	1.06638e-05	0.0372814	0.708496
miR-493	up	VLDLR	down	-0.415433	1.15833e-05	0.0321377	0.367921	0.137904	0.0224183	-0.415433	1.15833e-05	0.226179	0.0216011
miR-335	down	XKRX	up	-0.415333	1.16454e-05	-0.0645134	0.0704767	0.054802	0.366172	-0.415333	1.16454e-05	-0.0947239	0.341223
miR-503	up	LYVE1	down	-0.414156	1.23988e-05	0.100144	0.00492346	0.0309003	0.61056	-0.414156	1.23988e-05	0.164808	0.0961924
miR-503	up	GLP2R	down	-0.413205	1.30412e-05	-0.0176472	0.621083	-0.101996	0.091985	-0.413205	1.30412e-05	0.0432447	0.664483
miR-452	down	MIS18A	up	-0.413145	1.30829e-05	0.208531	3.51012e-09	0.117799	0.051439	-0.413145	1.30829e-05	0.248117	0.0115034
miR-335	down	WNT7B	up	-0.413034	1.31601e-05	0.0853563	0.0166154	-0.0965764	0.110702	-0.413034	1.31601e-05	0.119761	0.228222
miR-335	down	ABCA12	up	-0.412301	1.36805e-05	-0.0192417	0.589894	-0.0888676	0.142322	-0.412301	1.36805e-05	0.000396374	0.99683
miR-335	down	PARD6B	up	-0.410387	1.51326e-05	0.0880964	0.0134249	-0.0423085	0.485527	-0.410387	1.51326e-05	0.15762	0.111813
miR-96	up	MGST1	down	-0.410221	1.52648e-05	0.0340783	0.339692	0.0650147	0.28354	-0.410221	1.52648e-05	0.0950219	0.339699
miR-335	down	CACNG4	up	-0.410213	1.52714e-05	0.0728384	0.0410682	0.000649535	0.991461	-0.410213	1.52714e-05	0.190282	0.0542027
miR-144	down	CDCA3	up	-0.409487	1.58645e-05	-0.132403	0.000195412	-0.0755775	0.212363	-0.409487	1.58645e-05	-0.174939	0.0771574
miR-511	down	CHAF1B	up	-0.40926	1.60537e-05	0.0239783	0.501772	-0.0515093	0.395716	-0.40926	1.60537e-05	0.0554748	0.577824
miR-145	down	PAK4	up	-0.408023	1.71261e-05	-0.190501	7.23918e-08	-0.110861	0.0669001	-0.408023	1.71261e-05	-0.0152204	0.878719
miR-335	down	SLC4A8	up	-0.408016	1.71321e-05	0.159722	6.713e-06	0.0796932	0.188436	-0.408016	1.71321e-05	0.35622	0.000221597
miR-335	down	KCNC1	up	-0.407763	1.73597e-05	0.10844	0.00231702	0.0427692	0.480784	-0.407763	1.73597e-05	0.19121	0.0530179
miR-155	up	EZH1	down	-0.407416	1.76764e-05	-0.173378	9.9184e-07	-0.130826	0.0303902	-0.407416	1.76764e-05	-0.043895	0.659748
miR-215	down	ERCC6L	up	-0.407139	1.79328e-05	0.0764001	0.0321117	0.0870248	0.150815	-0.407139	1.79328e-05	0.123776	0.212892
miR-155	up	GABARAPL1	down	-0.40697	1.80913e-05	0.094135	0.00822984	0.0613553	0.311576	-0.40697	1.80913e-05	-0.047897	0.630911
miR-215	down	EME1	up	-0.4068	1.8252e-05	0.0816359	0.0220005	0.00943305	0.876479	-0.4068	1.8252e-05	0.161184	0.103837
miR-145	down	LMNB2	up	-0.405816	1.92073e-05	-0.269785	1.36483e-14	-0.184951	0.00211169	-0.405816	1.92073e-05	-0.235053	0.0168481
miR-342	up	SHC3	down	-0.404953	2.0084e-05	-0.205949	5.509e-09	-0.185437	0.00205429	-0.404953	2.0084e-05	0.0125873	0.899579
miR-335	down	CACNG1	up	-0.403954	2.11449e-05	0.0777123	0.0292621	0.0301403	0.61937	-0.403954	2.11449e-05	0.133032	0.180372
miR-145	down	ABRACL	up	-0.403647	2.14818e-05	-0.146682	3.6156e-05	-0.0528077	0.383899	-0.403647	2.14818e-05	-0.19984	0.0429845
miR-335	down	SAG	up	-0.402968	2.22444e-05	0.0723075	0.0425693	-0.0322512	0.595037	-0.402968	2.22444e-05	0.240208	0.0145258
miR-335	down	SLC7A13	up	-0.402697	2.25559e-05	0.113331	0.00144986	-0.00615642	0.9192	-0.402697	2.25559e-05	0.141429	0.154158
miR-143	down	CENPM	up	-0.400913	2.47092e-05	-0.153747	1.47706e-05	-0.163748	0.00659796	-0.400913	2.47092e-05	-0.11394	0.251798
miR-203a	up	SOCS3	down	-0.400753	2.49119e-05	0.0814593	0.0222901	0.00825986	0.89174	-0.400753	2.49119e-05	0.0640205	0.52057
miR-96	up	TMEM170B	down	-0.400712	2.49642e-05	-0.121123	0.000661483	-0.129536	0.0320775	-0.400712	2.49642e-05	-0.00989465	0.920982
miR-182	up	CHL1	down	-0.400057	2.58107e-05	-0.0480988	0.177666	-0.0386921	0.523617	-0.400057	2.58107e-05	0.0738604	0.45841
miR-335	down	EDDM3B	up	-0.398165	2.84077e-05	0.0369596	0.300411	0.0886767	0.143184	-0.398165	2.84077e-05	0.0259079	0.79504
miR-4732	down	VAMP8	up	-0.397707	2.90721e-05	-0.00721918	0.839757	0.0418342	0.490436	-0.397707	2.90721e-05	-0.131741	0.184677
miR-503	up	FGF2	down	-0.397406	2.95174e-05	-0.0640278	0.0726228	-0.0828049	0.171705	-0.397406	2.95174e-05	0.0741881	0.456414
miR-335	down	FOXA3	up	-0.397151	2.98985e-05	-0.11998	0.000744338	-0.115252	0.0567291	-0.397151	2.98985e-05	-0.13625	0.169965
miR-145	down	CCNA2	up	-0.396682	3.06126e-05	-0.262362	7.43885e-14	-0.104676	0.083715	-0.396682	3.06126e-05	-0.289436	0.00302332
miR-335	down	HMGB3	up	-0.396296	3.12124e-05	-0.128597	0.000298173	-0.126918	0.0357505	-0.396296	3.12124e-05	-0.109254	0.271956
miR-155	up	THRB	down	-0.396175	3.1403e-05	-0.200899	1.30786e-08	-0.197538	0.00101141	-0.396175	3.1403e-05	-0.23929	0.0149178
miR-503	up	LIX1L	down	-0.395385	3.26723e-05	0.00742263	0.835305	-0.0688805	0.255826	-0.395385	3.26723e-05	0.151471	0.126679
miR-181b-2	up	FSTL1	down	-0.394567	3.40362e-05	0.0278949	0.434532	0.0190088	0.754098	-0.394567	3.40362e-05	-0.206475	0.0363922
miR-335	down	NEFH	up	-0.394278	3.45305e-05	0.0478804	0.179645	0.133031	0.0276811	-0.394278	3.45305e-05	0.0176736	0.859357
miR-3127	up	KLF8	down	-0.393956	3.50886e-05	-0.0924706	0.00944357	-0.140172	0.0202805	-0.393956	3.50886e-05	-0.128877	0.194489
miR-335	down	TIGD3	up	-0.393712	3.55187e-05	0.00649245	0.855702	-0.0815783	0.178163	-0.393712	3.55187e-05	0.0243442	0.807163
miR-335	down	JAKMIP2	up	-0.392741	3.72756e-05	-0.144801	4.55775e-05	-0.130705	0.0305458	-0.392741	3.72756e-05	-0.0370634	0.710124
miR-335	down	CCL25	up	-0.39215	3.8385e-05	-0.0474598	0.183502	-0.0606618	0.317087	-0.39215	3.8385e-05	-0.103435	0.298464
miR-335	down	CHST6	up	-0.391912	3.88398e-05	-0.124052	0.000486547	-0.0644589	0.287686	-0.391912	3.88398e-05	-0.0702098	0.480981
miR-3127	up	TYRO3	down	-0.391667	3.93143e-05	0.00297409	0.933612	-0.0446739	0.461443	-0.391667	3.93143e-05	-0.109002	0.273069
miR-21	up	KLF9	down	-0.391569	3.95055e-05	0.141852	6.51495e-05	0.157419	0.00905096	-0.391569	3.95055e-05	0.155252	0.117368
miR-335	down	CTXN1	up	-0.39151	3.96216e-05	0.0157314	0.659468	0.0443784	0.464415	-0.39151	3.96216e-05	-0.0411486	0.679833
miR-193a	down	BUB1	up	-0.391273	4.00877e-05	-0.138292	9.93733e-05	-0.0668129	0.270407	-0.391273	4.00877e-05	-0.129499	0.192326
miR-96	up	FMNL2	down	-0.390547	4.15508e-05	-0.228425	8.94136e-11	-0.200898	0.000824569	-0.390547	4.15508e-05	-0.164881	0.0960416
miR-335	down	KLHL35	up	-0.390445	4.17597e-05	0.0436946	0.220792	0.0112859	0.85247	-0.390445	4.17597e-05	-0.124691	0.209501
miR-335	down	DOPEY2	up	-0.390375	4.19048e-05	-0.0131391	0.712852	-0.0621228	0.30555	-0.390375	4.19048e-05	0.150708	0.128625
miR-96	up	RECK	down	-0.389736	4.32434e-05	-0.325317	7.40845e-21	-0.250286	2.77822e-05	-0.389736	4.32434e-05	-0.162019	0.102035
miR-584	down	FOXA1	up	-0.389621	4.34892e-05	-0.519826	1.09683e-55	-0.358519	9.85194e-10	-0.389621	4.34892e-05	-0.619586	3.00561e-12
miR-215	down	ZWINT	up	-0.388721	4.5454e-05	0.0499755	0.161323	0.000113868	0.998503	-0.388721	4.5454e-05	0.14633	0.140236
miR-335	down	WFIKKN1	up	-0.388083	4.68959e-05	0.0903439	0.0112248	0.0728128	0.229615	-0.388083	4.68959e-05	0.156271	0.114952
miR-335	down	SCGB2A2	up	-0.387927	4.72544e-05	0.0159257	0.655532	0.0109277	0.857102	-0.387927	4.72544e-05	0.069941	0.482666
miR-143	down	GINS4	up	-0.387795	4.75599e-05	-0.144997	4.44939e-05	-0.179432	0.00287512	-0.387795	4.75599e-05	-0.0387156	0.697816
miR-182	up	MITF	down	-0.387056	4.93069e-05	-0.156142	1.08062e-05	-0.108544	0.0728435	-0.387056	4.93069e-05	-0.0733166	0.461735
miR-335	down	KLHL17	up	-0.386726	5.0107e-05	0.0504672	0.157235	0.0768931	0.204488	-0.386726	5.0107e-05	-0.0203311	0.838478
miR-140	down	RACGAP1	up	-0.385831	5.23356e-05	-0.288694	1.42581e-16	-0.3659	4.18427e-10	-0.385831	5.23356e-05	-0.306587	0.00163402
miR-106a	up	KCNMB1	down	-0.385481	5.32313e-05	-0.0969605	0.00648538	-0.0494252	0.415135	-0.385481	5.32313e-05	-0.0793632	0.425523
miR-6716	down	KCNK1	up	-0.385387	5.34759e-05	-0.0241177	0.499289	0.0514433	0.396323	-0.385387	5.34759e-05	-0.0388603	0.696741
miR-335	down	UBD	up	-0.385059	5.43333e-05	-0.0104888	0.768919	-0.025274	0.677035	-0.385059	5.43333e-05	-0.0726762	0.465668
miR-139	down	CHEK1	up	-0.38442	5.6039e-05	-0.42095	3.80909e-35	-0.348631	2.99966e-09	-0.38442	5.6039e-05	-0.366723	0.000138942
miR-21	up	TLR4	down	-0.383993	5.72079e-05	0.126868	0.000359884	0.0588501	0.331782	-0.383993	5.72079e-05	0.114197	0.250726
miR-215	down	TRIP13	up	-0.383878	5.75238e-05	0.0286733	0.421816	0.0522963	0.388528	-0.383878	5.75238e-05	0.151648	0.126231
miR-503	up	TMEM100	down	-0.383807	5.77232e-05	-0.0477765	0.180592	-0.0355022	0.558437	-0.383807	5.77232e-05	0.167922	0.0899841
miR-96	up	MITF	down	-0.383391	5.88926e-05	-0.224827	1.78256e-10	-0.275969	3.52488e-06	-0.383391	5.88926e-05	-0.191802	0.0522726
miR-206	down	CERS2	up	-0.382864	6.04053e-05	-0.169187	1.8132e-06	-0.0524692	0.386959	-0.382864	6.04053e-05	-0.107971	0.277658
miR-511	down	OTX1	up	-0.382375	6.1842e-05	0.0109081	0.75996	0.0853209	0.159005	-0.382375	6.1842e-05	0.111217	0.263386
miR-18a	up	PTCHD1	down	-0.381868	6.33641e-05	0.410537	2.37645e-33	0.321919	5.03384e-08	-0.381868	6.33641e-05	0.294415	0.00253839
miR-335	down	SRPK3	up	-0.38185	6.34203e-05	-0.0490766	0.169003	-0.042589	0.482636	-0.38185	6.34203e-05	-0.153274	0.122171
miR-335	down	TMEM190	up	-0.380334	6.8186e-05	0.0202523	0.570508	0.0449026	0.459151	-0.380334	6.8186e-05	0.0313045	0.753593
miR-183	up	LAMA2	down	-0.379736	7.01578e-05	-0.166081	2.80888e-06	-0.0990987	0.10165	-0.379736	7.01578e-05	-0.0603936	0.544514
miR-335	down	DNMT3B	up	-0.379148	7.21487e-05	0.0771019	0.0305595	0.146971	0.0148952	-0.379148	7.21487e-05	0.0391158	0.694846
miR-4728	up	RFTN2	down	-0.379017	7.26001e-05	-0.0312101	0.381914	0.0185233	0.760184	-0.379017	7.26001e-05	-0.0811141	0.41535
miR-215	down	CDC20	up	-0.37885	7.31784e-05	0.00783666	0.826261	0.0245948	0.685245	-0.37885	7.31784e-05	0.177587	0.0727161
miR-335	down	STX1A	up	-0.378078	7.5906e-05	0.0289792	0.41688	0.0879172	0.146655	-0.378078	7.5906e-05	0.0195094	0.844923
miR-145	down	MMP1	up	-0.377406	7.83565e-05	-0.0486232	0.172981	0.0777585	0.199425	-0.377406	7.83565e-05	0.0641801	0.519529
miR-21	up	RECK	down	-0.37736	7.85277e-05	0.221113	3.58928e-10	0.22247	0.000205368	-0.37736	7.85277e-05	0.190133	0.0543954
miR-143	down	MMP13	up	-0.377222	7.90411e-05	0.0608026	0.0882705	0.0514626	0.396145	-0.377222	7.90411e-05	0.0756329	0.447667
miR-155	up	DMD	down	-0.376706	8.09882e-05	0.149273	2.61605e-05	0.091943	0.128967	-0.376706	8.09882e-05	0.0405687	0.684103
miR-140	down	TTLL12	up	-0.376694	8.1035e-05	-0.0350806	0.32567	-0.137092	0.0232298	-0.376694	8.1035e-05	-0.07437	0.455307
miR-155	up	KANK2	down	-0.375758	8.46837e-05	-0.226173	1.37871e-10	-0.102727	0.0896679	-0.375758	8.46837e-05	-0.207067	0.0358474
miR-96	up	ZEB1	down	-0.375606	8.5291e-05	-0.212805	1.64335e-09	-0.224411	0.000179991	-0.375606	8.5291e-05	-0.207757	0.0352214
miR-335	down	ABAT	up	-0.375367	8.62536e-05	0.0505635	0.156443	-0.0326801	0.590147	-0.375367	8.62536e-05	0.163552	0.0987897
miR-335	down	EFNA1	up	-0.375085	8.74055e-05	-0.0537435	0.131968	-0.127637	0.0347083	-0.375085	8.74055e-05	-0.00577413	0.953839
miR-215	down	SLC16A6	up	-0.375059	8.75116e-05	0.0218575	0.540353	0.0208087	0.731668	-0.375059	8.75116e-05	0.0809156	0.416496
miR-106a	up	PRNP	down	-0.374588	8.94656e-05	-0.0420464	0.238719	-0.0499377	0.410308	-0.374588	8.94656e-05	-0.0871355	0.381464
miR-155	up	GPAM	down	-0.374359	9.04264e-05	-0.0897348	0.011787	-0.057073	0.346616	-0.374359	9.04264e-05	-0.193428	0.0502715
miR-155	up	CLMP	down	-0.373854	9.25871e-05	0.194081	4.0587e-08	0.122466	0.0428125	-0.373854	9.25871e-05	0.0842184	0.397666
miR-335	down	ERMP1	up	-0.373045	9.61492e-05	0.061634	0.0839978	0.00685604	0.910054	-0.373045	9.61492e-05	0.189577	0.0551176
miR-21	up	TGFBR2	down	-0.372976	9.64587e-05	0.115848	0.00113099	0.124723	0.039097	-0.372976	9.64587e-05	0.106222	0.285563
miR-551b	down	BUB1	up	-0.372876	9.69106e-05	0.0563144	0.114437	0.144796	0.0164624	-0.372876	9.69106e-05	0.0416257	0.676327
miR-143	down	DEPDC1B	up	-0.372827	9.71321e-05	-0.211324	2.14138e-09	-0.221778	0.000215191	-0.372827	9.71321e-05	-0.251048	0.0105317
miR-584	down	PRLR	up	-0.372691	9.77481e-05	-0.28847	1.50783e-16	-0.275038	3.81327e-06	-0.372691	9.77481e-05	-0.315499	0.00116951
miR-215	down	ENTPD7	up	-0.372146	0.000100257	0.0507874	0.154614	-0.0236908	0.69623	-0.372146	0.000100257	-0.12415	0.211503
miR-215	down	CENPF	up	-0.371867	0.000101561	0.053119	0.136525	0.0662266	0.274643	-0.371867	0.000101561	0.124338	0.210804
miR-215	down	ERMP1	up	-0.371854	0.000101622	-0.00585099	0.869825	-0.041252	0.496498	-0.371854	0.000101622	-0.259138	0.00821305
miR-21	up	PLD1	down	-0.371606	0.000102798	-0.00105152	0.976504	0.0691423	0.254019	-0.371606	0.000102798	0.139911	0.15867
miR-215	down	RAD54B	up	-0.371067	0.000105401	-0.0125772	0.724622	-0.0222012	0.714469	-0.371067	0.000105401	-0.0275174	0.782613
miR-155	up	RETSAT	down	-0.370952	0.00010596	-0.210276	2.57979e-09	-0.0323569	0.59383	-0.370952	0.00010596	-0.157452	0.112199
miR-155	up	NR3C1	down	-0.370384	0.000108782	0.178229	4.84536e-07	0.0947551	0.117623	-0.370384	0.000108782	-0.00605726	0.951578
miR-215	down	DTL	up	-0.370246	0.000109476	0.0589041	0.0986827	0.0540816	0.372516	-0.370246	0.000109476	0.160241	0.105902
miR-335	down	SLC30A2	up	-0.370028	0.000110582	-0.0262419	0.462258	-0.0216813	0.720874	-0.370028	0.000110582	0.119223	0.230333
miR-155	up	EGFR	down	-0.369522	0.000113194	0.220069	4.35985e-10	0.150313	0.0127413	-0.369522	0.000113194	0.246196	0.0121817
miR-133b	down	ZMAT4	up	-0.36881	0.000116961	0.00509537	0.886514	-0.0285809	0.637618	-0.36881	0.000116961	0.11593	0.243557
miR-193a	down	AURKA	up	-0.36843	0.00011902	-0.118248	0.000888421	0.0349646	0.564414	-0.36843	0.00011902	-0.0218054	0.826942
miR-18a	up	KY	down	-0.36838	0.000119295	0.0126311	0.723491	-0.120715	0.0458953	-0.36838	0.000119295	-0.113148	0.255134
miR-193a	down	SHISA9	up	-0.368127	0.000120685	0.0588066	0.0992428	0.0281854	0.642282	-0.368127	0.000120685	-0.00149916	0.988009
miR-182	up	TTC28	down	-0.367718	0.000122972	0.00609981	0.864341	-0.0249168	0.681348	-0.367718	0.000122972	0.0915651	0.357637
miR-551b	down	DLX2	up	-0.367082	0.000126602	-0.0135543	0.704198	-0.00849254	0.88871	-0.367082	0.000126602	-0.217264	0.0274902
miR-335	down	FRMPD3	up	-0.366737	0.000128611	-0.055172	0.121987	-0.0342943	0.571909	-0.366737	0.000128611	-0.0630932	0.526641
miR-335	down	CA12	up	-0.364451	0.000142698	0.146239	3.81908e-05	0.0488999	0.420117	-0.364451	0.000142698	0.300281	0.00205767
miR-877	up	RCAN1	down	-0.364297	0.000143694	0.0731057	0.0403296	-0.0637436	0.293079	-0.364297	0.000143694	0.0839441	0.399211
miR-215	down	DLGAP5	up	-0.363577	0.000148451	0.0517552	0.146897	0.0707431	0.243164	-0.363577	0.000148451	0.18298	0.0643092
miR-145	down	MUC1	up	-0.362932	0.000152837	0.14396	5.0499e-05	0.03129	0.606064	-0.362932	0.000152837	0.0725429	0.466488
miR-183	up	DNAJB4	down	-0.36265	0.000154791	-0.216787	7.98623e-10	-0.0659256	0.276835	-0.36265	0.000154791	-0.187861	0.0573986
miR-21	up	LIFR	down	-0.361748	0.000161199	-0.0337759	0.343997	-0.0403262	0.50622	-0.361748	0.000161199	0.111314	0.262966
miR-215	down	TROAP	up	-0.361623	0.000162109	0.00734984	0.836897	0.034024	0.574944	-0.361623	0.000162109	0.167132	0.0915269
miR-365b	down	OIP5	up	-0.361604	0.000162246	-0.0799913	0.0248281	0.0875424	0.148392	-0.361604	0.000162246	-0.0864681	0.385135
miR-365a	down	OIP5	up	-0.361185	0.00016532	-0.0798822	0.0250263	0.0907981	0.133821	-0.361185	0.00016532	-0.0799322	0.422201
miR-378a	down	BBC3	up	-0.359241	0.000180321	-0.0843085	0.0180006	-0.0892015	0.140822	-0.359241	0.000180321	-0.197445	0.0455953
miR-21	up	MEF2C	down	-0.358912	0.000182983	0.0110175	0.757627	0.0402993	0.506503	-0.358912	0.000182983	0.0311957	0.754422
miR-335	down	DLX3	up	-0.358876	0.000183275	-0.00581055	0.870716	-0.0636875	0.293505	-0.358876	0.000183275	0.0580461	0.560293
miR-203a	up	SMAD9	down	-0.357747	0.000192693	0.0224715	0.529033	0.064665	0.286143	-0.357747	0.000192693	-0.100517	0.312376
miR-335	down	HES2	up	-0.357082	0.000198451	-0.0623206	0.0805974	-0.184048	0.00222235	-0.357082	0.000198451	-0.210902	0.0324829
miR-183	up	ADAMTS9	down	-0.356832	0.000200662	-0.219647	4.71547e-10	-0.158494	0.00858414	-0.356832	0.000200662	-0.158826	0.109062
miR-335	down	MYBPH	up	-0.356112	0.000207133	-0.0878744	0.0136616	0.0129804	0.830632	-0.356112	0.000207133	0.0412499	0.679088
miR-155	up	HHIP	down	-0.354333	0.000223982	-0.130066	0.000253635	-0.0391957	0.518223	-0.354333	0.000223982	-0.152956	0.122957
miR-182	up	PPM1L	down	-0.353783	0.000229438	-0.0568437	0.111066	-0.103754	0.0864892	-0.353783	0.000229438	0.0659074	0.508328
miR-335	down	NLRP2	up	-0.353749	0.000229776	0.0374413	0.294151	0.0557787	0.357679	-0.353749	0.000229776	0.0803842	0.419573
miR-155	up	2018-03-01	down	-0.352723	0.000240311	-0.00323372	0.927832	0.020585	0.734444	-0.352723	0.000240311	-0.144883	0.144243
miR-215	down	SKA1	up	-0.352587	0.00024174	0.0116852	0.743441	0.0628632	0.299811	-0.352587	0.00024174	0.167088	0.0916135
miR-192	up	ID1	down	-0.352489	0.00024277	-0.259449	1.42618e-13	-0.211162	0.000432948	-0.352489	0.00024277	0.036107	0.717283
miR-378a	down	NPHS1	up	-0.351996	0.000248039	0.108949	0.00220849	0.122446	0.0428464	-0.351996	0.000248039	0.119913	0.227629
miR-215	down	GPR19	up	-0.35094	0.000259665	0.0569517	0.110388	0.0203122	0.737833	-0.35094	0.000259665	0.128299	0.196514
miR-378a	down	CHST6	up	-0.350881	0.000260333	0.23495	2.48328e-11	0.176274	0.00341724	-0.350881	0.000260333	0.230376	0.0192263
miR-4728	up	PPM1L	down	-0.350812	0.000261109	0.0301119	0.398896	0.0656957	0.278517	-0.350812	0.000261109	0.0980959	0.324234
miR-335	down	ADAM8	up	-0.35059	0.00026364	-0.153945	1.4397e-05	-0.171673	0.00437333	-0.35059	0.00026364	-0.0360345	0.717827
miR-183	up	KLHL31	down	-0.348087	0.000293675	-0.059853	0.0933621	-0.0140728	0.816621	-0.348087	0.000293675	-0.0213255	0.830693
miR-155	up	MEST	down	-0.347808	0.000297205	-0.0136779	0.70163	0.0190587	0.753472	-0.347808	0.000297205	-0.192203	0.0517727
miR-335	down	LRG1	up	-0.347154	0.000305652	0.121081	0.00066435	-0.103148	0.0883533	-0.347154	0.000305652	0.0696187	0.484691
miR-615	up	BACH2	down	-0.346533	0.000313878	0.00173549	0.961231	-0.112835	0.0621566	-0.346533	0.000313878	-0.0402203	0.686674
miR-215	down	NEIL3	up	-0.345013	0.000334858	0.0324896	0.362696	0.0595031	0.326435	-0.345013	0.000334858	0.101135	0.309396
miR-493	up	MYCBP2	down	-0.344904	0.000336418	0.221662	3.23885e-10	0.0141056	0.816201	-0.344904	0.000336418	0.18888	0.0560351
miR-96	up	MYRIP	down	-0.344566	0.000341283	0.0540848	0.129528	-0.035691	0.556346	-0.344566	0.000341283	0.072805	0.464875
miR-200a	up	CPS1	down	-0.343595	0.000355616	-0.110373	0.00192925	-0.0800524	0.186446	-0.343595	0.000355616	-0.101976	0.305368
miR-200b	up	CPS1	down	-0.343377	0.000358903	-0.136192	0.000126872	-0.0699423	0.248553	-0.343377	0.000358903	-0.0407986	0.682409
miR-6510	down	TPM3	up	-0.341096	0.000395074	-0.1415	6.79579e-05	-0.223955	0.000185669	-0.341096	0.000395074	-0.137994	0.164512
miR-503	up	KANK1	down	-0.340756	0.000400741	-0.0654047	0.0666717	-0.112993	0.0617899	-0.340756	0.000400741	-0.0573707	0.564873
miR-675	down	TK1	up	-0.340647	0.000402571	-0.190548	7.18594e-08	-0.0663692	0.273608	-0.340647	0.000402571	-0.258863	0.00828396
miR-21	up	SATB1	down	-0.339937	0.000414707	-0.0243793	0.494645	-0.026527	0.661989	-0.339937	0.000414707	-0.249991	0.0108734
miR-6510	down	GAS2L3	up	-0.338859	0.000433782	-0.0713806	0.0453011	-0.170542	0.0046426	-0.338859	0.000433782	-0.168515	0.0888388
miR-215	down	C1orf112	up	-0.337363	0.000461578	0.0233812	0.512485	0.0479173	0.429528	-0.337363	0.000461578	0.0664096	0.505095
miR-335	down	CNIH2	up	-0.337362	0.000461595	-0.0556577	0.118731	0.0129317	0.831259	-0.337362	0.000461595	-0.127363	0.199828
miR-18a	up	SMYD1	down	-0.336877	0.000470957	0.0875313	0.0140347	-0.0856894	0.157206	-0.336877	0.000470957	0.0595655	0.550056
miR-148b	up	EOGT	down	-0.336871	0.000471075	-0.266473	2.92741e-14	-0.29815	4.96921e-07	-0.336871	0.000471075	-0.134291	0.176246
miR-335	down	PMAIP1	up	-0.336754	0.000473356	0.0195229	0.584469	-0.101153	0.0947183	-0.336754	0.000473356	-0.0780276	0.433378
miR-4746	up	GPR75	down	-0.336618	0.000476015	0.0441155	0.216373	-0.105385	0.0816306	-0.336618	0.000476015	-0.0997535	0.316085
miR-215	down	NMU	up	-0.336001	0.000488298	0.0216588	0.544043	0.0336463	0.579199	-0.336001	0.000488298	0.182039	0.0657159
miR-335	down	SLC16A6	up	-0.335931	0.000489721	0.121609	0.0006289	0.0379894	0.531192	-0.335931	0.000489721	0.252086	0.0102052
miR-335	down	MEIS3	up	-0.335215	0.000504357	0.0253026	0.478441	-0.0272857	0.652943	-0.335215	0.000504357	0.0920759	0.35495
miR-215	down	ECT2	up	-0.335091	0.000506934	0.0910661	0.0105891	0.0461059	0.447192	-0.335091	0.000506934	0.116625	0.240723
miR-206	down	CCND1	up	-0.334608	0.000517092	-0.200214	1.46831e-08	-0.0775172	0.200827	-0.334608	0.000517092	-0.108414	0.275683
miR-215	down	DEPDC1	up	-0.333524	0.000540581	0.0575968	0.106405	0.0346679	0.567725	-0.333524	0.000540581	0.140621	0.156548
miR-4728	up	CPM	down	-0.333463	0.000541926	-0.0875019	0.0140671	-0.0766596	0.20587	-0.333463	0.000541926	-0.1918	0.052275
miR-3065	up	CTNNA3	down	-0.332497	0.000563712	0.0298382	0.403199	-0.0176406	0.771288	-0.332497	0.000563712	-0.0661763	0.506595
miR-335	down	BFSP2	up	-0.332017	0.000574849	0.0271486	0.446931	0.0531451	0.380864	-0.332017	0.000574849	0.0701435	0.481396
miR-139	down	PAGR1	up	-0.331786	0.000580264	0.0305596	0.391919	-0.0203994	0.73675	-0.331786	0.000580264	0.0241439	0.808719
miR-335	down	TSTD1	up	-0.331211	0.000593981	0.00747669	0.834123	0.020121	0.740212	-0.331211	0.000593981	-0.0843475	0.396941
miR-335	down	HOXB1	up	-0.330168	0.000619603	0.0202237	0.571053	-0.0628603	0.299833	-0.330168	0.000619603	0.0830349	0.404355
miR-335	down	CYP21A2	up	-0.329738	0.000630458	0.0428488	0.229867	0.0269869	0.656499	-0.329738	0.000630458	0.117795	0.236006
miR-155	up	EPB41L2	down	-0.329545	0.000635393	0.216401	8.5698e-10	0.138417	0.0219181	-0.329545	0.000635393	0.152715	0.123556
miR-203a	up	IL6	down	-0.329284	0.000642119	0.00621046	0.861905	-0.0208395	0.731286	-0.329284	0.000642119	-0.0456511	0.64703
miR-195	down	MKX	up	-0.329176	0.000644909	0.0291704	0.413811	0.0027489	0.963873	-0.329176	0.000644909	0.0515182	0.605285
miR-21	up	PKD2	down	-0.328545	0.000661495	0.136821	0.000117957	0.118561	0.0499391	-0.328545	0.000661495	0.0878004	0.377827
miR-140	down	CD3EAP	up	-0.328157	0.000671891	-0.1704	1.52498e-06	-0.242414	5.01422e-05	-0.328157	0.000671891	-0.200411	0.0423805
miR-145	down	ABHD17C	up	-0.327941	0.000677753	-0.0630677	0.077024	-0.108379	0.0732819	-0.327941	0.000677753	-0.0750042	0.451461
miR-335	down	KCNK9	up	-0.326895	0.000706753	0.0288851	0.418394	0.139848	0.0205745	-0.326895	0.000706753	0.0770066	0.439438
miR-497	down	CCNE1	up	-0.326493	0.000718178	-0.266547	2.87801e-14	-0.226296	0.000158174	-0.326493	0.000718178	-0.321933	0.000912735
miR-335	down	COL11A1	up	-0.326447	0.000719511	-0.188518	9.92779e-08	-0.138001	0.0223233	-0.326447	0.000719511	-0.187994	0.0572187
miR-335	down	CLIC3	up	-0.326324	0.000723056	-0.120873	0.00067886	-0.121762	0.0440306	-0.326324	0.000723056	-0.218487	0.0266095
miR-454	up	PRNP	down	-0.325641	0.000743012	-0.178569	4.60465e-07	-0.217238	0.000291369	-0.325641	0.000743012	-0.113526	0.253539
miR-675	down	KCNK6	up	-0.324899	0.000765255	0.00577964	0.871398	-0.0336526	0.579127	-0.324899	0.000765255	-0.0725999	0.466137
miR-877	up	OVCH2	down	-0.324759	0.000769537	-0.173379	9.91744e-07	-0.243691	4.56223e-05	-0.324759	0.000769537	-0.0971027	0.32918
miR-195	down	CCNE1	up	-0.324677	0.000772039	-0.39004	5.3609e-30	-0.31998	6.11368e-08	-0.324677	0.000772039	-0.459553	1.04464e-06
miR-335	down	MEPE	up	-0.324598	0.000774462	-0.0454352	0.20293	-0.00346607	0.954456	-0.324598	0.000774462	-0.194606	0.048861
miR-342	up	TMEM236	down	-0.324136	0.000788784	-0.143002	5.67255e-05	-0.124182	0.0399621	-0.324136	0.000788784	0.0013137	0.989492
miR-335	down	NKAIN1	up	-0.323212	0.000818131	0.102795	0.00389139	0.113161	0.061401	-0.323212	0.000818131	0.105701	0.287945
miR-155	up	METTL7A	down	-0.323181	0.000819128	0.0683435	0.0553052	0.0237531	0.695471	-0.323181	0.000819128	0.17511	0.0768638
miR-335	down	CCL20	up	-0.322495	0.000841585	-0.138914	9.23686e-05	-0.00364819	0.952066	-0.322495	0.000841585	-0.0859831	0.387817
miR-4728	up	IGF1	down	-0.322315	0.000847569	-0.115641	0.00115454	-0.137744	0.022576	-0.322315	0.000847569	-0.160321	0.105726
miR-140	down	LIN28B	up	-0.321502	0.00087512	0.0586893	0.0999198	-0.119865	0.0474575	-0.321502	0.00087512	0.215969	0.0284503
miR-32	up	NCOA7	down	-0.321338	0.000880769	0.0332039	0.352236	0.0631444	0.29765	-0.321338	0.000880769	0.126905	0.201463
miR-10b	down	PLK1	up	-0.320126	0.000923574	-0.455296	1.56821e-41	-0.42597	1.66773e-13	-0.320126	0.000923574	-0.365438	0.000147235
miR-215	down	FEN1	up	-0.320095	0.000924698	0.0228508	0.5221	-0.00675467	0.911379	-0.320095	0.000924698	0.163628	0.098631
miR-155	up	LPL	down	-0.317849	0.00100914	0.0556083	0.119059	0.0423892	0.484695	-0.317849	0.00100914	-0.044719	0.653768
miR-335	down	CACNA1E	up	-0.31755	0.00102093	-0.00158319	0.964631	-0.0577783	0.340678	-0.31755	0.00102093	0.0171892	0.863174
miR-133b	down	EMID1	up	-0.317477	0.0010238	0.000449913	0.989946	-0.0208167	0.731569	-0.317477	0.0010238	-0.0715355	0.472716
miR-335	down	ART3	up	-0.317317	0.00103016	-0.155525	1.17179e-05	-0.111923	0.0643138	-0.317317	0.00103016	-0.216437	0.0281001
miR-335	down	OTOR	up	-0.316679	0.00105588	0.0354691	0.320338	0.00270659	0.964428	-0.316679	0.00105588	0.165505	0.0947746
miR-155	up	MCAM	down	-0.316569	0.00106038	-0.0210751	0.554951	0.071193	0.240172	-0.316569	0.00106038	0.0754316	0.44888
miR-18a	up	DAB2IP	down	-0.31641	0.00106691	0.086714	0.0149598	0.0607769	0.316168	-0.31641	0.00106691	0.198492	0.0444385
miR-378a	down	DCTPP1	up	-0.314286	0.00115767	-0.0105343	0.767946	-0.0586643	0.333313	-0.314286	0.00115767	-0.0575789	0.56346
miR-335	down	BIRC5	up	-0.314179	0.00116243	-0.0191127	0.592391	0.0500099	0.409631	-0.314179	0.00116243	-0.0515583	0.605004
miR-335	down	IYD	up	-0.313646	0.00118636	0.0395237	0.2681	0.0679166	0.262554	-0.313646	0.00118636	0.0982885	0.32328
miR-215	down	RMI1	up	-0.31346	0.00119485	0.164223	3.63591e-06	0.0619107	0.307207	-0.31346	0.00119485	0.0753946	0.449103
miR-335	down	CHRNB4	up	-0.313362	0.00119933	-0.0651978	0.0675398	0.141267	0.0193129	-0.313362	0.00119933	0.00471362	0.96231
miR-195	down	RELT	up	-0.313204	0.00120656	-0.190874	6.81996e-08	-0.129463	0.0321757	-0.313204	0.00120656	-0.13556	0.172159
miR-133b	down	HCN4	up	-0.313017	0.00121522	0.000961	0.978526	-0.0168746	0.780961	-0.313017	0.00121522	-0.0722204	0.468477
miR-3065	up	C2orf71	down	-0.312653	0.00123217	-0.0876874	0.0138638	-0.00119018	0.984354	-0.312653	0.00123217	0.0380447	0.702805
miR-187	up	FOS	down	-0.312542	0.00123742	-0.0774607	0.0297911	-0.0182306	0.76386	-0.312542	0.00123742	0.0321963	0.746807
miR-891a	down	ZNF730	up	-0.312431	0.00124266	-0.0108812	0.760534	0.0258175	0.670492	-0.312431	0.00124266	0.011633	0.907157
miR-4728	up	FERMT2	down	-0.311753	0.00127511	0.0126241	0.723638	0.110131	0.0687292	-0.311753	0.00127511	0.0733055	0.461803
miR-203b	up	TMOD2	down	-0.311684	0.00127842	-0.0560914	0.115881	-0.0786596	0.19425	-0.311684	0.00127842	-0.21685	0.0277944
miR-335	down	LYZL2	up	-0.311171	0.00130354	0.0617103	0.0836146	0.110521	0.0677462	-0.311171	0.00130354	0.0115442	0.907863
miR-378a	down	RAD51	up	-0.310801	0.00132194	0.205615	5.8366e-09	0.106546	0.0783064	-0.310801	0.00132194	0.127363	0.199825
miR-891a	down	RAD51	up	-0.310513	0.00133641	0.0629702	0.077483	0.0931194	0.124123	-0.310513	0.00133641	0.0937507	0.346228
miR-140	down	CDCA8	up	-0.310395	0.0013424	-0.15707	9.5614e-06	-0.337231	1.03293e-08	-0.310395	0.0013424	-0.183923	0.0629227
miR-503	up	TLL1	down	-0.310067	0.00135914	-0.0199917	0.575479	-0.0569213	0.347901	-0.310067	0.00135914	0.165902	0.0939727
miR-335	down	REPS2	up	-0.310051	0.00135998	0.0399497	0.262972	-0.0596433	0.325295	-0.310051	0.00135998	0.100018	0.314797
miR-130b	up	RIMS3	down	-0.309632	0.00138165	0.1407	7.47675e-05	0.0369996	0.541954	-0.309632	0.00138165	0.126955	0.201283
miR-204	down	TREM1	up	-0.309539	0.00138649	-0.234796	2.56051e-11	-0.27467	3.93343e-06	-0.309539	0.00138649	-0.351948	0.000266715
miR-205	down	ATP5EP2	up	-0.309497	0.00138866	-0.0605696	0.0894987	-0.0703027	0.246117	-0.309497	0.00138866	-0.228882	0.0200447
miR-375	up	MAP3K8	down	-0.308718	0.00142997	-0.274085	4.98803e-15	-0.262543	1.06532e-05	-0.308718	0.00142997	-0.509592	3.85259e-08
miR-335	down	AGXT2	up	-0.308602	0.00143622	0.0688	0.0536937	0.0838466	0.166358	-0.308602	0.00143622	-0.137869	0.1649
miR-4728	up	ARHGAP31	down	-0.308445	0.00144469	-0.0937757	0.00847939	-0.025653	0.67247	-0.308445	0.00144469	-0.0455622	0.647671
miR-335	down	SPIB	up	-0.308244	0.00145563	-0.0104732	0.769254	0.0120149	0.843061	-0.308244	0.00145563	-0.0694014	0.486058
miR-342	up	CYP11A1	down	-0.307787	0.00148081	-0.189094	9.0606e-08	-0.10001	0.0985268	-0.307787	0.00148081	-0.11407	0.251258
miR-940	up	EIF3L	down	-0.307237	0.00151163	-0.209966	2.7254e-09	-0.178078	0.00309718	-0.307237	0.00151163	-0.154025	0.120329
miR-335	down	XIRP1	up	-0.306912	0.00153005	-0.0711699	0.0459421	0.0225975	0.7096	-0.306912	0.00153005	-0.117581	0.236865
let-7c	down	IGF2BP3	up	-0.306592	0.00154848	-0.0994059	0.00525182	-0.0210802	0.728304	-0.306592	0.00154848	-0.22181	0.0243361
miR-503	up	RPS6KA3	down	-0.306315	0.0015645	0.0841313	0.0182447	0.00337341	0.955673	-0.306315	0.0015645	0.101968	0.30541
miR-940	up	ATP13A4	down	-0.306307	0.00156497	-0.0956711	0.00723546	-0.158202	0.00870895	-0.306307	0.00156497	-0.0870183	0.382107
miR-18a	up	SYNM	down	-0.30618	0.00157243	0.251801	7.58283e-13	0.0760132	0.209731	-0.30618	0.00157243	0.210025	0.0332276
miR-215	down	NUF2	up	-0.306025	0.00158153	0.0218552	0.540396	0.0578936	0.339714	-0.306025	0.00158153	0.15293	0.123021
miR-335	down	NCAM2	up	-0.305546	0.00160994	0.0986405	0.00561303	0.025525	0.67401	-0.305546	0.00160994	0.205432	0.0373681
miR-183	up	CRIM1	down	-0.305449	0.00161579	-0.092673	0.00928794	-0.13253	0.028277	-0.305449	0.00161579	-0.167495	0.0908149
miR-6716	down	TMEM145	up	-0.305207	0.00163037	0.0323005	0.365498	-0.0449187	0.458989	-0.305207	0.00163037	0.00857988	0.931454
miR-155	up	PCDH9	down	-0.304816	0.00165419	0.0837663	0.0187565	0.0357939	0.555207	-0.304816	0.00165419	-0.00871159	0.930405
miR-215	down	RAD51	up	-0.304719	0.00166013	0.0158991	0.65607	0.0305328	0.614813	-0.304719	0.00166013	0.165223	0.0953452
miR-140	down	FEN1	up	-0.304656	0.00166402	-0.136761	0.000118786	-0.236304	7.82404e-05	-0.304656	0.00166402	-0.262095	0.00748566
miR-335	down	SLC12A3	up	-0.304628	0.00166573	0.0484967	0.174102	0.178904	0.00295994	-0.304628	0.00166573	-0.014674	0.883041
miR-181b-2	up	FAM124A	down	-0.303387	0.00174396	-0.0118963	0.738972	0.0336523	0.579131	-0.303387	0.00174396	-0.177968	0.0720946
miR-215	down	CIT	up	-0.302438	0.00180597	0.0573018	0.108212	0.0420653	0.488041	-0.302438	0.00180597	0.148594	0.134136
miR-335	down	PDIA4	up	-0.301934	0.0018397	0.0038148	0.914909	0.0404939	0.504451	-0.301934	0.0018397	-0.119632	0.228729
miR-140	down	CBX8	up	-0.301933	0.00183975	-0.0442339	0.215141	-0.00768569	0.899224	-0.301933	0.00183975	0.00422616	0.966206
miR-135b	up	MPL	down	-0.301395	0.00187645	0.290313	9.48878e-17	0.271483	5.13476e-06	-0.301395	0.00187645	0.400658	2.74451e-05
miR-4732	down	MIOX	up	-0.301264	0.0018855	-0.0347597	0.330117	-0.044483	0.463363	-0.301264	0.0018855	-0.206577	0.0362979
miR-96	up	ALPK3	down	-0.301189	0.00189066	-0.0731898	0.0400995	-0.0401579	0.507997	-0.301189	0.00189066	0.0933	0.348562
miR-155	up	CFL2	down	-0.301093	0.00189729	0.0410549	0.249984	0.0548394	0.365845	-0.301093	0.00189729	0.00289827	0.97682
miR-454	up	RCAN1	down	-0.300737	0.00192215	-0.111729	0.00169381	-0.253911	2.10288e-05	-0.300737	0.00192215	-0.174539	0.0778462
miR-503	up	CREBRF	down	-0.300737	0.00192219	-0.133601	0.000170667	-0.154427	0.01047	-0.300737	0.00192219	-0.0252943	0.799792
miR-4728	up	ACAA2	down	-0.300065	0.00196992	-0.0469693	0.188078	-0.0259515	0.668883	-0.300065	0.00196992	-0.256261	0.00898007
miR-18a	up	ID4	down	-0.298424	0.002091	0.225235	1.64922e-10	0.135891	0.0244774	-0.298424	0.002091	0.0926308	0.352045
miR-3614	up	GPR75	down	-0.298403	0.00209259	-0.0663474	0.0628334	-0.0827615	0.17193	-0.298403	0.00209259	-0.0936136	0.346937
miR-4728	up	IRAK3	down	-0.297466	0.00216482	-0.12222	0.000590034	-0.0202828	0.738199	-0.297466	0.00216482	-0.276988	0.00461915
miR-155	up	CD36	down	-0.29732	0.00217628	0.0275616	0.440044	0.0761568	0.208869	-0.29732	0.00217628	0.0794981	0.424734
miR-184	up	LIFR	down	-0.296747	0.00222169	0.0260198	0.466056	-0.0253694	0.675884	-0.296747	0.00222169	0.103864	0.296455
miR-92b	up	LONRF3	down	-0.296691	0.00222617	0.0332735	0.351227	0.069999	0.248169	-0.296691	0.00222617	0.156219	0.115075
miR-335	down	COLEC10	up	-0.296654	0.00222919	-0.00160384	0.96417	0.000328467	0.995682	-0.296654	0.00222919	0.0396124	0.691167
miR-192	up	LRRC8C	down	-0.296502	0.0022414	-0.0918427	0.00994128	-0.0544866	0.368942	-0.296502	0.0022414	-0.0545759	0.584012
let-7c	down	EN2	up	-0.296454	0.0022453	0.00945862	0.791062	0.123415	0.0412165	-0.296454	0.0022453	0.00964386	0.922979
miR-511	down	KCNJ3	up	-0.29643	0.00224718	-0.136924	0.000116562	-0.122543	0.0426815	-0.29643	0.00224718	-0.208648	0.0344261
miR-335	down	GRIK4	up	-0.295993	0.00228281	0.0514915	0.14897	0.0156962	0.795908	-0.295993	0.00228281	-0.0338748	0.734087
miR-335	down	GBX2	up	-0.295615	0.00231405	-0.130433	0.000243523	-0.0852594	0.159307	-0.295615	0.00231405	-0.265772	0.00666067
miR-342	up	KLF8	down	-0.295567	0.00231801	-0.0972263	0.00633969	-0.175596	0.00354508	-0.295567	0.00231801	0.00283272	0.977345
miR-215	down	HMMR	up	-0.295175	0.00235086	0.0833627	0.0193369	0.0505753	0.404351	-0.295175	0.00235086	0.0855719	0.390099
miR-335	down	SYT1	up	-0.294523	0.00240635	0.124658	0.000456238	0.0889263	0.142057	-0.294523	0.00240635	0.0774418	0.436849
miR-944	down	DSN1	up	-0.294346	0.00242165	-0.192743	5.04519e-08	-0.219469	0.000251251	-0.294346	0.00242165	-0.105767	0.287643
miR-192	up	RBP7	down	-0.294276	0.00242769	-0.191359	6.30883e-08	-0.142033	0.0186603	-0.294276	0.00242769	0.0387679	0.697427
miR-148b	up	KCNJ16	down	-0.294125	0.00244083	-0.230892	5.53361e-11	-0.343923	5.02875e-09	-0.294125	0.00244083	-0.264335	0.0069728
miR-215	down	POLQ	up	-0.293388	0.00250591	0.0447146	0.210193	0.0798617	0.187501	-0.293388	0.00250591	0.0455541	0.647729
miR-335	down	FGD3	up	-0.292516	0.00258477	0.00898483	0.801303	-0.0586192	0.333686	-0.292516	0.00258477	-0.0817502	0.41169
miR-215	down	CDC7	up	-0.292311	0.00260369	0.0594541	0.0955697	0.0233076	0.700906	-0.292311	0.00260369	0.00801731	0.935939
miR-206	down	ESR1	up	-0.291924	0.00263967	-0.240509	8.08635e-12	-0.112821	0.0621905	-0.291924	0.00263967	-0.0483857	0.627426
miR-335	down	UGT2B17	up	-0.291876	0.00264418	0.0129876	0.716019	-0.0843849	0.163644	-0.291876	0.00264418	0.0130847	0.895633
miR-182	up	CREB5	down	-0.291664	0.00266405	-0.306701	1.32746e-18	-0.145944	0.0156182	-0.291664	0.00266405	-0.0862143	0.386537
miR-215	down	HJURP	up	-0.291421	0.00268708	0.0330252	0.354835	0.0901137	0.136789	-0.291421	0.00268708	0.196692	0.0464429
miR-335	down	DHCR7	up	-0.290733	0.00275322	-0.0974475	0.00622072	-0.119849	0.0474859	-0.290733	0.00275322	-0.21792	0.027015
miR-335	down	DYDC1	up	-0.290268	0.00279876	-0.0179531	0.615043	-0.0953146	0.115462	-0.290268	0.00279876	-0.0280629	0.778413
miR-96	up	PRDM16	down	-0.289763	0.00284891	-0.136715	0.000119416	-0.0382037	0.528876	-0.289763	0.00284891	-0.121892	0.219993
miR-187	up	SLC19A3	down	-0.289573	0.00286799	0.0248091	0.487065	0.00774098	0.898503	-0.289573	0.00286799	0.0204847	0.837274
miR-18a	up	CSRNP3	down	-0.288952	0.00293119	-0.147877	3.11629e-05	-0.188039	0.00177019	-0.288952	0.00293119	-0.31037	0.00141954
miR-4728	up	MTMR10	down	-0.288844	0.00294238	-0.00247793	0.944668	0.0256033	0.673067	-0.288844	0.00294238	-0.0205954	0.836407
miR-615	up	DST	down	-0.288737	0.00295345	-0.155137	1.23283e-05	-0.218354	0.000270605	-0.288737	0.00295345	-0.0342597	0.731181
miR-215	down	MKI67	up	-0.287883	0.00304301	0.0619642	0.0823484	0.0710529	0.241101	-0.287883	0.00304301	0.178323	0.0715194
miR-33a	up	ANKRD29	down	-0.287756	0.00305655	-0.201777	1.12718e-08	-0.409742	1.61762e-12	-0.287756	0.00305655	-0.246191	0.0121835
miR-940	up	FZD7	down	-0.287724	0.00305994	-0.134884	0.000147453	-0.214016	0.000359965	-0.287724	0.00305994	-0.0318589	0.749372
miR-141	up	SIRPA	down	-0.287179	0.00311863	-0.27078	1.08309e-14	-0.404741	3.18007e-12	-0.287179	0.00311863	-0.194507	0.0489779
miR-365a	down	DENND1B	up	-0.286926	0.00314629	0.0963503	0.00683116	0.046853	0.439857	-0.286926	0.00314629	0.134979	0.174021
miR-365b	down	DENND1B	up	-0.286722	0.00316869	0.0937638	0.00848775	0.0476096	0.4325	-0.286722	0.00316869	0.136693	0.168567
miR-451a	down	MIF	up	-0.286617	0.00318026	0.0411412	0.248988	0.0524291	0.387323	-0.286617	0.00318026	-0.239236	0.0149411
miR-4728	up	HHIP	down	-0.286597	0.00318253	-0.0869432	0.0146951	-0.0533418	0.379101	-0.286597	0.00318253	-0.240242	0.0145113
miR-4732	down	PPP1R37	up	-0.286483	0.00319514	-0.00621532	0.861798	0.0824418	0.173598	-0.286483	0.00319514	-0.0347575	0.727427
miR-204	down	SAMD1	up	-0.28588	0.00326271	-0.165618	2.99611e-06	-0.07734	0.201862	-0.28588	0.00326271	-0.16356	0.0987732
miR-100	down	LIN28B	up	-0.285008	0.00336281	-0.0460981	0.196411	-0.0833571	0.168855	-0.285008	0.00336281	0.0762046	0.444231
miR-155	up	AKR1C3	down	-0.284783	0.00338905	0.0137175	0.700808	0.0284226	0.639483	-0.284783	0.00338905	-0.0715445	0.47266
miR-140	down	MMP13	up	-0.284564	0.00341479	-0.0283883	0.426447	-0.197567	0.00100963	-0.284564	0.00341479	-0.167395	0.0910113
miR-203a	up	LIFR	down	-0.284564	0.00341479	-0.145054	4.41838e-05	-0.113729	0.0601008	-0.284564	0.00341479	-0.330333	0.000654925
miR-21	up	APOLD1	down	-0.284228	0.00345463	-0.0608189	0.0881851	0.00442109	0.941927	-0.284228	0.00345463	-0.116954	0.239391
miR-584	down	SHISA9	up	-0.283341	0.00356169	-0.165843	2.90395e-06	-0.13711	0.0232121	-0.283341	0.00356169	-0.269736	0.00586235
miR-139	down	LRRC45	up	-0.28321	0.00357782	-0.073225	0.0400037	0.00375931	0.950608	-0.28321	0.00357782	-0.0396892	0.690599
miR-335	down	RP1	up	-0.282948	0.0036101	0.0801232	0.0245902	0.0523076	0.388425	-0.282948	0.0036101	0.067619	0.497353
miR-21	up	SOD3	down	-0.282892	0.00361704	0.0344704	0.334162	0.0262258	0.665593	-0.282892	0.00361704	-0.0815553	0.412809
miR-195	down	TPM3	up	-0.282743	0.00363558	-0.263792	5.38824e-14	-0.365231	4.52581e-10	-0.282743	0.00363558	-0.0866112	0.384346
miR-365a	down	BAX	up	-0.28237	0.00368242	-0.109666	0.00206356	0.0211536	0.727395	-0.28237	0.00368242	-0.170316	0.0854305
miR-215	down	E2F8	up	-0.281778	0.00375773	0.112267	0.00160791	0.0649945	0.283691	-0.281778	0.00375773	0.155524	0.116718
miR-4728	up	TMEM133	down	-0.281358	0.00381206	-0.0730365	0.0405199	-0.0923788	0.127156	-0.281358	0.00381206	-0.1607	0.104893
miR-503	up	TEAD1	down	-0.280732	0.00389434	0.0699963	0.0496542	0.0339061	0.576271	-0.280732	0.00389434	0.0561149	0.573436
miR-192	up	PDE2A	down	-0.280291	0.00395322	-0.230713	5.73053e-11	-0.213517	0.00037184	-0.280291	0.00395322	-0.0343554	0.730459
miR-125b-2	down	CSMD2	up	-0.280218	0.00396297	0.194442	3.82659e-08	0.156832	0.00931477	-0.280218	0.00396297	0.283741	0.00367886
miR-145	down	TPM3	up	-0.280206	0.00396462	-0.12657	0.000371703	-0.0663386	0.27383	-0.280206	0.00396462	-0.0409917	0.680987
miR-215	down	REEP1	up	-0.279772	0.00402345	0.00751238	0.833342	-0.0120435	0.842692	-0.279772	0.00402345	-0.0746015	0.453901
miR-21	up	RPS6KA3	down	-0.279516	0.00405854	-0.0867827	0.01488	-0.0198917	0.743068	-0.279516	0.00405854	0.0554395	0.578067
miR-675	down	CDC6	up	-0.279311	0.00408684	-0.114094	0.00134542	0.0727185	0.23022	-0.279311	0.00408684	-0.195751	0.047521
miR-4728	up	RNF157	down	-0.278662	0.00417766	-0.152813	1.66643e-05	0.0121692	0.841071	-0.278662	0.00417766	-0.107279	0.280768
miR-335	down	QPRT	up	-0.277192	0.00438984	0.0119267	0.738329	-0.0081501	0.89317	-0.277192	0.00438984	-0.0598188	0.548358
miR-4728	up	DNAH9	down	-0.277155	0.00439543	-0.107064	0.00263504	-0.173718	0.00392212	-0.277155	0.00439543	-0.153809	0.120858
miR-206	down	TSPAN1	up	-0.277088	0.00440529	-0.16644	2.67151e-06	-0.130198	0.031202	-0.277088	0.00440529	0.0419772	0.673749
miR-192	up	PXDC1	down	-0.275714	0.00461307	-0.258484	1.76628e-13	-0.213887	0.000362982	-0.275714	0.00461307	-0.0209516	0.833618
miR-215	down	LRP8	up	-0.2752	0.00469289	0.0908759	0.0107533	0.0244168	0.687403	-0.2752	0.00469289	0.245725	0.0123534
miR-96	up	CLIP4	down	-0.274925	0.00473616	-0.295094	2.80907e-17	-0.202597	0.000742725	-0.274925	0.00473616	-0.146093	0.140887
miR-3127	up	LONRF3	down	-0.274541	0.00479714	-0.145114	4.38632e-05	-0.21192	0.000412337	-0.274541	0.00479714	-0.114603	0.249032
miR-215	down	PLEKHF2	up	-0.273778	0.00492053	0.0903518	0.0112176	-0.0358419	0.554677	-0.273778	0.00492053	-0.0898439	0.366783
miR-342	up	KCTD16	down	-0.273765	0.00492265	-0.0546119	0.125828	-0.0400744	0.508881	-0.273765	0.00492265	0.0131013	0.895501
miR-192	up	THBD	down	-0.273623	0.00494584	-0.207583	4.14431e-09	-0.124798	0.0389798	-0.273623	0.00494584	0.144451	0.145455
miR-215	down	MANF	up	-0.273435	0.00497672	-0.0454162	0.203119	0.0160002	0.792045	-0.273435	0.00497672	0.18633	0.0594969
miR-140	down	FANCA	up	-0.273332	0.00499392	-0.0492094	0.167852	-0.171448	0.0044259	-0.273332	0.00499392	-0.15293	0.12302
miR-215	down	PLK4	up	-0.273203	0.00501521	0.0651224	0.0678582	0.0332682	0.583471	-0.273203	0.00501521	0.0879025	0.377271
miR-192	up	KCTD12	down	-0.272718	0.00509644	-0.226133	1.38949e-10	-0.106807	0.0775735	-0.272718	0.00509644	0.032734	0.742725
miR-335	down	CST1	up	-0.272636	0.00511031	0.00759785	0.831475	0.00053237	0.993001	-0.272636	0.00511031	-0.0504537	0.612771
miR-192	up	PCOLCE2	down	-0.272392	0.00515176	-0.159616	6.81004e-06	-0.112172	0.0637179	-0.272392	0.00515176	-0.0270427	0.786273
miR-215	down	KIF20A	up	-0.272264	0.00517348	0.0549053	0.123805	0.0674554	0.265817	-0.272264	0.00517348	0.145527	0.142449
miR-215	down	HOPX	up	-0.27173	0.00526551	0.00900787	0.800805	-0.0408171	0.501052	-0.27173	0.00526551	0.143368	0.148529
miR-335	down	CNFN	up	-0.27135	0.00533174	-0.0893124	0.0121914	-0.11187	0.0644399	-0.27135	0.00533174	-0.210048	0.0332081
miR-877	up	PIGR	down	-0.271185	0.00536083	-0.204004	7.70542e-09	-0.20438	0.00066499	-0.271185	0.00536083	-0.193505	0.0501771
miR-155	up	PYGL	down	-0.271182	0.00536136	-0.0148741	0.676949	-0.0504859	0.405182	-0.271182	0.00536136	0.154018	0.120347
miR-335	down	SEC14L4	up	-0.271169	0.00536364	-0.101265	0.00446012	0.0160423	0.791511	-0.271169	0.00536364	-0.121815	0.220285
miR-335	down	SLC6A9	up	-0.271123	0.00537176	-0.1096	0.00207655	-0.0446755	0.461428	-0.271123	0.00537176	-0.158315	0.110221
miR-215	down	CKAP2L	up	-0.269925	0.00558726	0.0670987	0.059906	0.0660149	0.276183	-0.269925	0.00558726	0.18703	0.0585288
miR-4728	up	TMTC1	down	-0.269445	0.00567574	-0.0440665	0.216885	0.0527448	0.384466	-0.269445	0.00567574	-0.00684546	0.945287
miR-877	up	ARRDC3	down	-0.269354	0.00569264	-0.120182	0.000728992	-0.175629	0.00353875	-0.269354	0.00569264	0.0369914	0.710662
miR-335	down	MMEL1	up	-0.269323	0.00569839	0.0767174	0.0314017	-0.0680177	0.261843	-0.269323	0.00569839	0.136253	0.169956
miR-4728	up	CRTAP	down	-0.269093	0.00574142	-0.0935435	0.00864422	0.0100736	0.868166	-0.269093	0.00574142	0.00752931	0.939831
miR-375	up	F3	down	-0.268339	0.00588429	-0.0744458	0.0367938	-0.140837	0.0196879	-0.268339	0.00588429	-0.168632	0.0886137
miR-584	down	TSPAN1	up	-0.268212	0.00590859	-0.396838	4.39459e-31	-0.145261	0.0161158	-0.268212	0.00590859	-0.397642	3.19321e-05
miR-215	down	ASPM	up	-0.268208	0.0059094	0.0725082	0.0419966	0.0719018	0.235511	-0.268208	0.0059094	0.135464	0.172465
miR-335	down	SNCB	up	-0.268179	0.00591493	-0.0714477	0.0450986	-0.0212616	0.726059	-0.268179	0.00591493	-0.102662	0.30211
miR-4728	up	NPR1	down	-0.268078	0.00593441	-0.132656	0.000189915	-0.0931621	0.12395	-0.268078	0.00593441	-0.103371	0.298768
miR-10b	down	FZD2	up	-0.268048	0.00594035	0.0923641	0.00952634	0.104107	0.0854201	-0.268048	0.00594035	0.23969	0.0147459
miR-493	up	AADACL3	down	-0.267744	0.00599936	0.0177654	0.618746	-0.00627155	0.917694	-0.267744	0.00599936	0.0260401	0.794018
miR-592	up	AKAP12	down	-0.267288	0.00608882	-0.232628	3.93504e-11	-0.162495	0.00703006	-0.267288	0.00608882	-0.200248	0.0425516
miR-5683	down	POLQ	up	-0.266146	0.00631805	-0.195998	2.96414e-08	-0.251195	2.59184e-05	-0.266146	0.00631805	-0.183116	0.0641071
miR-144	down	SLC7A2	up	-0.265684	0.00641294	0.117165	0.000991162	0.0411798	0.497253	-0.265684	0.00641294	0.273859	0.00512334
miR-335	down	DCAF4L2	up	-0.265192	0.00651551	0.00399217	0.910969	0.0290304	0.632335	-0.265192	0.00651551	-0.0168652	0.865729
miR-33a	up	ARHGAP31	down	-0.264815	0.006595	-0.0740908	0.0377037	-0.114975	0.0573293	-0.264815	0.006595	-0.113298	0.254498
miR-511	down	WDR72	up	-0.264794	0.00659951	-0.000967592	0.978379	-0.0337461	0.578072	-0.264794	0.00659951	0.0938869	0.345525
miR-3127	up	FADS3	down	-0.263842	0.00680408	-0.116914	0.00101656	-0.224346	0.000180789	-0.263842	0.00680408	-0.188874	0.0560433
miR-192	up	CAV1	down	-0.263724	0.00682992	-0.311824	3.30148e-19	-0.256472	1.72292e-05	-0.263724	0.00682992	-0.170506	0.0850773
miR-155	up	FGF2	down	-0.263237	0.00693705	0.121282	0.000650618	-0.0260611	0.667568	-0.263237	0.00693705	0.0708824	0.476778
miR-940	up	EGF	down	-0.262543	0.00709253	-0.0668179	0.0609867	-0.0281482	0.642721	-0.262543	0.00709253	-0.0442681	0.657038
miR-4728	up	SLC10A6	down	-0.262345	0.00713734	-0.00788741	0.825154	-0.0663963	0.273412	-0.262345	0.00713734	-0.125706	0.205788
miR-106a	up	KLF10	down	-0.262277	0.00715294	-0.113065	0.00148802	-0.138235	0.0220947	-0.262277	0.00715294	-0.136254	0.169951
miR-335	down	SDF2L1	up	-0.260727	0.00751384	-0.0471082	0.186774	0.00751379	0.901467	-0.260727	0.00751384	-0.202912	0.0398173
miR-4728	up	RBMS2	down	-0.2607	0.0075202	-0.0339955	0.340867	-0.0418799	0.489962	-0.2607	0.0075202	-0.0291856	0.769791
miR-143	down	SYT7	up	-0.260535	0.00755957	-0.0623211	0.0805946	-0.121531	0.0444364	-0.260535	0.00755957	0.0475509	0.633384
miR-335	down	ARSI	up	-0.260276	0.00762185	-0.0931132	0.00895728	-0.112201	0.0636486	-0.260276	0.00762185	-0.162994	0.0999609
miR-4668	up	KLF2	down	-0.259889	0.00771564	-0.0835824	0.0190191	-0.225584	0.000166104	-0.259889	0.00771564	0.076727	0.441106
miR-215	down	SIX4	up	-0.25974	0.00775205	0.016441	0.645138	-0.0496416	0.413093	-0.25974	0.00775205	-0.15463	0.118862
miR-335	down	TACR3	up	-0.259474	0.00781727	0.0409919	0.250712	0.038284	0.52801	-0.259474	0.00781727	0.137615	0.165686
miR-192	up	PPARG	down	-0.259176	0.00789085	-0.188259	1.03435e-07	-0.108346	0.0733705	-0.259176	0.00789085	0.181989	0.0657916
miR-155	up	ADAMTS5	down	-0.257852	0.00822593	0.0275121	0.440867	-0.031407	0.604717	-0.257852	0.00822593	-0.0420512	0.673207
miR-335	down	APLP1	up	-0.257392	0.00834545	-0.0554342	0.120221	-0.0403328	0.50615	-0.257392	0.00834545	-0.0990364	0.319594
miR-335	down	CLDN14	up	-0.256292	0.00863686	-0.145402	4.2337e-05	-0.038248	0.528398	-0.256292	0.00863686	-0.164531	0.096761
miR-106a	up	LUZP2	down	-0.256236	0.00865182	-0.179483	4.01285e-07	-0.0979691	0.105629	-0.256236	0.00865182	-0.174862	0.0772892
miR-215	down	NCAPH	up	-0.2561	0.00868857	0.0416917	0.242707	0.071866	0.235745	-0.2561	0.00868857	0.162716	0.100549
miR-4668	up	XKR4	down	-0.255907	0.00874112	-0.097858	0.00600524	-0.154572	0.010397	-0.255907	0.00874112	0.0431197	0.665394
miR-192	up	FZD4	down	-0.255552	0.00883798	-0.0879691	0.0135602	-0.157174	0.0091602	-0.255552	0.00883798	-0.0125019	0.900257
miR-155	up	CHRDL1	down	-0.254602	0.00910231	0.201476	1.18615e-08	0.154177	0.0105971	-0.254602	0.00910231	0.16632	0.0931363
miR-215	down	ANLN	up	-0.254589	0.00910595	0.0420847	0.238291	0.0984072	0.104071	-0.254589	0.00910595	0.108862	0.27369
miR-10b	down	UHRF1	up	-0.254576	0.00910954	-0.319729	3.65436e-20	-0.333018	1.61099e-08	-0.254576	0.00910954	-0.315392	0.00117429
miR-383	down	GPSM2	up	-0.254523	0.00912463	-0.0637727	0.0737717	-0.303879	2.91448e-07	-0.254523	0.00912463	0.0288581	0.772303
miR-155	up	SCD	down	-0.254135	0.00923453	-0.00366445	0.918251	0.015199	0.802238	-0.254135	0.00923453	-0.0640575	0.520328
miR-181b-2	up	ABCG8	down	-0.253609	0.00938578	0.03689	0.301323	-0.018079	0.765767	-0.253609	0.00938578	-0.0177618	0.858663
miR-4728	up	DSEL	down	-0.253293	0.0094778	-0.103835	0.00354345	-0.14205	0.0186462	-0.253293	0.0094778	-0.155682	0.116344
miR-335	down	CHAC1	up	-0.253159	0.00951684	-0.115728	0.00114453	-0.111713	0.0648177	-0.253159	0.00951684	-0.191066	0.0532002
miR-215	down	FADS6	up	-0.252636	0.00967118	-0.0206771	0.56245	0.0193826	0.749422	-0.252636	0.00967118	0.0271129	0.785731
miR-335	down	PLA2G10	up	-0.252635	0.00967166	0.0198315	0.578542	0.0578198	0.340332	-0.252635	0.00967166	0.0365399	0.71404
miR-335	down	CLEC11A	up	-0.252597	0.00968298	-0.0414158	0.245842	-0.0166486	0.783822	-0.252597	0.00968298	-0.191167	0.0530715
miR-215	down	OTUB2	up	-0.252508	0.00970945	0.0514382	0.149392	-0.0381891	0.529034	-0.252508	0.00970945	-0.0613463	0.538172
miR-145	down	PADI1	up	-0.2518	0.00992252	0.0220772	0.536289	0.0564043	0.352304	-0.2518	0.00992252	0.0354801	0.72199
miR-877	up	EML5	down	-0.251337	0.010064	-0.01123	0.753103	-0.123799	0.0405843	-0.251337	0.010064	0.00451953	0.963861
miR-335	down	SYNGR3	up	-0.251225	0.0100988	0.0232413	0.515012	-0.0671141	0.268248	-0.251225	0.0100988	0.13249	0.182168
miR-940	up	PIGR	down	-0.251221	0.0101	-0.0873669	0.0142166	-0.174794	0.00370179	-0.251221	0.0101	-0.154833	0.118373
miR-378a	down	MELK	up	-0.250569	0.0103029	0.199341	1.70013e-08	0.147761	0.014359	-0.250569	0.0103029	0.0675745	0.497637
miR-335	down	FCRLA	up	-0.249987	0.010487	0.0377996	0.289552	0.0820342	0.175742	-0.249987	0.010487	0.0488375	0.624212
miR-215	down	BLM	up	-0.249429	0.0106666	0.0698631	0.050091	0.0660305	0.27607	-0.249429	0.0106666	0.150634	0.128816
miR-5683	down	CCNB1	up	-0.249254	0.0107232	-0.191651	6.01852e-08	-0.296518	5.77276e-07	-0.249254	0.0107232	-0.166141	0.0934939
miR-192	up	PARM1	down	-0.24925	0.0107247	-0.0773346	0.0300593	-0.093476	0.122683	-0.24925	0.0107247	0.118735	0.232263
miR-335	down	ZIC4	up	-0.249212	0.0107371	-0.154865	1.27722e-05	0.0656643	0.278747	-0.249212	0.0107371	-0.292662	0.00270048
miR-592	up	EMCN	down	-0.248689	0.0109087	-0.210534	2.46446e-09	-0.271779	5.00968e-06	-0.248689	0.0109087	-0.0777556	0.434988
miR-215	down	LMNB2	up	-0.247325	0.0113675	-0.0305277	0.392414	0.0135777	0.822964	-0.247325	0.0113675	0.210608	0.0327311
miR-335	down	FBN2	up	-0.247283	0.0113817	-0.0265155	0.457602	-0.0874381	0.148878	-0.247283	0.0113817	-0.0265823	0.789827
miR-4728	up	ACADL	down	-0.247008	0.0114761	-0.108949	0.00220847	-0.115032	0.0572064	-0.247008	0.0114761	-0.105554	0.288622
miR-4728	up	ANGPT4	down	-0.246831	0.0115375	-0.0918491	0.00993611	-0.124308	0.0397588	-0.246831	0.0115375	-0.14275	0.150307
miR-4728	up	SLC19A3	down	-0.2464	0.0116878	-0.212002	1.89732e-09	-0.0307168	0.612682	-0.2464	0.0116878	-0.242889	0.013432
miR-335	down	C8G	up	-0.246339	0.0117092	-0.0488546	0.170942	-0.0373928	0.537665	-0.246339	0.0117092	-0.047464	0.634006
miR-335	down	2018-03-11	up	-0.246098	0.0117941	0.0611953	0.0862311	0.0344824	0.569801	-0.246098	0.0117941	-0.0165569	0.868161
miR-155	up	KLF9	down	-0.245879	0.011872	-0.06575	0.0652441	-0.103728	0.0865705	-0.245879	0.011872	-0.103737	0.297049
miR-4728	up	ADIPOQ	down	-0.244783	0.0122674	-0.137879	0.000104293	-0.0432764	0.475591	-0.244783	0.0122674	-0.193508	0.0501744
miR-335	down	IL21R	up	-0.244481	0.0123783	-0.0981959	0.00583297	-0.0399839	0.509838	-0.244481	0.0123783	-0.130222	0.189835
miR-511	down	HDGF	up	-0.244394	0.0124106	-0.0249458	0.484669	0.0285929	0.637477	-0.244394	0.0124106	0.183968	0.0628581
miR-192	up	PLA2G5	down	-0.244051	0.0125379	-0.262167	7.77122e-14	-0.25425	2.04843e-05	-0.244051	0.0125379	-0.0997057	0.316319
miR-93	up	RND3	down	-0.24373	0.0126579	-0.0388954	0.275787	-0.0650099	0.283576	-0.24373	0.0126579	-0.161399	0.103371
miR-335	down	SYN1	up	-0.243704	0.0126678	-0.00242883	0.945763	-0.00393962	0.948242	-0.243704	0.0126678	0.0135047	0.892303
miR-335	down	ENHO	up	-0.243652	0.0126875	0.00245272	0.94523	0.0388157	0.522291	-0.243652	0.0126875	-0.0238317	0.811146
miR-335	down	SNTN	up	-0.243577	0.0127158	0.0291014	0.414917	-0.0424264	0.484311	-0.243577	0.0127158	0.0627858	0.52866
miR-3677	up	HOXA3	down	-0.24347	0.0127563	-0.184618	1.82968e-07	-0.251229	2.58513e-05	-0.24347	0.0127563	-0.195124	0.048251
miR-4728	up	GLP2R	down	-0.243119	0.0128895	-0.10539	0.00307519	0.0184167	0.761522	-0.243119	0.0128895	-0.145782	0.141743
miR-19a	up	CCDC80	down	-0.243045	0.0129181	-0.329126	2.44805e-21	-0.303983	2.88619e-07	-0.243045	0.0129181	-0.343953	0.000374659
miR-342	up	CRIM1	down	-0.242722	0.0130424	0.186681	1.32622e-07	0.103649	0.0868117	-0.242722	0.0130424	0.282692	0.00381264
miR-6892	down	DPYSL5	up	-0.24238	0.0131748	-0.0496306	0.164239	-0.0654913	0.280018	-0.24238	0.0131748	-0.0769409	0.439829
miR-1301	up	SV2C	down	-0.242345	0.0131885	-0.0473335	0.184673	-0.0458004	0.450211	-0.242345	0.0131885	0.0443865	0.656178
miR-301a	up	SH3TC2	down	-0.242313	0.0132009	-0.0347121	0.330781	-0.160979	0.00758665	-0.242313	0.0132009	-0.0550012	0.58108
miR-1301	up	MYLK	down	-0.241704	0.0134402	-0.248145	1.65302e-12	-0.308231	1.92846e-07	-0.241704	0.0134402	-0.176439	0.0746146
miR-335	down	ASCL2	up	-0.239909	0.0141684	-0.0158939	0.656177	-0.0363727	0.548826	-0.239909	0.0141684	-0.0217199	0.827609
miR-3127	up	POU6F1	down	-0.239671	0.0142676	-0.255453	3.43831e-13	-0.239876	6.0407e-05	-0.239671	0.0142676	-0.31896	0.00102418
miR-4728	up	CHRDL1	down	-0.239577	0.0143066	-0.167674	2.24624e-06	-0.0917875	0.129618	-0.239577	0.0143066	-0.215596	0.0287317
miR-335	down	PTPN7	up	-0.239477	0.0143487	-0.00200205	0.955282	0.0773188	0.201986	-0.239477	0.0143487	-0.0122239	0.902464
miR-33a	up	TGFBR2	down	-0.23876	0.014652	-0.254119	4.59603e-13	-0.334561	1.37004e-08	-0.23876	0.014652	-0.246709	0.0119973
miR-192	up	RNASE4	down	-0.238749	0.0146569	-0.0929138	0.00910571	-0.0422254	0.486386	-0.238749	0.0146569	0.122367	0.218187
miR-10b	down	POC1A	up	-0.238677	0.0146877	-0.299567	8.80549e-18	-0.261313	1.17542e-05	-0.238677	0.0146877	-0.211981	0.0315861
miR-93	up	KCNMB1	down	-0.238599	0.0147211	-0.0211363	0.553804	-0.114141	0.0591732	-0.238599	0.0147211	-0.141108	0.155103
miR-4668	up	LDHD	down	-0.23851	0.014759	0.0422925	0.235978	-0.0473205	0.435302	-0.23851	0.014759	0.192536	0.0513611
miR-592	up	NMNAT2	down	-0.238375	0.0148173	0.0268111	0.452601	-0.0157491	0.795236	-0.238375	0.0148173	0.0429742	0.666456
miR-7-1	up	TWIST1	down	-0.237998	0.0149805	-0.219424	4.91443e-10	-0.213437	0.000373773	-0.237998	0.0149805	-0.126121	0.204284
miR-130b	up	NAV2	down	-0.23753	0.0151856	0.0261183	0.464369	-0.0352776	0.56093	-0.23753	0.0151856	0.116653	0.240611
miR-215	down	KIF14	up	-0.237281	0.0152957	0.0691817	0.0523759	0.0825916	0.172815	-0.237281	0.0152957	0.142444	0.151193
miR-584	down	CDC25A	up	-0.236535	0.0156296	0.251101	8.81224e-13	0.00460589	0.939504	-0.236535	0.0156296	0.129392	0.192697
miR-3170	up	CXorf36	down	-0.23611	0.0158226	-0.166504	2.64743e-06	-0.2761	3.48605e-06	-0.23611	0.0158226	-0.0494447	0.619903
miR-590	up	ID4	down	-0.236046	0.0158518	0.00128622	0.971262	-0.0376863	0.534475	-0.236046	0.0158518	-0.124804	0.209086
miR-215	down	FAM83D	up	-0.235486	0.0161101	0.0558728	0.117311	0.0534895	0.377781	-0.235486	0.0161101	0.183228	0.0639425
miR-155	up	FMNL2	down	-0.235126	0.0162776	0.367339	1.5029e-26	0.364623	4.8597e-10	-0.235126	0.0162776	0.307424	0.00158423
miR-96	up	SLC25A25	down	-0.234937	0.0163662	-0.0740014	0.037936	-0.173497	0.00396873	-0.234937	0.0163662	-0.139507	0.159889
miR-429	up	TCF7L2	down	-0.234482	0.0165815	-0.131112	0.000225819	-0.0748677	0.2167	-0.234482	0.0165815	-0.0283946	0.775863
miR-125b-2	down	MRPL12	up	-0.234195	0.0167185	-0.194876	3.56426e-08	-0.239661	6.13586e-05	-0.234195	0.0167185	-0.245886	0.0122944
miR-335	down	NDP	up	-0.233813	0.0169023	0.0156631	0.660854	0.0171813	0.777083	-0.233813	0.0169023	0.0341065	0.732337
miR-675	down	AKAP5	up	-0.233665	0.0169737	0.0781349	0.0283921	-0.0289273	0.633546	-0.233665	0.0169737	0.066122	0.506945
miR-1247	down	NME1-NME2	up	-0.233112	0.0172443	-0.0926483	0.00930677	-0.0364497	0.547979	-0.233112	0.0172443	-0.00929025	0.925795
miR-378c	down	KCNJ6	up	-0.232904	0.017347	-0.035067	0.325858	-0.0412652	0.496361	-0.232904	0.017347	-0.10267	0.30207
miR-32	up	CIDEC	down	-0.232828	0.0173844	-0.128236	0.000310171	-0.119751	0.0476699	-0.232828	0.0173844	-0.130444	0.189073
miR-148b	up	DNAJB4	down	-0.232738	0.017429	-0.120551	0.000701838	-0.199929	0.000874869	-0.232738	0.017429	-0.255724	0.00913002
miR-33a	up	HCAR2	down	-0.232709	0.0174432	-0.112499	0.00157226	-0.189302	0.00164563	-0.232709	0.0174432	-0.000402102	0.996784
miR-192	up	PPP1R3G	down	-0.232665	0.0174654	-0.29003	1.01906e-16	-0.265587	8.3334e-06	-0.232665	0.0174654	-0.176337	0.0747862
miR-483	down	IL21R	up	-0.232524	0.0175356	-0.0939598	0.00835069	-0.105074	0.0825384	-0.232524	0.0175356	0.0542615	0.586184
miR-140	down	DRAXIN	up	-0.232205	0.0176952	0.000668296	0.985066	0.00127301	0.983265	-0.232205	0.0176952	0.0257124	0.796553
miR-335	down	TEKT1	up	-0.231872	0.0178637	-0.00662566	0.852774	-0.0257735	0.671021	-0.231872	0.0178637	0.0964654	0.33238
miR-4746	up	SCN2B	down	-0.231856	0.0178714	-0.281214	9.03525e-16	-0.141234	0.0193411	-0.231856	0.0178714	-0.293552	0.00261707
miR-365a	down	PADI3	up	-0.231501	0.0180527	0.118702	0.000848317	0.0431718	0.476659	-0.231501	0.0180527	0.0408042	0.682368
miR-365b	down	PADI3	up	-0.231321	0.0181448	0.120414	0.000711771	0.0416735	0.492105	-0.231321	0.0181448	0.0384246	0.699978
miR-335	down	DIO1	up	-0.231042	0.0182887	0.0212933	0.550861	-0.144359	0.016794	-0.231042	0.0182887	0.0755507	0.448162
miR-4668	up	SCD	down	-0.230858	0.0183841	0.144704	4.61182e-05	0.220647	0.000232204	-0.230858	0.0183841	0.263439	0.00717421
miR-5683	down	KCNK6	up	-0.230816	0.0184063	0.0101444	0.776301	0.0518358	0.392724	-0.230816	0.0184063	0.144315	0.145839
miR-10b	down	TCF19	up	-0.23077	0.01843	-0.391231	3.47365e-30	-0.361071	7.34514e-10	-0.23077	0.01843	-0.300254	0.00205972
miR-99a	down	CENPN	up	-0.230436	0.0186045	-0.296718	1.84818e-17	-0.295194	6.51465e-07	-0.230436	0.0186045	-0.312856	0.00129286
miR-10b	down	MELK	up	-0.230259	0.0186981	-0.436837	5.22453e-38	-0.419596	4.13091e-13	-0.230259	0.0186981	-0.387799	5.18188e-05
miR-92b	up	KAT2B	down	-0.230052	0.0188072	-0.11219	0.00162006	-0.0274916	0.650496	-0.230052	0.0188072	-0.0899012	0.366476
miR-378a	down	HIST1H3H	up	-0.230026	0.0188209	-0.131136	0.000225198	-0.167748	0.00537291	-0.230026	0.0188209	-0.2156	0.0287288
miR-143	down	STXBP2	up	-0.230015	0.0188271	0.00222592	0.950287	-0.0620488	0.306128	-0.230015	0.0188271	0.06695	0.501628
miR-585	down	DEPDC1	up	-0.229999	0.0188354	-0.0983362	0.00576273	-0.117692	0.0516528	-0.229999	0.0188354	-0.0898188	0.366918
miR-19a	up	DCUN1D3	down	-0.229757	0.0189643	-0.278412	1.77922e-15	-0.274589	3.96e-06	-0.229757	0.0189643	-0.187101	0.0584323
miR-4728	up	TLCD2	down	-0.229135	0.0192992	0.0364804	0.306725	0.146199	0.0154361	-0.229135	0.0192992	0.146363	0.140146
miR-215	down	ATAD2	up	-0.22853	0.0196295	0.0700239	0.0495643	-0.0122649	0.839839	-0.22853	0.0196295	0.0109206	0.91282
miR-195	down	OSCAR	up	-0.228432	0.0196831	-0.131965	0.000205258	-0.0746141	0.218266	-0.228432	0.0196831	-0.195793	0.0474732
miR-192	up	KLF10	down	-0.22819	0.0198169	-0.111353	0.00175627	-0.0637088	0.293343	-0.22819	0.0198169	-0.165039	0.0957203
miR-192	up	TMEM246	down	-0.22791	0.0199728	-0.215092	1.08759e-09	-0.177817	0.00314182	-0.22791	0.0199728	-0.0994871	0.317386
miR-4728	up	ZCCHC24	down	-0.227553	0.0201731	-0.0416866	0.242764	-0.0692099	0.253554	-0.227553	0.0201731	-0.039787	0.689876
miR-215	down	CCDC150	up	-0.227129	0.0204129	-0.0173357	0.627257	0.0402716	0.506795	-0.227129	0.0204129	-0.0293328	0.768662
miR-551b	down	BRI3BP	up	-0.226252	0.0209171	0.0182083	0.610025	0.0411999	0.497043	-0.226252	0.0209171	-0.0787005	0.42941
miR-148b	up	PROX1	down	-0.226218	0.0209373	-0.238925	1.11665e-11	-0.32035	5.89155e-08	-0.226218	0.0209373	-0.15448	0.119225
let-7c	down	ACTA1	up	-0.22602	0.0210525	0.104898	0.00321679	0.0379342	0.53179	-0.22602	0.0210525	-0.0186242	0.851877
miR-3127	up	GALNT8	down	-0.225857	0.0211476	-0.103478	0.00365946	-0.281253	2.244e-06	-0.225857	0.0211476	-0.136064	0.170554
miR-92b	up	EIF4EBP2	down	-0.225759	0.0212057	-0.0182222	0.609752	-0.0148439	0.806766	-0.225759	0.0212057	0.0936799	0.346594
miR-4728	up	PKNOX2	down	-0.225523	0.0213446	0.0147668	0.679149	0.0040184	0.947209	-0.225523	0.0213446	0.0579708	0.560804
miR-551b	down	AMER2	up	-0.225341	0.0214522	0.0633574	0.0756741	0.0631581	0.297545	-0.225341	0.0214522	0.236252	0.0162812
miR-204	down	PLAUR	up	-0.224865	0.0217364	-0.132963	0.000183449	-0.0728018	0.229685	-0.224865	0.0217364	-0.228526	0.020244
miR-6892	down	SIX3	up	-0.224145	0.0221728	0.0319142	0.371263	-0.104339	0.084722	-0.224145	0.0221728	0.0384492	0.699795
miR-335	down	RIMS2	up	-0.22347	0.0225883	-0.036326	0.308778	-0.0469241	0.439163	-0.22347	0.0225883	-0.202271	0.040462
miR-877	up	DKK3	down	-0.223338	0.02267	-0.323962	1.09433e-20	-0.256181	1.76253e-05	-0.223338	0.02267	-0.256317	0.00896456
miR-182	up	DUSP1	down	-0.222984	0.0228917	-0.0577827	0.105278	0.0176576	0.771073	-0.222984	0.0228917	0.0807923	0.417209
miR-301a	up	PRNP	down	-0.222837	0.0229841	-0.0576	0.106386	-0.0658309	0.277527	-0.222837	0.0229841	0.00909835	0.927323
miR-187	up	RASSF9	down	-0.222525	0.0231813	-0.0626979	0.0787765	-0.0210865	0.728225	-0.222525	0.0231813	-0.148881	0.133377
miR-335	down	SYT14	up	-0.22093	0.0242119	-0.0700298	0.0495452	-0.000598497	0.992132	-0.22093	0.0242119	-0.115392	0.245766
miR-7-1	up	DGKI	down	-0.220843	0.0242692	-0.25373	5.00157e-13	-0.171784	0.00434776	-0.220843	0.0242692	-0.0404649	0.684869
miR-145	down	HDAC11	up	-0.220563	0.0244546	-0.0623293	0.0805548	-0.109886	0.0693515	-0.220563	0.0244546	0.016204	0.870946
miR-155	up	TXNIP	down	-0.220351	0.0245956	0.00336493	0.924912	0.0390985	0.519263	-0.220351	0.0245956	-0.0555332	0.577423
miR-19a	up	RRAS2	down	-0.220312	0.0246216	0.181496	2.9576e-07	0.0574269	0.343629	-0.220312	0.0246216	0.115144	0.246792
miR-891a	down	VSIG1	up	-0.220166	0.0247197	0.00397264	0.911402	0.00853143	0.888204	-0.220166	0.0247197	-0.0633957	0.524656
miR-93	up	STAC2	down	-0.220151	0.0247299	0.0904016	0.0111727	0.0177507	0.769899	-0.220151	0.0247299	0.037345	0.708021
miR-511	down	NCAM2	up	-0.219733	0.0250114	-0.0767807	0.0312618	-0.109732	0.0697451	-0.219733	0.0250114	-0.0564849	0.570907
miR-3614	up	NPY4R	down	-0.218857	0.0256104	-0.0142274	0.69025	-0.0668209	0.270349	-0.218857	0.0256104	0.00513511	0.958943
miR-326	down	USH1G	up	-0.217891	0.0262852	-0.0515345	0.148631	0.0142348	0.814548	-0.217891	0.0262852	-0.0156189	0.875568
miR-192	up	MCAM	down	-0.217227	0.0267579	-0.21392	1.3445e-09	-0.179959	0.00279264	-0.217227	0.0267579	-0.192295	0.0516589
miR-215	down	CEP55	up	-0.217131	0.0268268	0.0460577	0.196804	0.0802318	0.185458	-0.217131	0.0268268	0.148789	0.133621
miR-148b	up	CCL28	down	-0.216658	0.0271682	-0.0911011	0.0105591	-0.204318	0.000667582	-0.216658	0.0271682	-0.0193831	0.845914
miR-342	up	AK4	down	-0.216286	0.0274393	-0.196129	2.90083e-08	-0.152009	0.0117574	-0.216286	0.0274393	-0.0815108	0.413065
miR-1301	up	DST	down	-0.216076	0.0275939	-0.224789	1.79526e-10	-0.330053	2.19403e-08	-0.216076	0.0275939	-0.161736	0.102643
miR-378a	down	FEN1	up	-0.215472	0.0280416	0.195491	3.22193e-08	0.0654429	0.280374	-0.215472	0.0280416	-0.0860873	0.387239
miR-21	up	GAS1	down	-0.215442	0.0280637	0.265807	3.40859e-14	0.24013	5.92956e-05	-0.215442	0.0280637	0.297416	0.00228109
miR-6716	down	E2F8	up	-0.214834	0.0285206	-0.123541	0.000513573	-0.0923162	0.127415	-0.214834	0.0285206	-0.158216	0.110446
miR-335	down	LINGO3	up	-0.214833	0.0285219	0.107678	0.00248842	0.117827	0.0513851	-0.214833	0.0285219	-0.0344105	0.730043
miR-192	up	FGF7	down	-0.214751	0.0285841	-0.270421	1.17758e-14	-0.195834	0.00112032	-0.214751	0.0285841	-0.0276886	0.781295
miR-326	down	PLA2G4F	up	-0.214672	0.0286437	0.148437	2.90567e-05	0.0459725	0.448509	-0.214672	0.0286437	0.196314	0.0468744
miR-335	down	MS4A8	up	-0.214581	0.0287131	0.0832971	0.0194327	0.0521957	0.389442	-0.214581	0.0287131	0.123326	0.214573
miR-379	down	LIN28B	up	-0.214083	0.0290945	-0.160598	5.96575e-06	-0.134103	0.0264399	-0.214083	0.0290945	-0.262638	0.0073583
miR-503	up	USP53	down	-0.21372	0.0293747	-0.0598976	0.0931181	0.00316502	0.958408	-0.21372	0.0293747	0.0789098	0.42818
miR-4728	up	PDE7B	down	-0.213716	0.0293783	-0.103227	0.00374319	-0.120321	0.0466135	-0.213716	0.0293783	-0.169203	0.087524
miR-19a	up	PTPRB	down	-0.213533	0.0295201	-0.420467	4.62877e-35	-0.24133	5.43059e-05	-0.213533	0.0295201	-0.313551	0.00125932
miR-4728	up	BMP3	down	-0.213362	0.0296542	0.0439627	0.21797	-0.0583908	0.335576	-0.213362	0.0296542	0.0106879	0.91467
miR-4728	up	RASD1	down	-0.213213	0.0297704	-0.0235743	0.509008	-0.0121704	0.841056	-0.213213	0.0297704	0.105514	0.288805
miR-206	down	SMKR1	up	-0.21295	0.0299778	-0.0940031	0.00832074	-0.0221635	0.714933	-0.21295	0.0299778	-0.120413	0.225681
miR-4728	up	SLC29A4	down	-0.211988	0.0307451	0.0395209	0.268134	0.0144541	0.811744	-0.211988	0.0307451	0.0213719	0.83033
miR-375	up	ZFP36L2	down	-0.211947	0.0307785	-0.299596	8.73893e-18	-0.254738	1.9722e-05	-0.211947	0.0307785	-0.253307	0.00983262
miR-19a	up	TCN2	down	-0.211642	0.0310258	0.0871206	0.014493	0.00188236	0.975257	-0.211642	0.0310258	0.208022	0.0349832
miR-106a	up	SLC7A14	down	-0.211532	0.0311153	-0.0568867	0.110796	0.0736384	0.224363	-0.211532	0.0311153	-0.0989856	0.319844
miR-195	down	CBX2	up	-0.211433	0.0311961	-0.359718	1.88022e-25	-0.300621	3.95313e-07	-0.211433	0.0311961	-0.323371	0.000862884
miR-1269b	up	SCD	down	-0.211372	0.0312458	0.116614	0.00104758	0.149203	0.0134242	-0.211372	0.0312458	0.00955519	0.923685
miR-193a	down	PMAIP1	up	-0.211347	0.031266	0.00963077	0.78735	-0.0911035	0.132513	-0.211347	0.031266	0.0181395	0.855689
miR-195	down	EN2	up	-0.21117	0.0314116	-0.0895815	0.0119324	-0.00684154	0.910244	-0.21117	0.0314116	-0.0836701	0.400757
miR-155	up	BCL6	down	-0.21098	0.0315678	0.0247956	0.487302	-0.0257246	0.671609	-0.21098	0.0315678	0.072183	0.468708
miR-7-1	up	FFAR4	down	-0.210945	0.0315968	-0.10257	0.00397077	-0.0808087	0.182306	-0.210945	0.0315968	0.0358469	0.719235
miR-19a	up	GPAM	down	-0.210909	0.0316262	-0.200375	1.429e-08	-0.092566	0.126384	-0.210909	0.0316262	-0.0707428	0.477649
miR-335	down	KIFC2	up	-0.210251	0.0321744	0.156414	1.04257e-05	0.0606667	0.317048	-0.210251	0.0321744	0.10229	0.303874
miR-215	down	RACGAP1	up	-0.209959	0.0324195	0.05572	0.118318	0.00708048	0.907123	-0.209959	0.0324195	0.136762	0.16835
miR-3065	up	FOS	down	-0.209659	0.0326737	-0.0085127	0.811543	-0.103036	0.0887007	-0.209659	0.0326737	-0.0949296	0.340171
miR-192	up	VGLL3	down	-0.209571	0.0327487	-0.170222	1.5644e-06	-0.0593141	0.327977	-0.209571	0.0327487	-0.028247	0.776998
miR-92b	up	FOXN3	down	-0.209497	0.0328115	-0.17998	3.72313e-07	-0.103498	0.0872731	-0.209497	0.0328115	-0.176369	0.0747329
miR-192	up	DNAJB4	down	-0.20949	0.0328178	-0.150123	2.34974e-05	-0.0777297	0.199592	-0.20949	0.0328178	-0.12136	0.222027
miR-155	up	FSTL1	down	-0.209051	0.0331938	0.0811516	0.0228027	0.130394	0.0309463	-0.209051	0.0331938	-0.0937377	0.346295
miR-10b	down	TTYH3	up	-0.208997	0.0332401	-0.209049	3.20422e-09	-0.209532	0.000480594	-0.208997	0.0332401	-0.103861	0.296469
miR-192	up	AFAP1L1	down	-0.207961	0.0341432	-0.175767	6.98701e-07	-0.10085	0.0957153	-0.207961	0.0341432	-0.144225	0.146092
miR-200b	up	TCF7L2	down	-0.207707	0.0343671	-0.167192	2.40413e-06	-0.0762707	0.208187	-0.207707	0.0343671	-0.091723	0.356805
miR-511	down	SYT9	up	-0.207054	0.0349504	-0.168716	1.93866e-06	-0.109053	0.0715016	-0.207054	0.0349504	-0.318403	0.00104639
miR-493	up	SCD	down	-0.206865	0.0351208	0.147828	3.13563e-05	-0.0053556	0.929681	-0.206865	0.0351208	0.0713202	0.474053
miR-891a	down	A2ML1	up	-0.205809	0.0360844	0.0838701	0.0186097	0.0423928	0.484658	-0.205809	0.0360844	0.257071	0.00875814
miR-140	down	CDC25A	up	-0.205541	0.0363328	-0.180975	3.2015e-07	-0.29397	7.28135e-07	-0.205541	0.0363328	-0.230603	0.0191048
miR-10b	down	BUB1	up	-0.204975	0.0368618	-0.421331	3.26578e-35	-0.38286	5.37562e-11	-0.204975	0.0368618	-0.306485	0.00164021
miR-144	down	KCNQ5	up	-0.204925	0.0369081	-0.0274094	0.442575	-0.0988794	0.102413	-0.204925	0.0369081	-0.0872104	0.381053
miR-676	down	PYCARD	up	-0.204889	0.0369424	-0.136075	0.000128599	-0.105629	0.0809217	-0.204889	0.0369424	-0.115694	0.244526
miR-200c	up	TCF7L2	down	-0.204829	0.036999	-0.177487	5.41348e-07	-0.246916	3.58574e-05	-0.204829	0.036999	-0.130469	0.188987
miR-335	down	VPREB3	up	-0.204658	0.03716	0.000497999	0.988871	0.045079	0.457387	-0.204658	0.03716	0.0731114	0.462993
miR-144	down	SIX4	up	-0.204306	0.0374947	-0.0420569	0.238601	-0.0257139	0.671737	-0.204306	0.0374947	0.0255519	0.797796
miR-33a	up	ABCA1	down	-0.20427	0.0375291	-0.0905821	0.0110115	-0.0155226	0.798117	-0.20427	0.0375291	-0.0756982	0.447274
miR-92b	up	TEF	down	-0.204192	0.0376034	-0.126359	0.000380245	0.0312165	0.606911	-0.204192	0.0376034	-0.0935889	0.347065
miR-192	up	BTNL9	down	-0.204175	0.0376202	-0.155762	1.13584e-05	-0.159402	0.00820716	-0.204175	0.0376202	0.129359	0.192811
miR-335	down	TNFRSF9	up	-0.203809	0.0379711	-0.0894227	0.0120847	-0.0901676	0.136553	-0.203809	0.0379711	-0.120247	0.226325
miR-335	down	2018-03-04	up	-0.203671	0.0381047	-0.0560374	0.116233	-0.152095	0.0117093	-0.203671	0.0381047	-0.128528	0.195711
miR-210	up	SCN7A	down	-0.203224	0.0385382	-0.514576	2.03353e-54	-0.502571	6.07412e-19	-0.203224	0.0385382	-0.570314	3.2039e-10
miR-375	up	CRIM1	down	-0.203021	0.0387368	-0.0036453	0.918676	0.117861	0.0513164	-0.203021	0.0387368	-0.0307318	0.757961
miR-4668	up	MEF2C	down	-0.202837	0.0389173	-0.0883256	0.0131843	-0.241956	5.18616e-05	-0.202837	0.0389173	0.0411455	0.679856
miR-19a	up	CFL2	down	-0.202718	0.039035	0.000970519	0.978314	0.00334886	0.955995	-0.202718	0.039035	0.142886	0.149912
miR-148b	up	PRNP	down	-0.202361	0.0393884	-0.28644	2.50181e-16	-0.210971	0.000438286	-0.202361	0.0393884	-0.242584	0.0135526
miR-4668	up	NEGR1	down	-0.202292	0.0394566	-0.00551348	0.877272	-0.0724392	0.23202	-0.202292	0.0394566	0.0478651	0.631139
miR-326	down	MAZ	up	-0.202052	0.039696	-0.012304	0.730368	-0.10466	0.0837611	-0.202052	0.039696	-0.128753	0.194923
miR-335	down	CFB	up	-0.201897	0.0398513	-0.0411711	0.248644	-0.120525	0.0462393	-0.201897	0.0398513	0.0290407	0.770902
miR-204	down	ARPC1B	up	-0.201775	0.0399743	-0.043512	0.222729	0.044998	0.458196	-0.201775	0.0399743	-0.0630863	0.526686
miR-4728	up	NOVA2	down	-0.201736	0.0400131	-0.082043	0.0213455	-0.0902072	0.13638	-0.201736	0.0400131	-0.14727	0.137677
miR-511	down	BAMBI	up	-0.201691	0.0400584	0.0562964	0.114553	0.0113614	0.851495	-0.201691	0.0400584	0.170266	0.0855228
miR-148b	up	LAMC2	down	-0.201194	0.0405618	-0.165264	3.14752e-06	-0.288002	1.24326e-06	-0.201194	0.0405618	0.0542338	0.586375
miR-5683	down	RACGAP1	up	-0.200827	0.0409369	-0.219039	5.27717e-10	-0.265245	8.56765e-06	-0.200827	0.0409369	-0.127379	0.199768
miR-365a	down	SIX4	up	-0.200152	0.0416354	0.0204774	0.566231	0.0756825	0.211726	-0.200152	0.0416354	0.199422	0.0434305

## Sheet: HNSC
miRNA	miRNA regulated status	Target gene	Gene regulate status	r_hc	p_hc	r_early	p_early	r_advanced	p_advanced	r_normal	p_normal	r_tumor	p_tumor
miR-30a	down	CDC20	up	-0.798977	8.00686e-11	-0.166401	0.10895	-0.0155989	0.776388	-0.798977	8.00686e-11	0.113042	0.465025
miR-30a	down	KPNA2	up	-0.798028	8.75148e-11	-0.212585	0.0396781	-0.146807	0.00719859	-0.798028	8.75148e-11	-0.0300194	0.846616
miR-30a	down	DTL	up	-0.79044	1.75291e-10	-0.0485829	0.64193	-0.0030124	0.95626	-0.79044	1.75291e-10	-0.132993	0.389451
miR-183	up	TRIM72	down	-0.775537	6.33507e-10	0.0236998	0.82063	-0.0283916	0.605132	-0.775537	6.33507e-10	-0.0158367	0.918732
miR-183	up	KLHL31	down	-0.763171	1.71244e-09	-0.177619	0.0867712	-0.161957	0.00299367	-0.763171	1.71244e-09	-0.185593	0.227757
miR-30a	down	MYBL2	up	-0.75769	2.61083e-09	-0.246532	0.0166052	-0.085552	0.118637	-0.75769	2.61083e-09	-0.185728	0.227414
miR-96	up	ALPK3	down	-0.751728	4.07984e-09	-0.208888	0.0433325	-0.234704	1.46442e-05	-0.751728	4.07984e-09	-0.309644	0.0408164
miR-495	down	CDK1	up	-0.742381	8.01543e-09	-0.228556	0.026712	-0.212893	8.81051e-05	-0.742381	8.01543e-09	-0.233878	0.126515
miR-495	down	KPNA2	up	-0.729895	1.89143e-08	-0.0438447	0.674774	-0.0556581	0.310505	-0.729895	1.89143e-08	-0.0120578	0.938081
miR-30a	down	FSCN1	up	-0.714864	5.00513e-08	-0.265975	0.00956768	-0.182791	0.000789574	-0.714864	5.00513e-08	-0.189192	0.218708
miR-183	up	IDH2	down	-0.714272	5.1942e-08	-0.201836	0.0510793	-0.0549799	0.316447	-0.714272	5.1942e-08	-0.202593	0.187207
miR-30a	down	SLC7A11	up	-0.710628	6.51233e-08	-0.116724	0.262556	-0.300507	2.12677e-08	-0.710628	6.51233e-08	-0.201374	0.189931
miR-495	down	DEPDC1	up	-0.709865	6.82515e-08	-0.0639184	0.540507	-0.109075	0.0463827	-0.709865	6.82515e-08	0.0869274	0.574746
miR-410	down	CDK1	up	-0.708419	7.45654e-08	-0.32796	0.00125147	-0.267699	6.87243e-07	-0.708419	7.45654e-08	-0.195129	0.204328
miR-183	up	SMYD1	down	-0.705413	8.94798e-08	-0.171789	0.0978024	-0.256595	2.01754e-06	-0.705413	8.94798e-08	-0.200033	0.19296
miR-432	down	CENPA	up	-0.703246	1.01905e-07	-0.177163	0.087597	-0.114409	0.036624	-0.703246	1.01905e-07	-0.0238212	0.878016
miR-944	up	NR3C2	down	-0.702407	1.07132e-07	-0.199347	0.0540713	-0.382531	4.41787e-13	-0.702407	1.07132e-07	-0.410097	0.00569708
miR-21	up	GPD1L	down	-0.697101	1.4644e-07	-0.248682	0.0156534	-0.129251	0.0181176	-0.697101	1.4644e-07	0.0206648	0.89408
miR-31	up	AR	down	-0.694823	1.67121e-07	-0.33484	0.000971254	-0.425579	3.99158e-16	-0.694823	1.67121e-07	-0.530064	0.000215114
miR-30a	down	CBX2	up	-0.694041	1.74828e-07	-0.031622	0.762225	-0.23361	1.60905e-05	-0.694041	1.74828e-07	-0.278728	0.0669295
miR-377	down	CCNB1	up	-0.684059	3.07085e-07	-0.101871	0.328566	-0.113411	0.0383054	-0.684059	3.07085e-07	0.0533279	0.730998
miR-495	down	TOP2A	up	-0.683953	3.08891e-07	-0.279749	0.00631955	-0.0974008	0.0754662	-0.683953	3.08891e-07	-0.0542084	0.726726
miR-3934	up	JADE1	down	-0.683517	3.1643e-07	-0.222857	0.0308506	-0.203378	0.00018248	-0.683517	3.1643e-07	-0.225919	0.140327
miR-183	up	KY	down	-0.680291	3.77698e-07	0.000820225	0.99374	-0.269556	5.71211e-07	-0.680291	3.77698e-07	-0.0295345	0.849066
miR-376c	down	CENPA	up	-0.668553	7.06241e-07	0.0398183	0.703175	-0.0615979	0.261613	-0.668553	7.06241e-07	0.0305914	0.84373
miR-31	up	DMD	down	-0.665135	8.43005e-07	-0.199926	0.0533636	-0.114085	0.0371624	-0.665135	8.43005e-07	0.0415607	0.788806
miR-495	down	CDCA2	up	-0.656699	1.29259e-06	-0.306976	0.00261728	-0.156035	0.00425681	-0.656699	1.29259e-06	-0.15916	0.302096
miR-31	up	PPM1L	down	-0.655023	1.40489e-06	-0.336394	0.00091645	-0.377816	8.96546e-13	-0.655023	1.40489e-06	-0.507003	0.000444439
miR-21	up	CPEB3	down	-0.654222	1.46177e-06	-0.0410477	0.694458	-0.104172	0.0571909	-0.654222	1.46177e-06	0.198766	0.195853
miR-31	up	CXCL12	down	-0.652879	1.56177e-06	-0.318751	0.00174118	-0.248246	4.39168e-06	-0.652879	1.56177e-06	-0.293758	0.0529393
miR-183	up	TMEM170B	down	-0.645422	2.24259e-06	-0.165126	0.111727	-0.176038	0.00123608	-0.645422	2.24259e-06	-0.149643	0.332287
miR-21	up	LYRM7	down	-0.64361	2.44503e-06	-0.182026	0.0791071	-0.160558	0.00325664	-0.64361	2.44503e-06	-0.0348548	0.82228
miR-224	up	LONRF2	down	-0.643459	2.46273e-06	-0.324161	0.00143592	-0.312917	5.07326e-09	-0.643459	2.46273e-06	-0.231533	0.130474
miR-539	down	BUB1	up	-0.642353	2.5953e-06	-0.242409	0.0185714	0.0165109	0.763691	-0.642353	2.5953e-06	0.182849	0.234828
miR-377	down	CDCA4	up	-0.641296	2.72829e-06	-0.00885147	0.932523	-0.050165	0.36075	-0.641296	2.72829e-06	0.0598781	0.699424
miR-21	up	ACAT1	down	-0.640816	2.79062e-06	-0.0168957	0.871597	-0.277076	2.66304e-07	-0.640816	2.79062e-06	-0.247528	0.105239
miR-3934	up	RTN2	down	-0.639927	2.90968e-06	-0.0685083	0.511762	-0.208746	0.000121498	-0.639927	2.90968e-06	-0.208094	0.17526
miR-30a	down	SLC7A5	up	-0.639466	2.97338e-06	-0.231183	0.0249695	-0.30098	2.01612e-08	-0.639466	2.97338e-06	-0.422797	0.00424695
miR-411	down	CENPA	up	-0.637526	3.25521e-06	-0.0966075	0.3543	-0.190952	0.00044974	-0.637526	3.25521e-06	-0.0522233	0.736367
miR-30a	down	IL1A	up	-0.63146	4.30358e-06	-0.0901399	0.387584	-0.14252	0.00910168	-0.63146	4.30358e-06	0.0734815	0.635478
miR-410	down	CYP4F11	up	-0.626438	5.3986e-06	0.202302	0.0505337	0.00604821	0.912313	-0.626438	5.3986e-06	-0.148069	0.337456
miR-30a	down	NDE1	up	-0.620356	7.06672e-06	-0.304912	0.00280642	-0.139725	0.010572	-0.620356	7.06672e-06	0.00436204	0.977581
miR-30a	down	RAB31	up	-0.618631	7.61948e-06	-0.392424	9.15643e-05	-0.0285264	0.603419	-0.618631	7.61948e-06	-0.186704	0.224936
miR-31	up	SYDE2	down	-0.615724	8.64226e-06	-0.428788	1.6191e-05	-0.432931	1.08671e-16	-0.615724	8.64226e-06	-0.682833	3.28587e-07
miR-454	up	SECISBP2L	down	-0.615115	8.8718e-06	-0.322172	0.00154198	-0.394729	6.71377e-14	-0.615115	8.8718e-06	-0.298049	0.0494103
miR-369	down	SPC25	up	-0.613255	9.6086e-06	0.0101233	0.922855	-0.0944687	0.0847327	-0.613255	9.6086e-06	0.100413	0.51664
miR-377	down	CDT1	up	-0.610286	1.09016e-05	-0.201942	0.0509542	-0.164209	0.00261039	-0.610286	1.09016e-05	-0.0377299	0.807887
miR-495	down	HIST1H3G	up	-0.608312	1.18479e-05	-0.0583904	0.576149	-0.0714387	0.192793	-0.608312	1.18479e-05	0.12117	0.433331
miR-369	down	CYP4F11	up	-0.605973	1.30668e-05	0.153041	0.140851	-0.0335786	0.54084	-0.605973	1.30668e-05	-0.0244652	0.874744
miR-654	down	CCNB1	up	-0.605372	1.33978e-05	-0.097613	0.349289	-0.174757	0.00134341	-0.605372	1.33978e-05	0.234396	0.125653
miR-410	down	CHEK1	up	-0.605149	1.35228e-05	-0.210211	0.0419934	-0.0879704	0.108537	-0.605149	1.35228e-05	0.0555979	0.720003
miR-885	down	TRIP13	up	-0.597297	1.86637e-05	-0.214152	0.0382089	-0.0539252	0.325834	-0.597297	1.86637e-05	-0.111133	0.472647
miR-30a	down	CCNF	up	-0.597013	1.88793e-05	-0.245051	0.0172899	0.0327574	0.550789	-0.597013	1.88793e-05	0.184597	0.230305
miR-190a	down	SLC7A11	up	-0.59683	1.90197e-05	0.204235	0.0483247	0.112433	0.0400136	-0.59683	1.90197e-05	0.0565259	0.715524
miR-496	down	PRR11	up	-0.594063	2.12605e-05	0.0163586	0.875646	0.109231	0.0460701	-0.594063	2.12605e-05	0.107984	0.485358
miR-539	down	KPNA2	up	-0.592938	2.22387e-05	-0.163963	0.11431	-0.000608595	0.991159	-0.592938	2.22387e-05	0.126677	0.412559
miR-148a	down	CDC25B	up	-0.592762	2.23946e-05	-0.181448	0.080079	-0.0884671	0.106549	-0.592762	2.23946e-05	-0.42991	0.00358509
miR-377	down	UBE2S	up	-0.591334	2.37047e-05	-0.12501	0.229939	-0.0890573	0.104224	-0.591334	2.37047e-05	-0.0222394	0.886061
miR-21	up	PPM1L	down	-0.591166	2.38631e-05	-0.257377	0.0122689	-0.11091	0.042805	-0.591166	2.38631e-05	0.00577874	0.970303
miR-30a	down	TUBB3	up	-0.588924	2.60739e-05	-0.36716	0.000272519	-0.169838	0.00183995	-0.588924	2.60739e-05	-0.102776	0.506772
miR-654	down	KIF18B	up	-0.588193	2.68343e-05	-0.171464	0.0984488	-0.0880795	0.108098	-0.588193	2.68343e-05	0.0515424	0.739684
miR-495	down	XRCC2	up	-0.586292	2.89087e-05	-0.214885	0.0375369	-0.0977612	0.0743865	-0.586292	2.89087e-05	-0.0883963	0.568275
miR-224	up	MITF	down	-0.58428	3.12621e-05	-0.413116	3.50133e-05	-0.23809	1.09076e-05	-0.58428	3.12621e-05	-0.0832708	0.590999
miR-21	up	PBX1	down	-0.583626	3.20648e-05	-0.259254	0.0116283	-0.0687278	0.210271	-0.583626	3.20648e-05	0.144655	0.348837
miR-19a	up	BMP3	down	-0.579488	3.75932e-05	-0.183298	0.0769987	-0.188239	0.000543671	-0.579488	3.75932e-05	-0.257939	0.0909406
miR-224	up	SYNM	down	-0.576927	4.14366e-05	-0.176397	0.0889974	-0.134574	0.013839	-0.576927	4.14366e-05	-0.274488	0.0713661
miR-432	down	EFNB1	up	-0.576352	4.23471e-05	-0.106529	0.306812	0.111915	0.0409455	-0.576352	4.23471e-05	0.152557	0.322849
miR-18a	up	PLEKHA6	down	-0.576012	4.28951e-05	-0.0474884	0.649459	-0.158465	0.0036894	-0.576012	4.28951e-05	-0.343326	0.0225102
miR-411	down	CEP55	up	-0.573483	4.71721e-05	-0.102846	0.323933	-0.0292554	0.594192	-0.573483	4.71721e-05	0.0977888	0.527714
miR-377	down	LRP8	up	-0.571601	5.06048e-05	-0.042405	0.684879	-0.0108322	0.843648	-0.571601	5.06048e-05	-0.170495	0.268509
miR-183	up	FAM110B	down	-0.570128	5.3449e-05	-0.0525818	0.614734	-0.164929	0.00249775	-0.570128	5.3449e-05	-0.102839	0.506508
miR-210	up	SCN7A	down	-0.567433	5.90319e-05	-0.386368	0.000119896	-0.424688	4.66354e-16	-0.567433	5.90319e-05	-0.370456	0.0133101
miR-432	down	CCNF	up	-0.567042	5.9885e-05	-0.373058	0.000212927	-0.0855725	0.118549	-0.567042	5.9885e-05	0.124262	0.421595
miR-885	down	FEN1	up	-0.566642	6.07682e-05	-0.0940647	0.367168	-0.0101097	0.853956	-0.566642	6.07682e-05	0.0370109	0.811481
miR-21	up	LONRF2	down	-0.566606	6.08495e-05	-0.33054	0.00113875	-0.249254	4.00388e-06	-0.566606	6.08495e-05	0.0334565	0.829302
miR-224	up	KLK1	down	-0.566309	6.15134e-05	0.0245138	0.814578	0.0393554	0.47348	-0.566309	6.15134e-05	0.0213468	0.890606
miR-377	down	CYP4F11	up	-0.565868	6.25129e-05	0.0854142	0.41305	-0.0267707	0.625901	-0.565868	6.25129e-05	-0.0602327	0.697728
miR-183	up	C16orf45	down	-0.565775	6.27245e-05	0.00193401	0.98524	-0.23641	1.26306e-05	-0.565775	6.27245e-05	-0.056987	0.713302
miR-224	up	ZNF135	down	-0.564555	6.55764e-05	-0.284363	0.00547451	-0.356333	1.95531e-11	-0.564555	6.55764e-05	0.0663748	0.668594
miR-431	down	CKAP2L	up	-0.563091	6.9153e-05	-0.170615	0.100151	0.026401	0.630679	-0.563091	6.9153e-05	0.211231	0.168699
miR-655	down	ATAD2	up	-0.56303	6.93076e-05	-0.212393	0.0398613	-0.129442	0.0179457	-0.56303	6.93076e-05	0.159914	0.299781
miR-539	down	MCM4	up	-0.561066	7.43967e-05	-0.288489	0.00480547	-0.0572793	0.296601	-0.561066	7.43967e-05	0.270555	0.0756857
miR-18a	up	NBEA	down	-0.554911	9.26257e-05	-0.235384	0.0223841	-0.414789	2.54598e-15	-0.554911	9.26257e-05	-0.23288	0.12819
miR-93	up	NFIB	down	-0.554431	9.42062e-05	-0.117546	0.259186	-0.049592	0.366268	-0.554431	9.42062e-05	0.0137564	0.929379
let-7c	down	CLEC4E	up	-0.553275	9.81117e-05	-0.112885	0.278681	-0.0282354	0.607119	-0.553275	9.81117e-05	0.0592571	0.702397
miR-3934	up	CACNB2	down	-0.553191	9.84008e-05	-0.311727	0.00222476	-0.189816	0.00048706	-0.553191	9.84008e-05	-0.0286099	0.853738
miR-21	up	LIFR	down	-0.553011	9.90245e-05	-0.06096	0.559446	0.0461237	0.40078	-0.553011	9.90245e-05	0.0635995	0.681702
miR-885	down	BUB1	up	-0.550559	0.000107875	-0.26489	0.00987704	-0.124334	0.0230504	-0.550559	0.000107875	0.168388	0.274558
miR-1293	up	INMT	down	-0.548932	0.000114138	-0.303972	0.00289657	-0.35427	2.59796e-11	-0.548932	0.000114138	-0.314293	0.037733
miR-410	down	CKAP2L	up	-0.548066	0.000117605	-0.20699	0.0453142	0.0092199	0.866684	-0.548066	0.000117605	-0.0805669	0.603146
miR-96	up	SYNM	down	-0.545802	0.000127125	-0.143975	0.166225	-0.113708	0.0377979	-0.545802	0.000127125	-0.295737	0.0512874
miR-93	up	FOXC1	down	-0.545799	0.000127135	0.0404862	0.698434	-0.0665777	0.224924	-0.545799	0.000127135	-0.129953	0.400477
miR-196b	up	PRUNE2	down	-0.54501	0.000130614	-0.264276	0.0100559	-0.247129	4.8633e-06	-0.54501	0.000130614	-0.343412	0.0224743
miR-411	down	KPNA2	up	-0.543546	0.000137299	-0.0721306	0.489644	-0.0775466	0.157352	-0.543546	0.000137299	-0.0327087	0.833063
miR-944	up	LIMCH1	down	-0.542558	0.000141983	0.117482	0.259446	-0.125167	0.0221412	-0.542558	0.000141983	-0.198956	0.195417
miR-96	up	UBE2D4	down	-0.541429	0.000147516	0.151323	0.145421	0.0314336	0.567012	-0.541429	0.000147516	0.092479	0.550469
miR-379	down	HIST1H3H	up	-0.539295	0.000158504	0.0529971	0.611939	-0.0368212	0.502452	-0.539295	0.000158504	0.111841	0.469812
miR-655	down	IGF2BP3	up	-0.538167	0.000164608	-0.186645	0.0716645	-0.0903775	0.0991696	-0.538167	0.000164608	-0.152915	0.321701
miR-655	down	CYP4F11	up	-0.537496	0.000168342	0.0565917	0.587977	-0.0661449	0.22796	-0.537496	0.000168342	-0.367501	0.0141236
miR-224	up	C8orf46	down	-0.536274	0.000175334	-0.397557	7.25624e-05	-0.0204833	0.709163	-0.536274	0.000175334	-0.299837	0.0479972
miR-21	up	SESN1	down	-0.535127	0.00018214	-0.156971	0.130811	-0.0594112	0.278957	-0.535127	0.00018214	0.161313	0.295518
miR-210	up	COL14A1	down	-0.53396	0.0001893	-0.354031	0.000464153	-0.477246	2.11104e-20	-0.53396	0.0001893	-0.140521	0.362927
miR-21	up	JPH1	down	-0.533764	0.000190533	-0.154964	0.135869	-0.00954739	0.861995	-0.533764	0.000190533	0.0139656	0.928307
miR-93	up	ENPP5	down	-0.530449	0.000212429	0.150646	0.147251	0.0603307	0.271571	-0.530449	0.000212429	0.109221	0.480345
miR-93	up	OSR1	down	-0.529657	0.000217983	0.081937	0.432394	0.0113234	0.836655	-0.529657	0.000217983	0.148175	0.337105
miR-136	down	HOXA9	up	-0.527668	0.000232521	-0.0650967	0.533052	-0.0384654	0.483549	-0.527668	0.000232521	-0.176916	0.250625
miR-410	down	XRCC3	up	-0.526729	0.000239689	-0.260063	0.0113614	-0.161256	0.00312282	-0.526729	0.000239689	-0.118055	0.445333
miR-19a	up	SECISBP2L	down	-0.524404	0.000258288	-0.222851	0.0308545	-0.370537	2.6139e-12	-0.524404	0.000258288	-0.203704	0.184749
miR-18a	up	DDAH1	down	-0.524059	0.000261161	-0.0122032	0.907069	-0.27298	4.04673e-07	-0.524059	0.000261161	-0.160623	0.297614
miR-3934	up	IGFBP5	down	-0.523515	0.000265743	-0.172546	0.0963103	-0.153121	0.00504011	-0.523515	0.000265743	-0.166869	0.278973
miR-21	up	DMD	down	-0.522623	0.000273415	-0.281449	0.00599564	0.00926176	0.866085	-0.522623	0.000273415	0.0840015	0.587735
miR-411	down	HIST1H3H	up	-0.521806	0.000280612	0.0705881	0.499	-0.0492886	0.369212	-0.521806	0.000280612	0.029538	0.849048
miR-224	up	RAB9B	down	-0.521608	0.000282383	-0.309276	0.00242014	-0.203712	0.000177965	-0.521608	0.000282383	-0.0726456	0.639339
miR-21	up	LIMCH1	down	-0.521229	0.000285802	-0.0302069	0.77257	0.125943	0.021322	-0.521229	0.000285802	0.249081	0.103004
miR-30e	down	IFNE	up	-0.521121	0.00028678	-0.247827	0.016026	-0.220342	4.86888e-05	-0.521121	0.00028678	-0.0753915	0.626693
miR-375	down	PROCR	up	-0.5195	0.000301869	-0.0895884	0.390507	-0.15234	0.00527107	-0.5195	0.000301869	-0.11225	0.46818
miR-190a	down	PCDH7	up	-0.518029	0.000316184	0.0278894	0.789599	0.00949729	0.862712	-0.518029	0.000316184	0.0299255	0.847091
miR-18a	up	ZNF132	down	-0.517738	0.000319077	-0.168223	0.105075	-0.201337	0.000212424	-0.517738	0.000319077	-0.418042	0.00474684
miR-30a	down	LY6K	up	-0.517398	0.000322499	-0.247279	0.0162689	-0.0179247	0.744134	-0.517398	0.000322499	0.295573	0.0514228
miR-655	down	E2F7	up	-0.51705	0.000326033	-0.193879	0.0611539	-0.16936	0.00189621	-0.51705	0.000326033	-0.0295595	0.848939
miR-19a	up	ITPR1	down	-0.516778	0.000328829	-0.381345	0.000149343	-0.366387	4.75448e-12	-0.516778	0.000328829	-0.256526	0.0927881
miR-93	up	TMEM200C	down	-0.515819	0.000338822	-0.100612	0.33461	-0.0121782	0.824517	-0.515819	0.000338822	0.276278	0.0694663
miR-1293	up	NFIX	down	-0.515402	0.000343257	-0.189234	0.0677473	-0.236779	1.22314e-05	-0.515402	0.000343257	-0.304687	0.0443274
miR-375	down	FAM89A	up	-0.514892	0.000348754	0.14948	0.150445	0.0429906	0.433569	-0.514892	0.000348754	-0.162778	0.291095
miR-615	up	MYH14	down	-0.514686	0.000350995	-0.300226	0.00328219	-0.214352	7.85645e-05	-0.514686	0.000350995	-0.354708	0.0181511
miR-100	down	EMX1	up	-0.514074	0.000357728	0.0806394	0.439743	-0.0296106	0.589719	-0.514074	0.000357728	0.0625492	0.686687
miR-495	down	KIAA1549L	up	-0.511982	0.000381645	0.0284594	0.785401	0.198706	0.000257813	-0.511982	0.000381645	0.0698293	0.652414
miR-503	up	CCNG2	down	-0.511348	0.000389166	-0.098369	0.345552	-0.00810556	0.882673	-0.511348	0.000389166	-0.151713	0.325566
miR-93	up	PPM1H	down	-0.511333	0.000389345	0.071777	0.49178	0.00456894	0.933702	-0.511333	0.000389345	0.159283	0.301716
miR-19a	up	ENPP4	down	-0.508932	0.000419084	-0.354762	0.000450869	-0.381621	5.06897e-13	-0.508932	0.000419084	-0.378051	0.0113999
miR-21	up	NFIA	down	-0.508767	0.000421205	-0.120419	0.247641	-0.184073	0.00072389	-0.508767	0.000421205	-0.134351	0.384587
miR-139	down	PTGFRN	up	-0.508635	0.000422903	0.0681782	0.513803	0.197285	0.000285944	-0.508635	0.000422903	0.295982	0.0510856
miR-196b	up	KBTBD12	down	-0.508572	0.000423718	-0.212921	0.0393589	-0.231424	1.93987e-05	-0.508572	0.000423718	-0.340294	0.0238089
miR-21	up	EPM2A	down	-0.506964	0.000444962	-0.161761	0.119323	-0.0141436	0.796771	-0.506964	0.000444962	0.143711	0.352025
miR-615	up	RGMA	down	-0.506897	0.000445877	-0.0713829	0.494167	-0.224741	3.39747e-05	-0.506897	0.000445877	-0.3692	0.0136509
miR-21	up	CCNG1	down	-0.506597	0.00044995	-0.000725837	0.99446	-0.0779421	0.155239	-0.506597	0.00044995	0.134033	0.385721
miR-30e	down	RAB31	up	-0.505338	0.000467427	-0.214674	0.0377291	-0.0696094	0.204467	-0.505338	0.000467427	-0.0512032	0.741338
miR-375	down	MYBL1	up	-0.500416	0.000541754	-0.308052	0.00252334	-0.0966806	0.0776624	-0.500416	0.000541754	0.00408416	0.979009
miR-433	down	TYMS	up	-0.49781	0.000585264	-0.116644	0.262882	-0.120324	0.0278952	-0.49781	0.000585264	-0.024918	0.872445
miR-455	up	PGPEP1	down	-0.495733	0.000622147	-0.569056	2.17411e-09	-0.404838	1.32659e-14	-0.495733	0.000622147	-0.495745	0.000621928
miR-210	up	MRO	down	-0.492495	0.00068381	-0.416441	2.98229e-05	-0.361949	8.93057e-12	-0.492495	0.00068381	-0.243897	0.110611
miR-21	up	TMEM56	down	-0.491527	0.000703285	-0.163911	0.114426	-0.231118	1.99111e-05	-0.491527	0.000703285	-0.232603	0.128656
miR-224	up	LDHD	down	-0.489543	0.000744749	0.105482	0.311619	0.204383	0.000169228	-0.489543	0.000744749	0.121745	0.431136
miR-93	up	GRIK3	down	-0.485322	0.000840338	0.0703498	0.500454	0.000139808	0.997969	-0.485322	0.000840338	0.19306	0.20926
miR-210	up	LONRF2	down	-0.484671	0.000856013	-0.317786	0.00180144	-0.339611	1.84439e-10	-0.484671	0.000856013	-0.170022	0.26986
miR-93	up	SLC25A23	down	-0.484258	0.000866078	-0.0155681	0.88161	0.16475	0.00252525	-0.484258	0.000866078	0.0462426	0.765651
miR-96	up	TMEM170B	down	-0.482237	0.000916974	-0.375682	0.000190502	-0.226437	2.9519e-05	-0.482237	0.000916974	-0.129421	0.402424
miR-30a	down	IFNE	up	-0.482012	0.000922795	-0.0695057	0.505621	-0.12849	0.0188148	-0.482012	0.000922795	0.065313	0.673598
miR-410	down	HAUS8	up	-0.481986	0.000923468	-0.208537	0.0436929	-0.213935	8.1189e-05	-0.481986	0.000923468	-0.174021	0.258586
miR-299	down	POLQ	up	-0.481783	0.000928764	-0.357895	0.000397758	-0.313998	4.46369e-09	-0.481783	0.000928764	-0.163609	0.288604
miR-378a	down	GALNT6	up	-0.480906	0.000951916	-0.32076	0.00162157	-0.191987	0.000418058	-0.480906	0.000951916	-0.172806	0.261978
miR-885	down	AURKA	up	-0.480244	0.000969735	-0.133928	0.198124	-0.107765	0.0490869	-0.480244	0.000969735	0.138602	0.369584
miR-3934	up	PPM1L	down	-0.479569	0.000988192	-0.193937	0.0610753	-0.158485	0.00368495	-0.479569	0.000988192	-0.132086	0.392724
miR-301a	up	SECISBP2L	down	-0.477784	0.00103859	-0.166682	0.108345	-0.307125	9.98593e-09	-0.477784	0.00103859	-0.233705	0.126805
miR-196b	up	PBX1	down	-0.476843	0.00106604	0.286932	0.0050489	0.14346	0.00864961	-0.476843	0.00106604	0.185987	0.226754
miR-885	down	CENPK	up	-0.47682	0.00106675	-0.208283	0.0439565	0.0350715	0.522987	-0.47682	0.00106675	0.0920072	0.552513
miR-21	up	CFL2	down	-0.475843	0.00109596	0.163149	0.116142	0.0997522	0.0686452	-0.475843	0.00109596	0.0962152	0.534409
miR-378a	down	FBLIM1	up	-0.475415	0.00110899	-0.273345	0.00768312	-0.264655	9.27798e-07	-0.475415	0.00110899	-0.263058	0.0844871
miR-130b	up	PLCL1	down	-0.474532	0.00113628	-0.13612	0.190816	-0.0647104	0.238228	-0.474532	0.00113628	-0.264093	0.0832255
miR-193b	up	SLC26A2	down	-0.473598	0.00116583	-0.350664	0.000530159	-0.278991	2.18453e-07	-0.473598	0.00116583	-0.423815	0.00414619
miR-454	up	SHISA9	down	-0.472951	0.00118669	-0.0579036	0.579339	-0.100192	0.0674288	-0.472951	0.00118669	-0.101777	0.510933
miR-21	up	SPRY2	down	-0.472511	0.00120105	-0.147159	0.156956	-0.0500469	0.361883	-0.472511	0.00120105	0.00784649	0.959684
miR-3934	up	CD300LG	down	-0.472012	0.00121755	-0.151889	0.143905	-0.197361	0.000284374	-0.472012	0.00121755	0.0724164	0.640398
miR-21	up	KLF9	down	-0.47192	0.0012206	-0.0840293	0.420693	0.0799404	0.14489	-0.47192	0.0012206	0.0654722	0.672847
miR-3934	up	BHMT2	down	-0.471284	0.00124195	-0.155796	0.133754	-0.276411	2.85157e-07	-0.471284	0.00124195	-0.17366	0.259589
miR-30e	down	IL1A	up	-0.471248	0.00124317	-0.2438	0.0178868	-0.195795	0.000318493	-0.471248	0.00124317	-0.0505844	0.744357
miR-31	up	TACC2	down	-0.471143	0.00124672	0.160577	0.122086	-0.0348746	0.525324	-0.471143	0.00124672	-0.195198	0.204163
miR-4746	up	SCN2B	down	-0.470766	0.00125959	-0.317862	0.00179663	-0.311515	5.98511e-09	-0.470766	0.00125959	-0.11841	0.443956
miR-450a-2	up	SCIN	down	-0.470362	0.0012735	-0.281517	0.00598304	-0.175869	0.00124981	-0.470362	0.0012735	-0.14597	0.344424
miR-224	up	PCSK2	down	-0.469503	0.00130353	-0.0592679	0.570419	-0.126048	0.0212128	-0.469503	0.00130353	-0.0583398	0.706796
miR-130b	up	EMX2	down	-0.469091	0.00131816	-0.0925495	0.374971	-0.112786	0.0393897	-0.469091	0.00131816	-0.201156	0.190421
miR-379	down	NETO2	up	-0.468731	0.00133106	-0.0485762	0.641977	0.0898245	0.101263	-0.468731	0.00133106	0.273018	0.0729568
miR-143	down	NETO2	up	-0.467091	0.00139124	0.176891	0.0880909	0.0402939	0.462988	-0.467091	0.00139124	0.152319	0.323615
miR-4746	up	INMT	down	-0.466901	0.00139838	-0.00788846	0.939849	-0.0726449	0.185368	-0.466901	0.00139838	-0.108814	0.481993
miR-130b	up	MYOCD	down	-0.466055	0.00143048	-0.0862362	0.408552	-0.0919483	0.0934109	-0.466055	0.00143048	0.00370153	0.980975
miR-767	up	TSHZ2	down	-0.466011	0.00143218	-0.198729	0.0548365	-0.0768182	0.161301	-0.466011	0.00143218	-0.245191	0.108673
miR-30a	down	SLC38A5	up	-0.465111	0.00146711	-0.22367	0.0302286	0.0175604	0.749158	-0.465111	0.00146711	0.221984	0.147555
miR-30e	down	ATP8B3	up	-0.464392	0.00149555	-0.189108	0.0679336	-0.127549	0.0197097	-0.464392	0.00149555	0.133863	0.386329
miR-30a	down	TPBG	up	-0.464367	0.00149656	-0.145836	0.160758	-0.0174613	0.750527	-0.464367	0.00149656	0.199466	0.19425
miR-31	up	C15orf52	down	-0.462282	0.00158193	0.190191	0.0663443	0.18454	0.000701205	-0.462282	0.00158193	0.383288	0.0102238
miR-130b	up	HADHB	down	-0.462031	0.0015925	-0.198575	0.0550281	-0.178662	0.00104047	-0.462031	0.0015925	-0.0126384	0.935105
miR-3934	up	ASB16	down	-0.461955	0.00159567	-0.04006	0.701457	-0.219518	5.20426e-05	-0.461955	0.00159567	-0.266617	0.0802136
miR-615	up	TRIP10	down	-0.461021	0.00163559	-0.148643	0.152768	-0.120954	0.0270816	-0.461021	0.00163559	-0.119317	0.44045
miR-655	down	CCNF	up	-0.460306	0.00166676	-0.126379	0.224836	-0.0982929	0.0728164	-0.460306	0.00166676	0.211186	0.168791
miR-21	up	TGFBR3	down	-0.458769	0.00173549	-0.442059	8.17238e-06	-0.267783	6.81503e-07	-0.458769	0.00173549	-0.124559	0.42048
miR-375	down	LIMD2	up	-0.45865	0.00174092	-0.22733	0.0275601	-0.0927865	0.0904495	-0.45865	0.00174092	-0.28211	0.0635509
miR-3934	up	NPHP1	down	-0.45767	0.00178621	-0.174214	0.0930863	-0.164265	0.00260154	-0.45767	0.00178621	-0.217005	0.157088
miR-93	up	FAM174B	down	-0.457545	0.00179205	0.113571	0.275754	-0.0144947	0.79184	-0.457545	0.00179205	0.289818	0.0563559
miR-130b	up	CFL2	down	-0.456006	0.00186545	0.0710787	0.496014	-0.111954	0.0408757	-0.456006	0.00186545	-0.19151	0.213012
miR-495	down	RAB31	up	-0.455817	0.00187461	0.0907619	0.384304	0.103452	0.0589408	-0.455817	0.00187461	-0.135973	0.378818
miR-183	up	KCNT2	down	-0.454796	0.001925	-0.0130507	0.900647	-0.234131	1.53854e-05	-0.454796	0.001925	-0.178092	0.247438
miR-224	up	NDNF	down	-0.454571	0.00193625	-0.107252	0.303524	-0.229443	2.29439e-05	-0.454571	0.00193625	0.104414	0.499986
miR-93	up	KCNMB1	down	-0.454459	0.00194189	-0.256288	0.0126542	-0.280847	1.80048e-07	-0.454459	0.00194189	-0.143796	0.351736
miR-93	up	KCNB1	down	-0.454186	0.00195564	-0.12411	0.233338	-0.25018	3.67638e-06	-0.454186	0.00195564	-0.107006	0.489344
miR-21	up	ZNF132	down	-0.45401	0.00196458	-0.249604	0.0152596	-0.0822839	0.133433	-0.45401	0.00196458	-0.0858142	0.579673
miR-196b	up	TGFBR3	down	-0.453943	0.001968	-0.0264886	0.79994	0.0213142	0.697931	-0.453943	0.001968	0.0139023	0.928631
miR-378a	down	C20orf144	up	-0.452489	0.00204323	0.0332533	0.75035	-0.0178357	0.74536	-0.452489	0.00204323	0.064598	0.676975
miR-655	down	ZNF695	up	-0.451973	0.00207057	-0.0345229	0.74115	-0.00566881	0.917793	-0.451973	0.00207057	0.0282257	0.855681
miR-19a	up	ENPP5	down	-0.451501	0.00209581	-0.0907494	0.38437	-0.19254	0.000401997	-0.451501	0.00209581	-0.221809	0.147881
miR-30a	down	PTGFRN	up	-0.451115	0.00211667	-0.227474	0.027459	-0.070241	0.200379	-0.451115	0.00211667	-0.0273394	0.860168
miR-375	down	SP110	up	-0.450578	0.00214598	-0.222613	0.031039	-0.0813203	0.138056	-0.450578	0.00214598	-0.00759529	0.960974
miR-93	up	SCN7A	down	-0.449762	0.00219126	-0.18475	0.074646	-0.414408	2.71492e-15	-0.449762	0.00219126	-0.0823266	0.595228
miR-190a	down	SLC16A1	up	-0.449602	0.0022002	-0.0670548	0.520779	0.127471	0.0197846	-0.449602	0.0022002	0.0262837	0.865516
miR-499a	down	PTGFRN	up	-0.449468	0.00220777	0.0078313	0.940284	-0.0103181	0.850979	-0.449468	0.00220777	0.0741907	0.63221
miR-19a	up	TF	down	-0.448506	0.00226252	-0.0504331	0.629286	-0.064586	0.239133	-0.448506	0.00226252	-0.213059	0.164957
miR-3934	up	TRIM72	down	-0.447881	0.00229877	-0.167437	0.106733	-0.178278	0.00106721	-0.447881	0.00229877	-0.422471	0.00427975
miR-19a	up	NFIA	down	-0.447172	0.00234049	-0.120292	0.248144	-0.110186	0.0441876	-0.447172	0.00234049	0.0169588	0.912995
miR-21	up	SATB1	down	-0.447013	0.00234994	-0.243229	0.0181654	-0.0174395	0.750828	-0.447013	0.00234994	0.24575	0.107844
miR-130b	up	ASB16	down	-0.446443	0.0023841	0.0299449	0.774491	-0.0293549	0.592938	-0.446443	0.0023841	-0.0921074	0.552078
miR-18a	up	CSRNP3	down	-0.445185	0.002461	-0.0996179	0.339432	-0.333003	4.31799e-10	-0.445185	0.002461	-0.111434	0.47144
miR-193b	up	FOXC1	down	-0.444302	0.00251632	-0.125657	0.227519	0.0354331	0.518708	-0.444302	0.00251632	0.0615362	0.691507
miR-411	down	NETO2	up	-0.44418	0.00252405	-0.154525	0.136994	0.0587845	0.284068	-0.44418	0.00252405	0.128247	0.406743
miR-210	up	DDAH1	down	-0.443139	0.0025908	-0.240034	0.0197929	-0.307343	9.73693e-09	-0.443139	0.0025908	-0.0267233	0.863288
miR-190a	down	LRP8	up	-0.44298	0.00260111	0.0794878	0.446324	0.0403791	0.462042	-0.44298	0.00260111	-0.0628402	0.685304
miR-96	up	RECK	down	-0.441602	0.0026922	-0.219528	0.0335087	-0.340607	1.6195e-10	-0.441602	0.0026922	0.0131265	0.932605
miR-30a	down	CDK6	up	-0.440947	0.00273652	-0.132031	0.20461	-0.0354163	0.518907	-0.440947	0.00273652	0.143695	0.352079
let-7c	down	SLC20A1	up	-0.440243	0.00278479	-0.37641	0.000184679	-0.22731	2.74457e-05	-0.440243	0.00278479	-0.418616	0.00468396
miR-143	down	VSIG1	up	-0.439885	0.00280967	-0.0780779	0.454456	0.0175411	0.749425	-0.439885	0.00280967	-0.0555544	0.720213
miR-19a	up	TNFRSF11A	down	-0.439553	0.00283287	-0.170298	0.100793	-0.178644	0.0010417	-0.439553	0.00283287	-0.0721694	0.641542
miR-21	up	ZBTB47	down	-0.439061	0.0028676	0.128921	0.215573	0.147452	0.00694546	-0.439061	0.0028676	0.328704	0.0293658
miR-204	down	SPIB	up	-0.438607	0.00289993	0.217325	0.0353723	0.209924	0.000110964	-0.438607	0.00289993	0.286485	0.0593823
miR-96	up	ABCA6	down	-0.438281	0.0029234	-0.260549	0.0112035	-0.369459	3.05621e-12	-0.438281	0.0029234	-0.11628	0.452254
miR-136	down	CENPN	up	-0.435024	0.00316686	-0.17256	0.0962825	-0.054124	0.324051	-0.435024	0.00316686	-0.0595507	0.70099
miR-21	up	SECISBP2L	down	-0.434795	0.00318462	-0.0726448	0.486546	-0.00168026	0.975594	-0.434795	0.00318462	0.36653	0.0144
miR-190a	down	HOXD10	up	-0.433342	0.00329939	0.0853273	0.413527	-0.00561816	0.918525	-0.433342	0.00329939	0.176211	0.252547
miR-187	up	FOS	down	-0.431922	0.00341506	0.0539238	0.605721	0.149331	0.00625259	-0.431922	0.00341506	0.014724	0.924425
miR-130b	up	FYCO1	down	-0.430732	0.00351476	-0.466571	2.13865e-06	-0.349904	4.70706e-11	-0.430732	0.00351476	-0.385793	0.00969912
miR-5683	down	SLC7A11	up	-0.430137	0.00356553	-0.0646446	0.535906	0.0202623	0.71216	-0.430137	0.00356553	-0.206297	0.179102
miR-19a	up	NFIB	down	-0.429547	0.0036165	-0.189295	0.0676564	-0.200231	0.000230498	-0.429547	0.0036165	-0.0214403	0.89013
miR-376a-2	down	E2F7	up	-0.429438	0.00362603	-0.254302	0.0133847	-0.0651528	0.235027	-0.429438	0.00362603	0.0743496	0.631479
miR-454	up	MYH11	down	-0.428053	0.00374855	-0.245602	0.0170326	-0.353775	2.78023e-11	-0.428053	0.00374855	-0.135298	0.381211
miR-139	down	HLA-A	up	-0.428032	0.00375042	-0.0592869	0.570295	0.149992	0.00602381	-0.428032	0.00375042	0.20471	0.182542
miR-30a	down	ATP8B3	up	-0.427924	0.00376009	-0.125319	0.22878	-0.0614319	0.262903	-0.427924	0.00376009	0.0262717	0.865577
miR-210	up	MITF	down	-0.426949	0.00384873	-0.338513	0.000846302	-0.394721	6.72246e-14	-0.426949	0.00384873	-0.407254	0.00607502
miR-487b	down	RAB31	up	-0.425137	0.00401835	-0.0892874	0.392107	0.115444	0.0349478	-0.425137	0.00401835	0.0584446	0.706293
miR-196b	up	BEST3	down	-0.424958	0.00403543	-0.394559	8.3159e-05	-0.279578	2.05542e-07	-0.424958	0.00403543	-0.42352	0.00417516
miR-93	up	ACADSB	down	-0.424448	0.00408454	0.0165187	0.874439	0.064845	0.23725	-0.424448	0.00408454	0.114434	0.45951
miR-4652	up	TLX1	down	-0.424157	0.00411272	-0.0716899	0.492307	0.0996917	0.0688142	-0.424157	0.00411272	0.1818	0.23757
miR-21	up	MKNK2	down	-0.423774	0.00415022	0.00913769	0.930346	-0.109037	0.0464594	-0.423774	0.00415022	0.0967471	0.532141
miR-21	up	RECK	down	-0.423276	0.00419925	-0.0534719	0.608749	0.139669	0.0106031	-0.423276	0.00419925	0.195508	0.203432
let-7c	down	SOCS1	up	-0.423012	0.0042255	-0.243532	0.0180169	0.011132	0.839378	-0.423012	0.0042255	-0.00206354	0.989393
miR-125b-1	down	PRNP	up	-0.423011	0.00422565	-0.219312	0.0336875	-0.249386	3.95534e-06	-0.423011	0.00422565	-0.0810923	0.600777
miR-21	up	BOC	down	-0.422113	0.00431599	-0.20533	0.0471084	0.0520972	0.342526	-0.422113	0.00431599	0.110685	0.474445
miR-31	up	FOXC1	down	-0.421115	0.0044183	-0.189736	0.0670077	0.0503685	0.358803	-0.421115	0.0044183	-0.0526938	0.734079
miR-30e	down	CBX2	up	-0.421008	0.00442936	-0.039476	0.705608	-0.080172	0.143725	-0.421008	0.00442936	-0.0644559	0.677647
miR-30e	down	MYBL2	up	-0.420746	0.00445665	-0.0673652	0.518846	-0.0997955	0.0685247	-0.420746	0.00445665	-0.0792253	0.609213
miR-944	up	SPRY1	down	-0.420072	0.00452754	0.0290233	0.781254	-0.14498	0.00796131	-0.420072	0.00452754	-0.382473	0.0103997
miR-410	down	SLC7A11	up	-0.419902	0.00454557	0.116044	0.265366	0.0853441	0.119538	-0.419902	0.00454557	-0.0523516	0.735743
miR-454	up	NFIB	down	-0.419211	0.00461942	-0.0404057	0.699005	-0.0593362	0.279566	-0.419211	0.00461942	0.176853	0.250796
miR-375	down	COL12A1	up	-0.416485	0.00492138	0.0376721	0.718484	-0.203338	0.000183028	-0.416485	0.00492138	-0.419521	0.00458615
miR-377	down	CBX2	up	-0.41632	0.00494017	0.207325	0.044959	-0.0158077	0.773477	-0.41632	0.00494017	0.0217841	0.888378
miR-193b	up	GNE	down	-0.416086	0.00496692	-0.354271	0.000459753	-0.219554	5.18935e-05	-0.416086	0.00496692	-0.209269	0.172782
miR-224	up	SLC7A14	down	-0.414759	0.00512128	-0.279562	0.00635611	-0.0753004	0.169766	-0.414759	0.00512128	-0.178318	0.246829
miR-21	up	DDAH1	down	-0.414138	0.00519495	-0.356919	0.00041366	-0.152426	0.00524526	-0.414138	0.00519495	-0.0245761	0.874181
miR-93	up	STAC2	down	-0.413959	0.00521627	-0.0540072	0.605163	-0.0967998	0.0772954	-0.413959	0.00521627	0.0916674	0.553987
miR-148a	down	AURKB	up	-0.412839	0.005352	0.0951735	0.361522	-0.0630295	0.250667	-0.412839	0.005352	-0.241664	0.114017
miR-30a	down	SERPINE2	up	-0.411778	0.00548328	-0.0211722	0.839488	0.108711	0.0471224	-0.411778	0.00548328	0.106463	0.491563
miR-210	up	GMPR	down	-0.410516	0.00564311	-0.232591	0.0240759	-0.424076	5.18807e-16	-0.410516	0.00564311	-0.327868	0.0298048
miR-378a	down	ARHGEF39	up	-0.408971	0.00584423	0.0500647	0.631796	0.00547594	0.920581	-0.408971	0.00584423	-0.0455347	0.76914
miR-424	up	TTC39A	down	-0.408724	0.00587704	0.0576584	0.580949	-0.163055	0.00280074	-0.408724	0.00587704	-0.327902	0.0297873
miR-885	down	CCNF	up	-0.40827	0.0059375	-0.289485	0.0046553	-0.0190914	0.728116	-0.40827	0.0059375	0.177905	0.247944
miR-130b	up	MLXIPL	down	-0.408172	0.00595075	0.0950748	0.362023	0.258877	1.62348e-06	-0.408172	0.00595075	0.310366	0.0403247
miR-455	up	BMP3	down	-0.407803	0.00600043	-0.392635	9.07016e-05	-0.320539	2.03454e-09	-0.407803	0.00600043	-0.458813	0.00173349
miR-375	down	NETO2	up	-0.406537	0.00617377	0.0282319	0.787076	-0.05206	0.342871	-0.406537	0.00617377	-0.253433	0.0969329
miR-21	up	C15orf52	down	-0.405516	0.00631672	-0.0972468	0.351109	0.034814	0.526044	-0.405516	0.00631672	0.0677863	0.661964
miR-19a	up	KIT	down	-0.405418	0.00633064	-0.443103	7.73513e-06	-0.348053	6.03971e-11	-0.405418	0.00633064	-0.290482	0.0557686
miR-130b	up	SMTNL2	down	-0.403954	0.00654096	-0.146557	0.158678	-0.0310029	0.572339	-0.403954	0.00654096	-0.224119	0.1436
miR-29c	down	COL7A1	up	-0.403347	0.00663005	-0.20828	0.0439588	-0.20976	0.000112381	-0.403347	0.00663005	-0.162207	0.292814
miR-454	up	IGFBP5	down	-0.40323	0.00664727	-0.316149	0.00190798	-0.34872	5.5222e-11	-0.40323	0.00664727	-0.31996	0.0342355
miR-143	down	F2	up	-0.403001	0.00668127	-0.00564511	0.956936	-0.126017	0.0212447	-0.403001	0.00668127	-0.0605596	0.696166
miR-18a	up	FAM107A	down	-0.402952	0.00668852	-0.440653	8.7983e-06	-0.284946	1.16894e-07	-0.402952	0.00668852	-0.423327	0.00419426
let-7c	down	NPTX1	up	-0.402193	0.00680205	0.0880276	0.398848	-0.0849175	0.121404	-0.402193	0.00680205	0.151443	0.326438
miR-148a	down	KIF2C	up	-0.401754	0.00686862	-0.0267771	0.797807	-0.1196	0.0288574	-0.401754	0.00686862	-0.336151	0.0256849
miR-767	up	NWD1	down	-0.400902	0.00699922	-0.123928	0.234031	-0.167389	0.00214523	-0.400902	0.00699922	-0.0562809	0.716705
miR-30a	down	RHOF	up	-0.400848	0.00700757	-0.284307	0.00548417	-0.0192675	0.725709	-0.400848	0.00700757	-0.129618	0.401702
miR-378a	down	WNT7B	up	-0.400321	0.00708953	-0.011977	0.908785	0.148203	0.00666045	-0.400321	0.00708953	0.106294	0.492257
miR-3662	up	NFIA	down	-0.399089	0.00728422	-0.204862	0.0476257	-0.120581	0.0275602	-0.399089	0.00728422	0.128038	0.407513
miR-411	down	CLSPN	up	-0.39893	0.00730971	-0.203793	0.0488223	0.101657	0.0634976	-0.39893	0.00730971	0.129883	0.400735
miR-30e	down	SLC7A5	up	-0.398842	0.00732383	-0.249649	0.0152408	-0.263342	1.05478e-06	-0.398842	0.00732383	-0.246963	0.106062
miR-125b-2	down	AGTRAP	up	-0.397589	0.0075277	-0.0459747	0.65993	-0.220143	4.94812e-05	-0.397589	0.0075277	-0.0472411	0.760738
miR-21	up	FAXDC2	down	-0.397212	0.00758997	-0.161887	0.119032	0.0257484	0.639154	-0.397212	0.00758997	0.338973	0.0243943
miR-140	down	MMP13	up	-0.396404	0.00772492	-0.03162	0.76224	0.151604	0.00549745	-0.396404	0.00772492	0.18313	0.234097
miR-21	up	OSR1	down	-0.396247	0.00775136	-0.351368	0.000515682	-0.102459	0.0614255	-0.396247	0.00775136	-0.0710438	0.646763
miR-21	up	NFIB	down	-0.395246	0.00792206	-0.187881	0.0697726	-0.162216	0.00294698	-0.395246	0.00792206	-0.239668	0.117127
miR-377	down	HIST1H2BD	up	-0.395068	0.00795261	-0.0104397	0.920451	-0.01365	0.803717	-0.395068	0.00795261	0.0164605	0.915542
miR-3934	up	STAC2	down	-0.393686	0.0081944	-0.315379	0.00196005	-0.193913	0.000364566	-0.393686	0.0081944	0.179829	0.242783
miR-29c	down	FJX1	up	-0.393652	0.00820027	-0.197237	0.05672	-0.268743	6.19487e-07	-0.393652	0.00820027	-0.339664	0.0240864
miR-30a	down	CELSR3	up	-0.393507	0.00822604	0.0224897	0.829646	-0.0816911	0.136263	-0.393507	0.00822604	-0.0179368	0.907999
miR-450a-1	up	MTMR10	down	-0.393136	0.00829226	-0.0953796	0.360478	-0.0631426	0.249816	-0.393136	0.00829226	0.168343	0.274688
miR-30a	down	SLC16A1	up	-0.392919	0.00833104	-0.408187	4.42787e-05	-0.19516	0.000333389	-0.392919	0.00833104	0.058373	0.706637
miR-29c	down	SLC16A1	up	-0.392454	0.00841511	-0.39306	8.8983e-05	-0.202552	0.000194076	-0.392454	0.00841511	-0.467573	0.00137331
miR-6510	down	FGFR4	up	-0.392436	0.00841838	-0.0330365	0.751926	-0.126291	0.0209627	-0.392436	0.00841838	-0.200781	0.191265
miR-30e	down	LY6K	up	-0.391886	0.00851842	-0.0479078	0.646571	-0.151354	0.00557619	-0.391886	0.00851842	0.32581	0.0309095
miR-18a	up	CRY2	down	-0.391674	0.00855742	-0.166459	0.108826	-0.326333	9.9846e-10	-0.391674	0.00855742	-0.198506	0.19645
miR-450a-1	up	ADIPOQ	down	-0.389875	0.0088937	0.0114992	0.912409	-0.0526599	0.33733	-0.389875	0.0088937	0.349641	0.0199943
miR-18a	up	STAC2	down	-0.389601	0.00894596	-0.114169	0.273217	-0.214631	7.68583e-05	-0.389601	0.00894596	-0.118408	0.443964
miR-130b	up	USP13	down	-0.389581	0.00894967	0.299851	0.00332315	0.249256	4.00286e-06	-0.389581	0.00894967	0.122523	0.428172
miR-96	up	MITF	down	-0.388445	0.00916906	-0.358366	0.000390304	-0.375812	1.20691e-12	-0.388445	0.00916906	-0.159206	0.301953
miR-93	up	AGFG2	down	-0.388405	0.00917697	0.189895	0.0667749	0.222841	3.97228e-05	-0.388405	0.00917697	0.428664	0.003694
miR-376c	down	ELF4	up	-0.388142	0.00922828	-0.0798632	0.444173	0.0327318	0.5511	-0.388142	0.00922828	0.0819191	0.597058
miR-424	up	PHYHIP	down	-0.387423	0.00937042	-0.14768	0.155474	-0.194029	0.000361551	-0.387423	0.00937042	-0.112215	0.468318
miR-95	down	TLR6	up	-0.385865	0.00968446	-0.0668826	0.521853	0.0982597	0.0729136	-0.385865	0.00968446	0.10794	0.485536
miR-539	down	HIST1H3B	up	-0.385591	0.00974058	-0.159433	0.124806	-0.0666716	0.22427	-0.385591	0.00974058	-0.0561141	0.71751
miR-148a	down	CCNA2	up	-0.383117	0.0102606	0.0646296	0.536002	-0.0761882	0.164775	-0.383117	0.0102606	-0.244504	0.109699
miR-190a	down	IL7R	up	-0.382785	0.0103322	-0.0728212	0.485485	0.0594536	0.278614	-0.382785	0.0103322	0.00349475	0.982038
miR-3934	up	HCAR1	down	-0.382613	0.0103695	-0.0306194	0.769551	-0.0852668	0.119875	-0.382613	0.0103695	-0.240188	0.11631
miR-130b	up	TRIM63	down	-0.381771	0.0105535	-0.0979051	0.347842	-0.124345	0.0230388	-0.381771	0.0105535	-0.220234	0.150855
miR-190a	down	AJAP1	up	-0.381183	0.0106834	0.126623	0.223934	0.150252	0.00593601	-0.381183	0.0106834	0.086847	0.575101
miR-130b	up	MYBPC1	down	-0.380738	0.0107828	-0.0176295	0.866071	-0.0472631	0.389234	-0.380738	0.0107828	-0.0961861	0.534533
miR-3934	up	ZNF43	down	-0.380478	0.0108412	-0.176103	0.089539	-0.085627	0.118313	-0.380478	0.0108412	-0.00843042	0.956686
miR-377	down	IL7R	up	-0.378833	0.0112174	-0.0319254	0.760012	0.206768	0.000141315	-0.378833	0.0112174	0.180128	0.241985
miR-29c	down	SERPINH1	up	-0.377706	0.0114813	-0.28494	0.00537625	-0.309657	7.44004e-09	-0.377706	0.0114813	-0.399245	0.00725937
miR-378a	down	ONECUT1	up	-0.3768	0.0116976	0.154998	0.135783	0.124275	0.0231165	-0.3768	0.0116976	0.241666	0.114014
miR-190a	down	KYNU	up	-0.37665	0.0117336	-0.115968	0.265679	-0.141826	0.00944859	-0.37665	0.0117336	-0.0412824	0.790188
miR-454	up	ADARB2	down	-0.376416	0.01179	-0.129099	0.214936	-0.0133651	0.807733	-0.376416	0.01179	-0.178611	0.24604
miR-148a	down	CDCA4	up	-0.375225	0.0120813	0.00538263	0.958936	-0.197285	0.000285941	-0.375225	0.0120813	-0.154633	0.316229
miR-454	up	ENPP5	down	-0.374367	0.0122951	-0.0874894	0.401749	-0.0580287	0.290316	-0.374367	0.0122951	-0.128712	0.405029
miR-193b	up	MACC1	down	-0.374153	0.0123488	-0.222697	0.0309736	-0.18681	0.000600154	-0.374153	0.0123488	-0.0784994	0.612507
miR-615	up	ABLIM1	down	-0.373282	0.0125699	-0.18814	0.0693803	-0.228957	2.39039e-05	-0.373282	0.0125699	-0.0589459	0.703888
miR-195	down	CCNE1	up	-0.372509	0.0127687	-0.0270455	0.795824	-0.227252	2.7578e-05	-0.372509	0.0127687	-0.293085	0.0535108
miR-30e	down	KPNA2	up	-0.371765	0.0129628	-0.189413	0.0674833	-0.267246	7.1875e-07	-0.371765	0.0129628	-0.384731	0.00991869
miR-3934	up	MYOZ3	down	-0.371265	0.0130944	-0.324767	0.00140491	-0.306949	1.01916e-08	-0.371265	0.0130944	-0.386151	0.00962621
miR-410	down	HIST1H3B	up	-0.370177	0.0133851	0.154625	0.136736	-0.0849507	0.121259	-0.370177	0.0133851	0.0217423	0.888591
miR-21	up	PPFIA4	down	-0.369984	0.0134374	0.0376414	0.718704	0.0665929	0.224818	-0.369984	0.0134374	0.124225	0.421736
miR-127	down	CBX2	up	-0.369221	0.0136451	0.125119	0.229528	0.0159719	0.771189	-0.369221	0.0136451	-0.0362434	0.815321
miR-381	down	C11orf84	up	-0.368038	0.0139727	0.0125116	0.904732	0.00207822	0.969816	-0.368038	0.0139727	0.095224	0.538647
miR-208b	down	TPBG	up	-0.367954	0.0139962	0.0317293	0.761442	-0.073436	0.180614	-0.367954	0.0139962	-0.00747416	0.961596
miR-499a	down	TRIM59	up	-0.367071	0.0142455	-0.0438364	0.674832	-0.0484573	0.377351	-0.367071	0.0142455	-0.172118	0.26391
miR-196b	up	IGDCC4	down	-0.366941	0.0142826	-0.278681	0.00653079	-0.210599	0.000105326	-0.366941	0.0142826	-0.275469	0.0703197
miR-190a	down	CTLA4	up	-0.366191	0.0144978	-0.0771017	0.460133	-0.0524526	0.339239	-0.366191	0.0144978	0.0185692	0.904769
miR-21	up	TPM1	down	-0.36612	0.0145181	0.157277	0.130054	0.208492	0.000123885	-0.36612	0.0145181	0.280823	0.0648205
miR-31	up	SELE	down	-0.365988	0.0145562	-0.18562	0.0732652	-0.241576	8.01778e-06	-0.365988	0.0145562	-0.315722	0.0368244
miR-455	up	C3	down	-0.364972	0.0148531	-0.328051	0.00124729	-0.172778	0.00152612	-0.364972	0.0148531	-0.321833	0.03314
miR-301a	up	BMP3	down	-0.364299	0.0150526	-0.258165	0.0119961	-0.163282	0.00276245	-0.364299	0.0150526	-0.275906	0.069857
miR-497	down	TK1	up	-0.36403	0.0151329	-0.141089	0.174972	-0.0888197	0.105155	-0.36403	0.0151329	-0.16606	0.281344
miR-29c	down	CBX2	up	-0.363809	0.0151992	0.122413	0.239839	-0.0302839	0.581284	-0.363809	0.0151992	-0.00992473	0.949018
miR-3922	up	ANG	down	-0.363349	0.0153381	-0.0999248	0.337939	0.139381	0.0107662	-0.363349	0.0153381	-0.191273	0.213589
miR-877	up	HADH	down	-0.362955	0.0154575	-0.114385	0.272303	-0.132068	0.0157276	-0.362955	0.0154575	-0.0869476	0.574657
miR-3934	up	BTG2	down	-0.362931	0.015465	-0.109199	0.294781	-0.116006	0.0340651	-0.362931	0.015465	-0.0982787	0.525638
miR-375	down	LPCAT1	up	-0.360742	0.0161448	-0.130393	0.210334	-0.12589	0.0213765	-0.360742	0.0161448	-0.106868	0.48991
miR-204	down	TREM1	up	-0.359926	0.0164045	-0.105905	0.309672	-0.242719	7.24065e-06	-0.359926	0.0164045	-0.209102	0.173131
miR-139	down	NLGN4X	up	-0.359675	0.0164851	0.253776	0.0135841	0.0983749	0.0725765	-0.359675	0.0164851	0.260777	0.087317
miR-454	up	ENPP4	down	-0.358467	0.0168781	-0.105621	0.310977	-0.213595	8.33841e-05	-0.358467	0.0168781	-0.333652	0.0268746
miR-5683	down	CCNB1	up	-0.358089	0.0170025	-0.0578574	0.579642	-0.134752	0.0137129	-0.358089	0.0170025	-0.108813	0.481997
miR-615	up	PRICKLE4	down	-0.357426	0.0172227	-0.120542	0.247156	-0.151275	0.0056013	-0.357426	0.0172227	0.153319	0.320411
miR-30e	down	SERPINE2	up	-0.356899	0.0173995	-0.179431	0.0835503	-0.167134	0.00217944	-0.356899	0.0173995	-0.163697	0.288341
miR-130b	up	C3orf18	down	-0.356496	0.0175358	0.126189	0.225538	0.134354	0.0139963	-0.356496	0.0175358	0.140012	0.364684
miR-19a	up	SATB1	down	-0.355434	0.0178991	-0.415446	3.12951e-05	-0.37422	1.52617e-12	-0.355434	0.0178991	-0.318669	0.0350076
miR-93	up	ACSL1	down	-0.354565	0.0182011	-0.171197	0.0989814	-0.140928	0.00991527	-0.354565	0.0182011	0.170575	0.268282
miR-455	up	PCCA	down	-0.35422	0.0183222	-0.402031	5.90631e-05	-0.272598	4.20637e-07	-0.35422	0.0183222	-0.171225	0.266434
miR-30e	down	EXO1	up	-0.354065	0.0183769	0.0218592	0.834353	-0.0486286	0.375665	-0.354065	0.0183769	-0.0820491	0.596474
miR-99a	down	TYMS	up	-0.353955	0.0184157	0.0548407	0.599596	-0.0665224	0.22531	-0.353955	0.0184157	-0.233648	0.1269
miR-18a	up	CLU	down	-0.353883	0.0184412	-0.317657	0.00180967	-0.265678	8.39079e-07	-0.353883	0.0184412	-0.249122	0.102945
miR-455	up	SSBP2	down	-0.351947	0.0191369	-0.32076	0.00162155	-0.223741	3.68937e-05	-0.351947	0.0191369	-0.242402	0.112882
miR-93	up	CRY2	down	-0.351839	0.0191763	-0.107406	0.302829	-0.274462	3.48099e-07	-0.351839	0.0191763	-0.0123511	0.936577
miR-4746	up	FOLR1	down	-0.351411	0.0193332	-0.174013	0.0934703	-0.156405	0.00416559	-0.351411	0.0193332	-0.0082332	0.957699
miR-885	down	CDK6	up	-0.351183	0.0194174	-0.0793361	0.447195	-0.142418	0.00915183	-0.351183	0.0194174	0.142766	0.355233
miR-889	down	IL7R	up	-0.350994	0.0194877	0.0369867	0.723397	0.206741	0.000141601	-0.350994	0.0194877	0.189009	0.219162
miR-21	up	MEF2C	down	-0.350565	0.0196469	-0.109588	0.293054	0.115116	0.0354724	-0.350565	0.0196469	0.179187	0.244495
let-7c	down	EN2	up	-0.350118	0.0198147	-0.100064	0.337263	-0.0192225	0.726324	-0.350118	0.0198147	-0.134405	0.384391
miR-378a	down	HIST1H2BD	up	-0.350037	0.0198449	-0.079715	0.445022	-0.0996292	0.0689891	-0.350037	0.0198449	-0.0278626	0.857518
miR-19a	up	SLC37A1	down	-0.349483	0.0200543	-0.0928572	0.373378	-0.191805	0.000423485	-0.349483	0.0200543	-0.188647	0.220061
miR-19a	up	UBL3	down	-0.348948	0.0202584	-0.35185	0.000505982	-0.317656	2.88339e-09	-0.348948	0.0202584	-0.117635	0.446963
miR-30e	down	SLC16A1	up	-0.348501	0.0204304	-0.353288	0.000478038	-0.216406	6.67782e-05	-0.348501	0.0204304	-0.182789	0.234985
miR-455	up	SLC1A2	down	-0.348398	0.0204701	-0.435233	1.16581e-05	-0.240146	9.10197e-06	-0.348398	0.0204701	-0.260641	0.0874883
miR-497	down	BIRC5	up	-0.347791	0.0207057	-0.133143	0.200791	-0.126398	0.0208533	-0.347791	0.0207057	-0.157273	0.307938
miR-375	down	FSTL3	up	-0.34765	0.0207608	-0.0801617	0.442467	-0.20739	0.000134777	-0.34765	0.0207608	-0.145936	0.34454
miR-195	down	CDK1	up	-0.346908	0.0210526	-0.0645041	0.536795	-0.14728	0.00701211	-0.346908	0.0210526	-0.2013	0.190096
miR-136	down	TFRC	up	-0.346349	0.0212745	-0.243716	0.0179279	-0.046789	0.394014	-0.346349	0.0212745	-0.225379	0.141302
miR-877	up	PFKM	down	-0.345778	0.0215038	0.108911	0.296062	-0.064592	0.23909	-0.345778	0.0215038	0.197756	0.19818
miR-130b	up	KCNB1	down	-0.344998	0.0218196	-0.061854	0.55369	-0.0509852	0.352941	-0.344998	0.0218196	-0.0821335	0.596095
miR-375	down	CTSC	up	-0.344264	0.0221203	-0.17733	0.0872923	-0.103051	0.0599345	-0.344264	0.0221203	0.010688	0.945103
miR-135b	up	SNED1	down	-0.343753	0.022332	-0.422986	2.16376e-05	-0.346252	7.68526e-11	-0.343753	0.022332	-0.329938	0.028727
miR-503	up	GREM2	down	-0.343364	0.0224942	-0.0533386	0.609644	-0.1499	0.0060553	-0.343364	0.0224942	0.119437	0.439984
miR-93	up	TRAK1	down	-0.342883	0.0226962	-0.161557	0.119795	-0.163162	0.00278267	-0.342883	0.0226962	0.0371936	0.810567
miR-885	down	MCM5	up	-0.34188	0.023122	-0.0450392	0.666434	0.108212	0.04815	-0.34188	0.023122	0.17448	0.257313
miR-497	down	CEP55	up	-0.341683	0.0232064	-0.160107	0.123198	0.021199	0.699484	-0.341683	0.0232064	-0.217872	0.155396
miR-4652	up	TNNC1	down	-0.341006	0.0234983	-0.17333	0.0947845	-0.168867	0.00195582	-0.341006	0.0234983	-0.101257	0.513105
miR-140	down	MICB	up	-0.340346	0.0237863	0.0394834	0.705556	0.144991	0.0079564	-0.340346	0.0237863	0.0040057	0.979412
miR-193b	up	PAK3	down	-0.340258	0.023825	-0.374549	0.000199901	-0.444302	1.36356e-17	-0.340258	0.023825	-0.50449	0.000479535
miR-5683	down	POLQ	up	-0.339303	0.0242469	0.0405385	0.698063	-0.0273729	0.618148	-0.339303	0.0242469	0.0433665	0.779852
miR-30e	down	LPCAT1	up	-0.338808	0.0244683	-0.203712	0.0489138	-0.20812	0.000127462	-0.338808	0.0244683	0.149501	0.332751
miR-93	up	GTF2IRD2B	down	-0.338328	0.0246844	0.264155	0.0100914	0.17051	0.00176342	-0.338328	0.0246844	0.191847	0.212192
miR-204	down	POU2F2	up	-0.337816	0.0249167	0.0904873	0.38575	-0.0319801	0.560286	-0.337816	0.0249167	0.380596	0.0108147
miR-195	down	WNT7A	up	-0.337206	0.0251958	-0.0781075	0.454284	0.0348131	0.526055	-0.337206	0.0251958	-0.0587159	0.704991
miR-450b	up	SLC7A14	down	-0.337027	0.0252781	-0.104546	0.315959	-0.142044	0.0093385	-0.337027	0.0252781	-0.286496	0.0593727
miR-503	up	TNFRSF11A	down	-0.335867	0.0258174	-0.510495	1.46868e-07	-0.217656	6.04381e-05	-0.335867	0.0258174	-0.450456	0.00215269
miR-378i	down	KCNJ6	up	-0.33493	0.0262606	-0.0863222	0.408083	0.0573466	0.296033	-0.33493	0.0262606	-0.019776	0.898612
miR-377	down	AGTRAP	up	-0.334306	0.0265589	0.116459	0.263649	0.0331572	0.545934	-0.334306	0.0265589	0.109903	0.47759
miR-378a	down	CHTF18	up	-0.334227	0.0265968	-0.0194331	0.852518	-0.147027	0.00711116	-0.334227	0.0265968	0.0310637	0.841348
miR-454	up	SNTB1	down	-0.334216	0.0266022	-0.229274	0.0262261	-0.299383	2.4134e-08	-0.334216	0.0266022	-0.31489	0.0373515
miR-29c	down	COL5A2	up	-0.333664	0.0268687	-0.225313	0.0290045	-0.150255	0.00593508	-0.333664	0.0268687	-0.220021	0.151261
miR-369	down	HIST1H3B	up	-0.333524	0.0269365	0.048966	0.639304	-0.0847073	0.122332	-0.333524	0.0269365	0.0588654	0.704274
miR-224	up	SEC14L5	down	-0.333196	0.0270966	-0.0901363	0.387604	-0.0883214	0.107129	-0.333196	0.0270966	0.176897	0.250676
miR-455	up	IGF1	down	-0.333099	0.0271438	-0.315257	0.00196841	-0.321753	1.75486e-09	-0.333099	0.0271438	-0.570708	5.23121e-05
miR-204	down	IL1B	up	-0.332868	0.0272572	-0.312114	0.00219527	-0.271484	4.70698e-07	-0.332868	0.0272572	-0.45256	0.00203949
miR-497	down	KPNA2	up	-0.332837	0.0272725	-0.247717	0.0160746	-0.108724	0.0470959	-0.332837	0.0272725	-0.257836	0.0910738
miR-301b	up	SECISBP2L	down	-0.332333	0.0275208	-0.164563	0.112973	-0.225267	3.25284e-05	-0.332333	0.0275208	-0.353103	0.0187187
miR-497	down	CDCA4	up	-0.331554	0.0279086	-0.0494586	0.635933	-0.173555	0.00145188	-0.331554	0.0279086	-0.0389168	0.801963
miR-93	up	SYBU	down	-0.331254	0.0280589	-0.0852183	0.414126	-0.0017089	0.975178	-0.331254	0.0280589	-0.118043	0.445378
miR-19a	up	CLVS2	down	-0.33061	0.0283842	0.0464238	0.656816	-0.122876	0.0247205	-0.33061	0.0283842	0.142219	0.357098
miR-455	up	PLA2G16	down	-0.329485	0.0289603	-0.400681	6.28677e-05	-0.461495	5.08255e-19	-0.329485	0.0289603	-0.528046	0.000229689
miR-497	down	CCNE1	up	-0.329275	0.029069	-0.0154816	0.882263	-0.100788	0.0658056	-0.329275	0.029069	-0.0916658	0.553994
miR-301b	up	LEFTY1	down	-0.329142	0.0291376	0.00770694	0.941231	0.172086	0.00159522	-0.329142	0.0291376	0.232498	0.128833
miR-224	up	EYA4	down	-0.328943	0.0292412	-0.069767	0.504018	-0.0781005	0.154399	-0.328943	0.0292412	0.145773	0.345085
miR-299	down	HIST1H2BE	up	-0.328939	0.0292434	-0.0693678	0.506468	-0.00315712	0.954161	-0.328939	0.0292434	-0.063017	0.684465
miR-204	down	HAS2	up	-0.328787	0.0293224	-0.100421	0.335533	-0.0668741	0.222862	-0.328787	0.0293224	-0.0730428	0.637503
miR-93	up	PPP1R12B	down	-0.328431	0.0295088	0.0270116	0.796075	-0.224479	3.47181e-05	-0.328431	0.0295088	-0.0330032	0.831581
miR-377	down	CLEC7A	up	-0.328314	0.0295697	-0.111531	0.284527	-0.0577237	0.292863	-0.328314	0.0295697	0.179296	0.244203
miR-615	up	RAB11FIP1	down	-0.327512	0.0299936	-0.198598	0.0550004	-0.233551	1.6173e-05	-0.327512	0.0299936	-0.284271	0.0614636
miR-30e	down	QRFPR	up	-0.32647	0.0305519	0.153294	0.140188	0.0802339	0.143415	-0.32647	0.0305519	0.177535	0.248945
miR-411	down	HOXA10	up	-0.325175	0.031257	0.109495	0.293463	-0.0724811	0.186364	-0.325175	0.031257	0.0279648	0.857002
miR-455	up	PLEKHA6	down	-0.324121	0.0318412	-0.0810297	0.437526	-0.20657	0.000143457	-0.324121	0.0318412	-0.24734	0.105512
miR-93	up	MAN1C1	down	-0.323424	0.0322325	-0.16629	0.109191	-0.251854	3.14848e-06	-0.323424	0.0322325	-0.00531964	0.972661
miR-93	up	KIF6	down	-0.32318	0.0323701	-0.0230768	0.825269	-0.131543	0.0161509	-0.32318	0.0323701	-0.0654661	0.672875
miR-29c	down	FSCN1	up	-0.322974	0.032487	-0.407514	4.57086e-05	-0.282027	1.59103e-07	-0.322974	0.032487	-0.501691	0.000521539
let-7c	down	ITGA3	up	-0.322505	0.0327538	-0.420635	2.42995e-05	-0.222473	4.09372e-05	-0.322505	0.0327538	-0.158502	0.304123
miR-592	up	EMCN	down	-0.322296	0.0328737	-0.0377203	0.718139	-0.0614056	0.263107	-0.322296	0.0328737	-0.24572	0.107889
miR-19a	up	PGPEP1	down	-0.322273	0.0328866	-0.228756	0.0265759	-0.301973	1.80167e-08	-0.322273	0.0328866	-0.25339	0.0969908
miR-139	down	LIMD2	up	-0.321028	0.0336072	0.040473	0.698527	-0.0622392	0.25667	-0.321028	0.0336072	0.0752692	0.627254
miR-195	down	BIRC5	up	-0.320201	0.0340927	-0.0632472	0.544776	-0.177444	0.00112744	-0.320201	0.0340927	-0.154556	0.316475
miR-143	down	FSCN1	up	-0.320029	0.0341949	-0.0295505	0.777383	0.13652	0.0125128	-0.320029	0.0341949	-0.00789882	0.959415
miR-195	down	CDCA4	up	-0.320006	0.0342084	-0.0784219	0.452464	-0.133035	0.0149737	-0.320006	0.0342084	0.164739	0.28524
miR-29c	down	ULBP2	up	-0.319935	0.0342501	-0.299852	0.00332308	-0.234205	1.52873e-05	-0.319935	0.0342501	-0.296566	0.0506078
miR-455	up	DNAH9	down	-0.319795	0.0343335	0.148727	0.152535	-0.151615	0.00549411	-0.319795	0.0343335	-0.0947515	0.540673
miR-301b	up	MYH11	down	-0.319477	0.0345226	-0.237991	0.0208977	-0.0157796	0.773868	-0.319477	0.0345226	0.303108	0.0454965
let-7c	down	LIMD2	up	-0.319078	0.0347619	0.18462	0.0748543	0.230033	2.18282e-05	-0.319078	0.0347619	0.208967	0.173417
miR-204	down	EXT1	up	-0.318808	0.0349243	-0.257391	0.0122638	-0.150912	0.00571808	-0.318808	0.0349243	-0.215145	0.160762
miR-885	down	C2orf91	up	-0.317949	0.0354451	0.0453043	0.664589	0.167051	0.00219081	-0.317949	0.0354451	0.28504	0.0607343
miR-301a	up	MYH11	down	-0.317625	0.035643	-0.296867	0.00366636	-0.304332	1.37706e-08	-0.317625	0.035643	-0.0923416	0.551063
miR-26a-2	down	BIRC5	up	-0.317205	0.0359012	-0.0207559	0.842603	-0.32688	9.32801e-10	-0.317205	0.0359012	-0.209137	0.173058
miR-26a-1	down	BIRC5	up	-0.316867	0.0361097	-0.0310843	0.766151	-0.325585	1.09548e-09	-0.316867	0.0361097	-0.211176	0.168811
miR-93	up	KLB	down	-0.316417	0.0363891	0.246857	0.0164582	0.226152	3.02266e-05	-0.316417	0.0363891	0.237365	0.120797
miR-499a	down	HIST1H3B	up	-0.315931	0.0366936	0.0193288	0.8533	-0.083933	0.125798	-0.315931	0.0366936	-0.0676657	0.66253
miR-21	up	APOLD1	down	-0.315503	0.0369629	-0.199109	0.0543653	-0.0779439	0.155229	-0.315503	0.0369629	0.0391068	0.801015
miR-877	up	KIF1C	down	-0.315095	0.0372212	-0.0911973	0.382018	0.0622116	0.256881	-0.315095	0.0372212	-0.126091	0.414742
miR-21	up	PDGFD	down	-0.315076	0.0372331	-0.279987	0.00627317	0.00404324	0.941316	-0.315076	0.0372331	0.360142	0.0163356
miR-139	down	PAX5	up	-0.314787	0.0374168	0.115063	0.269452	0.0802991	0.143089	-0.314787	0.0374168	0.321602	0.0332737
miR-497	down	CDK1	up	-0.313776	0.0380665	-0.185482	0.0734822	-0.0382713	0.485761	-0.313776	0.0380665	-0.286937	0.0589646
miR-454	up	KCNB1	down	-0.313644	0.038152	-0.118539	0.255156	-0.209652	0.000113317	-0.313644	0.038152	-0.274182	0.0716945
miR-30e	down	CELSR3	up	-0.312754	0.0387318	0.116898	0.261838	0.106558	0.0516947	-0.312754	0.0387318	0.114381	0.459722
miR-93	up	CADM2	down	-0.312658	0.038795	-0.113599	0.275633	-0.159965	0.00337439	-0.312658	0.038795	0.0961358	0.534747
miR-455	up	PLCXD3	down	-0.31219	0.0391036	-0.380432	0.000155368	-0.305077	1.26433e-08	-0.31219	0.0391036	-0.396933	0.00763634
miR-195	down	CEP55	up	-0.311452	0.0395938	-0.02819	0.787384	0.0444345	0.418271	-0.311452	0.0395938	0.0503079	0.745708
miR-454	up	BMP3	down	-0.310814	0.0400221	-0.0820877	0.431545	-0.171976	0.0016065	-0.310814	0.0400221	-0.190615	0.215199
miR-381	down	ITGA3	up	-0.310368	0.0403235	0.158276	0.1276	0.158679	0.00364283	-0.310368	0.0403235	0.178624	0.246006
miR-450b	up	WFDC6	down	-0.310176	0.0404534	-0.264404	0.0100184	-0.0578817	0.291542	-0.310176	0.0404534	-0.173837	0.259099
miR-29c	down	OIP5	up	-0.309988	0.0405814	0.114456	0.272004	-0.0949007	0.0833124	-0.309988	0.0405814	-0.322061	0.0330088
miR-206	down	ACTL6A	up	-0.309193	0.0411265	-0.105706	0.310587	-0.067903	0.215809	-0.309193	0.0411265	0.175205	0.255309
miR-130b	up	CRY2	down	-0.308858	0.0413579	-0.119816	0.250036	-0.233846	1.57674e-05	-0.308858	0.0413579	-0.288419	0.0576112
miR-4746	up	ATP1B4	down	-0.308777	0.0414134	-0.329459	0.00118479	-0.309463	7.61061e-09	-0.308777	0.0414134	-0.341123	0.0234479
miR-136	down	PLOD2	up	-0.308701	0.0414664	0.0146925	0.888225	0.106386	0.0520753	-0.308701	0.0414664	0.0119631	0.938566
miR-3662	up	SYNM	down	-0.308654	0.0414991	-0.245828	0.0169275	-0.14305	0.00884451	-0.308654	0.0414991	-0.155275	0.3142
miR-148a	down	PRNP	up	-0.308094	0.0418895	-0.29831	0.00349667	-0.151031	0.00567957	-0.308094	0.0418895	-0.369006	0.0137043
miR-301a	up	ENPP4	down	-0.308063	0.0419109	-0.260088	0.0113533	-0.255549	2.22753e-06	-0.308063	0.0419109	-0.307576	0.0422524
miR-431	down	RTTN	up	-0.307432	0.0423545	-0.0459016	0.660437	0.0389445	0.478115	-0.307432	0.0423545	0.168512	0.274197
miR-130b	up	TNS1	down	-0.306485	0.043027	-0.0632986	0.544449	0.00456468	0.933764	-0.306485	0.043027	0.0572063	0.712246
miR-497	down	BUB1	up	-0.30626	0.0431882	-0.196083	0.0582128	-0.0627267	0.252956	-0.30626	0.0431882	-0.335911	0.0257973
miR-450b	up	HMGN5	down	-0.306154	0.0432636	-0.0896705	0.390071	0.0629286	0.251428	-0.306154	0.0432636	0.223536	0.144671
miR-210	up	HIF3A	down	-0.306123	0.0432864	-0.150687	0.147139	-0.0738148	0.178369	-0.306123	0.0432864	0.0372815	0.810127
miR-30a	down	QRFPR	up	-0.30581	0.0435113	0.0383435	0.713683	-0.0900882	0.10026	-0.30581	0.0435113	-0.131001	0.396657
miR-18a	up	IGFBP5	down	-0.305793	0.0435241	-0.303191	0.00297341	-0.436446	5.76902e-17	-0.305793	0.0435241	-0.314887	0.0373533
miR-4652	up	PKIA	down	-0.305631	0.0436407	-0.267685	0.00909774	-0.12294	0.0246453	-0.305631	0.0436407	-0.298912	0.0487239
miR-301a	up	IGFBP5	down	-0.305557	0.043694	-0.216302	0.0362668	-0.311648	5.89227e-09	-0.305557	0.043694	-0.260732	0.0873732
miR-450b	up	UNC5D	down	-0.305442	0.0437773	-0.0720949	0.489859	-0.029821	0.587077	-0.305442	0.0437773	-0.00222076	0.988585
miR-130b	up	C16orf45	down	-0.305151	0.043989	-0.125186	0.229278	0.0524768	0.339016	-0.305151	0.043989	0.167645	0.276711
miR-3934	up	FAM166B	down	-0.304767	0.0442692	-0.0861349	0.409104	-0.160127	0.00334182	-0.304767	0.0442692	-0.122355	0.428811
miR-454	up	WDR31	down	-0.304375	0.0445569	-0.0752429	0.471052	-0.0198048	0.718381	-0.304375	0.0445569	-0.0307715	0.842821
miR-30a	down	MYO10	up	-0.304309	0.0446052	-0.193354	0.0618711	-0.0502444	0.359989	-0.304309	0.0446052	0.0735584	0.635123
miR-877	up	ANK1	down	-0.303835	0.0449556	0.0959675	0.357512	-0.0618001	0.260047	-0.303835	0.0449556	0.0239174	0.877527
miR-190a	down	CHEK1	up	-0.303733	0.0450306	0.0472175	0.651329	0.0250126	0.648765	-0.303733	0.0450306	0.0519741	0.737581
miR-93	up	GTF2IRD2	down	-0.303443	0.0452464	0.247636	0.0161105	0.230061	2.17775e-05	-0.303443	0.0452464	0.20465	0.182673
miR-381	down	GREM1	up	-0.30306	0.0455326	0.298233	0.00350549	0.346531	7.40522e-11	-0.30306	0.0455326	0.19908	0.195132
miR-1245a	up	RAB11FIP1	down	-0.302834	0.0457015	-0.249276	0.0153986	-0.263385	1.05038e-06	-0.302834	0.0457015	-0.166799	0.279177
miR-454	up	LDHD	down	-0.302794	0.0457315	-0.263741	0.0102141	-0.120038	0.0282718	-0.302794	0.0457315	-0.288612	0.0574362
miR-204	down	SERPINE1	up	-0.30232	0.0460887	-0.208919	0.0433005	-0.162615	0.0028767	-0.30232	0.0460887	-0.255231	0.0945063
miR-454	up	LEFTY1	down	-0.302112	0.0462462	0.118944	0.253522	-0.0336584	0.539878	-0.302112	0.0462462	-0.0765165	0.621542
miR-497	down	KIF23	up	-0.302042	0.0462992	-0.170742	0.0998952	-0.0206812	0.706481	-0.302042	0.0462992	-0.112901	0.465588
miR-148a	down	CEP55	up	-0.30174	0.0465291	0.0552496	0.596873	-0.159522	0.00346471	-0.30174	0.0465291	-0.299317	0.0484047
miR-338	down	MMP9	up	-0.301426	0.0467691	0.0374508	0.720069	-0.104049	0.0574875	-0.301426	0.0467691	0.0760902	0.623492
miR-937	up	SCRG1	down	-0.301322	0.0468487	-0.460228	3.05581e-06	-0.148428	0.00657732	-0.301322	0.0468487	-0.176421	0.251973
miR-130b	up	IGFBP5	down	-0.297621	0.0497532	-0.106784	0.30565	0.154884	0.00455213	-0.297621	0.0497532	0.235072	0.124534

## Sheet: KICH
miRNA	miRNA regulated status	Target gene	Gene regulate status	r_hc	p_hc	r_early	p_early	r_advanced	p_advanced	r_normal	p_normal	r_tumor	p_tumor
miR-369	down	TRIM2	up	-0.803545	2.26267e-06	-0.254652	0.0913834	-0.61922	0.00359871	-0.803545	2.26267e-06	-0.436332	0.0292137
miR-127	down	TMEM116	up	-0.788907	4.63489e-06	-0.211077	0.16397	-0.655863	0.00169004	-0.788907	4.63489e-06	-0.422911	0.03518
miR-141	up	DOK6	down	-0.782064	6.36006e-06	0.0787268	0.607215	-0.0664599	0.780715	-0.782064	6.36006e-06	0.0968473	0.645135
miR-766	up	GABRB2	down	-0.765973	1.28334e-05	0.0104711	0.945573	-0.280695	0.23062	-0.765973	1.28334e-05	0.0427595	0.839179
miR-411	down	TRIM2	up	-0.761523	1.54346e-05	-0.213288	0.159497	-0.668945	0.00125934	-0.761523	1.54346e-05	-0.426411	0.0335379
miR-182	up	PITPNM3	down	-0.750997	2.35213e-05	0.239706	0.112746	-0.0790303	0.740497	-0.750997	2.35213e-05	0.104338	0.619655
miR-192	down	TRIB3	up	-0.748013	2.64075e-05	0.0413758	0.787266	0.049332	0.83637	-0.748013	2.64075e-05	0.126483	0.546864
miR-369	down	LSAMP	up	-0.747927	2.64949e-05	0.0146009	0.92416	-0.402382	0.0786005	-0.747927	2.64949e-05	0.288079	0.162574
miR-508	down	FUT1	up	-0.747399	2.70388e-05	0.183319	0.228055	0.445729	0.0488745	-0.747399	2.70388e-05	0.255494	0.217705
miR-218-1	up	SLCO3A1	down	-0.73817	3.8265e-05	-0.0551344	0.719057	0.201786	0.393583	-0.73817	3.8265e-05	0.0680495	0.746542
miR-192	down	FHDC1	up	-0.731833	4.81769e-05	-0.139509	0.360719	0.424627	0.0620202	-0.731833	4.81769e-05	0.173393	0.40717
miR-187	up	GALNT3	down	-0.721626	6.89182e-05	-0.01366	0.929035	0.684208	0.000877315	-0.721626	6.89182e-05	0.000486632	0.998158
miR-675	down	KCNQ5	up	-0.718305	7.71758e-05	-0.222004	0.14273	-0.0648649	0.785859	-0.718305	7.71758e-05	-0.076854	0.715009
miR-766	up	EMID1	down	-0.706902	0.00011252	0.0761317	0.619148	0.388942	0.0900963	-0.706902	0.00011252	0.252	0.224281
miR-96	up	PITPNM3	down	-0.69895	0.000144882	0.239528	0.113022	-0.114369	0.631143	-0.69895	0.000144882	0.145465	0.487812
miR-493	down	TRIM2	up	-0.698184	0.00014839	-0.394654	0.00730128	-0.680263	0.000965136	-0.698184	0.00014839	-0.44608	0.0254126
miR-654	down	ADRB1	up	-0.695876	0.000159418	-0.405594	0.00570719	-0.488565	0.0288312	-0.695876	0.000159418	-0.417666	0.0377595
miR-136	down	SNX13	up	-0.694971	0.000163931	-0.306617	0.0405008	-0.596921	0.00545898	-0.694971	0.000163931	-0.450381	0.0238675
miR-497	down	TMEM161B	up	-0.694971	0.000163935	0.170675	0.262307	-0.528615	0.0165652	-0.694971	0.000163935	-0.146882	0.483536
miR-885	up	XPNPEP2	down	-0.679663	0.000259114	-0.0528127	0.730433	-0.616063	0.00382446	-0.679663	0.000259114	-0.260917	0.207759
miR-766	up	SSTR3	down	-0.6785	0.000267997	-0.0551087	0.719183	-0.0617853	0.795815	-0.6785	0.000267997	0.0992554	0.6369
miR-200c	up	OSR1	down	-0.671587	0.000326456	-0.137789	0.366728	-0.511226	0.0212361	-0.671587	0.000326456	-0.197272	0.344558
miR-675	down	STRIP2	up	-0.670681	0.000334883	0.00907512	0.95282	0.102173	0.668189	-0.670681	0.000334883	-0.27396	0.185107
miR-141	up	ANGPTL7	down	-0.670006	0.000341288	0.0178518	0.907341	-0.382112	0.0963904	-0.670006	0.000341288	-0.203116	0.330163
miR-181c	down	EPS8	up	-0.669183	0.000349234	-0.624634	4.51933e-06	-0.0925837	0.697851	-0.669183	0.000349234	-0.449342	0.0242336
miR-183	up	XYLB	down	-0.669053	0.0003505	-0.164789	0.279364	-0.507314	0.0224188	-0.669053	0.0003505	-0.142521	0.496754
miR-215	down	TRIB3	up	-0.666054	0.000380927	-0.0323674	0.832831	0.14123	0.552564	-0.666054	0.000380927	0.0166052	0.937207
miR-190a	down	NLGN4X	up	-0.665791	0.000383702	0.0635763	0.678214	0.111303	0.64038	-0.665791	0.000383702	0.27656	0.180804
miR-183	up	A1CF	down	-0.665514	0.000386648	-0.244852	0.105001	0.0468355	0.844552	-0.665514	0.000386648	-0.142371	0.497213
miR-411	down	BACE2	up	-0.664478	0.000397816	-0.0433707	0.777265	-0.750475	0.000137971	-0.664478	0.000397816	-0.251958	0.224361
miR-141	up	COL19A1	down	-0.660797	0.000439815	0.00358495	0.981354	0.00656312	0.978092	-0.660797	0.000439815	0.141558	0.499698
miR-885	up	GREB1	down	-0.659844	0.000451297	-0.245741	0.103705	-0.383566	0.0950236	-0.659844	0.000451297	-0.494493	0.0119789
miR-221	up	DDAH1	down	-0.655849	0.000502295	-0.715094	3.41032e-08	0.531213	0.0159443	-0.655849	0.000502295	-0.553644	0.00409003
miR-218-2	up	PPIL1	down	-0.655712	0.000504121	-0.395215	0.00721107	-0.165746	0.484949	-0.655712	0.000504121	-0.275276	0.18292
miR-183	up	ACY1	down	-0.651883	0.00055777	0.167862	0.270371	0.305078	0.190893	-0.651883	0.00055777	0.405573	0.0442799
miR-134	down	FASTK	up	-0.647518	0.00062488	-0.267013	0.0762087	0.160493	0.499082	-0.647518	0.00062488	-0.342455	0.0937936
miR-892c	up	FGF2	down	-0.64703	0.000632796	-0.322376	0.030793	-0.241901	0.304176	-0.64703	0.000632796	-0.253258	0.221897
miR-382	down	CPEB4	up	-0.647029	0.00063282	-0.146559	0.336711	-0.579959	0.00735163	-0.647029	0.00063282	-0.490266	0.012846
miR-598	up	SLC7A5	down	-0.645348	0.000660758	0.0846574	0.580323	-0.226282	0.337394	-0.645348	0.000660758	-0.118903	0.571329
miR-190a	down	FOXP1	up	-0.644797	0.000670157	-0.36452	0.0138233	-0.129589	0.586077	-0.644797	0.000670157	-0.325025	0.112894
miR-3117	down	VSIG2	up	-0.64135	0.000731552	-0.321747	0.0311399	0.20716	0.380836	-0.64135	0.000731552	-0.431795	0.0311321
miR-891b	up	RHOJ	down	-0.639577	0.00076497	0.262918	0.0809992	-0.202526	0.391815	-0.639577	0.00076497	0.31626	0.123515
miR-766	up	NEGR1	down	-0.638518	0.000785555	-0.0386729	0.800871	-0.0755349	0.75162	-0.638518	0.000785555	-0.0511513	0.808144
miR-127	down	ADIPOR2	up	-0.637605	0.000803673	-0.250209	0.097377	-0.523032	0.0179648	-0.637605	0.000803673	-0.171542	0.412272
miR-214	down	PDP2	up	-0.636392	0.000828327	-0.35018	0.0183647	-0.676848	0.00104706	-0.636392	0.000828327	-0.37859	0.0620149
miR-892c	up	CNGA4	down	-0.634092	0.000876833	-0.396805	0.00696047	-0.167987	0.47898	-0.634092	0.000876833	-0.174557	0.403978
miR-766	up	MYLK3	down	-0.627703	0.00102463	0.103095	0.50036	0.125851	0.597019	-0.627703	0.00102463	0.445012	0.0258087
miR-508	down	OIP5	up	-0.623246	0.00113998	0.241455	0.110067	0.231338	0.326416	-0.623246	0.00113998	0.148463	0.47879
miR-182	up	PCOLCE2	down	-0.622256	0.00116705	0.00431986	0.977532	-0.395565	0.0842864	-0.622256	0.00116705	0.0570345	0.78655
miR-190a	down	ARHGAP21	up	-0.621863	0.00117794	-0.377823	0.010503	-0.151829	0.522823	-0.621863	0.00117794	-0.313685	0.126769
miR-381	down	COX6A1	up	-0.61996	0.001232	-0.189323	0.21292	-0.486475	0.029627	-0.61996	0.001232	-0.454174	0.0225689
miR-221	up	LGSN	down	-0.619228	0.00125335	-0.256377	0.0891351	-0.102993	0.665673	-0.619228	0.00125335	-0.189358	0.36464
miR-485	down	CYCS	up	-0.616286	0.00134234	0.101381	0.507549	-0.541615	0.0136431	-0.616286	0.00134234	-0.300526	0.144374
miR-615	down	HIST1H2BJ	up	-0.614092	0.00141219	-0.174585	0.251369	-0.472229	0.0355207	-0.614092	0.00141219	-0.336126	0.100426
miR-766	up	XKR4	down	-0.613332	0.00143712	0.150742	0.322951	0.0766799	0.747971	-0.613332	0.00143712	0.125938	0.548607
miR-204	down	KNTC1	up	-0.612918	0.00145084	-0.612807	7.65585e-06	-0.166071	0.484082	-0.612918	0.00145084	-0.75187	1.46814e-05
miR-183	up	CR1	down	-0.610857	0.00152085	0.151903	0.319192	-0.605797	0.00464131	-0.610857	0.00152085	0.284639	0.167878
miR-582	up	LRRK2	down	-0.610819	0.00152217	-0.510182	0.000343294	-0.137755	0.562478	-0.610819	0.00152217	-0.382633	0.0590554
miR-3653	up	FBLIM1	down	-0.610707	0.00152606	-0.0955343	0.532457	-0.565265	0.00939715	-0.610707	0.00152606	-0.319179	0.119901
miR-651	up	CHRDL1	down	-0.607344	0.00164689	-0.101975	0.505054	-0.291221	0.212861	-0.607344	0.00164689	-0.45709	0.02161
miR-766	up	LAX1	down	-0.607078	0.0016568	-0.0423576	0.78234	0.0192539	0.935785	-0.607078	0.0016568	0.157292	0.452721
miR-576	up	MYLK3	down	-0.606013	0.00169689	0.00704751	0.963353	-0.136093	0.567247	-0.606013	0.00169689	-0.132362	0.528229
miR-335	down	SLC22A15	up	-0.605537	0.00171511	0.223141	0.140643	0.166556	0.482788	-0.605537	0.00171511	0.290451	0.158988
miR-890	up	SMAD9	down	-0.603316	0.00180227	-0.187694	0.216954	-0.423327	0.0629092	-0.603316	0.00180227	-0.342624	0.0936201
miR-651	up	FZD1	down	-0.602718	0.00182636	-0.0708132	0.643907	-0.564833	0.00946352	-0.602718	0.00182636	-0.338027	0.0983984
miR-215	down	ATAD2	up	-0.602425	0.00183824	0.0918925	0.548266	0.110625	0.64243	-0.602425	0.00183824	-0.00747054	0.971728
miR-892c	up	ZC3HAV1L	down	-0.599667	0.00195363	-0.342848	0.0211363	-0.565842	0.00930882	-0.599667	0.00195363	-0.513886	0.0085963
miR-411	down	HIST1H3H	up	-0.598122	0.00202092	-0.156888	0.30338	0.38711	0.0917541	-0.598122	0.00202092	-0.20836	0.317559
miR-141	up	SPIB	down	-0.59609	0.00211244	0.0475201	0.756577	-0.0195893	0.934668	-0.59609	0.00211244	0.402014	0.0463583
miR-766	up	C2orf71	down	-0.595885	0.00212187	0.18688	0.218991	-0.164299	0.488823	-0.595885	0.00212187	0.3502	0.086128
miR-182	up	PODXL	down	-0.594781	0.00217321	0.147516	0.33353	0.169293	0.47552	-0.594781	0.00217321	-0.246334	0.235222
miR-192	down	ATAD2	up	-0.594405	0.00219097	-0.0274852	0.857764	0.159032	0.503049	-0.594405	0.00219097	0.0887489	0.673127
miR-485	down	MUC20	up	-0.593402	0.00223886	-0.228389	0.131301	-0.601103	0.00506012	-0.593402	0.00223886	-0.329044	0.108256
miR-377	down	SIGLEC15	up	-0.589425	0.00243769	-0.237883	0.115593	-0.369623	0.108721	-0.589425	0.00243769	0.0429983	0.838292
miR-335	down	PPARGC1A	up	-0.586497	0.00259351	0.186117	0.220912	0.129726	0.585679	-0.586497	0.00259351	0.0287732	0.891404
miR-514b	down	WRN	up	-0.585271	0.00266126	-0.0241117	0.875074	0.168635	0.477261	-0.585271	0.00266126	0.135538	0.51829
miR-766	up	KCNA5	down	-0.584445	0.00270771	-0.228648	0.130852	0.208169	0.378468	-0.584445	0.00270771	-0.315097	0.124977
miR-221	up	C11orf54	down	-0.582596	0.00281418	-0.286511	0.0563774	0.638107	0.00246661	-0.582596	0.00281418	0.252645	0.223057
miR-183	up	GABRB1	down	-0.581894	0.00285552	-0.275344	0.0671526	0.0815857	0.732396	-0.581894	0.00285552	-0.0706558	0.737163
miR-497	down	HIST1H3H	up	-0.579547	0.00299756	-0.0299855	0.844976	-0.0565215	0.812901	-0.579547	0.00299756	0.0638497	0.761727
miR-22	up	BMP6	down	-0.578227	0.00308005	-0.024824	0.871413	0.333998	0.150088	-0.578227	0.00308005	0.0382229	0.856057
miR-377	down	DCPS	up	-0.577317	0.00313801	-0.131164	0.390431	-0.230544	0.328125	-0.577317	0.00313801	0.0694385	0.741539
miR-3653	up	PDLIM3	down	-0.57683	0.00316943	0.124854	0.413825	-0.405971	0.0757244	-0.57683	0.00316943	-0.0409518	0.845896
miR-335	down	CHAC1	up	-0.574889	0.0032972	0.143109	0.348331	0.04717	0.843454	-0.574889	0.0032972	0.408103	0.042847
miR-204	down	43160	up	-0.574631	0.0033145	-0.289307	0.05391	0.138361	0.560745	-0.574631	0.0033145	-0.00783603	0.970346
miR-508	down	TMEM65	up	-0.574519	0.00332209	0.137849	0.366515	0.019637	0.93451	-0.574519	0.00332209	-0.018066	0.931695
miR-214	down	CPEB4	up	-0.574298	0.00333698	0.0396988	0.795701	-0.717081	0.000373337	-0.574298	0.00333698	-0.468534	0.0181606
miR-299	down	ATP6V1A	up	-0.57315	0.00341539	-0.232682	0.124012	-0.696539	0.000644997	-0.57315	0.00341539	-0.457183	0.02158
miR-335	down	TMEM33	up	-0.572384	0.00346855	-0.422085	0.00387631	0.136867	0.565025	-0.572384	0.00346855	-0.292778	0.155524
miR-411	down	CLN8	up	-0.570805	0.00358039	-0.092106	0.547334	-0.577438	0.00767404	-0.570805	0.00358039	-0.191224	0.359846
miR-335	down	SCIN	up	-0.569487	0.00367603	-0.283149	0.0594645	0.0634778	0.790339	-0.569487	0.00367603	-0.256197	0.216398
miR-377	down	KIAA1456	up	-0.569443	0.00367931	0.134395	0.37876	-0.732766	0.000238128	-0.569443	0.00367931	-0.126851	0.54569
miR-204	down	FAM71F2	up	-0.56876	0.00372974	-0.0251892	0.869538	-0.106527	0.654872	-0.56876	0.00372974	-0.125855	0.548872
miR-204	down	COL5A3	up	-0.567843	0.00379844	-0.265153	0.0783564	0.132633	0.57723	-0.567843	0.00379844	-0.265411	0.199751
miR-134	down	PDP2	up	-0.567448	0.00382832	-0.236398	0.117952	-0.57648	0.00779944	-0.567448	0.00382832	-0.348795	0.0874824
miR-508	down	SLC9A7	up	-0.567425	0.00383008	0.13751	0.367709	0.499901	0.0248027	-0.567425	0.00383008	0.293585	0.154334
miR-136	down	GNAS	up	-0.567279	0.00384118	-0.453859	0.00173963	0.151843	0.522783	-0.567279	0.00384118	-0.595524	0.00168499
miR-3653	up	HAS2	down	-0.56621	0.00392334	-0.282415	0.0601563	-0.45746	0.0425562	-0.56621	0.00392334	-0.283301	0.169973
miR-335	down	FAXC	up	-0.566076	0.00393373	0.34195	0.0214988	0.0477006	0.841714	-0.566076	0.00393373	-0.0256168	0.903258
miR-891b	up	PKHD1	down	-0.564957	0.00402146	-0.564595	5.34702e-05	-0.23477	0.319087	-0.564957	0.00402146	-0.534956	0.00586337
miR-190a	down	TPPP	up	-0.564943	0.00402257	-0.0152724	0.920683	0.187038	0.429756	-0.564943	0.00402257	0.170685	0.414646
miR-192	down	INSIG1	up	-0.564863	0.00402894	0.107977	0.480177	0.669897	0.001232	-0.564863	0.00402894	0.235079	0.257987
miR-766	up	HNF4A	down	-0.564737	0.00403896	0.0198479	0.897034	-0.23962	0.308899	-0.564737	0.00403896	-0.281925	0.172146
miR-887	down	STRIP2	up	-0.563627	0.00412797	-0.228643	0.130861	0.286698	0.220377	-0.563627	0.00412797	0.155322	0.458471
miR-22	up	C1orf87	down	-0.562851	0.00419115	-0.0149765	0.922215	-0.172636	0.466717	-0.562851	0.00419115	0.0832909	0.692236
miR-3653	up	RHOJ	down	-0.560553	0.0043831	-0.0252833	0.869055	-0.303129	0.193886	-0.560553	0.0043831	-0.354543	0.0820421
miR-892c	up	SEMA3D	down	-0.560134	0.00441889	-0.191256	0.208197	-0.0677561	0.776541	-0.560134	0.00441889	-0.138278	0.509784
miR-141	up	TIAM1	down	-0.559656	0.00446006	0.0934683	0.541398	-0.267333	0.254512	-0.559656	0.00446006	0.515993	0.00828235
miR-675	down	REXO1	up	-0.559371	0.00448476	-0.0743391	0.627448	0.312587	0.17965	-0.559371	0.00448476	-0.0748788	0.722046
miR-335	down	CPEB4	up	-0.557302	0.00466733	0.00986478	0.94872	0.0609501	0.79852	-0.557302	0.00466733	-0.0601468	0.775188
miR-95	down	ITPRIPL2	up	-0.557134	0.00468247	-0.368634	0.0127124	-0.131786	0.579687	-0.557134	0.00468247	0.0488214	0.816734
miR-379	down	NDUFA12	up	-0.557087	0.00468664	-0.341518	0.0216749	-0.583648	0.00690009	-0.557087	0.00468664	-0.441516	0.0271392
miR-204	down	AURKB	up	-0.55535	0.00484536	-0.0952946	0.533491	-0.0880194	0.712123	-0.55535	0.00484536	-0.249922	0.228254
miR-192	down	LSAMP	up	-0.552199	0.00514468	0.132363	0.386076	-0.100545	0.673194	-0.552199	0.00514468	-0.0161989	0.938741
miR-335	down	HEY1	up	-0.549345	0.00542899	-0.299567	0.0455891	-0.0130994	0.956288	-0.549345	0.00542899	-0.250069	0.227972
miR-369	down	SLC38A1	up	-0.549058	0.00545832	-0.15758	0.301225	-0.702001	0.000560153	-0.549058	0.00545832	-0.172513	0.409591
miR-411	down	AKAP6	up	-0.547821	0.00558617	-0.289548	0.0537006	-0.770447	7.05264e-05	-0.547821	0.00558617	-0.477672	0.0157415
miR-195	down	TMEM161B	up	-0.546741	0.00569982	-0.010461	0.945625	-0.267472	0.254255	-0.546741	0.00569982	-0.168767	0.419989
miR-369	down	UST	up	-0.54551	0.00583171	-0.312868	0.0363868	-0.34284	0.138932	-0.54551	0.00583171	-0.568958	0.00299726
miR-181d	down	PRKCD	up	-0.54474	0.00591552	-0.400531	0.00640266	-0.00375894	0.987451	-0.54474	0.00591552	-0.35507	0.0815564
miR-508	down	HIST1H2AG	up	-0.542597	0.0061541	0.342954	0.0210936	0.596297	0.00552067	-0.542597	0.0061541	0.473268	0.016872
miR-885	up	SULT1B1	down	-0.542352	0.00618182	0.118244	0.439164	-0.21734	0.357332	-0.542352	0.00618182	-0.132019	0.529309
miR-379	down	INSIG1	up	-0.54044	0.00640227	-0.250273	0.0972887	-0.0480109	0.840697	-0.54044	0.00640227	-0.123566	0.556223
miR-215	down	CLSPN	up	-0.53989	0.0064669	0.140627	0.356842	-0.0134488	0.955123	-0.53989	0.0064669	0.0917764	0.66261
miR-134	down	KIAA1456	up	-0.539501	0.00651285	0.0839112	0.583677	-0.715689	0.000387992	-0.539501	0.00651285	-0.149954	0.474333
miR-455	down	SLC9A7	up	-0.539408	0.00652397	0.0298883	0.845473	-0.647255	0.00203597	-0.539408	0.00652397	-0.0310449	0.882885
miR-96	up	SULT1B1	down	-0.537729	0.00672606	0.121251	0.427534	-0.311076	0.181874	-0.537729	0.00672606	-0.22679	0.275635
miR-508	down	ITPRIPL2	up	-0.537612	0.00674032	0.382245	0.00956286	0.117901	0.620563	-0.537612	0.00674032	0.251256	0.225697
miR-141	up	UGT2A1	down	-0.537227	0.00678751	0.209223	0.167792	0.303512	0.193295	-0.537227	0.00678751	0.0411649	0.845104
miR-136	down	SLC38A1	up	-0.53689	0.00682901	-0.222718	0.141416	-0.715359	0.000391534	-0.53689	0.00682901	-0.183668	0.379491
miR-585	down	PFKFB2	up	-0.535204	0.00703967	0.0983638	0.520329	0.040703	0.864712	-0.535204	0.00703967	0.0222736	0.915837
miR-335	down	TRIM2	up	-0.534866	0.00708267	-0.427308	0.00341557	-0.0647792	0.786135	-0.534866	0.00708267	-0.356293	0.0804374
miR-337	down	RDH11	up	-0.533977	0.00719651	-0.0903943	0.554835	-0.518826	0.0190804	-0.533977	0.00719651	-0.332442	0.104445
miR-190a	down	ADCYAP1R1	up	-0.53392	0.00720391	-0.484072	0.000754007	0.281252	0.229657	-0.53392	0.00720391	0.00577368	0.978148
miR-1468	up	GATA6	down	-0.532946	0.00733056	-0.279622	0.0628465	-0.191425	0.418818	-0.532946	0.00733056	-0.15138	0.470093
miR-766	up	APOC3	down	-0.532669	0.00736687	0.030554	0.842074	-0.386628	0.0921933	-0.532669	0.00736687	-0.318855	0.120298
miR-874	up	SLCO3A1	down	-0.532499	0.00738928	-0.0391266	0.798583	-0.156577	0.509748	-0.532499	0.00738928	0.102705	0.625174
miR-195	down	PHKA1	up	-0.532313	0.00741381	-0.161832	0.288203	0.00623397	0.97919	-0.532313	0.00741381	-0.0312042	0.882288
miR-888	up	KCNS2	down	-0.531959	0.00746079	-0.322994	0.0304555	-0.135774	0.568166	-0.531959	0.00746079	0.0385867	0.854701
miR-192	down	DTL	up	-0.531013	0.0075873	0.0848791	0.579328	0.0257571	0.914162	-0.531013	0.0075873	0.155665	0.457466
miR-190a	down	KCNQ5	up	-0.530361	0.00767562	-0.0807788	0.59785	0.0017766	0.994069	-0.530361	0.00767562	0.161259	0.441255
miR-141	up	SIRPA	down	-0.52986	0.00774408	0.0702909	0.64636	-0.30295	0.194162	-0.52986	0.00774408	0.0559801	0.79041
miR-766	up	AOC3	down	-0.528408	0.00794531	-0.197604	0.19321	0.386109	0.0926687	-0.528408	0.00794531	0.307738	0.134522
miR-485	down	GRSF1	up	-0.5262	0.00825962	-0.100304	0.512095	-0.760268	0.000100074	-0.5262	0.00825962	-0.262345	0.20519
miR-204	down	SH2D4A	up	-0.526119	0.00827135	-0.775455	3.98223e-10	-0.51384	0.0204738	-0.526119	0.00827135	-0.754871	1.29728e-05
miR-145	down	GOLM1	up	-0.525459	0.00836739	0.00505901	0.973689	-0.602574	0.00492566	-0.525459	0.00836739	-0.257213	0.214519
miR-381	down	INSIG1	up	-0.525171	0.00840954	-0.385644	0.00889028	-0.0130192	0.956556	-0.525171	0.00840954	-0.0998137	0.634996
miR-215	down	DTL	up	-0.524948	0.00844228	0.181725	0.232195	-0.0415566	0.861901	-0.524948	0.00844228	0.0881248	0.675302
miR-377	down	FAM162A	up	-0.521941	0.008895	-0.0314299	0.837607	-0.214757	0.363216	-0.521941	0.008895	0.0152889	0.942176
miR-181c	down	ZNF556	up	-0.521082	0.00902797	0.0620768	0.685407	-0.000262054	0.999125	-0.521082	0.00902797	-0.0661371	0.753445
miR-181c	down	PRKCD	up	-0.519817	0.00922668	-0.528374	0.000190917	-0.0109617	0.963416	-0.519817	0.00922668	-0.29841	0.147362
miR-221	up	CERS2	down	-0.518975	0.00936101	-0.48478	0.000738676	-0.400254	0.080344	-0.518975	0.00936101	-0.44376	0.0262791
miR-497	down	PHKA1	up	-0.518804	0.00938843	-0.0592545	0.699018	-0.315532	0.175365	-0.518804	0.00938843	0.0577166	0.784056
miR-3191	up	PDE3A	down	-0.51685	0.00970727	-0.193997	0.201629	-0.231679	0.325685	-0.51685	0.00970727	-0.283046	0.170374
miR-190a	down	MMP16	up	-0.516799	0.00971569	0.0928905	0.543912	-0.00355567	0.98813	-0.516799	0.00971569	0.173321	0.407366
miR-335	down	B4GALT6	up	-0.515974	0.0098529	-0.0566404	0.71171	-0.0257686	0.914125	-0.515974	0.0098529	-0.0876647	0.676907
miR-183	up	ABHD14A-ACY1	down	-0.515366	0.00995526	-0.000285057	0.998517	-0.47521	0.0342179	-0.515366	0.00995526	0.219889	0.290898
miR-892c	up	EN2	down	-0.515014	0.0100147	-0.642873	1.91834e-06	-0.410112	0.0725035	-0.515014	0.0100147	-0.507364	0.00963134
miR-766	up	AGMAT	down	-0.514333	0.0101309	0.323333	0.0302718	-0.0695984	0.770619	-0.514333	0.0101309	0.496632	0.0115591
miR-182	up	GABRB1	down	-0.513585	0.0102597	-0.362557	0.014382	0.0555942	0.81592	-0.513585	0.0102597	-0.074175	0.724558
miR-576	up	STON2	down	-0.512536	0.0104426	0.115254	0.450903	0.0869203	0.715573	-0.512536	0.0104426	0.254379	0.219789
miR-508	down	HES7	up	-0.510395	0.0108244	0.381728	0.00966885	0.367957	0.110447	-0.510395	0.0108244	-0.0281192	0.893858
miR-506	down	SLC38A1	up	-0.509624	0.0109646	-0.183551	0.227458	0.385543	0.0931889	-0.509624	0.0109646	0.14724	0.482459
miR-887	down	SIGLEC10	up	-0.509374	0.0110105	0.216669	0.152831	0.34194	0.14004	-0.509374	0.0110105	0.238004	0.25194
miR-181d	down	EPS8	up	-0.506888	0.0114745	-0.426337	0.00349736	0.0412223	0.863002	-0.506888	0.0114745	-0.189723	0.3637
miR-154	down	UST	up	-0.506553	0.0115383	-0.415147	0.00457204	-0.277771	0.235719	-0.506553	0.0115383	-0.536363	0.00571049
miR-134	down	INSIG1	up	-0.504792	0.0118782	-0.250017	0.0976421	-0.0506831	0.831949	-0.504792	0.0118782	-0.134634	0.521107
miR-141	up	HDGF	down	-0.50404	0.0120259	-0.101188	0.508364	-0.466983	0.0379077	-0.50404	0.0120259	-0.229691	0.269373
miR-1247	down	B4GALT7	up	-0.503122	0.0122083	-0.0560402	0.714635	-0.111348	0.640243	-0.503122	0.0122083	-0.139361	0.506442
miR-183	up	ITGA8	down	-0.501718	0.0124915	0.0152844	0.920621	0.525464	0.0173439	-0.501718	0.0124915	0.0972551	0.643738
miR-892c	up	PKHD1	down	-0.501173	0.0126029	-0.497001	0.000514721	-0.230045	0.329203	-0.501173	0.0126029	-0.513844	0.00860264
miR-216b	down	WRN	up	-0.499629	0.0129229	0.193133	0.203684	-0.0144718	0.951713	-0.499629	0.0129229	0.0973714	0.64334
miR-200c	up	TMEM119	down	-0.498858	0.0130851	0.186378	0.220254	-0.652449	0.00182083	-0.498858	0.0130851	-0.148863	0.477591
miR-3653	up	SSPN	down	-0.498702	0.0131181	-0.130949	0.391215	-0.130244	0.584171	-0.498702	0.0131181	0.00196653	0.992556
miR-183	up	NEGR1	down	-0.49786	0.0132977	-0.222278	0.142225	-0.281133	0.229863	-0.49786	0.0132977	-0.183638	0.37957
miR-3653	up	EMP2	down	-0.497051	0.013472	0.0887437	0.562114	-0.542757	0.0134078	-0.497051	0.013472	-0.168577	0.420519
miR-215	down	SLC38A1	up	-0.496734	0.0135409	0.155491	0.307762	-0.00880874	0.970598	-0.496734	0.0135409	0.296549	0.150024
miR-199b	down	GNAS	up	-0.496344	0.013626	-0.478853	0.000875959	0.136505	0.566064	-0.496344	0.013626	-0.60097	0.00148812
miR-497	down	PLAG1	up	-0.496271	0.013642	-0.50916	0.000354452	-0.0907963	0.703429	-0.496271	0.013642	-0.496082	0.0116659
miR-145	down	NDUFA4	up	-0.49605	0.0136904	-0.114972	0.45202	-0.369475	0.108873	-0.49605	0.0136904	-0.24117	0.245496
miR-411	down	WNK3	up	-0.494181	0.0141059	-0.238149	0.115174	-0.622051	0.00340574	-0.494181	0.0141059	-0.408671	0.0425306
miR-3653	up	MYADM	down	-0.493767	0.0141992	-0.173653	0.253947	-0.437709	0.0535911	-0.493767	0.0141992	-0.0449347	0.83111
miR-942	up	PTGDR2	down	-0.493032	0.0143664	0.085808	0.575169	0.381329	0.0971313	-0.493032	0.0143664	0.0379261	0.857163
miR-192	down	CLSPN	up	-0.491337	0.0147579	0.0842798	0.582019	0.095253	0.68955	-0.491337	0.0147579	0.258668	0.211846
miR-96	up	GABRB1	down	-0.490383	0.0149818	-0.399742	0.00651748	0.0399596	0.867162	-0.490383	0.0149818	-0.111423	0.59594
miR-377	down	CPEB4	up	-0.490143	0.0150387	-0.0463591	0.762349	-0.557681	0.0106212	-0.490143	0.0150387	-0.237157	0.253681
miR-576	up	PNMA2	down	-0.489714	0.0151407	-0.0275112	0.85763	-0.145837	0.539544	-0.489714	0.0151407	-0.0282983	0.893186
miR-30d	up	FBN2	down	-0.488739	0.0153747	-0.0536713	0.726219	-0.740329	0.000189609	-0.488739	0.0153747	-0.60639	0.00131211
miR-766	up	DAO	down	-0.485249	0.0162365	-0.0792831	0.604669	-0.0145403	0.951485	-0.485249	0.0162365	-0.120409	0.566432
miR-514b	down	ZNF257	up	-0.485137	0.0162648	0.0544829	0.722244	0.0665131	0.780543	-0.485137	0.0162648	0.188234	0.367546
miR-495	down	RDH13	up	-0.484988	0.0163025	-0.169269	0.266317	-0.674271	0.00111268	-0.484988	0.0163025	-0.487567	0.0134264
miR-585	down	EIF5A2	up	-0.482679	0.0168958	0.162312	0.286757	0.0659079	0.782494	-0.482679	0.0168958	0.0569603	0.786822
miR-215	down	INSIG1	up	-0.482412	0.0169656	0.304613	0.0418974	0.551341	0.0117412	-0.482412	0.0169656	0.490197	0.0128607
miR-216b	down	ZNF431	up	-0.482172	0.0170285	0.146623	0.3365	-0.466028	0.0383552	-0.482172	0.0170285	-0.273249	0.186296
miR-487b	down	CPEB4	up	-0.481753	0.0171389	-0.224443	0.138281	-0.491601	0.0277051	-0.481753	0.0171389	-0.0988952	0.638129
miR-495	down	ZNF431	up	-0.481245	0.0172733	-0.251904	0.0950555	-0.42479	0.0619092	-0.481245	0.0172733	-0.324582	0.113415
miR-215	down	CCNE1	up	-0.481212	0.0172822	0.0508366	0.740161	0.181087	0.444838	-0.481212	0.0172822	-0.0492901	0.815005
miR-204	down	LSAMP	up	-0.48096	0.0173492	-0.0284217	0.85297	-0.121144	0.610913	-0.48096	0.0173492	0.156271	0.455697
miR-190a	down	GRID2	up	-0.48079	0.0173945	-0.230494	0.127687	0.288786	0.216886	-0.48079	0.0173945	0.154285	0.461513
miR-215	down	NCAPH	up	-0.479809	0.0176581	0.350234	0.0183452	0.0694701	0.771031	-0.479809	0.0176581	0.244337	0.239161
miR-942	up	SORD	down	-0.479204	0.0178223	0.115096	0.45153	0.227093	0.335619	-0.479204	0.0178223	-0.0500453	0.812219
miR-766	up	ZYG11A	down	-0.477963	0.018163	-0.0366815	0.810933	-0.264099	0.260521	-0.477963	0.018163	-0.156496	0.455039
miR-215	down	BUB1B	up	-0.476683	0.0185198	0.112823	0.460572	0.0267774	0.910775	-0.476683	0.0185198	0.0429823	0.838352
miR-766	up	PAQR7	down	-0.474474	0.0191491	0.0228175	0.88173	0.477219	0.0333607	-0.474474	0.0191491	0.0582637	0.782058
miR-1251	down	KIF2C	up	-0.474413	0.0191667	0.38751	0.00853881	-0.283437	0.225904	-0.474413	0.0191667	0.183689	0.379435
miR-182	up	DDAH1	down	-0.473038	0.0195674	-0.404139	0.00589992	0.606549	0.00457696	-0.473038	0.0195674	-0.3003	0.144691
miR-508	down	TANGO2	up	-0.472207	0.0198127	-0.1008	0.51	0.301245	0.19681	-0.472207	0.0198127	-0.0641675	0.760575
miR-887	down	IGSF6	up	-0.47199	0.0198772	0.277847	0.0646057	0.230375	0.32849	-0.47199	0.0198772	0.0490338	0.81595
miR-192	down	ZNF273	up	-0.470878	0.0202106	-0.120451	0.430609	0.485977	0.0298192	-0.470878	0.0202106	0.148153	0.479717
miR-3191	up	C1R	down	-0.470701	0.0202639	-0.243053	0.10766	-0.488571	0.0288288	-0.470701	0.0202639	-0.37704	0.0631791
miR-3653	up	PDE4C	down	-0.470681	0.0202699	0.157254	0.30224	-0.313669	0.178066	-0.470681	0.0202699	-0.149098	0.47689
miR-651	up	PTPRB	down	-0.470433	0.0203451	-0.0233999	0.878734	-0.0643835	0.787413	-0.470433	0.0203451	0.118031	0.574177
miR-495	down	MTRNR2L3	up	-0.469805	0.0205363	-0.0816806	0.593754	-0.128525	0.589183	-0.469805	0.0205363	-0.152124	0.467887
miR-216a	down	OXGR1	up	-0.469422	0.0206536	0.086962	0.570021	-0.00493674	0.98352	-0.469422	0.0206536	0.11443	0.585993
miR-485	down	KIAA1328	up	-0.469222	0.0207151	-0.313439	0.0360293	-0.704015	0.000531351	-0.469222	0.0207151	-0.495235	0.0118319
miR-335	down	NNT	up	-0.468402	0.0209687	0.148828	0.329203	0.26439	0.259978	-0.468402	0.0209687	0.0342052	0.871056
miR-891b	up	GATA6	down	-0.46835	0.020985	-0.259912	0.0846631	0.0347294	0.884429	-0.46835	0.020985	-0.214367	0.303487
miR-136	down	BSND	up	-0.467986	0.0210985	-0.093421	0.541604	-0.64391	0.00218549	-0.467986	0.0210985	-0.35887	0.0781184
miR-3653	up	ATCAY	down	-0.467129	0.0213676	0.0437385	0.775424	-0.209712	0.374864	-0.467129	0.0213676	0.0378205	0.857557
miR-483	down	RAB3B	up	-0.466522	0.0215596	0.0576294	0.706899	-0.202268	0.392432	-0.466522	0.0215596	-0.0155652	0.941133
miR-654	down	CLN8	up	-0.466412	0.0215946	-0.209268	0.167697	-0.62594	0.00315477	-0.466412	0.0215946	-0.403405	0.0455367
miR-192	down	PIM1	up	-0.463847	0.0224237	-0.092917	0.543797	-0.0866352	0.71647	-0.463847	0.0224237	-0.272853	0.186961
miR-95	down	LIMCH1	up	-0.463739	0.0224591	-0.504696	0.000407139	-0.393564	0.0860113	-0.463739	0.0224591	-0.244302	0.23923
miR-195	down	E2F7	up	-0.463423	0.022563	0.156323	0.305146	0.0962389	0.686492	-0.463423	0.022563	0.324491	0.113522
miR-141	up	MYOCD	down	-0.462654	0.022818	0.145299	0.340929	-0.159277	0.502384	-0.462654	0.022818	0.0719502	0.732519
miR-335	down	CPT1B	up	-0.4625	0.0228693	-0.472642	0.00104383	-0.0792414	0.739827	-0.4625	0.0228693	-0.470067	0.0177349
miR-335	down	TNS4	up	-0.461799	0.0231041	-0.0209392	0.891405	0.15047	0.526595	-0.461799	0.0231041	-0.0600772	0.775441
miR-195	down	NNT	up	-0.461611	0.0231671	-0.027963	0.855317	-0.0777488	0.744569	-0.461611	0.0231671	-0.156134	0.456094
miR-190a	down	IGF1	up	-0.460985	0.0233789	-0.160786	0.291371	0.346673	0.134281	-0.460985	0.0233789	0.0426753	0.839491
miR-185	up	NTRK3	down	-0.45872	0.0241578	0.215714	0.154692	0.0486036	0.838756	-0.45872	0.0241578	0.251264	0.225682
miR-335	down	DHCR7	up	-0.458268	0.0243156	-0.637437	2.49104e-06	-0.0908571	0.703239	-0.458268	0.0243156	-0.285158	0.16707
miR-508	down	CYP1A2	up	-0.457544	0.0245705	0.295687	0.0486029	0.388808	0.0902168	-0.457544	0.0245705	0.398455	0.0485127
miR-145	down	CPEB4	up	-0.457477	0.0245939	0.116786	0.444866	-0.545481	0.0128593	-0.457477	0.0245939	-0.33152	0.105469
miR-1468	up	SGK1	down	-0.457287	0.0246614	-0.320883	0.0316208	-0.346587	0.134385	-0.457287	0.0246614	-0.364931	0.072864
miR-576	up	ITGB8	down	-0.455788	0.0251969	0.0124109	0.935509	-0.282641	0.227265	-0.455788	0.0251969	0.22188	0.28644
miR-651	up	ITM2C	down	-0.455676	0.0252373	0.0550535	0.719453	-0.129865	0.585273	-0.455676	0.0252373	-0.112748	0.591546
miR-3653	up	PRPF38A	down	-0.455111	0.0254422	-0.27885	0.0636071	-0.134665	0.571359	-0.455111	0.0254422	0.097413	0.643197
miR-215	down	FAM71F2	up	-0.454678	0.0255996	0.0290729	0.849639	0.446421	0.0484829	-0.454678	0.0255996	0.142344	0.497297
miR-192	down	CCNE1	up	-0.454191	0.0257781	0.0446096	0.771071	-0.154698	0.514903	-0.454191	0.0257781	-0.0629737	0.764906
miR-3653	up	LIPG	down	-0.453219	0.026137	-0.244657	0.105287	-0.0954461	0.688951	-0.453219	0.026137	-0.313366	0.127177
miR-181c	down	SPIRE1	up	-0.451059	0.0269486	0.182442	0.230326	-0.0472589	0.843163	-0.451059	0.0269486	0.126761	0.545976
miR-185	up	ZC3H12B	down	-0.450014	0.0273486	-0.0458276	0.764996	-0.115167	0.628747	-0.450014	0.0273486	-0.498818	0.0111424
miR-335	down	LRRC4	up	-0.449817	0.0274248	-0.57755	3.26834e-05	-0.182894	0.440229	-0.449817	0.0274248	-0.587364	0.00202157
miR-183	up	DDAH1	down	-0.449726	0.0274596	-0.201437	0.18454	0.574951	0.00800325	-0.449726	0.0274596	-0.248945	0.230138
miR-335	down	NUPR1	up	-0.449575	0.0275181	-0.0760319	0.619609	-0.243232	0.301441	-0.449575	0.0275181	0.0419492	0.842189
miR-377	down	NDUFA12	up	-0.449562	0.027523	-0.256054	0.0895524	-0.487966	0.0290573	-0.449562	0.027523	-0.210458	0.312598
miR-192	down	CEP78	up	-0.448575	0.0279072	-0.050892	0.739888	0.470944	0.0360944	-0.448575	0.0279072	0.0177409	0.932922
miR-671	up	ACY1	down	-0.446104	0.0288874	0.179817	0.237217	0.289097	0.216369	-0.446104	0.0288874	0.100677	0.632058
miR-616	up	HLA-DOB	down	-0.445924	0.0289602	-0.166872	0.273249	-0.252313	0.283178	-0.445924	0.0289602	-0.322991	0.115297
miR-1180	down	PLA2G16	up	-0.445582	0.0290983	-0.161345	0.289675	-0.416515	0.0677268	-0.445582	0.0290983	-0.319572	0.11942
miR-130a	down	SECISBP2L	up	-0.445545	0.029113	-0.502473	0.000435912	-0.736625	0.000212193	-0.445545	0.029113	-0.345208	0.091012
miR-335	down	VPS9D1	up	-0.44534	0.029196	-0.382372	0.00953707	-0.41164	0.0713415	-0.44534	0.029196	-0.369178	0.069346
miR-891b	up	RNF125	down	-0.445034	0.0293205	-0.144146	0.344814	-0.57367	0.0081772	-0.445034	0.0293205	-0.27819	0.178142
miR-96	up	ACY1	down	-0.443976	0.0297536	0.0613453	0.688925	0.417525	0.0669957	-0.443976	0.0297536	0.372102	0.0670011
miR-215	down	PIM1	up	-0.442865	0.0302142	-0.130835	0.391632	-0.221094	0.348881	-0.442865	0.0302142	-0.211337	0.310536
miR-190a	down	AKAP2	up	-0.442662	0.0302987	-0.203444	0.180114	0.26688	0.255348	-0.442662	0.0302987	-0.0784905	0.709195
miR-377	down	RDH13	up	-0.442498	0.0303673	-0.147196	0.334591	-0.691018	0.000741566	-0.442498	0.0303673	-0.288883	0.161352
miR-192	down	NCAPH	up	-0.442026	0.0305658	-0.0428689	0.779777	-0.0724707	0.76141	-0.442026	0.0305658	0.045159	0.830279
miR-379	down	HIST1H3H	up	-0.441949	0.0305983	-0.289999	0.0533125	0.273858	0.242655	-0.441949	0.0305983	-0.232792	0.262782
miR-206	down	MET	up	-0.441742	0.0306855	-0.123401	0.419323	-0.0400669	0.866809	-0.441742	0.0306855	-0.198632	0.341177
miR-299	down	HIST1H3H	up	-0.441263	0.030888	-0.261914	0.0822088	0.0709304	0.766345	-0.441263	0.030888	-0.228453	0.272033
miR-192	down	EEF1A2	up	-0.441252	0.0308925	-0.0122543	0.936321	-0.184871	0.435217	-0.441252	0.0308925	-0.107656	0.6085
miR-190a	down	LILRB1	up	-0.441215	0.0309084	0.211884	0.162327	0.0875221	0.713684	-0.441215	0.0309084	0.480498	0.0150491
miR-182	up	KCNJ10	down	-0.440758	0.031103	-0.273611	0.0689617	0.0729477	0.759884	-0.440758	0.031103	0.127496	0.543633
miR-335	down	KLRF1	up	-0.440583	0.0311777	0.0375233	0.806676	0.100092	0.674588	-0.440583	0.0311777	-0.0453664	0.82951
miR-335	down	NEURL2	up	-0.440393	0.0312591	-0.487524	0.000681929	-0.239722	0.308687	-0.440393	0.0312591	-0.41557	0.0388314
miR-96	up	PODXL	down	-0.439575	0.0316108	0.10771	0.481271	0.127563	0.591997	-0.439575	0.0316108	-0.287988	0.162713
miR-127	down	SORL1	up	-0.439234	0.0317586	-0.165491	0.277294	-0.671437	0.00118881	-0.439234	0.0317586	-0.4023	0.0461883
miR-22	up	SRSF7	down	-0.439105	0.0318147	-0.265499	0.0779525	-0.481397	0.0316322	-0.439105	0.0318147	-0.482903	0.0144798
miR-483	down	ZFP64	up	-0.438256	0.0321852	-0.0997694	0.514356	0.103398	0.664434	-0.438256	0.0321852	-0.144195	0.491659
miR-185	up	CAMK4	down	-0.437428	0.0325502	0.152382	0.317651	-0.134261	0.572526	-0.437428	0.0325502	0.193845	0.353173
miR-206	down	G6PD	up	-0.437205	0.0326488	0.0382764	0.802872	-0.43546	0.0549743	-0.437205	0.0326488	0.0502524	0.811455
miR-483	down	IGF1	up	-0.43691	0.03278	-0.0369051	0.809801	0.187592	0.428369	-0.43691	0.03278	0.181411	0.385476
miR-335	down	COX17	up	-0.436417	0.0329999	-0.305221	0.0414694	0.0419695	0.860542	-0.436417	0.0329999	-0.232665	0.263049
miR-335	down	SYT17	up	-0.436329	0.033039	-0.584032	2.53466e-05	-0.3818	0.0966853	-0.436329	0.033039	-0.627756	0.000781029
miR-495	down	SC5D	up	-0.436034	0.0331714	-0.141551	0.353661	-0.700992	0.000575066	-0.436034	0.0331714	-0.416543	0.0383308
miR-671	up	PODXL	down	-0.435499	0.0334126	-0.16494	0.278918	-0.040983	0.86379	-0.435499	0.0334126	-0.0257565	0.902733
miR-190a	down	ITPRIPL2	up	-0.434001	0.0340944	-0.274492	0.0680372	0.223099	0.344415	-0.434001	0.0340944	0.148594	0.478397
miR-130a	down	RDH11	up	-0.431298	0.0353535	-0.306603	0.0405102	-0.695485	0.000662552	-0.431298	0.0353535	-0.471247	0.0174128
miR-377	down	CLN8	up	-0.428639	0.0366273	-0.0317529	0.835961	-0.423463	0.062816	-0.428639	0.0366273	-0.154168	0.461856
miR-615	down	GINS2	up	-0.428178	0.036852	0.0342138	0.823442	0.0759018	0.75045	-0.428178	0.036852	0.264846	0.200747
miR-671	up	HDGF	down	-0.427708	0.0370821	-0.439181	0.00254277	-0.321954	0.166267	-0.427708	0.0370821	-0.297719	0.148345
miR-3152	up	MUC15	down	-0.427012	0.0374249	0.283753	0.0589	-0.0270975	0.909713	-0.427012	0.0374249	0.227953	0.273112
miR-382	down	PPM1A	up	-0.426654	0.0376023	-0.373498	0.011498	-0.672352	0.00116376	-0.426654	0.0376023	-0.603443	0.00140546
miR-187	up	RAD9B	down	-0.426488	0.0376848	0.0380853	0.803837	0.0371544	0.876416	-0.426488	0.0376848	-0.210098	0.313447
miR-514b	down	TMEM161B	up	-0.425063	0.038398	0.0871986	0.568968	0.248851	0.290057	-0.425063	0.038398	0.267095	0.196806
miR-204	down	E2F2	up	-0.424884	0.0384881	-0.0997282	0.514531	-0.217899	0.356067	-0.424884	0.0384881	-0.148142	0.479753
miR-335	down	FOXI1	up	-0.424268	0.0388005	-0.596623	1.52259e-05	0.0853837	0.720407	-0.424268	0.0388005	-0.506917	0.009706
miR-890	up	ABCC9	down	-0.423169	0.0393629	0.104287	0.495396	-0.233024	0.322803	-0.423169	0.0393629	0.0409607	0.845863
miR-506	down	TMC5	up	-0.423131	0.0393822	0.280574	0.0619184	0.179503	0.448898	-0.423131	0.0393822	0.107856	0.607831
miR-455	down	RDH13	up	-0.42262	0.0396457	-0.437714	0.00263869	-0.870854	5.88483e-07	-0.42262	0.0396457	-0.700281	9.72074e-05
miR-192	down	ATP10D	up	-0.422342	0.03979	0.112282	0.462739	0.377702	0.100621	-0.422342	0.03979	0.0905615	0.666823
miR-616	up	EMCN	down	-0.422064	0.0399342	-0.102507	0.502824	-0.132083	0.578826	-0.422064	0.0399342	-0.0292486	0.88962
miR-181d	down	SPIRE1	up	-0.421266	0.0403513	0.163768	0.282397	0.158334	0.504949	-0.421266	0.0403513	0.217979	0.295214
miR-455	down	BCAS4	up	-0.420744	0.040626	-0.245415	0.104179	-0.589013	0.00628405	-0.420744	0.040626	-0.221003	0.288398
miR-335	down	CEND1	up	-0.418971	0.0415695	-0.390135	0.00806459	-0.368209	0.110185	-0.418971	0.0415695	-0.238939	0.250024
miR-335	down	SYNGR3	up	-0.418541	0.0418007	-0.598515	1.40768e-05	0.0393707	0.869104	-0.418541	0.0418007	-0.42815	0.0327455
miR-190a	down	APOL6	up	-0.41797	0.0421097	-0.12989	0.395091	0.284756	0.223657	-0.41797	0.0421097	0.0499547	0.812553
miR-376c	down	REPIN1	up	-0.417556	0.0423343	-0.22153	0.143607	-0.45851	0.0420231	-0.417556	0.0423343	-0.174306	0.404664
miR-891a	up	ORAI2	down	-0.417278	0.0424861	-0.33061	0.0265427	-0.644546	0.00215635	-0.417278	0.0424861	-0.439386	0.027977
miR-766	up	WNK2	down	-0.415545	0.043441	-0.340766	0.0219843	0.0643206	0.787616	-0.415545	0.043441	-0.113502	0.589055
miR-181d	down	CPOX	up	-0.414442	0.0440578	-0.1624	0.286491	0.333655	0.150532	-0.414442	0.0440578	-0.255389	0.217901
miR-190a	down	E2F8	up	-0.414226	0.0441792	0.0313564	0.837981	0.17974	0.448288	-0.414226	0.0441792	0.134426	0.521757
miR-214	down	TOM1	up	-0.414212	0.0441869	-0.111867	0.464405	-0.126573	0.5949	-0.414212	0.0441869	-0.182694	0.382069
miR-616	up	BBOX1	down	-0.413658	0.0445002	0.00285674	0.985141	0.366511	0.111963	-0.413658	0.0445002	0.183642	0.379558
miR-874	up	STAT3	down	-0.413645	0.0445071	-0.26123	0.0830404	-0.553789	0.0112979	-0.413645	0.0445071	-0.510823	0.00907016
miR-585	down	CALM3	up	-0.413092	0.0448218	-0.106853	0.484787	-0.254383	0.279112	-0.413092	0.0448218	-0.222837	0.284314
miR-3191	up	ACSM2B	down	-0.413072	0.0448328	0.0169785	0.911856	-0.399351	0.081092	-0.413072	0.0448328	-0.0734179	0.727264
miR-204	down	HRK	up	-0.412983	0.0448839	0.343949	0.0206988	0.0592792	0.803939	-0.412983	0.0448839	0.394016	0.0513088
miR-1180	down	TBX1	up	-0.412488	0.0451667	-0.182308	0.230675	0.328665	0.157109	-0.412488	0.0451667	0.073174	0.728137
miR-192	down	CAV1	up	-0.412268	0.0452928	0.015023	0.921975	-0.075259	0.7525	-0.412268	0.0452928	-0.246997	0.233925
miR-3607	up	TM4SF1	down	-0.411947	0.0454773	-0.123776	0.417899	-0.210065	0.374042	-0.411947	0.0454773	-0.341669	0.0945991
miR-3191	up	A1CF	down	-0.410706	0.0461967	0.0320456	0.834469	-0.19428	0.41178	-0.410706	0.0461967	-0.0727806	0.729545
miR-615	down	CYC1	up	-0.410415	0.046367	0.0872885	0.568568	-0.1332	0.575589	-0.410415	0.046367	0.253893	0.220702
miR-455	down	SOX11	up	-0.409981	0.0466217	-0.22983	0.128819	0.26303	0.262528	-0.409981	0.0466217	-0.07198	0.732412
miR-335	down	RRAGD	up	-0.408662	0.0474016	0.235637	0.119174	0.0222499	0.925817	-0.408662	0.0474016	-0.118787	0.571708
miR-616	up	PKP1	down	-0.407682	0.0479876	-0.0366873	0.810903	-0.0475106	0.842337	-0.407682	0.0479876	0.27605	0.181642
miR-381	down	C14orf2	up	-0.407054	0.0483661	-0.283934	0.0587312	-0.123466	0.604044	-0.407054	0.0483661	-0.261906	0.205978
miR-576	up	HNF4G	down	-0.406673	0.0485968	0.273403	0.0691816	-0.31284	0.179279	-0.406673	0.0485968	0.218178	0.294762
miR-22	up	H3F3B	down	-0.406034	0.0489858	-0.00898984	0.953263	0.0329154	0.89043	-0.406034	0.0489858	0.165693	0.428626
miR-141	up	EPHA7	down	-0.405621	0.0492387	-0.191099	0.208579	-0.533681	0.015372	-0.405621	0.0492387	-0.357902	0.0789832

## Sheet: KIRC
miRNA	miRNA regulated status	Target gene	Gene regulate status	r_hc	p_hc	r_early	p_early	r_advanced	p_advanced	r_normal	p_normal	r_tumor	p_tumor
miR-203a	down	PDE7A	up	-0.826322	7.18781e-19	-0.0211909	0.711969	0.0644401	0.361027	-0.826322	7.18781e-19	-0.244268	0.0372813
miR-203a	down	SPATA18	up	-0.82204	1.54355e-18	0.0108625	0.849902	0.108306	0.124018	-0.82204	1.54355e-18	0.0104303	0.93021
miR-210	up	SCN7A	down	-0.820532	2.01061e-18	-0.119757	0.0362719	-0.0944231	0.180242	-0.820532	2.01061e-18	-0.508491	4.36981e-06
miR-200b	down	LOX	up	-0.815703	4.61139e-18	-0.316054	1.58971e-08	-0.23149	0.000890169	-0.815703	4.61139e-18	-0.233704	0.0465964
miR-200b	down	PMEPA1	up	-0.811141	9.88072e-18	-0.252029	8.08507e-06	-0.226019	0.00118504	-0.811141	9.88072e-18	-0.0425917	0.720504
miR-215	up	C6orf132	down	-0.808038	1.64029e-17	-0.061464	0.283813	0.0400635	0.570361	-0.808038	1.64029e-17	-0.0474891	0.689916
miR-215	up	SLC16A5	down	-0.77661	1.73957e-15	-0.360887	7.62951e-11	-0.21456	0.00211204	-0.77661	1.73957e-15	-0.25787	0.0276223
miR-215	up	ERMP1	down	-0.768568	5.08966e-15	-0.444461	3.01017e-16	-0.190708	0.00642129	-0.768568	5.08966e-15	-0.390102	0.000645485
miR-452	up	WNK1	down	-0.760445	1.44208e-14	-0.0999644	0.0808316	0.0430035	0.542389	-0.760445	1.44208e-14	0.1006	0.397081
miR-362	down	CHST15	up	-0.740212	1.6285e-13	-0.423846	9.01451e-15	-0.0980532	0.163992	-0.740212	1.6285e-13	-0.13657	0.249272
miR-30b	down	CHST15	up	-0.736116	2.58923e-13	-0.295317	1.42013e-07	-0.0932352	0.185809	-0.736116	2.58923e-13	-0.199047	0.0913651
miR-204	down	HTR1F	up	-0.72787	6.42021e-13	0.0422644	0.461348	-0.0645451	0.360243	-0.72787	6.42021e-13	-0.0142739	0.904596
miR-629	up	SLC12A3	down	-0.724684	9.03839e-13	-0.129402	0.0235818	-0.0969336	0.168882	-0.724684	9.03839e-13	-0.219086	0.0625668
miR-200b	down	TAF1D	up	-0.720695	1.37779e-12	-0.116412	0.041855	0.0335303	0.634847	-0.720695	1.37779e-12	-0.178982	0.129749
miR-203b	down	TAF1D	up	-0.713666	2.84652e-12	-0.0354521	0.536698	-0.0946871	0.179022	-0.713666	2.84652e-12	-0.0269393	0.821017
miR-216b	down	SLFN13	up	-0.713634	2.85562e-12	-0.0931248	0.103974	-0.2922	2.33487e-05	-0.713634	2.85562e-12	-0.27295	0.0194712
miR-224	up	LDHD	down	-0.710108	4.07602e-12	-0.409647	8.21684e-14	-0.213047	0.00227461	-0.710108	4.07602e-12	-0.287938	0.0135024
miR-204	down	ANGPTL2	up	-0.697957	1.33583e-11	0.230636	4.64097e-05	0.0227718	0.747084	-0.697957	1.33583e-11	0.122059	0.303608
miR-629	up	PITPNM3	down	-0.69573	1.6498e-11	-0.0969285	0.0905307	-0.0438262	0.534685	-0.69573	1.6498e-11	-0.085026	0.474473
miR-885	up	XPNPEP2	down	-0.693158	2.1007e-11	0.09121	0.111314	-0.0805692	0.253161	-0.693158	2.1007e-11	0.0619614	0.602533
miR-20b	down	RUNX3	up	-0.690473	2.69587e-11	-0.0583422	0.309029	-0.0219679	0.755725	-0.690473	2.69587e-11	0.125221	0.29116
miR-342	up	RHOBTB3	down	-0.689769	2.877e-11	0.0229203	0.689632	0.0962476	0.171932	-0.689769	2.877e-11	-0.0334058	0.779039
miR-532	down	PXDN	up	-0.687724	3.47097e-11	-0.538286	2.18827e-24	-0.379904	2.26563e-08	-0.687724	3.47097e-11	-0.425206	0.000176914
miR-452	up	PANK1	down	-0.685543	4.23276e-11	-0.106848	0.0619319	0.034285	0.627242	-0.685543	4.23276e-11	-0.0718893	0.545575
miR-342	up	POU2F3	down	-0.684516	4.64507e-11	-0.048442	0.398437	-0.11674	0.0971759	-0.684516	4.64507e-11	-0.287796	0.0135504
miR-675	down	KCNQ5	up	-0.682512	5.56166e-11	-0.0539461	0.346964	0.0173574	0.80584	-0.682512	5.56166e-11	-0.0385716	0.745946
miR-215	up	HSPA2	down	-0.681144	6.28439e-11	-0.439307	7.19779e-16	-0.12757	0.0697109	-0.681144	6.28439e-11	-0.124754	0.292975
miR-21	up	CPEB3	down	-0.678006	8.29675e-11	-0.446864	1.99477e-16	-0.475622	7.4432e-13	-0.678006	8.29675e-11	-0.429513	0.000149441
miR-142	up	PEBP1	down	-0.676085	9.81796e-11	-0.116075	0.0424546	-0.362676	1.05153e-07	-0.676085	9.81796e-11	-0.326976	0.00474994
miR-1271	up	ACY1	down	-0.675406	1.04168e-10	0.000201268	0.997202	-0.0559227	0.428083	-0.675406	1.04168e-10	0.169899	0.150708
miR-532	down	PTAFR	up	-0.673925	1.18466e-10	-0.344546	5.90031e-10	-0.0480004	0.49646	-0.673925	1.18466e-10	-0.127467	0.282521
miR-215	up	SYNGR1	down	-0.673843	1.1931e-10	-0.197996	0.000494162	0.0433431	0.539203	-0.673843	1.1931e-10	-0.0395833	0.739517
miR-200b	down	FLT1	up	-0.673547	1.22413e-10	-0.229084	5.23581e-05	-0.06574	0.351401	-0.673547	1.22413e-10	0.00823497	0.944873
miR-141	down	TRPV2	up	-0.672459	1.34456e-10	-0.267014	2.15805e-06	0.0788834	0.26326	-0.672459	1.34456e-10	-0.0921242	0.438237
miR-200c	down	VEGFA	up	-0.668253	1.92577e-10	-0.314205	1.94599e-08	-0.202793	0.00371108	-0.668253	1.92577e-10	-0.20435	0.0828852
miR-675	down	SPARC	up	-0.667658	2.02517e-10	0.219869	0.000105335	0.483801	2.62883e-13	-0.667658	2.02517e-10	0.414044	0.000271157
miR-215	up	ZDHHC2	down	-0.666652	2.20458e-10	-0.378193	7.67553e-12	-0.132981	0.0585706	-0.666652	2.20458e-10	-0.236139	0.0442945
miR-30b	down	LHFPL2	up	-0.666227	2.2848e-10	-0.216515	0.000134896	-0.308757	7.39655e-06	-0.666227	2.2848e-10	-0.196975	0.0948564
miR-200a	down	PMEPA1	up	-0.664002	2.75265e-10	-0.169277	0.00297325	-0.313997	5.06557e-06	-0.664002	2.75265e-10	-0.0891211	0.453374
miR-21	up	LONRF2	down	-0.660868	3.56882e-10	-0.122374	0.0323577	-0.116412	0.0981268	-0.660868	3.56882e-10	-0.192822	0.102172
miR-200a	down	VCAM1	up	-0.653678	6.40258e-10	0.0464361	0.418278	0.402952	2.51685e-09	-0.653678	6.40258e-10	0.466333	3.20724e-05
miR-210	up	XKR4	down	-0.649678	8.80299e-10	-0.0880514	0.124305	-0.170573	0.0149681	-0.649678	8.80299e-10	-0.265095	0.0234147
miR-342	up	SREBF2	down	-0.648182	9.90444e-10	-0.316726	1.47659e-08	0.00918508	0.896517	-0.648182	9.90444e-10	-0.115641	0.329929
miR-500a	down	TNFAIP2	up	-0.647067	1.08089e-09	-0.12805	0.0250899	0.00784233	0.911578	-0.647067	1.08089e-09	-0.165331	0.162158
miR-20b	down	SPIB	up	-0.645614	1.21069e-09	-0.0313377	0.585013	0.00459213	0.948155	-0.645614	1.21069e-09	0.0225499	0.849807
miR-203a	down	VEGFA	up	-0.644912	1.27864e-09	0.10063	0.0788213	0.0816524	0.246816	-0.644912	1.27864e-09	-0.133493	0.260195
miR-342	up	SLC6A12	down	-0.643939	1.37882e-09	-0.0998718	0.0811145	-0.0886138	0.20867	-0.643939	1.37882e-09	-0.0411441	0.729633
miR-20b	down	SACS	up	-0.639756	1.9009e-09	0.0833372	0.145844	0.0631518	0.370727	-0.639756	1.9009e-09	0.21246	0.071139
miR-532	down	RUNX3	up	-0.636207	2.48691e-09	-0.367482	3.23136e-11	0.0126636	0.857686	-0.636207	2.48691e-09	0.0564351	0.63533
miR-200c	down	WIPF1	up	-0.634914	2.74022e-09	-0.233026	3.8481e-05	0.015266	0.82885	-0.634914	2.74022e-09	0.0120326	0.919522
let-7e	down	PLEKHO1	up	-0.632288	3.33247e-09	-0.201298	0.0003953	-0.0797933	0.257775	-0.632288	3.33247e-09	-0.263719	0.0241716
miR-141	down	VEGFA	up	-0.629753	4.01862e-09	-0.338097	1.28115e-09	-0.220621	0.00156141	-0.629753	4.01862e-09	-0.170795	0.148534
miR-215	up	HOXB9	down	-0.628845	4.29554e-09	-0.465954	6.74586e-18	-0.248146	0.000357388	-0.628845	4.29554e-09	-0.36826	0.00134799
miR-200b	down	VEGFA	up	-0.626207	5.20645e-09	-0.197784	0.000501243	0.136116	0.0528189	-0.626207	5.20645e-09	-0.0138929	0.907131
miR-362	down	PAG1	up	-0.617741	9.53723e-09	-0.396076	6.17322e-13	0.00608383	0.93135	-0.617741	9.53723e-09	0.00660243	0.955789
miR-20b	down	CCL5	up	-0.617737	9.54002e-09	-0.025198	0.660624	-0.0320314	0.650062	-0.617737	9.54002e-09	-0.0332888	0.779794
miR-452	up	CLDN16	down	-0.616969	1.00693e-08	-0.0801797	0.161788	0.0596167	0.398159	-0.616969	1.00693e-08	0.113863	0.33747
miR-200c	down	FLT1	up	-0.616555	1.03661e-08	-0.270064	1.63305e-06	-0.340143	6.86266e-07	-0.616555	1.03661e-08	-0.220349	0.0610324
miR-142	up	ADPRHL1	down	-0.616486	1.04166e-08	-0.129213	0.0237877	0.142975	0.0418543	-0.616486	1.04166e-08	0.0471672	0.691912
miR-342	up	LSAMP	down	-0.615742	1.09741e-08	-0.174623	0.00217132	0.113234	0.107713	-0.615742	1.09741e-08	-0.00101283	0.993215
miR-155	up	PEBP1	down	-0.614789	1.17292e-08	-0.344285	6.09016e-10	-0.476944	6.30296e-13	-0.614789	1.17292e-08	-0.405471	0.000372683
miR-342	up	CPEB3	down	-0.613301	1.30076e-08	-0.143265	0.012114	-0.0162952	0.817507	-0.613301	1.30076e-08	-0.190862	0.105774
miR-20b	down	MYO1F	up	-0.609977	1.63586e-08	-0.0520417	0.364276	-0.0328592	0.641641	-0.609977	1.63586e-08	0.0161566	0.892084
miR-21	up	EPM2A	down	-0.608757	1.77822e-08	-0.458161	2.75829e-17	-0.383979	1.55503e-08	-0.608757	1.77822e-08	-0.375477	0.00106278
miR-106b	up	PFKFB2	down	-0.608515	1.80776e-08	-0.276988	8.56128e-07	0.0180989	0.797721	-0.608515	1.80776e-08	0.0692927	0.560217
miR-210	up	MRO	down	-0.607514	1.93535e-08	-0.138405	0.0153992	0.0772605	0.273239	-0.607514	1.93535e-08	0.133635	0.259684
miR-142	up	HOXA7	down	-0.606216	2.11337e-08	-0.199901	0.000434656	-0.240944	0.000534428	-0.606216	2.11337e-08	-0.275522	0.0183097
miR-532	down	C3orf36	up	-0.605427	2.22914e-08	-0.310194	3.00324e-08	-0.0224891	0.75012	-0.605427	2.22914e-08	-0.137102	0.247413
miR-142	up	PIP4K2C	down	-0.604275	2.40907e-08	-0.0797609	0.163997	0.053669	0.446961	-0.604275	2.40907e-08	0.0618804	0.603008
miR-142	up	SLC24A2	down	-0.602811	2.65735e-08	-0.177925	0.00178017	-0.0381784	0.588648	-0.602811	2.65735e-08	-0.110334	0.352753
miR-106b	up	ACADSB	down	-0.59502	4.4439e-08	-0.312352	2.37973e-08	-0.237068	0.000660374	-0.59502	4.4439e-08	-0.273099	0.0194019
miR-204	down	43160	up	-0.592702	5.16501e-08	-0.111816	0.0506883	-0.218812	0.00171019	-0.592702	5.16501e-08	-0.0386082	0.745714
miR-532	down	MYO1F	up	-0.592372	5.27605e-08	-0.270635	1.54936e-06	-0.0648618	0.357886	-0.592372	5.27605e-08	-0.113981	0.336965
miR-452	up	THRB	down	-0.591626	5.53602e-08	-0.157452	0.00577554	0.206393	0.00313309	-0.591626	5.53602e-08	-0.0679214	0.568024
miR-362	down	PIK3CG	up	-0.590436	5.97591e-08	-0.343096	7.03466e-10	0.0116823	0.86861	-0.590436	5.97591e-08	-0.105546	0.37416
miR-106b	up	LDHD	down	-0.58697	7.45349e-08	-0.304277	5.62969e-08	-0.0851905	0.226863	-0.58697	7.45349e-08	-0.0682591	0.566096
miR-21	up	COBLL1	down	-0.586389	7.73257e-08	-0.285986	3.60126e-07	-0.294589	1.98661e-05	-0.586389	7.73257e-08	-0.198893	0.0916209
miR-224	up	DNAJC28	down	-0.586075	7.88747e-08	-0.25838	4.66541e-06	-0.207171	0.00301944	-0.586075	7.88747e-08	-0.0740457	0.533558
miR-1271	up	ABHD14A-ACY1	down	-0.585623	8.11594e-08	0.0232111	0.685904	-0.0896002	0.203629	-0.585623	8.11594e-08	0.0747923	0.529429
miR-452	up	CMTM4	down	-0.584865	8.51305e-08	-0.25422	6.69889e-06	0.116267	0.0985483	-0.584865	8.51305e-08	-0.0666902	0.575076
miR-200c	down	TAF1D	up	-0.583844	9.07695e-08	-0.0770608	0.178788	-0.0241979	0.731833	-0.583844	9.07695e-08	-0.0661302	0.578298
miR-342	up	PLXNA4	down	-0.582097	1.01244e-07	0.215366	0.000146698	0.280355	5.09271e-05	-0.582097	1.01244e-07	0.235434	0.0449515
miR-20b	down	GRAMD1A	up	-0.581977	1.02002e-07	-0.00669386	0.907164	-0.113231	0.107723	-0.581977	1.02002e-07	0.000341022	0.997715
miR-20b	down	IFNAR2	up	-0.581116	1.07615e-07	-0.11081	0.0528173	-0.0732257	0.29915	-0.581116	1.07615e-07	-0.109174	0.357868
miR-532	down	CCR2	up	-0.580391	1.12572e-07	-0.214409	0.000157263	0.0738257	0.295197	-0.580391	1.12572e-07	0.0798893	0.501667
miR-500a	down	TNFRSF13C	up	-0.579091	1.21994e-07	-0.0462581	0.420066	-0.0367641	0.602542	-0.579091	1.21994e-07	-0.0858041	0.470423
miR-21	up	TRIM2	down	-0.577754	1.32464e-07	-0.471538	2.40508e-18	-0.413674	8.53917e-10	-0.577754	1.32464e-07	-0.360336	0.00173924
miR-532	down	NPFFR1	up	-0.577392	1.3544e-07	-0.0362524	0.527538	0.0670094	0.342158	-0.577392	1.3544e-07	-0.0194974	0.869947
miR-501	down	IL21R	up	-0.577214	1.36928e-07	-0.0575811	0.315394	0.0840607	0.233106	-0.577214	1.36928e-07	0.0562492	0.636447
miR-362	down	E2F1	up	-0.576704	1.41275e-07	0.124051	0.0300444	-0.00406515	0.954098	-0.576704	1.41275e-07	0.0596414	0.616211
miR-20b	down	RAB42	up	-0.575491	1.52143e-07	-0.0616167	0.282616	0.0474127	0.501754	-0.575491	1.52143e-07	0.106936	0.367865
miR-141	down	MAP4K4	up	-0.572988	1.77123e-07	-0.301401	7.60247e-08	-0.0459379	0.515165	-0.572988	1.77123e-07	-0.000497205	0.996669
miR-500a	down	SH2B3	up	-0.570943	2.00348e-07	-0.217654	0.00012408	0.0971232	0.168046	-0.570943	2.00348e-07	-0.0694471	0.559341
miR-215	up	UGT8	down	-0.570327	2.07896e-07	-0.197018	0.000527592	0.176044	0.011991	-0.570327	2.07896e-07	-0.19936	0.090845
miR-142	up	NAP1L2	down	-0.570303	2.08194e-07	-0.12997	0.0229718	0.180398	0.0100077	-0.570303	2.08194e-07	0.167248	0.157276
miR-200b	down	IL12RB2	up	-0.56732	2.4873e-07	0.0816413	0.154252	0.0547835	0.437567	-0.56732	2.4873e-07	0.167876	0.155703
miR-500a	down	KLRD1	up	-0.565545	2.7629e-07	-0.0688034	0.230114	0.00921256	0.89621	-0.565545	2.7629e-07	-0.0199391	0.867027
miR-500a	down	POLQ	up	-0.565337	2.79699e-07	-0.0530427	0.35511	0.0934188	0.184941	-0.565337	2.79699e-07	0.15687	0.185042
miR-508	down	KLHDC8A	up	-0.563881	3.04698e-07	-0.0824532	0.150182	-0.054454	0.440332	-0.563881	3.04698e-07	-0.0393682	0.740883
miR-532	down	ORC6	up	-0.563028	3.20318e-07	0.135158	0.0180059	-0.0100611	0.886712	-0.563028	3.20318e-07	0.0696045	0.558449
miR-215	up	RHOBTB3	down	-0.562927	3.22222e-07	-0.469402	3.57625e-18	-0.256021	0.00022705	-0.562927	3.22222e-07	-0.288924	0.0131722
miR-362	down	FAM57A	up	-0.562637	3.2774e-07	-0.344654	5.82267e-10	0.00629228	0.929004	-0.562637	3.2774e-07	-0.00735109	0.950782
miR-20b	down	KLRD1	up	-0.562581	3.28806e-07	-0.0238907	0.677215	0.0581503	0.409885	-0.562581	3.28806e-07	-0.0877871	0.460189
miR-532	down	HTR7	up	-0.562344	3.33393e-07	-0.0154094	0.788339	0.147066	0.0362752	-0.562344	3.33393e-07	-0.0601997	0.612907
miR-500a	down	PLA2G16	up	-0.561181	3.56757e-07	0.137943	0.0157486	-0.155421	0.0268148	-0.561181	3.56757e-07	0.101094	0.394757
miR-203b	down	CORO7	up	-0.561062	3.59249e-07	-0.00277328	0.961466	0.136542	0.0520753	-0.561062	3.59249e-07	-0.0949776	0.424121
miR-215	up	SLC48A1	down	-0.560467	3.71873e-07	-0.174153	0.00223299	0.0520427	0.46087	-0.560467	3.71873e-07	0.0766455	0.519247
miR-200a	down	IL12RB2	up	-0.56043	3.72668e-07	0.113037	0.048202	0.118018	0.0935468	-0.56043	3.72668e-07	0.180059	0.127419
miR-21	up	CLCN5	down	-0.557741	4.35311e-07	-0.344215	6.14236e-10	-0.537281	1.40467e-16	-0.557741	4.35311e-07	-0.471529	2.54395e-05
miR-20b	down	CD28	up	-0.556863	4.57805e-07	-0.0372416	0.516325	0.0994702	0.157954	-0.556863	4.57805e-07	0.0534658	0.653252
miR-141	down	SPIB	up	-0.556332	4.71947e-07	-0.0790659	0.167713	0.15643	0.0258301	-0.556332	4.71947e-07	0.211238	0.0728179
miR-532	down	CCR4	up	-0.553677	5.49082e-07	-0.249598	9.94149e-06	0.0664475	0.34623	-0.553677	5.49082e-07	0.0394472	0.740381
miR-500a	down	CKAP2L	up	-0.551918	6.06541e-07	-0.118411	0.0384373	0.194181	0.00550263	-0.551918	6.06541e-07	0.300623	0.00975853
miR-532	down	KLRD1	up	-0.549636	6.89558e-07	-0.0286144	0.61806	-0.0475304	0.500691	-0.549636	6.89558e-07	-0.0180854	0.879292
miR-1251	down	ALDOA	up	-0.547869	7.61081e-07	0.0690856	0.228204	0.0844057	0.231187	-0.547869	7.61081e-07	0.122969	0.299992
miR-20b	down	TNIP3	up	-0.544139	9.35676e-07	0.0261358	0.648824	0.0743487	0.29178	-0.544139	9.35676e-07	0.148205	0.210812
miR-224	up	DIO1	down	-0.542967	9.97867e-07	-0.190047	0.000833669	-0.025761	0.715237	-0.542967	9.97867e-07	0.0493315	0.678532
miR-532	down	CELSR3	up	-0.540042	1.17049e-06	-0.0921521	0.107653	-0.00490372	0.944642	-0.540042	1.17049e-06	-0.129119	0.27628
miR-3065	down	FJX1	up	-0.538045	1.30415e-06	0.100743	0.0784852	-0.201856	0.00387651	-0.538045	1.30415e-06	-0.122327	0.302542
miR-106b	up	SLC25A33	down	-0.537083	1.37349e-06	-0.190892	0.000789381	0.0181894	0.796731	-0.537083	1.37349e-06	-0.0360825	0.761839
miR-660	down	PCDH17	up	-0.534189	1.60371e-06	-0.327905	4.20908e-09	-0.123566	0.079018	-0.534189	1.60371e-06	-0.136349	0.250045
miR-660	down	PXDN	up	-0.531911	1.80986e-06	-0.415151	3.53241e-14	-0.273284	7.97937e-05	-0.531911	1.80986e-06	-0.260682	0.0259142
miR-203b	down	CORO1C	up	-0.531481	1.85148e-06	-0.280676	6.02515e-07	-0.0494993	0.483096	-0.531481	1.85148e-06	-0.279266	0.0167255
miR-141	down	SIRPA	up	-0.530595	1.94008e-06	-0.461278	1.57728e-17	-0.31602	4.36817e-06	-0.530595	1.94008e-06	-0.258861	0.0270099
miR-1271	up	PODXL	down	-0.530064	1.99502e-06	0.0758848	0.18553	0.0324777	0.645516	-0.530064	1.99502e-06	-0.136737	0.248687
miR-155	up	THRB	down	-0.529998	2.00195e-06	-0.419353	1.83469e-14	-0.316021	4.36803e-06	-0.529998	2.00195e-06	-0.295137	0.0112491
miR-206	down	GJA1	up	-0.529307	2.07596e-06	0.0112709	0.844328	-0.00356824	0.959703	-0.529307	2.07596e-06	-0.113088	0.340787
miR-362	down	ABCA12	up	-0.527799	2.24641e-06	-0.331968	2.63339e-09	-0.107972	0.125191	-0.527799	2.24641e-06	-0.208065	0.0773267
miR-215	up	CA8	down	-0.526241	2.4364e-06	0.00258163	0.964127	-0.0504085	0.475085	-0.526241	2.4364e-06	-0.0527489	0.657609
miR-142	up	PTPN4	down	-0.526218	2.43927e-06	-0.000394567	0.994515	0.0730834	0.300093	-0.526218	2.43927e-06	-0.00492598	0.967008
miR-204	down	TREM1	up	-0.525239	2.56631e-06	-0.087533	0.126545	-0.378628	2.54613e-08	-0.525239	2.56631e-06	-0.370403	0.00125681
miR-204	down	PLAUR	up	-0.52516	2.57688e-06	-0.24582	1.36502e-05	-0.581393	9.46837e-20	-0.52516	2.57688e-06	-0.498549	7.16234e-06
miR-149	down	PDE7A	up	-0.524885	2.61381e-06	-0.124647	0.0292562	-0.0877671	0.213069	-0.524885	2.61381e-06	-0.25487	0.029548
miR-203a	down	GXYLT2	up	-0.522906	2.89464e-06	0.153461	0.00715725	-0.021331	0.762593	-0.522906	2.89464e-06	0.181183	0.12502
let-7e	down	IKZF3	up	-0.522707	2.92436e-06	-0.265981	2.37e-06	-0.302022	1.19072e-05	-0.522707	2.92436e-06	-0.315714	0.006511
miR-501	down	CDC6	up	-0.520431	3.28564e-06	0.0124647	0.828085	0.0774952	0.27178	-0.520431	3.28564e-06	0.190976	0.105561
miR-188	down	CD44	up	-0.51969	3.41207e-06	-0.20618	0.000282322	-0.239744	0.000570822	-0.51969	3.41207e-06	-0.301981	0.00941747
miR-142	up	TMEM30B	down	-0.517533	3.80638e-06	-0.191231	0.000772214	0.162019	0.0209191	-0.517533	3.80638e-06	0.0295551	0.803968
miR-21	up	PTPN3	down	-0.514725	4.38387e-06	-0.451592	8.79354e-17	-0.364615	8.88595e-08	-0.514725	4.38387e-06	-0.409637	0.000319658
miR-200c	down	POLR2F	up	-0.51341	4.68175e-06	-0.11727	0.0403567	0.121722	0.083629	-0.51341	4.68175e-06	0.0389145	0.743765
miR-106b	up	DNAJC28	down	-0.513304	4.70646e-06	-0.319325	1.10796e-08	-0.0640278	0.364114	-0.513304	4.70646e-06	-0.238025	0.0425775
miR-216b	down	SHROOM1	up	-0.512257	4.95838e-06	-0.0892412	0.11928	-0.105338	0.134725	-0.512257	4.95838e-06	-0.354061	0.00211857
miR-203b	down	LAX1	up	-0.511954	5.03366e-06	-0.11564	0.0432401	0.201716	0.00390182	-0.511954	5.03366e-06	0.144144	0.223727
miR-501	down	KLRD1	up	-0.510667	5.36505e-06	0.0173295	0.76271	-0.0175848	0.803347	-0.510667	5.36505e-06	-0.0849614	0.47481
miR-106b	up	NNT	down	-0.510568	5.39127e-06	-0.378983	6.88888e-12	-0.0826158	0.241266	-0.510568	5.39127e-06	-0.0106171	0.928963
miR-200b	down	MYB	up	-0.509436	5.70095e-06	-0.0573862	0.317038	-0.00792251	0.910678	-0.509436	5.70095e-06	0.182295	0.122682
miR-501	down	TLR6	up	-0.50919	5.77052e-06	0.00316466	0.956033	0.0818298	0.245787	-0.50919	5.77052e-06	-0.0173969	0.883854
miR-21	up	SLC5A3	down	-0.508829	5.87374e-06	-0.0068677	0.904764	0.0437027	0.535839	-0.508829	5.87374e-06	0.206655	0.0794004
miR-188	down	HLA-DOB	up	-0.508435	5.98852e-06	-0.0412076	0.472639	0.0318755	0.651654	-0.508435	5.98852e-06	-0.00611612	0.959043
miR-106b	up	LGSN	down	-0.507783	6.18319e-06	0.0159986	0.780448	0.163157	0.0200247	-0.507783	6.18319e-06	0.00611335	0.959062
miR-500a	down	MIXL1	up	-0.506681	6.5258e-06	-0.0805074	0.160075	-0.0976071	0.165927	-0.506681	6.5258e-06	-0.192408	0.102925
miR-215	up	PCSK9	down	-0.506113	6.70894e-06	-0.327506	4.40548e-09	-0.2145	0.00211823	-0.506113	6.70894e-06	-0.310613	0.00748246
miR-20b	down	MELK	up	-0.505981	6.7525e-06	0.245463	1.40619e-05	-0.0205548	0.770987	-0.505981	6.7525e-06	0.199064	0.0913363
miR-21	up	WNK3	down	-0.505527	6.90314e-06	-0.354551	1.71013e-10	-0.125968	0.0733222	-0.505527	6.90314e-06	-0.167016	0.157863
miR-30b	down	SYTL3	up	-0.505327	6.9708e-06	-0.171681	0.00258412	-0.0397487	0.573396	-0.505327	6.9708e-06	-0.148567	0.209689
miR-501	down	ITPRIPL1	up	-0.503587	7.58444e-06	-0.0405977	0.479222	0.137553	0.0503428	-0.503587	7.58444e-06	-0.00924853	0.938101
miR-500a	down	F2RL3	up	-0.500787	8.67857e-06	-0.188366	0.000928735	-0.0347595	0.622481	-0.500787	8.67857e-06	-0.184208	0.118738
miR-21	up	GPD1L	down	-0.50078	8.68166e-06	-0.473991	1.51976e-18	-0.370847	5.13444e-08	-0.50078	8.68166e-06	-0.434857	0.000120823
miR-20b	down	CTSS	up	-0.500501	8.7985e-06	0.038853	0.498328	0.0837372	0.234915	-0.500501	8.7985e-06	0.0677685	0.568897
miR-20b	down	DEGS1	up	-0.500094	8.97163e-06	-0.0636863	0.26673	0.00731559	0.917496	-0.500094	8.97163e-06	0.131957	0.26577
miR-20b	down	NABP1	up	-0.499546	9.20973e-06	0.0248963	0.66444	0.0195409	0.781993	-0.499546	9.20973e-06	0.216848	0.0653627
miR-215	up	PLAU	down	-0.49903	9.43892e-06	-0.0138437	0.809411	-0.260746	0.000171745	-0.49903	9.43892e-06	-0.092727	0.435233
miR-660	down	ABCA12	up	-0.498715	9.58182e-06	-0.326911	4.71578e-09	-0.0567327	0.421413	-0.498715	9.58182e-06	-0.229151	0.0511637
miR-20b	down	SLC24A4	up	-0.498025	9.90148e-06	-0.00748997	0.896181	0.0839519	0.233713	-0.498025	9.90148e-06	0.00899266	0.93981
miR-215	up	BTC	down	-0.496908	1.04402e-05	-0.266112	2.34216e-06	0.0792226	0.261206	-0.496908	1.04402e-05	-0.0073486	0.950799
miR-215	up	TDRD1	down	-0.496652	1.05674e-05	0.0558314	0.330348	0.040975	0.561616	-0.496652	1.05674e-05	0.125711	0.289259
miR-362	down	SLC7A11	up	-0.495825	1.09886e-05	0.0508904	0.374998	-0.150201	0.0324378	-0.495825	1.09886e-05	-0.112393	0.343783
miR-21	up	ERBB2	down	-0.495408	1.12069e-05	-0.23688	2.83301e-05	-0.371031	5.05098e-08	-0.495408	1.12069e-05	-0.296442	0.0108775
miR-204	down	TCF4	up	-0.495399	1.12118e-05	0.207159	0.000263647	0.0756004	0.283709	-0.495399	1.12118e-05	0.220188	0.0612265
miR-20b	down	F2RL3	up	-0.493903	1.20283e-05	-0.0949001	0.0975152	0.0112827	0.873065	-0.493903	1.20283e-05	-0.244529	0.0370728
miR-500b	down	POLQ	up	-0.493563	1.22216e-05	0.0370939	0.517991	-0.116648	0.0974426	-0.493563	1.22216e-05	0.0915325	0.441196
miR-532	down	SCN9A	up	-0.492547	1.28168e-05	-0.218765	0.00011432	-0.0871355	0.216393	-0.492547	1.28168e-05	-0.0460261	0.699005
miR-106b	up	UQCRFS1	down	-0.491783	1.32816e-05	-0.372688	1.61754e-11	-0.0254629	0.718391	-0.491783	1.32816e-05	-0.0782761	0.510371
miR-21	up	ACAT1	down	-0.491563	1.34184e-05	-0.585389	1.55641e-29	-0.516381	3.12573e-15	-0.491563	1.34184e-05	-0.603688	1.57111e-08
miR-215	up	COBLL1	down	-0.490702	1.39665e-05	-0.45424	5.52723e-17	-0.12697	0.0710453	-0.490702	1.39665e-05	-0.33129	0.00419631
miR-532	down	CD200	up	-0.489861	1.45221e-05	-0.430901	2.89062e-15	-0.117941	0.093761	-0.489861	1.45221e-05	-0.377323	0.000999202
miR-200c	down	NOG	up	-0.487973	1.58448e-05	-0.236662	2.88296e-05	-0.0720003	0.307332	-0.487973	1.58448e-05	-0.179651	0.128297
miR-501	down	TNIP3	up	-0.486823	1.6705e-05	0.0899697	0.116282	0.0385192	0.585322	-0.486823	1.6705e-05	0.261111	0.025662
miR-20b	down	CAMK2N2	up	-0.486484	1.69669e-05	0.0483414	0.399418	-0.0631943	0.370404	-0.486484	1.69669e-05	0.0788844	0.50708
miR-1269a	up	OPHN1	down	-0.48495	1.81989e-05	-0.0943968	0.099313	-0.0287308	0.684077	-0.48495	1.81989e-05	-0.193294	0.101319
miR-362	down	CD180	up	-0.480872	2.18932e-05	-0.135421	0.017782	0.0148357	0.833604	-0.480872	2.18932e-05	-0.0890694	0.453637
miR-224	up	PCSK2	down	-0.480046	2.27223e-05	-0.104905	0.0668573	-0.0203743	0.772943	-0.480046	2.27223e-05	-0.0395867	0.739495
let-7e	down	SPN	up	-0.479979	2.27905e-05	-0.255727	5.88046e-06	-0.232298	0.000852885	-0.479979	2.27905e-05	-0.331082	0.00422169
miR-204	down	CACNG8	up	-0.479749	2.30267e-05	-0.0231119	0.687175	-0.188058	0.00721204	-0.479749	2.30267e-05	-0.237221	0.0433024
miR-149	down	CES3	up	-0.479488	2.32978e-05	-0.362179	6.45825e-11	-0.383851	1.57372e-08	-0.479488	2.32978e-05	-0.449866	6.52397e-05
miR-215	up	PTPRT	down	-0.478677	2.41601e-05	-0.0813793	0.155582	-0.0276522	0.695335	-0.478677	2.41601e-05	-0.00458375	0.969299
miR-500b	down	CCR6	up	-0.477841	2.50789e-05	-0.284046	4.3514e-07	-0.100284	0.154562	-0.477841	2.50789e-05	-0.291517	0.0123376
miR-500b	down	TNFSF8	up	-0.477202	2.58034e-05	-0.185717	0.00109903	-0.00391298	0.955814	-0.477202	2.58034e-05	-0.0822349	0.48915
miR-20b	down	B2M	up	-0.476971	2.60695e-05	-0.0375011	0.513404	0.0276516	0.695342	-0.476971	2.60695e-05	-0.039761	0.73839
miR-142	up	LGR5	down	-0.4767	2.63861e-05	-0.0554715	0.33348	-0.138722	0.0484009	-0.4767	2.63861e-05	-0.115178	0.331881
miR-532	down	KIFC1	up	-0.476673	2.6418e-05	-0.301191	7.76994e-08	-0.0182869	0.795665	-0.476673	2.6418e-05	0.0998966	0.400409
miR-2355	up	BSND	down	-0.474978	2.84791e-05	-0.220927	9.73531e-05	0.000718287	0.991885	-0.474978	2.84791e-05	0.00225797	0.984874
miR-215	up	TMEM164	down	-0.474738	2.87824e-05	-0.190764	0.000795923	-0.131384	0.0616951	-0.474738	2.87824e-05	-0.181596	0.124148
miR-362	down	SLC1A4	up	-0.474646	2.88998e-05	-0.314337	1.91824e-08	0.0804328	0.253968	-0.474646	2.88998e-05	0.0483845	0.684375
miR-532	down	CDCA8	up	-0.474598	2.89615e-05	-0.234625	3.39123e-05	-0.0523668	0.458079	-0.474598	2.89615e-05	0.0935801	0.431002
miR-20b	down	BTN3A3	up	-0.473291	3.06789e-05	-0.0477178	0.405534	0.0291535	0.679682	-0.473291	3.06789e-05	-0.0510662	0.66788
miR-660	down	VSIG1	up	-0.472735	3.14367e-05	-0.411296	6.39074e-14	-0.294869	1.94915e-05	-0.472735	3.14367e-05	-0.252987	0.0308134
miR-20b	down	E2F2	up	-0.472378	3.19333e-05	0.135765	0.0174913	0.106662	0.129865	-0.472378	3.19333e-05	0.209371	0.0754453
miR-20b	down	FXYD5	up	-0.472349	3.19743e-05	-0.0708223	0.216694	-0.188795	0.00698396	-0.472349	3.19743e-05	-0.0928732	0.434506
miR-215	up	RAP1GAP	down	-0.47145	3.32583e-05	-0.0317335	0.580279	0.212426	0.00234454	-0.47145	3.32583e-05	-0.0459829	0.699273
miR-30b	down	RAD51	up	-0.471347	3.3408e-05	-0.239364	2.31941e-05	-0.389306	9.43447e-09	-0.471347	3.3408e-05	-0.25766	0.0277537
miR-142	up	ZNF676	down	-0.470885	3.40898e-05	-0.186266	0.00106156	-0.0313483	0.657045	-0.470885	3.40898e-05	-0.158188	0.181332
miR-138-1	down	CCND2	up	-0.470707	3.43549e-05	0.0643985	0.261408	0.0295788	0.675273	-0.470707	3.43549e-05	0.168099	0.155146
miR-629	up	SKIDA1	down	-0.470158	3.5187e-05	-0.0595811	0.29885	-0.105464	0.134254	-0.470158	3.5187e-05	-0.0857891	0.470502
miR-629	up	ACSL6	down	-0.470057	3.53419e-05	-0.129997	0.0229439	-0.0719101	0.30794	-0.470057	3.53419e-05	-0.0384568	0.746677
miR-30b	down	KLHDC8A	up	-0.468584	3.7677e-05	-0.180495	0.00152162	-0.00260009	0.970631	-0.468584	3.7677e-05	-0.0569709	0.632119
miR-362	down	EHD2	up	-0.468109	3.8461e-05	-0.558416	1.73797e-26	-0.222253	0.00143745	-0.468109	3.8461e-05	-0.304729	0.00875869
miR-20b	down	MIXL1	up	-0.467749	3.90631e-05	0.0336383	0.557749	0.0205429	0.771117	-0.467749	3.90631e-05	-0.0819017	0.490918
miR-141	down	ELAVL4	up	-0.46644	4.13332e-05	-0.120172	0.035627	0.099237	0.158936	-0.46644	4.13332e-05	0.0753893	0.526138
miR-142	up	CHAC1	down	-0.466045	4.20426e-05	-0.0776952	0.175227	0.0262582	0.709986	-0.466045	4.20426e-05	-0.195827	0.0968362
miR-362	down	RAP2B	up	-0.465373	4.32735e-05	-0.00267156	0.962878	0.00712743	0.91961	-0.465373	4.32735e-05	-0.194432	0.0992856
miR-146b	up	RHOBTB3	down	-0.46453	4.48656e-05	0.137555	0.0160473	0.33107	1.40252e-06	-0.46453	4.48656e-05	0.245409	0.0363759
miR-500a	down	ITPRIPL1	up	-0.464443	4.5032e-05	-0.142963	0.0122981	0.189554	0.00675578	-0.464443	4.5032e-05	0.00239394	0.983963
let-7e	down	COL8A1	up	-0.463541	4.68022e-05	-0.0181068	0.752406	0.180382	0.0100141	-0.463541	4.68022e-05	-0.0236566	0.842528
let-7e	down	EFHD2	up	-0.46351	4.68642e-05	-0.262656	3.1956e-06	-0.159355	0.0231492	-0.46351	4.68642e-05	-0.370179	0.00126608
miR-224	up	SLC23A1	down	-0.461416	5.12284e-05	0.232734	3.9375e-05	0.119039	0.090723	-0.461416	5.12284e-05	0.184782	0.117574
miR-20b	down	STX4	up	-0.46037	5.35452e-05	-0.0685454	0.231871	-0.165871	0.0180246	-0.46037	5.35452e-05	0.00761755	0.949001
miR-30b	down	SLC35G2	up	-0.459023	5.66751e-05	-0.255304	6.09996e-06	-0.0108214	0.878214	-0.459023	5.66751e-05	-0.204536	0.0826003
miR-660	down	NFAM1	up	-0.45872	5.74017e-05	-0.234554	3.41023e-05	-0.00371763	0.958018	-0.45872	5.74017e-05	-0.104863	0.377279
miR-363	down	LHFPL2	up	-0.457159	6.12843e-05	0.0480194	0.402569	-0.00278628	0.968529	-0.457159	6.12843e-05	0.08805	0.458842
miR-216b	down	CACNG8	up	-0.457091	6.14585e-05	0.0613265	0.284893	0.187338	0.00744163	-0.457091	6.14585e-05	0.0897501	0.450179
miR-20b	down	POLQ	up	-0.456852	6.20743e-05	0.154251	0.0068624	0.0464186	0.510774	-0.456852	6.20743e-05	0.0902036	0.447884
miR-362	down	LILRB1	up	-0.456695	6.24836e-05	-0.343149	6.98941e-10	-0.107778	0.125872	-0.456695	6.24836e-05	-0.0775213	0.514471
miR-501	down	CD84	up	-0.455929	6.45118e-05	0.0746554	0.192776	0.135258	0.0543445	-0.455929	6.45118e-05	0.0390376	0.742983
miR-106b	up	ABCG8	down	-0.455906	6.4574e-05	-0.0658164	0.251031	-0.00148312	0.983245	-0.455906	6.4574e-05	0.0993301	0.403099
miR-345	down	HIST1H2AG	up	-0.455244	6.63784e-05	0.0726511	0.20503	-0.03652	0.604954	-0.455244	6.63784e-05	0.112881	0.341677
miR-20b	down	RRM2	up	-0.455136	6.66768e-05	0.152849	0.00739364	0.049292	0.484932	-0.455136	6.66768e-05	0.21497	0.0677872
miR-30b	down	SIPA1	up	-0.453765	7.05804e-05	-0.228487	5.48319e-05	-0.00767108	0.913502	-0.453765	7.05804e-05	-0.0996782	0.401444
miR-362	down	NTM	up	-0.452642	7.3931e-05	-0.3626	6.11575e-11	-0.317387	3.94981e-06	-0.452642	7.3931e-05	-0.286592	0.0139642
miR-362	down	EVI2A	up	-0.45241	7.46401e-05	-0.284283	4.25244e-07	-0.11732	0.095515	-0.45241	7.46401e-05	-0.0280238	0.813938
miR-1271	up	PITPNM3	down	-0.450859	7.95576e-05	-0.0355956	0.535049	-0.0582179	0.40934	-0.450859	7.95576e-05	0.0347677	0.770274
miR-203a	down	C15orf48	up	-0.450327	8.13109e-05	0.0295638	0.606448	0.0466344	0.508809	-0.450327	8.13109e-05	-0.083616	0.481857
miR-142	up	BTG2	down	-0.448288	8.83672e-05	0.0400564	0.485106	0.0745401	0.290536	-0.448288	8.83672e-05	0.123692	0.297135
miR-206	down	FSTL1	up	-0.445816	9.76832e-05	-0.0441669	0.441407	-0.00314725	0.964454	-0.445816	9.76832e-05	-0.0626991	0.598211
miR-30b	down	TGFA	up	-0.445049	0.000100752	-0.454402	5.37175e-17	0.0848453	0.228758	-0.445049	0.000100752	-0.317821	0.00614334
miR-203b	down	EFHD2	up	-0.444597	0.000102599	-0.11973	0.0363145	0.0353988	0.616091	-0.444597	0.000102599	-0.27977	0.0165218
miR-188	down	FPR1	up	-0.444268	0.000103967	-0.160149	0.0049828	-0.0794488	0.259843	-0.444268	0.000103967	-0.231718	0.0485453
miR-224	up	LONRF2	down	-0.442022	0.00011375	-0.0751778	0.189672	-0.0422668	0.549334	-0.442022	0.00011375	0.00337235	0.97741
miR-363	down	AEN	up	-0.441287	0.000117133	0.121931	0.0329942	0.0501845	0.477052	-0.441287	0.000117133	0.202044	0.0864919
miR-188	down	CDCA8	up	-0.440152	0.000122539	-0.139719	0.0144417	0.0352041	0.618035	-0.440152	0.000122539	-0.0242035	0.838935
miR-20b	down	FMNL3	up	-0.439908	0.000123733	-0.0905006	0.114135	0.0163383	0.817033	-0.439908	0.000123733	-0.150056	0.205105
miR-362	down	CACNG8	up	-0.439834	0.000124095	-0.164523	0.00390315	-0.105179	0.135317	-0.439834	0.000124095	-0.370268	0.00126238
miR-21	up	POLR3B	down	-0.438039	0.000133218	-0.388728	1.77154e-12	0.0641015	0.363561	-0.438039	0.000133218	-0.156299	0.186668
miR-21	up	PPARA	down	-0.437991	0.000133474	-0.371089	2.00315e-11	-0.343206	5.36333e-07	-0.437991	0.000133474	-0.450979	6.22517e-05
miR-660	down	BTN2A2	up	-0.436533	0.00014135	0.028045	0.625072	0.170276	0.0151473	-0.436533	0.00014135	0.261575	0.0253914
miR-500a	down	SIGLEC8	up	-0.436146	0.000143508	-0.027092	0.636882	0.113106	0.108114	-0.436146	0.000143508	-0.0415714	0.726934
miR-20b	down	PKMYT1	up	-0.435712	0.000145969	0.124844	0.0290001	-0.0629201	0.372489	-0.435712	0.000145969	0.0854781	0.472118
let-7e	down	TRPV1	up	-0.435277	0.000148474	-0.156346	0.00613223	-0.239238	0.000586831	-0.435277	0.000148474	-0.0309114	0.795164
miR-200b	down	SERPINH1	up	-0.43519	0.000148982	-0.377335	8.62902e-12	-0.374411	3.73208e-08	-0.43519	0.000148982	-0.273275	0.0193209
miR-3065	down	ITGA5	up	-0.434759	0.00015151	-0.184415	0.00119285	-0.210542	0.00256892	-0.434759	0.00015151	-0.158868	0.179438
miR-204	down	BDNF	up	-0.434637	0.000152232	0.357121	1.23537e-10	0.304741	9.83882e-06	-0.434637	0.000152232	0.394616	0.000550805
miR-20b	down	PLEKHO2	up	-0.434282	0.000154352	-0.0496712	0.386562	0.0152247	0.829306	-0.434282	0.000154352	0.157213	0.184072
miR-501	down	RPS19	up	-0.434052	0.000155738	-0.190696	0.000799444	-0.358841	1.46209e-07	-0.434052	0.000155738	-0.279559	0.0166069
miR-142	up	CRH	down	-0.433253	0.000160657	-0.142515	0.0125767	-0.0825563	0.241606	-0.433253	0.000160657	-0.0958991	0.419619
miR-30b	down	SERPINE1	up	-0.432825	0.000163344	-0.275195	1.0137e-06	-0.169999	0.0153156	-0.432825	0.000163344	-0.206076	0.0802643
let-7e	down	LIMD2	up	-0.432772	0.000163679	-0.26883	1.8287e-06	-0.215253	0.00204116	-0.432772	0.000163679	-0.33862	0.00338596
miR-106b	up	PDHB	down	-0.431157	0.000174234	-0.355053	1.60518e-10	-0.000319658	0.996389	-0.431157	0.000174234	-0.0273356	0.818428
miR-629	up	RAB3B	down	-0.430961	0.000175553	-0.27611	9.30107e-07	0.0956171	0.174771	-0.430961	0.000175553	0.116131	0.327871
miR-452	up	NDNF	down	-0.430339	0.000179812	0.00616179	0.914513	0.207827	0.00292648	-0.430339	0.000179812	0.143677	0.225247
miR-206	down	MET	up	-0.430299	0.000180091	-0.14464	0.0113043	0.134395	0.0559154	-0.430299	0.000180091	0.0566078	0.634294
miR-660	down	GPR55	up	-0.430251	0.000180423	-0.166907	0.00340823	0.00732111	0.917434	-0.430251	0.000180423	-0.0365122	0.759088
miR-200a	down	MYB	up	-0.428145	0.000195603	-0.0734471	0.200098	-0.0491644	0.486065	-0.428145	0.000195603	0.178474	0.130859
miR-508	down	HIST1H2AG	up	-0.427462	0.000200768	-0.0327738	0.567922	-0.0607046	0.38959	-0.427462	0.000200768	-0.15436	0.192261
miR-584	up	CCBE1	down	-0.426948	0.000204739	-0.0724921	0.206026	-0.0317253	0.653188	-0.426948	0.000204739	-0.106393	0.370316
miR-20b	down	SOD2	up	-0.425801	0.000213868	-0.123583	0.0306754	0.151636	0.0308009	-0.425801	0.000213868	0.0829207	0.485522
miR-30b	down	TRAF3IP2	up	-0.425645	0.000215138	-0.392304	1.06396e-12	0.0350361	0.619713	-0.425645	0.000215138	-0.22566	0.0549082
let-7e	down	CPA4	up	-0.422759	0.000239911	-0.119454	0.0367505	-0.0998571	0.156335	-0.422759	0.000239911	-0.180988	0.125434
miR-20b	down	TNFRSF10B	up	-0.422009	0.000246758	0.0166438	0.771835	0.103299	0.14248	-0.422009	0.000246758	0.117341	0.322822
[truncated: 341 more rows]

## Sheet: KIRP
miRNA	miRNA regulated status	Target gene	Gene regulate status	r_hc	p_hc	r_early	p_early	r_advanced	p_advanced	r_normal	p_normal	r_tumor	p_tumor
[truncated: 366 more rows]

[truncated: 5 more sheets: LIHC, LUAD, LUSC, STAD, THCA]
