# Supplementary material for: Integrated Analysis of MicroRNA (miRNA) and mRNA Profiles Reveals Reduced Correlation between MicroRNA and Target Gene in Cancer
Source: Biomed Res Int. 2018 Dec 6;2018:1972606. doi: 10.1155/2018/1972606 (PMC6304515; doi:10.1155/2018/1972606)
Supplement: Supplementary Materials — Figure S1. Expression density distribution of mRNAs and miRNAs before and after filtering. Figure S2. Distribution of the PCC values of critical miRNA-target gene pairs in healthy controls and 4 clinically staged tumors. Figure S3: Simple correlations coefficients (Cor) and partial correlation coefficients (Pcor) of critical pairs in normal and tumor samples of LIHC. Figure S4: Simple correlations coefficients (Cor) and partial correlation coefficients (Pcor) of critical pairs in normal and tumor samples of LUAD. Figure S5: Simple correlations coefficients (Cor) and partial correlation coefficients (Pcor) of critical pairs in tumor samples of LIHC. Figure S6: Simple correlations coefficients (Pearson correlation coefficient) and partial correlation coefficients (given CNAs effects) of critical pairs in cancer samples of LUAD. Table S1: Sample sizes for each cancer type. Table S2. Sample clinical and grouping information for each cancer type. Table S3. List of DEMs for each cancer type. Table S4. List of DEGs for each cancer type. Table S5. Frequency of DEMs and DEGs in 11 cancer types. Table S6. List of critical miRNA-target gene pairs for each cancer type. Table S7: Interactional references and gene functional references for some critical miRNA-target pairs. Table S8. Frequency of critical miRNA-target pairs in 11 cancer types. Table S9. List of the significantly GO annotation terms (p < 0.05) for the critical target genes in each cancer type. Table S10. List of the significantly KEGG pathway terms (p < 0.05) for the critical target genes in each cancer type. Table S11. Partial and simple correlation coefficients for each critical pair in normal and tumor samples of LUAD and LIHC when controlling methylation or CNAs effect. [file 1972606.f1.zip › 1972606.f1/Table S8_BMRI_2598517.xlsx]

## Sheet: Sheet2
miRNA	miRNA State	Gene	Gene State	BLCA	BRCA	HNSC	KICH	KIRC	KIRP	LIHC	LUAD	LUSC	STAD	THCA	Frequency
miR-183	up	NEGR1	down	0.635528	0.501627		0.314222		0.176336				0.504069	0.247191	6
miR-210	up	SCN7A	down	0.164057	-0.36709	0.196977		0.312041	0.487071				1.46e-05		6
miR-21	up	EPM2A	down		0.341707	0.650675		0.23328	0.299847	0.031112			0.485717		6
miR-21	up	LIFR	down	0.424483	0.473062	0.616611			0.324785					-0.0481912	5
miR-182	up	PCOLCE2	down	0.508899	0.304451		0.679291		0.421044				0.301281		5
miR-21	up	FAXDC2	down		0.567634	0.736185				0.0368769			0.465194	-0.315985	5
miR-21	up	SOX5	down	0.163502	0.659607								0.243396	0.429292	4
miR-183	up	AKAP12	down	0.397079	0.428621								0.765746	0.0497358	4
miR-195	down	CCNE1	up	0.163069	-0.134876	0.0794239					0.252008				4
miR-96	up	RECK	down	0.63281	0.227717	0.454729							0.194462		4
miR-182	up	CTNNA3	down	0.813427					0.596191	0.571058			0.491174		4
miR-182	up	PITPNM3	down	-0.0197903			0.855335		0.841302				0.889087		4
miR-182	up	PPM1L	down	0.554691	0.419691				0.35979				0.907987		4
miR-21	up	TGFBR3	down		0.372539	0.33421							0.588848	0.123933	4
miR-21	up	PPM1L	down		0.315802	0.596945			0.131882				0.4447		4
miR-21	up	DMD	down		0.225799	0.606624				0.0140284			0.431991		4
miR-21	up	KLF9	down		0.546821	0.537392			0.084485				0.240813		4
miR-30a	down	DTL	up			0.657447					0.0541579	0.0076242	0.29637		4
miR-21	up	LONRF2	down			0.600062		0.468047	0.308969				0.509771		4
miR-30a	down	CELSR3	up			0.37557					0.214941	0.334332	0.743056		4
miR-429	up	ZEB2	down	0.68822	0.5478							-0.13356			3
miR-21	up	SPRY2	down	0.248413	0.358432	0.480357									3
miR-200b	up	ZEB2	down	0.551822	0.43067							-0.0625048			3
miR-96	up	MITF	down	0.476563	0.191589	0.229239									3
miR-21	up	BTG2	down	0.192624				0.434208					-0.0295137		3
miR-200a	up	ZEB1	down	0.823983	0.534644								0.276181		3
miR-192	up	PDE2A	down	0.402698	0.245935							0.221768			3
miR-141	up	ZFPM2	down	0.199259	0.340776							0.120493			3
miR-200a	up	ZFPM2	down	0.175841	0.523326								0.409717		3
miR-200c	up	ZFPM2	down	0.137557	0.260692							0.0893996			3
miR-429	up	ZFPM2	down	0.209282	0.557252							-0.0457339			3
miR-182	up	RECK	down	0.714005	0.42581								0.293687		3
miR-145	down	MMP1	up	0.601411	0.441586								0.485185		3
miR-21	up	APOLD1	down	0.183081	0.167274	0.35461									3
miR-378a	down	CHTF18	up	0.972024	0.487768	0.365291									3
miR-183	up	FAM110B	down	0.821918		0.467288							0.515844		3
miR-182	up	PRKAA2	down	0.634145					0.270565				0.553395		3
miR-100	down	RRM2	up	0.136854								-0.0472012	0.186419		3
miR-183	up	ZEB1	down	0.563727	0.429055								0.472221		3
miR-96	up	ZEB1	down	0.5253	0.16785								0.406304		3
miR-210	up	HIF3A	down	0.342237		0.343404							0.0644998		3
miR-96	up	CLIP4	down	0.633875	0.128832								0.414391		3
let-7c	down	EN2	up	0.208358	0.306098	0.215712									3
miR-96	up	ALPK3	down	0.732944	0.394489	0.442084									3
miR-183	up	LAMA2	down	0.672477	0.319343									0.213083	3
miR-378a	down	BBC3	up	0.428107	0.161796								0.623745		3
miR-145	down	BUB1	up	0.291374	0.241811								0.277678		3
miR-490	down	RAD51	up	0.152046								0.335687	0.53709		3
miR-96	up	SYNM	down	0.512596		0.250065							0.359801		3
miR-183	up	KY	down	0.592897		0.650757							0.533552		3
miR-31	up	SYDE2	down	0.863251		-0.067109			0.553483						3
miR-145	down	LMNB2	up	0.259369	0.170763								0.372512		3
miR-224	up	LONRF2	down	0.503675		0.411926		0.445395							3
miR-378a	down	GALNT6	up	0.874003	0.703255	0.3081									3
miR-181b-2	up	FAM124A	down	0.610693	0.125419			0.051199							3
miR-31	up	PPM1L	down	0.320286		0.14802			0.109812						3
miR-183	up	C16orf45	down	0.386302		0.508788							0.269932		3
miR-141	up	MYOCD	down	1.20099	0.0543835		0.534604								3
miR-365b	down	TONSL	up	0.41895	0.507975								0.608001		3
miR-365a	down	TONSL	up	0.418537	0.506664								0.617631		3
miR-93	up	SCN7A	down	0.125926		0.367435			0.453881						3
miR-145	down	CCNA2	up	0.257562	0.107246								0.38409		3
miR-21	up	RECK	down		0.567493	0.618784							0.378799		3
miR-182	up	FOXO1	down		0.308543				0.849862	0.476618					3
miR-155	up	LPL	down		0.27313			0.183824	0.544033						3
miR-183	up	FOXO1	down		0.269122				0.868205	0.419819					3
miR-155	up	PCDH9	down		0.296104			0.185372	0.703714						3
miR-155	up	CAT	down		0.25518			-0.0114413	-0.0691432						3
miR-183	up	GAS1	down		0.34539				0.111873				0.446056		3
miR-21	up	COBLL1	down		0.629914			0.387496		0.203799					3
miR-21	up	FERMT2	down		0.682601					0.288433			0.445149		3
miR-21	up	SATB1	down		0.0899463	0.692763							0.439416		3
miR-96	up	SOX5	down		0.321021								0.249008	0.562242	3
miR-155	up	THRB	down		0.156885			0.234862	0.406247						3
miR-182	up	DUSP1	down		0.303776					0.301034			0.107351		3
miR-96	up	ABCA6	down		0.249079	0.322001								-0.0044857	3
miR-204	down	TREM1	up		-0.042409	0.150824		0.154836							3
miR-141	up	SIRPA	down		0.0926723		0.58584				0.0350309				3
miR-200a	up	SOX17	down		0.388488							0.0705761	0.138382		3
miR-21	up	CFL2	down		0.35465	0.572058							0.553041		3
miR-31	up	CXCL12	down			0.359121			0.128328		0.724492				3
miR-30a	down	PTGFRN	up			0.423776					0.274999	0.300366			3
miR-30a	down	TUBB3	up			0.486149					0.253104	0.232159			3
miR-30a	down	CDC20	up			0.912019						0.158638	0.294907		3
miR-30a	down	TPBG	up			0.663833					0.183037	0.33633			3
miR-21	up	ZBTB47	down			0.767764					0.984301		0.641013		3
miR-21	up	ACAT1	down			0.393288		-0.112125		0.0369619					3
miR-21	up	PBX1	down			0.728281		-0.102086					0.345868		3
miR-195	down	CEP55	up			0.36176					0.1745	0.164292			3
miR-379	down	HIST1H3H	up			0.651136	0.209157		0.879984						3
miR-411	down	HIST1H3H	up			0.551344	0.389763		0.853821						3
miR-30a	down	KPNA2	up			0.768009						-0.0517028	0.171606		3
miR-30a	down	CCNF	up			0.781611						0.247934	0.214773		3
miR-30a	down	CBX2	up			0.415312					0.361653	0.25731			3
miR-130b	up	PLCL1	down			0.210439					0.479489		0.539195		3
miR-210	up	MRO	down			0.248598		0.741149	0.401953						3
miR-30a	down	MYBL2	up			0.571962						0.244506	0.476122		3
miR-206	down	MET	up				0.24311	0.486907	0.687319						3
miR-96	up	PITPNM3	down				0.844415		0.670897				0.842894		3
miR-1251	down	KIF2C	up				0.658102	0.0723691	0.542265						3
miR-885	up	XPNPEP2	down				0.418747	0.755119	1.00814						3
miR-675	down	KCNQ5	up				0.641451	0.643941	0.940036						3
miR-508	down	HIST1H2AG	up				1.01586	0.273102	0.6192						3
miR-30b	down	CLSPN	up					0.000611	0.342575			0.26086			3
miR-30b	down	RAD51	up					0.213687	0.132674			0.195046			3
miR-30b	down	ESCO2	up					0.0069743	0.0683438			0.272963			3
miR-93	up	FAM46C	down						0.335716	-0.0251508			0.555522		3
miR-195	down	CLSPN	up								0.126878	0.097323	-0.415593		3
miR-141	up	ZEB2	down	0.598059	0.268071										2
miR-141	up	ZEB1	down	0.783516	0.294559										2
miR-100	down	PLK1	up	0.284246									0.303597		2
miR-145	down	MUC1	up	1.02486	0.435475										2
miR-224	up	RAB9B	down	0.719496		0.448963									2
miR-200a	up	ZEB2	down	0.545206	0.564703										2
miR-200c	up	ZEB2	down	0.540254	0.245481										2
miR-429	up	ZEB1	down	0.921971	0.513777										2
miR-182	up	MITF	down	0.516611	0.31374										2
miR-200c	up	ZEB1	down	0.758853	0.308347										2
miR-200b	up	ZEB1	down	0.804075	0.452874										2
miR-210	up	NCAM1	down	0.251787									-0.104053		2
miR-27b	down	MMP13	up	1.01513									0.482402		2
miR-23b	down	PLAU	up	0.674897									0.365687		2
miR-200b	up	WASF3	down	0.461585	0.656529										2
miR-429	up	WASF3	down	0.482335	0.66444										2
miR-200a	up	WASF3	down	0.472066	0.576368										2
miR-200b	up	ZFPM2	down	0.171434	0.41934										2
miR-17	up	TNFSF12	down	0.351535									-0.193818		2
miR-145	down	KRT7	up	0.431587									0.479474		2
miR-31	up	DMD	down	0.531749		0.706696									2
miR-143	down	FSCN1	up	0.237283		0.31213									2
miR-203a	up	ZEB2	down	0.784784	0.636314										2
miR-200c	up	FBLN5	down	0.977986	0.326594										2
miR-200c	up	KLF9	down	0.472821	0.21068										2
miR-205	up	LRRK2	down	0.857566						0.458433					2
miR-429	up	RASSF2	down	0.908875							0.485984				2
miR-429	up	KLF11	down	0.402024	0.525076										2
miR-335	up	DIRAS1	down	0.386219									0.483255		2
miR-200a	up	RASSF2	down	0.871011							0.289066				2
miR-200a	up	KLF11	down	0.334046	0.51266										2
miR-200c	up	KLF11	down	0.355467	0.440225										2
miR-142	up	NAP1L2	down	0.554297				0.737552							2
miR-142	up	TPSG1	down	0.490257								0.165688			2
miR-141	up	RASSF2	down	0.712372							0.286432				2
miR-141	up	KLF11	down	0.266307	0.552553										2
miR-200b	up	KLF11	down	0.319652	0.503991										2
miR-183	up	REV3L	down	0.696593	0.263679										2
miR-192	up	DNAJB4	down	0.357078	0.0881298										2
miR-192	up	MCAM	down	0.878671	0.0249316										2
miR-192	up	RNASE4	down	0.447574	0.361115										2
miR-96	up	CDON	down	0.57643									0.474376		2
miR-21	up	UTRN	down	0.724994	0.468368										2
miR-18a	up	DAAM2	down	0.243564									0.675626		2
miR-93	up	C1orf21	down	0.0786334							0.209665				2
miR-27b	down	SLC5A6	up	0.446389									0.75455		2
miR-23b	down	CATSPERB	up	1.12556									0.30721		2
miR-23b	down	CDCA8	up	-0.0062839									0.367301		2
miR-23b	down	CCNB2	up	0.253532									0.454033		2
miR-23b	down	RAD51	up	0.180304									0.362752		2
miR-23b	down	CDC20	up	0.223567									0.409267		2
miR-183	up	ITPKB	down	0.514355									0.658979		2
miR-183	up	SH3D19	down	0.454077	0.482617										2
miR-182	up	TTC28	down	1.31601	0.459283										2
miR-100	down	KPNA2	up	0.161765									0.125701		2
miR-96	up	KLHL15	down	0.682016					0.641341						2
miR-18a	up	BVES	down	0.50855									0.422345		2
miR-17	up	PDLIM5	down	0.0219091						0.134816					2
let-7c	down	CCNF	up	0.113079									0.135052		2
miR-203a	up	LIFR	down	0.063713	-0.0457691										2
miR-203a	up	CAV1	down	0.833176	0.663051										2
miR-203a	up	ZEB1	down	0.907174	0.592704										2
miR-203a	up	SMAD9	down	0.481	0.25723										2
miR-145	down	SOX9	up	0.423862									0.56162		2
miR-200c	up	CFL2	down	0.255016	0.576427										2
miR-210	up	SH3BGRL	down	0.243278									0.0704395		2
miR-195	down	WNT7A	up	0.444791		0.27849									2
miR-200b	up	FERMT2	down	0.448929	0.545431										2
miR-192	up	CAV1	down	0.303267	0.0932184										2
miR-181b-2	up	LONRF2	down	0.645074				0.145246							2
miR-195	down	HMGA1	up	0.362587							-0.0092812				2
miR-195	down	PSAT1	up	0.363314								0.175851			2
miR-183	up	FBXO32	down	0.471874									0.484216		2
miR-33a	up	TGFBR2	down	0.591754	-0.0079488										2
miR-195	down	RAB3IP	up	0.376075									-0.0168486		2
miR-224	up	SYNM	down	1.01166		0.302439									2
miR-182	up	SMARCD3	down	0.827155									0.481102		2
miR-182	up	TCEAL7	down	0.695967									0.348912		2
miR-29a	down	COL10A1	up	0.893981								0.441124			2
miR-204	down	SIX1	up	0.790432				0.197631							2
let-7c	down	ARID3A	up	0.344568									0.630538		2
miR-142	up	STX2	down	0.585848								0.384443			2
miR-944	up	NR3C2	down	0.202598		0.292311									2
miR-192	up	FGF7	down	0.446057	0.187062										2
miR-651	up	UNC5C	down	0.375499					0.496512						2
miR-135b	up	TTLL7	down	0.622516									0.441771		2
miR-18a	up	PCDH9	down	0.729973									0.670516		2
miR-139	down	ALOX15	up	0.623348									0.275968		2
miR-455	up	C3	down	0.389261		0.0431391									2
miR-139	down	SLC5A6	up	0.592476									0.612505		2
miR-145	down	PSAT1	up	0.33434									0.459092		2
miR-31	up	PDE4D	down	0.812859								0.599539			2
miR-210	up	MITF	down	0.180576		0.0196948									2
miR-183	up	DNAJB4	down	0.256032	0.17479										2
miR-203a	up	MXRA7	down	0.214244	0.801913										2
miR-455	up	SSBP2	down	0.341522		0.109545									2
miR-139	down	LRRC45	up	0.416368	0.243521										2
miR-139	down	SYT7	up	0.302731	0.684696										2
miR-4728	up	PPM1L	down	0.363022	0.448908										2
miR-378c	down	KCNJ6	up	0.233092	0.130233										2
miR-96	up	SSC5D	down	0.602218									0.287388		2
let-7c	down	SLC5A6	up	0.459679									0.76032		2
miR-195	down	CDCA4	up	0.184491		0.484745									2
miR-31	up	KLHL15	down	0.684468					0.0751923						2
miR-4728	up	FERMT2	down	0.261499	0.385058										2
miR-210	up	SERTM1	down	0.238256				0.408598							2
miR-182	up	SYNM	down	0.621728									0.329204		2
miR-490	down	ZNF695	up	0.253031								0.637081			2
miR-183	up	FNBP1	down	0.657696									0.457819		2
miR-203a	up	FOXN3	down	0.73961	0.826964										2
miR-135b	up	DNAJB4	down	0.491223	0.650931										2
miR-203a	up	DLC1	down	0.754198	0.412301										2
miR-203b	up	CNKSR2	down	0.879413	0.448134										2
miR-141	up	EPHA7	down	0.360427			0.0477183								2
miR-200a	up	EPHA7	down	0.520911									0.374416		2
miR-203a	up	KIAA0408	down	0.49143	0.489352										2
miR-17	up	TMEM100	down	0.0743875									-0.0150376		2
miR-182	up	SYDE2	down	0.963149					0.35506						2
miR-365a	down	SIX4	up	0.781716	0.399574										2
miR-203a	up	PRICKLE2	down	1.03971	0.473959										2
miR-19a	up	FYCO1	down	-0.132258									0.156225		2
miR-23b	down	LMNB1	up	0.161104									0.202674		2
miR-1301	up	CPEB3	down	0.205305						0.0619436					2
miR-203a	up	CELF2	down	0.723022	0.557021										2
miR-143	down	OAS3	up	0.882441									0.281529		2
miR-4728	up	RFTN2	down	0.802737	0.297903										2
miR-616	up	NRXN1	down	0.711161				0.0745274							2
miR-708	up	ASXL3	down	0.554871									0.800752		2
miR-143	down	CHDH	up	0.432314									0.565023		2
miR-23b	down	PRR11	up	0.369493									0.546473		2
miR-210	up	XKR4	down	0.55435				0.384582							2
miR-145	down	RAB3IP	up	0.626152									0.467054		2
miR-4728	up	GLP2R	down	0.422997	0.0973374										2
miR-378a	down	HCAR1	up	0.99306									0.104705		2
miR-143	down	CENPM	up	0.060391	0.286973										2
miR-4728	up	DSEL	down	0.51964	0.0976111										2
miR-18a	up	FAXC	down	0.709187									0.403155		2
miR-4728	up	CRTAP	down	0.496944	0.276622										2
miR-141	up	COL19A1	down	0.300219			0.802355								2
miR-200a	up	ANGPTL7	down	0.666187									0.293139		2
miR-141	up	ANGPTL7	down	0.861707			0.46689								2
miR-378a	down	FLVCR1	up	0.612285	0.470409										2
miR-141	up	WASF3	down	0.337377	0.788892										2
miR-23b	down	TIMELESS	up	0.444644									0.400151		2
let-7c	down	RAB3IP	up	0.69301									0.523747		2
miR-365b	down	RAB11FIP4	up	0.593648	0.783641										2
miR-365a	down	RAB11FIP4	up	0.594717	0.77343										2
miR-200a	up	PRKAA2	down	0.321233									0.665613		2
miR-143	down	C2orf15	up	0.722493									0.507298		2
miR-4728	up	TMTC1	down	0.584813	0.262599										2
miR-642a	up	PTGIS	down	0.122456								0.790472			2
miR-4728	up	NPR1	down	0.649247	0.164708										2
miR-23b	down	CABP4	up	0.881691									0.942255		2
let-7c	down	ITGA3	up	0.213401		0.164003									2
let-7c	down	OLR1	up	0.383064									0.789578		2
miR-27b	down	OLR1	up	0.720402									0.152383		2
miR-195	down	AGMAT	up	0.561022								0.569908			2
miR-135b	up	MPL	down	0.30877	0.702053										2
miR-224	up	MITF	down	1.23985		0.50101									2
miR-200a	up	LPP	down	1.15937									0.86529		2
miR-143	down	DNAJB13	up	0.655007									0.0137343		2
miR-135b	up	AMOTL2	down	1.12994	0.542929										2
miR-18a	up	ATP2B4	down	0.23915									0.359117		2
miR-181b-2	up	FSTL1	down	0.40286	0.188092										2
miR-183	up	KCTD12	down	0.259204	0.323928										2
miR-4728	up	ZCCHC24	down	0.650594	0.187766										2
miR-1301	up	MYLK	down	0.0733106	0.0652649										2
miR-23b	down	CDT1	up	0.111364									0.398903		2
miR-141	up	DOK6	down	0.909968			0.878911								2
miR-1304	up	TNS1	down	0.366831									0.20686		2
miR-17	up	KLHL15	down	0.728516						-0.08551					2
miR-451a	down	MIF	up		0.047381						0.466814				2
miR-96	up	FOXO1	down		0.100338				0.834464						2
miR-21	up	FMOD	down		0.594662									-0.0670858	2
miR-140	down	MMP13	up		0.117169	0.579534									2
miR-18a	up	CSRNP3	down		-0.0214174	0.333751									2
miR-21	up	MEF2C	down		0.390108	0.529752									2
miR-204	down	PLAUR	up		-0.0036608			0.0266112							2
miR-21	up	PPARA	down		0.371332			-0.0129889							2
miR-21	up	SOD3	down		0.201337								0.507482		2
miR-21	up	TCF21	down		0.57484			0.0582473							2
miR-503	up	FGF2	down		0.471594								0.462623		2
miR-335	down	SYNGR3	up		0.383715		-0.0096086								2
miR-335	down	DHCR7	up		0.0728131		0.17311								2
miR-335	down	CHAC1	up		0.0620933		0.982992								2
miR-375	up	CFL2	down		0.401143						0.128485				2
miR-155	up	GABARAPL1	down		0.359073			-0.0774508							2
miR-145	down	GOLM1	up		0.452524		0.268246								2
miR-215	down	ATAD2	up		0.23945		0.594955								2
miR-215	down	DTL	up		0.530487		0.613073								2
miR-215	down	NCAPH	up		0.418817		0.724146								2
miR-215	down	BUB1B	up		0.591718		0.519665								2
miR-215	down	TRIB3	up		0.652185		0.682659								2
miR-183	up	TXNIP	down		0.386183								0.432865		2
miR-192	up	PARM1	down		0.367984							0.343469			2
miR-21	up	DDR2	down		0.461261								0.629583		2
miR-21	up	ATP2B4	down		0.674484								0.605639		2
miR-21	up	PRICKLE2	down		0.84932								0.644386		2
miR-21	up	LIMCH1	down		0.567985	0.77031									2
miR-378a	down	HIST1H2BD	up		0.128624	0.322175									2
miR-193a	down	AURKA	up		0.346625								0.95212		2
miR-10b	down	UHRF1	up		-0.0608157				0.815534						2
miR-155	up	KLF9	down		0.142142				0.247541						2
miR-10b	down	BUB1	up		-0.10151				0.902191						2
miR-365a	down	CDC25A	up		0.13637								0.68952		2
miR-200a	up	DLC1	down		0.384133								0.317954		2
miR-182	up	CHL1	down		0.473917								0.890089		2
miR-497	down	CCNE1	up		0.0045609	0.237609									2
miR-18a	up	ID4	down		0.391055								0.398053		2
miR-195	down	EN2	up		0.1275				0.431316						2
miR-143	down	GINS4	up		0.34908								0.0825392		2
miR-135b	up	TXNIP	down		0.459583								1.11222		2
miR-5683	down	POLQ	up		0.0830298	0.38267									2
miR-96	up	TMEM170B	down		0.390817	0.352815									2
miR-140	down	FEN1	up		0.0425612							-0.199528			2
miR-18a	up	SYNM	down		0.516205								0.493389		2
miR-195	down	CBX2	up		-0.111938						0.106429				2
miR-5683	down	CCNB1	up		0.0831133	0.249276									2
miR-18a	up	PTCHD1	down		0.676283								0.471681		2
miR-365b	down	ZWINT	up		0.265582								0.860144		2
miR-365a	down	ZWINT	up		0.270144								0.871315		2
miR-183	up	KLHL31	down		0.326761	0.577578									2
miR-140	down	CDCA8	up		0.126472							-0.121645			2
miR-140	down	TTLL12	up		0.302324							0.213726			2
miR-18a	up	SMYD1	down		0.396442								0.22438		2
miR-140	down	RACGAP1	up		0.0792436							0.0089528			2
miR-187	up	FOS	down		0.344738	0.446646									2
miR-4746	up	SCN2B	down		-0.0616955	0.352356									2
miR-944	down	GPR158	up		0.40426								1.01986		2
miR-503	up	TMEM100	down		0.551728							0.417133			2
miR-130b	up	RIMS3	down		0.436587								0.250065		2
miR-592	up	AKAP12	down		0.0670395								0.325959		2
miR-93	up	KCNMB1	down		0.0974907	0.310663									2
miR-18a	up	KY	down		0.255232								0.497434		2
miR-503	up	LYVE1	down		0.578964								0.510697		2
miR-365b	down	OIP5	up		0.275136								0.728119		2
miR-365a	down	OIP5	up		0.281253								0.728569		2
miR-193a	down	BUB1	up		0.261774								0.894313		2
miR-503	up	RECK	down		0.714661								0.624723		2
miR-21	up	GAS1	down		0.512859								0.499513		2
miR-19a	up	CFL2	down		0.345604								0.142369		2
miR-143	down	DEPDC1B	up		0.121779								0.276276		2
miR-183	up	TMEM170B	down		0.386286	0.495779									2
miR-511	down	SYT9	up		-0.11135							0.21809			2
miR-141	up	TMEM132C	down		0.330995							0.252679			2
miR-10b	down	MELK	up		-0.157541				0.805473						2
miR-342	up	PLXNA4	down		0.426174			0.817531							2
miR-203a	up	MCTP1	down		0.356196							0.572389			2
miR-183	up	KCNT2	down		0.104268	0.276704									2
miR-139	down	CHEK1	up		0.0176965								-0.126622		2
miR-378a	down	C20orf144	up		0.4746	0.517087									2
miR-342	up	PLA2G4A	down		0.137871			0.557102							2
miR-4728	up	SLC10A6	down		0.136639								0.570774		2
miR-378a	down	WNT7B	up		0.486364	0.506614									2
miR-592	up	EMCN	down		0.170933	0.0765763									2
miR-378a	down	ARHGEF39	up		0.44343	0.363436									2
miR-503	up	GLP2R	down		0.45645							0.213394			2
miR-891a	down	RAD51	up		0.404264				0.953315						2
miR-18a	up	STAC2	down		0.677003	0.271193									2
miR-93	up	STAC2	down		0.257496	0.505627									2
miR-139	down	KCNQ5	up		0.371117				0.437818						2
miR-3127	up	TYRO3	down		0.282665				0.869824						2
miR-3127	up	POU6F1	down		-0.0792896								0.127099		2
miR-200b	up	SOX17	down		0.32136							0.132258			2
miR-30a	down	CDK6	up			0.584641							0.616006		2
miR-21	up	TPM1	down			0.646943							0.613467		2
miR-204	down	SERPINE1	up			0.0470896		-0.176386							2
miR-19a	up	KIT	down			0.114936							0.345279		2
miR-29c	down	COL7A1	up			0.24114							0.204094		2
miR-375	down	NETO2	up			0.153105						0.513771			2
miR-130b	up	CRY2	down			0.0204388							0.128211		2
miR-130b	up	FYCO1	down			0.0449385							0.241199		2
miR-93	up	CRY2	down			0.339488						-0.0534283			2
miR-93	up	MAN1C1	down			0.318104			-0.20093						2
miR-30a	down	FSCN1	up			0.525673						0.253377			2
miR-30a	down	SERPINE2	up			0.518241						0.190634			2
miR-21	up	BOC	down			0.532797							0.247263		2
miR-21	up	CPEB3	down			0.852987		0.248493							2
miR-21	up	TMEM56	down			0.258924				0.186411					2
miR-21	up	GPD1L	down			0.717765		0.065923							2
miR-93	up	ACSL1	down			0.525139				0.068208					2
miR-18a	up	NBEA	down			0.322032							0.490677		2
miR-195	down	BIRC5	up			0.165646						-0.0515414			2
miR-26a-1	down	BIRC5	up			0.105691						-0.0482486			2
miR-26a-2	down	BIRC5	up			0.108067						-0.0352296			2
miR-93	up	ACADSB	down			0.538882			0.716867						2
miR-19a	up	ITPR1	down			0.260252							0.421916		2
miR-196b	up	PBX1	down			0.66283							0.479418		2
miR-29c	down	COL5A2	up			0.113643						0.543875			2
miR-29c	down	SERPINH1	up			-0.0215388						0.299736			2
miR-21	up	NFIA	down			0.374416							0.260682		2
miR-183	up	SMYD1	down			0.50538							0.591513		2
miR-224	up	NDNF	down			0.558985		0.496747							2
miR-100	down	EMX1	up			0.576623							0.382923		2
miR-6510	down	FGFR4	up			0.191654							0.274951		2
miR-30a	down	SLC16A1	up			0.451292						0.277876			2
miR-21	up	C15orf52	down			0.473303							0.667878		2
miR-224	up	PCSK2	down			0.411163		0.440459							2
miR-139	down	LIMD2	up			0.396297			0.269871						2
miR-190a	down	CTLA4	up			0.38476			0.471565						2
miR-19a	up	SATB1	down			0.0367643							0.275679		2
miR-195	down	CDK1	up			0.145607						-0.0882669			2
miR-224	up	SLC7A14	down			0.236441		0.250024							2
miR-190a	down	LRP8	up			0.38014						0.400032			2
miR-224	up	LDHD	down			0.611288		0.422171							2
miR-210	up	LONRF2	down			0.314649							0.267551		2
miR-29c	down	FJX1	up			0.0539879						0.170062			2
miR-93	up	TMEM200C	down			0.792097			0.327446						2
miR-196b	up	TGFBR3	down			0.467845							0.0741448		2
miR-130b	up	ASB16	down			0.354336							0.692765		2
miR-196b	up	PRUNE2	down			0.201599							0.367761		2
miR-130b	up	CFL2	down			0.264496							0.478168		2
miR-130b	up	KCNB1	down			0.262864							0.342983		2
miR-503	up	GREM2	down			0.462801							0.139206		2
miR-130b	up	TNS1	down			0.363691							0.397966		2
miR-130b	up	MYOCD	down			0.469757							0.483626		2
miR-301b	up	MYH11	down			0.622585							0.389948		2
miR-301a	up	MYH11	down			0.225283						-0.0508787			2
miR-30a	down	ATP8B3	up			0.454196					0.319908				2
miR-378a	down	ONECUT1	up			0.618465							0.520376		2
miR-130b	up	C16orf45	down			0.472796							0.303025		2
miR-4746	up	INMT	down			0.358087							0.379774		2
miR-3934	up	BHMT2	down			0.297624			-0.0700542						2
miR-139	down	PTGFRN	up			0.804617			0.0394673						2
miR-18a	up	CRY2	down			0.193168							0.346614		2
miR-130b	up	C3orf18	down			0.496508							0.175209		2
miR-18a	up	FAM107A	down			-0.020375							0.719783		2
miR-204	down	COL5A3	up				0.302431						0.31564		2
miR-335	down	CPT1B	up				-0.0075666	0.199994							2
miR-183	up	CR1	down				0.895496		0.361769						2
miR-183	up	ITGA8	down				0.598973		0.0881264						2
miR-206	down	G6PD	up				0.487457		0.650282						2
miR-200c	up	OSR1	down				0.474314					0.426583			2
miR-182	up	KCNJ10	down				0.568254		0.277176						2
miR-183	up	GABRB1	down				0.511239		0.400662						2
miR-299	down	HIST1H3H	up				0.21281		0.450178						2
miR-96	up	SULT1B1	down				0.310939		0.429996						2
miR-885	up	SULT1B1	down				0.410334		0.700452						2
miR-200c	up	TMEM119	down				0.349995					-0.0257061			2
miR-96	up	PODXL	down				0.151587		0.796945						2
miR-182	up	PODXL	down				0.348447		0.97548						2
miR-483	down	RAB3B	up				0.450957		0.573825						2
miR-182	up	GABRB1	down				0.43941		0.353289						2
miR-96	up	GABRB1	down				0.378961		0.250686						2
miR-204	down	2018-03-01	up				0.566795	0.554093							2
miR-651	up	CHRDL1	down				0.150254		0.0918331						2
miR-204	down	KNTC1	up				-0.138953	-0.0377943							2
miR-3653	up	EMP2	down				0.328475					0.365628			2
miR-96	up	ACY1	down				0.816078		1.07445						2
miR-183	up	ACY1	down				1.05746		1.08798						2
miR-221	up	C11orf54	down				0.835241			0.135221					2
miR-183	up	A1CF	down				0.523143		0.434026						2
miR-21	up	SLC16A10	down					0.319159	-0.209068						2
miR-155	up	ERMP1	down					0.0467755	0.264196						2
miR-30b	down	CCNE2	up					0.149496				0.250421			2
miR-155	up	UGT8	down					0.387145	0.25785						2
miR-155	up	CAB39L	down					0.0696275	0.381012						2
miR-21	up	TRIM2	down					0.217418	0.436614						2
miR-21	up	SLC5A3	down					0.715484	0.525152						2
miR-21	up	WNK3	down					0.338512	0.050779						2
miR-188	down	CDC20	up					0.403854	0.361144						2
miR-30b	down	RUNX2	up					0.0656908				0.134042			2
let-7e	down	MMP9	up					0.211909			0.365316				2
miR-3065	down	LMNB1	up					0.241447				0.236342			2
miR-188	down	CDCA8	up					0.415949	0.112876						2
let-7e	down	AURKB	up					0.0060071			0.509734				2
miR-155	up	ZNF98	down					-0.029517	0.582195						2
miR-30b	down	SIGLEC14	up					0.0326749	0.23743						2
miR-149	down	HAVCR2	up					0.334162					0.591337		2
miR-146b	up	RHOBTB3	down					0.709938	0.416143						2
miR-30b	down	KLHDC8A	up					0.411613				0.206651			2
miR-30b	down	COL5A1	up					0.286171				0.270995			2
miR-452	up	PANK1	down					0.613654		0.307067					2
miR-363	down	GRIN2D	up					0.32988					0.0317536		2
miR-216a	down	CHEK2	up					0.290533	0.338743						2
miR-5586	up	HMX2	down					0.118727	0.707434						2
miR-362	down	CD180	up					0.391803	0.887768						2
miR-362	down	SIGLEC10	up					0.330314	0.615633						2
miR-188	down	HLA-DOB	up					0.502319	0.262582						2
miR-362	down	LILRB2	up					0.354129	0.65285						2
miR-203a	down	C15orf48	up					0.366711	0.470187						2
miR-203a	down	SPATA18	up					0.832471	0.577306						2
miR-362	down	CLEC12A	up					0.503007	0.588888						2
miR-30b	down	QRFPR	up					-0.0031621	0.533323						2
miR-362	down	EVI2A	up					0.424387	0.685585						2
miR-362	down	SOD2	up					0.402051	0.738007						2
miR-362	down	LILRB1	up					0.379174	0.701186						2
miR-362	down	ARL4C	up					0.265002	0.263148						2
miR-362	down	FASLG	up					0.371277	0.309357						2
miR-216b	down	SLFN13	up					0.440685	0.568511						2
miR-362	down	SLC7A11	up					0.383432	0.204051						2
miR-203a	down	CCR5	up					0.198393	0.670394						2
miR-362	down	RAP2B	up					0.270941	0.2618						2
miR-362	down	SLC1A4	up					0.523031	0.579143						2
miR-129-2	down	KLRD1	up					0.328257	0.670074						2
miR-129-1	down	KLRD1	up					0.427502	0.702976						2
miR-1251	down	PYCARD	up					0.277929	0.206628						2
miR-514b	down	TMEM92	up					0.404791	0.408983						2
miR-141	down	SIRPA	up					0.271734	0.579201						2
miR-362	down	ABCA12	up					0.319734	0.41665						2
miR-216b	down	LHFPL2	up					0.292985	0.474941						2
miR-4772	up	GSTM3	down					0.287781	0.627049						2
miR-4772	up	GP2	down					0.321946	0.797919						2
miR-1251	down	ALDOA	up					0.670838	0.504471						2
miR-203a	down	CREB5	up					0.357922	0.286657						2
miR-203b	down	CORO1C	up					0.252214	0.537378						2
miR-155	up	ATP1A1	down					0.169006	0.22657						2
miR-584	up	CCBE1	down					0.320555	0.461904						2
miR-30b	down	LHFPL2	up					0.469252	0.41361						2
miR-126	down	MMP7	up						0.097757			0.522208			2
miR-21	up	KLHL15	down						0.0720029	0.172434					2
miR-30b	down	RRM2	up						-0.006325			0.184089			2
miR-34c	up	FOXO1	down						0.213178	0.157005					2
miR-93	up	TM4SF5	down						0.899049				0.20832		2
miR-183	up	DBT	down						0.878801	0.380313					2
miR-93	up	NUGGC	down						0.882779				0.363276		2
miR-93	up	KLHL15	down						-0.118744	0.0745187					2
miR-183	up	EGR1	down							0.45377			0.580083		2
miR-221	up	ASXL3	down							0.225507				0.234728	2
miR-17	up	FAM46C	down							0.0031624			0.396794		2
miR-20a	up	FAM46C	down							0.0062138			0.478098		2
miR-139	down	TMC7	up							0.0259797			0.504424		2
miR-221	up	AVPR1A	down							-0.0490613				-0.0328818	2
miR-372	up	LDHD	down							0.346566			0.118667		2
miR-21	up	TIMP3	down								0.594867		0.311438		2
miR-30a	down	LMNB2	up								0.109649		0.0948449		2
miR-130b	up	ARHGEF26	down								0.327511		0.534575		2
miR-19a	up	ZBTB47	down								0.432444		0.0941628		2
miR-708	up	CNTFR	down								0.244877		0.610941		2
miR-539	up	KAT2B	down								0.447214	0.453568			2
miR-493	up	AGTPBP1	down								0.522704	0.597541			2
miR-493	up	LIFR	down								0.323525	0.535049			2
miR-490	down	FADS6	up								0.595018	0.274227			2
miR-409	up	SECISBP2L	down								0.365731	0.240864			2
miR-493	up	C12orf49	down								0.578934	0.453355			2
miR-134	up	KIAA1456	down								0.58343	0.434636			2
miR-30a	down	SOX12	up								0.0193234	0.288772			2
miR-30a	down	STMN1	up									0.0836542	0.144968		2
miR-30a	down	RRM2	up									0.243671	0.270438		2
miR-30a	down	PAICS	up									-0.177894	-0.0690225		2
miR-30a	down	KIF11	up									0.150651	0.134041		2
miR-30a	down	DARS2	up									0.0164465	0.485152		2
miR-30a	down	PCNA	up									-0.0635936	0.252252		2
miR-130b	up	TXNIP	down									0.132005	0.166656		2
miR-30a	down	LMNB1	up									-0.129188	0.332054		2
miR-195	down	HOXC8	up									0.295877	0.139381		2
miR-490	down	CLSPN	up									0.579504	0.443874		2
miR-195	down	HOXA10	up									0.294167	0.231045		2
miR-301b	up	HOXA5	down									0.242073	0.484616		2
miR-130b	up	TGFBR3	down									0.456913	0.447434		2
miR-301b	up	C16orf45	down									0.213152	0.255028		2
miR-19a	up	CBX7	down									0.195909	0.0431062		2
miR-146b	up	KIT	down										0.389436	-0.242197	2
miR-146b	up	KY	down										0.471113	-0.116396	2
miR-200a	up	RAB30	down	0.398486											1
miR-17	up	PKD2	down	0.235407											1
miR-23b	down	PRAP1	up	0.401601											1
miR-96	up	HTR1B	down	0.643854											1
miR-205	up	ZEB1	down	0.617093											1
miR-17	up	MEF2D	down	0.182421											1
miR-203a	up	ABL1	down	0.253721											1
miR-100	down	MMP13	up	0.869823											1
miR-145	down	FSCN1	up	0.377629											1
miR-205	up	ZEB2	down	0.343836											1
miR-33b	up	BCL2	down	0.495897											1
miR-200a	up	GATA6	down	0.670974											1
miR-584	up	ROCK1	down	0.379302											1
miR-192	up	2018-09-10	down	0.392812											1
miR-195	down	KRT7	up	0.816928											1
miR-31	up	JAZF1	down	0.532469											1
miR-31	up	ITGA5	down	0.609523											1
miR-145	down	MYRF	up	0.699197											1
miR-203a	up	EDNRA	down	1.24948											1
miR-224	up	EDNRA	down	0.447329											1
miR-17	up	CCND2	down	0.537876											1
miR-31	up	DACT3	down	0.285518											1
miR-708	up	ZEB2	down	0.532371											1
miR-708	up	MPL	down	0.525666											1
miR-133b	down	FSCN1	up	0.334128											1
miR-200c	up	NCAM1	down	0.383083											1
miR-200a	up	SRF	down	0.682281											1
miR-205	up	CTGF	down	0.0876086											1
miR-182	up	CCND2	down	0.881913											1
miR-31	up	STK40	down	0.160142											1
miR-200c	up	LPAR1	down	0.551217											1
miR-200c	up	EDNRA	down	0.768026											1
miR-590	up	PRKAR2B	down	0.160272											1
miR-429	up	PTPRD	down	-0.125076											1
miR-425	up	CELF2	down	0.617026											1
miR-335	up	KCNH2	down	0.225449											1
miR-335	up	TGFBR2	down	0.57402											1
miR-335	up	MEF2A	down	0.38499											1
miR-335	up	SYNPO2	down	0.412803											1
miR-335	up	NBEA	down	0.424316											1
miR-335	up	DMGDH	down	0.242938											1
miR-335	up	SOBP	down	0.76692											1
miR-335	up	SOX5	down	0.57227											1
miR-335	up	GALNT16	down	0.593041											1
miR-335	up	SCN1B	down	0.453112											1
miR-335	up	C20orf194	down	1.00278											1
miR-335	up	CRISPLD2	down	0.608334											1
miR-335	up	ROR2	down	0.650264											1
miR-335	up	ZCCHC24	down	0.623975											1
miR-335	up	MBD5	down	0.83823											1
miR-335	up	MAPK4	down	0.485395											1
miR-335	up	SNED1	down	0.610414											1
miR-335	up	CABP1	down	0.966267											1
miR-335	up	NECAB1	down	0.810992											1
miR-335	up	GULP1	down	0.640008											1
miR-335	up	IGDCC4	down	0.931104											1
miR-335	up	SLC2A12	down	0.535475											1
miR-335	up	LRRK2	down	0.762484											1
miR-335	up	MLXIP	down	0.658109											1
miR-335	up	FREM1	down	0.693167											1
miR-335	up	ANTXR2	down	0.485443											1
miR-335	up	OPN1SW	down	1.045											1
miR-335	up	RASSF8	down	0.954717											1
miR-335	up	RNASE4	down	0.666593											1
miR-335	up	SFRP1	down	0.366891											1
miR-335	up	ATP2B4	down	0.274305											1
miR-335	up	IL6ST	down	0.259371											1
miR-335	up	PDE5A	down	0.62191											1
miR-335	up	CPNE6	down	0.673962											1
miR-335	up	PYGM	down	0.286501											1
miR-335	up	ATP8B2	down	0.621117											1
miR-335	up	DMPK	down	0.708809											1
miR-335	up	DCHS2	down	0.83467											1
miR-335	up	TNIK	down	0.716225											1
miR-335	up	AKAP13	down	0.482204											1
miR-335	up	PGM5	down	0.2417											1
miR-335	up	PLXNA4	down	0.700037											1
miR-335	up	LONRF2	down	0.798163											1
miR-335	up	PJA2	down	0.691298											1
miR-335	up	LMOD3	down	0.645929											1
miR-335	up	PPARGC1A	down	0.215208											1
miR-335	up	PRICKLE2	down	0.901234											1
miR-335	up	PLIN4	down	0.798951											1
miR-335	up	PLSCR4	down	0.234845											1
miR-335	up	ABCA8	down	0.427679											1
miR-335	up	FAM149A	down	0.341837											1
miR-335	up	APBB1	down	0.563414											1
miR-335	up	NRP2	down	0.440478											1
miR-335	up	CD99L2	down	0.358523											1
miR-335	up	PODN	down	0.521143											1
miR-335	up	GPBAR1	down	0.790991											1
miR-335	up	CORO2B	down	0.30679											1
miR-335	up	RASA3	down	0.660511											1
miR-335	up	CHRM2	down	0.364913											1
miR-335	up	LTBP4	down	0.335521											1
miR-335	up	ITPR1	down	0.785071											1
miR-335	up	GEM	down	0.627314											1
miR-335	up	SATB1	down	0.665845											1
miR-335	up	LDLRAD4	down	0.817945											1
miR-335	up	KIAA1644	down	0.51826											1
miR-335	up	PCDHB15	down	0.314193											1
miR-335	up	P2RX1	down	0.0747399											1
miR-335	up	CSGALNACT1	down	0.621552											1
miR-335	up	POPDC2	down	0.161391											1
miR-335	up	HIC1	down	0.577754											1
miR-335	up	CLEC3B	down	0.225028											1
miR-335	up	IL33	down	0.363408											1
miR-335	up	CDC42BPA	down	0.436432											1
miR-335	up	GABARAPL1	down	0.487772											1
miR-335	up	SLC45A1	down	0.555595											1
miR-335	up	ZDHHC15	down	0.678641											1
miR-335	up	LILRB5	down	0.652225											1
miR-335	up	ATXN1	down	0.738273											1
miR-335	up	TACR2	down	0.484989											1
miR-335	up	OLFML3	down	0.474197											1
miR-335	up	UNC5C	down	0.80282											1
miR-335	up	GSG1L	down	0.630826											1
miR-335	up	MS4A2	down	0.356947											1
miR-335	up	KLHDC1	down	0.675926											1
miR-335	up	PBXIP1	down	0.175516											1
miR-335	up	MGP	down	0.326178											1
miR-335	up	TCEAL7	down	0.937234											1
miR-335	up	SMOC2	down	0.379024											1
miR-335	up	ADAMTS16	down	0.561512											1
miR-335	up	LRCH2	down	0.831342											1
miR-335	up	DIP2C	down	1.12059											1
miR-335	up	SSPN	down	0.819378											1
miR-335	up	GSN	down	0.122231											1
miR-335	up	PITPNM2	down	0.365223											1
miR-335	up	OTOGL	down	0.770231											1
miR-335	up	HECTD2	down	0.956461											1
miR-335	up	PCDHGC3	down	0.280007											1
miR-335	up	LMOD1	down	0.258254											1
miR-335	up	RECK	down	0.763193											1
miR-335	up	NOVA1	down	0.638219											1
miR-335	up	RGS22	down	0.776876											1
miR-335	up	ANK2	down	0.834525											1
miR-335	up	CCDC69	down	-0.0512054											1
miR-335	up	PDE4D	down	0.419563											1
miR-335	up	COL21A1	down	0.391619											1
miR-335	up	CLIP3	down	0.563363											1
miR-335	up	HSPG2	down	0.328092											1
miR-335	up	DOK6	down	0.639971											1
miR-335	up	FBLN2	down	0.453842											1
miR-335	up	CEND1	down	0.670253											1
miR-335	up	BCHE	down	0.623135											1
miR-335	up	GPR17	down	0.601188											1
miR-335	up	ZBTB20	down	1.1841											1
miR-335	up	ZCWPW2	down	0.665618											1
miR-335	up	PCDHGA2	down	0.651839											1
miR-335	up	EVC	down	0.837757											1
miR-335	up	ZMAT1	down	0.684234											1
miR-335	up	ZEB1	down	0.56591											1
miR-335	up	ITGA1	down	0.595416											1
miR-335	up	HIPK3	down	0.598976											1
miR-335	up	KLHL5	down	0.0434749											1
miR-335	up	PLEKHH2	down	0.53554											1
miR-335	up	FBLN5	down	0.325817											1
miR-335	up	FGF10	down	0.447049											1
miR-335	up	GATA5	down	0.15673											1
miR-335	up	ANKRD53	down	0.845205											1
miR-335	up	RPS6KA2	down	0.278421											1
miR-335	up	SCARA5	down	0.437989											1
miR-335	up	SGCD	down	0.946924											1
miR-335	up	CCND2	down	0.527531											1
miR-335	up	MROH8	down	0.391193											1
miR-335	up	CCDC141	down	0.935983											1
miR-335	up	MPDZ	down	1.08043											1
miR-335	up	FGL2	down	0.543752											1
miR-335	up	PEG3	down	0.49924											1
miR-335	up	PPFIA2	down	0.957702											1
miR-335	up	TBX5	down	0.564323											1
miR-335	up	ASB2	down	0.124581											1
miR-335	up	CEP85L	down	0.76778											1
miR-335	up	TRPC1	down	0.90576											1
miR-335	up	SDC3	down	0.324482											1
miR-335	up	FILIP1L	down	0.810407											1
miR-335	up	CLIC4	down	0.738592											1
miR-335	up	PREX2	down	0.689167											1
miR-335	up	RFX2	down	0.942963											1
miR-335	up	FHL1	down	0.410596											1
miR-335	up	LCA5	down	0.81575											1
miR-335	up	NAALAD2	down	1.01607											1
miR-335	up	PELI2	down	0.333711											1
miR-335	up	HMGCLL1	down	0.565786											1
miR-335	up	KLHL4	down	0.471123											1
miR-335	up	SLC2A13	down	0.60882											1
miR-335	up	ATP1B2	down	0.4115											1
miR-335	up	SLC2A4	down	0.272713											1
miR-335	up	TBL1X	down	0.360287											1
miR-335	up	IGSF21	down	0.581976											1
miR-335	up	TNS1	down	0.263713											1
miR-340	down	PLAG1	up	0.265211											1
miR-378a	down	DDX39A	up	0.589537											1
miR-200c	up	PTPRD	down	-0.148023											1
miR-200c	up	RASSF2	down	0.719417											1
miR-145	down	RTKN	up	0.793229											1
miR-145	down	MEST	up	0.332339											1
miR-142	up	KCND3	down	0.614696											1
miR-142	up	PCDHGA2	down	0.631538											1
miR-142	up	RGS5	down	0.57959											1
miR-142	up	KCTD12	down	0.895476											1
miR-142	up	ABCC9	down	0.462188											1
miR-142	up	CA5B	down	0.472517											1
miR-142	up	DNAJB4	down	0.76672											1
miR-142	up	CLIC4	down	0.800539											1
miR-141	up	PTPRD	down	-0.0790413											1
miR-200b	up	RASSF2	down	0.888867											1
miR-183	up	ERC1	down	0.616621											1
miR-183	up	STK33	down	0.953276											1
miR-192	up	TOR1AIP1	down	0.451383											1
miR-192	up	SGCB	down	0.434037											1
miR-192	up	MSRB3	down	0.169539											1
miR-192	up	RASSF8	down	0.691097											1
miR-192	up	PCDH7	down	0.0664926											1
miR-192	up	IL6ST	down	0.487349											1
miR-192	up	LRRFIP1	down	0.621703											1
miR-192	up	OSBPL10	down	0.389933											1
miR-192	up	CFL2	down	0.560552											1
miR-192	up	FGF2	down	0.462137											1
miR-192	up	CLIP4	down	0.427539											1
miR-192	up	ZC3H12C	down	0.711529											1
miR-192	up	PPP1R12A	down	0.53109											1
miR-192	up	SGMS2	down	0.396128											1
miR-192	up	USP12	down	0.906243											1
miR-192	up	FNBP1	down	0.675623											1
miR-192	up	RAB23	down	0.276834											1
miR-192	up	ARHGEF10	down	0.474491											1
miR-192	up	PDLIM3	down	0.428187											1
miR-192	up	DNAJB5	down	0.33356											1
miR-192	up	EML1	down	0.456306											1
miR-192	up	SIRT1	down	0.80423											1
miR-192	up	PRKAA2	down	0.193182											1
miR-192	up	PTBP2	down	0.348982											1
miR-192	up	FZD7	down	0.159328											1
miR-192	up	HSPA2	down	0.991091											1
miR-192	up	TBL1X	down	0.368317											1
miR-96	up	JAZF1	down	0.975903											1
miR-96	up	PPP1R12A	down	0.79527											1
miR-96	up	ATXN1	down	0.889539											1
miR-93	up	KATNAL1	down	0.41616											1
miR-33a	up	KLF9	down	0.284361											1
miR-32	up	KLHL42	down	0.443989											1
miR-32	up	FGF2	down	0.860771											1
miR-32	up	SETD7	down	0.619566											1
miR-32	up	ATXN1	down	0.327908											1
miR-32	up	ITPR1	down	0.88023											1
miR-32	up	PPP1R12C	down	0.686559											1
miR-21	up	NEK1	down	0.522336											1
miR-18a	up	RAB23	down	-0.0059037											1
miR-17	up	TCEAL1	down	0.492237											1
miR-17	up	HSPB2	down	0.356059											1
miR-1301	up	CORO1C	down	0.387759											1
miR-877	up	USP2	down	0.88286											1
miR-671	up	GJC1	down	0.728652											1
miR-455	up	MAPRE2	down	0.170346											1
miR-455	up	MAP1B	down	0.290726											1
miR-455	up	BMPR1A	down	0.566459											1
miR-455	up	EPHA7	down	0.494159											1
miR-28	down	HIC2	up	0.554008											1
miR-28	down	YDJC	up	1.23156											1
miR-18a	up	NFIC	down	0.139003											1
miR-425	up	KLHL15	down	0.872284											1
miR-425	up	PPARGC1A	down	0.61785											1
miR-378a	down	HIC2	up	1.06701											1
miR-378a	down	MOGS	up	0.818041											1
miR-200c	up	FLNA	down	1.0404											1
miR-195	down	TMC6	up	1.0215											1
miR-149	up	ABL1	down	0.825992											1
miR-149	up	CALD1	down	0.70058											1
miR-149	up	LRIG1	down	0.633975											1
miR-149	up	ELMSAN1	down	0.657634											1
miR-149	up	PLEKHO1	down	0.529399											1
miR-149	up	FLNA	down	0.497907											1
miR-149	up	SERINC1	down	0.465696											1
miR-149	up	AKAP13	down	0.546666											1
miR-149	up	MICAL1	down	0.30859											1
miR-149	up	NFIX	down	0.3618											1
miR-149	up	FSTL1	down	0.905026											1
miR-27b	down	HIST1H1C	up	0.596642											1
miR-27b	down	DPF1	up	0.136409											1
miR-27b	down	RAB3B	up	0.450672											1
miR-23b	down	ITPR3	up	0.880534											1
miR-23b	down	DONSON	up	0.259253											1
miR-210	up	SCN1B	down	0.540526											1
miR-183	up	NHSL2	down	0.772237											1
miR-183	up	GATA6	down	0.414277											1
miR-183	up	TMEM245	down	0.474552											1
miR-183	up	TMEM108	down	0.900234											1
miR-183	up	ITGA5	down	0.410457											1
miR-183	up	ZFHX4	down	0.360347											1
miR-182	up	CBX6	down	0.726428											1
miR-100	down	ALG3	up	0.449014											1
miR-100	down	WDR4	up	0.476428											1
miR-100	down	DCBLD1	up	0.467888											1
miR-31	up	FLNA	down	0.627058											1
miR-31	up	GYG1	down	0.477213											1
miR-17	up	PRKCA	down	0.70341											1
miR-17	up	RAB23	down	0.216993											1
miR-17	up	ADARB1	down	0.331436											1
miR-17	up	MBNL1	down	0.327461											1
miR-17	up	IGFBP5	down	0.137412											1
miR-17	up	RYR2	down	0.462343											1
miR-17	up	EPB41L2	down	0.577923											1
miR-17	up	DPYSL2	down	0.828452											1
miR-17	up	ARHGAP10	down	0.5042											1
miR-17	up	FER	down	0.682706											1
miR-142	up	ROCK2	down	0.751157											1
miR-203a	up	PRKCA	down	0.817777											1
miR-335	up	ZEB2	down	0.887619											1
miR-224	up	TCEAL1	down	0.604378											1
miR-96	up	CCND2	down	1.13018											1
miR-203a	up	JMY	down	0.74895											1
miR-203a	up	TCF4	down	0.554693											1
miR-224	up	DPYSL2	down	0.639581											1
miR-31	up	RAB27A	down	1.14331											1
miR-200c	up	SEC23A	down	1.04621											1
miR-135b	up	LATS2	down	0.748312											1
miR-210	up	FOXN3	down	0.400759											1
miR-210	up	EHD2	down	0.478007											1
miR-17	up	ZBTB4	down	0.0536492											1
miR-335	up	DAAM2	down	0.411117											1
miR-17	up	PDLIM7	down	0.533106											1
miR-205	up	ITGA5	down	0.856845											1
miR-204	down	TMPRSS3	up	0.677688											1
miR-149	up	FGFR1	down	1.02411											1
miR-200b	up	RAB23	down	0.828214											1
miR-195	down	MYB	up	0.655454											1
miR-32	up	REV3L	down	0.680801											1
miR-32	up	ATP2B4	down	0.749633											1
miR-200b	up	RASSF8	down	0.40421											1
miR-200c	up	RASSF8	down	0.706292											1
miR-429	up	RASSF8	down	0.512525											1
miR-4724	up	RASSF8	down	0.289943											1
miR-195	down	TARBP2	up	0.648177											1
miR-17	up	PRKACB	down	0.557554											1
miR-20a	up	PRKACB	down	0.386224											1
miR-203a	up	PRKACB	down	1.03676											1
miR-187	up	MIDN	down	0.409155											1
miR-1301	up	MBNL1	down	0.292376											1
miR-142	up	TGFBR2	down	0.704892											1
miR-519d	up	TGFBR2	down	0.774273											1
miR-6854	up	JADE1	down	0.089295											1
miR-32	up	MAP1B	down	0.64499											1
miR-224	up	JMY	down	1.05315											1
miR-200b	up	ZFHX4	down	0.41567											1
miR-200c	up	ZFHX4	down	0.35078											1
miR-429	up	ZFHX4	down	0.440838											1
miR-205	up	KLHL15	down	0.348027											1
miR-142	up	ENTPD1	down	0.798225											1
miR-17	up	PPP1R12B	down	0.0760584											1
miR-577	up	CLIC4	down	0.794794											1
miR-187	up	LDLR	down	0.294542											1
miR-519d	up	ASB1	down	0.375266											1
miR-32	up	TACC1	down	0.792875											1
miR-203a	up	KLHL15	down	0.441028											1
miR-17	up	CHIC1	down	-0.0084486											1
miR-142	up	INPP5A	down	0.667421											1
miR-1262	down	FLVCR1	up	0.798629											1
miR-32	up	RORA	down	0.543489											1
miR-203a	up	MBNL1	down	0.855376											1
miR-7156	down	LMNB1	up	0.59943											1
miR-142	up	CREBRF	down	0.804893											1
miR-32	up	IL6ST	down	0.84858											1
miR-17	up	CAV1	down	0.512925											1
miR-519d	up	DPYSL2	down	0.886347											1
miR-944	up	DPYSL2	down	0.0371887											1
miR-192	up	CCND2	down	0.488691											1
miR-142	up	LPP	down	0.933507											1
miR-200c	up	TRPS1	down	0.0976316											1
miR-383	down	CHAC1	up	0.282282											1
miR-149	up	KLHL21	down	0.0467145											1
miR-3065	up	FAM102B	down	0.920195											1
miR-200b	up	KLHL42	down	0.836434											1
miR-200c	up	KLHL42	down	1.00192											1
miR-429	up	KLHL42	down	0.920822											1
miR-203a	up	SYNM	down	0.400335											1
miR-17	up	CYBRD1	down	-0.199815											1
miR-519d	up	CYBRD1	down	0.35956											1
miR-17	up	CLIP4	down	0.319453											1
miR-577	up	CLIP4	down	0.852863											1
miR-335	up	NFIB	down	0.382998											1
miR-17	up	BCL2L2	down	0.882649											1
miR-142	up	PRKCB	down	0.998107											1
miR-21	up	MAT2A	down	0.753295											1
miR-142	up	MGLL	down	0.97837											1
miR-20a	up	PRKG1	down	0.203173											1
miR-142	up	ZEB1	down	0.816441											1
miR-20a	up	RGS5	down	0.185124											1
miR-324	up	MYC	down	0.548385											1
miR-200b	up	SEC23A	down	0.877021											1
miR-200c	up	ROCK2	down	1.11371											1
miR-200b	up	ROCK2	down	1.17907											1
miR-142	up	SIRT1	down	0.429946											1
miR-200c	up	PKD1	down	1.08958											1
let-7c	down	DLX4	up	0.673366											1
miR-142	up	RNF38	down	0.706147											1
miR-205	up	MGLL	down	0.340128											1
miR-210	up	MEF2D	down	0.0056209											1
miR-142	up	MEF2D	down	1.06201											1
miR-20a	up	CCSER2	down	0.0134876											1
miR-20a	up	KATNAL1	down	0.741454											1
miR-20a	up	FYCO1	down	-0.003107											1
miR-142	up	FYCO1	down	1.04309											1
miR-20a	up	FAM129A	down	0.339058											1
miR-205	up	CLIP1	down	1.11143											1
miR-192	up	CNKSR3	down	0.574719											1
miR-4668	up	AK4	down	0.38857											1
miR-205	up	SYT11	down	0.321961											1
miR-192	up	CELF2	down	0.726067											1
miR-143	down	CASP5	up	0.648408											1
miR-192	up	CSRP1	down	-0.12931											1
miR-192	up	MAPRE2	down	0.45548											1
miR-203a	up	BMPR1A	down	0.875926											1
miR-100	down	CDCP1	up	0.554032											1
miR-203a	up	STOM	down	0.542929											1
miR-4786	down	PLEKHG4B	up	0.69566											1
miR-708	up	CTIF	down	0.412627											1
miR-203a	up	ROCK2	down	1.24431											1
miR-32	up	NCALD	down	0.597913											1
miR-203a	up	NCALD	down	0.34211											1
miR-100	down	CKS1B	up	0.31194											1
miR-142	up	BAG2	down	0.367778											1
miR-4668	up	DPP6	down	0.328962											1
miR-671	up	ZBTB4	down	0.202519											1
miR-205	up	ALPK3	down	0.829081											1
miR-203a	up	HTR2A	down	0.654927											1
miR-455	up	FKBP5	down	0.259465											1
miR-429	up	FKBP5	down	0.573736											1
miR-200c	up	FKBP5	down	0.605346											1
miR-200b	up	FKBP5	down	0.496559											1
miR-6499	up	OSBPL10	down	0.398625											1
miR-455	up	NT5DC3	down	0.403053											1
miR-6499	up	NT5DC3	down	0.487461											1
miR-548ba	down	PLA2G2F	up	0.303121											1
miR-455	up	MPL	down	0.341879											1
miR-455	up	MXRA7	down	0.481497											1
miR-455	up	DUSP19	down	-0.0745352											1
miR-4728	up	CAMK2A	down	0.211072											1
miR-4728	up	KCNK3	down	0.606471											1
miR-6499	up	C3	down	1.07011											1
miR-6854	up	LAMA4	down	0.944993											1
miR-767	up	TRPS1	down	0.428603											1
miR-6499	up	THRA	down	0.469542											1
miR-708	up	THRA	down	0.320434											1
miR-195	down	TFAP2A	up	0.294839											1
miR-20a	up	SLC16A7	down	0.376576											1
miR-577	up	SDC2	down	0.493078											1
miR-642a	up	RHOB	down	0.812017											1
miR-203b	up	RAB30	down	0.918965											1
miR-4728	up	PGM2L1	down	0.121722											1
miR-149	up	PGM2L1	down	1.06322											1
miR-142	up	PDE4D	down	0.873812											1
miR-210	up	NFIC	down	0.179592											1
miR-17	up	NFIB	down	0.200525											1
miR-149	up	MLXIP	down	0.580545											1
miR-224	up	MEF2D	down	0.377308											1
miR-183	up	LATS2	down	0.192998											1
miR-429	up	KIF13A	down	1.01674											1
miR-200b	up	KIF13A	down	1.02771											1
miR-200c	up	KIF13A	down	1.24611											1
miR-527	up	KCTD10	down	0.704276											1
miR-335	up	GNAL	down	0.28426											1
miR-301a	up	ELL2	down	0.650579											1
miR-877	up	DNAJB4	down	0.093682											1
miR-4728	up	CRISPLD2	down	0.676343											1
miR-149	up	CRISPLD2	down	0.814514											1
miR-455	up	CCSER2	down	0.685517											1
miR-6892	down	CASP2	up	0.399913											1
miR-17	up	ARHGAP1	down	0.698807											1
miR-1262	down	XRCC3	up	0.679162											1
miR-142	up	FZD7	down	0.932415											1
miR-4728	up	GATA6	down	0.151564											1
miR-142	up	ALG9	down	0.704798											1
miR-4724	up	SEC23A	down	0.73164											1
miR-429	up	SEC23A	down	0.932038											1
miR-139	down	KSR2	up	0.604755											1
miR-31	up	MXRA7	down	0.33255											1
miR-4728	up	SSBP2	down	0.0193924											1
miR-149	up	PKNOX2	down	1.07008											1
miR-143	down	GLRA3	up	0.70003											1
miR-6499	up	ANKRD53	down	0.0061042											1
miR-4728	up	KCNA5	down	0.2336											1
miR-149	up	AQP2	down	0.705083											1
miR-142	up	TMEM245	down	1.10938											1
miR-4728	up	NFIX	down	0.404722											1
miR-4728	up	NFIC	down	0.44955											1
miR-149	up	NFIC	down	0.267896											1
miR-642a	up	MEF2D	down	0.388846											1
miR-32	up	KIAA1614	down	0.533542											1
miR-142	up	IL6ST	down	0.893164											1
miR-642a	up	FOXN3	down	0.50066											1
miR-425	up	FOXN3	down	0.440435											1
miR-142	up	CPEB2	down	0.827671											1
miR-195	down	CASKIN1	up	0.0913639											1
miR-31	up	IL5RA	down	0.431328											1
miR-455	up	RASSF2	down	0.474154											1
miR-149	up	TAGLN	down	0.663245											1
miR-335	up	STAT5B	down	0.306165											1
miR-135b	up	GATA6	down	0.659042											1
miR-142	up	ZBTB20	down	0.53841											1
miR-203a	up	PTBP2	down	0.495884											1
miR-4724	up	TPD52L1	down	-0.100222											1
miR-429	up	TPD52L1	down	0.466175											1
miR-200c	up	TPD52L1	down	0.587266											1
miR-200b	up	TPD52L1	down	0.526972											1
miR-149	up	LONRF3	down	0.457643											1
miR-490	down	HIST1H2BD	up	0.525472											1
miR-183	up	STARD13	down	0.574671											1
miR-490	down	RAB11FIP4	up	0.65565											1
let-7c	down	RAB11FIP4	up	0.386523											1
miR-4724	up	PRICKLE2	down	1.06554											1
miR-671	up	HSPB8	down	0.290708											1
miR-584	up	GNG12	down	0.460944											1
miR-17	up	GATA6	down	0.187412											1
miR-200b	up	CLIP1	down	0.966587											1
miR-200a	up	CLIP1	down	1.03341											1
miR-21	up	ZNF460	down	0.505226											1
miR-6507	down	SMUG1	up	0.540107											1
miR-455	up	RIMS3	down	0.657446											1
miR-17	up	NACC2	down	0.59615											1
miR-708	up	KLHL15	down	0.749036											1
miR-32	up	KLHL15	down	0.104798											1
miR-708	up	FGF2	down	0.722175											1
miR-32	up	FAM129A	down	0.377313											1
miR-17	up	FAM129A	down	0.540307											1
miR-224	up	CREBRF	down	0.938717											1
miR-4728	up	TBX20	down	0.466232											1
miR-17	up	GPR155	down	0.258597											1
miR-23b	down	CHAF1B	up	0.452477											1
miR-32	up	TPPP	down	0.813025											1
miR-455	up	PIK3R1	down	0.500971											1
miR-142	up	KLHL15	down	0.289901											1
miR-23b	down	HIST3H2BB	up	0.440653											1
miR-708	up	C1orf21	down	0.553838											1
miR-335	up	AKAP12	down	0.608967											1
miR-32	up	MOAP1	down	0.668232											1
miR-32	up	SETBP1	down	0.479233											1
miR-17	up	RBM20	down	0.58842											1
miR-93	up	RBM20	down	0.824087											1
miR-20a	up	RBM20	down	0.49405											1
miR-944	up	NPR1	down	0.30625											1
miR-17	up	KCNMB1	down	0.525993											1
miR-339	up	ZNF460	down	0.403145											1
miR-455	up	PTBP2	down	0.483067											1
miR-6499	up	PTBP2	down	0.69804											1
miR-32	up	PPARGC1A	down	0.52663											1
miR-6499	up	MCAM	down	0.0155887											1
miR-135b	up	CNKSR3	down	0.597996											1
miR-93	up	CNKSR3	down	0.682221											1
miR-4786	down	ZNF468	up	0.652114											1
miR-4786	down	FANCA	up	0.696161											1
miR-139	down	TMPRSS12	up	1.07661											1
miR-4724	up	KY	down	0.0869769											1
miR-671	up	ZNF853	down	0.727868											1
miR-32	up	GULP1	down	0.408572											1
miR-32	up	FBLN2	down	0.800967											1
miR-374b	down	TMEM44	up	0.76781											1
miR-100	down	SMPDL3B	up	0.565353											1
miR-365b	down	ZNF675	up	0.691528											1
miR-365a	down	ZNF675	up	0.688613											1
miR-642a	up	ADAM33	down	0.042135											1
miR-944	up	PDE5A	down	0.826178											1
miR-26a-2	down	IYD	up	0.723264											1
miR-26a-1	down	IYD	up	0.717487											1
miR-203a	up	SERINC1	down	0.754523											1
miR-32	up	SMTN	down	0.640625											1
miR-224	up	FAT3	down	0.545266											1
miR-32	up	VLDLR	down	0.67225											1
miR-142	up	RPS6KA5	down	0.77329											1
miR-17	up	RPS6KA5	down	0.458616											1
miR-142	up	RAB30	down	0.44081											1
miR-4724	up	PYGO1	down	0.578134											1
miR-425	up	PLSCR4	down	0.275826											1
miR-671	up	MAOB	down	0.381938											1
miR-335	up	MAOB	down	0.153569											1
miR-584	up	KCTD10	down	1.19334											1
miR-17	up	KCNJ8	down	0.370918											1
miR-32	up	GPC6	down	0.786137											1
miR-17	up	FBXL7	down	0.615431											1
miR-4724	up	DPYSL2	down	0.529394											1
miR-577	up	CTGF	down	0.281594											1
miR-32	up	CCSER2	down	0.677611											1
miR-3074	up	CCND2	down	0.98056											1
miR-4724	up	ABCD2	down	0.830438											1
miR-143	down	C15orf48	up	0.840488											1
miR-28	down	C15orf48	up	0.654087											1
miR-6499	up	ERC1	down	0.708431											1
miR-142	up	CC2D2A	down	0.259111											1
miR-32	up	CC2D2A	down	0.581191											1
miR-195	down	PRSS21	up	0.40923											1
miR-374b	down	DHCR7	up	0.50413											1
miR-7156	down	DHCR7	up	0.857586											1
miR-205	up	ITM2A	down	-0.0133482											1
miR-142	up	PDZRN4	down	0.495312											1
miR-3074	up	TNRC6C	down	0.878138											1
miR-205	up	TMEM245	down	0.693417											1
miR-19a	up	MBNL3	down	0.376344											1
miR-205	up	KATNAL1	down	0.711507											1
miR-17	up	KATNAL1	down	1.02527											1
miR-944	up	GATA6	down	0.213898											1
miR-141	up	GATA6	down	0.717827											1
miR-32	up	GATA6	down	0.548847											1
miR-203a	up	FYCO1	down	1.01882											1
miR-6892	down	E2F8	up	0.814121											1
miR-17	up	CLIC4	down	0.576048											1
miR-142	up	ATXN1	down	0.873493											1
miR-17	up	ATXN1	down	0.347908											1
miR-200b	up	WWTR1	down	0.919302											1
miR-200a	up	WWTR1	down	1.01355											1
miR-455	up	PTGES3L	down	0.341441											1
miR-6499	up	PTGES3L	down	0.334747											1
miR-142	up	TBX4	down	0.361968											1
miR-32	up	MYZAP	down	1.1464											1
miR-6507	down	ZIC5	up	0.531739											1
miR-20a	up	TMEM100	down	-0.0739108											1
miR-365b	down	SIX4	up	0.78633											1
miR-455	up	RUNX1T1	down	0.10539											1
miR-205	up	RCAN2	down	0.330718											1
miR-142	up	RCAN2	down	0.775466											1
miR-4724	up	PRKACB	down	0.295042											1
miR-182	up	PPP1R12A	down	0.744769											1
miR-224	up	MOAP1	down	0.397907											1
miR-32	up	LONRF3	down	0.959831											1
miR-429	up	GATA6	down	0.602642											1
miR-200c	up	GATA6	down	0.562363											1
miR-200b	up	GATA6	down	0.58667											1
miR-3074	up	GATA6	down	0.476182											1
miR-203a	up	GATA6	down	0.255766											1
miR-577	up	FGF2	down	0.612326											1
miR-17	up	CFL2	down	0.926538											1
miR-224	up	CCSER2	down	0.663639											1
miR-138-1	up	CCND2	down	0.416284											1
miR-32	up	BMPR1A	down	0.664553											1
miR-455	up	ATXN1	down	0.732496											1
miR-301b	up	KLHL21	down	0.252281											1
miR-671	up	ENTPD1	down	0.0686936											1
miR-425	up	ZNF460	down	0.475369											1
miR-4724	up	KLHL15	down	0.233682											1
miR-1270	up	IGFBP5	down	0.521976											1
miR-203a	up	IGFBP5	down	0.0805419											1
miR-671	up	CORO1C	down	0.457944											1
miR-335	up	AOC3	down	0.397629											1
miR-455	up	FAM229B	down	0.102452											1
miR-3074	up	DUSP3	down	0.375635											1
miR-195	down	VAV2	up	0.386618											1
miR-32	up	MYADM	down	1.18148											1
miR-4668	up	KCNB1	down	0.482661											1
miR-17	up	KCNB1	down	0.762454											1
miR-4724	up	GNG12	down	0.181717											1
miR-3074	up	CREBRF	down	0.37033											1
miR-708	up	AKT3	down	0.291521											1
miR-142	up	AK4	down	0.371575											1
miR-6499	up	DMD	down	0.149149											1
miR-28	down	PRSS16	up	0.494889											1
miR-195	down	CCDC14	up	0.574289											1
miR-942	up	PRKD1	down	0.287059											1
miR-519d	up	ITGA9	down	0.737597											1
miR-135b	up	THRA	down	1.18787											1
miR-6499	up	CRISPLD2	down	0.353586											1
miR-7156	down	ERBB2	up	0.314223											1
miR-455	up	BNC2	down	0.0750495											1
miR-525	up	GPM6B	down	0.537629											1
miR-335	up	GFRA1	down	0.443672											1
miR-141	up	HSPA2	down	0.592639											1
miR-204	down	ZWILCH	up	0.492405											1
miR-1301	up	ZNF25	down	0.488143											1
miR-141	up	PRSS23	down	1.19428											1
miR-335	up	RPS6KA5	down	0.608069											1
miR-339	up	CHRM3	down	0.594663											1
miR-4652	up	TNRC6C	down	0.822406											1
miR-642a	up	MYOCD	down	0.265445											1
miR-335	up	KCNN3	down	0.212805											1
miR-32	up	FAT3	down	0.918218											1
miR-4724	up	ANTXR2	down	0.547888											1
miR-143	down	GALNT6	up	0.372274											1
miR-6892	down	ZNF488	up	0.629441											1
miR-335	up	TMTC1	down	0.32885											1
miR-335	up	COLEC12	down	0.755022											1
miR-455	up	SNX9	down	0.662941											1
miR-20a	up	FAXC	down	0.815188											1
miR-17	up	FAXC	down	1.02031											1
miR-642a	up	MPP2	down	0.829966											1
miR-525	up	JPH2	down	0.295736											1
miR-642a	up	CELF2	down	0.204982											1
miR-584	up	CAV1	down	1.00294											1
miR-374b	down	ACSBG1	up	0.571322											1
miR-642a	up	OTUD7A	down	0.698877											1
miR-20a	up	COL19A1	down	0.502951											1
miR-4652	up	GLIPR1L2	down	0.566131											1
miR-642a	up	RUSC2	down	0.486057											1
miR-642a	up	CHRM2	down	0.222883											1
miR-138-1	up	MRVI1	down	0.872104											1
miR-203a	up	KIF13A	down	0.829455											1
miR-17	up	JPH2	down	0.479099											1
miR-642a	up	TXLNB	down	0.107987											1
miR-4668	up	SLC8A1	down	0.819987											1
miR-204	down	SLC39A11	up	0.373444											1
miR-345	up	SAMD4A	down	0.584006											1
miR-3074	up	RBM20	down	1.0726											1
miR-4668	up	PPM1K	down	0.556829											1
miR-6892	down	OCIAD2	up	0.649109											1
miR-517b	up	NACC2	down	0.613802											1
miR-517a	up	NACC2	down	0.609461											1
miR-335	up	MYOCD	down	0.420439											1
miR-642a	up	KIAA0408	down	0.482631											1
miR-23b	down	HAPLN1	up	0.182799											1
miR-23c	down	HAPLN1	up	0.21533											1
miR-23b	down	FBN2	up	0.425645											1
miR-3074	up	BNC2	down	0.250436											1
miR-17	up	BNC2	down	0.248654											1
miR-6892	down	KSR2	up	0.71018											1
miR-34c	up	CPEB3	down	0.624258											1
miR-4724	up	TBX4	down	0.354262											1
miR-335	up	KCND3	down	0.336606											1
miR-204	down	BID	up	0.178755											1
miR-642a	up	FER	down	0.944908											1
miR-203b	up	CACNB2	down	0.614475											1
miR-642a	up	ANTXR2	down	0.375218											1
miR-6499	up	KCNE4	down	0.146405											1
miR-149	up	OSBPL10	down	1.01672											1
miR-4728	up	XKR4	down	0.101808											1
miR-149	up	XKR4	down	0.844079											1
miR-149	up	GLP2R	down	0.625456											1
miR-525	up	GLP2R	down	0.519137											1
miR-4636	up	NACC2	down	0.483062											1
miR-425	up	ACACB	down	0.174146											1
miR-27b	down	UBXN11	up	0.839787											1
miR-5698	down	PGBD5	up	0.660728											1
miR-149	up	DNAH9	down	0.536281											1
miR-616	up	TMEM132B	down	0.166462											1
miR-4728	up	WWTR1	down	0.265083											1
miR-149	up	WWTR1	down	0.852766											1
miR-4724	up	HFM1	down	0.242117											1
miR-1304	up	DIRAS1	down	0.355011											1
miR-378a	down	ZBTB8B	up	0.375274											1
miR-7156	down	SIX1	up	0.84979											1
miR-335	up	RNF150	down	0.726291											1
miR-1262	down	MELK	up	0.325027											1
miR-149	up	CRTAP	down	0.795069											1
miR-365b	down	RAB17	up	0.544272											1
miR-365a	down	RAB17	up	0.541833											1
miR-642a	up	SCUBE3	down	1.0325											1
miR-642a	up	GNAZ	down	0.36798											1
miR-4724	up	KCNN3	down	0.902575											1
miR-23b	down	SNTG1	up	0.568742											1
miR-378a	down	ERVMER34-1	up	0.506358											1
miR-767	up	VLDLR	down	0.475443											1
miR-138-1	up	FREM1	down	0.581998											1
miR-205	up	ANGPTL7	down	0.838825											1
miR-141	up	MKX	down	0.699388											1
miR-4668	up	MKX	down	0.518078											1
miR-6892	down	FAM110A	up	0.708924											1
miR-455	up	FNBP1	down	0.48238											1
miR-6499	up	FNBP1	down	0.471426											1
miR-6892	down	MTG1	up	0.719864											1
miR-195	down	BID	up	0.790662											1
miR-642a	up	RGS5	down	0.337942											1
miR-3074	up	FBXO31	down	0.205473											1
miR-1304	up	SEMA3E	down	0.510216											1
miR-6507	down	WDR66	up	0.883234											1
miR-93	up	FER	down	0.236509											1
miR-335	up	ADAMTS8	down	0.413593											1
miR-642a	up	TMX4	down	0.207119											1
miR-204	down	UNC13D	up	-0.0232951											1
miR-6892	down	UNC13D	up	0.856433											1
miR-4652	up	WASF3	down	0.471847											1
miR-942	up	WASF3	down	0.383333											1
miR-4668	up	SETBP1	down	0.686694											1
miR-651	up	SETBP1	down	0.0811935											1
miR-204	down	RAB11FIP4	up	0.570537											1
miR-141	up	PRKAA2	down	0.415778											1
miR-149	up	NPTX1	down	0.880248											1
miR-204	down	MEX3A	up	0.856147											1
miR-204	down	MDFI	up	0.212319											1
miR-204	down	HCAR2	up	-0.107423											1
miR-525	up	GNG12	down	0.019639											1
miR-4668	up	FAXC	down	0.389236											1
miR-7156	down	DRAXIN	up	0.86568											1
miR-30a	down	CACNA1E	up	0.131628											1
miR-942	up	ATXN1	down	0.412176											1
miR-4668	up	AMOTL2	down	0.72566											1
miR-642a	up	AKAP2	down	0.72084											1
miR-4724	up	AKAP2	down	0.782104											1
miR-130b	up	EPHX2	down	0.203338											1
miR-1262	down	DSN1	up	0.595994											1
miR-183	up	AKAP13	down	0.510559											1
miR-6499	up	JPH2	down	0.475143											1
miR-143	down	IYD	up	0.852958											1
miR-1304	up	BHMT2	down	0.530614											1
miR-6499	up	XKR4	down	0.11636											1
miR-6499	up	WDR17	down	0.395583											1
miR-149	up	TMTC1	down	0.780504											1
miR-525	up	REEP2	down	0.432112											1
miR-149	up	LONRF2	down	0.659051											1
miR-708	up	CRISPLD2	down	0.420078											1
miR-1304	up	BMPR1A	down	0.153655											1
miR-340	down	ZBTB8B	up	0.503803											1
miR-149	up	BVES	down	0.745598											1
miR-6499	up	BVES	down	0.378918											1
miR-17	up	SEMA3E	down	0.503022											1
miR-4728	up	SMTNL2	down	0.648178											1
miR-149	up	SMTNL2	down	0.721763											1
miR-335	up	PDE7B	down	0.835426											1
miR-616	up	SHE	down	0.487842											1
miR-6499	up	TMEM56	down	0.393049											1
miR-203b	up	KCNN3	down	0.405509											1
miR-425	up	GATA6	down	0.23227											1
miR-6499	up	ZNF106	down	1.16367											1
miR-1262	down	ZNF107	up	0.399263											1
miR-23b	down	POC1A	up	0.166121											1
miR-203b	up	PDLIM3	down	0.749298											1
miR-143	down	PROSER2	up	0.687495											1
miR-23b	down	OCIAD2	up	1.13567											1
miR-378a	down	TM4SF5	up	0.492204											1
miR-4728	up	ITGB3	down	0.812452											1
miR-149	up	ITGB3	down	0.498298											1
miR-23b	down	E2F2	up	0.304323											1
miR-6499	up	JAM2	down	0.0410092											1
miR-455	up	SCN3B	down	0.414032											1
miR-6499	up	SCN3B	down	0.157856											1
miR-455	up	STX2	down	0.73068											1
miR-6499	up	STX2	down	0.421896											1
miR-455	up	SCRG1	down	0.14023											1
miR-6499	up	SCRG1	down	0.420771											1
miR-200c	up	KCNE4	down	0.399703											1
miR-195	down	RS1	up	0.708141											1
miR-455	up	KATNAL1	down	0.784824											1
miR-6499	up	KATNAL1	down	0.780064											1
miR-17	up	BHMT2	down	0.07762											1
miR-17	up	PTGIS	down	0.321691											1
miR-17	up	SERINC1	down	0.653787											1
miR-3074	up	NECAB1	down	0.82369											1
miR-584	up	GSN	down	0.973889											1
miR-93	up	DNAJB4	down	0.214427											1
miR-17	up	DNAJB4	down	0.377396											1
miR-138-1	up	CYBRD1	down	0.31496											1
miR-942	up	NUDT7	down	0.363719											1
miR-455	up	KLHL30	down	0.479594											1
miR-6499	up	KLHL30	down	0.718998											1
miR-490	down	ZNF681	up	0.533135											1
miR-1262	down	AGMAT	up	0.537016											1
miR-149	up	ZNF460	down	0.480471											1
miR-10b	down	CENPL	up	0.525057											1
miR-455	up	IGSF9B	down	0.286856											1
miR-4728	up	C3	down	0.525578											1
miR-4728	up	CCDC80	down	0.461105											1
miR-149	up	CCDC80	down	0.711492											1
miR-455	up	CCDC80	down	0.0560176											1
miR-6499	up	CCDC80	down	0.547791											1
miR-149	up	TES	down	0.517848											1
miR-584	up	FYN	down	0.640281											1
miR-4668	up	RNF38	down	0.540113											1
miR-4786	down	PDXK	up	0.542547											1
miR-642a	up	PDE4D	down	0.637478											1
miR-4786	down	MYO10	up	0.447235											1
miR-149	up	MYADM	down	0.624828											1
miR-135b	up	MBNL1	down	0.606374											1
miR-141	up	LPP	down	1.35524											1
miR-181b-2	up	ELMSAN1	down	0.648339											1
miR-4668	up	CLIP1	down	0.666336											1
miR-181b-2	up	CLIC4	down	0.867688											1
miR-455	up	CLIC4	down	0.755317											1
miR-1301	up	ADCY9	down	0.354475											1
miR-940	up	SYT15	down	0.0408149											1
miR-6499	up	GPR155	down	0.982523											1
miR-340	down	APOL4	up	0.460043											1
miR-455	up	DNAJC18	down	0.479813											1
miR-210	up	NACC2	down	0.302151											1
miR-205	up	WDR17	down	0.275426											1
miR-335	up	MCAM	down	0.406032											1
miR-142	up	MCAM	down	0.835431											1
miR-335	up	GLIPR1L2	down	0.184807											1
miR-6892	down	OLR1	up	0.961714											1
miR-31	up	NLGN1	down	0.610205											1
miR-23c	down	CENPM	up	0.377169											1
miR-23b	down	CENPM	up	0.437466											1
miR-335	up	FAM229B	down	0.544926											1
miR-7156	down	CDCA4	up	0.258106											1
miR-3074	up	ABCD2	down	0.310472											1
miR-7156	down	PLEKHG4B	up	0.940054											1
miR-6892	down	PLEKHG4B	up	0.552869											1
miR-203b	up	CORO1C	down	0.263561											1
miR-378c	down	RCC2	up	0.431723											1
miR-378a	down	RCC2	up	0.807717											1
miR-642a	up	PGM2L1	down	0.811251											1
miR-182	up	PGM2L1	down	0.491597											1
miR-183	up	PGM2L1	down	0.620837											1
miR-6892	down	KCNC3	up	0.57012											1
miR-642a	up	ATP2B4	down	0.902109											1
miR-7156	down	ADAMTS20	up	0.966613											1
miR-519d	up	ZNF454	down	0.893424											1
miR-17	up	ZNF454	down	0.474661											1
miR-32	up	SHE	down	0.766182											1
miR-4652	up	FSTL1	down	0.645756											1
miR-138-1	up	MEOX2	down	0.784293											1
miR-204	down	ZBTB8B	up	0.523389											1
miR-4786	down	TRIM17	up	0.60552											1
miR-3074	up	PDLIM5	down	0.0781976											1
miR-205	up	PDLIM5	down	0.984074											1
miR-149	up	ZCCHC24	down	0.581386											1
miR-205	up	STARD8	down	0.418102											1
miR-4668	up	PTGIS	down	0.360146											1
miR-642a	up	DOK6	down	0.52278											1
miR-335	up	NEGR1	down	0.487922											1
miR-584	up	SOBP	down	0.662109											1
miR-425	up	ZHX3	down	0.388179											1
miR-942	up	GPR146	down	-0.0242297											1
miR-23b	down	CAMK2N2	up	-0.0130006											1
miR-205	up	KLHL5	down	0.986696											1
miR-17	up	TCF4	down	0.193066											1
miR-17	up	SEC23A	down	0.82773											1
miR-17	up	SACS	down	0.721053											1
miR-17	up	RAB30	down	0.489218											1
miR-17	up	PPP1R3B	down	0.0458782											1
miR-17	up	PGM2L1	down	0.33766											1
miR-17	up	MLXIP	down	0.21117											1
miR-32	up	MEF2D	down	0.897466											1
miR-27b	down	LRRC61	up	0.542795											1
miR-27b	down	LMNB2	up	0.286431											1
miR-17	up	CCSER2	down	0.295214											1
miR-17	up	ITPKB	down	0.346614											1
miR-17	up	FYCO1	down	0.134998											1
miR-17	up	TMEM245	down	0.470674											1
miR-17	up	ELMSAN1	down	0.385608											1
miR-17	up	C14orf28	down	0.481802											1
miR-204	down	HOXB7	up	0.381352											1
miR-206	down	ESR1	up		0.243538										1
miR-21	up	TGFBR2	down		0.479198										1
miR-155	up	2018-03-01	down		0.20784										1
miR-155	up	METTL7A	down		0.498291										1
miR-155	up	FMNL2	down		0.54255										1
miR-33a	up	ABCA1	down		0.128572										1
miR-375	up	RASD1	down		0.359218										1
miR-203a	up	SOCS3	down		0.464774										1
miR-378a	down	NPNT	up		0.244944										1
miR-378a	down	GALNT7	up		0.63158										1
miR-135b	up	KLF4	down		0.458515										1
miR-21	up	EGFR	down		0.511052										1
miR-335	down	RUNX2	up		0.335201										1
miR-203a	up	IL6	down		0.283633										1
miR-375	up	YAP1	down		0.158587										1
miR-200b	up	KDR	down		0.557757										1
miR-335	down	LRG1	up		0.416772										1
miR-141	up	PPARA	down		0.568476										1
miR-145	down	PAK4	up		0.392803										1
miR-155	up	BCL6	down		0.283163										1
miR-375	up	MAP3K8	down		-0.200874										1
miR-200a	up	YAP1	down		0.436437										1
miR-335	down	BIRC5	up		0.262621										1
miR-590	up	ID4	down		0.111242										1
miR-133b	down	HCN4	up		0.240796										1
miR-335	down	KCNH2	up		0.417215										1
miR-335	down	CACNB3	up		0.472923										1
miR-335	down	XKRX	up		0.320609										1
miR-335	down	APLP1	up		0.158355										1
miR-335	down	EFNA1	up		0.369311										1
miR-335	down	SEC14L4	up		0.149354										1
miR-335	down	CACNG1	up		0.536986										1
miR-335	down	EDDM3B	up		0.424073										1
miR-335	down	PARD6B	up		0.568007										1
miR-335	down	WNT7B	up		0.532795										1
miR-335	down	KRT19	up		0.51366										1
miR-335	down	PFKFB4	up		0.623866										1
miR-335	down	SLC37A1	up		0.627195										1
miR-335	down	GALNT5	up		0.474515										1
miR-335	down	CYP21A2	up		0.447533										1
miR-335	down	SERINC2	up		0.51372										1
miR-335	down	SYT14	up		0.105538										1
miR-335	down	MEIS3	up		0.427291										1
miR-335	down	KCNC1	up		0.598973										1
miR-335	down	ESRP1	up		0.482296										1
miR-335	down	GRB7	up		0.392855										1
miR-335	down	BFSP2	up		0.40216										1
miR-335	down	CLIC3	up		0.107837										1
miR-335	down	GBX2	up		0.0298432										1
miR-335	down	ARX	up		0.477266										1
miR-335	down	SUSD3	up		0.557034										1
miR-335	down	SLC30A2	up		0.489252										1
miR-335	down	TNFRSF9	up		0.0835616										1
miR-335	down	C8G	up		0.198875										1
miR-335	down	RAB11FIP1	up		0.674298										1
miR-335	down	NPAS1	up		0.347002										1
miR-335	down	CLCN2	up		0.481731										1
miR-335	down	GRIK4	up		0.262118										1
miR-335	down	ABCA12	up		0.412697										1
miR-335	down	SAG	up		0.643176										1
miR-335	down	FAM102A	up		0.354368										1
miR-335	down	CA14	up		0.573001										1
miR-335	down	TACR3	up		0.397089										1
miR-335	down	IYD	up		0.411935										1
miR-335	down	ILDR1	up		0.536442										1
miR-335	down	CYB561	up		0.435033										1
miR-335	down	FCRLA	up		0.298825										1
miR-335	down	RIIAD1	up		0.671222										1
miR-335	down	SLC4A8	up		0.764236										1
miR-335	down	RAB26	up		0.646612										1
miR-335	down	ABAT	up		0.538919										1
miR-335	down	SLC6A9	up		0.112809										1
miR-335	down	CRB3	up		0.493814										1
miR-335	down	COL11A1	up		0.138453										1
miR-335	down	MEPE	up		0.129992										1
miR-335	down	REPS2	up		0.410069										1
miR-335	down	CELSR3	up		0.346093										1
miR-335	down	TIGD3	up		0.418056										1
miR-335	down	UBD	up		0.312382										1
miR-335	down	SLC16A6	up		0.588017										1
miR-335	down	PRR15L	up		0.557249										1
miR-335	down	DYDC1	up		0.262205										1
miR-335	down	DNAAF3	up		0.659111										1
miR-335	down	CCL25	up		0.288715										1
miR-335	down	SLC12A3	up		0.289954										1
miR-335	down	CACNG4	up		0.600495										1
miR-335	down	TERT	up		0.530642										1
miR-335	down	OTOR	up		0.482184										1
miR-335	down	MARCKSL1	up		0.503969										1
miR-335	down	DIO1	up		0.306593										1
miR-335	down	VPREB3	up		0.27777										1
miR-335	down	MYO3B	up		0.364728										1
miR-335	down	SYT1	up		0.371965										1
miR-335	down	GRHL3	up		0.488084										1
miR-335	down	SRPK3	up		0.228575										1
miR-335	down	FOXA3	up		0.260901										1
miR-335	down	MUC5B	up		0.438895										1
miR-335	down	QPRT	up		0.217374										1
miR-335	down	TMEM190	up		0.411639										1
miR-335	down	TEKT1	up		0.328337										1
miR-335	down	ARSI	up		0.0972816										1
miR-335	down	CNIH2	up		0.21										1
miR-335	down	MUC1	up		0.475281										1
miR-335	down	MAGED2	up		0.546307										1
miR-335	down	MISP	up		0.737078										1
miR-335	down	CNFN	up		0.0613022										1
miR-335	down	CHST6	up		0.321703										1
miR-335	down	FGD3	up		0.210766										1
miR-335	down	SLC52A1	up		0.506055										1
miR-335	down	CCL20	up		0.236512										1
miR-335	down	GPR37L1	up		0.504842										1
miR-335	down	SNTN	up		0.306363										1
miR-335	down	CLDN7	up		0.670158										1
miR-335	down	MAST1	up		0.338365										1
miR-335	down	NEFH	up		0.411952										1
miR-335	down	CLEC11A	up		0.0614291										1
miR-335	down	UGT2B17	up		0.30496										1
miR-335	down	CLDN14	up		0.0917614										1
miR-335	down	ERMP1	up		0.562622										1
miR-335	down	FBN2	up		0.220701										1
miR-335	down	LYZL2	up		0.322715										1
miR-335	down	XIRP1	up		0.189332										1
miR-335	down	DCAF4L2	up		0.248327										1
miR-335	down	E2F5	up		0.553933										1
miR-335	down	RASGRP1	up		0.621063										1
miR-335	down	LINGO3	up		0.180422										1
miR-335	down	LLGL2	up		0.434232										1
miR-335	down	TJP3	up		0.712166										1
miR-335	down	SDF2L1	up		0.0578145										1
miR-335	down	NCAM2	up		0.510978										1
miR-335	down	CAPN13	up		0.549569										1
miR-335	down	2018-03-11	up		0.229542										1
miR-335	down	PODXL2	up		0.457155										1
miR-335	down	PDIA4	up		0.182302										1
miR-335	down	HGD	up		0.447911										1
miR-335	down	RALGPS2	up		0.834386										1
miR-335	down	JAKMIP2	up		0.355678										1
miR-335	down	DDN	up		0.301613										1
miR-335	down	PAH	up		0.567775										1
miR-335	down	SLC9A3R1	up		0.512122										1
miR-335	down	PPFIA4	up		0.413943										1
miR-335	down	KLHL35	up		0.265754										1
miR-335	down	PLA2G10	up		0.289175										1
miR-335	down	SNCB	up		0.165518										1
miR-335	down	CST1	up		0.222182										1
miR-335	down	NDP	up		0.267919										1
miR-335	down	PAQR6	up		0.544941										1
miR-335	down	CTXN1	up		0.350361										1
miR-335	down	MUC6	up		0.386941										1
miR-335	down	SDR16C5	up		0.302145										1
miR-335	down	PCSK4	up		0.558705										1
miR-335	down	KLHDC7B	up		0.287012										1
miR-335	down	AGR2	up		0.608645										1
miR-335	down	CDHR2	up		0.514437										1
miR-335	down	CST6	up		0.315149										1
miR-335	down	NKAIN1	up		0.428913										1
miR-335	down	ART3	up		0.10088										1
miR-335	down	ASCL2	up		0.218189										1
miR-335	down	TSTD1	up		0.246863										1
miR-335	down	MMEL1	up		0.405576										1
miR-335	down	COL9A3	up		0.198265										1
miR-335	down	SQLE	up		0.576287										1
miR-335	down	KIFC2	up		0.312541										1
miR-335	down	IL21R	up		0.114259										1
miR-335	down	PTPN7	up		0.227253										1
miR-335	down	DNMT3B	up		0.418264										1
miR-335	down	CA12	up		0.664732										1
miR-335	down	NUP210	up		0.729796										1
miR-335	down	RP1	up		0.350567										1
miR-335	down	CBX4	up		0.540188										1
miR-335	down	KLHL17	up		0.366395										1
miR-335	down	KCNK9	up		0.403901										1
miR-335	down	CHRNB4	up		0.318075										1
miR-335	down	SPDEF	up		0.669673										1
miR-335	down	TRPM8	up		0.299951										1
miR-335	down	SLC7A13	up		0.544125										1
miR-335	down	HSH2D	up		0.570064										1
miR-335	down	MS4A8	up		0.337907										1
miR-335	down	STX1A	up		0.397587										1
miR-335	down	KDM4B	up		0.45426										1
miR-335	down	ZPLD1	up		0.300219										1
miR-335	down	WFIKKN1	up		0.544353										1
miR-335	down	HPDL	up		0.46144										1
miR-335	down	HOXB1	up		0.413203										1
miR-335	down	CFB	up		0.230938										1
miR-335	down	MAT1A	up		0.4262										1
miR-335	down	HMGA1	up		0.421344										1
miR-335	down	PRSS8	up		0.545114										1
miR-335	down	SYN1	up		0.257209										1
miR-335	down	HSD17B7	up		0.456146										1
miR-335	down	ENHO	up		0.21982										1
miR-335	down	ISG20	up		0.320142										1
miR-335	down	NLRP2	up		0.434134										1
miR-335	down	OGDHL	up		0.545937										1
miR-335	down	DOPEY2	up		0.541083										1
miR-335	down	MYBPH	up		0.397362										1
miR-335	down	CALML5	up		0.273434										1
miR-335	down	HES2	up		0.14618										1
miR-335	down	HMGB3	up		0.287042										1
miR-335	down	ADAM8	up		0.314555										1
miR-335	down	ANKRD22	up		0.464746										1
miR-335	down	SCGB2A2	up		0.457868										1
miR-335	down	AGXT2	up		0.170734										1
miR-335	down	HGFAC	up		0.456247										1
miR-335	down	AGR3	up		0.651863										1
miR-335	down	BIK	up		0.568568										1
miR-335	down	TRIB3	up		0.450189										1
miR-335	down	ZG16B	up		0.69202										1
miR-335	down	COLEC10	up		0.336266										1
miR-335	down	MSLN	up		0.345247										1
miR-335	down	HID1	up		0.666623										1
miR-148b	up	LAMC2	down		0.255428										1
miR-148b	up	DNAJB4	down		-0.0229865										1
miR-148b	up	PROX1	down		0.0717379										1
miR-148b	up	PRNP	down		-0.0402232										1
miR-148b	up	KCNJ16	down		0.0297899										1
miR-148b	up	CCL28	down		0.197275										1
miR-375	up	EIF4EBP2	down		0.749942										1
miR-375	up	RHOQ	down		0.487876										1
miR-375	up	ZFP36L2	down		-0.0413598										1
miR-375	up	FAM89A	down		0.38511										1
miR-375	up	CYP2U1	down		0.487132										1
miR-375	up	SAMD4A	down		0.272616										1
miR-375	up	SH3D19	down		0.65597										1
miR-375	up	F3	down		0.0997072										1
miR-375	up	FZD4	down		0.83318										1
miR-375	up	EMP1	down		0.0854466										1
miR-375	up	TTC7B	down		0.408691										1
miR-375	up	CRIM1	down		0.172289										1
miR-375	up	CELF2	down		0.437602										1
miR-375	up	ACSL4	down		0.369768										1
miR-155	up	PCYOX1	down		0.216601										1
miR-155	up	SCD	down		0.190078										1
miR-155	up	RETSAT	down		0.2135										1
miR-155	up	MCAM	down		0.392001										1
miR-155	up	FGF2	down		0.33412										1
miR-155	up	CFL2	down		0.303991										1
miR-155	up	NR3C1	down		0.364327										1
miR-155	up	GPAM	down		0.180932										1
miR-155	up	KANK2	down		0.168692										1
miR-155	up	DMD	down		0.417275										1
miR-155	up	AKR1C3	down		0.213238										1
miR-155	up	FSTL1	down		0.115313										1
miR-155	up	EGFR	down		0.615718										1
miR-155	up	MEST	down		0.155605										1
miR-155	up	EPB41L2	down		0.48226										1
miR-155	up	PYGL	down		0.4252										1
miR-155	up	CD36	down		0.376818										1
miR-145	down	TPM3	up		0.239214										1
miR-145	down	ABRACL	up		0.203808										1
miR-145	down	ABHD17C	up		0.252937										1
miR-143	down	MMP13	up		0.452855										1
miR-215	down	MKI67	up		0.466205										1
miR-215	down	FAM222A	up		0.660008										1
miR-215	down	RAD54B	up		0.343549										1
miR-215	down	C1orf112	up		0.403773										1
miR-215	down	MAP6D1	up		0.43373										1
miR-215	down	LMNB1	up		0.655238										1
miR-215	down	DEPDC1	up		0.474145										1
miR-215	down	CENPK	up		0.488423										1
miR-215	down	BRCA2	up		0.460853										1
miR-215	down	LMNB2	up		0.457933										1
miR-215	down	LRP8	up		0.520925										1
miR-215	down	SLC7A11	up		0.595449										1
miR-215	down	TRIM59	up		0.639151										1
miR-215	down	RACGAP1	up		0.346721										1
miR-215	down	SKA1	up		0.519675										1
miR-215	down	KIF24	up		0.45279										1
miR-215	down	SIX4	up		0.105109										1
miR-215	down	FEN1	up		0.483722										1
miR-215	down	RFC4	up		0.614125										1
miR-215	down	HJURP	up		0.488113										1
miR-215	down	PSRC1	up		0.579628										1
miR-215	down	RMI1	up		0.388855										1
miR-215	down	KIF14	up		0.379725										1
miR-215	down	KIF23	up		0.670601										1
miR-215	down	GPR19	up		0.479239										1
miR-215	down	FAM83D	up		0.418713										1
miR-215	down	CCDC150	up		0.197797										1
miR-215	down	BRIP1	up		0.655342										1
miR-215	down	EME1	up		0.567984										1
miR-215	down	CENPF	up		0.496206										1
miR-215	down	OTUB2	up		0.191161										1
miR-215	down	CCNO	up		0.446633										1
miR-215	down	NMU	up		0.51804										1
miR-215	down	TRAIP	up		0.629838										1
miR-215	down	REEP1	up		0.205171										1
miR-215	down	NUF2	up		0.458955										1
miR-215	down	NOD2	up		0.438376										1
miR-215	down	TRIP13	up		0.535527										1
miR-215	down	MAD2L1	up		0.631173										1
miR-215	down	RAD51	up		0.469942										1
miR-215	down	HMMR	up		0.380747										1
miR-215	down	CDC20	up		0.556437										1
miR-215	down	FOXA1	up		0.462726										1
miR-215	down	ECT2	up		0.451717										1
miR-215	down	ENTPD7	up		0.247996										1
miR-215	down	ERMP1	up		0.112716										1
miR-215	down	ASPM	up		0.403672										1
miR-215	down	TROAP	up		0.528755										1
miR-215	down	KIF20A	up		0.417791										1
miR-215	down	KIFC1	up		0.583753										1
miR-215	down	PLK4	up		0.361106										1
miR-215	down	SLC16A6	up		0.455974										1
miR-215	down	CKAP2L	up		0.456956										1
miR-215	down	CDC7	up		0.300328										1
miR-215	down	PLEKHF2	up		0.183934										1
miR-215	down	EEF1A2	up		0.519566										1
miR-215	down	DLGAP5	up		0.546557										1
miR-215	down	ORC1	up		0.656591										1
miR-215	down	CIT	up		0.451032										1
miR-215	down	KIF18A	up		0.545162										1
miR-215	down	CEP55	up		0.365919										1
miR-215	down	NEIL3	up		0.446148										1
miR-215	down	STIL	up		0.645331										1
miR-215	down	RTKN2	up		0.592308										1
miR-215	down	CDCA4	up		0.557564										1
miR-215	down	MANF	up		0.459765										1
miR-215	down	TICRR	up		0.634425										1
miR-215	down	ERCC6L	up		0.530915										1
miR-215	down	TTK	up		0.610069										1
miR-215	down	RIMKLA	up		0.433048										1
miR-215	down	BLM	up		0.400063										1
miR-215	down	ANLN	up		0.363451										1
miR-215	down	PASK	up		0.457728										1
miR-215	down	RDM1	up		0.557417										1
miR-215	down	E2F8	up		0.437302										1
miR-215	down	BARD1	up		0.668676										1
miR-192	up	THBD	down		0.418074										1
miR-192	up	AFAP1L1	down		0.0637353										1
miR-192	up	PPARG	down		0.441165										1
miR-192	up	ID1	down		0.388596										1
miR-192	up	LRRC8C	down		0.241926										1
miR-192	up	TMEM246	down		0.128423										1
miR-192	up	BTNL9	down		0.333534										1
miR-192	up	RBP7	down		0.333044										1
miR-192	up	VGLL3	down		0.181324										1
miR-192	up	FZD4	down		0.24305										1
miR-192	up	KLF10	down		0.0631515										1
miR-192	up	KCTD12	down		0.305452										1
miR-192	up	PXDC1	down		0.254762										1
miR-192	up	PCOLCE2	down		0.245349										1
miR-96	up	MGST1	down		0.505243										1
miR-96	up	PRDM16	down		0.167872										1
miR-93	up	RND3	down		0.0823317										1
miR-33a	up	ANKRD29	down		0.0415643										1
miR-21	up	C20orf194	down		0.515025										1
miR-21	up	SGCB	down		0.404373										1
miR-21	up	CYBRD1	down		0.531208										1
miR-21	up	REV3L	down		0.299152										1
miR-21	up	PKD2	down		0.416346										1
miR-21	up	EIF4EBP2	down		0.396198										1
miR-21	up	SASH1	down		0.382917										1
miR-21	up	FOXN3	down		0.748855										1
miR-21	up	GPAM	down		0.486927										1
miR-21	up	CLIP4	down		0.54179										1
miR-21	up	RHOQ	down		0.508956										1
miR-21	up	FIGN	down		0.464135										1
miR-21	up	RPS6KA3	down		0.334956										1
miR-21	up	MYCBP2	down		0.575033										1
miR-21	up	PLD1	down		0.511518										1
miR-21	up	TLR4	down		0.498189										1
miR-21	up	BCL6	down		0.528521										1
miR-365a	down	HIST1H2AE	up		0.766365										1
miR-940	up	FZD7	down		0.255865										1
miR-877	up	OVCH2	down		0.227656										1
miR-877	up	EML5	down		0.255857										1
miR-615	up	BACH2	down		0.306312										1
miR-615	up	DST	down		0.254477										1
miR-92b	up	FOXN3	down		0.0331282										1
miR-18a	up	DAB2IP	down		0.514902										1
miR-503	up	LIX1L	down		0.546856										1
miR-503	up	RPS6KA3	down		0.408283										1
miR-326	down	PLA2G4F	up		0.410986										1
miR-326	down	MAZ	up		0.0732995										1
miR-342	up	FIGN	down		0.388223										1
miR-342	up	ZC3H12C	down		0.336498										1
miR-342	up	TACC1	down		0.340024										1
miR-378a	down	B4GALNT3	up		0.727643										1
miR-378a	down	ZNF239	up		0.359745										1
miR-378a	down	HIST1H3H	up		0.0144265										1
miR-378a	down	E2F5	up		0.702511										1
miR-378a	down	RABEP2	up		0.384366										1
miR-378a	down	BRIP1	up		0.396608										1
miR-365a	down	BAX	up		0.112054										1
miR-183	up	MYCBP2	down		0.201352										1
miR-183	up	FOXN2	down		0.434348										1
miR-182	up	ANO6	down		0.609691										1
miR-100	down	ANAPC11	up		0.333224										1
miR-100	down	LIN28B	up		0.361212										1
miR-99a	down	TUBG1	up		0.19018										1
miR-141	up	YAP1	down		0.256978										1
miR-200c	up	DUSP1	down		0.197751										1
miR-10b	down	PLK1	up		-0.0453127										1
miR-145	down	SOX11	up		0.463437										1
miR-193a	down	SLC7A5	up		0.404735										1
miR-200c	up	KDR	down		0.55538										1
miR-200b	up	DLC1	down		0.329099										1
miR-200c	up	DLC1	down		0.318182										1
miR-190b	up	IGF1	down		0.573506										1
miR-493	up	FZD4	down		0.792465										1
miR-4668	up	SCD	down		0.494297										1
miR-503	up	TEAD1	down		0.336847										1
miR-193a	down	PMAIP1	up		0.229487										1
miR-4732	down	PPP1R37	up		0.251725										1
miR-203a	up	FMNL2	down		0.544103										1
miR-181b-2	up	QKI	down		0.375106										1
miR-141	up	QKI	down		0.396791										1
miR-200a	up	QKI	down		0.573379										1
miR-200b	up	ACSL4	down		0.520952										1
miR-200c	up	ACSL4	down		0.400675										1
miR-429	up	ACSL4	down		0.590542										1
miR-106a	up	PRNP	down		0.287452										1
miR-301a	up	PRNP	down		0.231935										1
miR-454	up	PRNP	down		0.212115										1
miR-92b	up	KAT2B	down		0.140151										1
miR-584	down	CDC25A	up		0.365927										1
miR-493	up	SCD	down		0.278185										1
miR-503	up	CREBRF	down		0.275442										1
miR-200b	up	QKI	down		0.515715										1
miR-200c	up	QKI	down		0.372768										1
miR-429	up	QKI	down		0.590861										1
miR-200b	up	ANKRD33B	down		0.31791										1
miR-200c	up	ANKRD33B	down		0.121142										1
miR-429	up	ANKRD33B	down		0.415925										1
miR-92b	up	TEF	down		0.110603										1
miR-452	down	ZWINT	up		0.642272										1
miR-183	up	NR3C1	down		0.265834										1
miR-144	down	EZH2	up		0.264989										1
miR-182	up	CREB5	down		0.20545										1
miR-145	down	PADI1	up		0.28728										1
miR-452	down	LEF1	up		0.508328										1
miR-675	down	CDC6	up		0.0835602										1
miR-206	down	CCND1	up		0.226194										1
miR-193a	down	ERBB2	up		0.596581										1
miR-145	down	HDAC11	up		0.236767										1
miR-10b	down	TCF19	up		-0.0694838										1
miR-493	up	VLDLR	down		0.641612										1
miR-493	up	MYCBP2	down		0.533784										1
miR-155	up	EZH1	down		0.363521										1
miR-365b	down	STXBP2	up		0.597414										1
miR-365a	down	STXBP2	up		0.599443										1
miR-192	up	PLA2G5	down		0.144345										1
miR-3065	up	CTNNA3	down		0.266321										1
miR-155	up	PCCA	down		0.387312										1
miR-200b	up	METTL7A	down		0.623078										1
miR-200a	up	METTL7A	down		0.585841										1
miR-3065	up	FZD5	down		0.39197										1
miR-203a	up	PEAR1	down		0.429773										1
miR-200c	up	ZC3H12C	down		0.502655										1
miR-429	up	CDC14B	down		0.4191										1
miR-200c	up	CDC14B	down		0.435042										1
miR-200b	up	CDC14B	down		0.471155										1
miR-203a	up	ASPA	down		0.578746										1
miR-203b	up	TCN2	down		0.729069										1
miR-503	up	TLL1	down		0.475969										1
miR-155	up	HHIP	down		0.201377										1
miR-144	down	CDCA3	up		0.234548										1
miR-940	up	ATP13A4	down		0.219289										1
miR-4668	up	NEGR1	down		0.250157										1
miR-19a	up	PTPRB	down		-0.100017										1
miR-4728	up	TLCD2	down		0.375497										1
miR-4728	up	HHIP	down		0.0463541										1
miR-10b	down	POC1A	up		0.0266956										1
miR-4728	up	RNF157	down		0.171382										1
miR-940	up	EGF	down		0.218275										1
miR-143	down	SYT7	up		0.308086										1
miR-187	up	SLC19A3	down		0.310058										1
miR-4728	up	ACADL	down		0.141455										1
miR-155	up	TXNIP	down		0.164818										1
miR-584	down	TRIB3	up		0.259811										1
miR-6510	down	TPM3	up		0.203102										1
miR-551b	down	SLC7A5	up		0.644754										1
miR-96	up	SLC25A25	down		0.0954302										1
miR-4728	up	PDE7B	down		0.0445129										1
miR-4728	up	NOVA2	down		0.0544658										1
miR-1247	down	NME1-NME2	up		0.223821										1
miR-365b	down	TSPAN1	up		0.699266										1
miR-365a	down	TSPAN1	up		0.700567										1
miR-206	down	TSPAN1	up		0.319065										1
miR-365a	down	MCOLN2	up		0.180808										1
miR-365b	down	MCOLN2	up		0.17444										1
miR-4746	up	GPR75	down		0.236865										1
miR-190b	up	FOXN2	down		0.0513724										1
miR-21	up	FOXN2	down		0.441559										1
miR-3065	up	FOS	down		0.114729										1
miR-148b	up	EOGT	down		0.20258										1
miR-4732	down	ENTPD7	up		0.564319										1
miR-493	up	CRTAP	down		0.88324										1
miR-206	down	CERS2	up		0.274892										1
miR-140	down	CDC25A	up		-0.025062										1
miR-342	up	BMP2	down		0.160747										1
miR-141	up	ADRB1	down		0.738143										1
miR-206	down	SMKR1	up		0.0925368										1
miR-4728	up	CHRDL1	down		0.0239808										1
miR-342	up	CYP11A1	down		0.193717										1
miR-133b	down	EMID1	up		0.245942										1
miR-125b-2	down	MRPL12	up		-0.0116912										1
miR-139	down	FAM83H	up		0.329508										1
miR-1269b	up	SCD	down		0.220927										1
miR-4728	up	PKNOX2	down		0.283494										1
miR-4728	up	RASD1	down		0.318727										1
miR-4728	up	ARHGAP31	down		0.262883										1
miR-365b	down	PADI3	up		0.269746										1
miR-365a	down	PADI3	up		0.272305										1
miR-192	up	PPP1R3G	down		0.0563277										1
miR-3614	up	NPY4R	down		0.223992										1
miR-365b	down	DENND1B	up		0.423415										1
miR-365a	down	DENND1B	up		0.421904										1
miR-203a	up	DGAT2	down		0.497308										1
[truncated: 2,744 more rows]
