# Supplementary material for: Integrated Analysis of MicroRNA (miRNA) and mRNA Profiles Reveals Reduced Correlation between MicroRNA and Target Gene in Cancer
Source: Biomed Res Int. 2018 Dec 6;2018:1972606. doi: 10.1155/2018/1972606 (PMC6304515; doi:10.1155/2018/1972606)
Supplement: Supplementary Materials — Figure S1. Expression density distribution of mRNAs and miRNAs before and after filtering. Figure S2. Distribution of the PCC values of critical miRNA-target gene pairs in healthy controls and 4 clinically staged tumors. Figure S3: Simple correlations coefficients (Cor) and partial correlation coefficients (Pcor) of critical pairs in normal and tumor samples of LIHC. Figure S4: Simple correlations coefficients (Cor) and partial correlation coefficients (Pcor) of critical pairs in normal and tumor samples of LUAD. Figure S5: Simple correlations coefficients (Cor) and partial correlation coefficients (Pcor) of critical pairs in tumor samples of LIHC. Figure S6: Simple correlations coefficients (Pearson correlation coefficient) and partial correlation coefficients (given CNAs effects) of critical pairs in cancer samples of LUAD. Table S1: Sample sizes for each cancer type. Table S2. Sample clinical and grouping information for each cancer type. Table S3. List of DEMs for each cancer type. Table S4. List of DEGs for each cancer type. Table S5. Frequency of DEMs and DEGs in 11 cancer types. Table S6. List of critical miRNA-target gene pairs for each cancer type. Table S7: Interactional references and gene functional references for some critical miRNA-target pairs. Table S8. Frequency of critical miRNA-target pairs in 11 cancer types. Table S9. List of the significantly GO annotation terms (p < 0.05) for the critical target genes in each cancer type. Table S10. List of the significantly KEGG pathway terms (p < 0.05) for the critical target genes in each cancer type. Table S11. Partial and simple correlation coefficients for each critical pair in normal and tumor samples of LUAD and LIHC when controlling methylation or CNAs effect. [file 1972606.f1.zip › 1972606.f1/Table S9_BMRI_2598518.xlsx]

## Sheet: BLCA
Category	Term ID	Term Name	Count	%	PValue	Genes	List Total	Pop Hits	Pop Total	Fold Enrichment	Bonferroni	Benjamini	FDR
GOTERM_BP_DIRECT	GO:0006939	smooth muscle contraction	8	1.18694	1.79025e-06	EDNRA, SMTN, ROCK1, CHRM3, ROCK2, PDE4D, MYLK, HTR2A	610	18	16792	12.2346	0.00530828	0.00530828	0.00322036
GOTERM_BP_DIRECT	GO:0007517	muscle organ development	15	2.22552	3.64075e-06	MEF2A, EVC, USP2, FHL1, UTRN, SIRT1, LAMA2, MEF2D, BVES, SMTN, TAGLN, DMD, SGCD, MKX, SGCB	610	89	16792	4.63953	0.0107656	0.00539736	0.00654899
GOTERM_BP_DIRECT	GO:0071456	cellular response to hypoxia	15	2.22552	9.03929e-06	SLC8A1, CPEB2, RORA, PPARGC1A, SIRT1, KCNK3, KCNMB1, PTGIS, SLC2A4, SFRP1, BBC3, GATA6, BCL2, MPL, CCNA2	610	96	16792	4.30123	0.026516	0.00891797	0.0162592
GOTERM_BP_DIRECT	GO:0030198	extracellular matrix organization	22	3.26409	9.33443e-06	RECK, HAPLN1, ADAMTS20, CCDC80, ITGA1, HSPG2, ITGA3, ITGB3, SOX9, LAMA2, CSGALNACT1, ITGA9, SMOC2, LAMA4, COL19A1, CRISPLD2, ITGA5, FBLN5, FBN2, JAM2, FGF2, COL10A1	610	196	16792	3.08986	0.0273699	0.00691384	0.01679
GOTERM_BP_DIRECT	GO:0006468	protein phosphorylation	37	5.48961	1.08507e-05	FGFR1, NEK1, ERBB2, AKAP13, FER, PRKG1, LATS2, DMPK, CCNE1, STK40, BUB1, PRKAA2, PRKACB, CAMK2A, AKT3, PIK3R1, PRKCA, TNIK, SMAD9, ALPK3, ROCK1, ROCK2, TGFBR2, NPR1, PRKCB, RPS6KA5, PRKD1, KSR2, FYN, PLK1, HIPK3, MAPK4, RASSF2, CDC42BPA, LRRK2, MYLK, BMPR1A	610	456	16792	2.23362	0.0317446	0.00643111	0.0195172
GOTERM_BP_DIRECT	GO:0051209	release of sequestered calcium ion into cytosol	10	1.48368	1.26738e-05	HTR1B, JPH2, BBC3, PKD2, RYR2, ITPR3, RASA3, FGF2, ITPR1, HTR2A	610	41	16792	6.71411	0.0369785	0.00626024	0.022796
GOTERM_BP_DIRECT	GO:0001525	angiogenesis	23	3.41246	2.13707e-05	NRP2, PRKCA, FGFR1, CAV1, TBX4, HSPG2, APOLD1, FGF10, RORA, TNFSF12, NRXN1, VAV2, MCAM, SIRT1, PRKD1, MEOX2, CLIC4, CTGF, ITGA5, HIF3A, RHOB, TMEM100, WNT7A	610	223	16792	2.8392	0.0615595	0.00903548	0.038436
GOTERM_BP_DIRECT	GO:0086091	regulation of heart rate by cardiac conduction	9	1.33531	2.82563e-05	KCND3, CAV1, SCN1B, ANK2, SCN3B, CACNB2, KCNA5, KCNH2, CTNNA3	610	35	16792	7.07859	0.0805752	0.0104459	0.0508169
GOTERM_BP_DIRECT	GO:0007507	heart development	20	2.96736	3.82082e-05	NRP2, MEF2A, ALPK3, RBM20, ERBB2, TBX5, TGFBR2, PDLIM3, AKAP13, ITGA3, SRF, EDNRA, BVES, GATA5, KCNJ8, RPS6KA2, TRPS1, CC2D2A, PKD2, PKD1	610	183	16792	3.00851	0.107381	0.0125424	0.068709
GOTERM_BP_DIRECT	GO:0071560	cellular response to transforming growth factor beta stimulus	10	1.48368	5.73814e-05	CAV1, PDE2A, SFRP1, FYN, CLEC3B, SOX5, ABL1, SOX9, WNT7A, PPARGC1A	610	49	16792	5.61793	0.156841	0.0169153	0.103171
GOTERM_CC_DIRECT	GO:0005886	plasma membrane	208	30.8605	3.67098e-09	SGMS2, ATP1B2, SCN3B, IL6ST, UTRN, LPAR1, SYT7, PRKG1, AQP2, HTR1B, DIRAS1, ATP2B4, CTGF, RAB23, HCAR2, HCAR1, RECK, ROCK1, ROCK2, APOLD1, LIFR, COLEC12, RCC2, GPBAR1, RAB17, ROR2, RYR2, SLC2A12, GPR146, SLC2A13, CATSPERB, SCN1B, ERBB2, OAS3, AKAP12, CACNB2, KCNMB1, DMD, SERINC1, CNKSR2, TRPC1, KLF9, TGFBR2, MCAM, KCNK3, FNBP1, EPHA7, KCNJ6, SFRP1, KCNJ8, RGS5, IL5RA, PLAU, NRP2, GNAZ, JPH2, LDLR…	638	4121	18224	1.44173	1.66662e-06	1.66662e-06	5.21459e-06
GOTERM_CC_DIRECT	GO:0042383	sarcolemma	17	2.52226	3.44326e-08	KCND3, SLC8A1, KCNB1, UTRN, SSPN, LAMA2, ABCC9, PGM5, BVES, ANK2, KCNJ8, DMD, RYR2, SGCD, POPDC2, SYNM, SGCB	638	85	18224	5.71285	1.56323e-05	7.81616e-06	4.89111e-05
GOTERM_CC_DIRECT	GO:0005856	cytoskeleton	35	5.19288	3.25904e-07	DNAH9, KCNC3, WASF3, CALD1, FERMT2, UTRN, CABP1, AKAP12, FER, KLHL4, RAB3IP, SPRY2, KLHL5, ANK2, DMD, LRRFIP1, UBXN11, TNIK, ROCK1, FSCN1, KY, DPYSL2, CTNNA3, JMY, STOM, EPB41L2, FNBP1, TNS1, SMTN, PLEKHH2, CC2D2A, SNTG1, SGCD, OSBPL10, SGCB	638	371	18224	2.69474	0.00014795	4.9319e-05	0.000462943
GOTERM_CC_DIRECT	GO:0030018	Z disc	18	2.67062	7.33108e-07	SLC8A1, JPH2, SCN3B, PPP1R12B, PDLIM3, KY, SYNPO2, KCNA5, FLNA, PGM5, ATP2B4, ANK2, DMD, CFL2, MYZAP, PPP1R12A, RYR2, FBXO32	638	118	18224	4.35726	0.000332776	8.32043e-05	0.00104137
GOTERM_CC_DIRECT	GO:0048471	perinuclear region of cytoplasm	42	6.23145	7.76291e-05	SLC2A12, STK33, XRCC3, RAB3B, CAV1, USP2, GALNT6, ERBB2, MRVI1, CABP1, AKAP13, ZNF675, KCNA5, TNFSF12, CTIF, PRKAR2B, SLC2A4, CTGF, ARHGAP1, TMEM100, PRKACB, EHD2, PRKCA, SEC23A, HMGCLL1, TNIK, TPD52L1, CDC20, ITGA3, FLNA, RAD51, STOM, RAB11FIP4, TARBP2, EML1, PDE2A, CLIC4, TPPP, ABL1, KCNH2, APBB1, ARHGAP10	638	621	18224	1.93188	0.0346311	0.00702421	0.110215
GOTERM_CC_DIRECT	GO:0016010	dystrophin-associated glycoprotein complex	6	0.890208	0.000162785	PGM5, DMD, UTRN, SGCD, SSPN, SGCB	638	16	18224	10.7116	0.0712452	0.0122428	0.230986
GOTERM_CC_DIRECT	GO:0045211	postsynaptic membrane	20	2.96736	0.000162952	CNKSR2, CPEB3, MPDZ, KCNB1, GLRA3, PDLIM5, CABP1, UTRN, NLGN1, IGSF9B, SSPN, PJA2, EPHA7, P2RX1, CHRM3, ANK2, CHRM2, DMD, APBB1, KCTD12	638	211	18224	2.70751	0.0713156	0.0105138	0.231223
GOTERM_CC_DIRECT	GO:0043025	neuronal cell body	25	3.7092	0.00031657	CNKSR2, IL6ST, LPAR1, NRXN1, DPYSL2, IGSF9B, ITPR3, PPARGC1A, TMPRSS3, FLNA, CASP5, PRKAR2B, MYO10, EPHA7, CHRM2, KCNN3, RAB17, FBXO31, PTBP2, ABL1, MPL, LRRK2, APBB1, BMPR1A, HTR2A	638	315	18224	2.26701	0.133892	0.0178077	0.448746
GOTERM_CC_DIRECT	GO:0005938	cell cortex	14	2.07715	0.000372198	CAV1, KCNC3, USP2, CABP1, FERMT2, AKAP12, AKAP13, FER, PRKD1, MYO10, FNBP1, CTGF, MELK, COL10A1	638	123	18224	3.25122	0.155499	0.0186036	0.527406
GOTERM_CC_DIRECT	GO:0005901	caveola	10	1.48368	0.000409535	DLC1, CAV1, PTGIS, BVES, ATP2B4, TGFBR2, KCNA5, EHD2, BMPR1A, HTR2A	638	65	18224	4.3945	0.169699	0.0184249	0.58017
GOTERM_MF_DIRECT	GO:0044325	ion channel binding	18	2.67062	6.13636e-07	TRPC1, KCND3, CAV1, SLC8A1, SCN3B, FHL1, KCNB1, PDE4D, FLNA, RIMS3, ABCC9, ANK2, FYN, PKD2, PKD1, RYR2, LRRK2, KCNE4	611	113	16881	4.401	0.000473001	0.000473001	0.000937359
GOTERM_MF_DIRECT	GO:0005515	protein binding	367	54.451	3.41731e-05	DLC1, FAM110A, MEF2A, XRCC3, PDLIM7, ATP1B2, IL6ST, PDLIM5, LTBP4, STAT5B, UTRN, RUSC2, PDLIM3, FSTL1, RORA, DNAJB13, LPAR1, SYT7, PRKG1, SHE, AMOTL2, FAM124A, KIF13A, CCDC141, HTR1B, CDCA8, ATP2B4, CTGF, RAB23, PELI2, CCNA2, CDCA4, RAB27A, COL10A1, RECK, TNIK, ROCK1, ROCK2, MPDZ, LIFR, ZHX3, GEM, PPARGC1A, CTNNA3, UNC13D, PITPNM3, TAGLN, RCC2, LCA5, MAPK4, RAB17, RYR2, ROR2, SCN1B, LMNB1, NEK1, …	611	8785	16881	1.1542	0.0260038	0.0130875	0.0521886
GOTERM_MF_DIRECT	GO:0005509	calcium ion binding	47	6.97329	0.000120111	DCHS2, LDLR, LTBP4, CABP1, PCDHB15, FSTL1, CABP4, PCDHGC3, SYT7, PCDHGA2, MMP1, NECAB1, SMOC2, FAT3, GSN, PKD2, FBN2, EHD2, SLC8A1, SCUBE3, NCALD, SYT11, CPNE6, HSPG2, PCDH9, MGP, PCDH7, NRXN1, ITPR3, MMP13, ITPR1, RAB11FIP4, PITPNM2, EML1, PITPNM3, SNED1, PLSCR4, FBLN2, CLEC3B, FBLN5, RYR2, CACNA1E, SYT15, MELK, PLA2G2F, VLDLR, AOC3	611	717	16881	1.81107	0.0884523	0.0303988	0.183319
GOTERM_MF_DIRECT	GO:0003779	actin binding	24	3.56083	0.00020007	WASF3, NCALD, CALD1, PDLIM5, UTRN, FSCN1, SYNPO2, KLHL4, DAAM2, JMY, EPB41L2, CORO2B, KLHL5, SMTN, TNS1, TAGLN, GSN, PLEKHH2, DMD, SNTG1, MICAL1, LMOD1, LRRK2, MYLK	611	278	16881	2.38519	0.142959	0.0378332	0.305183
GOTERM_MF_DIRECT	GO:0046872	metal ion binding	104	15.4303	0.000410041	NT5DC3, DMPK, ATP2B4, ZNF107, ZNF106, COL10A1, KCND3, ROCK1, ROCK2, ZHX3, COLEC12, PDE4D, PITPNM2, PITPNM3, PDE5A, ROR2, CLIP1, NEK1, OAS3, AKAP13, AGMAT, ZNF695, MBNL3, PLAG1, ASXL3, SMAD9, KLF9, SYT11, KLF11, TGFBR2, ITGA1, ITGA3, ACACB, VAV2, ITGA9, PDE7B, ZFHX4, ITGA5, FREM1, TRPS1, ZIC5, CDC42BPA, JAZF1, ANTXR2, MYLK, ZMAT1, GNAZ, NRP2, ZNF488, GLRA3, SOBP, ZEB2, ZEB1, LATS2, SMPDL3B, ZNF681…	611	2069	16881	1.38877	0.271091	0.0612831	0.624531
GOTERM_MF_DIRECT	GO:0015278	calcium-release channel activity	5	0.74184	0.000454812	JPH2, RYR2, ITPR3, RASA3, ITPR1	611	11	16881	12.5584	0.295833	0.0567808	0.6925
GOTERM_MF_DIRECT	GO:0004674	protein serine/threonine kinase activity	28	4.1543	0.000572292	STK33, NEK1, PRKG1, LATS2, DMPK, STK40, BUB1, PRKACB, PRKAA2, CAMK2A, AKT3, PRKCA, TNIK, ALPK3, ROCK1, ROCK2, PRKCB, PRKD1, RPS6KA5, KSR2, RPS6KA2, PLK1, MAPK4, HIPK3, CDC42BPA, LRRK2, MELK, BMPR1A	611	376	16881	2.05744	0.356841	0.0611053	0.870647
GOTERM_MF_DIRECT	GO:0001968	fibronectin binding	6	0.890208	0.00212171	CTGF, CCDC80, ITGA3, ITGB3, SSC5D, IGFBP5	611	26	16881	6.3758	0.80555	0.185106	3.19241
GOTERM_MF_DIRECT	GO:0001077	transcriptional activator activity, RNA polymerase II core promoter proximal region sequence-specific binding	19	2.81899	0.00236908	PLAG1, MEF2A, SSBP2, TBX20, MITF, STAT5B, SIX4, SOX9, SRF, MEF2D, MEOX2, MYOCD, SIX1, TFAP2A, NFIC, MYB, TCF4, MYC, NFIB	611	236	16881	2.22433	0.839382	0.183878	3.55834
GOTERM_MF_DIRECT	GO:0008022	protein C-terminus binding	16	2.37389	0.00255546	MPDZ, ERBB2, HSPG2, CDC20, SIRT1, KCNK3, FOXN3, RAD51, ATXN1, HIC2, CTGF, FBLN5, SNTG1, ABL1, TBL1X, TCF4	611	182	16881	2.42888	0.86093	0.179038	3.8332

## Sheet: BRCA
Category	Term ID	Term Name	Count	%	PValue	Genes	List Total	Pop Hits	Pop Total	Fold Enrichment	Bonferroni	Benjamini	FDR
GOTERM_BP_DIRECT	GO:0051301	cell division	38	5.17007	6.28755e-08	KIFC1, AURKA, NR3C1, ANAPC11, TTC28, LLGL2, FAM83D, CCNE1, CDCA8, NCAPH, FIGN, OIP5, MIS18A, BUB1, SKA1, CCNO, CCNA2, CDCA4, CDCA3, ERCC6L, CDC7, KIF14, PARD6B, CDC6, DSN1, PSRC1, NUF2, CENPF, BIRC5, CDC20, MISP, TACC1, CDC25A, CCNB1, CCND1, MAD2L1, ZWINT, BUB1B	669	350	16792	2.72516	0.000203507	0.000203507	0.000114177
GOTERM_BP_DIRECT	GO:0000122	negative regulation of transcription from RNA polymerase II promoter	58	7.89116	5.6289e-07	MEF2C, CREBRF, PPARA, BACH2, THRB, EFNA1, E2F8, EZH2, PPARG, MITF, CBX4, FOXO1, ZEB2, CBX2, ZEB1, CBX8, KANK2, MYOCD, SOX17, TWIST1, SATB1, DAB2IP, SOX11, ESR1, LEF1, ESR2, PROX1, ASCL2, CCND1, UHRF1, CD36, SPDEF, ZFPM2, CAV1, HDGF, TRIB3, PRDM16, TCF7L2, ARX, TAL1, NPAS1, TCF21, BCL6, DNMT3B, TXNIP, BMP2, KLF10, FOXA1, KLF11, DLX2, PDE2A, PLK1, ID1, HOPX, ID4, LRP8, KLF4, VLDLR	669	720	16792	2.02196	0.00182042	0.000910623	0.00102216
GOTERM_BP_DIRECT	GO:0007062	sister chromatid cohesion	17	2.31293	2.93964e-06	CENPN, CENPM, DSN1, KIF18A, NUF2, CENPF, BIRC5, CDC20, CENPK, CDCA8, MAD2L1, PLK1, ZWINT, BUB1, BUB1B, SKA1, ERCC6L	669	103	16792	4.14274	0.00947049	0.00316685	0.00533801
GOTERM_BP_DIRECT	GO:0007067	mitotic nuclear division	27	3.67347	6.74617e-06	ANLN, AURKA, NR3C1, ANAPC11, TTC28, CEP55, FAM83D, FIGN, OIP5, MIS18A, BUB1, SKA1, CCNA2, ASPM, CDCA3, ERCC6L, CENPN, CDC6, NUF2, CENPF, BIRC5, CDC20, MISP, CDC25A, PLK1, BUB1B, CIT	669	248	16792	2.73268	0.0216007	0.00544448	0.0122498
GOTERM_BP_DIRECT	GO:0045669	positive regulation of osteoblast differentiation	12	1.63265	2.10555e-05	MEF2C, WNT7B, BMP2, IL6, SOX11, NPNT, IGF1, ID4, FBN2, RUNX2, DDR2, FGF2	669	60	16792	5.02003	0.0658865	0.013539	0.0382282
GOTERM_BP_DIRECT	GO:0045893	positive regulation of transcription, DNA-templated	41	5.57823	4.38341e-05	MEF2C, PPARA, FGF7, BLM, NDP, PPARG, MITF, FOXO1, PRDM16, CCNE1, TAL1, FOS, MRPL12, MYOCD, SOX17, EGF, RUNX2, CCNA2, FGF2, IL6, BMP2, SOX11, PSRC1, ESR1, BRCA2, IGF1, LEF1, ATAD2, FOXN2, CREB5, FZD2, ESR2, SIX4, HMGA1, FZD4, PROX1, FZD7, FOXN3, KLF2, BAMBI, KLF4	669	515	16792	1.99826	0.132287	0.0233716	0.0795693
GOTERM_BP_DIRECT	GO:0001570	vasculogenesis	11	1.4966	6.30383e-05	CAV1, ADM, MYOCD, TGFBR2, QKI, ZFPM2, SOX17, TMEM100, YAP1, FZD4, KDR	669	56	16792	4.93039	0.184588	0.0287308	0.114411
GOTERM_BP_DIRECT	GO:0045944	positive regulation of transcription from RNA polymerase II promoter	65	8.84354	6.35694e-05	MEF2C, PPARA, THRB, E2F5, FOXA3, EZH1, E2F8, PPARG, MITF, RHOQ, FOXO1, TLR4, ZEB2, ZEB1, FOS, NOD2, MYOCD, YAP1, SOX17, FGF2, TWIST1, EGFR, DAB2IP, SOX11, OTX1, ESR1, SIX3, DMRT2, LEF1, NCOA7, GRHL3, SIX4, DDN, PROX1, HMGA1, UHRF1, SPDEF, ZFPM2, NR3C1, TCF7L2, TAL1, TCF21, MEIS3, GBX2, TEF, PKD2, BMP2, IL6, KAT2B, FOXA1, ATAD2, IGF1, EN2, LMX1A, FZD5, DLX3, PAGR1, DLX2, HOXB1, RPS6KA3, NME1-NME2,…	669	981	16792	1.66311	0.185988	0.0253946	0.115374
GOTERM_BP_DIRECT	GO:0008283	cell proliferation	32	4.35374	6.48275e-05	STIL, TSPAN1, ERBB2, NDP, E2F8, HDGF, ZEB1, TCF7L2, TRAIP, MIF, ISG20, FAM83D, TYMS, ZFP36L2, PAK4, BUB1, YAP1, EGFR, MKI67, KLF10, DLGAP5, CENPF, IGF1, TACC1, CDC25A, UHRF1, PLK1, BUB1B, TCF19, MPL, EMP1, MELK	669	366	16792	2.19455	0.189297	0.0230473	0.117656
GOTERM_BP_DIRECT	GO:0006260	DNA replication	18	2.44898	0.000149134	CDC7, CDC6, BLM, TICRR, DTL, GINS4, BRIP1, IGF1, CHEK1, RMI1, CDC25A, RFC4, CHTF18, EGF, ORC1, CHAF1B, FEN1, BARD1	669	155	16792	2.91486	0.382937	0.0471315	0.27047
GOTERM_CC_DIRECT	GO:0051233	spindle midzone	7	0.952381	5.6428e-05	KIF14, CDC6, CDCA8, PLK1, BUB1B, AURKA, RACGAP1	703	19	18224	9.55065	0.0263381	0.0263381	0.080594
GOTERM_CC_DIRECT	GO:0005886	plasma membrane	202	27.483	9.26974e-05	SYT1, CADM2, EFNA1, UTRN, NPY4R, SYT9, SYT7, ATP2B4, KCNK9, KCNK6, OSCAR, ADAM8, HCAR2, RECK, DAB2IP, TTC7B, APOLD1, LIFR, SPIRE2, SIRPA, PLAUR, KRT19, VSIG1, CD36, F3, RALGPS2, EMCN, CLCN2, ENPP2, ERBB2, AKAP12, CACNB3, AFAP1L1, KCNJ3, KCNMB1, SLC29A4, DMD, CNKSR2, GPR158, KLF9, ARHGEF39, CFB, EPM2A, TGFBR2, CELSR3, GAS1, KCNK1, MCAM, KDR, ATP13A4, ABCG8, KCNJ6, AVPR1A, CHRNB4, KCNJ16, MARCKSL1,…	703	4121	18224	1.27068	0.0429005	0.0216854	0.132364
GOTERM_CC_DIRECT	GO:0030496	midbody	16	2.17687	0.0001338	KIF14, KIF23, PSRC1, CENPF, BIRC5, AURKA, TTC28, CEP55, RACGAP1, ECT2, TACC1, RAB11FIP4, CDCA8, PLK1, ASPM, KIF20A	703	129	18224	3.21528	0.0613302	0.0208762	0.191003
GOTERM_CC_DIRECT	GO:0043235	receptor complex	15	2.04082	0.000386975	PTPRB, EGFR, ADCYAP1R1, ERBB2, TGFBR2, LIFR, NPR1, PIGR, GPR37L1, ABCG8, TGFBR3, LRP8, KCTD16, EGF, VLDLR	703	127	18224	3.06179	0.167294	0.044737	0.55149
GOTERM_CC_DIRECT	GO:0005923	bicellular tight junction	13	1.76871	0.00137208	CLDN7, PARD6B, CLMP, ADCYAP1R1, CRB3, EPB41L4B, FZD5, ECT2, AMOTL2, CLDN14, CCND1, USP53, TJP3	703	113	18224	2.98231	0.477662	0.121806	1.94265
GOTERM_CC_DIRECT	GO:0000775	chromosome, centromeric region	9	1.22449	0.00145053	CENPN, CDCA8, MKI67, HJURP, OIP5, MIS18A, NUF2, CENPF, BIRC5	703	57	18224	4.09313	0.496715	0.108128	2.05266
GOTERM_CC_DIRECT	GO:0000777	condensed chromosome kinetochore	11	1.4966	0.00186213	CENPN, CENPM, MAD2L1, HJURP, ZWINT, NUF2, BUB1, BUB1B, BIRC5, CENPK, ERCC6L	703	87	18224	3.27764	0.585883	0.118336	2.62794
GOTERM_CC_DIRECT	GO:0009986	cell surface	36	4.89796	0.00202907	KCNC1, PPFIA4, CPM, ADCYAP1R1, NDP, FERMT2, TLR4, PDIA4, HMMR, MIF, NOD2, DMD, MSLN, SLC39A6, HHIP, ADAM8, ANO6, EGFR, LPL, BMP2, CLMP, ITGA1, FZD5, FZD4, ADIPOQ, SLC7A11, ADAMTS9, CD36, THBD, TNS1, PRLR, F3, TGFBR3, MPL, PRNP, KCNH2	703	542	18224	1.72184	0.617385	0.11316	2.86038
GOTERM_CC_DIRECT	GO:0008076	voltage-gated potassium channel complex	11	1.4966	0.00203007	KCNJ16, KCNC1, KCNQ5, STX1A, KCNJ6, KCNT2, KCNK6, KCNH2, KCNK1, KCNJ3, KCNMB1	703	88	18224	3.2404	0.617566	0.101294	2.86176
GOTERM_CC_DIRECT	GO:0005856	cytoskeleton	27	3.67347	0.0025272	GAS2L3, PTPN7, DNAH9, WASF3, UTRN, FERMT2, AKAP12, KY, SPIRE2, FRMPD3, EPB41L4B, MISP, CTNNA3, SLC7A11, TPM3, FRMD3, EPB41L2, SPRY2, MAST1, NOD2, TNS1, DMD, AKAP5, FAM83H, DST, FGD3, SGCB	703	371	18224	1.88659	0.697864	0.112803	3.55085
GOTERM_MF_DIRECT	GO:0005242	inward rectifier potassium channel activity	7	0.952381	8.38722e-05	KCNJ16, KCNQ5, KCNJ6, KCNK6, KCNH2, KCNK1, KCNJ3	660	20	16881	8.95205	0.0713861	0.0713861	0.130334
GOTERM_MF_DIRECT	GO:0008017	microtubule binding	21	2.85714	0.000193485	GAS2L3, KIFC2, KIF14, KIF23, RP1, KIFC1, KIF24, PSRC1, KIF18A, DPYSL5, BIRC5, REEP1, RACGAP1, FAM83D, PLK1, NEFH, SKA1, JAKMIP2, PRNP, MAP6D1, KIF20A	660	208	16881	2.58232	0.157064	0.0818845	0.300428
GOTERM_MF_DIRECT	GO:0003682	chromatin binding	31	4.21769	0.000346552	MEF2C, TICRR, EZH1, EZH2, PPARG, CBX4, FOXO1, CBX2, ZEB1, ARX, TAL1, FOS, MEIS3, BCL6, YAP1, POLQ, ORC1, DNMT3B, RUNX2, EGFR, SATB1, KAT2B, ESR1, ATAD2, LEF1, CENPF, HMGA1, RAD51, DLX3, DLX2, CHAF1B	660	391	16881	2.02787	0.263656	0.0969881	0.537499
GOTERM_MF_DIRECT	GO:0019901	protein kinase binding	30	4.08163	0.000397509	CAV1, UTRN, TRIB3, AURKA, CACNB3, TCF7L2, FAM83D, CCNE1, SPRY2, NOD2, SYN1, NEFH, FAM83H, CCNA2, EGFR, KIF14, SASH1, DAB2IP, KAT2B, EEF1A2, NPR1, RACGAP1, FZD5, CDC25A, CCNB1, RPS6KA3, CCND1, PLK1, GRB7, KIF20A	660	376	16881	2.04074	0.296066	0.0840263	0.616305
GOTERM_MF_DIRECT	GO:0030165	PDZ domain binding	12	1.63265	0.000504275	KIF14, SHISA9, ADRB1, ATP2B4, TGFBR3, FZD2, CIT, SLC9A3R1, FZD4, FZD7, CRIM1, LLGL2	660	86	16881	3.56892	0.359424	0.0852252	0.781229
GOTERM_MF_DIRECT	GO:0005515	protein binding	383	52.1088	0.00105704	MEF2C, DLC1, SYT1, RP1, EFNA1, UTRN, LDHD, FSTL1, AURKA, SYT7, AMOTL2, FAM124A, USP53, CDCA8, ATP2B4, MIS18A, MAP3K8, RAB26, ADAM8, CCNA2, CDCA4, TWIST1, CDCA3, RECK, TYRO3, PPP1R37, ACAA2, DAB2IP, PLD1, TTC7B, CDHR2, LIFR, DEPDC1, MAGED2, PROX1, CTNNA3, PLAUR, RND3, KRT19, UHRF1, CD36, MAD2L1, RFC4, NAV2, ZWINT, F3, ZNF239, ADAMTS5, SCGB2A2, RBP7, LMNB1, TICRR, ERBB2, AKAP12, CHEK1, IGF2BP3, AFA…	660	8785	16881	1.11509	0.606965	0.144135	1.63101
GOTERM_MF_DIRECT	GO:0008134	transcription factor binding	22	2.9932	0.00393331	PPARA, KAT2B, E2F5, FOXA3, ENPP2, FOXA1, PPARG, ESR1, LEF1, CENPF, ZEB1, HDAC11, HMGA1, TCF7L2, FOS, CCND1, MYOCD, ID1, HES2, ZFPM2, SOX17, TWIST1	660	284	16881	1.98134	0.969191	0.391731	5.944
GOTERM_MF_DIRECT	GO:0008201	heparin binding	15	2.04082	0.00404762	LPL, FMOD, FGF7, CCDC80, HDGF, FSTL1, SOD3, APLP1, PCOLCE2, NAV2, TGFBR3, LAMC2, FGF2, PLA2G5, ADAMTS5	660	160	16881	2.39787	0.972161	0.36088	6.11169
GOTERM_MF_DIRECT	GO:0043565	sequence-specific DNA binding	34	4.62585	0.00414805	CREBRF, PPARA, THRB, FOXA3, PPARG, FOXO1, NR3C1, PRDM16, TCF7L2, FOS, MEIS3, HOXA3, TEF, BCL6, MKX, SPIB, SOX17, OTX1, FOXA1, ESR1, LEF1, DMRT2, FOXN2, CREB5, GRHL3, EN2, SIX4, ESR2, FOXN3, DLX3, HOXB1, CSRNP3, SPDEF, KLF2	660	518	16881	1.67882	0.974532	0.334899	6.25879
GOTERM_MF_DIRECT	GO:0008013	beta-catenin binding	10	1.36054	0.00460828	AMER2, ESR1, FOXO1, LEF1, SOX17, SLC9A3R1, TCF7L2, KLF4, KANK1, CTNNA3	660	82	16881	3.11918	0.983067	0.334922	6.93015

## Sheet: HNSC
Category	Term ID	Term Name	Count	%	PValue	Genes	List Total	Pop Hits	Pop Total	Fold Enrichment	Bonferroni	Benjamini	FDR
GOTERM_BP_DIRECT	GO:0051301	cell division	23	6.78466	6.20557e-07	CDK1, CCNF, KIF18B, AURKA, BIRC5, CDC20, CDK6, CCNG1, CCNG2, MCM5, CDC25B, CCNB1, CCNE1, KIF2C, SPC25, NDE1, OIP5, BUB1, CDCA2, HAUS8, UBE2S, CCNA2, CDCA4	311	350	16792	3.54815	0.00119572	0.00119572	0.00106236
GOTERM_BP_DIRECT	GO:0007067	mitotic nuclear division	19	5.60472	8.62722e-07	CENPN, CDK1, CCNF, BIRC5, AURKA, CDC20, AURKB, CEP55, CCNG1, CCNG2, CDC25B, KIF2C, SPC25, OIP5, CDCA2, BUB1, HAUS8, CCNA2, TUBB3	311	248	16792	4.1366	0.00166195	0.000831319	0.00147694
GOTERM_BP_DIRECT	GO:0006260	DNA replication	14	4.12979	6.14908e-06	EXO1, CLSPN, CDK1, DTL, IGF1, NFIX, CHEK1, MCM4, MCM5, CDT1, CHTF18, FEN1, NFIA, NFIB	311	155	16792	4.87684	0.0117855	0.00394403	0.0105265
GOTERM_BP_DIRECT	GO:0045944	positive regulation of transcription from RNA polymerase II promoter	37	10.9145	6.54174e-05	MEF2C, ONECUT1, ELF4, E2F7, MITF, ATP1B4, FSTL3, PAX5, NFIX, MYBL1, GREM1, MYBL2, HOXD10, JADE1, FOS, RGMA, OSR1, MYOCD, POU2F2, SERPINE1, HOXA10, IL1B, TOP2A, IL1A, AR, SSBP2, MLXIPL, IGF1, ATAD2, EN2, CSRNP3, HIF3A, PBX1, FOXC1, WNT7A, NFIA, NFIB	311	981	16792	2.03645	0.118499	0.0310402	0.111933
GOTERM_BP_DIRECT	GO:0007062	sister chromatid cohesion	10	2.94985	0.000121786	CENPN, KIF2C, SPC25, NDE1, CENPA, BUB1, BIRC5, CDC20, AURKB, CENPK	311	103	16792	5.24209	0.209284	0.0458777	0.208288
GOTERM_BP_DIRECT	GO:0030199	collagen fibril organization	6	1.76991	0.000714419	COL14A1, COL12A1, FOXC1, GREM1, SERPINH1, COL5A2	311	39	16792	8.3067	0.747891	0.205187	1.21604
GOTERM_BP_DIRECT	GO:0009954	proximal/distal pattern formation	5	1.47493	0.000904157	HOXA10, HOXA9, PBX1, GREM1, HOXD10	311	24	16792	11.2487	0.825181	0.220532	1.53665
GOTERM_BP_DIRECT	GO:0010628	positive regulation of gene expression	14	4.12979	0.00121237	MEF2C, CDK1, AR, FGFR4, MITF, ITGA3, CDK6, KIT, IL7R, HMGN5, SPRY2, OSR1, IL1B, IL1A	311	262	16792	2.88515	0.903564	0.2535	2.05538
GOTERM_BP_DIRECT	GO:0050900	leukocyte migration	9	2.65487	0.00192506	SLC16A1, PROCR, MMP9, F2, ITGA3, TREM1, SLC7A5, SELE, SLC7A11	311	122	16792	3.98313	0.975647	0.338197	3.24498
GOTERM_BP_DIRECT	GO:0007519	skeletal muscle tissue development	6	1.76991	0.00243456	MEF2C, DMD, CFL2, KLHL31, MYH14, HOXD10	311	51	16792	6.35218	0.990901	0.374969	4.08708
GOTERM_CC_DIRECT	GO:0009986	cell surface	25	7.37463	3.39111e-05	TF, MICB, PPFIA4, CLU, GREM1, RGMA, SLC1A2, PROCR, FOLR1, DMD, UNC5D, HLA-A, LY6K, ITGA3, ADIPOQ, TPBG, SLC7A11, TNS1, TFRC, NLGN4X, ULBP2, TGFBR3, PTGFRN, PRNP, WNT7A	321	542	18224	2.61866	0.0109943	0.0109943	0.0458797
GOTERM_CC_DIRECT	GO:0005654	nucleoplasm	73	21.5339	0.000364994	KIF23, MEF2C, CLSPN, KYNU, XRCC3, XRCC2, ELF4, TNNC1, E2F7, MITF, FSTL3, AURKA, CBX2, AURKB, HMGN5, GTF2IRD2B, CDT1, FOS, CCNE1, JADE1, SPRY1, OIP5, CDCA2, HADH, TOP2A, CCNA2, CDK1, SATB1, AR, DTL, MLXIPL, CDK6, DEPDC1, MCM4, MCM5, FOXC1, KPNA2, FGFR4, PPP1R12B, NR3C2, MKNK2, CHEK1, CCNG1, MYBL2, TYMS, CENPA, POU2F2, SYBU, BUB1, ACTL6A, TRIP10, POLQ, FEN1, EXO1, CENPN, HIST1H2BD, KLF9, HIST1H2BE,…	321	2784	18224	1.48865	0.112201	0.0577691	0.492792
GOTERM_CC_DIRECT	GO:0005615	extracellular space	41	12.0944	0.000753275	TF, C3, MMP9, CLU, FSTL3, CHEK1, KIT, GREM1, CXCL12, GREM2, SERPINH1, PCSK2, SERPINE2, COL7A1, SCRG1, IFNE, ANG, SERPINE1, IL1B, COL12A1, PDGFD, IL1A, BMP3, HIST1H2BD, HIST1H2BE, IGF1, MMP13, ADIPOQ, LEFTY1, WNT7B, COL14A1, TFRC, CFL2, F2, ULBP2, NLGN4X, FJX1, TGFBR3, CTSC, WNT7A, SELE	321	1347	18224	1.72804	0.217812	0.0786237	1.01456
GOTERM_CC_DIRECT	GO:0000788	nuclear nucleosome	6	1.76991	0.00100226	HIST1H2BD, HIST1H2BE, CENPA, HIST1H3B, HIST1H3G, HIST1H3H	321	44	18224	7.74172	0.278843	0.0784744	1.34779
GOTERM_CC_DIRECT	GO:0005813	centrosome	18	5.30973	0.0014999	KIF23, CDK1, XRCC2, DTL, AURKA, CHEK1, CDC20, CDK6, CEP55, CDC25B, RTTN, CCNB1, NDE1, SLC16A1, PROCR, TRIM59, CKAP2L, HAUS8	321	426	18224	2.39884	0.386966	0.0932304	2.01074
GOTERM_CC_DIRECT	GO:0005871	kinesin complex	6	1.76991	0.00232935	KIF23, KIF1C, KIF2C, NDE1, KIF6, KIF18B	321	53	18224	6.42709	0.532453	0.11901	3.10655
GOTERM_CC_DIRECT	GO:0032133	chromosome passenger complex	3	0.884956	0.00296792	AURKA, BIRC5, AURKB	321	5	18224	34.0636	0.62053	0.129272	3.94243
GOTERM_CC_DIRECT	GO:0005874	microtubule	14	4.12979	0.00353531	KIF23, DNAH9, KIF18B, AURKA, BIRC5, TRIM63, KIF1C, SPRY2, KIF2C, NDE1, KIF6, SYBU, HAUS8, TUBB3	321	311	18224	2.55568	0.684801	0.134388	4.67953
GOTERM_CC_DIRECT	GO:0000777	condensed chromosome kinetochore	7	2.0649	0.00429291	CENPN, KIF2C, SPC25, NDE1, BUB1, BIRC5, CENPK	321	87	18224	4.56791	0.754019	0.144298	5.65557
GOTERM_CC_DIRECT	GO:0030018	Z disc	8	2.35988	0.00483098	ANK1, DMD, CFL2, PPP1R12B, KY, TRIM63, MYOZ3, JPH1	321	118	18224	3.84899	0.79376	0.14604	6.34315
GOTERM_MF_DIRECT	GO:0001077	transcriptional activator activity, RNA polymerase II core promoter proximal region sequence-specific binding	17	5.01475	5.43727e-06	MEF2C, AR, SSBP2, ONECUT1, ELF4, MITF, PAX5, MYBL1, MYBL2, FOS, MYOCD, POU2F2, HOXA10, PBX1, TLX1, NFIA, NFIB	302	236	16881	4.0265	0.00272579	0.00272579	0.007834
GOTERM_MF_DIRECT	GO:0000978	RNA polymerase II core promoter proximal region sequence-specific DNA binding	18	5.30973	0.000226386	MEF2C, AR, SSBP2, ELF4, MITF, MLXIPL, PAX5, MYBL1, MYBL2, FOS, ZNF695, POU2F2, HOXA10, PBX1, ACTL6A, TLX1, NFIA, NFIB	302	355	16881	2.83423	0.107438	0.0552448	0.325694
GOTERM_MF_DIRECT	GO:0008307	structural constituent of muscle	6	1.76991	0.000863825	MYBPC1, DMD, MYH11, SYNM, JPH1, TPM1	302	42	16881	7.98534	0.351976	0.13464	1.23746
GOTERM_MF_DIRECT	GO:0031492	nucleosomal DNA binding	6	1.76991	0.00131354	CENPA, HIST1H3B, ACTL6A, HMGN5, HIST1H3G, HIST1H3H	302	46	16881	7.29096	0.483061	0.15207	1.87603
GOTERM_MF_DIRECT	GO:0003682	chromatin binding	17	5.01475	0.00182536	EXO1, MEF2C, SATB1, CDK1, AR, TSHZ2, ATAD2, CBX2, HMGN5, MCM5, HOXD10, FOS, CENPA, ACTL6A, POLQ, TOP2A, NFIA	302	391	16881	2.43032	0.600351	0.167593	2.59813
GOTERM_MF_DIRECT	GO:0051015	actin filament binding	9	2.65487	0.00254339	MYO10, TNNC1, CFL2, FSCN1, SCIN, MYH11, CACNB2, MYH14, TPM1	302	132	16881	3.81118	0.72152	0.191899	3.60281
GOTERM_MF_DIRECT	GO:0003774	motor activity	6	1.76991	0.00641856	KIF1C, MYO10, DNAH9, MYH11, KIF18B, MYH14	302	66	16881	5.08158	0.960541	0.369843	8.86059
GOTERM_MF_DIRECT	GO:0005515	protein binding	179	52.8024	0.00744306	MEF2C, XRCC3, XRCC2, RAB9B, TNNC1, MMP9, LDHD, FSTL3, CBX2, AURKA, AURKB, TLR6, CRY2, ANK1, SERPINE2, MYOCD, OIP5, SLC25A23, SERPINE1, TRAK1, CCNA2, CDCA4, IL1A, RECK, SATB1, EMX1, DTL, EFNB1, SOCS1, EMX2, HLA-A, GTF2IRD2, LIFR, DEPDC1, PKIA, TNS1, F2, CD300LG, PTGFRN, TSHZ2, FGFR4, GNE, CLU, CACNB2, CHEK1, IGF2BP3, TRIM72, ASB16, MYBL2, CCNG1, GREM1, SESN1, TK1, HADHB, SPC25, UBE2D4, PROCR, ZNF6…	302	8785	16881	1.13894	0.976491	0.374247	10.2053
GOTERM_MF_DIRECT	GO:0005524	ATP binding	40	11.7994	0.0103558	KIF23, XRCC3, DNAH9, FGFR4, XRCC2, GNE, MKNK2, AURKA, CHEK1, KIT, AURKB, ABCA6, TK1, KIF2C, UBE2D4, ACSL1, KIF6, PAK3, BUB1, POLQ, TOP2A, ATP8B3, TRIP13, NWD1, CDK1, ALPK3, ATAD2, KIF18B, CDK6, PFKM, MCM4, MCM5, KIF1C, MYO10, KCNT2, MYH11, CHTF18, MYH14, UBE2S, PCCA	302	1495	16881	1.49558	0.994624	0.440459	13.9284
GOTERM_MF_DIRECT	GO:0005125	cytokine activity	9	2.65487	0.0137961	BMP3, IFNE, IL1B, GREM1, WNT7A, ADIPOQ, GREM2, IL1A, LEFTY1	302	176	16881	2.85839	0.999064	0.502114	18.1404

## Sheet: KICH
Category	Term ID	Term Name	Count	%	PValue	Genes	List Total	Pop Hits	Pop Total	Fold Enrichment	Bonferroni	Benjamini	FDR
GOTERM_BP_DIRECT	GO:0045669	positive regulation of osteoblast differentiation	7	2.81124	0.000167015	SOX11, IGF1, GNAS, FBN2, TMEM119, FGF2, BMP6	231	60	16792	8.48081	0.246188	0.246188	0.28117
GOTERM_BP_DIRECT	GO:0008283	cell proliferation	15	6.0241	0.000540018	E2F8, MET, PIM1, HDGF, IGF1, TBX1, AURKB, STAT3, KIF2C, EPS8, INSIG1, LIPG, BUB1B, H3F3B, EMP2	231	366	16792	2.97921	0.599065	0.366806	0.906441
GOTERM_BP_DIRECT	GO:0016337	single organismal cell-cell adhesion	7	2.81124	0.00265774	EMCN, COL19A1, PKP1, PKHD1, ITGA8, FBLIM1, NEGR1	231	101	16792	5.0381	0.988923	0.777084	4.38708
GOTERM_BP_DIRECT	GO:0032466	negative regulation of cytokinesis	3	1.20482	0.00374886	E2F7, E2F8, AURKB	231	7	16792	31.154	0.998262	0.795819	6.1352
GOTERM_BP_DIRECT	GO:0006468	protein phosphorylation	15	6.0241	0.00427449	CCNE1, SGK1, SMAD9, CAMK4, FASTK, MYLK3, PHKA1, PIM1, TRIB3, BUB1B, WNK3, WNK2, AURKB, LRRK2, PRKCD	231	456	16792	2.39121	0.999288	0.765333	6.96655
GOTERM_BP_DIRECT	GO:0006805	xenobiotic metabolic process	6	2.40964	0.00433061	ACSM2B, ACY1, HNF4A, SULT1B1, CYP1A2, AOC3	231	78	16792	5.59174	0.999353	0.705914	7.0549
GOTERM_BP_DIRECT	GO:0032091	negative regulation of protein binding	5	2.00803	0.00768081	CAV1, SORL1, AURKB, LRRK2, PRKCD	231	57	16792	6.37655	0.999998	0.844907	12.1885
GOTERM_BP_DIRECT	GO:0050679	positive regulation of epithelial cell proliferation	5	2.00803	0.00918587	OSR1, IGF1, TBX1, FOXP1, BMP6	231	60	16792	6.05772	1	0.85798	14.4069
GOTERM_BP_DIRECT	GO:0045717	negative regulation of fatty acid biosynthetic process	3	1.20482	0.0112624	APOC3, INSIG1, TRIB3	231	12	16792	18.1732	1	0.881084	17.381
GOTERM_BP_DIRECT	GO:0030501	positive regulation of bone mineralization	4	1.60643	0.0120218	OSR1, FBN2, TMEM119, BMP6	231	35	16792	8.30773	1	0.870804	18.4444
GOTERM_CC_DIRECT	GO:0005887	integral component of plasma membrane	33	13.253	0.0017484	CAV1, GABRB2, GABRB1, ADCYAP1R1, SORL1, KCNJ10, KCNA5, SLC7A5, GRID2, FUT1, SLCO3A1, KLRF1, GOLM1, PTPRB, CR1, PODXL, MET, MMP16, SSPN, CNGA4, IGSF6, NTRK3, ATP6V1A, BSND, EPHA7, VSIG2, SSTR3, ADRB1, NLGN4X, HAS2, TM4SF1, SLC38A1, PTGDR2	240	1415	18224	1.77088	0.377636	0.377636	2.27585
GOTERM_CC_DIRECT	GO:0016021	integral component of membrane	87	34.9398	0.00584053	SLC9A7, SC5D, GABRB2, GREB1, SLC22A15, GABRB1, CYC1, SORL1, TMEM161B, ATP10D, KCNJ10, SLC7A5, C14ORF2, ATCAY, CPOX, INSIG1, GRID2, SEMA3D, MUC15, LRRC4, ACSM2B, SIGLEC10, ADIPOR2, HRK, CYP1A2, OXGR1, SIGLEC15, SIRPA, MYADM, LILRB1, IGSF6, TMEM65, NNT, PITPNM3, LAX1, BACE2, LSAMP, SLC38A1, TM4SF1, SNX13, EMP2, CLN8, AOC3, GALNT3, ORAI2, EMCN, CAV1, PKHD1, ADCYAP1R1, PPM1A, PAQR7, ITM2C, KCNS2, TME…	240	5163	18224	1.27953	0.795548	0.547837	7.41671
GOTERM_CC_DIRECT	GO:0030054	cell junction	14	5.62249	0.00777904	STON2, LRRC4, ARHGAP21, ATCAY, EPS8, GABRB2, GABRB1, CPEB4, NLGN4X, SCIN, GRID2, SSPN, LRRK2, SYNGR3	240	459	18224	2.31605	0.879531	0.506116	9.76373
GOTERM_CC_DIRECT	GO:0005901	caveola	5	2.00803	0.0104579	CAV1, ADCYAP1R1, AKAP6, KCNA5, EMP2	240	65	18224	5.84103	0.942098	0.509462	12.9167
GOTERM_CC_DIRECT	GO:0070062	extracellular exosome	50	20.0803	0.0207639	RHOJ, GREB1, GABRB2, SORL1, SLC7A5, BBOX1, NEGR1, DDAH1, GOLM1, SIRPA, MYADM, PRKCD, PCOLCE2, ATP6V1A, G6PD, CAMK4, SCIN, TOM1, GNAS, SLC38A1, LRRK2, XYLB, GALNT3, RAB3B, SORD, HIST1H2AG, PKHD1, PPIL1, C1R, AGMAT, ITM2C, ITGB8, TMEM33, APOC3, FAM162A, NDUFA4, CR1, C11ORF54, ACY1, PODXL, TMC5, ATAD2, COL5A3, XPNPEP2, EPS8, SRSF7, PKP1, CALM3, H3F3B, HIST1H3H	240	2811	18224	1.35065	0.996608	0.6793	24.1217
GOTERM_CC_DIRECT	GO:0045211	postsynaptic membrane	8	3.21285	0.0215231	LRRC4, EPHA7, GABRB2, GABRB1, CPEB4, NLGN4X, GRID2, SSPN	240	211	18224	2.87899	0.997251	0.625716	24.892
GOTERM_CC_DIRECT	GO:0008076	voltage-gated potassium channel complex	5	2.00803	0.0285855	KCNQ5, ABCC9, KCNS2, CALM3, KCNA5	240	88	18224	4.31439	0.999614	0.67463	31.7192
GOTERM_CC_DIRECT	GO:0043005	neuron projection	8	3.21285	0.0374611	STON2, ATCAY, SSTR3, ADCYAP1R1, CPEB4, WRN, LRRK2, PTGDR2	240	237	18224	2.56315	0.999968	0.725657	39.486
GOTERM_CC_DIRECT	GO:0005886	plasma membrane	67	26.9076	0.03953	RHOJ, SLC9A7, GABRB2, GABRB1, KNTC1, ATP10D, KCNJ10, SLC7A5, KCNQ5, TIAM1, GRID2, MUC15, NEGR1, SGK1, SIGLEC10, PIM1, SPIRE1, MMP16, WNK2, OXGR1, MYADM, PRKCD, SIRPA, SIGLEC15, LILRB1, ATP6V1A, BSND, TMEM65, SSTR3, ADRB1, LAX1, LSAMP, GNAS, SLC38A1, LRRK2, EMP2, PTGDR2, AOC3, EMCN, CAV1, RAB3B, ADCYAP1R1, PHKA1, TRIB3, PAQR7, KCNA5, ITM2C, KCNS2, ITGB8, LGSN, SLCO3A1, KLRF1, CR1, PODXL, MET, FZD1…	240	4121	18224	1.23454	0.999982	0.703129	41.175
GOTERM_CC_DIRECT	GO:0005783	endoplasmic reticulum	18	7.22892	0.0451792	PLA2G16, CAV1, CPEB4, SORL1, ATP10D, KCNA5, PRKCD, A1CF, CERS2, TMEM33, EMID1, DHCR7, BACE2, ITGA8, INSIG1, LRRK2, CLN8, AOC3	240	828	18224	1.65072	0.999996	0.714318	45.5675
GOTERM_MF_DIRECT	GO:0019901	protein kinase binding	13	5.22088	0.00327424	CAV1, PFKFB2, EEF1A2, TRIB3, KCNA5, PRKCD, STAT3, CCNE1, OSR1, LAX1, GATA6, CALM3, EMP2	216	376	16881	2.70209	0.776598	0.776598	4.55599
GOTERM_MF_DIRECT	GO:0030145	manganese ion binding	5	2.00803	0.00372703	GALNT3, PIM1, PPM1A, WRN, B4GALT7	216	50	16881	7.81528	0.818488	0.573958	5.17061
GOTERM_MF_DIRECT	GO:0045155	electron transporter, transferring electrons from CoQH2-cytochrome c reductase complex and cytochrome c oxidase complex activity	2	0.803213	0.025311	CYC1, CYCS	216	2	16881	78.1528	0.999992	0.979866	30.5463
GOTERM_MF_DIRECT	GO:0042923	neuropeptide binding	3	1.20482	0.0263858	SSTR3, ADCYAP1R1, PTGDR2	216	20	16881	11.7229	0.999995	0.95288	31.6274
GOTERM_MF_DIRECT	GO:0000979	RNA polymerase II core promoter sequence-specific DNA binding	4	1.60643	0.0360605	HNF4A, GATA6, SOX11, H3F3B	216	57	16881	5.48441	1	0.965154	40.678
GOTERM_MF_DIRECT	GO:0046983	protein dimerization activity	6	2.40964	0.043076	E2F2, HEY1, TBX1, DAO, HES7, STAT3	216	150	16881	3.12611	1	0.965046	46.5299
GOTERM_MF_DIRECT	GO:0004674	protein serine/threonine kinase activity	10	4.01606	0.0520861	SGK1, OSR1, FASTK, PIM1, BUB1B, WNK3, WNK2, AURKB, LRRK2, PRKCD	216	376	16881	2.07853	1	0.969567	53.2594
GOTERM_MF_DIRECT	GO:0008135	translation factor activity, RNA binding	3	1.20482	0.0523453	SOX11, EEF1A2, CPEB4	216	29	16881	8.08477	1	0.953641	53.4408
GOTERM_MF_DIRECT	GO:0042169	SH2 domain binding	3	1.20482	0.0523453	LILRB1, LAX1, SYNGR3	216	29	16881	8.08477	1	0.953641	53.4408
GOTERM_MF_DIRECT	GO:0044325	ion channel binding	5	2.00803	0.0564476	CAV1, ABCC9, CALM3, AKAP6, LRRK2	216	113	16881	3.45809	1	0.947679	56.2259

## Sheet: KIRC
Category	Term ID	Term Name	Count	%	PValue	Genes	List Total	Pop Hits	Pop Total	Fold Enrichment	Bonferroni	Benjamini	FDR
GOTERM_BP_DIRECT	GO:0001525	angiogenesis	22	4.66102	2.23104e-07	PIK3CG, FMNL3, CAV1, FLT1, EFNA1, TBX4, APOLD1, NRXN1, ESM1, VASH1, NDNF, MEOX2, UNC5B, ITGA5, PLXDC1, HOXA7, SERPINE1, VEGFA, TGFA, COL8A1, PLXND1, TNFAIP2	423	223	16792	3.91634	0.000561173	0.000561173	0.000393864
GOTERM_BP_DIRECT	GO:0006935	chemotaxis	14	2.9661	1.21666e-05	FPR1, CCL5, PLAUR, CXCL10, CCRL2, CCR9, CCR6, CCR5, CCR4, CCR2, CMTM4, SPN, PTAFR, PLAU	423	122	16792	4.55544	0.0301476	0.0151892	0.0214766
GOTERM_BP_DIRECT	GO:0050900	leukocyte migration	13	2.75424	5.82241e-05	CD84, ICAM1, CAV1, APOB, CD44, ITGA5, PODXL, MMP9, FPR1, TREM1, SIRPA, SLC7A11, SPN	423	122	16792	4.23005	0.136271	0.0476589	0.102738
GOTERM_BP_DIRECT	GO:0006955	immune response	26	5.50847	6.76557e-05	PXDN, HLA-DRB1, FASLG, TLR6, CCL5, CXCL10, B2M, HLA-DOB, SPN, IL2RA, IL7, CTSS, TNFSF9, HLA-E, TNFSF8, CCR9, LILRB2, TNFRSF10B, CCR6, CCR5, CCR4, LAX1, CCR2, NGFR, MAP3K14, PTAFR	423	421	16792	2.45162	0.156527	0.041664	0.119371
GOTERM_BP_DIRECT	GO:0071222	cellular response to lipopolysaccharide	12	2.54237	0.000129318	HAVCR2, LILRB1, ICAM1, LILRB2, CCR5, SERPINE1, PYCARD, TNFAIP3, CD180, TNIP3, CXCL10, B2M	423	113	16792	4.21565	0.277751	0.0630049	0.228051
GOTERM_BP_DIRECT	GO:0006954	inflammatory response	23	4.87288	0.000252561	HAVCR2, PIK3CG, IL2RA, FPR1, TLR3, NFAM1, TLR6, CCL5, TLR7, CD180, CXCL10, CCRL2, TNFRSF10B, CCR5, CCR4, CCR2, SCN9A, PYCARD, CRH, NGFR, TNFAIP3, PTAFR, TNIP3	423	379	16792	2.40908	0.470341	0.100504	0.44493
GOTERM_BP_DIRECT	GO:0002250	adaptive immune response	13	2.75424	0.000364523	PIK3CG, HAVCR2, TNFRSF13C, CTSS, HLA-E, BTLA, LILRB1, CD84, LILRB2, LAT2, BTN3A1, LAX1, PAG1	423	148	16792	3.48693	0.600406	0.122821	0.641573
GOTERM_BP_DIRECT	GO:0030198	extracellular matrix organization	15	3.17797	0.000449711	ICAM1, PXDN, OLFML2B, DAG1, OLFML2A, SPARC, COL5A3, COL5A1, NDNF, VCAM1, CD44, ITGA5, SERPINE1, LOX, COL8A1	423	196	16792	3.03807	0.677524	0.131915	0.790947
GOTERM_BP_DIRECT	GO:0010886	positive regulation of cholesterol storage	4	0.847458	0.000511587	LPL, APOB, SCARB1, SREBF2	423	7	16792	22.6842	0.724035	0.133292	0.89931
GOTERM_BP_DIRECT	GO:0007166	cell surface receptor signaling pathway	18	3.81356	0.00059936	IL2RA, TRPV1, ERBB2, ADCYAP1R1, MET, EDN1, TSPAN6, CXCL10, IL12RB2, LILRB2, IFNAR2, TNFRSF10B, CCR5, PRLR, CLEC2D, KLRD1, SPN, CD28	423	274	16792	2.60786	0.778746	0.140018	1.05284
GOTERM_CC_DIRECT	GO:0005886	plasma membrane	174	36.8644	1.45154e-14	QRFPR, F2RL3, MICB, PLXNA4, OCLN, ADCY2, EFNA1, OSMR, BTC, KNTC1, SYT7, TLR6, TLR7, ZNRF3, B2M, ATP2B3, APOB, ANK1, CD44, UNC5B, SLC2A3, GRIN2D, SERPINE1, GP2, KLRD1, HTR1F, SPN, PAG1, PIK3CG, MAGI3, SUCLG2, APOLD1, PTPRT, HLA-E, SIRPA, PLAUR, CCR9, LILRB1, LILRB2, CD38, LAT2, BTN3A1, CCR6, VSIG1, CCR5, GPR55, ARRB2, CLEC12A, CCR4, HTR7, LSAMP, CLEC12B, CCR2, BTN3A3, BTN3A2, CAV1, RALGPS1, HLA-DR…	451	4121	18224	1.70614	5.51215e-12	5.51215e-12	2.01283e-11
GOTERM_CC_DIRECT	GO:0005887	integral component of plasma membrane	85	18.0085	2.89391e-14	SLC5A3, QRFPR, F2RL3, IGDCC3, ADCY2, PLXNA4, TRPV1, SLC16A10, EFNA1, TRPV2, TSPAN6, FASLG, GJA1, TLR3, KCNJ10, TLR6, TLR7, LGR5, ZNRF3, CCRL2, SLC1A4, ATP2B3, SLC23A1, CD44, SLC24A4, SLC2A3, SLC24A2, TGFA, HTR1F, PAG1, SPN, ZDHHC2, ICAM1, MPP2, NRXN1, SLC7A14, SLC7A11, PLAUR, CD84, CCR9, LILRB2, BSND, IFNAR2, CCR6, TNFRSF10B, CCR5, GPR55, CCR4, HTR7, CCR2, NGFR, PTAFR, DEGS1, CAV1, HLA-DRB1, FFAR…	451	1415	18224	2.42733	1.09822e-11	5.49116e-12	4.01013e-11
GOTERM_CC_DIRECT	GO:0009986	cell surface	40	8.47458	2.44257e-09	MBL2, MICB, HLA-DRB1, ADCYAP1R1, TRPV2, TLR3, SLC1A4, VCAM1, HSPA2, CD44, CLEC2D, APOH, TGFA, PCSK9, SCARB1, SPN, CD28, HAVCR2, ICAM1, LPL, STX4, MET, PTPRT, NRXN1, SPARC, NFAM1, HLA-E, SLC7A11, TIGIT, CCR9, CD38, LILRB2, TNFRSF10B, CCR6, PRLR, CCR5, ITGA5, VEGFA, NGFR, PLAU	451	542	18224	2.98214	9.25732e-07	3.08577e-07	3.38016e-06
GOTERM_CC_DIRECT	GO:0016021	integral component of membrane	175	37.0763	1.0766e-06	C15ORF48, QRFPR, F2RL3, MICB, PLXNA4, OCLN, ADCY2, SERTM1, OSMR, BTC, TSPAN6, TLR3, SYT7, TLR6, TLR7, ANKLE1, ZNRF3, ATP2B3, BDNF, CD44, UNC5B, SLC2A3, GRIN2D, GP2, GXYLT2, RNF149, KLRD1, SPN, GRID1, ATRNL1, C10ORF105, FUT11, LRP1B, APOLD1, CORO7, PTPRT, HLA-E, SIRPA, PLAUR, CCR9, LHFPL3, LILRB1, TMEM133, LHFPL2, LILRB2, CD38, LAT2, BTN3A1, NNT, PITPNM3, VSIG1, GPR55, CLEC12A, CCR5, SLC25A33, CCR…	451	5163	18224	1.36963	0.000407947	0.000102002	0.00148985
GOTERM_CC_DIRECT	GO:0009897	external side of plasma membrane	18	3.81356	2.3045e-05	ICAM1, IL2RA, HLA-DRB1, TRPV1, TNFRSF13C, FASLG, B2M, CXCL10, LILRB1, IL12RB2, VCAM1, CCR5, ITGA5, CCR4, KLRD1, CLEC14A, SPN, CD28	451	213	18224	3.41476	0.00869612	0.00174531	0.0318862
GOTERM_CC_DIRECT	GO:0016020	membrane	84	17.7966	4.85599e-05	KIFC1, ADCY2, EFNA1, PKMYT1, TLR3, KCNJ10, SYT7, B2M, SLC1A4, KIF2C, SLC23A1, SLC24A4, ORC6, CAT, RNF149, LOXL2, SPN, RAP2B, PIK3CG, ICAM1, MAGI3, STX4, ATRNL1, MPP2, WNK1, CORO7, PTPRT, HLA-E, SIRPA, SLC7A11, LILRB2, CD38, RPS19, NNT, LAX1, VEGFA, EIF4A1, BTN3A3, BTN3A2, PTAFR, MELK, FHOD1, DEGS1, ALDOA, ERMP1, CAV1, HLA-DRB1, LMNB1, RAP1GAP, ADCYAP1R1, ERBB2, TFCP2L1, SIPA1, DAG1, FXYD5, COLGAL…	451	2200	18224	1.54285	0.0182363	0.00306274	0.0671789
GOTERM_CC_DIRECT	GO:0005615	extracellular space	56	11.8644	0.000156062	NOG, PXDN, MMP9, BTC, EDN1, FASLG, FSTL1, B2M, CXCL10, APOB, SERPINE1, CCBE1, APOH, TGFA, CAT, LOX, LOXL2, SPN, ICAM1, STX4, STC2, CTSS, VASH1, IFNAR2, LILRB2, PLXDC1, VEGFA, TNFAIP2, ADAMTS4, ALDOA, MBL2, TWSG1, DAG1, CCL5, SERPINH1, PCSK2, VCAM1, PCSK9, ANGPTL2, CPA4, CES3, LPL, FLT1, IL7, PODXL, SPARC, TNFSF9, TNFSF8, AFP, CRH, FJX1, SPTBN2, BMP7, CMTM4, PLAU, BMP8A	451	1347	18224	1.67992	0.0574365	0.00841468	0.215751
GOTERM_CC_DIRECT	GO:0045121	membrane raft	15	3.17797	0.000623528	RAP2B, EFHD2, ICAM1, LAT2, CAV1, ADCY2, UNC5B, LAX1, PODXL, DAG1, GJA1, NFAM1, TLR6, SERPINH1, PAG1	451	206	18224	2.94233	0.210528	0.0291165	0.859427
GOTERM_CC_DIRECT	GO:0010369	chromocenter	4	0.847458	0.00278658	CDCA8, OIP5, AURKB, ESCO2	451	12	18224	13.4693	0.652708	0.110868	3.788
GOTERM_CC_DIRECT	GO:0070062	extracellular exosome	92	19.4915	0.00345946	PXDN, GM2A, WASF3, THRB, EFNA1, MMP9, TSPAN6, FASLG, GJA1, FSTL1, SYT7, ALDH1L2, PDHB, B2M, SLC1A4, SLC23A1, GSTM3, APOB, HIST1H2BN, CD44, PLOD1, SLC2A3, GP2, SERPINE1, APOH, CAT, RNF149, SPN, GRID1, RAP2B, ICAM1, STX4, FUT11, MPP5, ATP6V1H, HLA-E, SIRPA, PLAUR, CD84, CD38, LAT2, RPS19, TRIM36, BTG2, EIF4A1, PEBP1, TNFAIP3, ALDOA, TWSG1, ACADSB, RAB3B, CAB39L, HLA-DRB1, HIST1H2AG, C6, DAG1, BTN2A…	451	2811	18224	1.3225	0.731098	0.123081	4.68252
GOTERM_MF_DIRECT	GO:0004950	chemokine receptor activity	6	1.27119	5.03314e-05	CCRL2, CCR9, CCR6, CCR5, CCR4, CCR2	431	17	16881	13.8237	0.0363186	0.0363186	0.0763713
GOTERM_MF_DIRECT	GO:0016493	C-C chemokine receptor activity	5	1.05932	0.0001747	CCR9, CCR6, CCR5, CCR4, CCR2	431	12	16881	16.3196	0.120512	0.06219	0.264851
GOTERM_MF_DIRECT	GO:0005102	receptor binding	21	4.44915	0.000755919	MBL2, LPL, CAV1, EFNA1, GJA1, FASLG, NRXN1, HLA-E, TNFSF9, CXCL10, PLAUR, TNFSF8, TIGIT, TRAF3IP2, ARRB2, SERPINE1, CRH, CAT, ANGPTL2, CD200, ABCA12	431	353	16881	2.33005	0.426393	0.16912	1.14129
GOTERM_MF_DIRECT	GO:0001077	transcriptional activator activity, RNA polymerase II core promoter proximal region sequence-specific binding	16	3.38983	0.00109062	PPARA, SIX4, MIXL1, TCF21, MEOX2, BCL11B, POU2F3, SIX1, HOXA7, PBX1, TFAP2C, MYB, TCF4, NFATC2, MYC, RUNX2	431	236	16881	2.65539	0.551589	0.181688	1.64273
GOTERM_MF_DIRECT	GO:0004888	transmembrane signaling receptor activity	15	3.17797	0.00120323	ICAM1, TRPV1, ERBB2, TLR3, NFAM1, NRXN1, TLR6, TLR7, LGR5, EVI2A, SIGLEC8, CLEC2D, NGFR, KLRD1, SPN	431	214	16881	2.74535	0.587249	0.162205	1.8109
GOTERM_MF_DIRECT	GO:0004872	receptor activity	15	3.17797	0.0013726	ICAM1, ADCYAP1R1, TLR3, NRXN1, TLR6, TLR7, CD180, PLAUR, TIGIT, LILRB2, TNFRSF10B, CCR6, NGFR, TREM1, CD200	431	217	16881	2.7074	0.635618	0.154865	2.06333
GOTERM_MF_DIRECT	GO:0031402	sodium ion binding	4	0.847458	0.00304213	SLC24A4, SLC24A2, SCN9A, ATP1A1	431	12	16881	13.0557	0.893475	0.273786	4.5194
GOTERM_MF_DIRECT	GO:0005518	collagen binding	7	1.48305	0.00413606	CD44, MMP9, CCBE1, CTSS, SPARC, COL5A3, SERPINH1	431	60	16881	4.56949	0.952466	0.316678	6.09738
GOTERM_MF_DIRECT	GO:0005524	ATP binding	55	11.6525	0.00560494	KIFC1, XRCC2, ADCY2, TRPV1, PKMYT1, KCNJ10, MOV10L1, AURKB, PAK6, KIF2C, ATP2B3, PIK3CG, CDC6, MAGI3, SUCLG2, WNK1, WNK3, RAD51, HUNK, MAP4K4, PANK1, EIF4A1, PEBP1, MAP3K14, PCCB, SLFN12L, MELK, ERBB2, PFKFB2, CHEK2, ACSBG1, HSPA2, DCLK3, POLQ, RUNX1, RUNX2, EHD2, ACSL6, RUNX3, RHOBTB3, ABCA12, AATK, ERCC6L, FLT1, MKI67, MET, MYO1F, ACLY, ATP1A1, ATAD5, ABCG8, DNA2, SLFN13, PIP4K2C, CLCN5	431	1495	16881	1.44093	0.983937	0.3681	8.1779
GOTERM_MF_DIRECT	GO:0042169	SH2 domain binding	5	1.05932	0.00595401	LILRB1, LAT2, LAX1, DAG1, PAG1	431	29	16881	6.75294	0.98759	0.355272	8.66595

## Sheet: KIRP
Category	Term ID	Term Name	Count	%	PValue	Genes	List Total	Pop Hits	Pop Total	Fold Enrichment	Bonferroni	Benjamini	FDR
GOTERM_BP_DIRECT	GO:0006641	triglyceride metabolic process	6	2.14286	0.000155427	LPL, G6PC, APOC3, APOH, CAT, CPT1A	250	35	16792	11.5145	0.223695	0.223695	0.260504
GOTERM_BP_DIRECT	GO:0006468	protein phosphorylation	19	6.78571	0.000163542	MYLK3, TGFBR2, WNK1, BIRC5, WNK3, PBK, BRSK1, CHEK2, PRKCE, CAMKV, CDKL1, PLK2, BUB1, PRKAA2, DYRK2, BMPR1B, CAMK2A, MYLK, MAP3K12	250	456	16792	2.79867	0.233891	0.124724	0.274088
GOTERM_BP_DIRECT	GO:0042698	ovulation cycle	4	1.42857	0.000170744	TYRO3, GABRB1, AXL, BMPR1B	250	8	16792	33.584	0.242828	0.0885529	0.286142
GOTERM_BP_DIRECT	GO:0007165	signal transduction	34	12.1429	0.000239356	CXCL5, FGF9, TAS2R5, GABRB1, FASLG, SOX9, CXCL12, LILRA2, EVI2A, STARD8, PYCARD, PRKAA2, UNC5C, ANGPTL3, SHC3, FGF1, CHRFAM7A, HLA-DOB, RAP2B, TYRO3, AR, MET, AXL, PRKCE, ITPR1, SH3BP5, CORO1C, LILRB1, SALL3, LILRB2, SYDE2, CD34, OPHN1, IGFBP5	250	1161	16792	1.96702	0.322914	0.0928879	0.400909
GOTERM_BP_DIRECT	GO:0045766	positive regulation of angiogenesis	9	3.21429	0.000315548	FLT1, CD34, F3, CCBE1, TGFBR2, TBXA2R, CHRFAM7A, ANGPTL3, FGF1	250	115	16792	5.25663	0.401967	0.0977123	0.52821
GOTERM_BP_DIRECT	GO:0018108	peptidyl-tyrosine phosphorylation	10	3.57143	0.000468707	NTRK3, TYRO3, FLT1, FGF9, MET, AXL, DYRK2, FGF1, MELK, WEE1	250	153	16792	4.39007	0.534062	0.119516	0.783642
GOTERM_BP_DIRECT	GO:0046777	protein autophosphorylation	10	3.57143	0.00108548	NTRK3, TYRO3, NME2, FLT1, WNK1, WNK3, CHEK2, CAMK2A, MELK, MAP3K12	250	172	16792	3.90512	0.829531	0.223332	1.80603
GOTERM_BP_DIRECT	GO:0018105	peptidyl-serine phosphorylation	8	2.85714	0.00262345	CDC7, CLSPN, PLK2, TGFBR2, CHEK2, PRKCE, CAMK2A, MAP3K12	250	125	16792	4.29875	0.986146	0.414273	4.31248
GOTERM_BP_DIRECT	GO:0010508	positive regulation of autophagy	5	1.78571	0.00283662	SH3BP4, PLK2, RNF152, FOXO1, PRKAA2	250	40	16792	8.396	0.99022	0.401996	4.6551
GOTERM_BP_DIRECT	GO:0050796	regulation of insulin secretion	6	2.14286	0.00314877	HNF4A, CACNA1E, RAPGEF4, MARCKS, ITPR1, CPT1A	250	67	16792	6.01504	0.994127	0.401749	5.15473
GOTERM_CC_DIRECT	GO:0070062	extracellular exosome	64	22.8571	0.000313044	THRB, FGF9, NPNT, MMP7, FASLG, CXCL12, SLC1A4, GSTM3, SLC25A25, CXCR4, ARL15, SERPINA4, GP2, APOH, CAT, NEGR1, RAP2B, HIST1H1E, CRYAA, LIFR, MPP6, CFTR, CYB5A, HLA-B, SIRPA, PCOLCE2, NME2, CDKL1, G6PD, F3, CLIC5, PPM1L, ALDOA, ACADSB, RAB3B, CAB39L, HIST1H2AG, AGMAT, DAAM2, FAM213A, APOC3, SERPINC1, B4GALT5, RHOBTB3, GPR155, LPL, CR1, BHMT2, ACY1, C11ORF54, PODXL, AXL, CREB5, ATP1A1, TKT, MAN1C1,…	269	2811	18224	1.54245	0.079621	0.079621	0.409624
GOTERM_CC_DIRECT	GO:0005886	plasma membrane	86	30.7143	0.00034631	SLC5A3, QRFPR, PRX, ADCY7, TAS2R5, SLC16A10, GABRB1, FASLG, KCNJ10, SLC7A7, SLC1A4, KCNQ5, CXCR4, GP2, RAPGEF4, CAT, UNC5C, SCN7A, CHRFAM7A, SHC3, KLRD1, NEGR1, MTUS1, GJD2, RAP2B, AR, ARC, PTGER4, SIGLEC10, LIFR, PCDH9, MPP6, CFTR, HLA-B, SIGLEC14, PRKCE, SIRPA, SLC7A11, LILRB1, LILRB2, PLCE1, CCR5, CLEC12A, CD34, F3, PTGFRN, ARL4C, ADD2, MAP3K12, MELK, SLC2A12, RAB3B, CYP51A1, KCNJ3, PAQR5, CAM…	269	4121	18224	1.4138	0.0877014	0.0448568	0.453061
GOTERM_CC_DIRECT	GO:0009986	cell surface	18	6.42857	0.00286464	LPL, CR1, MET, AXL, MMP7, CFTR, HLA-B, SLC7A11, SLC1A4, LILRB2, CCR5, CXCR4, F3, ITGA8, CLEC2D, APOH, PTGFRN, ANGPTL3	269	542	18224	2.24991	0.532436	0.223847	3.69108
GOTERM_CC_DIRECT	GO:0009897	external side of plasma membrane	10	3.57143	0.00436299	LILRB1, CCR5, CD34, TGFBR2, CTLA4, FASLG, CHRFAM7A, CXCL12, KCNJ3, KLRD1	269	213	18224	3.18062	0.686113	0.251497	5.57118
GOTERM_CC_DIRECT	GO:0016021	integral component of membrane	96	34.2857	0.00636132	SLC5A3, C15ORF48, QRFPR, ADCY7, TAS2R5, SLC16A10, B3GALT5, GABRB1, FASLG, KCNJ10, SCIMP, SLC7A7, SLC1A4, NKPD1, SLC25A25, LILRA2, CXCR4, EVI2A, GP2, TMEM98, NIPAL1, UNC5C, CHRFAM7A, KLRD1, GJD2, TYRO3, AR, SMIM18, PTGER4, SLC22A23, SIGLEC10, LIFR, MCU, PCDH9, CFTR, TMEM200C, CYB5A, HLA-B, SIGLEC14, SIRPA, SLC7A11, MYCN, LILRB1, LHFPL2, LILRB2, G6PC, PITPNM3, CCR5, CLEC12A, CD34, F3, CLDN1, PPM1L,…	269	5163	18224	1.25968	0.81569	0.286967	8.02591
GOTERM_CC_DIRECT	GO:0005887	integral component of plasma membrane	33	11.7857	0.00989789	QRFPR, SLC5A3, SLC2A12, SLC16A10, GABRB1, FASLG, KCNJ10, SLC7A7, SLC1A4, CLEC2D, HCN1, TYRO3, CR1, FLT1, PTGER4, PODXL, SLC22A23, TGFBR2, MET, AXL, CTLA4, LIFR, HLA-B, SLC7A11, CD180, NTRK3, LILRB2, CCR5, CD34, CLDN1, TBXA2R, BMPR1B, TM4SF5	269	1415	18224	1.57997	0.928353	0.355535	12.2262
GOTERM_CC_DIRECT	GO:0042627	chylomicron	3	1.07143	0.01745	LPL, APOC3, APOH	269	14	18224	14.5173	0.990581	0.486465	20.6093
GOTERM_CC_DIRECT	GO:0045171	intercellular bridge	4	1.42857	0.0267431	CDC7, CDCA8, CD34, SP4	269	44	18224	6.15884	0.999241	0.592586	29.9089
GOTERM_CC_DIRECT	GO:0030027	lamellipodium	7	2.5	0.0311423	CORO1C, NME2, PODXL, ANGPTL3, APBB2, MYLK, CTNNA3	269	160	18224	2.96394	0.999771	0.606057	33.9506
GOTERM_CC_DIRECT	GO:0034361	very-low-density lipoprotein particle	3	1.07143	0.0343931	LPL, APOC3, APOH	269	20	18224	10.1621	0.999906	0.604443	36.7977
GOTERM_MF_DIRECT	GO:0004672	protein kinase activity	17	6.07143	9.8811e-05	CDC7, MET, WNK1, WNK3, PBK, BRSK1, CHEK2, PRKCE, SOX9, WEE1, CAMKV, CDKL1, BUB1, PRKAA2, CAMK2A, MELK, MAP3K12	252	359	16881	3.17214	0.0482072	0.0482072	0.142198
GOTERM_MF_DIRECT	GO:0004674	protein serine/threonine kinase activity	17	6.07143	0.000168311	CDC7, WNK1, WNK3, PBK, BRSK1, CHEK2, PRKCE, NME2, CDKL1, PLK2, BUB1, PRKAA2, DYRK2, BMPR1B, CAMK2A, MELK, MAP3K12	252	376	16881	3.02872	0.0807181	0.0412081	0.242101
GOTERM_MF_DIRECT	GO:0005524	ATP binding	40	14.2857	0.000385212	XRCC3, ADCY7, KCNJ10, CHEK2, BRSK1, CAMKV, KIF2C, BUB1, DYRK2, PRKAA2, CAMK2A, EHD3, ABCA12, RHOBTB3, CDC7, TYRO3, CDC6, FLT1, MYLK3, TGFBR2, MET, WNK1, AXL, CFTR, WNK3, ATP1A1, PBK, PRKCE, WEE1, RAD51, NTRK3, NME2, CDKL1, PLK2, PANK1, SLFN13, BMPR1B, MAP3K12, MELK, MYLK	252	1495	16881	1.79232	0.175224	0.0621961	0.553292
GOTERM_MF_DIRECT	GO:0004714	transmembrane receptor protein tyrosine kinase activity	5	1.78571	0.00236806	NTRK3, TYRO3, FLT1, MET, AXL	252	38	16881	8.81422	0.694386	0.256479	3.35652
GOTERM_MF_DIRECT	GO:0004713	protein tyrosine kinase activity	8	2.85714	0.00376213	TYRO3, FLT1, FGF9, MET, AXL, DYRK2, FGF1, WEE1	252	133	16881	4.02936	0.848112	0.314031	5.28317
GOTERM_MF_DIRECT	GO:0001618	virus receptor activity	6	2.14286	0.00385194	TYRO3, CR1, CCR5, CXCR4, AXL, CLDN1	252	70	16881	5.74184	0.854807	0.275023	5.40605
GOTERM_MF_DIRECT	GO:0019899	enzyme binding	13	4.64286	0.00428694	GSTM3, AR, NME2, PLCE1, THRB, HIST1H2AG, PYCARD, CYB5A, BIRC5, CDC20, CFTR, CAT, PRKCE	252	333	16881	2.61515	0.883292	0.264253	5.99916
GOTERM_MF_DIRECT	GO:0019869	chloride channel inhibitor activity	3	1.07143	0.0073996	WNK1, WNK3, CFTR	252	9	16881	22.3294	0.975609	0.371359	10.1433
GOTERM_MF_DIRECT	GO:0008201	heparin binding	8	2.85714	0.010092	LPL, FGF9, APOH, SERPINC1, MMP7, ANGPTL3, FGF1, PCOLCE2	252	160	16881	3.3494	0.993728	0.430794	13.59
GOTERM_MF_DIRECT	GO:0016705	oxidoreductase activity, acting on paired donors, with incorporation or reduction of molecular oxygen	5	1.78571	0.0101781	CYP4A11, CYP27C1, CYP27B1, CYP4A22, CYP51A1	252	57	16881	5.87615	0.993995	0.400413	13.6982

## Sheet: LIHC
Category	Term ID	Term Name	Count	%	PValue	Genes	List Total	Pop Hits	Pop Total	Fold Enrichment	Bonferroni	Benjamini	FDR
GOTERM_BP_DIRECT	GO:0048812	neuron projection morphogenesis	6	3.8961	3.63197e-05	SGK1, NTF3, GPM6A, DMD, LRRK2, WEE1	133	48	16792	15.782	0.0411868	0.0411868	0.0584406
GOTERM_BP_DIRECT	GO:0009083	branched-chain amino acid catabolic process	4	2.5974	0.000419591	BCAT1, DBT, IVD, ACAT1	133	19	16792	26.5801	0.384911	0.215724	0.673198
GOTERM_BP_DIRECT	GO:0018105	peptidyl-serine phosphorylation	6	3.8961	0.0030741	SGK1, CAMK4, MAPK13, LRRK2, SRC, PRKCB	133	125	16792	6.06027	0.971711	0.695301	4.83461
GOTERM_BP_DIRECT	GO:0042738	exogenous drug catabolic process	3	1.94805	0.00384411	CYP2C19, CYP2B6, CYP1A2	133	12	16792	31.5639	0.988438	0.67209	6.01079
GOTERM_BP_DIRECT	GO:0042981	regulation of apoptotic process	7	4.54545	0.00677341	EGR1, BMP10, SGK1, DUSP1, NTF3, ESR1, BMP8B	133	213	16792	4.14925	0.999618	0.792797	10.3618
GOTERM_BP_DIRECT	GO:0051895	negative regulation of focal adhesion assembly	3	1.94805	0.00684709	DLC1, THBS1, SRC	133	16	16792	23.6729	0.99965	0.734472	10.4688
GOTERM_BP_DIRECT	GO:0045893	positive regulation of transcription, DNA-templated	11	7.14286	0.00749786	EGR1, BMP10, KLF6, AR, CAMK4, ID2, MAP2K1, ESR1, FOXO1, HMGA1, SRC	133	515	16792	2.69672	0.999836	0.712069	11.4084
GOTERM_BP_DIRECT	GO:0060749	mammary gland alveolus development	3	1.94805	0.00772033	AR, ID2, ESR1	133	17	16792	22.2804	0.999873	0.674324	11.7274
GOTERM_BP_DIRECT	GO:0019373	epoxygenase P450 pathway	3	1.94805	0.00864094	CYP2C19, CYP2B6, CYP1A2	133	18	16792	21.0426	0.999957	0.67262	13.0364
GOTERM_BP_DIRECT	GO:0000187	activation of MAPK activity	5	3.24675	0.0100976	NTF3, MAP2K1, SAA1, THBS1, LRRK2	133	107	16792	5.8998	0.999992	0.691257	15.0703
GOTERM_CC_DIRECT	GO:0005887	integral component of plasma membrane	27	17.5325	2.24388e-05	FXYD1, SLC39A14, PLXNA3, SLC38A2, LDLR, JAG2, SLC19A3, MFSD2A, SDC4, GRIN2B, SLC4A4, SLC31A1, SLC28A1, SLC1A1, PODXL, NPBWR1, LIFR, GRIN2A, SLC7A11, THY1, SLC6A9, LYVE1, P2RX3, PDGFRA, AVPR1A, HAS2, HS3ST3B1	140	1415	18224	2.48384	0.00434371	0.00434371	0.0279808
GOTERM_CC_DIRECT	GO:0005886	plasma membrane	51	33.1169	0.000231886	PLXNA3, LDLR, IL6ST, JAG2, MFSD2A, SDC4, FRMD6, GRIN2B, CALN1, SLC4A4, KLRD1, RHOF, SLC1A1, AR, SGK1, KCND3, NPBWR1, ESR1, LIFR, GRIN2A, COLEC12, SLC7A11, THY1, PRKCB, PDGFRA, MCC, LRRK2, DCUN1D3, FXYD1, SLC39A14, SLC38A2, SLC19A3, SRC, ACSL1, GPM6A, DMD, PALM2, SLC30A2, SLC31A1, SLC28A1, FZD9, MAP2K1, PODXL, EPM2A, ATP11C, TNFSF9, SLC6A9, LYVE1, FREM2, P2RX3, AVPR1A	140	4121	18224	1.61095	0.043994	0.0222444	0.288811
GOTERM_CC_DIRECT	GO:0043005	neuron projection	8	5.19481	0.00229991	GRIN2B, GPM6A, CPEB3, NPBWR1, PDLIM5, GRIN2A, LRRK2, SRC	140	237	18224	4.39397	0.360262	0.138344	2.83078
GOTERM_CC_DIRECT	GO:0005770	late endosome	5	3.24675	0.014243	LDLR, MAP2K1, SLC30A2, SLC31A1, SRC	140	122	18224	5.33489	0.938148	0.5013	16.3817
GOTERM_CC_DIRECT	GO:0005789	endoplasmic reticulum membrane	14	9.09091	0.0146423	FZD9, SGK1, CYP2C19, CYP2B6, FAXDC2, ERLIN1, MFSD2A, CYP1A2, CYP4V2, ATP11C, RTN2, ACSL1, CYP4A22, FKBP10	140	862	18224	2.11415	0.942823	0.435786	16.8031
GOTERM_CC_DIRECT	GO:0009986	cell surface	10	6.49351	0.0232016	FZD9, BMP10, GRIN2B, LDLR, DMD, FERMT2, GRIN2A, THBS1, SDC4, SLC7A11	140	542	18224	2.40169	0.989477	0.531878	25.3804
GOTERM_CC_DIRECT	GO:0005739	mitochondrion	18	11.6883	0.0249605	BCAT1, SHMT1, MTHFD2L, SGK1, MAP2K1, LDHD, TAZ, FOXO1, ACAT1, SPRYD4, SRC, DBT, STARD5, ACSL1, FXN, IVD, HIVEP1, LRRK2	140	1331	18224	1.76039	0.992582	0.503683	27.0389
GOTERM_CC_DIRECT	GO:0042383	sarcolemma	4	2.5974	0.0272443	FXYD1, KCND3, SLC38A2, DMD	140	85	18224	6.12571	0.995293	0.48821	29.1418
GOTERM_CC_DIRECT	GO:0031090	organelle membrane	4	2.5974	0.0289203	CYP4A22, CYP2C19, CYP2B6, CYP1A2	140	87	18224	5.98489	0.996631	0.468783	30.6494
GOTERM_CC_DIRECT	GO:0070062	extracellular exosome	31	20.1299	0.0327586	NAMPT, IL6ST, SDC4, ACAT1, SRC, PBLD, GPM6A, CRISPLD2, SAA1, APOC3, H2AFZ, SLC4A4, THBS1, SLC1A1, RHOF, COBLL1, SHMT1, C11ORF54, MAP2K1, PODXL, LIFR, COLEC12, PRKCB, THY1, LYVE1, CAMK4, FREM2, CFL2, RAB34, LRRK2, SLC46A3	140	2811	18224	1.43554	0.998438	0.475945	33.9916
GOTERM_MF_DIRECT	GO:0005080	protein kinase C binding	5	3.24675	0.000520121	PDLIM5, AVPR1A, SDC4, SRC, PRKCB	138	46	16881	13.2963	0.175101	0.175101	0.714852
GOTERM_MF_DIRECT	GO:0008013	beta-catenin binding	6	3.8961	0.000541082	AR, NR4A2, ESR1, FOXO1, KDM6B, CTNNA3	138	82	16881	8.95069	0.181478	0.0952777	0.743562
GOTERM_MF_DIRECT	GO:0004497	monooxygenase activity	5	3.24675	0.00125447	CYP4A22, CYP2C19, CYP2B6, CYP4V2, CYP1A2	138	58	16881	10.5454	0.371516	0.143426	1.71607
GOTERM_MF_DIRECT	GO:0020037	heme binding	6	3.8961	0.00520033	CYP4A22, CYP2C19, CYP2B6, CYP4V2, CYP1A2, SRC	138	137	16881	5.35735	0.854727	0.382629	6.93744
GOTERM_MF_DIRECT	GO:0030169	low-density lipoprotein particle binding	3	1.94805	0.00640631	LDLR, COLEC12, THBS1	138	15	16881	24.4652	0.90726	0.378483	8.48117
GOTERM_MF_DIRECT	GO:0005506	iron ion binding	6	3.8961	0.00821881	CYP4A22, CYP2C19, CYP2B6, FAXDC2, CYP4V2, CYP1A2	138	153	16881	4.7971	0.952808	0.398856	10.7567
GOTERM_MF_DIRECT	GO:0004672	protein kinase activity	9	5.84416	0.0090183	CAMK4, MAP2K1, MAPK13, PDGFRA, LRRK2, SRC, WEE1, TRIB1, PRKCB	138	359	16881	3.06667	0.964983	0.380501	11.7436
GOTERM_MF_DIRECT	GO:0016705	oxidoreductase activity, acting on paired donors, with incorporation or reduction of molecular oxygen	4	2.5974	0.0111183	CYP4A22, CYP2C19, CYP2B6, CYP4V2	138	57	16881	8.58429	0.984026	0.403754	14.288
GOTERM_MF_DIRECT	GO:0044325	ion channel binding	5	3.24675	0.0135336	FXYD1, KCND3, ID2, LRRK2, SRC	138	113	16881	5.41266	0.993537	0.428894	17.1302
GOTERM_MF_DIRECT	GO:0004923	leukemia inhibitory factor receptor activity	2	1.2987	0.0161659	IL6ST, LIFR	138	2	16881	122.326	0.997595	0.452846	20.128

## Sheet: LUAD
Category	Term ID	Term Name	Count	%	PValue	Genes	List Total	Pop Hits	Pop Total	Fold Enrichment	Bonferroni	Benjamini	FDR
GOTERM_BP_DIRECT	GO:0001568	blood vessel development	5	4.46429	7.48135e-05	MAP3K3, TGFBR2, COL1A1, COL5A1, FLVCR1	101	38	16792	21.876	0.0551326	0.0551326	0.113964
GOTERM_BP_DIRECT	GO:0006468	protein phosphorylation	11	9.82143	0.000386015	CCNE1, CDKL1, PDGFB, SNRK, LIMK1, RASSF2, TGFBR2, TBRG4, AURKB, MYLK, DAPK1	101	456	16792	4.0106	0.253721	0.136126	0.586721
GOTERM_BP_DIRECT	GO:0030574	collagen catabolic process	5	4.46429	0.000572067	MMP9, COL3A1, COL1A1, COL5A2, COL5A1	101	64	16792	12.9889	0.351927	0.134618	0.86836
GOTERM_BP_DIRECT	GO:0001501	skeletal system development	6	5.35714	0.00136037	HOXA11, MMP9, COL3A1, RASSF2, COL1A1, COL5A2	101	137	16792	7.28135	0.643657	0.227378	2.05341
GOTERM_BP_DIRECT	GO:0030199	collagen fibril organization	4	3.57143	0.00160298	COL3A1, COL1A1, COL5A2, COL5A1	101	39	16792	17.052	0.703597	0.215891	2.41546
GOTERM_BP_DIRECT	GO:0007155	cell adhesion	10	8.92857	0.00166319	CDH13, WISP1, DSG2, LSAMP, COL1A1, CXCL12, SIRPA, DST, TPBG, COL5A1	101	459	16792	3.62217	0.716841	0.189652	2.50511
GOTERM_BP_DIRECT	GO:0090280	positive regulation of calcium ion import	3	2.67857	0.00399026	PDGFB, TRPV2, CXCL12	101	16	16792	31.1733	0.951717	0.351409	5.91186
GOTERM_BP_DIRECT	GO:0050900	leukocyte migration	5	4.46429	0.0060834	MMP9, COL1A1, SIRPA, ANGPT4, MIF	101	122	16792	6.81383	0.990199	0.439072	8.88082
GOTERM_BP_DIRECT	GO:0045893	positive regulation of transcription, DNA-templated	9	8.03571	0.0117537	CCNE1, E2F3, PDGFB, HOXA11, SALL1, MYRF, COL1A1, ASPH, HMGA1	101	515	16792	2.90547	0.999872	0.630568	16.4899
GOTERM_BP_DIRECT	GO:1903225	negative regulation of endodermal cell differentiation	2	1.78571	0.0118753	COL5A2, COL5A1	101	2	16792	166.257	0.999883	0.595675	16.6464
GOTERM_CC_DIRECT	GO:0031225	anchored component of membrane	5	4.46429	0.00428522	CDH13, GPC5, LSAMP, CEACAM5, CNTFR	107	113	18224	7.53618	0.509767	0.509767	5.08426
GOTERM_CC_DIRECT	GO:0005578	proteinaceous extracellular matrix	7	6.25	0.00479083	GPC5, WISP1, MMP9, TGFBR3, TIMP3, COL5A2, COL5A1	107	268	18224	4.4486	0.549406	0.328737	5.66824
GOTERM_CC_DIRECT	GO:0005788	endoplasmic reticulum lumen	6	5.35714	0.00529425	HYOU1, PDGFB, COL3A1, COL1A1, COL5A2, COL5A1	107	192	18224	5.32243	0.585706	0.25452	6.2464
GOTERM_CC_DIRECT	GO:0031674	I band	3	2.67857	0.00782956	KAT2B, CFL2, MYPN	107	23	18224	22.2154	0.728779	0.278343	9.10904
GOTERM_CC_DIRECT	GO:0005581	collagen trimer	4	3.57143	0.0165264	COL3A1, COL1A1, COL5A2, COL5A1	107	92	18224	7.40512	0.937106	0.424928	18.3302
GOTERM_CC_DIRECT	GO:0005588	collagen type V trimer	2	1.78571	0.0173492	COL5A2, COL5A1	107	3	18224	113.545	0.945264	0.383814	19.1566
GOTERM_CC_DIRECT	GO:0031012	extracellular matrix	6	5.35714	0.0293722	PDGFB, COL3A1, COL1A1, TIMP3, COL5A2, COL5A1	107	296	18224	3.45239	0.992908	0.506866	30.3886
GOTERM_CC_DIRECT	GO:0070062	extracellular exosome	25	22.3214	0.0314138	TUBB2A, MMP9, CXCL12, TIMP3, MIF, CMBL, TTYH3, HIST1H2BN, SERINC1, CEACAM5, UPK2, TUBB3, CAPN5, LIFR, SIRPA, COL5A1, CDH13, HYOU1, CDKL1, DSG2, HIST2H2BE, CFL2, TGFBR3, DST, MYLK	107	2811	18224	1.51474	0.995	0.484333	32.147
GOTERM_CC_DIRECT	GO:0009897	external side of plasma membrane	5	4.46429	0.0358268	CDH13, EMCN, TGFBR2, TGFBR3, CXCL12	107	213	18224	3.99807	0.997657	0.48979	35.8094
GOTERM_CC_DIRECT	GO:0009986	cell surface	8	7.14286	0.0388355	CAPN5, DSG2, PDGFB, TRPV2, TGFBR3, PTGFRN, TPBG, MIF	107	542	18224	2.51392	0.998605	0.481866	38.2014
GOTERM_MF_DIRECT	GO:0048407	platelet-derived growth factor binding	4	3.57143	3.4118e-05	PDGFB, COL3A1, COL1A1, COL5A1	103	11	16881	59.5975	0.00751185	0.00751185	0.0434531
GOTERM_MF_DIRECT	GO:0046332	SMAD binding	4	3.57143	0.00221789	COL3A1, TGFBR2, TGFBR3, COL5A2	103	43	16881	15.2459	0.387801	0.217569	2.78882
GOTERM_MF_DIRECT	GO:0004672	protein kinase activity	8	7.14286	0.00609806	CDKL1, SNRK, MAP3K3, LIMK1, RASSF2, TBRG4, AURKB, DAPK1	103	359	16881	3.65222	0.741225	0.362754	7.49607
GOTERM_MF_DIRECT	GO:0005201	extracellular matrix structural constituent	4	3.57143	0.00775577	COL3A1, COL1A1, COL5A2, COL5A1	103	67	16881	9.78467	0.82106	0.349606	9.44234
GOTERM_MF_DIRECT	GO:0042056	chemoattractant activity	3	2.67857	0.0115007	PDGFB, CXCL12, MIF	103	27	16881	18.2104	0.922416	0.400271	13.7011
GOTERM_MF_DIRECT	GO:0004896	cytokine receptor activity	3	2.67857	0.0199295	IL20RB, LIFR, CNTFR	103	36	16881	13.6578	0.988309	0.523593	22.6198
GOTERM_MF_DIRECT	GO:0004897	ciliary neurotrophic factor receptor activity	2	1.78571	0.0239531	LIFR, CNTFR	103	4	16881	81.9466	0.99529	0.53487	26.5705
GOTERM_MF_DIRECT	GO:0005178	integrin binding	4	3.57143	0.0257613	WISP1, COL3A1, DST, COL5A1	103	105	16881	6.24355	0.996874	0.513726	28.2847
GOTERM_MF_DIRECT	GO:0005024	transforming growth factor beta-activated receptor activity	2	1.78571	0.0415443	TGFBR2, TGFBR3	103	7	16881	46.8266	0.999915	0.64723	41.7559
GOTERM_MF_DIRECT	GO:0050431	transforming growth factor beta binding	2	1.78571	0.092456	TGFBR2, TGFBR3	103	16	16881	20.4867	1	0.882814	70.9404

## Sheet: LUSC
Category	Term ID	Term Name	Count	%	PValue	Genes	List Total	Pop Hits	Pop Total	Fold Enrichment	Bonferroni	Benjamini	FDR
GOTERM_BP_DIRECT	GO:0051301	cell division	25	7.26744	3.93218e-08	KIFC1, NR3C1, CCNE2, KIF2C, TUBB, CDCA8, CDCA7, EVI5, NCAPG, TUBA1A, CCNA2, HELLS, KIF14, PARD6B, CDK1, KIF11, CCNF, CENPF, BIRC5, CDC20, CDK4, UBE2C, CCNB1, CCND3, ZWINT	312	350	16792	3.84432	7.38043e-05	7.38043e-05	6.71056e-05
GOTERM_BP_DIRECT	GO:0000122	negative regulation of transcription from RNA polymerase II promoter	33	9.59302	4.37089e-06	E2F1, CREBRF, E2F8, EZH2, EDN1, FHL2, ZEB2, CBX2, CBX7, HOXC8, CRY2, OSR1, GATA6, BCL11A, SOX17, TCF3, DNMT3B, TWIST1, CIITA, TXNIP, DNMT3A, JARID2, KLF10, FNIP2, SMO, PDE2A, HDAC1, TRPS1, ZBTB4, LRP8, ZFPM2, PARP1, NFIB	312	720	16792	2.46677	0.00817061	0.00409369	0.007459
GOTERM_BP_DIRECT	GO:0007018	microtubule-based movement	9	2.61628	0.000125933	KIF23, KIF14, KIFC1, KIF2C, DNAH9, KIF11, KIF6, RACGAP1, AP2M1	312	81	16792	5.98006	0.210528	0.0757724	0.214697
GOTERM_BP_DIRECT	GO:0042493	response to drug	17	4.94186	0.000184254	TXNIP, DNMT3A, CDK1, LDHA, RPH3AL, CENPF, CDK4, CBX7, RAD51, CCNB1, HDAC1, GATA6, OXCT1, LRP8, COL1A1, IGFBP2, DNMT3B	312	304	16792	3.0097	0.292401	0.0828364	0.313979
GOTERM_BP_DIRECT	GO:0071456	cellular response to hypoxia	9	2.61628	0.000408713	CCNB1, E2F1, DNMT3A, PTGIS, GATA6, EDN1, CCNA2, TWIST1, ANGPT4	312	96	16792	5.04567	0.53574	0.142267	0.695214
GOTERM_BP_DIRECT	GO:0008283	cell proliferation	18	5.23256	0.000495185	CDK1, LIPA, MKI67, KLF10, E2F8, FSCN1, CENPF, CSGALNACT1, KIF2C, PLCE1, EVI5, CSE1L, PCNA, WDR12, GNG2, IL5RA, EMP2, TFDP1	312	366	16792	2.64691	0.605325	0.143541	0.841717
GOTERM_BP_DIRECT	GO:0007080	mitotic metaphase plate congression	6	1.74419	0.000565612	KIF14, CCNB1, KIFC1, KIF2C, CDCA8, CEP55	312	37	16792	8.72765	0.654221	0.140761	0.960887
GOTERM_BP_DIRECT	GO:0007507	heart development	12	3.48837	0.000624237	NTRK3, PLCE1, OSR1, KCNAB1, OXCT1, TRPS1, EDN1, COL3A1, PCNA, PDLIM3, CAD, IFT140	312	183	16792	3.52921	0.690271	0.136281	1.05998
GOTERM_BP_DIRECT	GO:0006260	DNA replication	11	3.19767	0.000633142	EXO1, CLSPN, CDK1, GINS2, DTL, RRM2, PCNA, CHEK1, FEN1, CDT1, NFIB	312	155	16792	3.81952	0.695409	0.123735	1.07503
GOTERM_BP_DIRECT	GO:0060045	positive regulation of cardiac muscle cell proliferation	5	1.45349	0.000648568	CCNB1, CDK1, GATA6, TGFBR3, ZFPM2	312	22	16792	12.2319	0.704107	0.114653	1.10108
GOTERM_CC_DIRECT	GO:0000775	chromosome, centromeric region	8	2.32558	6.61696e-05	DNMT3A, KIF2C, CDCA8, MKI67, CENPF, BIRC5, CBX1, HELLS	326	57	18224	7.84587	0.0214058	0.0214058	0.0895467
GOTERM_CC_DIRECT	GO:0005634	nucleus	130	37.7907	6.75917e-05	KIFC1, LDHA, CBX2, CBX1, KIAA1456, CBX7, CDCA8, CRY2, CDCA7, PTGIS, GATA6, HOXC4, CCNA2, TWIST1, DDX39A, DTL, ESCO2, ZFP69B, ZWINT, MLLT11, PARP15, NLE1, EMP2, CAV2, MCL1, ONECUT1, NT5C1B, CHEK1, SESN1, SESN3, TUBB, CSE1L, ZNF695, HOXA5, RNF165, FOLR1, HOXA10, ARNTL2, PABPC1, RUNX2, TCF3, DNMT3B, HELLS, TFDP1, GINS2, DNMT3A, PARD6B, SMAD9, MKI67, KLF10, CDC20, HDAC1, TRPS1, PCNA, PARP1, RPP40, ZM…	326	5415	18224	1.34206	0.0218608	0.0109908	0.0914704
GOTERM_CC_DIRECT	GO:0005874	microtubule	17	4.94186	0.00015586	KIF14, KIF23, KIFC1, DNAH9, KIF11, TTLL9, MAP1B, BIRC5, MID1IP1, RACGAP1, KIF2C, TUBB, NAV1, KIF6, STMN1, TUBA1A, TUBB3	326	311	18224	3.05573	0.049693	0.0168466	0.210805
GOTERM_CC_DIRECT	GO:0005667	transcription factor complex	13	3.77907	0.000186631	E2F2, SMAD9, GATA6, TRPS1, E2F8, HOXA10, ARNTL2, SOX17, PARP1, CDK4, TCF3, RUNX2, TFDP1	326	193	18224	3.76541	0.0592087	0.0151427	0.252375
GOTERM_CC_DIRECT	GO:0016324	apical plasma membrane	15	4.36047	0.000772668	F2RL2, PARD6B, SLC6A20, AQP5, PDE4D, NHS, SLC9A3R2, AMOTL2, CYP4A11, FOLR1, SLC5A8, SCNN1G, IGFBP2, SLC1A1, EMP2	326	291	18224	2.88154	0.223346	0.0492955	1.04103
GOTERM_CC_DIRECT	GO:0005654	nucleoplasm	72	20.9302	0.000949853	CREBRF, E2F1, KIF23, E2F2, CLSPN, XRCC2, EZH2, CAD, CBX2, CBX1, CBX7, CDT1, CCNE2, CDCA8, HOXC8, CDCA7, GATA6, SOX17, CCNA2, CIITA, DDX39A, CDK1, DTL, SOX12, RUNX1T1, SCAI, UBE2C, CDK4, CEP152, ESCO2, RAD51, CCND3, RRM2, ZFPM2, CARM1, SPATA13, KPNA2, MCL1, LMNB1, FHL2, ZNF367, CHEK1, NR3C1, MYBL2, DROSHA, CSE1L, BCL11A, WDR12, POLQ, RUNX2, DNMT3B, TCF3, FEN1, TFDP1, EXO1, DNMT3A, GINS2, KAT2B, SM…	326	2784	18224	1.44574	0.267103	0.0504733	1.27833
GOTERM_CC_DIRECT	GO:0000785	chromatin	8	2.32558	0.00106143	HDAC1, CENPF, CHEK1, CBX1, CDK4, ESCO2, RAD51, MYCN	326	89	18224	5.02488	0.293386	0.0483996	1.42749
GOTERM_CC_DIRECT	GO:0005819	spindle	9	2.61628	0.00147646	KIF23, KIFC1, KIF11, EVI5, CENPF, BIRC5, CDC20, NR3C1, CBX1	326	121	18224	4.15799	0.383168	0.0586072	1.98051
GOTERM_CC_DIRECT	GO:0005871	kinesin complex	6	1.74419	0.002491	KIF23, KIF14, KIFC1, KIF2C, KIF11, KIF6	326	53	18224	6.32851	0.557615	0.0866347	3.32028
GOTERM_CC_DIRECT	GO:0005581	collagen trimer	7	2.03488	0.00606974	C1QTNF6, COL3A1, COL1A1, SERPINH1, COL5A2, COL5A1, COL10A1	326	92	18224	4.2534	0.863421	0.18052	7.91202
GOTERM_MF_DIRECT	GO:0005515	protein binding	202	58.7209	3.72658e-07	LDHA, XRCC2, SYT2, EDN1, PDLIM3, TLDC1, AQP5, AMOTL2, CDCA8, CRY2, SERPINE2, KLRD1, CCNA2, COL10A1, TWIST1, OSBP2, LIFR, CEP152, CCR6, CD40LG, ZWINT, LMNB1, CHEK1, MYBL2, EPHB2, TK1, ADCYAP1, HOXA10, PABPC1, POLQ, FCHO2, DNMT3B, TCF3, DNMT3A, SMAD9, MKI67, ARHGEF39, KLF10, FOXRED2, CELSR3, CDC20, MYOZ3, FNIP2, NTRK3, KCNJ6, HSPA12B, TRPS1, PCNA, TGFBR3, IL5RA, PARP1, CREBRF, CLSPN, MARCKSL1, EZH2…	305	8785	16881	1.27265	0.00021351	0.00021351	0.000546918
GOTERM_MF_DIRECT	GO:0019901	protein kinase binding	19	5.52326	0.000169681	E2F1, KIF14, CAV2, KAT2B, KIF11, NCS1, RACGAP1, CEP152, CCNB1, CCNE2, CCND3, OSR1, GATA6, PIWIL1, ZBTB4, PARP1, PPP1R15A, CCNA2, EMP2	305	376	16881	2.79682	0.0926577	0.0474548	0.248738
GOTERM_MF_DIRECT	GO:0003682	chromatin binding	19	5.52326	0.000272137	EXO1, DNMT3A, CDK1, KAT2B, JARID2, EZH2, CENPF, CBX2, CBX1, CBX7, RAD51, HDAC1, GATA6, TRPS1, PCNA, POLQ, DNMT3B, RUNX2, HELLS	305	391	16881	2.68952	0.144403	0.0506571	0.39865
GOTERM_MF_DIRECT	GO:0008134	transcription factor binding	14	4.06977	0.00197199	E2F1, E2F2, KAT2B, FHL2, CENPF, HDAC1, GATA6, ZFPM2, SOX17, PARP1, APBB2, TCF3, TWIST1, TFDP1	305	284	16881	2.7284	0.677311	0.246305	2.85543
GOTERM_MF_DIRECT	GO:0003777	microtubule motor activity	7	2.03488	0.00319626	KIF23, KIF14, KIFC1, KIF2C, DNAH9, KIF11, KIF6	305	80	16881	4.84291	0.840289	0.307106	4.58973
GOTERM_MF_DIRECT	GO:0042826	histone deacetylase binding	7	2.03488	0.010332	KAT2B, HDAC1, HOXA10, CDC20, PARP1, DNMT3B, KPNA2	305	102	16881	3.79836	0.997397	0.629106	14.1375
GOTERM_MF_DIRECT	GO:0048407	platelet-derived growth factor binding	3	0.872093	0.0159692	COL3A1, COL1A1, COL5A1	305	11	16881	15.0948	0.999901	0.732261	21.0423
GOTERM_MF_DIRECT	GO:0031994	insulin-like growth factor I binding	3	0.872093	0.0189375	ITGA6, IGFBP2, IGFBP3	305	12	16881	13.8369	0.999983	0.745743	24.4666
GOTERM_MF_DIRECT	GO:0004693	cyclin-dependent protein serine/threonine kinase activity	4	1.16279	0.0229261	CCNB1, CDK1, CCND3, CDK4	305	34	16881	6.51148	0.999998	0.771591	28.8503
GOTERM_MF_DIRECT	GO:0001047	core promoter binding	5	1.45349	0.0281726	E2F1, E2F2, HDAC1, E2F8, EZH2	305	64	16881	4.32403	1	0.805528	34.256

## Sheet: STAD
Category	Term ID	Term Name	Count	%	PValue	Genes	List Total	Pop Hits	Pop Total	Fold Enrichment	Bonferroni	Benjamini	FDR
GOTERM_BP_DIRECT	GO:0051301	cell division	30	7.19424	1.86088e-09	KNTC1, AURKA, CHEK2, RCC1, CCNE1, CDCA8, OIP5, BUB1, TUBA1A, CCNA2, KIF11, DSN1, LIG1, CCNF, CDK6, BIRC5, CDC20, KNSTRN, TACC3, HMGA2, SMC2, CDC25A, NCAPD2, MAD2L1, CCNB2, TIMELESS, SPAG5, ZWINT, CKS2, UBE2S	381	350	16792	3.77773	4.11253e-06	4.11253e-06	3.23674e-06
GOTERM_BP_DIRECT	GO:0006260	DNA replication	16	3.83693	2.43348e-06	CLSPN, DTL, LIG1, DBF4, GINS4, CHEK1, CDC25A, CDT1, DNA2, TIMELESS, RRM2, PCNA, ORC6, ORC1, CHAF1B, NFIA	381	155	16792	4.54952	0.00536356	0.00268538	0.00423261
GOTERM_BP_DIRECT	GO:0045944	positive regulation of transcription from RNA polymerase II promoter	46	11.0312	5.02689e-06	E2F1, GLIS3, ONECUT1, THRB, E2F7, FOXM1, ONECUT2, SOX4, RORA, ZEB1, MYBL2, SOX9, MEIS1, CITED2, FOS, NLRC5, GALR1, MYOCD, POU5F1, HOXA5, FOXF2, HOXA10, PER1, SOX17, RUNX1, FOXD1, FGF2, CKAP2, EGR1, ZBTB7C, ESRRB, MET, ARID3A, NR4A3, HMGA2, RPS6KA5, ATF3, CDON, SIX1, HIF3A, NEUROD1, ZFPM2, ID4, PBX1, KLF2, NFIA	381	981	16792	2.06665	0.011048	0.00369631	0.00874323
GOTERM_BP_DIRECT	GO:0045893	positive regulation of transcription, DNA-templated	30	7.19424	6.62725e-06	E2F1, GDF7, FOXM1, SOX4, ZBTB16, RORA, CHEK2, SOX9, CITED2, CCNE1, FOS, RGMB, MYOCD, SMARCD3, FOXF2, SOX17, ATOH8, RUNX1, CCNA2, FGF2, EGR1, HMGA2, SFRP1, SIX1, CKS2, FOXE1, NEUROD1, BAMBI, KLF2, F2R	381	515	16792	2.56739	0.0145395	0.00365487	0.0115266
GOTERM_BP_DIRECT	GO:0035019	somatic stem cell population maintenance	10	2.39808	1.4784e-05	ASCL2, SFRP1, POU5F1, KLF10, SOX4, PBX1, KIT, HMGA2, SOX9, FGF2	381	65	16792	6.78054	0.0321448	0.00651326	0.0257116
GOTERM_BP_DIRECT	GO:0000122	negative regulation of transcription from RNA polymerase II promoter	36	8.63309	1.83278e-05	E2F1, GLIS3, THRB, E2F7, FOXM1, EZH2, ZBTB16, ZEB1, CBX7, CITED2, HOXC8, TSC22D3, CRY2, MYOCD, POU5F1, PER1, SOX17, TXNIP, EGR1, SATB1, KLF10, NR4A3, HMGA2, PKIA, ASCL2, ATF3, TIMELESS, BTG2, PLK1, SIX1, FOXE1, ZBTB4, ZFPM2, ID4, NFIA, VLDLR	381	720	16792	2.20367	0.0396955	0.00672808	0.0318739
GOTERM_BP_DIRECT	GO:0009952	anterior/posterior pattern specification	10	2.39808	7.96027e-05	ARC, HOXC8, BTG2, HOXA5, CDON, HOXA10, NEUROD1, HOXA9, PBX1, ZBTB16	381	80	16792	5.50919	0.161322	0.0248195	0.138368
GOTERM_BP_DIRECT	GO:0000082	G1/S transition of mitotic cell cycle	11	2.63789	0.000104833	CCNE1, RRM2, DBF4, PCNA, ID4, ORC6, CDK6, RCC1, ORC1, CDC25A, CDT1	381	102	16792	4.75302	0.206811	0.0285464	0.182187
GOTERM_BP_DIRECT	GO:0045892	negative regulation of transcription, DNA-templated	26	6.23501	0.00018547	E2F1, FOXM1, EZH2, ZEB1, ZBTB16, TCEAL7, SOX9, CITED2, CRY2, FOXF2, PER1, ATOH8, RUNX1, FOXD1, NACC2, KLF10, SMYD1, BIRC5, HMGA2, RPS6KA5, TIMELESS, SFRP1, FOXE1, ZBTB4, ID4, ZFPM2	381	499	16792	2.29641	0.3363	0.0445256	0.322109
GOTERM_BP_DIRECT	GO:0000070	mitotic sister chromatid segregation	6	1.43885	0.000211399	MAD2L1, DSN1, PLK1, SPAG5, ZWINT, KNSTRN	381	25	16792	10.5776	0.373271	0.0456493	0.367063
GOTERM_CC_DIRECT	GO:0030018	Z disc	12	2.8777	5.42507e-05	SLC8A1, JPH2, ATP2B4, ANK2, DMD, CFL2, PDLIM3, KY, FBXO32, MYOZ2, FBP2, PALLD	398	118	18224	4.6565	0.0181701	0.0181701	0.0737875
GOTERM_CC_DIRECT	GO:0005634	nucleus	152	36.4508	0.000200509	DLC1, THRB, PRR11, PTGS1, KNTC1, AURKA, ITPKB, RORA, TCEAL7, CBX7, CITED2, NLRC5, CDCA8, CRY2, MYOCD, OIP5, SMARCD3, FOXF2, ORC6, ATOH8, ORC1, CCNA2, SATB1, EMX1, DTL, LIG1, FBP2, PKIA, NCAPD2, ASCL2, ZNF195, MAD2L1, TIMELESS, CPE, SPAG5, ZWINT, SIX1, MNX1, GBP4, ONECUT1, HOXA13, CLU, ONECUT2, SOX5, SOX4, MYEF2, CHEK1, ASB16, RCC1, SOX9, TIMP3, MEIS1, HOXA5, RNF165, DMD, OSBPL1A, HOXA10, HOXA9, R…	398	5415	18224	1.2853	0.0655328	0.0333216	0.272465
GOTERM_CC_DIRECT	GO:0005654	nucleoplasm	88	21.1031	0.000247565	E2F1, CLSPN, XRCC2, THRB, DBF4, E2F7, EZH2, FERMT2, AURKA, ZEB1, RORA, CBX7, CDT1, FOS, CCNE1, HOXC8, CDCA8, FANCI, SMARCD3, OIP5, POU5F1, ORC6, SOX17, CCNA2, ORC1, EGR1, SATB1, DTL, LIG1, CDK6, HMGA2, RAD51, NCAPD2, PRKCB, TIMELESS, SPAG5, RRM2, ZFPM2, MCC, KPNA2, GLIS3, FGFR4, LMNB1, FOXM1, ONECUT2, OAS3, MKNK2, ZNF367, SOX4, MYEF2, CHEK1, CHEK2, MYBL2, SOX9, RCC1, TCF7L1, HJURP, OSBPL1A, ADAT2…	398	2784	18224	1.44735	0.0802811	0.0275102	0.336307
GOTERM_CC_DIRECT	GO:0000777	condensed chromosome kinetochore	9	2.15827	0.00061619	CENPN, MAD2L1, HJURP, SPAG5, ZWINT, KNTC1, BUB1, BIRC5, KNSTRN	398	87	18224	4.73679	0.188066	0.050751	0.83513
GOTERM_CC_DIRECT	GO:0000922	spindle pole	10	2.39808	0.000632023	CKAP2, KIF11, MAD2L1, DSN1, PLK1, SPAG5, KNTC1, CDC20, KNSTRN, TACC3	398	109	18224	4.20082	0.192402	0.0418378	0.856503
GOTERM_CC_DIRECT	GO:0000790	nuclear chromatin	13	3.11751	0.00110605	E2F1, NACC2, THRB, EZH2, RCC1, CBX7, RAD51, CITED2, TIMELESS, SMARCD3, POU5F1, HIST1H2AH, CHAF1B	398	193	18224	3.08423	0.312058	0.0604384	1.49443
GOTERM_CC_DIRECT	GO:0005667	transcription factor complex	13	3.11751	0.00110605	E2F7, NR4A3, ZEB1, MEIS1, TCF7L1, FOS, POU5F1, SIX1, FOXF2, HOXA10, HOXA9, PBX1, SOX17	398	193	18224	3.08423	0.312058	0.0604384	1.49443
GOTERM_CC_DIRECT	GO:0005737	cytoplasm	141	33.8129	0.00225719	DLC1, STIL, XRCC2, PRR11, FAM110B, PTGS1, TRIM50, PDLIM3, KNTC1, DNAJB13, CBX7, CITED2, NLRC5, CRY2, OIP5, SMARCD3, ATOH8, CCNA2, ORC1, LRRC4, ARC, EMX1, SOCS3, DTL, TACC3, PKIA, PNPLA3, CTNNA3, NCAPD2, ASCL2, NCAM1, TNS1, SPAG5, ZWINT, SIX1, MNX1, RAB15, STMN1, SSC5D, FGFR4, CLU, OAS3, AKAP12, MYEF2, SOX4, ASB16, RCC1, PRUNE2, RNF165, OSBPL1A, HOXA10, HOXA9, GNMT, RUNX1, CKAP2, KLF9, LPP, MYO1B,…	398	5222	18224	1.23635	0.534105	0.103371	3.02779
GOTERM_CC_DIRECT	GO:0042383	sarcolemma	8	1.91847	0.00253664	KCND3, SLC8A1, BVES, ANK2, DMD, SLMAP, KCNB1, SYNM	398	85	18224	4.30955	0.576192	0.101752	3.39667
GOTERM_CC_DIRECT	GO:0032133	chromosome passenger complex	3	0.719424	0.00453201	CDCA8, BIRC5, AURKA	398	5	18224	27.4734	0.784609	0.156832	5.99309
GOTERM_MF_DIRECT	GO:0005515	protein binding	237	56.8345	1.09436e-05	DLC1, XRCC2, GDF7, LDHD, PDLIM3, AURKA, SELENBP1, RORA, DNAJB13, CITED2, FAM124A, CDCA8, ATP2B4, CRY2, GRIN2D, CCNA2, RECK, LRRC4, EMX1, GRIN2A, CTNNA3, NCAPD2, PITPNM3, MAD2L1, SPAG5, ZWINT, RAB15, TRIML2, LMNB1, OAS3, AKAP12, CACNB2, CHEK1, CHEK2, ASB16, MYBL2, RCC1, EPHB2, DMD, HOXA10, POLQ, BMP1, KLF10, CELSR3, CDC20, SMYD1, GAS1, MYOZ2, EPHA4, FNBP1, EPHA7, SFRP1, PCNA, TGFBR3, KLF2, SYTL1, …	376	8785	16881	1.2112	0.00638159	0.00638159	0.0161056
GOTERM_MF_DIRECT	GO:0001077	transcriptional activator activity, RNA polymerase II core promoter proximal region sequence-specific binding	18	4.31655	2.21169e-05	EGR1, ONECUT1, ONECUT2, SOX4, NR4A3, HMGA2, MYBL2, SOX9, MEIS1, FOS, MYOCD, HOXA5, SIX1, HOXA10, NEUROD1, PBX1, FOXD1, NFIA	376	236	16881	3.42429	0.0128552	0.0064484	0.0325469
GOTERM_MF_DIRECT	GO:0003682	chromatin binding	23	5.51559	6.80757e-05	SATB1, EZH2, ARID3A, ZEB1, RCC1, SOX9, MEIS1, CBX7, RAD51, PRKCB, NCAPD2, CITED2, FOS, SMARCD3, SIX1, CKS2, PCNA, NEUROD1, PRKAA2, POLQ, ORC1, CHAF1B, NFIA	376	391	16881	2.64096	0.039043	0.0131875	0.100148
GOTERM_MF_DIRECT	GO:0043565	sequence-specific DNA binding	27	6.47482	0.000100398	E2F1, THRB, HOXA13, FOXM1, RORA, TCF7L1, FOS, HOXC8, HOXA5, POU5F1, FOXF2, HOXA10, HOXA9, SOX17, FOXD1, EGR1, EMX1, ESRRB, NR4A3, ATF3, SIX1, MNX1, FOXE1, ZBTB4, NEUROD1, PBX1, KLF2	376	518	16881	2.34015	0.057044	0.0145766	0.147664
GOTERM_MF_DIRECT	GO:0008134	transcription factor binding	17	4.07674	0.000639669	E2F1, ESRRB, RORA, ZEB1, HMGA2, FOS, MYOCD, SMARCD3, POU5F1, FOXF2, NEUROD1, PER1, ZFPM2, PBX1, SOX17, RUNX1, NFIA	376	284	16881	2.68745	0.312247	0.0721314	0.937349
GOTERM_MF_DIRECT	GO:0003700	transcription factor activity, sequence-specific DNA binding	37	8.8729	0.00155417	E2F1, POU6F1, THRB, E2F7, FOXM1, SOX5, ZNF367, SOX4, ZBTB16, ZEB1, RORA, MYBL2, SOX9, TCF7L1, CITED2, FOS, HOXC8, TSC22D3, POU5F1, HOXA5, FOXF2, ATOH8, RUNX1, FOXD1, EGR1, KLF9, ESRRB, KLF10, ASCL2, ATF3, SIX1, MNX1, FOXE1, NEUROD1, PBX1, KLF2, NFIA	376	961	16881	1.72858	0.597435	0.140711	2.26322
GOTERM_MF_DIRECT	GO:0019901	protein kinase binding	19	4.55635	0.00195737	E2F1, SLC12A7, KIF11, ACTA2, FOXM1, PPP1R12C, NCS1, AURKA, NBEA, NR4A3, CHEK2, CDC25A, CCNE1, ANK2, PLK1, TOM1L2, ZBTB4, CKS2, CCNA2	376	376	16881	2.26869	0.682152	0.151038	2.84251
GOTERM_MF_DIRECT	GO:0001046	core promoter sequence-specific DNA binding	6	1.43885	0.00253402	MYOCD, KLF10, SOX4, RORA, NR4A3, SOX9	376	43	16881	6.2646	0.773336	0.169341	3.66546
GOTERM_MF_DIRECT	GO:0035035	histone acetyltransferase binding	5	1.19904	0.00321775	EGR1, MYOCD, PCNA, NR4A3, CITED2	376	28	16881	8.01719	0.848234	0.189003	4.63279
GOTERM_MF_DIRECT	GO:0003677	DNA binding	54	12.9496	0.00523889	E2F1, POU6F1, CLSPN, THRB, ZMAT4, E2F7, EZH2, RORA, ZEB1, CDT1, FOS, CRY2, FANCI, POU5F1, FOXF2, ORC6, ORC1, EGR1, SATB1, EMX1, LIG1, HMGA2, RAD51, SIX1, MNX1, ZFPM2, GLIS3, ONECUT1, HOXA13, FOXM1, SOX5, ZNF367, MYEF2, ZBTB16, MEIS1, TCF7L1, HJURP, HOXA5, POLQ, RUNX1, FOXD1, ASXL3, ZBTB47, KLF8, KLF9, ARID3A, SMYD1, NR4A3, DNA2, HIF3A, PCNA, HIST1H2AH, PBX1, NFIA	376	1674	16881	1.44827	0.953709	0.264556	7.43962

[truncated: 1 more sheets: THCA]
