# Supplementary material for: Integrated Analysis of MicroRNA (miRNA) and mRNA Profiles Reveals Reduced Correlation between MicroRNA and Target Gene in Cancer
Source: Biomed Res Int. 2018 Dec 6;2018:1972606. doi: 10.1155/2018/1972606 (PMC6304515; doi:10.1155/2018/1972606)
Supplement: Supplementary Materials — Figure S1. Expression density distribution of mRNAs and miRNAs before and after filtering. Figure S2. Distribution of the PCC values of critical miRNA-target gene pairs in healthy controls and 4 clinically staged tumors. Figure S3: Simple correlations coefficients (Cor) and partial correlation coefficients (Pcor) of critical pairs in normal and tumor samples of LIHC. Figure S4: Simple correlations coefficients (Cor) and partial correlation coefficients (Pcor) of critical pairs in normal and tumor samples of LUAD. Figure S5: Simple correlations coefficients (Cor) and partial correlation coefficients (Pcor) of critical pairs in tumor samples of LIHC. Figure S6: Simple correlations coefficients (Pearson correlation coefficient) and partial correlation coefficients (given CNAs effects) of critical pairs in cancer samples of LUAD. Table S1: Sample sizes for each cancer type. Table S2. Sample clinical and grouping information for each cancer type. Table S3. List of DEMs for each cancer type. Table S4. List of DEGs for each cancer type. Table S5. Frequency of DEMs and DEGs in 11 cancer types. Table S6. List of critical miRNA-target gene pairs for each cancer type. Table S7: Interactional references and gene functional references for some critical miRNA-target pairs. Table S8. Frequency of critical miRNA-target pairs in 11 cancer types. Table S9. List of the significantly GO annotation terms (p < 0.05) for the critical target genes in each cancer type. Table S10. List of the significantly KEGG pathway terms (p < 0.05) for the critical target genes in each cancer type. Table S11. Partial and simple correlation coefficients for each critical pair in normal and tumor samples of LUAD and LIHC when controlling methylation or CNAs effect. [file 1972606.f1.zip › 1972606.f1/Table S10_BMRI_2598529.xlsx]

## Sheet: Sheet2
Cancer_Type	TermIDs	TermNames	Count	%	PValue	Genes	List Total	Pop Hits	Pop Total	Fold Enrichment	Bonferroni	Benjamini	FDR
BLCA	hsa00260	Glycine, serine and threonine metabolism	5	0.74184	0.0428561	CHDH, MAOB, DMGDH, PSAT1, AOC3	237	39	6910	3.73796	0.999929	0.154242	42.693
BLCA	hsa04010	MAPK signaling pathway	19	2.81899	0.00268797	PRKCA, FGFR1, FGF7, TGFBR2, CACNB2, FGF10, GNG12, SRF, FLNA, PRKCB, RPS6KA5, DUSP3, HSPA2, RPS6KA2, CACNA1E, PRKACB, FGF2, MYC, AKT3	237	255	6910	2.17242	0.443877	0.0207379	3.36333
BLCA	hsa04012	ErbB signaling pathway	9	1.33531	0.00941286	PRKCA, ERBB2, STAT5B, ABL1, CAMK2A, MYC, AKT3, PIK3R1, PRKCB	237	87	6910	3.01615	0.872765	0.058837	11.3266
BLCA	hsa04014	Ras signaling pathway	14	2.07715	0.0454632	PRKCA, FGFR1, FGF7, FGF10, GNG12, PRKCB, KSR2, PRKACB, RASA3, ABL1, FGF2, AKT3, PIK3R1, PLA2G2F	237	226	6910	1.80613	0.999961	0.160447	44.6457
BLCA	hsa04020	Calcium signaling pathway	21	3.11573	2.57437e-06	PRKCA, SLC8A1, TACR2, ERBB2, ITPKB, ITPR3, ITPR1, PRKCB, EDNRA, GNAL, ATP2B4, ADCY9, P2RX1, CHRM3, CHRM2, RYR2, CACNA1E, PRKACB, CAMK2A, MYLK, HTR2A	237	179	6910	3.42055	0.000561055	9.35311e-05	0.00327215
BLCA	hsa04022	cGMP-PKG signaling pathway	23	3.41246	3.75096e-08	SLC8A1, MEF2A, ROCK1, ATP1B2, ROCK2, MRVI1, NPR1, ITPR3, PRKG1, SRF, ITPR1, KCNMB1, EDNRA, MEF2D, ATP2B4, PDE2A, ADCY9, KCNJ8, PDE5A, PPP1R12A, MYLK, AKT3, PIK3R1	237	166	6910	4.0397	8.17707e-06	4.08854e-06	4.76773e-05
BLCA	hsa04024	cAMP signaling pathway	20	2.96736	4.13399e-05	ROCK1, ATP1B2, ROCK2, NPR1, PDE4D, SOX9, VAV2, EDNRA, HTR1B, ATP2B4, ADCY9, CHRM2, PPP1R12A, RYR2, PRKACB, CAMK2A, HCAR2, AKT3, PIK3R1, HCAR1	237	198	6910	2.94506	0.00897179	0.000900822	0.0525331
BLCA	hsa04068	FoxO signaling pathway	12	1.78042	0.00594368	GABARAPL1, CCNB2, SLC2A4, CCND2, PLK1, TGFBR2, SETD7, FBXO32, PRKAA2, SIRT1, AKT3, PIK3R1	237	134	6910	2.611	0.727356	0.0423947	7.2974
BLCA	hsa04071	Sphingolipid signaling pathway	11	1.63205	0.00772478	BID, PRKCA, ROCK1, SGMS2, FYN, ROCK2, BCL2, MS4A2, AKT3, PIK3R1, PRKCB	237	120	6910	2.67264	0.81558	0.0499384	9.38663
BLCA	hsa04110	Cell cycle	10	1.48368	0.0256247	CCNE1, E2F2, CCNB2, CCND2, PLK1, BUB1, CDC20, ABL1, CCNA2, MYC	237	124	6910	2.3513	0.996514	0.10907	28.1043
BLCA	hsa04114	Oocyte meiosis	12	1.78042	0.00117009	CCNE1, CPEB2, ADCY9, RPS6KA2, PLK1, CPEB3, BUB1, CDC20, PRKACB, ITPR3, CAMK2A, ITPR1	237	109	6910	3.20985	0.225261	0.0126804	1.47712
BLCA	hsa04150	mTOR signaling pathway	6	0.890208	0.0471067	PRKCA, RPS6KA2, PRKAA2, AKT3, PIK3R1, PRKCB	237	58	6910	3.01615	0.999973	0.160809	45.845
BLCA	hsa04151	PI3K-Akt signaling pathway	23	3.41246	0.00334235	PRKCA, FGFR1, FGF7, ITGA1, FGF10, ITGA3, LPAR1, ITGB3, GNG12, LAMA2, CCNE1, ITGA9, LAMA4, CCND2, ITGA5, CHRM2, BCL2, PRKAA2, MYB, FGF2, MYC, AKT3, PIK3R1	237	345	6910	1.94374	0.51802	0.0248533	4.1662
BLCA	hsa04261	Adrenergic signaling in cardiomyocytes	14	2.07715	0.00138946	PRKCA, SCN1B, ATP1B2, CACNB2, RPS6KA5, ATP2B4, ADCY9, BCL2, RYR2, SCN7A, PRKACB, CAMK2A, PIK3R1, AKT3	237	146	6910	2.79579	0.261485	0.0130924	1.7518
BLCA	hsa04270	Vascular smooth muscle contraction	19	2.81899	8.92986e-08	PRKCA, ROCK1, ROCK2, PPP1R12B, CALD1, PPP1R12C, MRVI1, NPR1, ITPR3, PRKG1, ITPR1, KCNMB1, PRKCB, EDNRA, ADCY9, PPP1R12A, PRKACB, MYLK, PLA2G2F	237	119	6910	4.65518	1.94669e-05	6.48901e-06	0.000113505
BLCA	hsa04310	Wnt signaling pathway	13	1.92878	0.00257277	PRKCA, SFRP1, CCND2, ROCK2, PRICKLE2, PRKACB, TBL1X, WNT7A, CAMK2A, MYC, DAAM2, FZD7, PRKCB	237	138	6910	2.74659	0.429697	0.0205847	3.22136
BLCA	hsa04390	Hippo signaling pathway	11	1.63205	0.0335316	CCND2, CTGF, BBC3, TGFBR2, WWTR1, WNT7A, MYC, FZD7, LATS2, CTNNA3, BMPR1A	237	151	6910	2.12396	0.99941	0.130892	35.1776
BLCA	hsa04510	Focal adhesion	24	3.56083	4.44704e-07	PRKCA, CAV1, ROCK1, ROCK2, PPP1R12B, ERBB2, PPP1R12C, ITGA1, ITGA3, ITGB3, VAV2, FLNA, PRKCB, LAMA2, ITGA9, LAMA4, CCND2, ITGA5, FYN, BCL2, PPP1R12A, MYLK, AKT3, PIK3R1	237	206	6910	3.39683	9.69408e-05	1.93889e-05	0.000565248
BLCA	hsa04512	ECM-receptor interaction	8	1.18694	0.0286441	LAMA2, ITGA9, LAMA4, ITGA5, HSPG2, ITGA1, ITGA3, ITGB3	237	87	6910	2.68102	0.998228	0.114708	30.8853
BLCA	hsa04540	Gap junction	9	1.33531	0.0100583	PRKCA, ADCY9, PRKACB, LPAR1, PRKG1, ITPR3, ITPR1, PRKCB, HTR2A	237	88	6910	2.98188	0.889619	0.059381	12.0582
BLCA	hsa04550	Signaling pathways regulating pluripotency of stem cells	11	1.63205	0.0211912	FGFR1, SMAD9, IL6ST, LIFR, WNT7A, FGF2, MYC, FZD7, AKT3, PIK3R1, BMPR1A	237	140	6910	2.29084	0.990622	0.0965254	23.8336
BLCA	hsa04611	Platelet activation	14	2.07715	0.000464447	ROCK1, ROCK2, ITGB3, ITPR3, PRKG1, ITPR1, P2RX1, ADCY9, FYN, PPP1R12A, PRKACB, AKT3, PIK3R1, MYLK	237	130	6910	3.13989	0.0963136	0.00630957	0.588741
BLCA	hsa04664	Fc epsilon RI signaling pathway	7	1.03858	0.0279617	PRKCA, FYN, MS4A2, VAV2, AKT3, PIK3R1, PRKCB	237	68	6910	3.00137	0.997935	0.114166	30.2656
BLCA	hsa04666	Fc gamma R-mediated phagocytosis	9	1.33531	0.00766125	PRKCA, MYO10, WASF3, GSN, CFL2, VAV2, AKT3, PIK3R1, PRKCB	237	84	6910	3.12387	0.812988	0.0510444	9.31287
BLCA	hsa04713	Circadian entrainment	12	1.78042	0.000362275	PRKCA, RPS6KA5, KCNJ6, ADCY9, RYR2, PRKACB, GNG12, PRKG1, ITPR3, CAMK2A, ITPR1, PRKCB	237	95	6910	3.68288	0.075951	0.00525217	0.4595
BLCA	hsa04720	Long-term potentiation	7	1.03858	0.0245429	PRKCA, RPS6KA2, PRKACB, ITPR3, CAMK2A, ITPR1, PRKCB	237	66	6910	3.09232	0.99556	0.106721	27.083
BLCA	hsa04723	Retrograde endocannabinoid signaling	9	1.33531	0.0217233	PRKCA, KCNJ6, ADCY9, MGLL, PRKACB, GNG12, ITPR3, ITPR1, PRKCB	237	101	6910	2.59807	0.99167	0.0968527	24.3582
BLCA	hsa04725	Cholinergic synapse	15	2.22552	2.19765e-05	PRKCA, KCNJ6, ADCY9, CHRM3, FYN, CHRM2, BCL2, GNG12, PRKACB, ITPR3, CAMK2A, PIK3R1, AKT3, ITPR1, PRKCB	237	111	6910	3.94002	0.00477947	0.000532184	0.02793
BLCA	hsa04726	Serotonergic synapse	12	1.78042	0.00135927	PRKCA, TRPC1, HTR1B, ALOX15, KCNJ6, MAOB, PRKACB, GNG12, ITPR3, ITPR1, PRKCB, HTR2A	237	111	6910	3.15201	0.256602	0.0133879	1.71405
BLCA	hsa04728	Dopaminergic synapse	11	1.63205	0.0119241	PRKCA, GNAL, KCNJ6, MAOB, PRKACB, GNG12, ITPR3, CAMK2A, AKT3, ITPR1, PRKCB	237	128	6910	2.5056	0.926837	0.0632855	14.1419
BLCA	hsa04750	Inflammatory mediator regulation of TRP channels	9	1.33531	0.0184428	PRKCA, ADCY9, PRKACB, ITPR3, CAMK2A, PIK3R1, ITPR1, PRKCB, HTR2A	237	98	6910	2.6776	0.982717	0.0881034	21.07
BLCA	hsa04810	Regulation of actin cytoskeleton	22	3.26409	9.1468e-06	FGFR1, FGF7, ROCK1, ROCK2, PPP1R12B, PPP1R12C, ITGA1, FGF10, ITGA3, GNG12, ITGB3, VAV2, ITGA9, CHRM3, GSN, ITGA5, CHRM2, CFL2, PPP1R12A, FGF2, MYLK, PIK3R1	237	211	6910	3.03997	0.00199203	0.00024922	0.0116256
BLCA	hsa04910	Insulin signaling pathway	10	1.48368	0.0461472	PRKAR2B, PPP1R3B, PYGM, SLC2A4, PRKACB, PRKAA2, ACACB, PPARGC1A, AKT3, PIK3R1	237	138	6910	2.11276	0.999966	0.160182	45.1478
BLCA	hsa04911	Insulin secretion	11	1.63205	0.000588644	PRKCA, CHRM3, ADCY9, ATP1B2, KCNN3, RYR2, PRKACB, ITPR3, CAMK2A, KCNMB1, PRKCB	237	85	6910	3.77314	0.120465	0.00752228	0.745633
BLCA	hsa04914	Progesterone-mediated oocyte maturation	11	1.63205	0.000709031	CCNB2, CPEB2, ADCY9, RPS6KA2, PLK1, CPEB3, BUB1, PRKACB, CCNA2, AKT3, PIK3R1	237	87	6910	3.68641	0.143262	0.00855341	0.897495
BLCA	hsa04915	Estrogen signaling pathway	9	1.33531	0.0194939	KCNJ6, HSPA2, ADCY9, FKBP5, PRKACB, ITPR3, AKT3, PIK3R1, ITPR1	237	99	6910	2.65056	0.986317	0.0909632	22.1376
BLCA	hsa04918	Thyroid hormone synthesis	8	1.18694	0.00953777	PRKCA, ADCY9, ATP1B2, PRKACB, ITPR3, ITPR1, PRKCB, IYD	237	70	6910	3.33213	0.876216	0.0579452	11.4687
BLCA	hsa04919	Thyroid hormone signaling pathway	10	1.48368	0.0156601	PRKCA, THRA, ATP1B2, PRKACB, ITGB3, RCAN2, MYC, AKT3, PIK3R1, PRKCB	237	114	6910	2.55755	0.967965	0.0769033	18.1781
BLCA	hsa04921	Oxytocin signaling pathway	19	2.81899	6.31631e-06	PRKCA, ROCK1, ROCK2, PPP1R12B, PPP1R12C, CACNB2, NPR1, ITPR3, ITPR1, PRKCB, KCNJ6, ADCY9, PPP1R12A, RYR2, PRKAA2, PRKACB, CAMK2A, MYLK, PIK3R1	237	158	6910	3.50612	0.00137601	0.000196689	0.00802816
BLCA	hsa04922	Glucagon signaling pathway	10	1.48368	0.00648624	PYGM, PRKACB, PRKAA2, ACACB, ITPR3, CAMK2A, SIRT1, PPARGC1A, AKT3, ITPR1	237	99	6910	2.94506	0.757949	0.0447302	7.93848
BLCA	hsa04923	Regulation of lipolysis in adipocytes	7	1.03858	0.0116063	ADCY9, NPR1, MGLL, PRKACB, PRKG1, AKT3, PIK3R1	237	56	6910	3.64451	0.921524	0.063172	13.7902
BLCA	hsa04925	Aldosterone synthesis and secretion	12	1.78042	8.56795e-05	PRKCA, PRKD1, PDE2A, LDLR, ADCY9, NPR1, PRKACB, ITPR3, CAMK2A, ITPR1, KCNK3, PRKCB	237	81	6910	4.31942	0.0185056	0.00169664	0.10885
BLCA	hsa04931	Insulin resistance	10	1.48368	0.0112598	PPP1R3B, PYGM, SLC2A4, RPS6KA2, MLXIP, PRKAA2, ACACB, PPARGC1A, AKT3, PIK3R1	237	108	6910	2.69964	0.915294	0.0628971	13.4053
BLCA	hsa04960	Aldosterone-regulated sodium reabsorption	5	0.74184	0.0428561	PRKCA, ATP1B2, NR3C2, PIK3R1, PRKCB	237	39	6910	3.73796	0.999929	0.154242	42.693
BLCA	hsa04970	Salivary secretion	10	1.48368	0.00252556	PRKCA, ATP2B4, CHRM3, ADCY9, ATP1B2, PRKACB, PRKG1, ITPR3, ITPR1, PRKCB	237	86	6910	3.39025	0.423781	0.0209794	3.16311
BLCA	hsa04971	Gastric acid secretion	10	1.48368	0.000782802	PRKCA, CHRM3, ADCY9, ATP1B2, PRKACB, ITPR3, CAMK2A, MYLK, ITPR1, PRKCB	237	73	6910	3.99399	0.156941	0.0089449	0.990448
BLCA	hsa04972	Pancreatic secretion	11	1.63205	0.00119751	PRKCA, TRPC1, ATP2B4, CHRM3, ADCY9, ATP1B2, RYR2, ITPR3, ITPR1, PRKCB, PLA2G2F	237	93	6910	3.44857	0.229884	0.0123617	1.51149
BLCA	hsa05032	Morphine addiction	9	1.33531	0.0121925	PRKCA, PDE7B, KCNJ6, PDE2A, ADCY9, PDE4D, PRKACB, GNG12, PRKCB	237	91	6910	2.88357	0.931044	0.0631449	14.4378
BLCA	hsa05161	Hepatitis B	11	1.63205	0.0263004	PRKCA, CCNE1, E2F2, BCL2, STAT5B, HSPG2, CCNA2, MYC, AKT3, PIK3R1, PRKCB	237	145	6910	2.21184	0.997003	0.109707	28.7355
BLCA	hsa05162	Measles	10	1.48368	0.0378597	CCNE1, HSPA2, RAB9B, CCND2, FYN, BBC3, STAT5B, OAS3, AKT3, PIK3R1	237	133	6910	2.19219	0.999778	0.14185	38.7722
BLCA	hsa05200	Pathways in cancer	35	5.19288	3.78413e-07	BID, E2F2, CKS1B, FGFR1, FGF7, ERBB2, MITF, STAT5B, FGF10, GNG12, LPAR1, MMP1, EDNRA, CCNE1, BCL2, PRKACB, MYC, FGF2, AKT3, PIK3R1, PRKCA, ROCK1, ROCK2, TGFBR2, RUNX1T1, ITGA3, FZD7, CTNNA3, PRKCB, RAD51, LAMA2, LAMA4, ADCY9, ABL1, WNT7A	237	393	6910	2.5966	8.24905e-05	2.06233e-05	0.000480987
BLCA	hsa05203	Viral carcinogenesis	13	1.92878	0.0477742	CCNE1, HIST1H2BD, GSN, IL6ST, CCND2, C3, STAT5B, CDC20, PRKACB, HIST3H2BB, SRF, CCNA2, PIK3R1	237	205	6910	1.84892	0.999977	0.160499	46.3253
BLCA	hsa05205	Proteoglycans in cancer	28	4.1543	6.22746e-10	FGFR1, CAV1, ERBB2, PPP1R12B, PPP1R12C, ITGB3, SDC2, ANK2, PPP1R12A, PRKACB, MYC, FGF2, CAMK2A, PIK3R1, AKT3, PRKCA, ROCK1, ROCK2, HSPG2, ITPR3, FZD7, FLNA, ITPR1, PRKCB, ITGA5, HSPB2, WNT7A, PLAU	237	200	6910	4.08186	1.35759e-07	1.35759e-07	7.91552e-07
BLCA	hsa05206	MicroRNAs in cancer	21	3.11573	0.00168454	RECK, PRKCA, E2F2, ROCK1, ERBB2, BCL2L2, ZEB2, ITGB3, ZEB1, SIRT1, PRKCB, RPS6KA5, SPRY2, CCNE1, ITGA5, CCND2, BCL2, ZFPM2, ABL1, MYC, PLAU	237	285	6910	2.14835	0.307565	0.0151975	2.12018
BLCA	hsa05218	Melanoma	8	1.18694	0.0102824	FGFR1, E2F2, FGF7, MITF, FGF10, FGF2, AKT3, PIK3R1	237	71	6910	3.2852	0.894933	0.0590792	12.3109
BLCA	hsa05220	Chronic myeloid leukemia	7	1.03858	0.0357103	E2F2, STAT5B, TGFBR2, ABL1, MYC, AKT3, PIK3R1	237	72	6910	2.83462	0.999639	0.136534	37.0107
BLCA	hsa05222	Small cell lung cancer	10	1.48368	0.00232891	LAMA2, CCNE1, CKS1B, E2F2, LAMA4, BCL2, ITGA3, MYC, AKT3, PIK3R1	237	85	6910	3.43013	0.39848	0.0201265	2.92018
BLCA	hsa05223	Non-small cell lung cancer	6	0.890208	0.0414518	PRKCA, E2F2, ERBB2, AKT3, PIK3R1, PRKCB	237	56	6910	3.12387	0.999902	0.151942	41.6151
BLCA	hsa05410	Hypertrophic cardiomyopathy (HCM)	11	1.63205	0.000291719	ITGA9, ITGA5, DMD, ITGA1, SGCD, CACNB2, RYR2, ITGA3, PRKAA2, ITGB3, SGCB	237	78	6910	4.11176	0.0616234	0.00453283	0.370162
BLCA	hsa05412	Arrhythmogenic right ventricular cardiomyopathy (ARVC)	11	1.63205	0.000131967	ITGA9, ITGA5, DMD, ITGA1, SGCD, CACNB2, RYR2, ITGA3, ITGB3, CTNNA3, SGCB	237	71	6910	4.51715	0.0283608	0.00221069	0.16761
BLCA	hsa05414	Dilated cardiomyopathy	12	1.78042	0.000119932	ITGA9, ADCY9, ITGA5, DMD, ITGA1, SGCD, CACNB2, RYR2, ITGA3, PRKACB, ITGB3, SGCB	237	84	6910	4.16516	0.0258079	0.00217653	0.152335
BLCA	hsa05416	Viral myocarditis	7	1.03858	0.0126122	BID, CAV1, FYN, DMD, SGCD, ABL1, SGCB	237	57	6910	3.58058	0.937146	0.0637563	14.8988
BRCA	hsa00100	Steroid biosynthesis	4	0.544218	0.0474944	SQLE, FAXDC2, DHCR7, HSD17B7	287	20	6910	4.81533	0.999991	0.295972	46.5934
BRCA	hsa00565	Ether lipid metabolism	6	0.816327	0.0370776	PLA2G4A, PLD1, PLA2G10, ENPP2, PLA2G4F, PLA2G5	287	45	6910	3.21022	0.999876	0.266609	38.5551
BRCA	hsa00590	Arachidonic acid metabolism	7	0.952381	0.042186	CYP2U1, AKR1C3, PLA2G4A, PTGIS, PLA2G10, PLA2G4F, PLA2G5	287	62	6910	2.71833	0.999965	0.289609	42.627
BRCA	hsa03320	PPAR signaling pathway	9	1.22449	0.00609731	PPARA, LPL, CD36, SCD, PPARG, ACSL4, ACADL, ADIPOQ, MMP1	287	67	6910	3.23418	0.76674	0.135462	7.58097
BRCA	hsa03440	Homologous recombination	5	0.680272	0.0301925	BLM, EME1, BRCA2, RAD54B, RAD51	287	29	6910	4.15115	0.999322	0.253128	32.6447
BRCA	hsa03460	Fanconi anemia pathway	8	1.08844	0.00581497	BLM, EME1, BRCA2, BRIP1, FANCA, RMI1, RAD51, REV3L	287	53	6910	3.63421	0.750427	0.142919	7.24198
BRCA	hsa04010	MAPK signaling pathway	20	2.72109	0.00914289	PTPN7, MEF2C, EGFR, FGF7, TGFBR2, CACNG4, CACNB3, MAPK10, CACNG1, FOS, RPS6KA3, PLA2G4A, DUSP1, RASGRP1, RRAS2, MAP3K8, PLA2G4F, CACNA1E, EGF, FGF2	287	255	6910	1.88837	0.887636	0.154777	11.1657
BRCA	hsa04014	Ras signaling pathway	19	2.58503	0.00566407	EGFR, PLD1, FGF7, PLA2G10, EFNA1, IGF1, MAPK10, KDR, PLA2G4A, RASGRP1, RRAS2, PAK4, PLA2G4F, CALML5, SHC3, EGF, FGF2, PLA2G5, ANGPT4	287	226	6910	2.02414	0.741247	0.175622	7.06033
BRCA	hsa04068	FoxO signaling pathway	15	2.04082	0.00122851	EGFR, GABARAPL1, IL6, TGFBR2, FOXO1, IGF1, MAPK10, CCNB1, PLK4, CCND1, PLK1, BCL6, CAT, EGF, KLF2	287	134	6910	2.69515	0.253654	0.0705308	1.57209
BRCA	hsa04110	Cell cycle	18	2.44898	1.19723e-05	CDC7, CDC6, E2F5, CDC14B, TTK, CHEK1, CDC20, ANAPC11, CDC25A, CCNB1, CCNE1, CCND1, MAD2L1, PLK1, BUB1, BUB1B, ORC1, CCNA2	287	124	6910	3.495	0.00284537	0.00284537	0.0154316
BRCA	hsa04114	Oocyte meiosis	10	1.36054	0.0361497	CCNE1, RPS6KA3, MAD2L1, PLK1, BUB1, IGF1, AURKA, CDC20, ANAPC11, CALML5	287	109	6910	2.20887	0.999844	0.268724	37.7875
BRCA	hsa04115	p53 signaling pathway	8	1.08844	0.0201247	CCNB1, CCNE1, CCND1, BBC3, BAX, IGF1, CHEK1, PMAIP1	287	67	6910	2.87482	0.992081	0.214886	23.0535
BRCA	hsa04310	Wnt signaling pathway	12	1.63265	0.0274692	WNT7B, CCND1, PRICKLE2, LEF1, SOX17, FZD2, MAPK10, BAMBI, FZD5, FZD4, TCF7L2, FZD7	287	138	6910	2.09362	0.998679	0.241349	30.1655
BRCA	hsa04390	Hippo signaling pathway	18	2.44898	0.000153456	PARD6B, BMP2, TGFBR2, TEAD1, LEF1, BIRC5, FZD2, FZD5, FZD4, TCF7L2, CTNNA3, FZD7, LLGL2, WNT7B, CCND1, BBC3, ID1, YAP1	287	151	6910	2.87006	0.0358663	0.0121013	0.19763
BRCA	hsa04510	Focal adhesion	15	2.04082	0.046087	EGFR, LAMA2, CCND1, CAV1, PAK4, ERBB2, ITGA1, IGF1, LAMC2, MAPK10, EGF, SHC3, COL11A1, MYLK, KDR	287	206	6910	1.75315	0.999987	0.295961	45.5672
BRCA	hsa04520	Adherens junction	8	1.08844	0.0267902	PTPRB, EGFR, WASF3, ERBB2, TGFBR2, LEF1, TCF7L2, CTNNA3	287	71	6910	2.71286	0.99844	0.244973	29.5344
BRCA	hsa04550	Signaling pathways regulating pluripotency of stem cells	14	1.90476	0.00512108	BMP2, SMAD9, OTX1, LIFR, IGF1, FZD2, FZD5, FZD4, FZD7, WNT7B, ID1, ID4, FGF2, KLF4	287	140	6910	2.40767	0.705344	0.184259	6.40397
BRCA	hsa04914	Progesterone-mediated oocyte maturation	10	1.36054	0.00950808	CCNB1, RPS6KA3, MAD2L1, PLK1, BUB1, IGF1, MAPK10, ANAPC11, CCNA2, CDC25A	287	87	6910	2.76743	0.897075	0.149908	11.5868
BRCA	hsa04917	Prolactin signaling pathway	8	1.08844	0.0267902	FOS, CCND1, PRLR, SOCS3, ESR1, ESR2, MAPK10, SHC3	287	71	6910	2.71286	0.99844	0.244973	29.5344
BRCA	hsa04921	Oxytocin signaling pathway	15	2.04082	0.00566852	EGFR, MEF2C, CACNG4, NPR1, RCAN1, CACNB3, CACNG1, KCNJ3, FOS, PLA2G4A, CCND1, KCNJ6, PLA2G4F, CALML5, MYLK	287	158	6910	2.28576	0.741522	0.155591	7.06568
BRCA	hsa04931	Insulin resistance	10	1.36054	0.0343579	PPARA, RPS6KA3, IL6, CD36, PYGL, SOCS3, FOXO1, TRIB3, CREB5, MAPK10	287	108	6910	2.22932	0.999757	0.273878	36.2801
BRCA	hsa04975	Fat digestion and absorption	6	0.816327	0.021323	ABCG8, CD36, DGAT2, PLA2G10, ABCA1, PLA2G5	287	39	6910	3.7041	0.994082	0.216727	24.2577
BRCA	hsa05020	Prion diseases	5	0.680272	0.0457805	NCAM2, IL6, BAX, PRNP, C8G	287	33	6910	3.64798	0.999986	0.302167	45.3414
BRCA	hsa05166	HTLV-I infection	18	2.44898	0.0361191	IL6, KAT2B, TGFBR2, CHEK1, CDC20, ANAPC11, FZD2, FZD5, FZD4, FZD7, FOS, WNT7B, CCND1, MAD2L1, RRAS2, BAX, BUB1B, TERT	287	256	6910	1.69289	0.999842	0.276949	37.7621
BRCA	hsa05200	Pathways in cancer	34	4.62585	6.91525e-05	FGF7, ERBB2, MITF, PPARG, FOXO1, TCF7L2, MMP1, TPM3, CCNE1, FOS, RASGRP1, HHIP, EGF, FGF2, EGFR, IL6, BMP2, TGFBR2, BRCA2, IGF1, LEF1, BIRC5, FZD2, MAPK10, FZD5, FZD4, FZD7, CTNNA3, RAD51, LAMA2, CCND1, WNT7B, BAX, LAMC2	287	393	6910	2.08297	0.0163241	0.00819566	0.0891035
BRCA	hsa05205	Proteoglycans in cancer	17	2.31293	0.008532	EGFR, CAV1, ERBB2, ESR1, IGF1, TLR4, FZD2, FZD5, FZD4, FZD7, KDR, PLAUR, WNT7B, CCND1, RRAS2, FGF2, TWIST1	287	200	6910	2.04652	0.869884	0.169223	10.4571
BRCA	hsa05210	Colorectal cancer	8	1.08844	0.0135431	FOS, CCND1, BAX, TGFBR2, LEF1, BIRC5, MAPK10, TCF7L2	287	62	6910	3.10667	0.961042	0.183583	16.1188
BRCA	hsa05212	Pancreatic cancer	8	1.08844	0.0172702	EGFR, CCND1, ERBB2, TGFBR2, BRCA2, MAPK10, EGF, RAD51	287	65	6910	2.96328	0.984176	0.205741	20.1136
BRCA	hsa05213	Endometrial cancer	7	0.952381	0.0196227	EGFR, CCND1, ERBB2, LEF1, EGF, TCF7L2, CTNNA3	287	52	6910	3.24109	0.991055	0.21983	22.5439
BRCA	hsa05215	Prostate cancer	10	1.36054	0.0102193	EGFR, CCNE1, CCND1, ERBB2, FOXO1, IGF1, LEF1, CREB5, EGF, TCF7L2	287	88	6910	2.73598	0.913248	0.150392	12.4017
BRCA	hsa05216	Thyroid cancer	5	0.680272	0.0301925	CCND1, PPARG, LEF1, TCF7L2, TPM3	287	29	6910	4.15115	0.999322	0.253128	32.6447
BRCA	hsa05217	Basal cell carcinoma	9	1.22449	0.00174559	WNT7B, BMP2, LEF1, HHIP, FZD2, FZD5, FZD4, TCF7L2, FZD7	287	55	6910	3.93982	0.340196	0.0797985	2.22692
BRCA	hsa05410	Hypertrophic cardiomyopathy (HCM)	9	1.22449	0.014849	IL6, DMD, ITGA1, CACNG4, IGF1, CACNB3, CACNG1, TPM3, SGCB	287	78	6910	2.77808	0.971577	0.188966	17.539
BRCA	hsa05412	Arrhythmogenic right ventricular cardiomyopathy (ARVC)	9	1.22449	0.00863002	DMD, ITGA1, CACNG4, LEF1, CACNB3, CACNG1, TCF7L2, CTNNA3, SGCB	287	71	6910	3.05197	0.87291	0.157941	10.5712
BRCA	hsa05414	Dilated cardiomyopathy	9	1.22449	0.0223505	ADRB1, DMD, ITGA1, CACNG4, IGF1, CACNB3, CACNG1, TPM3, SGCB	287	84	6910	2.57964	0.995391	0.216932	25.2765
HNSC	hsa00071	Fatty acid degradation	5	1.47493	0.0128748	ACADSB, ACSL1, HADH, ACAT1, HADHB	145	44	6910	5.41536	0.927962	0.354949	15.0253
HNSC	hsa00280	Valine, leucine and isoleucine degradation	5	1.47493	0.016127	ACADSB, HADH, ACAT1, PCCA, HADHB	145	47	6910	5.0697	0.963134	0.375932	18.4766
HNSC	hsa00380	Tryptophan metabolism	4	1.17994	0.0499957	KYNU, HADH, ACAT1, INMT	145	40	6910	4.76552	0.99997	0.524642	47.5032
HNSC	hsa01212	Fatty acid metabolism	5	1.47493	0.0173155	ACADSB, ACSL1, HADH, ACAT1, HADHB	145	48	6910	4.96408	0.971155	0.35804	19.7053
HNSC	hsa04110	Cell cycle	11	3.24484	0.000242906	CCNB1, CCNE1, CDK1, BUB1, CHEK1, CDK6, CDC20, CCNA2, MCM4, MCM5, CDC25B	145	124	6910	4.22747	0.0481197	0.0243564	0.304772
HNSC	hsa04114	Oocyte meiosis	9	2.65487	0.00188877	CCNE1, CDK1, AR, CPEB3, BUB1, IGF1, AURKA, CDC20, ITPR1	145	109	6910	3.93483	0.318721	0.120083	2.3474
HNSC	hsa04115	p53 signaling pathway	10	2.94985	8.82701e-06	CCNB1, CCNE1, CDK1, SERPINE1, IGF1, CHEK1, CDK6, CCNG1, CCNG2, SESN1	145	67	6910	7.11271	0.00179029	0.00179029	0.0110901
HNSC	hsa04640	Hematopoietic cell lineage	6	1.76991	0.0318029	TFRC, IL1B, ITGA3, KIT, IL7R, IL1A	145	85	6910	3.36389	0.998585	0.421167	33.3744
HNSC	hsa04914	Progesterone-mediated oocyte maturation	7	2.0649	0.00934424	CCNB1, CDK1, CPEB3, BUB1, IGF1, CCNA2, CDC25B	145	87	6910	3.83432	0.851296	0.379016	11.1267
HNSC	hsa05202	Transcriptional misregulation in cancer	9	2.65487	0.0237796	MEF2C, MMP9, HIST1H3B, PAX5, IGF1, PBX1, HIST1H3G, HIST1H3H, TLX1	145	168	6910	2.55296	0.992445	0.38649	26.095
HNSC	hsa05203	Viral carcinogenesis	11	3.24484	0.0103033	CCNE1, CDK1, HIST1H2BD, HIST1H2BE, C3, SCIN, HLA-A, CHEK1, CDK6, CDC20, CCNA2	145	205	6910	2.55711	0.877839	0.343271	12.2016
HNSC	hsa05323	Rheumatoid arthritis	6	1.76991	0.0361707	FOS, TNFRSF11A, CTLA4, IL1B, CXCL12, IL1A	145	88	6910	3.24922	0.999435	0.437457	37.0538
HNSC	hsa05410	Hypertrophic cardiomyopathy (HCM)	6	1.76991	0.0229493	TNNC1, DMD, CACNB2, IGF1, ITGA3, TPM1	145	78	6910	3.66578	0.991022	0.407655	25.3012
HNSC	hsa05414	Dilated cardiomyopathy	6	1.76991	0.0304246	TNNC1, DMD, CACNB2, IGF1, ITGA3, TPM1	145	84	6910	3.40394	0.998112	0.434582	32.1727
KICH	hsa01100	Metabolic pathways	29	11.6466	0.0265105	GALNT3, SC5D, SORD, CYC1, AGMAT, CERS2, DHCR7, CPOX, UGT2A1, FUT1, DAO, B4GALT6, COX17, B4GALT7, NDUFA4, ACSM2B, PLA2G16, ACY1, CYCS, CYP1A2, NDUFA12, ATP6V1A, RDH11, G6PD, NNT, LIPG, COX6A1, XYLB, AOC3	111	1228	6910	1.47013	0.995605	0.836203	28.6315
KICH	hsa04024	cAMP signaling pathway	9	3.61446	0.0133487	ADRB1, CAMK4, TIAM1, ADCYAP1R1, CALM3, PDE3A, GNAS, PDE4C, CNGA4	111	198	6910	2.82965	0.933769	0.933769	15.5249
KICH	hsa04152	AMPK signaling pathway	6	2.40964	0.0446394	CPT1B, HNF4A, PFKFB2, ADIPOR2, IGF1, PPARGC1A	111	122	6910	3.06159	0.999901	0.841962	43.6345
KICH	hsa04924	Renin secretion	5	2.00803	0.0185906	ADRB1, ADCYAP1R1, CALM3, PDE3A, GNAS	111	64	6910	4.86346	0.977419	0.84973	20.9895
KICH	hsa05414	Dilated cardiomyopathy	5	2.00803	0.0444455	ADRB1, ITGB8, ITGA8, IGF1, GNAS	111	84	6910	3.70549	0.999897	0.89933	43.4908
KIRC	hsa00071	Fatty acid degradation	5	1.05932	0.0423949	CPT1B, ACADSB, ACAT1, ACSL6, ACSBG1	209	44	6910	3.75707	0.999965	0.326237	42.7668
KIRC	hsa00650	Butanoate metabolism	4	0.847458	0.0462529	L2HGDH, ALDH5A1, OXCT1, ACAT1	209	27	6910	4.8981	0.999987	0.340113	45.667
KIRC	hsa01212	Fatty acid metabolism	6	1.27119	0.0141029	CPT1B, ACADSB, SCD, ACAT1, ACSL6, ACSBG1	209	48	6910	4.13278	0.965479	0.189729	16.7202
KIRC	hsa04012	ErbB signaling pathway	7	1.48305	0.0466137	PIK3CG, PAK6, ERBB2, BTC, TGFA, SHC3, MYC	209	87	6910	2.66018	0.999988	0.323018	45.9312
KIRC	hsa04060	Cytokine-cytokine receptor interaction	23	4.87288	1.30836e-06	FLT1, IL2RA, IL7, OSMR, MET, IL21R, TNFRSF13C, FASLG, CCL5, TNFSF9, CXCL10, TNFSF8, IL12RB2, CCR9, IFNAR2, CCR6, CCR5, PRLR, CCR4, CCR2, VEGFA, NGFR, BMP7	209	230	6910	3.30622	0.000310034	0.000310034	0.00168539
KIRC	hsa04110	Cell cycle	10	2.11864	0.0122037	E2F1, CCNE2, E2F2, CDC6, CCND2, PKMYT1, ORC6, CDC20, CHEK2, MYC	209	124	6910	2.66631	0.945528	0.21534	14.6297
KIRC	hsa04151	PI3K-Akt signaling pathway	21	4.44915	0.00355235	PIK3CG, FLT1, IL2RA, IL7, EFNA1, OSMR, MET, FASLG, CREB5, COL5A3, COL5A1, DDIT4, CCNE2, IFNAR2, PRLR, CCND2, ITGA5, VEGFA, NGFR, MYB, MYC	209	345	6910	2.01248	0.569757	0.190106	4.48071
KIRC	hsa04510	Focal adhesion	12	2.54237	0.0462752	PIK3CG, PAK6, CAV1, FLT1, CCND2, ITGA5, ERBB2, VEGFA, MET, COL5A3, SHC3, COL5A1	209	206	6910	1.92595	0.999987	0.330376	45.6834
KIRC	hsa04514	Cell adhesion molecules (CAMs)	13	2.75424	0.00112548	CLDN16, TIGIT, VCAM1, ICAM1, OCLN, HLA-DRB1, CD99, NRXN1, HLA-E, CDH4, HLA-DOB, SPN, CD28	209	142	6910	3.02682	0.234242	0.124924	1.44017
KIRC	hsa04612	Antigen processing and presentation	7	1.48305	0.0263863	HSPA2, HLA-DRB1, CTSS, HLA-E, HLA-DOB, KLRD1, B2M	209	76	6910	3.0452	0.998231	0.240841	29.1402
KIRC	hsa04630	Jak-STAT signaling pathway	11	2.33051	0.0118697	PIK3CG, IL12RB2, IFNAR2, STAT4, IL2RA, PRLR, CCND2, OSMR, IL7, IL21R, MYC	209	145	6910	2.50817	0.940984	0.226839	14.2571
KIRC	hsa04668	TNF signaling pathway	10	2.11864	0.0044849	PIK3CG, VCAM1, ICAM1, MMP9, EDN1, CREB5, CCL5, MAP3K14, TNFAIP3, CXCL10	209	106	6910	3.11908	0.65538	0.162682	5.62588
KIRC	hsa04670	Leukocyte transendothelial migration	9	1.90678	0.0255398	PIK3CG, CLDN16, VCAM1, ICAM1, OCLN, MMP9, SIPA1, CD99, RHOH	209	118	6910	2.52169	0.997827	0.243239	28.3424
KIRC	hsa04672	Intestinal immune network for IgA production	6	1.27119	0.0129419	CCR9, HLA-DRB1, TNFRSF13C, MAP3K14, HLA-DOB, CD28	209	47	6910	4.22071	0.954372	0.197896	15.4479
KIRC	hsa04940	Type I diabetes mellitus	5	1.05932	0.0365999	HLA-DRB1, FASLG, HLA-E, HLA-DOB, CD28	209	42	6910	3.93598	0.999855	0.297757	38.1412
KIRC	hsa05150	Staphylococcus aureus infection	6	1.27119	0.0225517	ICAM1, MBL2, HLA-DRB1, FPR1, HLA-DOB, PTAFR	209	54	6910	3.67358	0.99551	0.236847	25.4598
KIRC	hsa05161	Hepatitis B	12	2.54237	0.00419116	PIK3CG, E2F1, CCNE2, E2F2, STAT4, MMP9, TLR3, FASLG, CREB5, BIRC5, NFATC2, MYC	209	145	6910	2.73618	0.630422	0.180515	5.26655
KIRC	hsa05162	Measles	11	2.33051	0.0066266	PIK3CG, CCNE2, IFNAR2, TNFRSF10B, IL2RA, HSPA2, CCND2, FASLG, TNFAIP3, TLR7, CD28	209	133	6910	2.73447	0.793144	0.178782	8.20813
KIRC	hsa05164	Influenza A	13	2.75424	0.00609074	PIK3CG, ICAM1, HLA-DRB1, FASLG, TLR3, CCL5, TLR7, CXCL10, IFNAR2, TNFRSF10B, HSPA2, PYCARD, HLA-DOB	209	174	6910	2.47016	0.764941	0.186855	7.56823
KIRC	hsa05166	HTLV-I infection	18	3.81356	0.00176542	E2F1, PIK3CG, ICAM1, E2F2, IL2RA, ADCY2, HLA-DRB1, TNFRSF13C, CDC20, CHEK2, HLA-E, VCAM1, CCND2, MYB, NFATC2, MAP3K14, HLA-DOB, MYC	209	256	6910	2.32469	0.342147	0.130286	2.25047
KIRC	hsa05169	Epstein-Barr virus infection	12	2.54237	0.0280434	PIK3CG, ICAM1, CD38, POLR2F, HSPA2, CD44, MAP3K14, HLA-E, TNFAIP3, MYC, POLR3B, SPN	209	190	6910	2.08814	0.998819	0.244885	30.6782
KIRC	hsa05202	Transcriptional misregulation in cancer	12	2.54237	0.0122811	FLT1, CCND2, MMP9, SIX1, MET, PBX1, NGFR, SIX4, RUNX1, RUNX2, MYC, PLAU	209	168	6910	2.36159	0.94653	0.201707	14.7159
KIRC	hsa05205	Proteoglycans in cancer	13	2.75424	0.0173345	PIK3CG, CAV1, ANK1, CD44, ITGA5, MMP9, ERBB2, VEGFA, MET, FASLG, MYC, PLAU, PLAUR	209	200	6910	2.14904	0.984145	0.195972	20.1689
KIRC	hsa05212	Pancreatic cancer	7	1.48305	0.0130613	PIK3CG, E2F1, E2F2, ERBB2, VEGFA, TGFA, RAD51	209	65	6910	3.56054	0.955662	0.187572	15.5796
KIRC	hsa05215	Prostate cancer	7	1.48305	0.0488248	PIK3CG, E2F1, CCNE2, E2F2, ERBB2, TGFA, CREB5	209	88	6910	2.62995	0.999993	0.326624	47.5245
KIRC	hsa05219	Bladder cancer	6	1.27119	0.00730866	E2F1, E2F2, MMP9, ERBB2, VEGFA, MYC	209	41	6910	4.83837	0.824218	0.159578	9.0167
KIRC	hsa05323	Rheumatoid arthritis	8	1.69492	0.0163945	ICAM1, FLT1, HLA-DRB1, VEGFA, ATP6V1H, CCL5, HLA-DOB, CD28	209	88	6910	3.00565	0.980113	0.205826	19.1796
KIRC	hsa05330	Allograft rejection	5	1.05932	0.0242372	HLA-DRB1, FASLG, HLA-E, HLA-DOB, CD28	209	37	6910	4.46786	0.997017	0.241872	27.0987
KIRC	hsa05332	Graft-versus-host disease	5	1.05932	0.0164767	HLA-DRB1, FASLG, HLA-E, HLA-DOB, CD28	209	33	6910	5.00942	0.980503	0.196478	19.2666
KIRC	hsa05416	Viral myocarditis	7	1.48305	0.00699224	ICAM1, CAV1, HLA-DRB1, DAG1, HLA-E, HLA-DOB, CD28	209	57	6910	4.06027	0.810427	0.168709	8.6424
KIRP	hsa00071	Fatty acid degradation	5	1.78571	0.00814719	ECI2, CYP4A11, ACADSB, CYP4A22, CPT1A	127	44	6910	6.18289	0.806851	0.421951	9.75288
KIRP	hsa04020	Calcium signaling pathway	8	2.85714	0.0447402	PLCE1, ADCY7, MYLK3, TBXA2R, CACNA1E, CAMK2A, MYLK, ITPR1	127	179	6910	2.43171	0.999899	0.566723	43.6829
KIRP	hsa04068	FoxO signaling pathway	8	2.85714	0.0110084	G6PC, PLK2, TGFBR2, FOXO1, FASLG, CAT, PRKAA2, SOD2	127	134	6910	3.24833	0.891929	0.359171	12.9648
KIRP	hsa04110	Cell cycle	7	2.5	0.0254136	CDC7, CDC6, BUB1, CDC20, CHEK2, CCNA2, WEE1	127	124	6910	3.0715	0.994339	0.437242	27.5964
KIRP	hsa04114	Oocyte meiosis	7	2.5	0.0143437	AR, ADCY7, CPEB4, BUB1, CDC20, CAMK2A, ITPR1	127	109	6910	3.49418	0.945194	0.383682	16.5759
KIRP	hsa04152	AMPK signaling pathway	10	3.57143	0.000360407	G6PC, CAB39L, HNF4A, FOXO1, CREB5, CFTR, PRKAA2, TBC1D1, CCNA2, CPT1A	127	122	6910	4.45979	0.0698922	0.035579	0.451162
KIRP	hsa04270	Vascular smooth muscle contraction	7	2.5	0.0212405	CYP4A11, CYP4A22, ADCY7, MYLK3, PRKCE, MYLK, ITPR1	127	119	6910	3.20056	0.986638	0.416912	23.6098
KIRP	hsa04514	Cell adhesion molecules (CAMs)	7	2.5	0.0448476	CD34, ITGA8, CLDN1, CTLA4, HLA-B, NEGR1, HLA-DOB	127	142	6910	2.68216	0.999901	0.536322	43.7623
KIRP	hsa04911	Insulin secretion	6	2.14286	0.0191396	ADCY7, KCNN3, CREB5, RAPGEF4, ATP1A1, CAMK2A	127	85	6910	3.84067	0.979439	0.425874	21.5272
KIRP	hsa04922	Glucagon signaling pathway	7	2.5	0.00918903	G6PC, FOXO1, CREB5, PRKAA2, CAMK2A, ITPR1, CPT1A	127	99	6910	3.84713	0.84363	0.371163	10.9348
KIRP	hsa04931	Insulin resistance	6	2.14286	0.046912	G6PC, FOXO1, CREB5, PRKAA2, PRKCE, CPT1A	127	108	6910	3.02275	0.999936	0.524266	45.2681
KIRP	hsa04971	Gastric acid secretion	8	2.85714	0.000340527	ADCY7, MYLK3, CFTR, ATP1A1, KCNJ10, CAMK2A, MYLK, ITPR1	127	73	6910	5.96268	0.0661669	0.0661669	0.426325
KIRP	hsa05200	Pathways in cancer	14	5	0.0263687	AR, ADCY7, PTGER4, CXCR4, FGF9, TGFBR2, MET, FASLG, FOXO1, BIRC5, FGF1, CXCL12, CTNNA3, RAD51	127	393	6910	1.93825	0.995352	0.415573	28.4814
LIHC	hsa00071	Fatty acid degradation	4	2.5974	0.0109887	ACSL1, CYP4A22, ACAT1, ACAA1	74	44	6910	8.48894	0.869072	0.334103	12.7682
LIHC	hsa00280	Valine, leucine and isoleucine degradation	5	3.24675	0.00145088	BCAT1, DBT, IVD, ACAT1, ACAA1	74	47	6910	9.93387	0.234447	0.234447	1.77897
LIHC	hsa03320	PPAR signaling pathway	4	2.5974	0.0334797	ACSL1, PLIN1, APOC3, ACAA1	74	67	6910	5.57483	0.9981	0.465581	34.3601
LIHC	hsa04015	Rap1 signaling pathway	8	5.19481	0.00645377	GRIN2B, MAP2K1, MAPK13, PDGFRA, GRIN2A, THBS1, SRC, PRKCB	74	210	6910	3.55727	0.696187	0.257576	7.69247
LIHC	hsa04020	Calcium signaling pathway	6	3.8961	0.0402556	CAMK4, P2RX3, PDGFRA, AVPR1A, GRIN2A, PRKCB	74	179	6910	3.13	0.999479	0.440972	39.8279
LIHC	hsa04370	VEGF signaling pathway	4	2.5974	0.0262995	MAP2K1, MAPK13, SRC, PRKCB	74	61	6910	6.12317	0.992582	0.503689	28.0705
LIHC	hsa04550	Signaling pathways regulating pluripotency of stem cells	6	3.8961	0.0158676	FZD9, ID2, MAP2K1, MAPK13, IL6ST, LIFR	74	140	6910	4.00193	0.947295	0.387684	17.9416
LIHC	hsa04720	Long-term potentiation	5	3.24675	0.00504293	GRIN2B, CAMK4, MAP2K1, GRIN2A, PRKCB	74	66	6910	7.07412	0.605544	0.266613	6.05887
LIHC	hsa04724	Glutamatergic synapse	5	3.24675	0.0320275	SLC38A2, GRIN2B, GRIN2A, SLC1A1, PRKCB	74	114	6910	4.09554	0.997495	0.527012	33.1303
LIHC	hsa04917	Prolactin signaling pathway	4	2.5974	0.0387773	MAP2K1, MAPK13, ESR1, SRC	74	71	6910	5.26075	0.999309	0.454701	38.672
LIHC	hsa04919	Thyroid hormone signaling pathway	5	3.24675	0.0320275	MAP2K1, ESR1, FOXO1, SRC, PRKCB	74	114	6910	4.09554	0.997495	0.527012	33.1303
LIHC	hsa05031	Amphetamine addiction	4	2.5974	0.0322189	GRIN2B, CAMK4, GRIN2A, PRKCB	74	66	6910	5.6593	0.997585	0.488057	33.2936
LIHC	hsa05034	Alcoholism	6	3.8961	0.0386461	GRIN2B, CAMK4, MAP2K1, H2AFZ, GRIN2A, PKIA	74	177	6910	3.16537	0.999291	0.482769	38.5684
LIHC	hsa05205	Proteoglycans in cancer	8	5.19481	0.00496029	FZD9, MAP2K1, MAPK13, ESR1, THBS1, SDC4, SRC, PRKCB	74	200	6910	3.73514	0.599469	0.367125	5.96236
LUAD	hsa04060	Cytokine-cytokine receptor interaction	6	5.35714	0.00995195	PDGFB, IL20RB, TGFBR2, LIFR, CNTFR, CXCL12	41	230	6910	4.39661	0.564016	0.24173	10.1569
LUAD	hsa04110	Cell cycle	4	3.57143	0.034418	CCNE1, E2F3, CDC14A, MCM4	41	124	6910	5.43666	0.945361	0.252261	31.2754
LUAD	hsa04151	PI3K-Akt signaling pathway	7	6.25	0.0135099	CCNE1, PDGFB, COL3A1, COL1A1, COL5A2, COL5A1, ANGPT4	41	345	6910	3.41958	0.676631	0.245908	13.5547
LUAD	hsa04510	Focal adhesion	6	5.35714	0.00631473	PDGFB, COL3A1, COL1A1, COL5A2, MYLK, COL5A1	41	206	6910	4.90883	0.408908	0.408908	6.55869
LUAD	hsa04512	ECM-receptor interaction	4	3.57143	0.0136171	COL3A1, COL1A1, COL5A2, COL5A1	41	87	6910	7.74881	0.679535	0.203555	13.6553
LUAD	hsa04611	Platelet activation	5	4.46429	0.00647363	COL3A1, COL1A1, COL5A2, MYLK, COL5A1	41	130	6910	6.48218	0.416702	0.236261	6.71858
LUAD	hsa04974	Protein digestion and absorption	4	3.57143	0.0140418	COL3A1, COL1A1, COL5A2, COL5A1	41	88	6910	7.66075	0.69079	0.177677	14.0526
LUAD	hsa05146	Amoebiasis	4	3.57143	0.0229872	COL3A1, COL1A1, COL5A2, COL5A1	41	106	6910	6.35987	0.854882	0.240992	22.0447
LUAD	hsa05200	Pathways in cancer	7	6.25	0.0241935	CCNE1, E2F3, PDGFB, MMP9, TGFBR2, CXCL12, DAPK1	41	393	6910	3.00192	0.869026	0.202171	23.0694
LUAD	hsa05219	Bladder cancer	3	2.67857	0.0232403	E2F3, MMP9, DAPK1	41	41	6910	12.3319	0.857969	0.216484	22.2608
LUSC	hsa04110	Cell cycle	13	3.77907	9.13297e-06	E2F1, E2F2, CDK1, CDC20, CHEK1, CDK4, CCNE2, CCNB1, CCND3, HDAC1, PCNA, CCNA2, TFDP1	145	124	6910	4.99611	0.00166083	0.000830758	0.0112697
LUSC	hsa04115	p53 signaling pathway	10	2.90698	8.82701e-06	CCNB1, CCNE2, CDK1, CCND3, RRM2, CHEK1, CDK4, IGFBP3, SESN1, SESN3	145	67	6910	7.11271	0.00160523	0.00160523	0.0108922
LUSC	hsa04512	ECM-receptor interaction	7	2.03488	0.00934424	ITGA6, COL3A1, ITGA11, SV2B, COL1A1, COL5A2, COL5A1	145	87	6910	3.83432	0.818889	0.43422	10.9393
LUSC	hsa04974	Protein digestion and absorption	6	1.74419	0.0361707	COL3A1, COL1A1, SLC1A1, COL5A2, COL5A1, COL10A1	145	88	6910	3.24922	0.998775	0.812929	36.5315
LUSC	hsa05166	HTLV-I infection	11	3.19767	0.040748	E2F1, E2F2, KAT2B, CCND3, PCNA, TNFRSF13C, CHEK1, CDC20, CDK4, MYBL2, TCF3	145	256	6910	2.04768	0.999485	0.780036	40.1525
STAD	hsa04020	Calcium signaling pathway	12	2.8777	0.00584881	SLC8A1, ATP2B3, ATP2B4, PDE1B, CYSLTR1, GRIN2D, GRIN2A, ITPKB, MYLK, ITPR1, PRKCB, F2R	177	179	6910	2.61718	0.699565	0.330244	7.11622
STAD	hsa04024	cAMP signaling pathway	11	2.63789	0.0294646	FOS, ATP2B3, ATP2B4, GRIN2D, GRIN2A, RAP1A, PDE3A, PDE4C, SOX9, HCAR1, F2R	177	198	6910	2.16886	0.997826	0.583496	31.3654
STAD	hsa04110	Cell cycle	16	3.83693	4.81305e-07	E2F1, DBF4, CHEK1, CDC20, CDK6, CHEK2, CDC25A, CCNE1, CCNB2, MAD2L1, PLK1, PCNA, BUB1, ORC6, ORC1, CCNA2	177	124	6910	5.03736	9.86627e-05	9.86627e-05	0.000605703
STAD	hsa04115	p53 signaling pathway	7	1.67866	0.00691848	CCNE1, CCNB2, BBC3, RRM2, CHEK1, CDK6, CHEK2	177	67	6910	4.07876	0.759063	0.29939	8.36612
STAD	hsa04710	Circadian rhythm	4	0.959233	0.0433304	CRY2, PER1, RORA, PRKAA2	177	31	6910	5.03736	0.999886	0.596707	42.7341
STAD	hsa04713	Circadian entrainment	7	1.67866	0.0337711	RPS6KA5, FOS, GRIN2D, GRIN2A, PER1, ITPR1, PRKCB	177	95	6910	2.8766	0.999126	0.542747	35.101
STAD	hsa05161	Hepatitis B	9	2.15827	0.0314048	E2F1, CCNE1, FOS, MMP9, PCNA, BIRC5, CDK6, CCNA2, PRKCB	177	145	6910	2.42314	0.998557	0.558535	33.0723
STAD	hsa05200	Pathways in cancer	18	4.31655	0.0220365	E2F1, MMP9, MET, BIRC5, CDK6, ZBTB16, KIT, CTNNA3, TCF7L1, MMP1, RAD51, PRKCB, CCNE1, FOS, CKS2, RUNX1, FGF2, F2R	177	393	6910	1.78807	0.989621	0.598923	24.4536
STAD	hsa05202	Transcriptional misregulation in cancer	10	2.39808	0.027355	MMP9, SIX1, MET, PBX1, NR4A3, ZBTB16, RUNX1, HMGA2, MEIS1, PLAU	177	168	6910	2.32378	0.996607	0.61235	29.4641
STAD	hsa05206	MicroRNAs in cancer	17	4.07674	0.00238088	RECK, E2F1, MMP9, MET, EZH2, CDK6, ZEB1, HMGA2, TIMP3, TPM1, CDC25A, PRKCB, RPS6KA5, CCNE1, ZFPM2, STMN1, PLAU	177	285	6910	2.32867	0.386553	0.216772	2.95527
THCA	hsa05200	Pathways in cancer	5	11.3636	0.0135741	LAMA2, BCL2, PTCH2, KIT, RUNX1	18	393	6910	4.88408	0.55958	0.55958	12.8001
