# Supplementary material for: Integrated Analysis of MicroRNA (miRNA) and mRNA Profiles Reveals Reduced Correlation between MicroRNA and Target Gene in Cancer
Source: Biomed Res Int. 2018 Dec 6;2018:1972606. doi: 10.1155/2018/1972606 (PMC6304515; doi:10.1155/2018/1972606)
Supplement: Supplementary Materials — Figure S1. Expression density distribution of mRNAs and miRNAs before and after filtering. Figure S2. Distribution of the PCC values of critical miRNA-target gene pairs in healthy controls and 4 clinically staged tumors. Figure S3: Simple correlations coefficients (Cor) and partial correlation coefficients (Pcor) of critical pairs in normal and tumor samples of LIHC. Figure S4: Simple correlations coefficients (Cor) and partial correlation coefficients (Pcor) of critical pairs in normal and tumor samples of LUAD. Figure S5: Simple correlations coefficients (Cor) and partial correlation coefficients (Pcor) of critical pairs in tumor samples of LIHC. Figure S6: Simple correlations coefficients (Pearson correlation coefficient) and partial correlation coefficients (given CNAs effects) of critical pairs in cancer samples of LUAD. Table S1: Sample sizes for each cancer type. Table S2. Sample clinical and grouping information for each cancer type. Table S3. List of DEMs for each cancer type. Table S4. List of DEGs for each cancer type. Table S5. Frequency of DEMs and DEGs in 11 cancer types. Table S6. List of critical miRNA-target gene pairs for each cancer type. Table S7: Interactional references and gene functional references for some critical miRNA-target pairs. Table S8. Frequency of critical miRNA-target pairs in 11 cancer types. Table S9. List of the significantly GO annotation terms (p < 0.05) for the critical target genes in each cancer type. Table S10. List of the significantly KEGG pathway terms (p < 0.05) for the critical target genes in each cancer type. Table S11. Partial and simple correlation coefficients for each critical pair in normal and tumor samples of LUAD and LIHC when controlling methylation or CNAs effect. [file 1972606.f1.zip › 1972606.f1/Table S11_BMRI_2598530.xlsx]

## Sheet: LIHC
Samples Number	Sample Number =49				Sample Number =49
Pairs	Normal_Cor	Tumor_Cor	Normal_Pcor (given methylation effects)	Tumor_Pcor (given methylation effects)	Tumor_Pcor(given CNAs effects)_49	Tumor_Cor
PRKD2/miR-378a	-0.704404	-0.382923	-0.706249	-0.373907	-0.308577	-0.355636
ACSL1/miR-34a	-0.67464	-0.121012	-0.596173	-0.1539	-0.126515	-0.0982275
CFDP1/miR-30e	-0.636237	-0.246909	-0.638796	-0.207422	-0.257145	-0.290224
TPD52L2/miR-122	-0.629242	-0.47848	-0.629491	-0.465225	-0.592267	-0.595257
FBLIM1/miR-378a	-0.624744	-0.417135	-0.5527	-0.404487	-0.257504	-0.301905
SLC35C2/miR-5589	-0.623389	-0.0975542	-0.601865	-0.086287	-0.171861	-0.146586
ARPC2/miR-378a	-0.621958	-0.253118	-0.50879	-0.289782	-0.327099	-0.318234
PIP4K2C/miR-574	-0.616804	-0.294956	-0.625219	-0.290861	-0.278895	-0.286754
GNE/miR-21	-0.611393	-0.535703	-0.535911	-0.458593	-0.30849	-0.362214
MARCKS/miR-122	-0.609863	-0.375834	-0.592164	-0.405308	-0.372353	-0.384062
PKM/miR-122	-0.604357	-0.763641	-0.534479	-0.772344	-0.842294	-0.838509
CUL2/miR-574	-0.591754	-0.193762	-0.595959	-0.19181	-0.0586278	-0.0763849
NAP1L1/miR-30e	-0.589944	-0.209337	-0.579192	-0.155908	-0.366607	-0.335087
PEA15/miR-122	-0.583826	-0.336865	-0.529285	-0.347192	-0.50376	-0.444701
CKS2/miR-574	-0.582941	-0.137039	-0.583535	-0.177521	-0.12429	-0.134575
PYGB/miR-378a	-0.579406	-0.0608963	-0.561049	-0.0181816	-0.0952288	-0.088241
VIM/miR-378a	-0.577799	-0.248248	-0.472658	-0.243315	-0.188814	-0.192386
BUB3/miR-27b	-0.570758	-0.0357377	-0.566884	-0.0225526	0.00594797	-0.00682874
TAF9/miR-505	-0.566951	-0.141333	-0.560969	-0.141488	-0.0312213	-0.0237526
YWHAB/miR-122	-0.565307	-0.613106	-0.566691	-0.667074	-0.513827	-0.501175
YWHAB/miR-378a	-0.555437	-0.250506	-0.557852	-0.319209	-0.298187	-0.296267
RPIA/miR-30e	-0.548249	0.0828501	-0.534934	0.100066	0.0593389	0.0540363
ACSL1/miR-93	-0.545229	-0.225604	-0.588204	-0.309121	-0.0570483	-0.116451
ARPP19/miR-574	-0.544798	-0.327419	-0.553654	-0.335052	-0.317563	-0.333546
CNDP1/miR-181b.2	-0.542434	-0.199949	-0.351433	-0.220063	-0.171379	-0.182382
FAM136A/miR-27b	-0.54187	-0.132994	-0.537074	-0.168201	-0.0447521	-0.0947319
EHMT2/miR-27b	-0.537704	-0.127531	-0.506096	-0.127847	-0.093492	-0.088557
YKT6/miR-122	-0.536192	-0.546471	-0.536577	-0.550903	-0.634132	-0.618468
TRAFD1/miR-378a	-0.532345	-0.159653	-0.520085	-0.163422	-0.217438	-0.197597
PPP1R8/miR-505	-0.532078	0.165279	-0.525672	0.169038	-0.0859765	0.16657
DGAT1/miR-10a	-0.531637	-0.0360564	-0.529694	0.0746844	0.0176387	-0.00592228
PHLDA3/miR-378a	-0.530379	-0.450305	-0.534442	-0.416353	-0.304095	-0.305485
PFDN1/miR-122	-0.526667	-0.611743	-0.515144	-0.637939	-0.7273	-0.678802
HM13/miR-378a	-0.518518	-0.434462	-0.479154	-0.44452	-0.445274	-0.472793
INPPL1/miR-27b	-0.517622	-0.132543	-0.512857	-0.149079	-0.0663377	-0.070051
FAM84B/miR-27b	-0.516092	-0.395371	-0.37054	-0.377683	-0.138878	-0.27353
BPGM/miR-122	-0.513506	-0.40966	-0.451573	-0.406324	-0.46747	-0.409761
AGGF1/miR-27b	-0.511032	-0.019619	-0.429285	-0.0295021	-0.0675537	-0.0589116
MCAM/miR-122	-0.510596	-0.390362	-0.50383	-0.29445	-0.539122	-0.5245
UBXN1/miR-30e	-0.509773	-0.396932	-0.512614	-0.402722	-0.439099	-0.438807
FLNA/miR-378a	-0.508937	-0.357034	-0.449831	-0.355168	-0.310462	-0.311524
SCAMP3/miR-5589	-0.506219	-0.190651	-0.523365	-0.247776	-0.403983	-0.195981
43349/miR-574	-0.504652	-0.0451191	-0.476419	-0.0701942	-0.0625416	-0.0347965
ANXA11/miR-122	-0.496827	-0.442451	-0.46551	-0.45906	-0.610927	-0.571021
TMEM56/miR-21	-0.496571	-0.468632	-0.406301	-0.46021	-0.36674	-0.342342
AVPR1A/miR-221	-0.49402	-0.469972	-0.0974514	-0.4859	-0.46292	-0.475185
WIZ/miR-30c.2	-0.493624	0.137382	-0.464845	0.205094	0.205146	0.162478
ACADSB/miR-106b	-0.493513	0.0817353	-0.494752	0.00370121	0.0816807	0.0922996
NCK2/miR-505	-0.492519	-0.177048	-0.475467	-0.0375547	-0.183165	-0.231873
CDKN2AIPNL/miR-5589	-0.489962	-0.281659	-0.464731	-0.354911	-0.282356	-0.25528
MYRF/miR-378a	-0.489921	-0.395634	-0.363136	-0.220306	-0.465824	-0.4831
PHLDA3/miR-122	-0.487637	-0.330282	-0.48769	-0.313364	-0.564964	-0.555765
NONO/miR-505	-0.486047	-0.00713774	-0.507373	-0.0338209	-0.0168291	-0.0252744
UTP6/miR-505	-0.484585	-0.00615594	-0.521492	0.182145	0.0647165	0.0225127
PRMT1/miR-378a	-0.480844	-0.347799	-0.491031	-0.353993	-0.249141	-0.335755
ABCF2/miR-122	-0.480451	-0.244561	-0.485811	-0.230848	-0.185124	-0.166857
DCAKD/miR-574	-0.47742	-0.202106	-0.476309	-0.21132	-0.229037	-0.242487
BAX/miR-122	-0.475218	-0.249859	-0.557637	-0.332594	-0.200992	-0.273414
ZWINT/miR-26b	-0.474476	-0.0100933	-0.477118	-0.00697836	0.0194254	0.0131832
SLC52A2/miR-122	-0.474457	-0.337728	-0.504208	-0.388739	-0.681314	-0.476182
GTF3C6/miR-122	-0.473226	-0.373382	-0.459501	-0.365099	-0.538873	-0.476998
PSMD3/miR-378a	-0.46833	0.0550294	-0.540394	0.0519829	-0.108634	-0.0570698
STMN1/miR-30e	-0.464828	0.146271	-0.481803	0.116081	0.0715561	0.0778913
C14orf119/miR-5589	-0.464321	-0.277339	-0.460604	-0.269554	-0.329121	-0.334633
KCMF1/miR-122	-0.46363	-0.337908	-0.479544	-0.179867	-0.164358	-0.200421
LETM1/miR-30c.2	-0.462788	0.0142491	-0.469395	-0.0474324	0.0916611	-0.00348396
SCAMP2/miR-378a	-0.462665	-0.21724	-0.302148	-0.178919	-0.227159	-0.244734
TUBA1B/miR-505	-0.461033	-0.041071	-0.416865	-0.0882776	-0.0022999	-0.00541466
RPS26/miR-99a	-0.459851	0.0199491	-0.445987	0.0413639	-0.0261102	-0.0301683
PSMD11/miR-30c.2	-0.459555	0.26781	-0.446438	0.27237	0.226078	0.21262
MOGS/miR-378a	-0.458723	-0.0741089	-0.457315	-0.103885	-0.23833	-0.2394
SET/miR-122	-0.45549	-0.423135	-0.428568	-0.429773	-0.330131	-0.326871
ANKRD10/miR-122	-0.45488	-0.102861	-0.474804	-0.0928804	-0.486832	-0.325422
KARS/miR-122	-0.454705	-0.214144	-0.467431	-0.211025	-0.407173	-0.304118
LPCAT1/miR-30e	-0.454618	-0.188927	-0.425993	-0.17545	-0.228215	-0.319189
MAZ/miR-30c.2	-0.454268	0.256571	-0.432049	0.254072	0.0770897	0.135563
TMEM167A/miR-27b	-0.453227	-0.336941	-0.453558	-0.364226	-0.313717	-0.283039
NOL10/miR-122	-0.451518	-0.387713	-0.451962	-0.431074	-0.190475	-0.223427
YKT6/miR-5589	-0.450225	-0.40074	-0.442001	-0.408181	-0.431879	-0.477189
ARPP19/miR-125b.2	-0.44432	-0.193765	-0.443932	-0.19271	-0.25724	-0.206995
AGTRAP/miR-30e	-0.442225	-0.132622	-0.415007	-0.12992	-0.253903	-0.217037
TYMS/miR-26b	-0.441922	-0.0645777	-0.397751	-0.0437597	-0.0102896	-0.0183179
BAMBI/miR-122	-0.441703	-0.1455	-0.443633	-0.183947	-0.0945592	-0.103398
GRB2/miR-378a	-0.440621	-0.0381843	-0.381433	-0.110139	-0.222886	-0.121467
NASP/miR-122	-0.438721	-0.052237	-0.431083	-0.119721	-0.293052	-0.123458
SUB1/miR-5589	-0.437954	-0.135897	-0.450327	-0.132443	-0.248116	-0.20671
PLEC/miR-574	-0.435232	-0.360484	-0.44335	-0.375508	-0.405009	-0.354737
G6PC3/miR-122	-0.434533	-0.741551	-0.382253	-0.751105	-0.840011	-0.820288
RPL14/miR-5589	-0.434304	-0.469708	-0.468578	-0.440865	-0.521651	-0.5022
SCP2/miR-30d	-0.430908	-0.279592	-0.405556	-0.279038	-0.0342958	-0.111183
MAPRE1/miR-122	-0.429175	-0.724135	-0.426195	-0.768185	-0.715124	-0.708476
GTF2F1/miR-122	-0.42909	-0.486896	-0.438988	-0.490466	-0.511971	-0.592185
TIPRL/miR-574	-0.429074	-0.243612	-0.46019	-0.245238	-0.0426507	-0.111996
UBE2L3/miR-122	-0.428794	-0.294692	-0.425202	-0.37088	-0.545207	-0.445818
ALDOA/miR-378a	-0.428779	-0.301887	-0.400113	-0.316742	-0.295072	-0.261271
POLR2G/miR-26b	-0.42875	-0.363951	-0.409981	-0.340346	-0.363515	-0.369055
HMGN4/miR-505	-0.428372	-0.0653001	-0.42918	-0.0566161	-0.0738377	-0.0724716
TGFB1/miR-122	-0.427956	-0.523167	-0.317243	-0.473655	-0.44612	-0.504566
CCND3/miR-27b	-0.427066	-0.17873	-0.210514	-0.177764	-0.106006	-0.0953133
SUB1/miR-574	-0.426956	-0.0101272	-0.419066	0.0258123	-0.0462317	-0.0679667
NABP2/miR-505	-0.426289	-0.151147	-0.44899	-0.142603	-0.175922	-0.176376
EMC7/miR-26b	-0.425339	-0.222468	-0.370153	-0.21739	-0.317207	-0.211797
TIMM50/miR-378a	-0.425196	-0.198816	-0.425016	-0.231592	0.0362343	-0.0947991
LRPAP1/miR-378a	-0.424565	-0.185255	-0.446839	-0.214673	-0.113253	-0.239919
PPIC/miR-27b	-0.423953	0.0131072	-0.381626	-0.0419973	0.12504	0.139775
SZRD1/miR-27b	-0.423562	-0.180431	-0.405229	-0.168252	-0.147876	-0.139714
NSA2/miR-33b	-0.422721	-0.269345	-0.420581	-0.264851	-0.141219	-0.140366
RHOA/miR-122	-0.421776	-0.481452	-0.406409	-0.53557	-0.539209	-0.449771
PTPN1/miR-122	-0.421301	-0.381101	-0.39672	-0.462348	-0.32703	-0.339975
KIF1C/miR-30c.2	-0.420253	-0.0109942	-0.421946	-0.00665687	-0.0388292	-0.00249373
MRPS14/miR-27b	-0.420245	-0.141847	-0.421039	-0.137719	-0.208497	-0.124058
LYVE1/miR-34a	-0.417439	-0.160322	-0.422899	-0.16279	-0.0947693	-0.103
BLOC1S3/miR-378a	-0.417349	-0.311515	-0.424297	-0.275484	-0.131063	-0.253835
RPL10/miR-505	-0.417226	-0.0669375	-0.415825	-0.0943948	-0.156243	-0.132795
DNAJC8/miR-152	-0.41699	-0.0852408	-0.404157	-0.107172	-0.144682	-0.018837
SMYD2/miR-27b	-0.416767	-0.274133	-0.401986	-0.2727	-0.201437	-0.275031
FLYWCH2/miR-122	-0.414907	-0.100365	-0.40573	-0.123606	-0.222678	-0.170626
RCC2/miR-378a	-0.413799	-0.325196	-0.410247	-0.299745	-0.372555	-0.352693
TTC31/miR-378a	-0.413285	0.139357	-0.414647	0.109021	0.108299	0.0866654
STK25/miR-378a	-0.413002	-0.164557	-0.369245	-0.176761	-0.130723	-0.140462
ZCRB1/miR-30e	-0.412651	-0.137234	-0.420757	-0.161855	-0.272709	-0.211121
PRKAB1/miR-122	-0.411537	-0.224838	-0.43632	-0.404608	-0.141252	-0.195152
PANK1/miR-452	-0.410909	-0.0413579	-0.385828	-0.119112	-0.0612347	-0.0893826
SLC39A14/miR-25	-0.410532	0.255743	-0.382438	0.329507	0.328198	0.310414
ALDOA/miR-122	-0.409131	-0.558158	-0.386705	-0.651471	-0.74871	-0.693445
KXD1/miR-505	-0.409051	-0.125019	-0.409031	-0.126719	-0.031884	-0.124806
RAD21/miR-574	-0.408804	-0.194944	-0.415863	-0.195351	-0.0608734	-0.0403194
SFXN4/miR-27b	-0.408018	-0.158776	-0.456656	-0.109428	-0.0958275	-0.140275
HNRNPC/miR-505	-0.407983	-0.239237	-0.370215	-0.230426	-0.24935	-0.230011
ADD1/miR-27b	-0.40609	-0.160144	-0.406559	-0.16049	-0.0806345	-0.134408
TUBB/miR-505	-0.404951	-0.0534282	-0.393288	-0.0901595	-0.0418627	-0.0675118
DSN1/miR-30c.2	-0.401449	0.454231	-0.398817	0.362616	0.356099	0.373081
APOO/miR-26b	-0.399967	-0.375376	-0.369821	-0.382883	-0.347996	-0.352757
CASC3/miR-378a	-0.397295	-0.195222	-0.385278	-0.2058	-0.256028	-0.194431
RPL9/miR-505	-0.397202	-0.469589	-0.399423	-0.469435	-0.474551	-0.501219
RBBP4/miR-30c.2	-0.395469	0.328323	-0.357615	0.329569	0.365292	0.347161
BPNT1/miR-30c.2	-0.39537	0.181872	-0.391935	0.199735	0.0304958	0.0127577
APEX1/miR-27b	-0.394919	-0.0399419	-0.374426	-0.0348523	-0.115895	-0.0725051
ACSL4/miR-378a	-0.394776	-0.161443	-0.486682	-0.177681	-0.235195	-0.236496
MTPN/miR-122	-0.392066	-0.577846	-0.383202	-0.551252	-0.361851	-0.348048
PSME1/miR-26b	-0.391623	-0.0940988	-0.29853	-0.0891764	-0.087714	-0.0659111
PTGFRN/miR-139	-0.390202	-0.435435	-0.284452	-0.427198	-0.379903	-0.390254
NARS/miR-122	-0.389923	-0.320003	-0.390022	-0.318554	-0.230643	-0.208036
SHMT1/miR-224	-0.389506	0.0212839	-0.271157	-0.0134545	0.0657629	0.0278249
RPS8/miR-30e	-0.387823	-0.314813	-0.366337	-0.1748	-0.475286	-0.381295
FXYD5/miR-5589	-0.38744	-0.252855	-0.305491	-0.254484	-0.262223	-0.330275
PLXND1/miR-27b	-0.386804	-0.0984199	-0.343906	-0.146058	0.0211623	0.00708124
LYZ/miR-26b	-0.386691	-0.173744	-0.398215	-0.247465	-0.117847	-0.147207
DYNC1H1/miR-122	-0.384783	-0.432272	-0.385323	-0.43495	-0.462152	-0.43964
MFSD2A/miR-20a	-0.384474	-0.497338	-0.383935	-0.527534	-0.413731	-0.431777
MCM7/miR-30c.2	-0.38419	0.392458	-0.394407	0.401062	0.316043	0.314336
EIF3D/miR-378a	-0.382954	-0.233417	-0.393464	-0.229804	-0.363753	-0.326427
REEP4/miR-26b	-0.382482	-0.0182255	-0.385038	-0.033969	-0.0363729	0.0080482
SRD5A1/miR-660	-0.381416	-0.286279	-0.437351	-0.300289	-0.335321	-0.306286
CFDP1/miR-27b	-0.380449	0.0889876	-0.274854	0.0550441	0.136021	0.107723
ZNF277/miR-30c.2	-0.379347	0.0529957	-0.327819	0.056549	0.0462066	-0.0264314
TMCO1/miR-122	-0.379217	-0.0680304	-0.369671	-0.0910694	0.132509	0.20346
NUP133/miR-27b	-0.379204	-0.187955	-0.365173	-0.202186	-0.0867389	-0.184506
UBE2I/miR-30e	-0.378373	0.0577792	-0.385842	0.0708296	-0.18405	-0.0707114
TTYH3/miR-122	-0.378057	-0.384311	-0.380329	-0.480119	-0.320867	-0.315212
MAPKAP1/miR-26b	-0.377471	-0.0600795	-0.42393	-0.0773128	-0.0775227	-0.0808879
HMGN1/miR-27b	-0.377363	0.141308	-0.390141	0.171909	0.225772	0.202216
CBY1/miR-26b	-0.376962	0.0694098	-0.380242	0.0807027	-0.0451008	-0.00256346
YWHAZ/miR-574	-0.376249	-0.228633	-0.292496	-0.161139	-0.261838	-0.222084
SUB1/miR-505	-0.376022	-0.042627	-0.376831	-0.0156109	-0.087607	-0.0831327
SLC35F6/miR-378a	-0.374665	0.0418478	-0.38441	-0.0656715	0.0763084	0.0273717
YWHAZ/miR-378a	-0.374102	-0.435104	-0.324946	-0.428598	-0.441785	-0.484685
SET/miR-378a	-0.373514	-0.173589	-0.333361	-0.181437	-0.23394	-0.193043
RPS7/miR-30e	-0.373353	-0.234207	-0.37321	-0.0434509	-0.383548	-0.261373
CYP2B6/miR-660	-0.372962	-0.240993	-0.386819	-0.315593	-0.328629	-0.298867
SRSF1/miR-505	-0.372589	-0.0947201	-0.335024	-0.0815644	-0.0600166	-0.0573103
MXD4/miR-378a	-0.37247	-0.28069	-0.393806	-0.27786	-0.0367963	-0.0986356
AKR1D1/miR-660	-0.371406	-0.277307	-0.358692	-0.387292	-0.288341	-0.306026
VBP1/miR-505	-0.37121	0.239358	-0.344775	0.206606	0.181003	0.196464
RNPS1/miR-378a	-0.370175	-0.122419	-0.356837	-0.0989082	-0.164697	-0.119453
RARS/miR-99a	-0.370064	-0.286719	-0.35378	-0.27911	-0.429908	-0.370354
MYH9/miR-30c.2	-0.368945	0.112259	-0.292014	0.138172	0.193472	0.156458
ANXA11/miR-505	-0.367778	-0.163847	-0.379948	-0.209551	-0.217457	-0.216514
GIGYF1/miR-30e	-0.366133	0.133987	-0.339686	0.173719	0.0144467	0.0795368
ACTN4/miR-378a	-0.365679	-0.284007	-0.318766	-0.286764	-0.18317	-0.218582
ST14/miR-27b	-0.36493	-0.12998	-0.151611	-0.143845	-0.132455	-0.142673
RPS3/miR-30e	-0.364545	-0.450079	-0.372038	-0.452166	-0.480903	-0.483511
PHB/miR-27b	-0.364059	-0.149394	-0.373393	-0.244804	-0.235966	-0.16218
CDK4/miR-122	-0.363993	-0.411325	-0.371072	-0.498041	-0.274898	-0.304799
TSEN54/miR-27b	-0.363931	0.0439557	-0.27403	0.0331193	-0.0290208	0.0560738
DDX39A/miR-378a	-0.3638	-0.404684	-0.234144	-0.487955	-0.221594	-0.30704
PEX2/miR-5589	-0.363342	-0.263215	-0.360806	-0.274639	0.00647455	-0.0946435
ADAR/miR-27b	-0.362888	-0.22861	-0.327467	-0.216436	-0.253067	-0.165251
TUSC2/miR-378a	-0.361324	0.0128475	-0.34727	-0.00691999	-0.0684113	0.0525209
MED29/miR-122	-0.36102	-0.376514	-0.356724	-0.393833	-0.349546	-0.397771
THBS2/miR-27b	-0.360718	-0.0533984	-0.36881	0.0410409	0.0283259	0.0239536
NAMPT/miR-34a	-0.358606	-0.411236	-0.197643	-0.375695	-0.42916	-0.427826
TMEM101/miR-3607	-0.357501	0.109337	-0.365034	0.111448	0.128665	0.0931744
BAK1/miR-30c.2	-0.357169	0.288963	-0.288228	0.176746	0.391787	0.385274
TOX4/miR-30c.2	-0.355953	0.114563	-0.301581	0.140752	0.146576	0.137913
SLC25A33/miR-122	-0.355589	0.304839	-0.373469	-0.0955248	0.381463	0.449346
TM9SF4/miR-125b.2	-0.355046	-0.231445	-0.369879	-0.233705	-0.25741	-0.29096
MRPL22/miR-26b	-0.354687	-0.0916686	-0.360122	-0.0565864	-0.0589283	-0.089973
REPIN1/miR-26b	-0.353186	0.185294	-0.322576	0.194735	0.091193	0.177482
AP1S1-hsa.let.7c	-0.352985	-0.166513	-0.322931	-0.146605	-0.213331	-0.243775
TK1/miR-26b	-0.352708	0.0105657	-0.236339	0.000389449	-0.0838286	-0.0331448
ABCF1/miR-122	-0.352055	-0.280591	-0.357471	-0.353732	-0.204575	-0.237702
TUBG1/miR-99a	-0.351559	-0.343646	-0.392331	-0.35297	-0.0420227	-0.238682
FAM120AOS/miR-122	-0.349848	-0.431821	-0.348635	-0.419378	-0.389867	-0.38169
DNTTIP2/miR-505	-0.349535	0.0192029	-0.353213	0.0140022	-0.154444	0.0477999
PSMD10/miR-122	-0.348893	-0.298264	-0.346061	-0.403537	-0.177323	-0.13732
BAG6/miR-378a	-0.348469	-0.163107	-0.361463	-0.170283	-0.161972	-0.228183
TIMM50/miR-30c.2	-0.348357	0.156092	-0.348378	0.133675	0.289591	0.294907
AKAP8L/miR-378a	-0.347379	-0.246023	-0.346252	-0.24623	-0.10497	-0.290626
EMC7/miR-505	-0.347262	-0.156769	-0.341386	-0.148331	-0.133443	-0.139658
BCL2L1/miR-122	-0.34718	-0.279036	-0.328435	-0.374482	-0.401324	-0.396526
COX6B1-hsa.let.7c	-0.346203	-0.116545	-0.363228	-0.124696	0.0289292	-0.0186629
PPP1R9B/miR-122	-0.345917	-0.583738	-0.268886	-0.624705	-0.623414	-0.621667
TYMS/miR-99a	-0.345473	-0.255169	-0.300547	-0.254766	-0.283884	-0.266404
KXD1/miR-378a	-0.345354	-0.28547	-0.350773	-0.309325	-0.160162	-0.22453
EPB41L4B/miR-30d	-0.345183	-0.150322	-0.324972	-0.0948719	0.0325071	-0.00203868
SNAP47/miR-27b	-0.345006	-0.167091	-0.313238	-0.153729	0.0136691	-0.15086
PHAX/miR-30c.2	-0.343938	0.130411	-0.331092	0.0143265	0.0761184	0.0119862
CPNE1/miR-378a	-0.343128	-0.183517	-0.335995	-0.264082	-0.00239575	-0.0975498
RFC2/miR-122	-0.341955	-0.551757	-0.308215	-0.614805	-0.382726	-0.373851
SUMF2/miR-30c.2	-0.341914	-0.00417937	-0.205659	-0.00602747	-0.054124	-0.106687
ISG20L2/miR-378a	-0.341809	-0.379758	-0.271962	-0.439654	-0.335811	-0.382311
SERPINH1/miR-378a	-0.34028	-0.312995	-0.328892	-0.353021	-0.142797	-0.160959
LAMC1/miR-122	-0.339879	-0.402242	-0.2515	-0.417869	-0.565261	-0.550432
CCT4/miR-27b	-0.33932	-0.274999	-0.338471	-0.264621	-0.195735	-0.260551
CYP1A2/miR-221	-0.337279	0.0174026	-0.209058	0.11127	0.0104544	0.0165039
DDX17/miR-378c	-0.336288	-0.414249	-0.320844	-0.422838	-0.464369	-0.448407
RNPEPL1/miR-26b	-0.33521	-0.167109	-0.26475	-0.0217813	-0.249451	-0.224023
RAPGEF1/miR-27b	-0.334735	0.000624295	-0.143985	0.123791	-0.0105529	-0.00396748
XPO6/miR-122	-0.334641	-0.183797	-0.361479	-0.238965	-0.352721	-0.254064
HUWE1/miR-30c.2	-0.333291	0.0916368	-0.323967	0.0990289	0.110231	0.0965473
GIGYF1/miR-33b	-0.333123	-0.0657055	-0.285007	-0.12462	-0.237525	-0.147778
ZNF581-hsa.let.7c	-0.332901	-0.392841	-0.328687	-0.364371	-0.454663	-0.441208
MYRF/miR-378c	-0.331862	-0.348368	-0.221594	-0.142351	-0.41183	-0.427497
FN3K/miR-139	-0.331462	0.0475664	-0.323889	0.067086	0.254151	0.159496
LARS/miR-378a	-0.331461	-0.352485	-0.343738	-0.374799	-0.323613	-0.316468
PGAM5/miR-30c.2	-0.331322	0.15922	-0.342736	0.114397	-0.0184987	0.0646175
GIGYF1/miR-5589	-0.330833	-0.260238	-0.311721	-0.215561	-0.285563	-0.340531
AKIP1/miR-30c.2	-0.330566	0.119074	-0.319535	0.113975	0.226378	0.215065
ATL3/miR-30c.2	-0.329918	0.00280974	-0.38591	0.0618942	-0.0458293	-0.0531308
LSG1/miR-30c.2	-0.329672	0.336817	-0.324305	0.314687	0.191249	0.239268
CDC37L1/miR-30d	-0.328154	-0.299884	-0.364509	-0.303265	-0.155315	-0.297786
RRP36/miR-122	-0.327938	-0.235175	-0.323813	-0.312626	-0.222081	-0.250378
DCTPP1/miR-378a	-0.327129	-0.248316	-0.317553	-0.29484	-0.386039	-0.293255
ATN1/miR-505	-0.326976	-0.0508709	-0.349946	-0.0278832	-0.153404	-0.136468
GDI1/miR-505	-0.32609	0.119459	-0.296822	0.121393	0.00427929	0.0254963
POLDIP3/miR-1258	-0.325925	-0.265584	-0.312181	-0.263456	-0.228901	-0.23008
TRAM1/miR-125b.2	-0.324851	-0.516793	-0.254672	-0.503083	-0.491206	-0.520776
NCKIPSD/miR-30c.2	-0.324402	-0.0726183	-0.391839	-0.0912125	-0.0135077	-0.0241733
LGALS8/miR-378a	-0.323994	-0.0183608	-0.224491	-0.161145	0.0266458	-0.0447417
PAK4/miR-5589	-0.322764	-0.364244	-0.286069	-0.360626	-0.313231	-0.381092
43165/miR-30c.2	-0.321068	0.0367341	-0.32495	0.0360643	-0.00829526	0.0291801
SH3GL1/miR-30e	-0.319466	0.17867	-0.314953	0.170558	0.0663313	0.0676843
PRKD2/miR-378c	-0.318227	-0.303378	-0.321256	-0.289724	-0.251218	-0.287027
UBA52-hsa.let.7c	-0.317717	-0.0800397	-0.311652	-0.0359971	-0.133649	-0.114281
MCUR1/miR-26b	-0.316886	0.0074934	-0.319931	-0.0408231	-0.00127067	-0.0212231
CD47/miR-505	-0.316432	0.115682	-0.281664	0.192742	0.114521	0.101157
MRPL17/miR-122	-0.316149	-0.277354	-0.311763	-0.290568	-0.486871	-0.484975
MTOR/miR-99a	-0.315939	-0.117437	-0.172312	-0.27437	-0.2247	-0.139115
PGK1/miR-27b	-0.31541	-0.383263	-0.256149	-0.370086	-0.367246	-0.362096
CUL2/miR-99a	-0.315186	-0.142395	-0.315418	-0.13607	-0.184406	-0.200657
FKBP1A/miR-505	-0.315058	0.00381256	-0.24209	-0.113468	-0.0794549	-0.0820939
BID/miR-26b	-0.314883	-0.212946	-0.27418	-0.11225	-0.168768	-0.176472
KHSRP/miR-30c.2	-0.313775	0.174848	-0.278229	0.173195	0.229457	0.20911
EMC3/miR-26b	-0.313765	-0.254301	-0.276197	-0.266133	-0.31854	-0.246111
RAB10/miR-122	-0.313579	-0.526846	-0.341556	-0.566809	-0.281177	-0.300945
FGFR3/miR-26b	-0.313458	0.245877	-0.306908	0.201913	0.244482	0.200629
LDHD/miR-106b	-0.312048	-0.383995	-0.267567	-0.365402	-0.152008	-0.279488
PPIC/miR-122	-0.311764	-0.634537	-0.324218	-0.645357	-0.584216	-0.557785
IPO13/miR-26b	-0.311364	-0.00662752	-0.31438	-0.101354	-0.25584	-0.0654099
MRPS33/miR-100	-0.310717	0.0266056	-0.357123	0.0273609	-0.103108	-0.0464509
HNRNPA3/miR-505	-0.310494	-0.0119551	-0.236391	-0.059792	0.0534358	-0.0113558
KIF1C/miR-26b	-0.309201	-0.0833674	-0.310824	-0.107927	-0.164994	-0.0841472
PTBP1/miR-378a	-0.308727	-0.29384	-0.281871	-0.237628	-0.286022	-0.296519
TFIP11/miR-30c.2	-0.30752	0.0560744	-0.311924	0.0839804	-0.0943092	-0.138121
SLC25A5/miR-27b	-0.305295	-0.263179	-0.249049	-0.256607	-0.158159	-0.17317
RPS7/miR-378c	-0.305203	-0.164064	-0.305352	-0.293333	-0.120894	-0.164071
OCRL/miR-378a	-0.305052	-0.370407	-0.330532	-0.362568	-0.419974	-0.417819
SLC25A23/miR-26b	-0.304837	0.22217	-0.303617	0.225109	0.169704	0.131059
TADA3/miR-26b	-0.304506	0.0817548	-0.279255	0.0877729	-0.048781	-0.00505682
TUBB2A/miR-505	-0.304471	0.162199	-0.324548	0.125408	0.246597	0.234454
PPP2R1A/miR-505	-0.302797	-0.280461	-0.296755	-0.276483	-0.252756	-0.314533
DVL1/miR-378a	-0.302346	0.045221	-0.286859	-0.0141123	-0.0752057	0.0363228
RPLP0/miR-30e	-0.300498	-0.454205	-0.181824	-0.449979	-0.548621	-0.514945
MRPL12-hsa.let.7c	-0.298973	-0.117129	-0.315962	-0.126445	0.0143895	-0.0457133
FBXL6/miR-26b	-0.298795	-0.207908	-0.243469	-0.201019	0.020898	-0.236778
NDRG3/miR-122	-0.298537	-0.681577	-0.280395	-0.68227	-0.708515	-0.711309
COASY/miR-27b	-0.298227	0.0186832	-0.327069	-0.0030263	-0.259081	-0.0910652
VHL/miR-122	-0.29789	-0.489879	-0.246535	-0.514476	-0.195497	-0.187794
CALU/miR-122	-0.297174	-0.47396	-0.294021	-0.455716	-0.399117	-0.361911
RABGGTA/miR-26b	-0.295302	-0.00174862	-0.19414	0.0285268	-0.110437	-0.0666851
RAC1/miR-122	-0.294203	-0.547267	-0.272212	-0.607907	-0.63537	-0.587557
PRR13/miR-3607	-0.293927	-0.0142955	-0.286847	-0.0100028	-0.0417326	-0.0351736
DCAF7/miR-27b	-0.292983	0.052717	-0.288416	0.0492243	0.0161684	0.0598406
TOP1MT-hsa.let.7c	-0.292729	-0.130756	-0.324496	-0.123793	-0.143965	-0.199106
EIF6/miR-505	-0.292108	0.0014125	-0.280811	-0.00816778	0.14813	-0.0005368
PIN1/miR-30c.2	-0.291216	0.0142755	-0.315208	0.0363674	0.307032	0.185776
HMGCL/miR-106b	-0.290264	0.0289435	-0.249527	0.035759	0.0523778	0.0673244
UNC93B1/miR-26b	-0.289907	-0.139793	-0.224933	-0.161695	-0.19537	-0.191218
TPR/miR-378a	-0.28949	-0.276601	-0.280231	-0.301709	-0.277431	-0.278692
EFTUD2/miR-122	-0.289025	-0.499449	-0.30045	-0.50665	-0.308451	-0.287862
MAP2K2/miR-3607	-0.288716	-0.0365464	-0.289897	-0.0611566	-0.00952558	-0.064593
LRP11/miR-122	-0.288365	-0.349811	-0.262838	-0.486528	-0.219765	-0.202582
TRAPPC3/miR-26b	-0.287419	-0.143874	-0.209047	-0.0997863	-0.274648	-0.167869
PSMB5/miR-30e	-0.286828	-0.388802	-0.266467	-0.381217	-0.535191	-0.471372
RMDN1/miR-30c.2	-0.286778	-0.120592	-0.264573	-0.118366	-0.0121123	-0.102132
RPLP0/miR-505	-0.286366	-0.448492	-0.259095	-0.466276	-0.471084	-0.454405
TSTA3/miR-26b	-0.286351	-0.181074	-0.270582	-0.173959	0.00769224	-0.19658
GOLGA3/miR-30c.2	-0.285814	0.10445	-0.279629	0.0973509	0.206641	0.256908
TMEM98/miR-33b	-0.285711	-0.00839623	-0.27668	-0.0203481	-0.06022	-0.0539446
RCC2/miR-378c	-0.285439	-0.42241	-0.279425	-0.41071	-0.440745	-0.422318
SF3A1/miR-122	-0.284954	-0.285351	-0.294067	-0.310049	-0.033497	0.00883791
HSP90AA1/miR-378a	-0.28397	-0.285425	-0.26118	-0.274079	-0.343362	-0.291879
HDAC5/miR-26b	-0.283716	0.0300392	-0.255658	0.00946579	0.0904704	0.0503439
RPL7L1/miR-30c.2	-0.283532	0.207017	-0.307381	0.167125	0.118221	0.124341
CS/miR-122	-0.281551	-0.566809	-0.294997	-0.531451	-0.619203	-0.627952
EFHD2/miR-27b	-0.28104	-0.276323	-0.279686	-0.258365	-0.227607	-0.227735
SP1/miR-378a	-0.280544	-0.223077	-0.286341	-0.245651	-0.276419	-0.245743
SRRM2/miR-505	-0.280245	-0.057702	-0.245793	-0.0625907	-0.0682345	-0.0683845
MTA2/miR-505	-0.279478	0.132063	-0.276539	0.131478	0.0817188	0.101081
MARCKSL1/miR-30e	-0.279303	-0.232365	-0.290617	-0.170005	-0.330566	-0.322913
RAC1/miR-574	-0.278392	-0.222457	-0.241947	-0.216313	-0.29707	-0.294617
IMPDH2/miR-378a	-0.278102	-0.364959	-0.186472	-0.365293	-0.406577	-0.415284
EMC3/miR-30e	-0.277812	-0.255315	-0.254969	-0.289734	-0.293667	-0.187046
MFSD12/miR-26b	-0.277204	-0.217548	-0.209781	-0.194418	-0.303611	-0.261769
BAMBI/miR-30e	-0.277146	-0.310064	-0.28409	-0.315075	-0.349547	-0.330434
RXRB/miR-26b	-0.276572	0.135796	-0.245119	0.112229	0.298387	0.114532
EBNA1BP2/miR-505	-0.274452	0.398899	-0.268321	0.388664	0.258719	0.392953
TRIM28/miR-505	-0.273218	-0.225204	-0.275258	-0.207358	-0.145328	-0.234863
PPP1R11/miR-152	-0.271284	-0.0364058	-0.286603	-0.0366893	-0.131487	-0.116537
SET/miR-505	-0.270305	-0.101036	-0.243143	-0.112641	-0.143921	-0.119309
UBTF/miR-122	-0.269649	-0.342246	-0.257909	-0.277657	-0.322765	-0.325314
RABIF/miR-122	-0.268158	-0.2424	-0.270037	-0.261708	-0.151152	-0.0663227
HIST1H1C/miR-27b	-0.266048	-0.193202	-0.273562	-0.18473	-0.231119	-0.232651
GATAD1/miR-378a	-0.265967	-0.202477	-0.256496	-0.12678	-0.316639	-0.2898
RPL18A-hsa.let.7c	-0.265699	-0.1946	-0.245968	-0.162393	-0.291919	-0.261326
CDC37L1/miR-93	-0.264944	-0.407167	-0.269351	-0.41441	-0.349465	-0.358198
FASN/miR-497	-0.264526	-0.125935	-0.294977	-0.0971747	-0.171447	-0.179805
TBC1D13/miR-26b	-0.264155	-0.157929	-0.275702	-0.158723	-0.147269	-0.148542
CIAPIN1/miR-505	-0.262228	-0.0807426	-0.269214	-0.0802459	-0.225457	-0.0972905
MRPS16/miR-30c.2	-0.262016	0.0750434	-0.261355	0.130783	0.111814	-0.0193661
CHERP/miR-26b	-0.258958	0.0389127	-0.262339	0.063652	0.112739	0.0507151
PODXL/miR-5589	-0.258313	-0.0626224	-0.264555	0.0329567	-0.0471912	-0.0503108
LSG1/miR-125b.2	-0.257406	-0.144182	-0.172836	-0.191646	-0.176076	-0.15755
MAP2K7-hsa.let.7c	-0.257225	-0.150458	-0.240744	-0.134256	-0.126979	-0.186907
SNRPD3/miR-30c.2	-0.256963	0.182763	-0.231278	0.1337	0.200565	0.12924
VMA21/miR-122	-0.256928	-0.532849	-0.293095	-0.595043	-0.492311	-0.474413
SEC23B/miR-122	-0.255686	-0.472683	-0.326016	-0.487994	-0.0345724	-0.1061
SIPA1/miR-26b	-0.251049	-0.249966	-0.238558	-0.157472	-0.2399	-0.246993
SSR3/miR-125b.2	-0.249449	-0.411552	-0.134692	-0.344563	-0.437773	-0.436892
FGFR4/miR-424	-0.248689	-0.176601	-0.239934	-0.169867	-0.242379	-0.245848
C19orf53-hsa.let.7c	-0.248066	-0.294173	-0.254462	-0.292876	-0.146281	-0.218418
GPS1-hsa.let.7c	-0.248049	-0.0736351	-0.253829	-0.0971672	0.0561901	-0.0331081
LASP1/miR-505	-0.247778	-0.19152	-0.240692	-0.155085	-0.141731	-0.171311
HIST1H2BD/miR-27b	-0.246058	-0.214351	-0.170396	-0.271536	-0.247034	-0.246503
RBBP5/miR-122	-0.245607	-0.244609	-0.243512	-0.26133	-0.155087	-0.0636989
COASY/miR-26b	-0.243869	-0.0496175	-0.245541	-0.0639398	-0.0962479	-0.0966181
RPS15A/miR-122	-0.243503	0.00831513	-0.288098	0.0113382	-0.0375533	0.0180587
TAB1/miR-26b	-0.240218	0.142205	-0.147415	0.161143	0.0859758	0.125757
SLC35E1/miR-122	-0.239541	-0.517596	-0.25535	-0.497524	-0.272505	-0.353152
SERPINF2/miR-224	-0.239041	0.0673874	-0.137268	0.0956633	0.0952477	0.0913408
MAPK1/miR-122	-0.238384	-0.252016	-0.230915	-0.25247	-0.0583902	-0.00942465
RPL5/miR-100	-0.237922	-0.483772	-0.236969	-0.504888	-0.380967	-0.443222
LDHD/miR-454	-0.237425	-0.446895	-0.153704	-0.269355	-0.319286	-0.392227
CCT7/miR-505	-0.236779	-0.205791	-0.240752	-0.239893	-0.111937	-0.223086
PTGES2-hsa.let.7c	-0.231554	-0.281436	-0.24077	-0.276016	-0.213205	-0.181706
MAZ/miR-122	-0.23066	-0.29525	-0.181005	-0.302354	-0.149939	-0.0876646
OPTN/miR-122	-0.22952	-0.301278	0.0271362	-0.143172	-0.258974	-0.271012
B4GALT7/miR-152	-0.228022	-0.442614	-0.208719	-0.466324	-0.271689	-0.295715
COPS6-hsa.let.7c	-0.219939	-0.137712	-0.216776	-0.147447	-0.0661598	-0.0911511
TARBP2/miR-26b	-0.217259	0.162152	-0.214495	0.168119	-0.0406084	0.0245777
DCTPP1/miR-378c	-0.215388	-0.283651	-0.199691	-0.293019	-0.369699	-0.326347
CNN3/miR-122	-0.215177	-0.0039915	-0.214425	-0.214421	0.0258458	0.0252876
SLC38A2/miR-19a	-0.214404	-0.070659	-0.297648	-0.0957969	-0.0238706	-0.0338988
MAZ/miR-505	-0.213244	-0.162579	-0.178499	-0.155172	-0.154999	-0.137419
TTLL12/miR-26b	-0.211012	0.0119273	-0.218765	0.0169599	-0.0402949	0.0202178
ZG16/miR-96	-0.210562	-0.247696	-0.179934	-0.21669	-0.175457	-0.164236
NDUFB4/miR-26b	-0.208692	-0.395429	-0.165408	-0.38965	-0.366826	-0.335435
MRPL18/miR-26b	-0.206361	-0.0675345	-0.195205	0.00227336	-0.137676	-0.058882
TIAL1/miR-122	-0.20524	-0.0673491	-0.186345	-0.0684147	0.090873	0.157182
MRPS34/miR-26b	-0.205198	-0.345309	-0.155048	-0.304497	-0.412913	-0.365488
KIF1C/miR-122	-0.204131	-0.179081	-0.196405	-0.162152	0.050014	-0.0591771
CLTC/miR-99a	-0.199515	-0.339312	-0.201429	-0.338405	-0.337144	-0.424694
POLG/miR-505	-0.198491	-0.145052	-0.177639	-0.138385	-0.123258	-0.152329
LONP1/miR-26b	-0.196671	-0.224932	-0.107323	-0.23019	-0.240721	-0.26309
SRPK1/miR-99a	-0.189962	-0.328171	-0.147257	-0.323484	-0.476478	-0.466273
NFE2L1/miR-122	-0.187131	-0.383875	-0.164758	-0.462565	-0.432116	-0.423471
COL4A1/miR-505	-0.186956	-0.174351	-0.141928	-0.0952457	-0.245175	-0.243217
POLR2D/miR-122	-0.184233	-0.315532	-0.178326	-0.434234	-0.0326374	-0.0425665
OCRL/miR-505	-0.183994	-0.0397527	-0.18928	-0.0207108	-0.108497	-0.0861621
THEM6-hsa.let.7c	-0.171051	-0.0350033	-0.178936	-0.0373377	-0.0144223	-0.0888501
LZTR1/miR-505	-0.167655	0.0860427	-0.16858	0.0687601	-0.0352114	0.0287557
NDUFS8/miR-26b	-0.165301	-0.399371	-0.174304	-0.388007	-0.346354	-0.352605
IFRD2/miR-26b	-0.159483	0.113045	-0.15034	0.0815158	0.0139033	0.106137
WIPI2/miR-505	-0.156076	0.0446804	-0.147761	-0.0905424	0.0580609	0.0413681
SLC2A4RG/miR-26b	-0.152733	0.304539	-0.131033	0.303867	0.403305	0.306772

## Sheet: LUAD
Samples Numbers	Samples Number =19				Samples Number =19
Pairs	Normal_Cor	Tumor_Cor	Normal_Pcor(given methylation effect)	Tumor_Pcor(given methylation effect)	Tumor_Pcor(given CNAs effect)	Tumor_cor
C1GALT1/let-7b	-0.932644	0.0886235	-0.934226	0.179303	-0.301116	-0.460698
COIL/miR-15b	-0.901093	-0.429076	-0.889967	0.725304	0.134371	0.259245
PLIN3/miR-30a	-0.883732	-0.761245	-0.793754	-0.791135	-0.52484	-0.487462
GPD1L/miR-210	-0.882428	-0.810083	-0.922211	-0.888067	-0.465259	-0.467205
PTGFRN/miR-30a	-0.866031	-0.434879	-0.857858	-0.427038	-0.532638	-0.448883
INSIG1/miR-210	-0.865882	-0.145838	-0.76459	-0.134377	-0.304159	-0.20379
KCNE4/miR-143	-0.852458	0.111503	-0.859378	0.504521	0.0647262	0.074606
TUBB2A/miR-30a	-0.847431	-0.385107	-0.865955	-0.11666	-0.426796	-0.429516
CNP/miR-30a	-0.837671	-0.0649138	-0.853058	0.090959	-0.33483	-0.572983
NCKAP5/miR-130b	-0.837506	0.195348	-0.879063	0.0653219	0.180926	0.143455
UHMK1/miR-6892	-0.831053	-0.296011	-0.830378	-0.242581	-0.149546	0.0466655
CXorf36/miR-590	-0.827058	-0.314165	-0.792748	-0.557914	-0.466458	-0.268387
PPP1R14C/miR-130b	-0.826982	0.774903	-0.407882	0.73031	0.168586	0.225665
COASY/miR-144	-0.810589	-0.300719	-0.79785	-0.200904	-0.0479972	-0.0261106
CD300C/miR-335	-0.800302	-0.317143	-0.772902	-0.257289	-0.229968	-0.229404
CLDN12/miR-4732	-0.796989	-0.393728	-0.789177	-0.402998	-0.142215	-0.176222
TPD52/miR-15b	-0.79058	-0.226616	-0.79753	-0.22807	-0.0975983	0.0454028
SLC25A22/miR-195	-0.772035	0.661235	-0.77454	0.824972	0.190134	0.301609
TCF3/miR-195	-0.770679	0.844154	-0.750404	0.843876	-0.201975	-0.185599
HCST/miR-335	-0.761764	0.0543901	-0.695792	0.463275	-0.191343	-0.16838
CHST15/miR-30a	-0.756582	-0.530853	-0.768945	-0.275584	-0.538664	-0.529461
PKM/miR-30a	-0.75636	-0.86223	-0.747075	-0.873133	-0.27752	-0.0937014
INTS7-hsa.let.7d	-0.753528	0.138037	-0.751082	0.153743	0.293545	0.346735
MLEC/miR-144	-0.75279	-0.00434978	-0.807837	-0.136907	-0.501786	-0.21997
LMNB2/miR-30a	-0.745221	-0.0627488	-0.770661	-0.159274	-0.591275	-0.582027
TPBG/miR-30a	-0.735586	-0.923712	-0.811962	-0.918941	-0.694507	-0.594443
CLDN12-hsa.let.7b	-0.735329	-0.146691	-0.725386	-0.192578	-0.171199	-0.182778
SOX12/miR-30a	-0.732712	0.562426	-0.742547	0.177569	-0.531721	-0.460663
RDX/miR-31	-0.728404	-0.359748	-0.844161	-0.362117	0.170161	0.19144
CDK7/miR-423	-0.723614	-0.0965168	-0.55819	-0.397083	0.262261	0.277769
CLDN12-hsa.let.7d	-0.716004	-0.00781443	-0.717858	0.105641	0.193313	0.200774
TUBB2A/miR-195	-0.693701	0.687428	-0.674659	0.610016	0.143184	0.0990748
CD2AP/miR-15b	-0.688722	-0.0470624	-0.454205	-0.0444027	0.191585	0.0658222
CFL2/miR-130b	-0.680694	0.611286	-0.758272	0.622559	0.00281169	0.227105
PM20D2-hsa.let.7d	-0.679248	-0.849002	-0.639626	-0.884606	-0.475242	-0.467506
HYOU1/miR-195	-0.675996	-0.29249	-0.748766	-0.236972	-0.090269	-0.0105089
CORO1C/miR-19b.1	-0.672964	-0.179185	-0.779234	-0.596668	-0.123093	-0.040457
TUBB/miR-195	-0.672844	0.423074	-0.819652	0.431286	-0.11815	-0.0841816
SLC35F5/miR-1247	-0.669655	-0.306073	-0.259677	0.0551192	-0.457251	-0.441658
KLC2/miR-195	-0.656427	-0.441709	-0.667256	-0.455758	-0.358282	-0.377303
CCS/miR-143	-0.656033	-0.513296	-0.490877	-0.617003	-0.303744	-0.30836
ZBTB47/miR-21	-0.649704	-0.0519977	-0.55413	0.110995	0.436455	0.248972
MTFR1-hsa.let.7b	-0.645562	-0.548683	-0.617594	-0.322136	0.114334	0.0247544
TRPV2/miR-141	-0.645	-0.643553	-0.646643	-0.644235	-0.657291	-0.673525
CAB39L/miR-155	-0.634487	-0.789878	-0.608514	-0.685534	-0.371717	-0.345689
ERGIC2-hsa.let.7b	-0.633592	0.312393	-0.657172	0.147495	0.353192	0.2958
C5orf22/miR-15b	-0.627882	0.0909902	-0.56079	0.0498309	0.357405	0.30017
C11orf24/miR-195	-0.627231	-0.696191	-0.663307	-0.382804	-0.199705	-0.296422
FSCN1/miR-143	-0.622235	0.688424	-0.675361	0.838255	0.193037	0.196366
HSPB6/miR-29b.1	-0.606588	0.154099	-0.856728	0.120444	0.0661796	0.0594175
COL5A1/miR-143	-0.601099	0.497012	-0.76149	0.517422	0.218155	0.259083
LRPPRC/miR-15b	-0.594864	0.236584	-0.324036	0.369137	0.325319	0.543367
PRPF19/miR-30a	-0.594099	0.651808	-0.742082	0.520285	-0.304641	-0.278588
CRIM1/miR-183	-0.579949	0.55519	-0.594427	0.566946	-0.197995	-0.199643
SEC14L1/miR-708	-0.575062	-0.605591	-0.816008	-0.435469	-0.180168	-0.121212
GATA6/miR-183	-0.573917	0.42723	0.116949	0.475292	-0.0942793	0.0261479
TMEM106B/miR-1247	-0.571899	0.0726291	-0.556319	0.727384	0.247721	0.339917
NACC1/miR-218.2	-0.569386	0.0793223	-0.541507	0.0671291	-0.539139	-0.540143
PNPLA6/miR-15a	-0.557192	0.556488	-0.499598	0.547657	0.038959	0.186977
CORO1C/miR-19a	-0.556546	0.237432	-0.528051	-0.15241	0.147717	0.191072
RAB34/miR-30a	-0.55293	-0.737874	-0.404992	-0.602369	-0.036324	-0.229075
INTS7-hsa.let.7c	-0.550755	0.0918212	-0.553491	-0.184023	-0.0771025	0.146517
PNPLA6/miR-335	-0.550203	0.0277847	-0.5601	0.141746	-0.227054	-0.24701
EFTUD2/miR-195	-0.549988	-0.152446	-0.53519	-0.00944206	-0.135774	-0.126297
BCCIP/miR-423	-0.544626	-0.263011	-0.613546	-0.262616	0.332445	0.302601
LMNB2/miR-190a	-0.537962	-0.00682606	-0.723916	-0.0122457	-0.278	-0.28138
CORO1C/miR-19b.2	-0.53491	-0.0785711	-0.763174	-0.493927	-0.0847909	0.0112321
E2F3/miR-195	-0.517837	0.0574575	-0.725297	-0.690455	0.0356157	-0.212229
TMEM109/miR-15a	-0.513018	-0.401655	-0.527035	-0.441272	-0.131048	-0.131238
C1QA/miR-335	-0.511808	-0.133068	-0.464656	-0.239265	-0.260458	-0.299548
CCDC86/miR-30a	-0.505162	0.110254	-0.450834	0.165894	-0.419146	-0.314187
TMEM106B/miR-145	-0.490231	-0.397856	-0.50191	-0.32435	0.304969	0.221798
ORAI2/miR-143	-0.48819	0.142072	-0.524333	-0.358322	0.205429	0.0499533
ZBTB47/miR-542	-0.48762	0.589787	-0.247897	0.714293	0.58878	0.40368
RAI1/miR-190a	-0.485193	-0.870333	-0.373979	-0.870375	-0.604243	-0.576192
CMBL/miR-6892	-0.484043	0.0527141	-0.17068	-0.176945	-0.00195883	-0.000259462
VASH1/miR-335	-0.480985	0.0492214	-0.480489	0.10395	-0.313506	-0.0204025
SLC35F5/miR-1976	-0.477569	-0.782393	0.0351074	-0.6284	-0.366317	-0.344456
SSR1-hsa.let.7b	-0.475061	-0.540317	-0.474065	-0.520223	0.155093	-0.0170753
LIMK1/miR-143	-0.469952	0.253999	-0.499586	0.234469	0.331713	0.114504
PDGFB/miR-17	-0.466575	0.356743	-0.517327	0.312717	0.0580357	0.052203
AP5Z1/miR-195	-0.447968	0.121717	-0.235988	0.0598317	-0.208727	-0.135447
ASPH/miR-423	-0.447758	-0.552801	-0.434822	-0.248122	-0.23902	-0.160637
EIF2B2/miR-195	-0.446755	-0.22956	0.0401671	0.505165	0.0169596	0.0128013
TMEM106B/miR-1976	-0.442268	-0.0508275	-0.490581	0.0338164	-0.315473	-0.151526
LATS2/miR-135b	-0.44208	-0.0383729	-0.420495	-0.0689205	-0.420918	-0.443999
CBX4/miR-195	-0.427451	0.00996851	-0.542991	-0.145221	-0.208219	-0.0451759
CXCL16/miR-335	-0.418798	0.632372	-0.48425	0.519053	-0.211544	-0.228175
THEMIS2/miR-335	-0.41662	0.0536434	-0.323525	0.167461	0.169813	0.155011
TMED4/miR-15b	-0.407263	-0.57323	-0.826283	-0.537824	-0.12954	-0.246859
BLOC1S4/miR-190a	-0.394619	-0.367421	-0.135537	-0.330968	0.189764	0.179401
PDGFB/miR-20a	-0.391878	0.263054	-0.412168	0.211378	-0.0711671	-0.124045
LRPPRC/miR-139	-0.389048	-0.230321	-0.113352	0.327169	-0.261727	-0.0848397
RBBP8/miR-1247	-0.385373	0.368541	-0.541742	0.49186	-0.116793	-0.178975
TUBB2A/miR-143	-0.379932	0.73898	-0.333704	0.778748	0.0216868	0.0241516
TMEM106B/miR-574	-0.369042	-0.497408	-0.472548	-0.535856	-0.460311	-0.533288
ENO2/miR-99b	-0.367662	0.0512711	-0.445888	-0.289594	0.0183314	-0.00522333
TMEM245/miR-503	-0.364759	-0.274189	-0.410845	-0.225057	-0.358243	-0.378587
RASSF2/miR-429	-0.357312	0.155925	-0.421449	-0.29796	-0.229031	-0.0867278
RASSF2/miR-141	-0.341446	-0.235188	-0.449463	-0.190159	-0.571619	-0.576122
TMED4/miR-140	-0.340419	0.196152	-0.582022	0.328397	-0.157137	-0.0463595
TMEM245/miR-187	-0.331493	-0.606207	-0.350632	-0.504014	-0.542401	-0.49154
TLK1/miR-15b	-0.329388	0.431376	-0.0251579	0.41757	0.397034	0.602004
TRIM28/miR-30a	-0.328045	0.758944	-0.332242	0.703845	-0.323433	-0.222101
TGFBR3/miR-424	-0.323116	-0.400241	-0.0835784	-0.407797	0.0926751	-0.0649584
MSMO1/miR-93	-0.315295	-0.340915	-0.489777	-0.281822	-0.030031	0.00075634
NT5E/miR-30a	-0.314238	-0.777043	0.458211	-0.926452	0.123472	0.10579
PPP1R14C/miR-181b.2	-0.294788	0.221188	-0.184222	0.195114	0.160065	0.187816
C1orf21/miR-503	-0.291279	-0.0881278	-0.369706	0.088359	0.0536299	0.0412419
XPO5/miR-143	-0.290933	0.183588	-0.503071	0.269828	0.442845	0.440738
TJP1/miR-155	-0.286592	-0.23491	0.151718	-0.255781	-0.4257	-0.429027
TMCO1/miR-1976	-0.277845	-0.532592	-0.268473	-0.554679	-0.411954	-0.506188
DOCK4/miR-155	-0.267681	0.621412	-0.16418	0.67489	0.518774	0.553411
TMCO1/miR-504	-0.258589	0.551031	-0.248385	0.480263	0.126995	0.455624
BNIP3/miR-145	-0.256202	0.0765832	-0.73976	-0.0583101	0.0898141	-0.00852915
VIM/miR-17	-0.234948	-0.45612	-0.34288	-0.504805	-0.506848	-0.502544
RPL36A/miR-328	-0.225858	-0.493808	-0.595322	-0.504337	-0.219989	-0.201911
SELPLG/miR-335	-0.205573	-0.0797853	-0.435129	-0.374716	-0.166844	-0.185922
CMBL/miR-3615	-0.190203	0.212793	0.195739	-0.179622	0.251314	0.250977
SIRPA/miR-141	-0.182493	-0.779926	-0.4376	-0.780239	-0.73661	-0.731576
MGAT3/miR-335	-0.177287	0.551442	-0.166507	0.434975	0.0655564	0.0381791
GALNT3/miR-504	-0.170084	-0.594227	0.120939	-0.854414	-0.415862	-0.402128
U2SURP/miR-15b	-0.154418	0.643508	-0.111563	0.722918	0.606481	0.705995
ACP1-hsa.let.7b	-0.149245	-0.590469	-0.482454	-0.559747	0.452002	0.35943
LRP1/miR-335	-0.148938	-0.613405	-0.359592	-0.767063	-0.1603	-0.150689
SCIMP/miR-335	-0.143336	0.217104	-0.0187202	0.390443	-0.123414	-0.0733042
SSR1/miR-1976	-0.123805	-0.150846	-0.119901	-0.0741637	-0.27623	-0.0886838
SPN/miR-335	-0.109212	0.210512	-0.223169	0.202588	0.0100276	-0.06108
MFNG/miR-335	-0.109166	0.515493	-0.00206258	0.530048	-0.0637795	-0.0809727
CD4/miR-450b	-0.08734	-0.111603	-0.101195	-0.118393	0.194923	0.187595
ABCF2/miR-218.2	-0.0782506	0.126945	-0.22433	0.269137	-0.235739	-0.10857
VAT1/miR-335	-0.041199	0.280845	-0.0595325	0.301514	0.2351	0.233982
C1orf198/miR-31	-0.0297775	-0.45048	0.0463089	-0.753401	-0.243549	-0.122978
CMBL/miR-197	-0.0186563	0.332615	0.306669	-0.481185	0.153793	0.149089
JUP/miR-30a	0.0336757	-0.18444	-0.10691	-0.395857	0.123354	-0.223849
PPFIBP1/miR-155	0.0627436	0.459764	0.033328	0.445295	0.0472652	0.236985
HIST2H2BE/miR-423	0.122228	-0.0781924	0.23263	0.0969154	0.352958	0.403366
TIMP3/miR-21	0.16239	-0.0451369	0.182288	0.00914915	0.243139	0.232375
CYGB/miR-335	0.189753	0.137594	0.330101	0.159042	-0.48565	-0.483307
HIST2H2BE/miR-15b	0.236075	0.855194	0.280936	0.856375	0.661328	0.685623
MYH11/miR-128.2	0.255682	0.332894	0.43806	0.503314	0.228429	0.128892
